# Supplementary material for: The tomato chloroplast stromal proteome compendium elucidated by leveraging a plastid protein-localization prediction Atlas
Source: Front Plant Sci. 2023 Aug 28;14:1020275. doi: 10.3389/fpls.2023.1020275 (PMC10493611; doi:10.3389/fpls.2023.1020275)
Supplement: Supplementary file 3 [file Table_1.xlsx]

## Sheet: Table S1A. Acetone Primary data
Table S1A: Proteomics data from acetone samples
												Acetone Sample #1				Acetone Sample #2				Acetone Sample #3				Acetone Sample #4				Acetone Sample #5				Detection in Acetone samples						Classification and Database Detection
Tomato accession	Description	Arabidopsis homolog	Sequence	Exp q-value	Sum PEP Score	Decoy Proteins	Coverage	Peptides	PSMs	Protein Unique Peptides	emPAI	Score	Coverage	Peptides	PSMs	Score	Coverage	Peptides	PSMs	Score	Coverage	Peptides	PSMs	Score	Coverage	Peptides	PSMs	Score	Coverage	Peptides	PSMs	Sample #5	Sample #4	Sample #3	Sample #2	Sample #1	Total	Category	Detection
544163593	photosystem II protein D1 (chloroplast) [Solanum lycopersicum]	ATCG00020	MTAILERRESESLWGRFCNWITSTENRLYIGWFGVLMIPTLLTATSVFIIAFIAAPPVDIDGIREPVSGSLLYGNNIISGAIIPTSAAIGLHFYPIWEAASVDEWLYNGGPYELIVLHFLLGVACYMGREWELSFRLGMRPWIAVAYSAPVAAATAVFLIYPIGQGSFSDGMPLGISGTFNFMIVFQAEHNILMHPFHMLGVAGVFGGSLFSAMHGSLVTSSLIRETTENESANEGYRFGQEEETYNIVAAHGYFGRLIFQYASFNNSRSLHFFLAAWPVVGIWFTALGISTMAFNLNGFNFNQSVVDSQGRVINTWADIINRANLGMEVMHERNAHNFPLDLAAIEAPSTNG	0	8.588	0	6.79887	2	3	2	0.668	NA	0	NA	NA	5	6.79887	2	2	NA	0	NA	NA	NA	0	NA	NA	2.45	3.11615	1	1	1	0	0	1	0	2	WTSP	Atlas only
544163595	ribosomal protein S16 (chloroplast) [Solanum lycopersicum]	ATCG00050	MVKLRLKRCGRKQRAVYRIVAIDVRSRREGKDLQKVGFYDPIKNQTYLNVPAILYFLEKGAQPTETVQDILKKAEVFKELRLNQPKFN	0	19.088	0	51.1364	5	14	5	30.623	13.81	51.1364	4	6	7.51	43.1818	3	3	3.38	14.7727	1	1	2.92	14.7727	1	1	5.34	35.2273	3	3	1	1	1	1	1	5	WTSP	Atlas only
544163598	ATP synthase CF1 alpha subunit (chloroplast) [Solanum lycopersicum]	ATCG00120	MVTIRADEISNIIRERIEQYNREVKIVNTGTVLQVGDGIARIHGLDEVMAGELVEFEEGTIGIALNLESNNVGVVLMGDGLLIQEGSSVKATGRIAQIPVSEAYLGRVVNALAKPIDGRGEISASEFRLIESAAPGIISRRSVYEPLQTGLIAIDSMIPIGRGQRELIIGDRQTGKTAVATDTILNQQGQNVICVYVAIGQKASSVAQVVTTLQERGAMEYTIVVAETADSPATLQYLAPYTGAALAEYFMYRERHTLIIYDDLSKQAQAYRQMSLLLRRPPGREAYPGDVFYLHSRLLERAAKLSSSLGEGSMTALPIVETQSGDVSAYIPTNVISITDGQIFLSADLFNSGIRPAINVGISVSRVGSAAQIKAMKQVAGKLKLELAQFAELEAFAQF…	0	148.426	0	38.856	22	673	22	78.433	332.97	38.6588	20	125	432.6	37.2781	21	162	377.16	36.6864	19	133	347.55	33.7278	17	131	319.42	37.0809	19	122	1	1	1	1	1	5	WTSP	Atlas only
544163599	ATP synthase CF0 subunit I (chloroplast) [Solanum lycopersicum]	ATCG00130	MKNVTDSFVSLGHWPSAGSFGFNTDILATNPINLSVVLGVLIFFGKGVLSDLLDNRKQRILNTIRNSEELRGGAIEQLEKARSRLRKVETEAEQFRVNGYSEIEREKLNLINSTYKTLEQLENYKNETIQFEQQRAINQVRQRVFQQALRGALGTLNSCLNNELHLRTISANIGMLGTMKEITD	0	15.749	0	22.8261	4	11	4	1.424	5.13	10.3261	2	2	5.01	5.43478	1	2	5.63	12.5	2	2	5.43	12.5	2	2	8.21	17.9348	3	3	1	1	1	1	1	5	WTSP	Atlas only
544163602	ribosomal protein S2 (chloroplast) [Solanum lycopersicum]	ATCG00160	MTRRYWNINLEEMMEAGVHFGHGTRKWNPKMAPYISAKRKGIHITNLTRTARFLSEACDLVFDAASRGKQFLIVGTKNKAADSVEWAAIRARCHYVNKKWLGGMLTNWSTTETRLHKFRDLRMEQKTGRLNRLPKRDAAMLKRQLSRLQTYLGGIKYMTGVPDIVIIVDQHEEYTALRECITLGIPTICLTDTNCDPDLADISIPANDDAISSIRLILNKLVFAICEGRSSYIRNP	0	25.828	0	17.3729	5	14	4	2.981	16.5	13.9831	4	6	2.99	6.35593	1	1	4.04	7.20339	2	2	4.35	7.20339	2	2	7.79	13.5593	3	3	1	1	1	1	1	5	WTSP	Atlas only
544163603	RNA polymerase beta' subunit (chloroplast) [Solanum lycopersicum]	ATCG00170	MEVLMAERANLVFHNKAIDGTAMKRLISRLIEHFGMAYTSHILDQVKTLGFQQATATSISLGIDDLLTIPSKGWLVQDAEQQSLILEKHHQYGNVHAVEKLRQSIEIWYATSEYLRQEMNPNFRMTDPFNPVHIMSFSGARGNASQVHQLVGMRGLMSDPQGQMIDLPIQSNLREGLSLTEYIISCYGARKGVVDTAVRTSDAGYLTRRLVEVVQHIVVRRTDCGTARGISVSPRNGIMPERIFSQTLIGRVLADDIYMGSRCIATRNQAIGIGLVNRFITFRAQPISIRTPFTCRSTSWICRLCYGRSPTHGDLVELGEAVGIIAGQSIGEPGTQLTLRTFHTGGVFTGGTAEHVRAPSNGKIKFNEDLVHPTRTRHGHPAFLCSIDLYVTIESEDIL…	0	47.185	0	7.11207	10	16	9	0.396	33.89	7.11207	10	12	2.13	0.933908	1	1	NA	0	NA	NA	1.64	0.646552	1	1	5.94	1.79598	2	2	1	1	0	1	1	4	WTSP	Atlas only
544163604	RNA polymerase beta subunit (chloroplast) [Solanum lycopersicum]	ATCG00180	MNNNFSSMIDRYKHQQLRIGSVSPQQISAWATKILPNGEIVGEVTKPYTFHYKTNKPEKDGLFCERIFGPIKSGICACGNYRVIGDEKEDPKFCEQCGVEFVDSRIRRYQMGYIKLACPVTHVWYLKRLPSYIANLLDKPLKELEGLVYCDFSFARPITKKPTFLRLRGLFEYEIQSWKYSIPLFFTTQGFDTFRNREISTGAGAIREQLADLDLRIIIENSLVEWEELGEEGHTGNEWEDRKVGRRKDFLVRRVELAKHFIRTNIEPEWMVLCLLPVLPPELRPIIQIDGGKLMSSDINELYRRVIYRNNTLTDLLTTSRSTPGELVMCQEKLVQEAVDTLLDNGIRGQPMRDGHNKVYKSFSDVIEGKEGRFRETLLGKRVDYSGRSVIVVGPSLSL…	0	20.972	0	10.4651	6	6	6	0.425	16.2	10.4651	6	6	NA	0	NA	NA	NA	0	NA	NA	NA	0	NA	NA	NA	0	NA	NA	0	0	0	0	1	1	WTSP	Atlas only
544163605	RNA polymerase beta subunit (chloroplast) [Solanum lycopersicum]	ATCG00190	MLGDGNEGISTIPGFNQIQFEGFCRFIDQGLTEELYKFPKIEDTDQEIEFQLFVETYQLVEPLIKERDAVYESLTYSSELYVSAGLIWKNSRDMQEQTIFIGNIPLMNSLGTSIVNGIYRIVINQILQSPGIYYRSELDHNGISVYTGTIISDWGGRSELEIDRKARIWARVSRKQKISILVLSSAMGLNLREILENVCYPEIFLSFLNDKERKKIGSKENSILEFYQQFACVGGDPVFSESLCKELQKKFFQQRCELGRIGRRNMNRKLNLDIPQNNTFLLPRDILAAADHLIGLKFGMGALDDMNHLKNKRIRSVADLLQDQFGLALVRLENVVRGTICGAIRHKLIPTPQNLVTSPPLTTTYESFFGLHPLSQVLDRTNPLTQIVHGRKLSYLGPG…	0	37.738	0	7.19626	6	14	5	0.551	23.01	6.16822	5	7	7.53	1.40187	1	2	4.8	1.40187	1	1	3.49	1.40187	1	1	10.77	3.73832	3	3	1	1	1	1	1	5	WTSP	Atlas only
544163609	photosystem II CP43 chlorophyll apoprotein (chloroplast) [Solanum lycopersicum]	ATCG00280	MKTLYSLRRFYHVETLFNGTLALAGRDQETTGFAWWAGNARLINLSGKLLGAHVAHAGLIVFWAGAMNLFEVAHFVPEKPMYEQGLILLPHLATLGWGVGPGGEVIDTFPYFVSGVLHLISSAVLGFGGIYHALLGPETLEESFPFFGYVWKDRNKMTTILGIHLILLGIGAFLLVFKALYFGGVYDTWAPGGGDVRKITNLTLSPSIIFGYLLKSPFGGEGWIVSVDDLEDIIGGHVWLGSICILGGIWHILTKPFAWARRALVWSGEAYLSYSLGALAVFGFIACCFVWFNNTAYPSEFYGPTGPEASQAQAFTFLVRDQRLGANVGSAQGPTGLGKYLMRSPTGEVIFGGETMRFWDLRAPWLEPLRGPNGLDLSRLKKDIQPWQERRSAEYMTHA…	0.006	2.914	8	2.95983	1	1	1	0.212	NA	0	NA	NA	NA	0	NA	NA	NA	0	NA	NA	NA	0	NA	NA	3.29	2.95983	1	1	1	0	0	0	0	1	WTSP	Atlas only
544163611	ribosomal protein S14 (chloroplast) [Solanum lycopersicum]	ATCG00330	MARKSLIQREKKRQKLEQKYHSIRRSSKKEISKVPSLSDKWEIYGKLQSLPRNSAPTRLHRRCFLTGRPRANYRDFGLSGHILREMVHACLLPGATRSSW	0	27.366	0	27	3	26	3	6.197	26.97	27	3	8	17.8	23	2	6	10.63	23	2	4	9.97	23	2	4	12.75	23	2	4	1	1	1	1	1	5	WTSP	Atlas only
544163612	photosystem I P700 apoprotein A2 (chloroplast) [Solanum lycopersicum]	ATCG00340	MALRFPRFSQGLAQDPTTRRIWFGIATAHDFESHDDITEERLYQNIFASHFGQLAIIFLWTSGNLFHVAWQGNFESWVQDPLHVRPIAHAIWDPHFGQPAVEAFTRGGALGPVNIAYSGVYQWWYTIGLRTNEDLYTGALFLLFLSAISLIAGWLHLQPKWKPSVSWFKNAESRLNHHLSGLFGVSSLAWTGHLVHVAIPASRGEYVRWNNFLDVLPHPQGLGPLFTGQWNLYAQNPDSSSHLFGTAEGAGTAILTLLGGFHPQTQSLWLTDIAHHHLAIAFIFLVAGHMYRTNFGIGHSMKDLLDAHIPPGGRLGRGHKGLYDTINNSLHFQLGLALASLGVITSLVAQHMYSLPAYAFIAQDFTTQAALYTHHQYIAGFIMTGAFAHGAIFFIRDYN…	0	9.536	0	4.76839	3	8	2	1.154	7.36	4.76839	3	4	NA	0	NA	NA	2.5	1.63488	1	1	1.82	1.90736	1	1	5.6	3.54223	2	2	1	1	1	0	1	4	WTSP	Atlas only
544163613	photosystem I P700 apoprotein A1 (chloroplast) [Solanum lycopersicum]	ATCG00350	MIIRSPEPEVKILVDRDPVKTSFEEWARPGHFSRTIAKGPDTTTWIWNLHADAHDFDSHTSDLEEISRKVFSAHFGQLSIIFLWLSGMYFHGARFSNYEAWLSDPTHIGPSAQVVWPIVGQEILNGDVGGGFRGIQITSGFFQLWRASGITSELQLYCTAIGALVFAALMLFAGWFHYHKAAPKLAWFQDVESMLNHHLAGLLGLGSLSWAGHQVHVSLPINQFLNAGVDPKEIPLPHEFILNRDLLAQLYPSFAEGATPFFTLNWSKYADFLTFRGGLDPVTGGLWLTDIAHHHLAIAILFLIAGHMYRTNWGIGHGLKDILEAHKGPFTGQGHKGLYEILTTSWHAQLSLNLAMLGSLTIVVAHHMYSMPPYPYLATDYGTQLSLFTHHMWIGGFLI…	0.008	2.504	11	1.33333	1	1	1	0.155	0	1.33333	1	1	NA	0	NA	NA	NA	0	NA	NA	NA	0	NA	NA	NA	0	NA	NA	0	0	0	0	1	1	WTSP	Atlas only
544163614	photosystem I assembly protein ycf3 (chloroplast) [Solanum lycopersicum]	ATCG00360	MPRSRINGNFIDKTFSIVADILLRVIPTTSGEKEAFTYYRDGMSAQSEGNYAEALQNYYEAMRLEIDPYDRSYILYNIGLIHTSNGEHTKALEYYFRALERNPFLPQAFNNMAVICHYRGEQAIQQGDSEIAEAWFDQAAEYWKQAIALTPGNYIEARNWLKITRRFE	0	9.766	0	19.6429	3	18	3	1.683	6.91	19.6429	3	3	7.92	14.881	2	3	8.6	11.3095	2	4	12.72	19.6429	3	5	8.55	19.6429	3	3	1	1	1	1	1	5	WTSP	Atlas only
544163615	ribosomal protein S4 (chloroplast) [Solanum lycopersicum]	ATCG00380	MSRYRGPRFKKIRRLGALPGLTNKKPRTGSDLRNQSRSGKKSQYRIRLEEKQKLRFHYGLTERQLLKYVRIARKAKGSTGQVLLQLLEMRLDNILFRLGMASTIPAARQLVNHRHILVNGHIVDIPSYRCKPRDIITAKDEQKSRALIQISLDSSPHEELPNHLTLQPFQYKGLVNQIIDSKWVGLKINELLVVEYYSRQT	0	54.889	0	46.2687	9	43	8	17.738	53.68	46.2687	9	19	17.08	22.8856	4	6	19.6	27.3632	5	7	7.2	15.4229	3	3	21.94	38.3085	7	8	1	1	1	1	1	5	WTSP	Atlas only
544163616	NADH-plastoquinone oxidoreductase subunit J (chloroplast) [Solanum lycopersicum]	ATCG00420	MQGRLSAWLVKHGLIHRSLGFDYQGIETLQIKPEDWHSIAVIFYVYGYNYLRSQCAYDVAPGGLLASVYHLTRIEDGVAQPEELCIKVFASRRNPRIPSVFWVWKSVDFQERESYDMLGISYDNHPRLKRILMPESWIGWPLRKDYIAPNFYEIQDAH	0	24.511	0	36.0759	6	20	6	6.499	18.47	27.8481	4	6	12.71	19.6203	3	5	7.72	18.3544	3	3	3.82	8.22785	2	2	9.94	18.3544	3	4	1	1	1	1	1	5	WTSP	Atlas only
544163619	ATP synthase CF1 epsilon subunit (chloroplast) [Solanum lycopersicum]	ATCG00470	MTLNLSVLTPNRIVWDSEVEEIVLSTNSGQIGILPNHAPIATAVDIGILRIRLNDQWLTMALMGGFARIGNNEITVLVNDAEKGSDINPQEAQQTLEIAEANVKKAEGRRQKIEANLALRRARTRVEASNPIS	0	48.776	0	30.8271	4	79	4	99	60.17	30.8271	4	19	49.06	30.8271	3	15	45.66	30.8271	3	14	56.21	30.8271	3	16	52.35	30.8271	3	15	1	1	1	1	1	5	WTSP	Atlas only
544163620	ATP synthase CF1 beta subunit (chloroplast) [Solanum lycopersicum]	ATCG00480	MRINPTTSGSGVSTLEKKNPGRVVQIIGPVLDVAFPPGKMPNIYNALVVQGRDSVGQPINVACEVQQLLGNNRVRAVAMSATEGLTRGMAVIDTGAPISVPVGGATLGRIFNVLGEPVDNLGPVDTSTTSPIHRSAPAFIQLDTKLSIFETGIKVVDLLAPYRRGGKIGLFGGAGVGKTVLIMELINNIAKAHGGVSVFGGVGERTREGNDLYMEMKESGVINKENIAESKVALVYGQMNEPPGARMRVGLTALTMAEYFRDVNEQDVLLFIDNIFRFVQAGSEVSALLGRMPSAVGYQPTLSTEMGSLQERITSTKEGSITSIQAVYVPADDLTDPAPATTFAHLDATTVLSRGLAAKGIYPAVDPLDSTSTMLQPRIVGEEHYETAQRVKQTLQRYK…	0	299.795	0	53.8153	30	1094	28	2153.43	553.67	46.988	23	209	589.7	47.3896	23	216	709.06	50.6024	25	249	587.18	50.8032	25	208	590.14	53.4137	28	212	1	1	1	1	1	5	WTSP	Atlas only
544163621	ribulose-1,5-bisphosphate carboxylase/oxygenase large subunit (chloroplast) [Solanum lycopersicum]	ATCG00490	MSPQTETKASVGFKAGVKEYKLTYYTPEYQTKDTDILAAFRVTPQPGVPPEEAGAAVAAESSTGTWTTVWTDGLTSLDRYKGRCYRIERVVGEKDQYIAYVAYPLDLFEEGSVTNMFTSIVGNVFGFKALRALRLEDLRIPPAYVKTFQGPPHGIQVERDKLNKYGRPLLGCTIKPKLGLSAKNYGRAVYECLRGGLDFTKDDENVNSQPFMRWRDRFLFCAEALFKAQTETGEIKGHYLNATAGTCEEMIKRAVFARELGVPIVMHDYLTGGFTANTTLAHYCRDNGLLLHIHRAMHAVIDRQKNHGIHFRVLAKALRMSGGDHIHSGTVVGKLEGERDITLGFVDLLRDDFVEQDRSRGIYFTQDWVSLPGVLPVASGGIHVWHMPALTEIFGDDSV…	0	285.172	0	51.153	31	1339	27	1614.6	761.19	46.3312	27	356	419.73	41.7191	22	191	670.79	45.7023	25	291	533.87	45.7023	24	228	682.24	45.283	25	273	1	1	1	1	1	5	WTSP	Atlas only
544163622	acetyl-CoA carboxylase carboxyltransferase beta subunit (chloroplast) [Solanum lycopersicum]	ATCG00500	MTIHLLYFHANRGQENSMERWWFNSMLFKKEFERRCGLNKSMGSLGPIENTSEDPNLKVKNIHSCSNVDYLFGVKDIWNFISNDTFLVSDRNGDSYSIYFDIENHIFEVDNDHSFLSELESSFYSYRNSSYLNNGFRGEDPYYNSYMSYMYDTQYSWNNHINSCIDNYLQSQICIDTSIISGSESNGDSYIYRAICSGQSLNSSENEGSSRRTRTKDSDLTIRESSNDLEVTQKYKHLWVQCENCYGLNYKKFLKSKMNICEQCGYHLKMSSSDRIELLIDPGTWDPMDEDMVSLDPIEFHSEEEPYKDRIDSYQRKTGLTEAVQTGIGQLNGIPVAIGVMDFQFMGGSMGSVVGEKITRLIEHAANQNLPLMIVCASGGARMQEGSLSLMQMAKISSA…	0	60.323	0	23.8659	11	33	11	3.642	35.72	20.1183	9	12	23.54	16.9625	8	9	13.58	9.07298	4	5	9.93	8.08679	4	4	7.96	7.29783	3	3	1	1	1	1	1	5	WTSP	Atlas only
544163626	cytochrome f (chloroplast) [Solanum lycopersicum]	ATCG00540	MQTRNAFSWLKKQITRSISVSLMIYILTRTSISSAYPIFAQQGYENPREATGRIVCANCHLANKPVEIEVPQAVLPDTVFEAVVRIPYDMQLKQVLANGKKGGLNVGAVLILPEGFELAPPDRISPEMKEKIGNLSFQSYRPNKTNILVVGPVPGKKYSEITFPILSPDPATKKDVHFLKYPIYVGGNRGRGQIYPDGNKSNNTVYNATAAGIVSKIIRKEKGGYEITITDASEGRQVVDIIPPGPELLVSEGESIKFDQPLTSNPNVGGFGQGDAEIVLQDPLRVQGLLFFLASVILAQIFLVLKKKQFEKVQLAEMNF	0	30.573	0	30.625	8	24	4	3.394	9.75	12.5	3	3	18.39	18.75	5	7	10.71	6.875	2	3	12.25	14.6875	4	5	15.67	15.9375	4	6	1	1	1	1	1	5	WTSP	Atlas only
544163630	photosystem II cytochrome b559 alpha subunit (chloroplast) [Solanum lycopersicum]	ATCG00580	MSGSTGERSFADIITSIRYWVIHSITIPSLFIAGWLFVSTGLAYDVFGSPRPNEYFTESRQGIPLITGRFDPLEQLDEFSRSF	0.014	2.186	19	10.8434	1	1	1	0	NA	0	NA	NA	NA	0	NA	NA	1.87	10.8434	1	1	NA	0	NA	NA	NA	0	NA	NA	0	0	1	0	0	1	WTSP	Atlas only
544163634	ribosomal protein L33 (chloroplast) [Solanum lycopersicum]	ATCG00640	MAKGKDVRVTVILECTSCVRNSVDKVSRGISRYITQKNRHNTPNRFELKKFCPYCYKHTIHGEIKK	0.046	1.631	66	12.1212	1	1	1	0.778	2.6	12.1212	1	1	NA	0	NA	NA	NA	0	NA	NA	NA	0	NA	NA	NA	0	NA	NA	0	0	0	0	1	1	WTSP	Atlas only
544163635	ribosomal protein S18 (chloroplast) [Solanum lycopersicum]	ATCG00650	MDKSKRPFLKFKRSFRRRLPPIQSGDRIDYRNMSLISRFISEQGKILSRRVNRLTLKQQRLITLAIKQARILSLLPFLNNEKQFERTESTARTTGFKARNK	0	8.264	0	28.7129	3	18	3	2.162	12.34	28.7129	3	5	1.98	6.93069	1	1	10.41	28.7129	3	4	5.14	18.8119	2	3	9.42	28.7129	3	5	1	1	1	1	1	5	WTSP	Atlas only
544163636	ribosomal protein L20 (chloroplast) [Solanum lycopersicum]	ATCG00660	MTRIKRGYIARRRRTKIRLFASSFRGAHSRLTRTITQQKIRALVSAHRDRDRKKRDFRRLWITRINAVIRERGVSYSYSRLIHDLYKRQLLLNRKILAQIAISNRNCLYMISNEIIKEVDWKESTRII	0	11.081	0	23.4375	5	12	5	3.642	11.71	23.4375	5	9	4.6	6.25	2	3	NA	0	NA	NA	NA	0	NA	NA	NA	0	NA	NA	0	0	0	1	1	2	WTSP	Atlas only
544163637	clp protease proteolytic subunit (chloroplast) [Solanum lycopersicum]	ATCG00670	MPIGVPRVVFRNPGDPISSWVDIYNRLYRERLLFLGQGIGTELSNQLIGLMLYLSMEDENKDLYLFVNSPGGWVIPGIAIYDTMQFVRPDIHTICLGLAASMGSFILAGGQLTKRIAFPHARVMIHEPYSGFYMAQVGEFVLEAIEMAKLRETLTRVYAEKTGQPVWVIHEDMERDIFMSATEAQAYGIVDFVAVQGKEHGFHADL	0	36	0	17.9612	4	40	4	38.811	28.52	17.9612	4	9	25.92	17.4757	3	8	21.49	14.0777	2	6	31.18	14.0777	2	9	28.1	14.0777	2	8	1	1	1	1	1	5	WTSP	Atlas only
544163638	photosystem II CP47 chlorophyll apoprotein (chloroplast) [Solanum lycopersicum]	ATCG00680	MGLPWYRVHTVVLNDPGRLLSVHIMHTALVAGWAGSMALYELAVFDPSDPVLDPMWRQGMFVIPFMTRLGITNSWGGWSITGGTVTNPGIWSYEGVAGAHIVFSGLCFLAAIWHWVYWDLEIFCDERTGKPSLDLPKIFGIHLFLSGVACFGFGAFHVTGLYGPGIWVSDPYGLTGKVQPVNPAWGVEGFDPFVPGGIASHHIAAGTLGILAGLFHLSVRPPQRLYKGLRMGNIETVLSSSIAAVFFAAFVVAGTMWYGSATTPIELFGPTRYQWDQGYFQQEIYRRVSAGLAENQSLSEAWSKIPEKLAFYDYIGNNPAKGGLFRAGSMDNGDGIAVGWLGHPIFRDKEGRELFVRRMPTFFETFPVVLVDGDGIVRADVPFRRAESKYSVEQVGVTV…	0	5.396	0	2.3622	2	3	2	0.52	NA	0	NA	NA	1.94	2.16535	1	1	NA	0	NA	NA	NA	0	NA	NA	5.57	2.3622	2	2	1	0	0	1	0	2	WTSP	Atlas only
544163642	cytochrome b6 (chloroplast) [Solanum lycopersicum]	ATCG00720	MSKVYDWFEERLEIQAIADDITSKYVPPHVNIFYCLGGITLTCFLVQVATGFAMTFYYRPTVTEAFASVQYIMTEANFGWLIRSVHRWSASMMVLMMILHVFRVYLTGGFKKPRELTWVTGVVLAVLTASFGVTGYSLPWDQIGYWAVKIVTGVPDAIPVIGSPLVELLRGSASVGQSTLTRFYSLHTFVLPLLTAVFMLMHFPMIRKQGISGPL	0.013	2.251	17	3.72093	1	2	1	0.468	NA	0	NA	NA	NA	0	NA	NA	NA	0	NA	NA	NA	0	NA	NA	4.07	3.72093	1	2	1	0	0	0	0	1	WTSP	Atlas only
544163644	RNA polymerase alpha subunit (chloroplast) [Solanum lycopersicum]	ATCG00740	MVREKVTVSTRTLQWKCVESRTDSKRLYYGRFILSPLMKGQADTIGIAMRRALLGEIEGTCITRVKSEKVPHEYSTITGIQESVHEILMNLKEIVLRSNLYGTSEASICVKGPGYVTAQDIILPPYVEIVDNTQHIASLTEPIDFCIGLQIERNRGYLIKTPHNFQDGSYPIDAVFMPVRNANHSIHSYGNGNEKQEILFIEIWTNGSLTPKEALHDASRNLIDLFIPFLHMEEDNLYLQDNQHTVPLSPFTFHDKLAKLIKNKKKIALKSIFIDQSELSSRIYNCLKMSNIYTLLDLLNNSQEDLMKIEHFRSEDIKQILDILEKYFVIDLAKNKF	0	10.11	0	10.3858	4	6	4	1.154	3.78	4.74777	2	2	3.97	5.63798	2	2	2.37	2.37389	1	1	0	2.37389	1	1	NA	0	NA	NA	0	1	1	1	1	4	WTSP	Atlas only
544163648	ribosomal protein S8 (chloroplast) [Solanum lycopersicum]	ATCG00770	MGRDTIAEIITSIRNADMDRKRVVRIASTNITENIVQILLREGFIENVRKHRENNKYFLVLTLRHRRNRKRPYRNILNLKRISRPGLRIYSNYQRIPRILGGMGIVILSTSRGIMTDREARLEGIGGEILCYIW	0	35.923	0	47.7612	6	31	6	4.337	35.97	47.7612	6	12	12.21	34.3284	4	5	14.82	28.3582	3	5	9.26	27.6119	3	4	15.74	17.9104	2	5	1	1	1	1	1	5	WTSP	Atlas only
544163649	ribosomal protein L14 (chloroplast) [Solanum lycopersicum]	ATCG00780	MIQPQTHLNVADNSGARELMCIRIIGASNRRYAHIGDVIVAVIKEAVPNMPLERSEVVRAVIVRTCKELKRDNGMIIRYDDNAAVVIDQEGNPKGTRIFGAIARELRELNFTKIVSLAPEVL	0	58.992	0	58.1967	7	40	7	14.849	51.03	58.1967	7	16	19.26	45.9016	4	6	18.71	37.7049	3	6	16.65	37.7049	3	5	22.62	37.7049	3	7	1	1	1	1	1	5	WTSP	Atlas only
544163650	ribosomal protein L16 (chloroplast) [Solanum lycopersicum]	AT2G28830	MLSPKRTRFRKQHRGRMKGISYRGNRISFGKYALQALEPAWITSRQIEAGRRAMTRNARRGGKIWVRIFPDKPVTLRPAETRMGSGKGSPEYWVAVVKPGRILYEMGGVTENIARRAISLAASKMPIRTQFIIS	0	34.931	0	42.5373	4	18	4	9	35.75	42.5373	4	12	9.69	32.0896	3	4	NA	0	NA	NA	NA	0	NA	NA	5.12	10.4478	1	2	1	0	0	1	1	3	WTSP	Atlas only
544163651	ribosomal protein S3 (chloroplast) [Solanum lycopersicum]	ATCG00800	MGQKINPLGFRLGTTQSHHSLWFSQPKNYSEGLQEDKKIRDCIKNYVQKNMRTSSGIEGIARIEIQKRIDLIQVIIFMGFPKLLIESRPRGIEELQMTLQKEFNCVNRKLNIAVTRIAKPYGNPNILAEFIAGQLKNRVSFRKAMKKAIELTEQADTKGIQIQIAGRIDGKEIARVEWIREGRVPLQTIRAKIDYCSYTVRTIYGILGIKIWIFLDEE	0	60.656	0	49.0826	13	61	13	14.849	47.56	44.4954	11	20	36.04	26.6055	6	13	18.49	24.7706	6	7	26.65	28.4404	6	10	24.97	37.6147	9	11	1	1	1	1	1	5	WTSP	Atlas only
544163652	ribosomal protein L22 (chloroplast) [Solanum lycopersicum]	ATCG00810	MLKKKKTEVYALGEHISMSADKARRVIDQIRGRSYEETLMILELMPYRACYPILKLVYSAAANASYNMGSSETNLVISKAEVNEGTTVKKLKPRARGRSFPIKRSTCHITIVMKDISLDDEYGEMSSLKKTRWKKKSTAMTYRDMYNSGGLWDKK	0	45.95	0	20.6452	3	7	3	4.995	29.24	20.6452	3	7	NA	0	NA	NA	NA	0	NA	NA	NA	0	NA	NA	NA	0	NA	NA	0	0	0	0	1	1	WTSP	Atlas only
544163653	ribosomal protein S19 (chloroplast) [Solanum lycopersicum]	ATCG00820	MTRSLKKNPFVANHLLKKIDKLNTKAEKEIIVTWSRASTIIPTMIGHTIAIHNGKEHLPIYITDSMVGHKLGEFAPTLNFRGHAKSDNRSRR	0	67.018	0	69.5652	6	56	6	999	65.2	60.8696	5	21	33.57	47.8261	3	10	15.59	44.5652	4	6	12.59	59.7826	4	6	32.57	69.5652	6	13	1	1	1	1	1	5	WTSP	Atlas only
544163654	ribosomal protein L2 (chloroplast) [Solanum lycopersicum]	ATCG01310	MAIHLYKTSTPSTRNGTVDSQVKSNPRNNLIYGQRRCGKGRNARGIITARHRGGGHKRLYRKIDFRRNEKDIYGRIVTIEYDPNRNAYICLIHYGDGEKRYILHPRGAIIGDTIVSGTEVPIKMGNALPLTDMPLGTAIHNIEITLGKGGQLARAAGAVAKLIAKEGKSATLKLPSGEVRLISKNCSATVGQVGNVGVNQKSLGRAGSKRWLGKRPVVRGVVMNPVDHPHGGGEGRAPIGRKKPTTPWGYPALGRRSRKRNKYSDNLILRRRSK	0	55.98	0	27.0073	7	40	6	5.494	74.22	27.0073	7	25	11.52	17.8832	4	4	2.2	5.10949	1	1	7.13	11.3139	2	3	21.37	21.1679	4	7	1	1	1	1	1	5	WTSP	Atlas only
544163660	ribosomal protein S12 (chloroplast) [Solanum lycopersicum]	ATCG00065	MPTIKQLIRNTRQPIRNVTKSPALRGCPQRRGTCTRVYTITPKKPNSALRKVARVRLTSGFEITAYIPGIGHNSQEHSVVLVRGGRVKDLPGVRYHIVRGTLDAVGVKDRQQGRSKYGVKKPK	0.011	2.344	15	7.31707	1	1	1	0.778	2.35	7.31707	1	1	NA	0	NA	NA	NA	0	NA	NA	NA	0	NA	NA	NA	0	NA	NA	0	0	0	0	1	1	WTSP	Atlas only
544163662	ribosomal protein L32 (chloroplast) [Solanum lycopersicum]	ATCG01020	MAVPKKRTSTSKKRIRKNIWKRKGYWVALKAFSLAKSLSTGNSKSFFVRQTKINK	0.01	2.401	14	14.5455	1	3	1	1.154	7.6	14.5455	1	3	NA	0	NA	NA	NA	0	NA	NA	NA	0	NA	NA	NA	0	NA	NA	0	0	0	0	1	1	WTSP	Atlas only
544163665	photosystem I subunit VII (chloroplast) [Solanum lycopersicum]	ATCG01060	MSHSVKIYDTCIGCTQCVRACPTDVLEMIPWDGCKAKQIASAPRTEDCVGCKRCESACPTDFLSVRVYLWHETTRSMGLAY	0	6.047	0	11.1111	1	10	1	0.778	2.12	11.1111	1	1	6.98	11.1111	1	3	2.27	11.1111	1	1	6.77	11.1111	1	3	2.58	11.1111	1	2	1	1	1	1	1	5	WTSP	Atlas only
544163668	NADH-plastoquinone oxidoreductase subunit I (chloroplast) [Solanum lycopersicum]	ATCG01090	MLPMITEFINYGQQTIRAARYIGQGFMITLSHANRLPVTIQYPYEKLITSERFRGRIHFEFDKCIACEVCVRVCPIDLPVVDWKLETDIRKKRLLNYSIDFGICIFCGNCVEYCPTNCLSMTEEYELSTYDRHELNYNQIALGRLPMSVIDDYTIRTISNLPQINNE	0	22.851	0	29.9401	4	20	3	2.162	12.96	22.7545	3	4	9.63	15.5689	2	3	17.74	29.9401	4	6	5.7	16.1677	2	3	11.76	29.9401	4	4	1	1	1	1	1	5	WTSP	Atlas only
544163670	NADH-plastoquinone oxidoreductase subunit 7 (chloroplast) [Solanum lycopersicum]	ATCG01100	MTAPTTRKDLMIVNMGPQHPSMHGVLRLIVTLDGEDVVDCEPILGYLHRGMEKIAENRTIIQYLPYVTRWDYLATMFTEAITINGPEQLGNIQVPKRASYIRVIMLELSRIASHLLWLGPFMADIGAQTPFFYIFRERELIYDLFEAATGMRMMHNYFRIGGVAADLPYGWIDKCLDFCDYFLTGVAEYQKLITRNPIFLERVEGVGIIGRDEALNWGLSGPMLRASGIEWDLRKVDHYESYDEFDWQVQWQREGDSLARYLVRIGEMTESIKIIQQALEGIPGGPYENLEMRRFDRLKDPEWNDFEYRFISKKPSPTFELSKQELYVRVEAPKGELGIFLIGDQSVFPWRWKIRPPGFINLQILPQLVKRMKLADIMTILGSIDIIMGEVDR	0	58.719	0	29.771	11	47	11	9	24.58	23.1552	8	11	26.05	23.6641	8	11	35.74	23.6641	8	12	22.74	15.7761	4	7	18.16	20.6107	6	6	1	1	1	1	1	5	WTSP	Atlas only
544163671	ribosomal protein S15 (chloroplast) [Solanum lycopersicum]	ATCG01120	MVKNSVISVISQEEKKGSVEFQVFNFTNKIRRLTSHLELHKKDYLSQRGLKKILGKRQRLLAYLAKKNRVRYKELINRLDIRETKTR	0	40.39	0	57.4713	10	26	10	629.957	31.36	50.5747	8	12	25.63	41.3793	5	9	2.98	13.7931	1	1	1.78	13.7931	1	1	7.65	29.8851	3	3	1	1	1	1	1	5	WTSP	Atlas only
544163674	ribosomal protein S7 (chloroplast) [Solanum lycopersicum]	ATCG00900	MSRRGTAEKKTAKSDPIYRNRLVNMLVNRILKHGKKSLAYQIIYRAVKKIQQKTETNPLSVLRQAIRGVTPDITVKARRVGGSTHQVPIEIGSTQGKALAIRWLLAASRKRPGRNMAFKLSSELVDAAKGSGDAIRKKEETHRMAEANRAFAHFR	0	45.141	0	42.5806	8	32	7	9	43.91	37.4194	7	15	20.98	35.4839	6	7	5.72	23.871	3	3	1.99	5.16129	1	1	15.52	41.2903	6	6	1	1	1	1	1	5	WTSP	Atlas only
544163678	ribosomal protein L23 (chloroplast) [Solanum lycopersicum]	ATCG01300	MDGIKYAVFTDKSIRLLGKNQYTSNVESGSTRTEIKHWVELFFGVKVIAMNSHRLPGKSRRMGPIMGHTMHYRRMIITLQPGYSIPPLRKKRT	0	43.095	0	49.4624	5	19	5	145.78	48.54	49.4624	5	18	NA	0	NA	NA	NA	0	NA	NA	NA	0	NA	NA	2.26	12.9032	1	1	1	0	0	0	1	2	WTSP	Atlas only
Solyc00g007270	Translation initiation factor IPR002769 Translation initiation factor IF6	no hits	MATRLQFENSCEIGVFSKLTNAYCLVAIGGSENFYSTFESELSGIIPVIKTSIGGTRIIGRLCAGNKNGLLLPHTTTDQELQHLRNSLPDGVVVQRIDERLSALGNCIACNDHVALTHTDLDKETEEMIADVLGVEVFRQTIAGNILVGSYCAISNTGGLVHPHTSIEDLDELSTLLQVPLVAGTVNRGSEVIGAGLTVNDWTAFTGSDTTATELSVIESVFKLREAQPTAIVDEMRKSLIDSYV	0	6.618	0	9.38776	2	6	2	0.931	NA	0	NA	NA	2.94	4.89796	1	1	5.04	9.38776	2	2	2.74	4.89796	1	1	5.16	9.38776	2	2	1	1	1	1	0	4	CIP	ITAG only
Solyc00g009020	Mitochondrial ATP synthase	AT2G21870	MALASRLLSRSTRQLCAGQVVLRPEHAVPIRSFAKEAAAPTTLKGDQVLKDIFYEVKNKLETAIGVLRKEKITIDPEDPAAVSEYAKVMKSVRQKANLLSESEIIKFNIEVETHEIPDARTYLLKLKEMRVKRGLIDSQGIEDLQMAALDKVEKELKKPLLRNNEKGIALLKAEFDKINQKLGIRKEEMPKYEEQLELKIAKAQLEELKKDALEAMETQKKREEFKDEEMPTVKSLDIRNFI	0	11.328	0	10.7438	3	6	3	0.585	2.94	6.61157	1	1	2.65	7.43802	1	1	1.8	3.30579	1	1	4.98	9.91736	2	2	3.14	6.61157	1	1	1	1	1	1	1	5	CIP	ITAG only
Solyc00g011880	AIG2-like protein (AHRD V1 ***- B4FVZ7_MAIZE); contains Interpro domain(s) IPR009288 AIG2-like	no hits	MASASNPQSLFNVFVYGSLLADDVVIALLKRVPSSSPAILHNFHRFSIKGRVYPAILPVENKKVNGKVLSGITIPELDILDKFEDVEYERKTVDVSLTDSSDTLMVEAYIWADQSDPNLFGEWDFEEWERLHKQSFMKMTMEFLEELEQPNQSGSI	0	15.659	0	16.6667	3	13	3	9	3.47	16.6667	2	2	6.17	16.6667	2	2	9.4	16.6667	3	5	4.16	16.6667	3	3	3.36	9.61538	1	1	1	1	1	1	1	5	CIP	Detected by both ITAG and Atlas
Solyc00g011880	AIG2-like protein IPR009288 AIG2-like	no hits	MASASNPQSLFNVFVYGSLLADDVVIALLKRVPSSSPAILHNFHRFSIKGRVYPAILPVENKKVNGKVLSGITIPELDILDKFEDVEYERKTVDVSLTDSSDTLMVEAYIWADQSDPNLFGEWDFEEWERLHKQSFMKMTMEFLEELEQPNQSGSI	0	17.845	0	16.6667	3	12	2	9	3.47	16.6667	2	2	6.17	16.6667	2	2	9.4	16.6667	3	5	4.16	16.6667	2	2	3.36	9.61538	1	1	1	1	1	1	1	5	CIP	Detected by both ITAG and Atlas
Solyc00g012690	Ovarian tumour otubain (AHRD V1 ***- Q1SL15_MEDTR); contains Interpro domain(s) IPR018289 MULE transposase, conserved domain	no hits	MPMFEVVGVTSTDLTYSVGFGFMTHEKEENFVWVLKMLCKLLSSKMNMPKVIVTDRDMSLMKAVAHVFPESYAMNCYFHVQANVKQRCVLDCKYPLGFKKDEKEVSNHDVVKKIMKAWKAMVESPTQQLYANALVEFKDSCSDFPIFVDYAMTTLNEVKDKIVRAWTDHVLHLGCRTTNRVESAHFTAIQTSFGHSLCVLEHRFKDVTLYSGLGGHESRYALDNIVLEETRCRETLCMDNDICGYVQRTSYGLPCACEIATKLLQEKPILLDEIYHHWLRLSMGEESNEVAFCVEVELKAIVERLKKLPFQMKLEVKEGLRQLAFPETTLMSPPPRKVPTKGAKKKVDIARSKGKITSTSQIPSSWEVVDSQNLDSQPSPSPTTSSYKRKKGARLGKIS…	0.013	2.299	17	1.64918	1	1	1	0.08	NA	0	NA	NA	0	1.64918	1	1	NA	0	NA	NA	NA	0	NA	NA	NA	0	NA	NA	0	0	0	1	0	1	1 PSM	Atlas only
Solyc00g017210	Actin (AHRD V1 ***- P93775_STRAF); contains Interpro domain(s) IPR004000 Actin/actin-like	AT2G37620	MKYRTGKQGEPKSKPLDPFLYLLLPFPSPSILPSSSSLLLLPLFHFPATTNFSISTFFPLDFRWLMVKTFNLLFATMELEWLRCAGFAGDDAPRAVFPSIVGRPRHTGVMVGMGQKDAYVGDEAQSKRGILTLKYPIEHGIVNNWDDMEKIWHHTFYNELRVAPEEHPILLTEAPLNPKANREKMTQIMFETFNAPAMYVAIQAVLSLYASGRTTGIVLDSGDGVSHTVPIYEGYALPHAILRLDLAGRDLTDALMKILTERGYSFTTTAEREIVRDIKEKLCYIALDYEQELETAKTSSSVEKNYELPDGQVITIGSERFRCPEVLYQPSMIGMENAGIHETTYNSIMKCDVDIRKDLYGNIVLSGGTTMFPGIADRMSKEITALAPSSMKIKVVAPP…	0	17.321	0	12.4717	5	15	5	0.833	5.24	4.98866	2	2	15.95	12.4717	5	6	4.95	2.49433	1	2	7.83	4.98866	2	4	3.08	2.49433	1	1	1	1	1	1	1	5	CIP	Atlas only
Solyc00g071180	Cysteine proteinase inhibitor IPR000010 Proteinase inhibitor I25, cystatin	no hits	MANVGGLVDVPFQNKVEFDDLARFAVKDYNQKNGSSLEFEKVLKVKKQIVAGIMYYITFEGTEGGKKKEYENAHLEFVEVLNVKEQVVSGMMYYITLVATDDGNKKDYEAKIWVKEWEDFKKVISFKLVGKDSAIIGGFTDVPFPNKPNIWVKEWEHFIKVVEFKPVSDDSVKTGDIVDVPDPNIPPLQDLARFAVQDYNKAQNAHLEYVENLNVKEQLVAGTLYYITLVATDAGKKKIYETKIWVKEWEDFKKVVEFKLVGDDSPNPGGITNVPFPNLPEFKDLARFAVQDYNKKENAHLEFVENLNVKEQVVAGIIYYITLVATDAGKKKIYETKILVKGWENFKEVXX	0	78.021	0	34.4729	14	83	14	33.551	52.08	31.339	11	20	128.64	34.4729	14	47	35.01	14.245	5	12	10.66	8.83191	2	3	2.61	2.5641	1	1	1	1	1	1	1	5	CIP	ITAG only
Solyc00g096460	AT4G08310 protein (Fragment)	no hits	MEVNEEKPVMEVKIEEALRSRIQHFKDNADSFTLERVRRLIEEDLELEKYALDVHKRFIKQILEKVMLLFLSL	0.003	2.732	7	13.6986	1	1	1	0.468	NA	0	NA	NA	NA	0	NA	NA	NA	0	NA	NA	1.99	13.6986	1	1	NA	0	NA	NA	0	1	0	0	0	1	1 PSM	ITAG only
Solyc00g164680	ABC transporter G family member 11 IPR013525 ABC-2 type transporter	AT1G17840	MFFRTNGFPCPLLQNPSDHFLKTINKDFDEDIEHGLAGRKPTEEVVDFLINSYESSDEYHEVQNQVAEICQQGGEMLEKRSHANFFTQSLVLTRRSSLNMFRDLGYYWMRFVSYVILALGLGTIYYNVDLSYRSIEERGLMVAFVVSFMTFMTVGGFPSFVEDMKVFQRENLNGHYGSSAFVIGNTVSSMPYLLLISLVPGSIAYFLTGFQPGFERFIYFALVLFISMMIVESLMTNVAAIVPNFLMGIVVGAGIQGLMILSGGFFQIPNELPKIIWKYPLYYISFHRYAYQGMFKNEFEGLFFTDNVNGINVTMSGEDVLREKWQVEMGYSKWVDLAILVVILILHRMVFFLIVKTNEIFVHARKTSTSVSLYLEIIEFSLYSLIPSQTHTEMALTAA…	0.049	1.417	122	1.42857	1	1	1	0.166	NA	0	NA	NA	NA	0	NA	NA	NA	0	NA	NA	NA	0	NA	NA	2.11	1.42857	1	1	1	0	0	0	0	1	1 PSM	ITAG only
Solyc00g174340	Pathogenesis-related protein 1b IPR018244 Allergen V5_Tpx-1 related, conserved site	no hits	MGLFNISLLLTCLMVLAIFHSCEAQNSPQDYLAVHNDARAQVGVGPMSWDANLASRAQNYANSRAGDCNLIHSGAGENLAKGGGDFTGRAAVQLWVSERPSYNYATNQCVGGKKCRHYTQVVWRNSVRLGCGRARCNNGWWFISCNYDPVGNWIGQRPY	0.043	1.464	106	5.03145	1	1	1	0.585	NA	0	NA	NA	NA	0	NA	NA	1.92	5.03145	1	1	NA	0	NA	NA	NA	0	NA	NA	0	0	1	0	0	1	1 PSM	ITAG only
Solyc01g005240	Aspartokinase (AHRD V1 ***- B9RGY9_RICCO); contains Interpro domain(s) IPR001341 Aspartate kinase region	AT5G14060	MATLSHFSGVKTPCPSIFKRSVHFPQLDFVATVPFVSAPSKSVKVSCCERVQRLVCKAQATDVNRKETKNESFGEAPDELTCVMKFGGSSVASAERMREVADLILSFPEERPVIVLSAMGKTTNNLLLAGEKAQSCGVSNVSDLQELAFIKELHLRTIDELGVESSTISKHLLELEQLLNGIALMKELTPRAKDYLVSFGECMSTRIFSAYLNKLGVKARQYDAFEMGIITTDDFTNADILEATYPAVAKRLTGDWMSNPAIPIVTGFLGKGWRTCAVTTLGRGGSDLTATTIGKALGLREIQVWKDVDGVLTCDPNIYPRAETVPYLTFDEAAELAYFGAQVLHPQSMRPAREGDIPVRVKNSYNPKAPGTLIVKTRDMSKAVLTSIVLKRNVTMLDI…	0	47.689	0	20.177	10	26	10	1.555	26.36	14.5133	7	9	17.64	8.84956	4	5	17.83	12.3894	6	6	9.28	8.14159	4	4	3.72	2.83186	2	2	1	1	1	1	1	5	WTSP	Detected by both ITAG and Atlas
Solyc01g005250	Aspartate-semialdehyde dehydrogenase (AHRD V1 ***- B6TWW1_MAIZE); contains Interpro domain(s) IPR005986 Aspartate-semialdehyde dehydrogenase, bacterial	AT1G14810	MNTPALSLRHNHFLNGSSALVSGIRLPRSSSSPFRVRMSLQENGPSVAVVGVTGAVGQEFLSVLSDRNFPYRSLKLLASKRSAGKSMKFEERDYTVEELTEDSFDGIDIALFSAGGSISKKFGPLAAQKGTIVVDNSSAFRMDENVPLVIPEVNPEAMAHVKLGSGKGALIANPNCSTIICLMAVTPLHRRAKVKRMVVSTYQAASGAGAAAMEELVQQTREVLEGKEPTCNIFNQQYAFNLFSHNAPVQPNGYNEEEMKLVKETRKIWSDKDVKVTATCIRVPVMRAHAESVNLQFENPLDENTARDILKNAPGIVVVDDRASNRFPTPLEVSNKDDVAVGRVRRDVSQDGDYGLDIFVCGDQIRKGAALNAIQIAEMLL	0	35.925	0	16.5354	7	36	7	7.111	22.29	14.4357	5	6	19.43	16.5354	6	6	27.62	11.5486	4	8	19.51	11.5486	4	6	31.66	13.6483	6	10	1	1	1	1	1	5	WTSP	Detected by both ITAG and Atlas
Solyc01g005380	SET domain containing protein (AHRD V1 ***- B6U0H4_MAIZE); contains Interpro domain(s) IPR001214 SET	AT1G24610	MSSKMMLMANSLTHVRPLTCAAAAVYPSRLVAQPPDLIKWVKTEGGFVHKSIKVAQGDTFGLGLVASEDIPKGSDLIALPQHIPLKFDGSTSESENSHSALIKLAQHVPEELWAMKLGLKLLQERARKGSFWWPYISNLPETYSVPIFFPGEDIKNLQYAPLLYQVNKRCRFLLDFEKILKHELENLKPDDHPFSGQDVDSSALGWAMSAVSSRAFRLYGGKRPDGTRSNVPMMLPLIDMCNHSFDPNAEIVQEEANTNRNMLVKMVAGREIKQNDPLLLNYGCLSSDLFLLDYGFVIPSNPYDCIELKYDAALLDAASMAAGFTSPNFSSPSPWQQQILSHLNLDGPNSDLKVTLGGGELVEGRLLAALRVVLSNDEEAVKQHDLETLKSLTVEAPLG…	0	58.156	0	30.1486	11	33	11	5.661	28.5	23.3546	8	9	29.37	19.3206	7	10	16	14.6497	6	6	7.83	7.00637	3	3	11.81	15.9236	5	5	1	1	1	1	1	5	WTSP	Detected by both ITAG and Atlas
Solyc01g005490	Iaa-amino acid hydrolase 4 IPR017439 Peptidase M20D, mername-AA028_carboxypeptidase Ss1	AT5G54140	MGSLSTNLFFFLCIFLLVLTSFPYNSWSVEETLLRSETELLAHELFESAKQPEFFNWLKRVRRRIHEYPELAFEEYKTSQLIRDELDLMGIEYVSPVAKTGLVGIVGSGHQPSFGLRADMDALPMQELVDSEYKSKINGKMHACGHDAHVTMLLGAARLLQNRRDKLKGTVKLVFQPAEEGYAGASYMIEEGALDGVKAIFGMHVWPFTPTGIIGSRPGPIMAGAGRFTAIIQGKGGHAATPHRTKDPILAVSMTVLALQQLVSRETDPLESRVVSVAFVDGGEAGNVIPEGVKFGGTFRFLTFEGHSYLKQRIKEIIETQASVHQCSATVDFAEDLMRPYPPTVNDPTMYKHAKEVGEVMLGEENVQYGAITMGAEDFSFYSQKIPAAFVIIGAQNKT…	0.002	3.245	5	2.50569	1	1	1	0.166	NA	0	NA	NA	2.75	2.50569	1	1	NA	0	NA	NA	NA	0	NA	NA	NA	0	NA	NA	0	0	0	1	0	1	1 PSM	ITAG only
Solyc01g005520	Tetratricopeptide TPR_2 repeat protein (AHRD V1 *--- A8ZVN6_DESOH); contains Interpro domain(s) IPR001478 PDZ/DHR/GLGF	AT1G55480	MASTISYTSLCSLLKLNQTNQKTPFSPSLSSPSSPSSLVKIKNQLCFSSNFCSHLNKASIFMVKASETEATQSEKEEEDKYEEYEVEIIQPYGLKFTKGRDGGTYIDAIAPGGFADKTGKFAVGDKVIATSAVFGEEIWPAAEYGRTMYTIRQRIGPLLMKMQKRYGKVEEVGELTEKEIIRAERNAGFISDRVREIQVTNARRKKEQKEQRERELREGLKLSKNGKYEEALEKFESVLGSRPTGDELAVASYNVACCYSKLNQLQAGLSALKDAMEAGFEDFKRIRTDPDLANLRTSEDFETLMKKFDESFINENAINAIKSLFGFNKK	0	101.202	0	37.2727	17	79	17	16.302	47.37	30	11	16	61.05	34.5455	13	23	45.37	32.4242	10	16	32.12	23.3333	7	11	32.59	27.2727	10	13	1	1	1	1	1	5	WTSP	Detected by both ITAG and Atlas
Solyc01g005540	Lysyl-tRNA synthetase (AHRD V1 ***- B9SBP3_RICCO); contains Interpro domain(s) IPR002313 Lysyl-tRNA synthetase, class II	AT3G13490	MEALQPLKQLIHFTSLRFRPSSSSFFIVRCCSSTTTEVTGRAAGGGRNRRSSSGTSTSTSDKEAIRAIRIKKVEELRSNGLEPYAYKWDRTHSASQLQEIYKNLGNGEESKSENDYVSISGRIVARRAFGKLAFLTLRDDSGMIQLYCEKERLLSDQFDQLKTLVDIGDILGANGSIKRTEKGELSVCVNSFSILTKSLLPLPDKYHGLTDIDKRYRQRYVDMIANPEVADTFRKRAKIVSEIRQSVESFGFLEVETPVLQGAAGGAEARPFITFHNSLGRDLYLRIATELHLKRMLVGGFEKVYEIGRIFRNEGISTRHNPEFTTIEMYEAYSDYESMMNMAEEIVTRCALAVNGKLKIDYQGVEICLERPWRRETMHNLVKEATGIDFKNFEDDLKA…	0	46.398	0	21.2329	11	33	11	1.297	34.03	17.9795	9	12	19.6	13.0137	6	7	11.35	9.07534	4	4	13.65	7.87671	4	5	13.06	9.41781	5	5	1	1	1	1	1	5	WTSP	Detected by both ITAG and Atlas
Solyc01g005560	Isocitrate dehydrogenase IPR004790 Isocitrate dehydrogenase NADP-dependent, eukaryotic	AT1G65930	MAFQKIIVQNPIVEMDGDEMTRVIWKSIKDKLILPFLELDIKYFDLGLPHRDATDDKVTIESAEATQKYNVAIKCATITPDEARVKEFNLKSMWRSPNGTIRNILNGTVFREPIMCKNIPRLVPGWTKPICIGRHAFGDQYRATDTVIKGAGKLKLVFVPEGSDEKTEFEVYNFTGAGGVALSMYNTDESVRAFAEASMNMAFQKKWPLYLSTKNTILKKYDGRFKDIFQEVYEANWKSKYEEAGIWYEHRLIDDMVAYALKSEGGYVWACKNYDGDVQSDFLAQGFGSLGLMTSVLVCPDGKTIEAEAAHGTVTRHYRVHQKGGETSTNSIASIFAWTRGLAHRATLDNNERLLDFTEKLEAACIGAVESGKMTKDLALIIHGSKLSREHYLNTEEFI…	0	44.063	0	21.9277	8	31	3	1.649	17.58	16.1446	5	6	19.27	18.7952	6	7	16.22	16.1446	5	6	18.01	14.4578	6	8	14.77	11.3253	3	4	1	1	1	1	1	5	CIP	ITAG only
Solyc01g005820	Splicing factor arginine_serine-rich 4 IPR012677 Nucleotide-binding, alpha-beta plait	AT3G13570	MRRRSYSPSPPRGYGRRGRSPSPRGRYAGHGRDGPTSLLVRNLRHDCRPEDLRRPFGQFGPVKDIYLPKDYYTGEPRGFGFVQFVDPADAADAKYQMDGQGFQGRQLTVVFAEENRKKPTEMRSRERSGSHRSSRSYDRRRTPPSRYARPGSHSRDYSPKRRPYSRSVSPEEKRYSRERSYSRSPPRDLSPPPHNGSRSRSQTPVREHPPYNGSPRSRSRSPVRRERSPVRGHSRSPSRSRSRSPGCAPYSP	0.002	3.436	4	4.36508	1	1	1	0.145	NA	0	NA	NA	NA	0	NA	NA	NA	0	NA	NA	2.41	4.36508	1	1	NA	0	NA	NA	0	1	0	0	0	1	1 PSM	ITAG only
Solyc01g005990	Non-specific lipid-transfer protein IPR003612 Plant lipid transfer protein_seed storage_trypsin-alpha amylase inhibitor	AT3G58550	MSSKKLVTFELSFFFLILLLGFSSANLDKDREECANQLVGLATCLPYVSGEAKSPTPDCCTGLKEVLDKSKICLCILVKDRNDPSLGLKINATLALSLPTLCHAPPNMSNVSMCPELLHLAPNSPDAKVFQDFAKSAKGSSAAPSAPVSGNSSGKPANSSTNDKNDGGHKRRWMGFVEMTMGFLVILMLSYLT	0.054	1.348	138	3.62694	1	2	1	0.585	1.64	3.62694	1	1	1.73	3.62694	1	1	NA	0	NA	NA	NA	0	NA	NA	NA	0	NA	NA	0	0	0	1	1	2	1 Peptide	ITAG only
Solyc01g006020	At3g32930-like protein (Fragment) (AHRD V1 *-*- B3SKU7_ARAHA)	AT3G32930	MILQTTINSFTFSSQPISRNSLFFKNLTFFTSPLLPKSFLPSLDYRFYLGNKRSSLSVSSAKTGSKTIHATLLEAPVLWAGRVCVFYALLKAGLAGSPSNPLVSDLENDGNAELGFAKWFEELQSKPEKEATNRRKLVSKWHPTTKGTLRRNYRVPSKPEGKRLLKSIASLLSDDDHFRDATSHKGCQIRRESAHGESVCCNNVRALFDELPTPHLIVEITPFPAGPLTDTDYAKAEKLERVLRSGPSV	0	7.789	0	9.63855	2	6	2	0.425	4	5.22088	1	1	3.36	5.22088	1	1	3.52	9.63855	2	2	3.14	5.22088	1	1	3.75	5.22088	1	1	1	1	1	1	1	5	WTSP	Detected by both ITAG and Atlas
Solyc01g006290	Peroxidase IPR002016 Haem peroxidase, plant_fungal_bacterial	AT2G38390	MSFLRFILAIFFLVSINFGVSNAHYKLTPTFYDCTCPNVIHIVRDVMEQIQRRDVRAGAKIIRLHFHDCFVNGCDGSILLNNATGIISEKDANPNVGAGGFDIVDEIKTALENECPGVVSCADILALASEIGVVLAGGPSWQVPLGRRDSLTANRSGANSDIPSPTETLAVMIPQFTRKGMDLTDLVALSGAHTFGRARCRTFNQRLFNFSGSGRPDPTIDSNYLKTLQRLCPQGGNGGTFANLDKSTPDEFDNYYFTNLKNHQGLLQTDQELFSTSGSSTISIVTNYANNQHKFFDDFVCSMIKLGNISPLTGTNGEIRKDCKRIN	0.014	1.875	34	5.50459	1	1	0	0.334	NA	0	NA	NA	NA	0	NA	NA	NA	0	NA	NA	2.74	5.50459	1	1	NA	0	NA	NA	0	1	0	0	0	1	1 PSM	ITAG only
Solyc01g006300	Peroxidase (AHRD V1 **** Q43774_SOLLC); contains Interpro domain(s) IPR002016 Haem peroxidase, plant/fungal/bacterial	AT2G38390	MSFLRFIFPLFFLISIFVASNAQLSATFYATTCPNVTEIVRGVMQQAQSTDVRAGAKIIRLHFHDCFVNGCDGSLLLDNAAGIESEKDAASNVGAGGFDIVDDIKTALENVCPGVVSCADILALASEIGVALVGGPTWQVLLGRRDSLTANRSGVDSDIPTPFESLDVMRPQFTNKGMDITDLVALSGAHTFGRARCGTFQQRLFNFSGSGSPDPTINSTYLPTLQATCPQGGNNGNTFENLDKTTPDNFDNDYYINLQNQEGLLQTDQELFSTSGSDTIAIVNRYASSQSQFFDDFASSMIKLGNIGVLTGTNGEIRTDCKRVN	0.018	2.044	25	5.53846	1	1	1	0.468	NA	0	NA	NA	NA	0	NA	NA	NA	0	NA	NA	2.74	5.53846	1	1	NA	0	NA	NA	0	1	0	0	0	1	1 PSM	Atlas only
Solyc01g006330	PAP fibrillin family protein IPR006843 PAP fibrillin	AT1G51110	MTTIMEIGNLGVGFRPQIAINSTRKWRCKQFLGQKMQNKKNFLLVCSVASKVCSFSEEENGLIEALIGIQGRGRAASPQQLQEVERAVEVLEGSEGVPEPTSSSLIEGRWQLMFTTRPGSASPIQRTFVGVDSFSVFQEVFLRTNDQRVSNIVKFSEAIGELKVEALATIKDGKRILFQFDRAAFTFKFLPFKVPYPVPFRLLGDEAKGWLDTTYLSPSGNLRISRGNKGTTFVLQRETEPRQKLLSSISTGTRVEKAIDEFISLNQNVVNPELELLEGEWQMIWSSQVETDSWLENAGNGLMGNQIVKPNGQLKFLVGILFGIRFSMTGKYEKSGSNVYDVIMDDGAILAGMYGIPVEMESKFTIEILYTDDKIRISRGYNKILFVHVRVDGSNMKP	0	61.171	0	34.4221	14	65	14	6.079	30.22	22.6131	8	11	56.39	27.8894	11	19	40.99	27.8894	10	14	33.39	23.3668	8	12	24.75	22.1106	8	9	1	1	1	1	1	5	WTSP	ITAG only
Solyc01g006450	Enoyl reductase (AHRD V1 ***- P93062_BRANA); contains Interpro domain(s) IPR014358 Enoyl-[acyl-carrier-protein] reductase (NADH)	AT2G05990	MAASAASSFQITIARPSIFSTKRITSFCSTKFGGETQKLSCNRLASSCHVSSIQHFWRSFTSTTQKFQKVVTKAKSEADDSKPASVLPIDLRGKRAFIAGIADDNGYGWAIAKSLAAAGAEILVGTWVPALNIFETSLRRGKFDESRVLPDGSLMEITKVYPLDAVFDSLEDVPEDIKTNKRYAGSSKWTVSEVAESVKEDFGSIDILVHSLANGPEVTKPLLETSRRGYLAAISASSYSYVSLLKHFLPIMNPGGSSISLTYIASERIIPGYGGGMSSAKAALESDTRVLAFEAGRKQKVRVNTISAGPLRSRAAKAIGFIDMMIDYSIANAPLQRELSADEVGNTAAFLASPLASAITGAVIYVDNGLNAMGVGVDSPIFKDLNIPKSTE	0	39.493	0	24.7449	8	53	4	3.642	32.69	22.7041	7	13	32.68	18.3673	6	13	29.51	21.9388	7	11	30.44	20.1531	6	11	12.71	12.5	4	5	1	1	1	1	1	5	WTSP	Detected by both ITAG and Atlas
Solyc01g006540	Lipoxygenase (AHRD V1 **** Q96573_SOLLC); contains Interpro domain(s) IPR001246 Lipoxygenase, plant	AT3G45140	MLKPQFQQSTKTLIPSWNTNTLFLASFPINILNKNFILKKKNNFRVHHNYNGANTIKAVLNSTQKSIGVKAVVTVQKQVNLNLLRGLDGIGDLLGKSLILWIVAAELDHKTGLEKPSIRSYAHRGLDVDGDTYYEAVFEIPEDFGEVGAILVENEHHKEMYVKNIVIDGFVHGKVEITCNSWVHSKFANPDKRIFFTNKSYLPSQTPSGVIRLREEELVTLRGDGVGERKVFERIYDYDVYNDLGEVDSNNDDAKRPILGGKKLPYPRRCRTGRQRSKKDPLYETRSTFVYVPRDEAFSAVKSLTFSGNTVYSALHAVVPALESVVSDPDLGFPHFPAIDSLFNVGVDLSGLSDKKSSLFNIVPRLIKSISETGKDVLLFESPQLVQRDKFSWFRDVEF…	0	155.054	0	30.5804	27	189	22	7.984	121.62	25.558	20	43	145.68	26.6741	22	53	81.99	24.5536	19	30	81.17	23.1027	19	30	88.92	19.308	17	33	1	1	1	1	1	5	WTSP	Detected by both ITAG and Atlas
Solyc01g006560	Lipoxygenase (AHRD V1 **** C0KKU8_SOLLC); contains Interpro domain(s) IPR001246 Lipoxygenase, plant	AT3G45140	MLKPQLQQSSQSTKTLIPYWKTKPLCLASIPINTLNNKNLRVKKKKNFITKAVVSSTENSSYVQSSNIENSTSGKAIVIVQRTVGGTNLSLTRGLDDIGDLFGRSLFLSIVAAELDPKTGVEKPTIEGFARRGRDVDGNREYEVEFEIPEDFGDVGAILIENQQRKQMYVKNIVIDGFVHGKVEITCNSWVHSKYDNPDKRIFFTNKSYLPSQTPSGVKKLRETELVTLRGDGFGERKIYERIYDYDVYNDIGDPDGDGDGDGKRPVLGGKELPYPRRCRTGRARSEKDPLSESKGDFTYVPRDEAFSEVKDLSFSGNTIYAVLHAVVPGLQSIITDRDLGFPHFPAIDSLYNVEVELPALQTNSLFSIIRRLIRAISETRKDVLLFETPEFLERDKFA…	0	213.223	0	31.7073	31	223	26	16.302	149.93	26.9401	23	50	220.39	30.9313	30	74	105.32	24.8337	21	40	113.96	24.0576	19	43	41.39	10.8647	9	16	1	1	1	1	1	5	WTSP	Detected by both ITAG and Atlas
Solyc01g006600	Non-ribosomal peptide synthetase IPR011614 Catalase, N-terminal	no hits	MLLLLNFLPHKVAMEPRKAIDELFLKFHPCFDTNTKIGIIGGGPSGTSAAYALVKLGYTNITILEKYHSVGGMCESDDIEVSNSRRIDMNSLEEELFGKVQTIDYYTIVLKITGFDHIPMGFYYFGEFMDDPKAIGNPVAMQRFYNDTNVFLFWSYGNSVDIVGLKETELLIKGVESMGGFVEKVVLQRKLKYFPHVNNQDMKEGFYEKVENQLQGQQNTYYVGGLMAFELTERNASYAMALMHKHFASNNPIPAFPYVKIIEFLKELLYEMTEVLKSKISITESLVSYGVDSIGVVRAAQKISNFLGVLVGAIDIFSATCIEDLADFAEDLLRKSHPELVTTTSGSCESKMSSTMVFPTFSSCLCLFHADISCVHIGFHFQIFHFCMPNADTISPLVW…	0.028	1.614	68	1.32774	1	1	1	0.032	2.61	1.32774	1	1	NA	0	NA	NA	NA	0	NA	NA	NA	0	NA	NA	NA	0	NA	NA	0	0	0	0	1	1	1 PSM	ITAG only
Solyc01g006940	Poly(U)-binding-splicing factor PUF60 (AHRD V1 *--* PUF60_BOVIN); contains Interpro domain(s) IPR003954 RNA recognition, region 1	AT3G52380	MSVFSSSSSSSSSLHFFTQKPKFSVVEHISTSINNTHFNFKINNSINPIKSKPHFPISSLLASFSRISTHFSTSAVSDGAGVVGLDEEAELSAEEEIEEDEENEGGESLEKEEDGVVDEPKSIEDGRLYVGNLPFSMTPSQLSEIFAEAGKVANVEIVYDRVTDRSRGFAFVTMGSVEDAKEAVRLFDGSQVGGRTVKVNFPEVPRGGERQVMSAKIRSTYQGFVDSPHKLYVANLSWNLTSQGLKDAFADQPGFLSAKVIYDRASGRSRGFGFITFSSAEAMNNALDTMNEVDLEGRPLRLNIAGQRDPVSSPPVVKTSESENSVIL	0	55.614	0	34.7561	11	91	11	7.577	52.14	28.6585	9	18	39.51	28.3537	8	16	48.09	30.4878	9	18	66.76	30.4878	9	27	33.09	18.9024	5	12	1	1	1	1	1	5	WTSP	Detected by both ITAG and Atlas
Solyc01g006980	Malonyl CoA-acyl carrier protein transacylase containing protein expressed (AHRD V1 ***- Q10MS3_ORYSJ); contains Interpro domain(s) IPR004410 Malonyl CoA-acyl carrier protein transacylase	AT2G30200	MSCSSSLILPSISSNGFRRFSPLKLDKSRVFMSSISVGSQIAAVDDALFADYKPTNAFLFPGQGAQAVGMGAEAQKVPAAAELYKRANEIMGFDLLDICINGPKEKLDSTVLSQPAIYVTSLAAVEILRAREGGQQIIDSVDVTCGLSLGEYTALAFTGAFSFEDGLKLVKLRGEAMQDAADAAKSAMVSIIGLDSDKVQKLCDAANEEVDEANKVQIANFLCPGNYAVSGGVKGIEAVEAKAKSFKARMTVRLAVAGAFHTSFMNPAVSRLEAALSATEIRTPRIPVISNVDAQPHADPDTIKKILASQVTSPVQWETTIKTLLTKGLKKSYELGPGKVIAGIVKRMDRGAEIENIGA	0	93.992	0	28.1337	9	116	9	18.307	93.73	25.6267	8	28	79.15	23.1198	6	23	80.35	26.1838	8	24	72.35	23.1198	6	22	69.36	23.6769	7	19	1	1	1	1	1	5	WTSP	Detected by both ITAG and Atlas
Solyc01g007080	Aluminum-activated malate transporter (Fragment) IPR006214 Uncharacterised protein family UPF0005	AT1G08440	MDIDSKIQEKNSVLNMLWNQLKWFPMKLINKINNIANNTINIGKNDPRKIWHASKVGLSLTLVILFYYSWPLYHSFEQSAIMAVLTVMVAFEYTAGATISKCLNIAFATALGVSLGIGAKYLAEICGKEGEPIILGFLVFILGALGTFTRFYPHMQRRYDYGCMFSVATFSLVTVSGDRYLEMVKYRISTIMVSVATVMVISLVIRPVWAGKDLHNLIIANLEKLASFLDGFESEYFQAIGEGSKDKEKGFLEAFKSVLGSKATEESLANFAWWEPANGPFRFNNPGKEYLKIGNLGRDCACHLHALSGHLKSKSMAPTEFHKRTEEGCKSIIKKSSNALKYLALSIKTRTQPGPYNAKFAIDELRAALLITTKTISEEDTIDVVSVASILIDVTRCVD…	0.032	1.564	79	1.89474	1	1	1	0.101	NA	0	NA	NA	NA	0	NA	NA	NA	0	NA	NA	NA	0	NA	NA	2.3	1.89474	1	1	1	0	0	0	0	1	1 PSM	ITAG only
Solyc01g007740	Peroxiredoxin (AHRD V1 **-- Q9FE12_PHAVU); contains Interpro domain(s) IPR000866 Alkyl hydroperoxide reductase/ Thiol specific antioxidant/ Mal allergen	AT5G06290	MASIVTSTALLSSSNPRVFASASASSALPKLPSFSQSTIVPSSSSFNGLRSCNTSVSRINKSRSFVVRASSEVPLVGNKAPDFEAEAVFDQEFIKVKLSEYIGKKYVILFFYPLDFTFVCPTEITAFSDRYEEFKNVNTEILGVSIDSVFSHLAWVQTDRKTGGLGDLNYPLISDVTKSISKSYNVLIPDQGIALRGLFIIDKEGVIQHSTINNLAIGRSVDETLRTLQALQYVQENPDEVCPAGWKPGDKSMKPDPKGSKEYFASI	0	68.428	0	33.7079	9	107	6	10.938	92.56	29.2135	6	28	98.18	29.588	7	28	70.02	32.9588	7	21	60.55	30.3371	6	19	39.74	23.97	5	11	1	1	1	1	1	5	WTSP	Detected by both ITAG and Atlas
Solyc01g007880	MORN repeat protein (AHRD V1 *--- D4V7H0_BACVU); contains Interpro domain(s) IPR019746 Tubulin/FtsZ, N-terminal	AT1G75010	MDLLLPIPARLSTFSRAAVCTFSPANPFNSNSFTCRKVRFRVSCCTKPVRVETNSNFNRRDGNNCEVNREDDDTGEAGGLKNVWEETEFVEVFGIGSRKDALLEFCLASPYLSPALRFWNVLVKDSEKVLLQEKVPIEDVSSRIVEVPSAINSCSKAVILVASAAYGTDHVPALDIIRKLKSRNGLAVGIILKPFSFEGRRRYDEVTDLIDKLQKHATVCIVIDTDGLLKKDLLTLDEALKTSYNAVLMAVNAISILMSEDHIKLLDATDCGTKELSGPELIKILESYKEAKTGFGAGYNVETSILRAVYDCPFLGLGVKGSNGVVICIIASSGVVNSSDVRSILRTFRQTTGCNGDIVISIVQEANLEPNLIVTTVVTCGYATQEPSEKSSLFSRLAQ…	0	5.925	0	2.94494	2	2	2	0.103	2.49	1.28041	1	1	NA	0	NA	NA	NA	0	NA	NA	2.01	1.66453	1	1	NA	0	NA	NA	0	1	0	0	1	2	WTSP	Detected by both ITAG and Atlas
Solyc01g008070	Alpha/beta superfamily hydrolase (AHRD V1 *--- D0CIF5_9SYNE); contains Interpro domain(s) IPR010765 Protein of unknown function DUF1350	AT5G47860	MNCVTAPKANWRCSPAISFYSDSTKLYNRSSIRFYAGNRNSSRIRCNLKATGSSNNQPETSTGIQLYRDIERLLTETVKQSQDWGSSQDWDEIEGAWVLQPKTSKPKLVVHFIGGVFVGAAPQLSYRLFLERLRQKDVLVIATPYASGFDHFYIADEVQFKFDRCLRFLQERVQDLPVFGIGHSLGSVIHLLIGARYAVKRNGNVLMAFNNKDASLAVPLFSSVLVPMMQNLGPVLSQIASSPTIRLGAEMTMKQIENLSPSIMKQVFPLVEQLTPLYTDLINGKENFTPRPEETQRLIRSYYGISRNLLVKFKDDTIDETSTLAQVLSSGSAISSMLDMSIRTLPGDHALPLQQALPNAPPGMTDAVNRSSELLANLTAGTPWENVTKEVGNTLGNVD…	0	16.995	0	7.17593	3	17	3	3.642	10.09	5.32407	2	5	5.24	5.32407	2	3	11.66	7.17593	3	4	6.81	4.39815	2	3	5.33	4.39815	2	2	1	1	1	1	1	5	WTSP	Detected by both ITAG and Atlas
Solyc01g008100	Transferase transferring glycosyl groups	AT4G14100	MKKSTVSPTSVLFVVAAILISYYSDVSSAKSDSDPTPAPWPHQFHSILFVNFSGSLSLIDLWYDWTNGRNFNIIQDQLGELLYDLEWNNGTVFRYTLDDGKKKCSSALVDVGILRPNWLDGATYLGQQFIDGFHCNVWQKVDFIWYYEDIVTKRPVHWVFYTGRSIHVMTFEVGAVLEDIKWQAPVYCFDKKQVQDHPASDNDILEIGSKGTLREFI	0.002	3.084	5	5.06912	1	1	1	0.468	NA	0	NA	NA	0	5.06912	1	1	NA	0	NA	NA	NA	0	NA	NA	NA	0	NA	NA	0	0	0	1	0	1	1 PSM	ITAG only
Solyc01g008160	Tetratricopeptide repeat-containing protein (AHRD V1 ***- D7L8H9_ARALY); contains Interpro domain(s) IPR011990 Tetratricopeptide-like helical	AT3G18420	MNSTLTIGSSSFFHHSTTFPNSPSRSSIFTIPKTAHKSYSRRFVLQASVNGNSKSNPLISTLKSAGVAVVFAAVALGKFPVGTSLARAETPPAAVMEEQQQQEEEEGSPLTQFLESSPEAIEALKNLLQEKLESGEDEESLKILKKLSSAQPENTEWKFLTARLLNEMGKLEDAREVFEEILSKTPLSFEALFENALLMDRCGEGVKVIQRLEEALRLAEEESKVKESRDIRFIMAQVQFLQKNVEEALRSYDELEKEDPKDFRPYFCRGMIYSLLDRNKEAREQFAKYRELSPKKFEVEGYLRTALSRMKLFGTDEKES	0	32.484	0	16.875	6	13	6	1.404	11.43	8.75	2	3	9.98	8.75	2	4	7.47	8.75	3	3	2.35	2.8125	1	1	5.07	6.875	2	2	1	1	1	1	1	5	WTSP	Detected by both ITAG and Atlas
Solyc01g008250	Thioredoxin X (AHRD V1 ***- B6T9S0_MAIZE); contains Interpro domain(s) IPR015467 Thioredoxin, core	AT1G50320	MATMASVATSTSRISYPMTHSFNTTCNFASPFRSSFSSLAWKKVRFSIGNRGRKLGFRNCSTLRISCGGGLTEIKEDEFSDVVLKSDRPVLVEFVATWCGPCRLIGPAMESVAEEYKEKITVVKIDHDASPKLIEEYKVYGLPTLILFKDGKEVPDSKREGAITKVKLKEYLDGLLKTVSIA	0	49.554	0	33.5165	8	59	8	7.377	36.57	24.7253	5	13	33.3	20.3297	5	11	37.15	29.1209	6	14	26.37	25.8242	5	9	34.68	29.1209	7	12	1	1	1	1	1	5	WTSP	Detected by both ITAG and Atlas
Solyc01g008330	Acetyl-CoA carboxylase biotin carboxylase (AHRD V1 ***- B4VQU4_9CYAN); contains Interpro domain(s) IPR004549 Acetyl-CoA carboxylase, biotin carboxylase	AT5G35360	MDSAAMTSVCGKSALCSTPGLFLGRTNGIRSSQCSFIAGNRINFPRQTAQAHRVRTNSRKGHGALTVTCRAEKILVANRGEIAVRVIRTAHEMGIPCVAVYSTIDKDALHVKLADESVCIGEAPSNQSYLVIPNVLSAAISRGCTMLHPGYGFLSENASFVEMCREHGINFIGPNPDSIRVMGDKATARDTMKNAGVPTVPGSDGLLQSTEEGVKLAEEIGYPVMIKATAGGGGRGMRLAKEPNEFVKLLQQAKSEAAAAFGNDGVYLEKYIVNPRHIEFQVLADKYGNVVHFGERDCSIQRRNQKLLEEAPSPALTPELRKAMGDAAVAAAASIGYIGVGTIEFLLDERGSFYFMEMNTRIQVEHPVTEMISSVDLIEEQIRVAMGEKLRYKQEDIVL…	0	102.986	0	37.8731	20	104	20	6.055	85.6	36.3806	17	31	68.07	34.5149	16	25	54.47	25.3731	12	19	40.21	18.6567	9	14	41.73	23.8806	11	15	1	1	1	1	1	5	WTSP	Detected by both ITAG and Atlas
Solyc01g008550	Cinnamoyl CoA reductase-like protein-binding domain	AT5G19440	MAMRTVCVTGASGYIASWLVKFLLQRGYTVKATVRDLNDQKKVDHLTSLDGAKERLHLFKADLLEEGSFDAVVEGCEGVFHTASPFYLGVKDPQVEMIDPALKGTLNVLGSVAKTPSVRRVVLTSSVAAVAFNGKPRTPEVVVDETWWSDPDFCRESQLWYVLSKTLAEDAAWKFVKEKAFDMVTINPAMVIGGLLQPTLNTSAAAILQLLNGSETYPNSTFGWVNVKDVALAHILAFENPSANGRYLMVESVAHYSEIVKILRELYPTLKLPEKCADDKPFTPTYQVNVERAKKLGIEFIPLAESVKETAESLKEKKFY	0.004	2.233	10	3.75	1	2	1	0.179	NA	0	NA	NA	NA	0	NA	NA	3.64	3.75	1	1	3.29	3.75	1	1	NA	0	NA	NA	0	1	1	0	0	2	Sporadic	ITAG only
Solyc01g008920	NAD dependent epimerase/dehydratase family protein expressed (AHRD V1 **-- Q10L97_ORYSJ); contains Interpro domain(s) IPR013120 Male sterility, NAD-binding	AT4G31530	MASKISVSPFWNLPISTQKTQIFTQFPLLQHFTSSSRFNSSKLKSISYKSISLSAAVTEESQTSPPASSSPVSSSKLVLVVGGSGGVGQIVVASLLNRNVKLRLILRDPEKATTLFGEQDEEKLQVWKGDTRSPTGIDPSVFEGVTHVICCTGTTAFPSRRWDGDNTPERVDWDGVRNLVSALPKSLKRIVLVSSIGVTKFNELPWSIMNLFGVLKYKKMGEDFVRNSGLPFTIIRAGRLTDGPYTSYDLNTLLQATAGERRAVLIGQGDKLVGEVSRLVVAEACIQALDIDFTEGQTYEVNSIPGDGPGTDTLKWQELFRASHSN	0	36.19	0	24.8466	10	37	10	5.813	20.33	22.3926	8	10	14.6	18.7117	6	6	14.54	11.3497	5	8	18.46	12.2699	5	8	10.72	11.3497	4	5	1	1	1	1	1	5	WTSP	Detected by both ITAG and Atlas
Solyc01g008930	Phycoerythrobilin ferredoxin oxidoreductase (AHRD V1 **** Q6E5A3_MAIZE); contains Interpro domain(s) IPR009249 Ferredoxin-dependent bilin reductase	AT3G09150	MECFSSLGWFCISNPSFIGLKSKKKYSLSRKCRSFNEVGSKCVSMSYTENESSGVSYKKLIHFALEETNTHTLLSPSPLQEKYSSLLSMDDKTELQMLSFEAHKIRLLRSLCIEGSDGMQVLDFAAFPKPEFDLPIFCANFFTTAKMNIIVLDLNPLHDIMDQEDYKEKYYKDLITLGLKYSKLLPWGGKLTSESLRFFSPIVIWTRFSSSPHNHSVLFSAFKDYYQAWLGLMDRSEGETDASQIACNCEAQHRYLTWRSEKDPGHGVLKRLIGEDLAKDVITKFLFNGVNELGNKTFLDYFPEYRCEDGKVNEKRSMIGKSFENRPWNARGEFIGDRVEIV	0	6.583	0	8.47953	3	4	3	0.54	6.79	8.47953	3	4	NA	0	NA	NA	NA	0	NA	NA	NA	0	NA	NA	NA	0	NA	NA	0	0	0	0	1	1	WTSP	Detected by both ITAG and Atlas
Solyc01g008950	Calmodulin 5_6_7_8-like protein IPR011992 EF-Hand type	AT3G43810	MADQLTEDQISEFKEAFSLFDKDGDGCITTKELGTVMRSLGQNPTEAELQDMINEVDADGNGTIDFPEFLNLMARKMKDTDSEEELKEAFRVFDKDQNGFISAAELRHVMTNLGEKLTDEEVDEMIREADVDGDGQINYDEFVKVMMAK	0	13.004	0	26.1745	3	7	0	1.154	4.82	16.1074	2	2	9.62	26.1745	3	3	4.1	11.4094	1	1	5.17	11.4094	1	1	NA	0	NA	NA	0	1	1	1	1	4	CIP	ITAG only
Solyc01g008960	Argonaute 4-like protein IPR003165 Stem cell self-renewal protein Piwi	AT2G27040	MAEEETNGAAAEGLPPPPPVPPDFTPAKTEIEPVKKKILRVPMARRGVGNKGQKIQILTNHFKVNVNNVDGHFFHYSVALFYEDGRPVDGKGVGRKVLDTVHETYDTELAGKDFAYDGEKSLFTIGALPRNKMEFTVVLDDVISNRNNGNSSPGGHGSPNEADRKRLRRPYQSKTFKVEISFAAKIPMQAIANALRGQESENSQEALRVLDIILRQHAAKQGCLLVRQSFFHNDPKNFVDVGAGVLGCRGFHSSFRTTQSGLSLNIDVSTTMIIQPGPVVDFLIANQNAKDPFSLDWAKAKRVLKNLRVKTTPTNQEYKITGLSDRPCREQLFTLKQKGKDADGEVQTTEVTVFDYFVNHRNIELRYSADLPCINVGKPKRPTFFPIELCSLVSLQRYT…	0	20.524	0	8.69087	7	7	4	0.409	NA	0	NA	NA	9.12	4.84048	4	4	NA	0	NA	NA	8.2	3.85039	3	3	NA	0	NA	NA	0	1	0	1	0	2	Sporadic	ITAG only
Solyc01g008970	Heterogeneous nuclear ribonucleoprotein A3-like protein 2 IPR000504 RNA recognition motif, RNP-1	AT2G41060	MAKKRKTRASEPSQPAEEPVEIKQEPEVEPAQEEEYENDAVEVEEEEAVHEDEEEQDPEEEEEEGGEDDEEEEETPGSGNDAVEGDNEKSEQVNGGGAEVKIEEGNEEDLEDEPLENLLEPFTKDQLTALIKEALAKYPDFKENIQKLADKDPAHRKIFVHGLGWDTTAETLTSVFGSYGEIEDCKAVADKVSGKSKGYGFILFKHRSGARKALKEPQKKIGTRMTSCQLASAGPVPAPPPSTAAAPVSEYTQRKIFVSNVAADLEPQKLLEYFSKFGEVEEGPLGLDKQSGKPKGFCLFVYKTVEGARKALEEPHKTFEGHTLHCQKAIDGPKHSKNFHQQQQPQSQQHYPHCDPSSWTGTDSAVSYTRSWFGDR	0	4.642	0	3.98936	1	2	1	0.179	NA	0	NA	NA	2.94	3.98936	1	1	NA	0	NA	NA	2.29	3.98936	1	1	NA	0	NA	NA	0	1	0	1	0	2	1 Peptide	ITAG only
Solyc01g009010	4-diphosphocytidyl-2-C-methyl-D-erythritol kinase (AHRD V1 ***- A4USB3_NICBE); contains Interpro domain(s) IPR004424 4-diphosphocytidyl-2C-methyl-D-erythritol kinase	AT2G26930	MASCNILCSVKPQIDSFKKSCFFQSWSNRPHGSSYFNKNIQFRRNSFVIVKASGSRTSKKQVEITYNPEEKFNKLADEVDREAGLSRLTLFSPCKINVFLRITSKRDDGYHDLASLFHVISLGDKIKFSLSPSKSKDRLSTNVAGVPLDERNLIIKALNLYRKKTGTDNYFWIHLDKKVPTGAGLGGGSSNAATTLWAANQFSGCVATEKELQEWSGEIGSDIPFFFSHGAAYCTGRGEVVQDIPSPIPFDIPMVLIKPQQACSTAEVYKRFQLDLSSKVDPLSLLEKISTSGISQDVCVNDLEPPAFEVLPSLKRLKQRVIAAGRGQYDAVFMSGSGSTIVGVGSPDPPQFVYDDEEYKDVFLSEASFITRPANEWYVEPVSGSTIGDQPEFSTSFDMS	0	27.832	0	17.25	7	22	7	2.728	9.88	8.75	3	3	8.01	7.75	3	3	19.33	15.25	6	7	15.67	12	5	5	13.2	9.5	4	4	1	1	1	1	1	5	WTSP	Detected by both ITAG and Atlas
Solyc01g009020	Cysteine proteinase inhibitor IPR000010 Proteinase inhibitor I25, cystatin	AT5G12140	MTRDLLDAKKYNYSKMATLGGIREAGGSENSLEINDLARFAVDEHNKKQNALLEFGKVVNVKEQVVAGTMYYITLEATEGGKKKAYEAKVWVKPWQNFKQVEDFKLIGDAATA	0	10.711	0	23.0088	2	9	2	0.778	2.67	8.84956	1	1	6.71	23.0088	2	2	4.71	8.84956	1	2	6.66	23.0088	2	3	4.1	14.1593	1	1	1	1	1	1	1	5	CIP	ITAG only
Solyc01g009080	FHA domain containing protein (AHRD V1 ***- B6TP39_MAIZE); contains Interpro domain(s) IPR000253 Forkhead-associated	AT2G21530	MELTTTSQSISYANLPKIPSFFPSRVTISSSNSINFLGYNCITKKIKCSARQLRHFGPIYASMVESNSTNGSVSWILEFIGDGDTRHIGSPTAKPRSLEIPSGAVIVGRVADKADVVIPVPTVSAIHARLQNMEDYLVVTDLDSTNGTFIGEKRLVPGVAAAALPGSLVTFGDTNLAIFRVAKFEKMETNASEVEEEEPSST	0	30.903	0	27.2277	4	35	4	20.544	22.01	27.2277	4	9	16.93	22.2772	3	6	20.51	27.2277	4	9	19.94	22.2772	3	7	10.28	12.8713	2	4	1	1	1	1	1	5	WTSP	Detected by both ITAG and Atlas
Solyc01g009090	Serrate RNA effector molecule homolog (AHRD V1 *-*- SRRT_DROWI)	AT2G27100	MAEVMDAPSEGLERRRERSKENPNKSTEEPPVSSPPPPPPPPPSRRGRDRDSRERRDDRDFDRRGGRGDYYDRNRSPPHHPPGRERDYKRGRPSHSPPPPLPPYRDRRGGYSPPHRRSPPFPPYKRSRRDDYDGRRGSPRGGFGHGDRRYGYDHQGGYDREMGGRPGYPDERHHGRFAGRSSGGYRGGDWGPVRGGFADSFGAGNNQREGLKSYKQFIQELEDDILPAEAERRYQEYKAGYIEAQKRAYFNAHKDEEWLKDKYHPSNLISVIERRNELARKSAKDFLLDLQSGTLDIGPGVAPPPTNKSGQSSEPNSDEEADENGKRRRHGRGHNKDPDLLLAAPKAHLVSSDPRRVQIDVEQAQALVRKLDSEKGIEDNILSRSDNDRGSRDKSHGST…	0.054	1.526	77	2.40642	1	1	1	0.064	NA	0	NA	NA	0	2.40642	1	1	NA	0	NA	NA	NA	0	NA	NA	NA	0	NA	NA	0	0	0	1	0	1	1 Peptide	Atlas only
Solyc01g009180	5-methyltetrahydropteroyltriglutamate--homocysteine methyltransferase (AHRD V1 ***- B6UF55_MAIZE); contains Interpro domain(s) IPR006276 5-methyltetrahydropteroyltriglutamate--homocysteine S-methyltransferase	AT5G20980	MLTVAKKLSSIYMRLVLPTPSSSTFLSFGSSVSVFSPPRGTQFLRLNFRFRTMASHVVGYPRMGPKRELKFALESFWDGKSNSEDLEKVAADLRLSIWKQMADAGIKYIPSNTFSYYDQVLDTTAMLGAVPPRYGWNGGEIGFDVYFPMARGNASVPAMEMTKWFDTNYHYIVPELGPDVKFSYASHKAVSEYKEAKSLGIDTVPVLVGPVSFLLLSKAAKGVEKSFPLLSLIEKILPVYKEVIAELKAAGASWIQFDEPTLVKDLDSHQLQAFSHAYSELESPLSGLNVLIETYFADVPAEAFKTVTSLKCVTALGFDLVRGSKNLDLIKSGFPSEKYLFAGVVDGRNIWANDLAASLSTLQALENVVGKDKLVVSTSCSLLHTAVDLVNETKLDEEI…	0	30.732	0	12.9743	9	17	9	0.688	3.65	1.95838	2	2	9.23	5.63035	4	4	6.74	4.03917	3	3	10.39	5.63035	4	4	10.46	4.65116	3	4	1	1	1	1	1	5	WTSP	Detected by both ITAG and Atlas
Solyc01g009520	Ribosomal protein IPR002143 Ribosomal protein L1	AT5G22440	MSKLQSDALREAITVIKNDSSEKKRKFTETIELQIGLKNYDPQKDKRFSGSVKLPHIPRPKMKICMLGDAQHVGEAEKIGLEYMDVEGLKKLNKNKKLVKKLAKKYHAFLASEAVIKQIPRLLGPGLNKAGKFPTLVSHQESLESKVNETKATIKFQLKKVLCMGVAVGNMDMEEKQIFQNVQMSVNFLVSLLKKNWQNVRCLYLKSTMGKTQRIF	0	14.541	0	16.2037	3	3	1	0.638	2.13	3.7037	1	1	7.5	12.5	2	2	NA	0	NA	NA	NA	0	NA	NA	NA	0	NA	NA	0	0	0	1	1	2	Sporadic	ITAG only
Solyc01g009970	Amidohydrolase 2 (AHRD V1 ***- Q01SB2_SOLUE); contains Interpro domain(s) IPR006992 Amidohydrolase 2	AT2G35450	MVAAVTVNSLKPLTCAPFFSSLNSFNCPCSLVSIPTIHSRLRPLLAQMAATGEVEPQVIDSHLHVWASPQEAAEKYPYFPGQEPSLTGHVEFLLECMEEAGVDGALIVQPINHKFDHSYVTSVLKKFPSKFVGCCLANPAEDGSGIKHLEDLVLKDGYRAVRFNPYLWPSGEKMTNKIGKALFSKAGELGVPVGFMCMKGLLLHLQEIEELCTEFPSTVVLLDHVAFCKPPKNDEERRGYSELLKLSRFPQVYVKFSALFRVSRNPYPYEDLPHVLPQLVSSYGAHRIMWGSDFPYVVAECGYKEAREAVSYLAKQGHLPSSATEWIMGKTIMQLFDGKWSSVAN	0	30.294	0	20	7	30	7	4.878	18.77	17.971	6	7	21.58	16.8116	6	9	10.88	13.3333	4	4	14.38	13.3333	4	6	7.75	9.56522	3	4	1	1	1	1	1	5	WTSP	Detected by both ITAG and Atlas
Solyc01g009990	Peptidyl-prolyl cis-trans isomerase (AHRD V1 ***- B9RMA5_RICCO); contains Interpro domain(s) IPR002130 Peptidyl-prolyl cis-trans isomerase, cyclophilin-type	AT5G13120	MAATFASVSNLGSISVPRVANPTYAAYPKLLKSSFSSSSLFGGSLRLDTSSNRSVHKKTGGSSGSIQAAVEVADLQSKVTNKVYFDISIGNPVGKLAGRIVIGLYGDDVPQTAENFRALCTGEKGFGFKDSAFHRVIKDFMIQGGDFDKGNGTGGKSIYGRTFKDENFKLVHTGPGIVSMANAGPNTNGSQFFICTVKTPWLDQKHVVFGQVLEGMDIVKLIESQETDRGDRPRKRVVISDCGELPIV	0	105.898	0	35.8871	10	191	10	30.623	137.51	35.8871	10	50	138.01	35.8871	10	49	108.9	30.2419	7	37	73.26	30.2419	8	28	68.09	30.2419	8	27	1	1	1	1	1	5	WTSP	Detected by both ITAG and Atlas
Solyc01g010440	Unknown Protein (AHRD V1)	AT1G27090	MASTPVSELSDGPVLSVINKRLRALRKKHSRILQMEESRTKGKTLNKEQEETLRSKSAVIAAIDELEKLRQPLAAAVVEEINLSTGQHQVSPAESAVNISIDSTDKGEPAREGVLVVEDLLNLLYFGSMFDVKSLQSDFTPTMLTRTMERACCLSYDCMPDDESTDVMDLLGERDLDLISMLSGLLVSRPVNSPLSHKHALQKCIEHAKLWLSKSEQPIEPNSDATYAGLRSKLDKIIASLYFTTDPVKVEAAAGKYGSYSVPVEEHHVEAVPVDVPLQVDTPSVQYEQKEEAVSSQAIETNDNHISNNIELQQGGQDINQPAEPEEVVFEVEGVDNMKDADFNEQQSVPRRSYQNQNYRGNRGGSVGDRRGYSNGRGGRGRGGSYQNGRNQYYDQSGN…	0.003	3.485	4	2.71493	1	2	1	0.166	NA	0	NA	NA	NA	0	NA	NA	2.8	2.71493	1	1	2.86	2.71493	1	1	NA	0	NA	NA	0	1	1	0	0	2	1 Peptide	Detected by both ITAG and Atlas
Solyc01g010460	Unknown Protein (AHRD V1)	AT1G27070	MVSLILTPTHLSFSPIPTPIVINSPKRLHCRRKAAIFNLVLGKNMGSFQVFKKLSKKRVGDSSYCLCRKGLGSEGDMELEEEILAFMEISENPNVFPTRKELEKAGRVDLVEAIKKRGGWFSFGWDSEDDDTNTVNVNVNEVESVEMNFDIEEFHERVKRCQESDLLHENEAHFSGSGDSSSSQPASSSGRSIETVAEENSGIEGILSRLEKERNSSLGIDLGKPGHTSHTSSRDNIDDRSFGTSDADRTDLRKNESLSKGSSMKDIQSDEEIYRSVSPARLRKWSIQRAGLQDIDFEAAEVALGKSWIGSTSEASGDDVVNITASRFEALQRSKNGNNNEMSTRLKHLELELSMTLRSLKSKSEEFSSKEVLICVFCFS	0.014	2.189	19	4.47368	1	1	1	0.155	3.21	4.47368	1	1	NA	0	NA	NA	NA	0	NA	NA	NA	0	NA	NA	NA	0	NA	NA	0	0	0	0	1	1	WTSP	Detected by both ITAG and Atlas
Solyc01g010580	Ribosomal protein IPR002942 RNA-binding S4 IPR018079 Ribosomal protein S4, conserved site IPR001912 Ribosomal protein S4	AT5G15200	MVHVSFYRNYGKTFKKPRRPYEKERLDAELKLVGEYGLRCKRELWRVQYALSRIRNAARMLLTLDEKDPRRIFEGEALLRRMNRYGLLDESQNKLDYVLALTVENFLERRLQTLVFKTGMAKSIHHARVLIRQRHIRVGRQVVNVASFMVRVDSQKHIDFSLTSPFGGGRPGRVKRKNQKSAAKKAAGGDGDEEDEE	0	5.131	0	13.198	2	2	0	0.425	NA	0	NA	NA	2.94	13.198	2	2	NA	0	NA	NA	NA	0	NA	NA	NA	0	NA	NA	0	0	0	1	0	1	Sporadic	ITAG only
Solyc01g010750	Stress responsive protein IPR008997 Ricin B-related lectin	no hits	MEYPFGHHGHHHHHHRRDDDDDRREEFPPPGHRPPYDEPPPPQVGQVFHTSHVGGPPPMEPNYDRPHYPPPPMDDNYGRTEYTPPMDDIYGRTNYPPPPMEENYGGSYNRPPPRSDYYDAPPPPPTSGYPSVEHVSHESESGDRHHDRHRFQPHVPTAFHHQTSDPELMDKPSFRVYTKADTNYSLTIRDGKVVLASNDPSDPFQHWYKDEKFSTKVKDEEGFPSFALVNKASGLAVKHSIGASHPVQLTPYNPDVLDASILWTESRDVGDGYRAVRMVNNINLNLDAWNADKEHGGVRDGTTVCLWEWWKGDNRNQHWKIVRYVGL	0.004	2.515	9	4.58716	1	2	1	0.292	NA	0	NA	NA	2.61	4.58716	1	1	NA	0	NA	NA	3.07	4.58716	1	1	NA	0	NA	NA	0	1	0	1	0	2	1 Peptide	ITAG only
Solyc01g010830	HAD-superfamily hydrolase (AHRD V1 ***- D5A3P4_SPIPL); contains Interpro domain(s) IPR011949 HAD-superfamily hydrolase, subfamily IA, REG-2-like	AT1G14310	MEAGTFLRALNPFKFRAKFSGSYTTRCSSSSSSIKIPTGKEMGRRAYDGLLLDAANTLLQLSKPVEETYAGIGKKYGLTTSPAEIKQGFKRAFSAPWPENLRYQDDGRPFWKLVVSEATGCSDDTYFEEVYQHYASGEAWHLPAGAYDTILILKRSGVKLAVVSNFDTRLRKILKDLNMLDLFDAVIISSEVGHEKPDTKIFRAALDQISVEAMKTVHVGDDEKADKGGANAAGIDCWLWGVDVKSFGDIQNRILTEP	0	4.837	0	6.97674	2	2	2	0.468	1.86	6.97674	2	2	NA	0	NA	NA	NA	0	NA	NA	NA	0	NA	NA	NA	0	NA	NA	0	0	0	0	1	1	Sporadic	Detected by both ITAG and Atlas
Solyc01g028810	chaperonin (AHRD V1 ***- B4VMY1_9CYAN); contains Interpro domain(s) IPR001844 Chaperonin Cpn60	AT3G13470	MASTFAGMSSAGPLAAPSTSSNKLSSVANISSTSFGSKRNVALKKSRRPTILAAAKELHFNKDGSAIKKLQNGVNKLADLVGVTLGPKGRNVVLESKYGAPKIVNDGVTVAREVELEDPVENIGAKLVRQAAAKTNDLAGDGTTTSVVLAQGLIAEGVKVVAAGANPVLITRGIEKTAKALVAELKNMSKEVEDSELADVAAVSAGNNLEVGSMIAEAMSKVGRKGVVTLEEGKSAENSLRVVEGMQFDRGYVSPYFVTDSEKMSVEYENCKLLLVDKKITNARDLVNVLEDAIRNGYPILIIAEDIEQEALATLVVNKLRGALKVAALKAPGFGERKSQYLDDIATLTGGTVIREELGLTLDKADKEVLGHAAKVVLTKDATTIVGDGSTQEAVNKRV…	0	207.046	0	46.9115	34	255	27	19.62	205.37	46.7446	31	69	117.09	40.9015	24	39	166.2	37.8965	26	55	113.04	34.2237	22	40	155.6	34.8915	22	52	1	1	1	1	1	5	WTSP	Detected by both ITAG and Atlas
Solyc01g044360	Importin beta-3 (AHRD V1 **-- Q16TN4_AEDAE); contains Interpro domain(s) IPR011989 Armadillo-like helical	AT5G19820	MAAEQAQLAAILGPDSAPFETLISHLMSASNEQRSQAESIFNLIKQNDPNSLALKLANLLSSSPHHEARAMSTILLRKLLTRDDSFIWPRLTESTQSGIKSVLLRCIQHEESKSIIKKLCDTISELASSILPENNWPELLPFMFQCVTSDVPKLQESAFLIFALLAQYVGEMLVPYIKDLHTVFMQTLNNSPNPDVRIAGLSAVINFIQCLSSSNDRDRFQDLLPAMMKTLTEALNSGQEATAQEALELLIELAGTEPRFLRRQLVDVVGAMLQIAEAESLEEGTRHLAIEFVITLAEARERAPGMMRKLPQFISRLFAILMKMLLDIDDEPVWHSAEVEHEDAGETSNYSVGQECLDRLSIALGGSTIVPVASEQLPPYLAAPEWQKHHAALIALAQI…	0	8.191	0	1.89019	2	5	2	0.136	6.17	1.89019	2	2	2.11	0.630063	1	1	2.45	0.630063	1	1	NA	0	NA	NA	1.94	0.630063	1	1	1	0	1	1	1	4	CIP	Detected by both ITAG and Atlas
Solyc01g049680	Transcriptional activator protein Pur-alpha (AHRD V1 *-*- C1BSV9_9MAXI); contains Interpro domain(s) IPR006628 PUR-alpha/beta/gamma, DNA/RNA-binding	AT2G32080	MQVSEASVSRNRSTIIVPAGSARDEGWAAFRNILAEINEASRLFISPNQQSLETSERLGLSDDVGAGFISSHSSQSAPTADLTIERTIDLPAADEVSDVGVSKVIRVDQKRFFFDLGNNNRGHFLRISEVAGSDRSSIILPLSGLKQFYDMVGHFVEISKDRLEGITGANVRTIDSPQR	0.01	2.426	13	4.46927	1	2	1	0.212	NA	0	NA	NA	NA	0	NA	NA	NA	0	NA	NA	1.82	4.46927	1	1	2.06	4.46927	1	1	1	1	0	0	0	2	1 Peptide	Detected by both ITAG and Atlas
Solyc01g056950	Orf141 protein (AHRD V1 *-*- Q5U6D6_BETVU)	no hits	MKNQDTEKTQRRNSSALSRCMLGHKLHSSGYGKEKAEENYRNCAKARSSTSVLPIEKGNSSTSTTHALSSILSNGEESVKGVLLVAEKETTEERQRDELKKNEDGQAWVGLFDQNKMTAQGMNLSYPPPIVQEGKVLIRFEREDMDEGNEKWKKVLVLYVLGNTASIGAIERFVASKWNFVMK	0.067	1.439	97	4.37158	1	1	1	0.212	1.71	4.37158	1	1	NA	0	NA	NA	NA	0	NA	NA	NA	0	NA	NA	NA	0	NA	NA	0	0	0	0	1	1	1 PSM	Atlas only
Solyc01g057210	Pyruvate dehydrogenase kinase IPR018955 Branched-chain alpha-ketoacid dehydrogenase kinase_Pyruvate dehydrogenase kinase, mitochondrial	AT3G06483	MAAKKLYESFSKELIEEVHRWGSMKQTGVSLKYMMEFGSKPTPRNLLISSQFLHKELPMRIARRVIDLQTLPYGLSLKPAVLKVRDWYLDSFRDLRSFPDIKDENDELEFTKMINLVKVRHNNVVPMMALGVQQLKKDLHPKIDYKDLDEIHQFLDRFYMSRIGIRMLIGQHVALHDPNPPPDCVGYIHTKMSPLEVARNATEDARSICLREYGSAPKVNIYGDPNFTFPYVPTHLHLMVFELVKNSLRAVEERFVDSDKVAPPVRIIVADGLEDVTIKISDEGGGIPRSGLPKIFTYLYSTARNPLDEHSDLDTIDLATVSTLAGYGYGLPISRLYARYFGGDLQIISMEGYGTDAYLHLSRLGDSQEPLP	0	4.737	0	4.30108	1	1	1	0.122	NA	0	NA	NA	2.87	4.30108	1	1	NA	0	NA	NA	NA	0	NA	NA	NA	0	NA	NA	0	0	0	1	0	1	1 PSM	ITAG only
Solyc01g057780	Zinc finger protein VAR3, chloroplastic (AHRD V1 **-- VAR3_ARATH); contains Interpro domain(s) IPR001876 Zinc finger, RanBP2-type	AT1G55040	MASRFISLLGTPFPTFLNHLRCPSFLHLRRLACGSRRFTAYSHPHISPLSPSQQQFHAQPINNNTPLDSSSSSSSFTSHPWPEWRSLITLLTGNDQLPPAVEDSDSFVTYEELSQDFLRAATLCLDFARERPNFIGLLSRRDIEAVVSNGTPFLFKGALETARRMRAFLGIDGSTVLDHGNANTVDLMKYILCYASKPSVSSEKNSLYSRDLIESSCRSLLRELVEVSCGAPAVNLPPAEQYDFSGRYGQTPRPIRQNIVMKRGDWICQKCNFMNFARNNKCLECEEPRPRRQLTGGEWECPQCYFFNYGRNVVCLRCDFGRPAGASPRTTHSSAEDGYNGNSAYSNGMDLKLAENEEKAQRWFSKISQMKNASDMDSAAADEDFPEIMPPRKGENKFV…	0.002	4.003	3	1.373	1	2	1	0.059	NA	0	NA	NA	NA	0	NA	NA	NA	0	NA	NA	2.94	1.373	1	1	2.81	1.373	1	1	1	1	0	0	0	2	WTSP	Detected by both ITAG and Atlas
Solyc01g057830	30S ribosomal protein S1 (AHRD V1 **-- B4FUZ5_MAIZE); contains Interpro domain(s) IPR003029 Ribosomal protein S1, RNA binding domain	AT5G30510	MASLTQQFVGLKCPPMSTTRLVNPSNYHHHQSKQKPRIVIQAAAVIANAQTRERLKLKEMFEDAYERCRTTPMEGVAFTVDDFHSALEKYDFDSEVGTKVKGTVFSVDANGALVDITAKSSAYLPLREASLHTIRHVEEAGIFPGLREEFVVVGENEADDSLVLSLRSIQYDLAWERCRQLQAEDVVIKGKVVGANKGGVVALVEGLRGFVPFSQISTKSTAEELLEKELPLKFVEVDEEQSRLVLSNRKAMADSQAQLGIGSVVLGSVQSLKPYGAFIDIGGINGLLHVSQISHDRVSDIATVLQPGDTLKVMILSHDRERGRVSLSTKKLEPTPGDMIRNPKLVFEKAEEMAQTFRQRIAQAEAMARADMLRFQPESGLTLNSDGILGPLTSELPED…	0	147.16	0	46.6019	22	177	13	60.897	111.59	42.233	20	49	97.71	42.7184	20	41	92.15	40.7767	18	37	59.15	38.1068	15	27	55.06	27.1845	12	23	1	1	1	1	1	5	WTSP	Detected by both ITAG and Atlas
Solyc01g059830	Enoyl-CoA hydratase IPR001753 Crotonase, core	AT4G16210	MEKSSPEKLILVTHEAGGIACITINRPHSLNSLTKSMLTDLARIFKSLDADDSVRVIILTGSGRSFCSGIDLTAAEDVFKGDFRDMEIDPVFQMEQCRKPIIGAVAGFAVTGGFEISLACDILVASKDAKFLDTHARFGIFPSWGLSQKLSRIIGPSRAREVSLTATPINAEQAERWGLVNYVVDRSELLNKARQIAEAIIKNNQDLVLRYKAVINDGFKHDLTRALALEKERAHEYYDGMGKDYFKKMQEFIAGRNTSKPSSKL	0	4.674	0	6.03774	1	2	1	0.136	NA	0	NA	NA	2.46	6.03774	1	1	NA	0	NA	NA	3.13	6.03774	1	1	NA	0	NA	NA	0	1	0	1	0	2	1 Peptide	ITAG only
Solyc01g059930	Universal stress protein IPR006016 UspA	AT3G17020	MEGGGRFVGVAVDFSACSNKALKWAIDNILRKGDHLILVTVRPEGHYEEGEMQLWEATGSPLIPLSEICDGHTMKRYGVNPDPETLQMITLAARQMEITVVMKIFWGDAREKLCEAIDKTPLSCLVIGNRGLGKIKRVIMGSVSNYVVNNATCPVTVVKNAED	0.026	1.664	64	4.90798	1	1	1	0.334	NA	0	NA	NA	1.95	4.90798	1	1	NA	0	NA	NA	NA	0	NA	NA	NA	0	NA	NA	0	0	0	1	0	1	1 PSM	ITAG only
Solyc01g060020	Beta-glucanase IPR000490 Glycoside hydrolase, family 17	AT4G16260	MATSQIAIIVLLGLLVATNIHITEAQIGVCYGMMGNNLPSHSEVIQLYKSRNIRRLRLYDPNHGALNALRGSNIEVILGLPNVDVKHISSGMEHARWWVQKNVRDFWPHVKIKYIAVGNEISPVTGTSNLAPFQVPALVNIYKAIGEAGLGNDIKVSTSVDMTLIGNSYPPSQGSFRNDVRWFTDPIVGFLRDTRAPLLVNIYPYFSYSGNPGQISLPYALFTAPNVVVQDGSRQYRNLFDAMLDSVYAAMDRTGGGSVGIVVSESGWPSAGAFGATHENAQTYLRNLIQHAKEGSPRKPGPIETYIFAMFDENNKNPELEKHFGMFSPNKQPKYNLNFGVSERVWDITNSTASSLTSEI	0	13.309	0	9.72222	3	9	3	1.154	4.17	3.33333	1	1	6	6.66667	2	2	7.78	3.33333	1	2	10.24	6.38889	2	3	2.98	3.33333	1	1	1	1	1	1	1	5	CIP	ITAG only
Solyc01g060470	Importin alpha-1b subunit IPR011989 Armadillo-like helical	AT3G06720	MSLRPSDRTEVRRNRYKVAVDADEGRRRREDNLVEIRKSKREESLLKKRREGLQAAQQQQFPANLQTSTVEKKLESLPSMVAGVWSNDNNMQLEATTQFRKLLSIERSPPIEEVIQSGVVPRFVEFLMREDFPQLQFEAAWALTNIASGTSENTRVVIDHGAVPIFVKLLASPSDDVREQAVWALGNVAGDSPRCRDLVLSNGALIPLLSQLNEHAKLSMLRNATWTLSNFCRGKPQPPFEQVRPALSALQRLVHSNDEEVLTDACWALSYLSDGTNDKIQAVIEAGVCPRLVELLMHPSPSVLIPALRTVGNIVTGDDLQTQCIIEHGALACLLSLLSHSHKKSIKKEACWTISNITAGNKEQIQAVIEAGLISPLVNLLQTAEFDIKKEAAWAISNA…	0	16.391	0	7.54717	3	5	3	0.668	NA	0	NA	NA	5.87	4.71698	2	2	NA	0	NA	NA	3.8	3.39623	1	1	7.4	2.83019	1	2	1	1	0	1	0	3	CIP	ITAG only
Solyc01g066480	Fumarylacetoacetate hydrolase domain-containing protein 1 (AHRD V1 **-- B6TV71_MAIZE); contains Interpro domain(s) IPR002529 Fumarylacetoacetase, C-terminal-like	AT3G16700	MYAKIQTFTIARNLVCSSGRAIAKSFSSRNMATTGAATADHRNLISVGSKIIAVGRNYAAHAKELGNAVPKEPVLFMKPTSSYLENGGTIEVPYPLESLDHEVELAVVISKRARDVPEATAMEYVGGYALGLDMTAREIQATAKSAGLPWTVAKGQDTFTPISSVLPQSMVPDPHDIELWLKVDGELRQKGSTRDMIFKIPYLISHISSIMTLLQGDVILTGTPKGVGPVKVGQKIDAGITGLLDVHFDVGRRPGEKQQ	0	5.09	0	6.94981	2	3	2	0.468	2.52	3.861	1	1	4.07	6.94981	2	2	NA	0	NA	NA	NA	0	NA	NA	NA	0	NA	NA	0	0	0	1	1	2	CIP	Detected by both ITAG and Atlas
Solyc01g066520	Dihydrolipoyllysine-residue acetyltransferase component of pyruvate dehydrogenase complex (AHRD V1 ***- C3BP76_9BACI); contains Interpro domain(s) IPR015761 Lipoamide Acyltransferase	AT3G06850	MICRKIYQGKLPNSVLRQTIFRWFQSSVETPVTPVTSTVSSGKRIQSQLHFLRIYTPPFCSYTKSNASFTLRGCGFSTQAALDIPVDGIIDIPLAQTGEGIAECELIKWFVQEGDQVEEFQPLCEVQSDKATIEITSRYKGKISQILHVPGSIVKVGETLLKIGVDEILDPTETSDASEKMISLESDFSGTSDISSVPAETKMGGVLSTPAVRNLAKQYSLDINDVPATGKGGRILKEDVINYAMQKGLINGAPACEQQNLSEVSPPIGGGYEDKTLQLRGYQRAMVKSMTLAAKIPHFHYVEEINCDALVELKTSFKNETSDPEIKHTFLPVLIKSLSMALTTHPMLNSRFSEESYEVILKGSHNIGIAMATPNGLVVPNIKNVQSLSILEITKELSR…	0.004	3.215	5	3.56436	1	2	1	0.11	3.1	3.56436	1	1	2.91	3.56436	1	1	NA	0	NA	NA	NA	0	NA	NA	NA	0	NA	NA	0	0	0	1	1	2	1 Peptide	Detected by both ITAG and Atlas
Solyc01g066740	Transducin family protein (Fragment) IPR017986 WD40 repeat, region	AT3G06880	MATLSSSTPPVFSYDDDKLDLESVRKVVVVINQHITALLADTKSWKSLKLKCSSKLDVCSNRGYLEFSEQSILSNLYWGIESIEAALQAKWSQERTSRLQNSEIMLQVPASLDEHGETAGIPNSYLTGYSYFYLSVVRKLQGDEWQVAMHFLQALAVSPRLLHTEIATELCRQLSVLCIEKEPYSKDENEVYAMMVKMARRYKAWLMYYQIMSSGEDGSLRNGESSSVTSTQHELQQIMSKKSRSTRSSDSCKNENTQCSSSNFEKVHPFNAKNDAKNEKEETIITSNECTKEKQVAITELSGVAEIPKNITTKCLKDILLDSESETFDFSSSSSASENFHEEYAEDMEITSKRSLQNQQTEDFYQNQKSSRSSLFLESLVCKSQVSGLRHNEGNRAEI…	0.036	1.531	88	0.681302	1	1	1	0.04	NA	0	NA	NA	NA	0	NA	NA	NA	0	NA	NA	NA	0	NA	NA	2.25	0.681302	1	1	1	0	0	0	0	1	1 PSM	ITAG only
Solyc01g066840	40S ribosomal protein S21 IPR001931 Ribosomal protein S21e	AT5G27700	MQNDEGQNMDLYIPRKCSATNRLITSKDHASVQLNVGHLDDRGVYTGSFTTFALCGFIRAQGDADSAMDRLWQKKKVEARQE	0	5.546	0	18.2927	1	1	0	0.585	NA	0	NA	NA	2.97	18.2927	1	1	NA	0	NA	NA	NA	0	NA	NA	NA	0	NA	NA	0	0	0	1	0	1	1 PSM	ITAG only
Solyc01g067290	NAD-dependent epimerase/dehydratase (AHRD V1 **-- C8RY11_9RHOB); contains Interpro domain(s) IPR016040 NAD(P)-binding domain	AT5G18660	MSLFAPSSGLTLLQSTKDQNFRQLFSSHFINHVQVRTVPYATPFLSVNVSGRPFRVSSRKLKPIIASAASTVETPKISFRGKNPKDINVLVVGSTGYIGKFVVKELTSRGFNVIAVAREKSGIKGKNSKDDTLEQLNGANVCFSDVTNLETLEKSVQGLGVSIDVVVSCLASRNGGVKDSWNIDYEATKNSLVAGRKFGASHFVLLSAICVQKPLLEFQRAKLKFEAELMKEAEEDNGFTYSIVRPTAFFKSLGGQVELVKDGKPYVMFGDGKLCACKPISEQDLASFMADCVLKEDKINQVLPIGGPGKALTPLEQGEMLFKLVGKEPKFLKVPIEIMDFAIGFLDFLVKIFPSLEDAAEFGKIGRYYAAESMLIWDPDTGEYNAEATPSYGNDTLED…	0	43.429	0	23.3333	10	46	10	5.31	20.19	17.381	6	7	33.59	21.1905	8	12	20.3	15.7143	6	8	19.41	12.619	5	8	28.03	19.5238	8	11	1	1	1	1	1	5	WTSP	Detected by both ITAG and Atlas
Solyc01g067390	Chromodomain-helicase-DNA-binding protein 2 IPR000330 SNF2-related	AT3G06400	MARNTRAKSSSSEPLSDGSEEEQVNDLVNDEEDEEELEAVARSADDDGDDEAVADREDGDDDEDEEEDIAANEISKREKARLKDMQRRKKQKIQEMLDAQNAAIEADMSNKGKGRLKYLLEQTELFAHFAKGDQSTSEKKTKGRGRHASKITEEEEDEEYLKEEDGGLSGNTRLLAQPSCIQGKMRDYQLAGLNWMIRLYENGINGILADEMGLGKTLQTISLLAYLHEFRGITGPHMVVAPKSTLGNWMNEIKRFCPIIRAVKFLGNPEERRYIREDLLVAGKFDVCVTSFEMAIKEKSALRRFNWRYIIIDEAHRIKNENSLLSKTMRLYSTNYRLLITGTPLQNNLHELWALLNFLLPEIFSSAETFDEWFQISGENDQQEVVQQLHKVLRPFLLR…	0.002	3.528	4	1.31455	1	1	1	0.037	NA	0	NA	NA	3.43	1.31455	1	1	NA	0	NA	NA	NA	0	NA	NA	NA	0	NA	NA	0	0	0	1	0	1	1 PSM	ITAG only
Solyc01g067630	MRNA complete cds clone RAFL24-13-K22 (AHRD V1 ***- Q67YQ9_ARATH)	AT2G39080	MATITSATSMIGIQCNFEPPQQHFFNRSIKCSLSIPPISSPKFTLHKLSLHAMPANSFRANASSAIDAPSEELEASSRGGIGANDLLIVGPGVLGRLVAERWREEYPGCQIFGQTMTTDHHDELTKMGISPSSRETKFMFKFPYVIYCAPPSRTEDYPGDVRDAALKWSGEGSFLFTSSSAPYDCSDNGSVDEVMVP	0	17.376	0	13.7056	2	13	2	1.683	9.67	13.7056	2	3	9.43	13.7056	2	3	10.71	13.7056	2	3	13.83	13.7056	2	4	NA	0	NA	NA	0	1	1	1	1	4	WTSP	Detected by both ITAG and Atlas
Solyc01g067660	Beta-amylase (AHRD V1 **** Q5F304_SOYBN); contains Interpro domain(s) IPR013781 Glycoside hydrolase, subgroup, catalytic core	AT5G18670	MEVSVMGSSQVNLGRNDLGCREVGNCSFTKSFNSNISSSSSSSSLKSSKLCIKLRSKSLNRFSLKASACSQPEPLILKNNRETKTSDGVKLFVGLPLDAVSSSNTINHARAIAAGLKALKLLGVDGIELPVWWGVVEKETRGKYDWTGYLALAEMIQKLGLKLHVSLSFHASKEAKIQLPEWVSQIGESDPSIFFKDQSGQHYKDSLSFAVTDVPVLDGKTPVQVYKEFCESFKTAFSPFMGSTITGVSLGLGPEGELRYPSHHNPSKMNNHQGAGEFQCYDKYMLSSLKQYAESNGNPLWGLGGPHDAPGSDQPPMTSTFFKDNEGSWETTYGNFFLSWYSEQLISHGSRLLSLATETFHDVPISICGKLPLVHSWYKTRSHPSELTAGFYNTANRDG…	0	6.235	0	3.73832	2	2	2	0.222	4.66	3.73832	2	2	NA	0	NA	NA	NA	0	NA	NA	NA	0	NA	NA	NA	0	NA	NA	0	0	0	0	1	1	Sporadic	Detected by both ITAG and Atlas
Solyc01g067730	Acyl carrier protein (AHRD V1 ***- Q9XF20_CAPCH); contains Interpro domain(s) IPR003231 Acyl carrier protein (ACP)	AT3G05020	MASVTGSSFAISSLSSSFNPNKACLKTSSLSIKGISFPSLRVKPATRRFSISCAAKPETVDKVCEIVKKQLALPSDSAVNGESKFIALGADSLDTVEIVMGLEEAFGITVEEENAQTIATVQDAADLIEDLVAKKC	0	12.04	0	11.7647	2	8	2	2.162	6.65	11.7647	2	2	2.69	11.0294	1	1	8.83	11.0294	1	3	2.51	11.0294	1	1	2.7	11.0294	1	1	1	1	1	1	1	5	WTSP	Detected by both ITAG and Atlas
Solyc01g067740	Superoxide dismutase (AHRD V1 **** B1Q475_CAPCH); contains Interpro domain(s) IPR001424 Superoxide dismutase, copper/zinc binding	AT1G08830	MVKAVAVLNSSEGVSGTILFTQDGDAPTTVNGNISGLKPGLHGFHVHALGDTTNGCMSTGPHYNPAGKEHGAPEDEVRHAGDLGNITVGEDGTASFTITDKQIPLTGPQSIIGRAVVVHADPDDLGKGGHELSKSTGNAGGRIACGIIGLQG	0	9.384	0	15.1316	2	4	2	2.162	2.73	8.55263	1	1	6.97	15.1316	2	3	NA	0	NA	NA	NA	0	NA	NA	NA	0	NA	NA	0	0	0	1	1	2	Sporadic	Detected by both ITAG and Atlas
Solyc01g067750	Shikimate dehydrogenase IPR001381 Dehydroquinase class I	AT3G06350	MELVVDSGVKKMEGEAMRKNQTLICAPIMADSVDQMLILMQKAKISGADLVEVRVDSLKSFNPRPDIDTLIKQCPLPTLFTYSYVLGVGQGILLIRYYKGIGPTWEGGQYAGDEKSRLDALRLAMELGADYIDVELKAIGEFNNALHGNKSAKCKLIVSSHNYESTPSAEDLGNLVARIQASGADIVKFATTAQDITDVARVFQITVHSQVPIIAMVMGEKGLMSRILCPKFGGYLTFGTLEVGKVSAPGQPTVEDLLNLYNFRQLGPDTKIFGIIGKPVSHSKSPLLYNESFRSVGFNGVFMHLLVDDIANFFRTYSSLDFAGFSCTIPHKEAALDCCAEIDPTAKAIGAVNCIIRRPDGKLFGCNTDYIGAISAIEEGLQGSQPSISGSPLAGKLFV…	0	50.769	0	21.8349	10	36	10	2.481	6.28	8.62385	4	4	37.96	20	9	13	21.78	11.0092	5	7	9.02	8.25688	4	4	24.13	11.3761	5	8	1	1	1	1	1	5	WTSP	ITAG only
Solyc01g067890	1-deoxy-D-xylulose 5-phosphate synthase 1 (AHRD V1 ***- C7U110_SOLLC); contains Interpro domain(s) IPR005474 Transketolase, N-terminal IPR005475 Transketolase, central region IPR005477 Deoxyxylulose-5-phosphate synthase	AT4G15560	MALCAYAFPGILNRTGVVSDSSKATPLFSGWIHGTDLQFLFQHKLTHEVKKRSRVVQASLSESGEYYTQRPPTPILDTVNYPIHMKNLSLKELKQLADELRSDTIFNVSKTGGHLGSSLGVVELTVALHYVFNAPQDRILWDVGHQSYPHKILTGRRDKMSTLRQTDGLAGFTKRSESEYDCFGTGHSSTTISAGLGMAVGRDLKGRNNNVIAVIGDGAMTAGQAYEAMNNAGYLDSDMIVILNDNRQVSLPTATLDGPVAPVGALSSALSRLQSNRPLRELREVAKGVTKQIGGPMHELAAKVDEYARGMISGSGSTLFEELGLYYIGPVDGHNIDDLIAILKEVRSTKTTGPVLIHVVTEKGRGYPYAERAADKYHGVAKFDPATGKQFKASAKTQS…	0	28.167	0	9.59666	7	14	7	1.565	8.59	4.17246	3	5	6.41	3.05981	2	2	5.35	3.05981	2	2	2.22	1.25174	1	1	6.8	5.4242	4	4	1	1	1	1	1	5	WTSP	Detected by both ITAG and Atlas
Solyc01g068030	Cyclase/dehydrase (AHRD V1 ***- B6T2Z5_MAIZE); contains Interpro domain(s) IPR005031 Streptomyces cyclase/dehydrase	AT4G01883	MSAITAIPASTTMSATATSASASSSAHILRLNHKQLIFSLHGRRKSISASSSSFFSTYRFNSSISRSSRRISYPSSIRIRPLSPVMEWQDVTVKMEVDVPISVAYKCYSDREAIPEWMPFISTVKILEDKPDLSRWSLKYNAFGQNIEYSWLARNMQPTPNQKIHWRSLEGLPNRGAVRFFPKGPSSCIIELTVSYEVPQLLVPVASALKPFLENLLSQGLERFATFARIYSADTPK	0	30.858	0	28.692	6	30	2	3.125	17.06	22.3629	5	8	22.77	24.8945	5	8	17.16	21.519	4	7	17.29	15.1899	3	6	2.63	4.21941	1	1	1	1	1	1	1	5	WTSP	Detected by both ITAG and Atlas
Solyc01g068150	Chromosome 11 contig 1 DNA sequence IPR019331 NEFA-interacting nuclear protein NIP30, N-terminal	AT3G62140	MADEDFPPPVRLMNFVSEEQLAESKKTRGARVEDGTAQRDRPLYEILKENKDKKDAEFNERFKHQPPKALDEDETEFLEKLEMSRREYEKQVADEEDEQLRSFQAAVAAKSTIVHEIKEMPLVPKVQEPKLIKRKNPPANPLGMIVKIKPQAKKAKMDLVSSVSSLTTATSSDVDNVSTSETEESQRLTKRPIANADNHGPVTIGGLVSYSDESDDD	0.002	3.15	5	5.52995	1	1	1	0	NA	0	NA	NA	NA	0	NA	NA	NA	0	NA	NA	2.16	5.52995	1	1	NA	0	NA	NA	0	1	0	0	0	1	1 PSM	ITAG only
Solyc01g068290	tRNA uridine 5-carboxymethylaminomethyl modification enzyme mnmG (AHRD V1 ***- B4VZ14_9CYAN); contains Interpro domain(s) IPR004416 Glucose-inhibited division protein A	AT2G13440	MATVLSLNWTRFASQVPRSFSSPFLRKHSQFIRLYRSFQFSGSLCTLYSSSRRPFTVVASSSPSNGSSSYAEVGDERYDVIVVGGGHAGCEAALASARLGAKTLLLTLNIDRIAWQPCNPAVGGPAKSQLVHEVDALGGDIGKIADRCYLQKRVLNISRGPAVWALRAQTDKREYALEMKKIVESTPNLFIREAMVTDILLGKNDNVEGVCTFFGMNFYAPSVILTTGTFMSGKIWIGRTSMPAGRAGESASVGLTENLQRLGFETDRLKTGTPARVDSRTVDFSGLEPQYGDEEVSWFSFDANYHIEREQMCCYLTRTTKSTHQLIRDNLHETPTYGGWVEAKGPRYCPSIEDKIVRFQDKESHQIFLEPEGRSVPELYVQGFSTGLPERLQLPLLRT…	0	14.599	0	3.25318	2	5	2	0.199	NA	0	NA	NA	NA	0	NA	NA	8.49	3.25318	2	3	2.6	2.26308	1	1	4.3	2.26308	1	1	1	1	1	0	0	3	WTSP	Detected by both ITAG and Atlas
Solyc01g068400	Tubulin-specific chaperone A IPR004226 Tubulin binding cofactor A	AT2G30410	MKEKGADPYDLKQQENVLAESRMMVPDCRKRLEGALEDLKGTLVELEETEEKQGPEFEEARNIIADVEKLFESSEV	0.004	2.509	9	15.7895	1	1	1	0	NA	0	NA	NA	NA	0	NA	NA	NA	0	NA	NA	NA	0	NA	NA	2.3	15.7895	1	1	1	0	0	0	0	1	1 PSM	ITAG only
Solyc01g068470	CM0216.540.nc protein (Fragment) (AHRD V1 ***- B0BL99_LOTJA)	AT2G38780	MALIPHSQVFSSFSAINSLTNPFPKIFRTIKISASSSSSPNNSKDEQIVETDPVKLAFAKAKAYKKEIKPADSIAQNGVSVSEADDSDEKIALNSNTVIEGSNKENGENDFIKKENEKSDINALPKESVRKKEKLSISSIDFVGLGFSDNKKSRGLPAGLVPIVDSFPGGDLPDVEILVGDTSKFVDTETSKSSRIQEDDMDTYKPKVSTWGVFPRPNDISKTFGGGRTIRPGEVLESAEEKASKQARTRELLAAYKSRVGLTIDPNLKLECEQALKDGDSFMDLGNLKEALPFYEKVMNKLPFQTQLHGLAALQWSICQDSLRRSNEARSMYEKLQSHPNPGVSKKARQFMFSFQAMEMMKVTSSTFSSMNTGYQNYFDAFIRDKVNYSLKEDEAEDG…	0.008	2.543	10	1.87354	1	1	1	0.129	NA	0	NA	NA	2.26	1.87354	1	1	NA	0	NA	NA	NA	0	NA	NA	NA	0	NA	NA	0	0	0	1	0	1	WTSP	Detected by both ITAG and Atlas
Solyc01g068530	30S ribosomal protein S9 IPR000754 Ribosomal protein S9	AT2G09990	MQKQEAAAATVESVQCFGRKKTAVAVTHCKRGRGLIKINGVPIELVQPEILRYKAFEPILLLGRHRFAGVDMRIRVKGGGHTSQIYAIRQSIAKALVAFYQKFVDEQQKKEIKDILIRYDRTLLVADPRRCEPKKFGGRGARSRFQKSYR	0.002	3.375	4	6.66667	1	1	0	0.292	2.03	6.66667	1	1	NA	0	NA	NA	NA	0	NA	NA	NA	0	NA	NA	NA	0	NA	NA	0	0	0	0	1	1	1 PSM	ITAG only
Solyc01g068620	Cyclase/dehydrase (AHRD V1 *-*- D7E269_NOSA0); contains Interpro domain(s) IPR005031 Streptomyces cyclase/dehydrase	AT4G01650	MQVQYQLWWHTITTSSLPLSSIFYRHEATAVAAARYRHDTALSTGAFSLRLNRNPNLTSGRFRLDTVTCSLDIGGNATIDEYDDGDTRNDTGEDGSDEEEEDGGVETEIEKMGKNRRRIRSKIVVKASLQSVWEVLTDYERLADFIPGLAVCQLLEKEPNFARLLQIGEQNLAFGLKFNAKGVIDCYEKDLEDLPTGQRRDIEFKMVEGDFKNFEGKWSIEQCKTGGDQELDSSLDEPFHTTLSYIVDVEPKLWLPVRLIEGRLCKEININLQSVRDEAQKVYLSSFSSY	0	29.485	0	21.0345	5	17	5	2.162	17.06	15.1724	3	5	8.66	10	2	3	10.39	11.0345	3	4	13.56	15.8621	4	5	NA	0	NA	NA	0	1	1	1	1	4	WTSP	Detected by both ITAG and Atlas
Solyc01g073640	Uncharacterized oxidoreductase Mb1385 (AHRD V1 ***- Y1385_MYCBO); contains Interpro domain(s) IPR002347 Glucose/ribitol dehydrogenase	AT2G47120	MANKLRLEGKVAIITGAASGIGEASARLFVEHGARVVVADIQDELGQKVVDSIGSDKASYRHCDVTDEKQVEETVAYAVEKYGTLDIMFSNVGTLNFCSVLDMDVLAFDETMAINVRGSALAVKHAAKVMVDKKIRGSIICNASLEGILAGAASLAYIASKHAVVGIIKAAARELGPHGIRVNGVSPYGIATPLVTKAYGLDAALLEEAIYGNGHLKGVKLSTMHVAQSALFLASDESAYTSGQNLAVDGGLSSILKLQ	0	12.785	0	16.2162	3	7	3	0.995	NA	0	NA	NA	2.04	4.6332	1	1	6.44	11.583	2	2	7.49	11.583	2	2	7.21	11.583	2	2	1	1	1	1	0	4	CIP	Detected by both ITAG and Atlas
Solyc01g073740	Citrate synthase (AHRD V1 ***- O24135_TOBAC); contains Interpro domain(s) IPR010109 Citrate synthase, eukaryotic	AT2G44350	MVFYRSVSLLSKLRSRAVQQSNVSNSVRWLQVQTSSGLDLRSELQELIPEQQDRLKKIKSEYGKVQLGNITVDMVLGGMRGMTGLLWETSLLDPDEGIRFRGLSIPECQKVLPAAKPGGEPLPEGLLWLLLTGKVSAIKRASEFIVSGIAESGYYPWYVNHVYKTIDALPVTAHPMTQFATGVMALQVQSEFQKAYEKGIHKSKFWEPTYEDSMNLIAQVPLVAAYVYRRMYKNGDTIPKDESLDYGANFAHMLGFSSSEMHELMRLYVTIHSDHEGGNVSAHTGHLVASALSDPYLSFAAALNGLAGPLHGLANQEVLLWIKSVVEECGENISKEQLKDYVWKTLNSGKVVPGFGHGVLRKTDPRYTCQREFAMKHLPKDPLFQLVSKLYEVVPPVLT…	0	15.075	0	11.1814	5	8	5	1.054	NA	0	NA	NA	13.86	11.1814	5	6	NA	0	NA	NA	4.13	4.43038	2	2	NA	0	NA	NA	0	1	0	1	0	2	WTSP	Detected by both ITAG and Atlas
Solyc01g074030	Beta-glucosidase 01 (AHRD V1 ***- B5M9E4_SOLLC); contains Interpro domain(s) IPR013781 Glycoside hydrolase, subgroup, catalytic core	AT2G44490	MAFQGSFWAISLLIFLANFLSMIEFSKAANAKVPSHTISNPFNRTIFSPDFLFGASTSSYQYEGAWNEDGKGPSIVDTFVHTHPEKILDRSNGDIALDFYHRYKEDVKLAKFEGLDAFRISIAWTRILPKGSVKKGINQAGIDYYNSLINEIVALGIKPLVTLFHWDLPQALEDEYLGFLSPKVVDDYVDFVEICFKNFGDRVKLWATMNEPWIFTSTGYDSGSLAPGRCSAWMNNNCTIGNSGTEPYIAGHNILLAHAAASKLYRQKYKPIQKGQIGTIVVSHWFEPASNKPEDIKASIRALDFMLGWFMHPLTYGDYPTSMRKLVGKRLPKFTPKESMLVKDSCDFIGLNYYTSNFAAHISKPPNTVNISSGTDNLVNQTTSLNGKLIGDPTGVSIF…	0	22.547	0	12.9594	6	11	6	1.929	9.41	10.058	5	5	5.8	4.25532	2	3	NA	0	NA	NA	2.15	4.64217	2	2	2.09	1.54739	1	1	1	1	0	1	1	4	CIP	Detected by both ITAG and Atlas
Solyc01g079090	Protoporphyrinogen oxidase (AHRD V1 ***- O64384_SOLTU); contains Interpro domain(s) IPR004572 Protoporphyrinogen oxidase	AT4G01690	MTTTAVVNHPSIFTHRSPLPSPSSSSSSSPSFLFLNRTNFIPYFSTSKRSSVNCNGWRTRCSVAKNYTVPPSEVDGNQLPELDCVVVGAGISGLCIAKVISANYPNLMVTEARDRAGGNITTVERDGYLWEEGPNSFQPSDPMLTMAVDCGLKDDLVLGDPDAPRFVLWKDKLRPVPGKLTDLPFFDLMSIPGKLRAGFGAIGLRPSPPGYEESVEQFVRRNLGAEVFERLIEPFCSGVYAGDPSKLSMKAAFGKVWKLEQTGGSIIGGTFKAIKERSSNPKPPRDPRLPTPKGQTVGSFRKGLRMLPDAICERLGSKVKLSWKLSSITKSDKGGYLLTYETPEGVVSLRSRSIVMTVPSYVASNILRPLSVAAADALSSFYYPPVAAVTISYPQEAIR…	0	45.657	0	19.7133	10	44	10	2.162	11.32	11.2903	5	5	22.32	13.2616	6	7	35.94	14.5161	7	12	27.98	12.0072	5	9	31.25	13.9785	6	11	1	1	1	1	1	5	WTSP	Detected by both ITAG and Atlas
Solyc01g079110	Histone H3 (AHRD V1 ***- D8L9K7_WHEAT); contains Interpro domain(s) IPR000164 Histone H3	AT4G40030	MARTKQTARKSTGGKAPRKQLATKAARKSAPATGGVKKPHRFRPGTVALREIRKYQKSTELLIRKLPFQRLVREIAQDFKTDLRFQSSAVAALQEAAEAYLVGVFEDTNLCAIHAKRVTIMPKDIQLARRIRGERA	0	5.637	0	11.7647	2	11	0	2.162	2.53	6.61765	1	2	4.47	11.7647	2	4	0	6.61765	1	1	1.76	11.7647	2	2	1.96	6.61765	1	2	1	1	1	1	1	5	WTSP	Detected by both ITAG and Atlas
Solyc01g079220	NifU like protein (AHRD V1 *-*- B8BR62_THAPS); contains Interpro domain(s) IPR001075 NIF system FeS cluster assembly, NifU, C-terminal	AT4G01940	MAHLAAMGVSQISSSIYMPELPLKSQNPQPSSIFLKRIGVAHKRFNLVKATVDGSPVPAPSPGLYSAKQFELTPENVDMVLEDVRPYLISDGGNVEVVSVEDGVVSLQLQGACESCPSATTTMKMGIERVLKEKFGEAIKDIRQVYNEQVVETTAEAVNAHLDILRPAIKNFGGSVEVLSVEEGNCNVKYVGPESIGSGVKAAIKEKFPDILNVVFTD	0	9.188	0	14.2202	2	8	2	0.931	5.85	14.2202	2	2	5.92	14.2202	2	2	1.88	5.50459	1	1	1.82	5.50459	1	1	4.44	5.50459	1	2	1	1	1	1	1	5	WTSP	Detected by both ITAG and Atlas
Solyc01g079450	Peptidase S9 prolyl oligopeptidase active site domain protein (AHRD V1 ***- B4SK00_STRM5); contains Interpro domain(s) IPR001375 Peptidase S9, prolyl oligopeptidase active site region	AT2G47390	MYEAVAMSLPKVYHRFSLLSLHSTTSPILPKTLFFSSYSLRLAVKRLHSPPLLRPQSRRFVAGKRFQAKSTMASSRFHHLVPVNALTAEDGGNGTGSNGAADATASVAYDDDVESASATGYRLPPFEIRDIVDAPPLPALSFSPLRDKILFLKRRSLPPLSDLARPEEKLAGIRIDGKCNSRSRMSFYTGIAIHQLMEDGSLGPEKEIQGLPKGAKINFVMWSNNGQHLAFSVRLDEDDGSSSKLRVWVANVDTGKARPLFESPDVYVNAVFDNFVWVNDSTLLVCTIPLSRGDPPRKPLVPSGPKIQSNEQKNVIQARTYQDLLKDEYDEDLFEYYATTQLVLASLDGEMKPFGPPAIYTSMDPSPDQTYILISSTHKPFSFVVPCGRFPKKVELWKA…	0	98.863	0	19.1207	15	82	15	3.03	50.99	16.0532	11	18	48.41	16.5644	12	18	60.83	16.9734	13	20	58.36	14.3149	10	19	23.06	8.17996	6	7	1	1	1	1	1	5	WTSP	Detected by both ITAG and Atlas
Solyc01g079470	CP12 (AHRD V1 ***- O24136_TOBAC); contains Interpro domain(s) IPR003823 Protein of unknown function CP12	AT3G62410	MATIAGVSLTSPKFLAKNSNSPNFKPFKLPCLNNPWKKSSTKFGLVCSAAPDNKLSDLVADSVKGAEETCNENPASGECAAAWDVVEEASAAASHARDKKKQEDVLENYCKENPETDECRTYDN	0.002	3.642	3	8.06452	1	10	1	0.389	9.05	8.06452	1	4	4.79	8.06452	1	2	2.05	8.06452	1	2	2.06	8.06452	1	1	2.67	8.06452	1	1	1	1	1	1	1	5	WTSP	Detected by both ITAG and Atlas
Solyc01g079540	ADP-ribosylation factor-like protein 3 IPR006687 GTP-binding protein SAR1	AT1G56330	MFLFDWFYGVLASLGLWQKEAKILFLGLDNAGKTTLLHMLKDERLVQHQPTQYPTSEELSIGKIKFKAFDLGGHQIARRVWKDYYAKVDAVVYLVDAYDKERFAESKKELDALLSDESLATVPFLILGNKIDIPYAASEDELRYHLGLTGVTTGKGKVNLADSSVRPLEVFMCSIVRKMGYGDGFKWVSQYIK	0	12.43	0	20.2073	3	6	0	1.371	NA	0	NA	NA	2.34	5.69948	1	1	4.67	12.4352	2	2	6.38	13.4715	2	2	3.28	7.77202	1	1	1	1	0	0	0	2	CIP	ITAG only
Solyc01g079680	Ran GTPase activating protein (Fragment) (AHRD V1 **-* A7M8K5_NICBE); contains Interpro domain(s) IPR003590 Leucine-rich repeat, ribonuclease inhibitor subtype	AT5G19320	MDATTDNSQRRPFSIKLWPPSENTRKMLVERMTNNLSSPTIFTRKYRSLSKEEAAKNAEEIEDAAFTIANQHYEKEPDGDGSSAVQLYARECSKLILEILKKTPKSEDKEISISEVVPTVQETFFDISKGKRAFIEAEEAQELLKPLKEPGNSYSKICFSNRSFGIDAARIAGPILATLKDQLKEVDLSDFVAGRNEAEALDVMNIFSEALEGSNLKFLNLSDNALGEKGVRAFGKLLQSQTNLEELFLMNDGISQEAANAVSELVPSTEKLKILHFHNNMTGDEGAVAIAEIVKRSPLLEDFRCSSTRVGSEGGSALCEALGMCSHLKKLDLRDNMFGPEVGLVLSKALSQHENLKEIYLSYLNLEDEGAIAIANALKDSAPSLAVLEMAGNDITAEA…	0	83.217	0	31.0909	17	42	17	5.31	14.67	12.5455	6	6	56.6	24	13	18	8.25	6	3	3	31.49	17.6364	9	11	10.62	7.63636	4	4	1	1	1	1	1	5	WTSP	Detected by both ITAG and Atlas
Solyc01g079790	Glucose-1-phosphate adenylyltransferase (AHRD V1 **** P93230_SOLLC); contains Interpro domain(s) IPR011831 Glucose-1-phosphate adenylyltransferase	AT5G19220	MSVATDGRFALLRNNPAALTGTNLKIVKFCNGELMGKKLKYTKFQLRSNVVKPNICMSLTTDIAGEAKLKDLEAKKEDARTVVAIILGGGAGTRLFPLTKRRAKPAVPIGGAYRLIDVPMSNCINSGINKVYILTQFNSASLNRHIARAYNFGNGVTFGDGYVEVLAATQTPGELGKRWFQGTADAVRQFHWLFEDARSKDIEDVLILSGDHLYRMDYLHFVQSHRQSGADITISSLPIDDSRASDFGLMKIDDTGRVMSFSEKPKGDDLKAMAVDTTVLGLSPEEAKEKPYIASMGVYVFKKDILLNLLRWRFPTANDFGSEIIPASTKEFCVKAYLFNDYWEDIGTIRSFFEANLALTEHPPRFSFYDATKPIYTSRRNLPPSAIDNSKIVDSIVSH…	0	214.919	0	55.1456	26	293	24	21.638	219.07	49.1262	23	69	167.9	44.466	20	54	192.49	47.9612	21	67	167.12	44.466	20	57	130.18	40.5825	18	46	1	1	1	1	1	5	WTSP	Detected by both ITAG and Atlas
Solyc01g079820	Redoxin domain protein (AHRD V1 **-- A1WHD5_VEREI); contains Interpro domain(s) IPR013740 Redoxin	AT3G06050	MASAILKRTRMMAQSLRSYASISVGSDVTVAAPNVSLQKARSWDEGVSSKFSTTPIKDIFKGKNVVIFGLPGAYTGVCSMQHVPSYKNNIDKFKAKGIDSVICVAVNDPYTMNGWAEKLQAKDAIEFYGDFDGSFHKSLDLTIDLSAALLGLRSHRWSAYVVDGNVKVLNVEEAPSDFKVSGGDVILGQI	0	12.576	0	22.6316	4	8	4	1.783	6.51	11.5789	2	2	12.21	22.6316	4	4	0	5.78947	1	1	3.3	6.31579	1	1	NA	0	NA	NA	0	1	1	1	1	4	CIP	Detected by both ITAG and Atlas
Solyc01g080140	Dolichol-phosphate mannosyltransferase (AHRD V1 **-- C0NU33_AJECG); contains Interpro domain(s) IPR013744 Protein of unknown function DUF1749	AT5G19050	MDLSTSASFSSSSSSSWFSGIVRGRSTSVKMSNKNPAAAAAAGGTDSVSGAGPITAKKQFRGVMFKYGPKAIQVAFKTGDYKQQLIFIGGLTDGFLATDYLEPLAIALDKEKWSLVQFLVSSSYSGYGTSSLRQDAMELDQLISYLINKEDSEGVVLLGHSTGCQDIVYYMRTNAACSRAVRAAILQAPVSDREYKATLPDTASMIDLASNMISEGRESELMPREANPDAPITAFRYHSLCAYNGEDDLFSSDFSDDQLKQKLGHMSNTPCQVIFSMGDEYVPDYVDKKALVDRLCKAMGGAEKVEIEYGNHSLSNRVVEAVEAIMSFVKREGPSGWDDPWN	0	5.484	0	3.80117	1	1	1	0.233	NA	0	NA	NA	NA	0	NA	NA	3.38	3.80117	1	1	NA	0	NA	NA	NA	0	NA	NA	0	0	1	0	0	1	WTSP	Detected by both ITAG and Atlas
Solyc01g080280	Glutamine synthetase (AHRD V1 ***- B5LAU9_CAPAN); contains Interpro domain(s) IPR008146 Glutamine synthetase, catalytic region	AT5G35630	MAQILAPSAQWQMRMTKSSTDASPLTSKMWSSVVLKQNKRHALKSSAKFRVFALQSDNGTVNRVEQLLNLDVTPYTDKIIAEYIWIGGTGIDMRSKSRTISKPVKDASELPKWNYDGSSTGQAPGEDSEVILYPQAIFKDPFRGGNNILVICDAYTPAGEPIPTNKRHKAAQIFSDPKVAAQVPWFGIEQEYTLLQPNVNWPLGWPVGGYPGPQGPYYCGAGAEKSFGRDISDAHYKACLYAGINISGTNGEVMPGQWEFQVGPSVGIEGGDHIWCARYLLERITEQAGVVLSLDPKPIEGDWNGAGCHTNYSTLSMREEGGFEVIKKAILNLSLRHKEHISAYGEGNERRLTGKHETASIDQFSWGVANRGCSIRVGRDTEKEGKGYLEDRRPASNMD…	0	110.849	0	25.6944	14	472	14	62.096	308.03	25.6944	14	117	222.86	22.4537	11	90	295.65	21.5278	11	101	238.6	19.9074	9	74	267.42	23.8426	11	90	1	1	1	1	1	5	WTSP	Detected by both ITAG and Atlas
Solyc01g080410	Peptide methionine sulfoxide reductase msrB IPR002579 Methionine sulphoxide reductase B	AT4G04840	MAVEKSEEEWRAILSPEQFRILRQKGTELKGSGEYDKFFDEGIYNCAGCGTPLYKSSTKFDSGCGWPAFFEGLPGTINRSPDPDGRRTEITCAACGGHLGHVFKGEGHNTPTDERHCVNSVSVKFIPANTSSVLL	0	5.934	0	19.2593	2	14	1	0.668	5.34	19.2593	2	3	1.82	6.66667	1	1	7.67	19.2593	2	3	6.24	6.66667	1	3	7.31	6.66667	1	4	0	0	1	0	1	2	Sporadic	ITAG only
Solyc01g080460	Pyruvate phosphate dikinase (AHRD V1 ***- Q84N32_SORBI); contains Interpro domain(s) IPR010121 Pyruvate, phosphate dikinase	AT4G15530	MSSTMKGLLLKPNTNNMYMTKLLKHKYAEEQFLAKYSSFGIHMNCSKWSSKVIRCHQQEPNGFSNSPVTPIRKQTPPPQAILSPVSETTSTAKKRVYTFGKGRSEGNKGMKSLLGGKGANLAEMASIGLSVPPGLTISTEACQEYQIAKKLPQGLWEEILQGLEVVEKDMGAFLGNPSKPLLLSVRSGAAISMPGMMDTVLNLGLNDEVVTGLAAKSGERFAYDSYRRFLDMFGDVVMGISHSLFAEKLEKLKDAKGVKLDTELTASDLKQLVEQYKNVYVEAKGEKFPSDPKRQLELAIKAVFDSWDSPRANKYRSINQITGLKGTAVNIQCMVFGNMGNTSGTGVLFTRNPSTGEKKLYGEFLINAQGEDVVAGIRTPQDLETMKECMPEAYKELVE…	0	121.572	0	24.0415	22	77	22	3.642	56.16	18.0311	16	20	43.57	16.7876	14	16	39.41	10.4663	9	14	52.95	15.8549	14	18	23.54	8.91192	8	9	1	1	1	1	1	5	WTSP	Detected by both ITAG and Atlas
Solyc01g080510	Os05g0406000 protein (Fragment)	AT4G15545	MATEFRLPEEIVQVLPSDPFEQLDLARKITSIALSTRISALESEADALRRHLSERDDIINDLNSQLDSLDSSLADAADRLSRAEQEKESLVKENSMLSNTVRKLNRDVAKLEAFRKTLMRSLNEEEDSSAGAPGFAKNGQNQSDQDSSSPASIPPQRTQSTEVGYSHSEDAESETSRPRISPGLLLASQTSTPRLTPPGSPPSLSASVSPSRSPRPLSPRRHSISFSTVRGMYDDRSSAFSTSYNQHGSMSSLEAGSQTARARVDGKEFFRQVRSRLSYEQFGGFLANVKELNSHKQTKEETLRKAAEIFGEENKDLYTIFEGLISRNA	0	4.721	0	3.64742	1	2	1	0.179	2.63	3.64742	1	1	3.05	3.64742	1	1	NA	0	NA	NA	NA	0	NA	NA	NA	0	NA	NA	0	0	0	1	1	2	1 Peptide	ITAG only
Solyc01g080530	Prolyl 4-hydroxylase alpha subunit-like protein IPR006620 Prolyl 4-hydroxylase, alpha subunit	AT3G06300	MNIFSQIFTFFFFLIVVFVTKSSCSAIINPSKVKQISWKPRAFVYEGFLTDEECNHLISLAKKELKRSAVADNESGESKLSEVRTSSGMFISKAKDPIVTGIEEKIATWTFLPKENGEDIQVLRYEEGQRYEPHYDYFTDKVNIVRGGHRLATVLMYLSDVEKGGETVFPEAEVSTRRRSMAADDSLSECAKRGIAVKPRKGDALLFFSLHPNAVPDPMSLHGGCPVMEGEKWSATKWIHVDSFDKTVDSEGGHCADHNENCERWAALGECTKNPEYMVGSTDLPGSCRKSCKSC	0.004	2.41	9	3.05085	1	1	0	0.145	NA	0	NA	NA	2.16	3.05085	1	1	NA	0	NA	NA	NA	0	NA	NA	NA	0	NA	NA	0	0	0	1	0	1	1 PSM	ITAG only
Solyc01g080580	Inosine-uridine preferring nucleoside hydrolase family protein IPR001910 Inosine_uridine-preferring nucleoside hydrolase	AT5G18860	MKEKEKMLLLNELIVMLTMVLILLVNGVKGHRILVDTDMDTDDFFALFYLLKLNTSQMDLKAITISTNGWTDAGHAVNQVYDMLYMMGRDDIAVGVGGEGGILPNGTILPDVGGYLPIIDQGNATAGYCRYRQAIPVGPGGRLDINSNFGFRKSFLPQGKRHYSPLRQPTVQQVMINTISSGPTVVFLIASHTNFALFLLSNPHLKKNVEHIYIMGGGVRSRNPTGCCPQKVSSSCQPQQCGDVGNLFTDYTSNPYAEFNFFMDPFAAYQKNQHTYEAQYCFKSLKMARDTWFDDQFNTSYFMWDSFMSGVAASIMQKQHNQHGENEFAEMEYINITIVTSNKPYGISDGSNPIFDGHITPKFSVARNEVHSGHVQTKLRDPFCIEKNRRGRCQDGYTK…	0.028	1.611	69	1.85185	1	1	1	0.08	NA	0	NA	NA	2.59	1.85185	1	1	NA	0	NA	NA	NA	0	NA	NA	NA	0	NA	NA	0	0	0	1	0	1	1 PSM	ITAG only
Solyc01g080810	Isoleucyl-tRNA synthetase (AHRD V1 ***- Q9FI67_ARATH); contains Interpro domain(s) IPR002301 Isoleucyl-tRNA synthetase, class Ia IPR018353 Isoleucyl-tRNA synthetase	AT5G49030	MEATFFPKRITASKSLVFALARAKMAMQTSSYKLWSLKSCSSLREPTSVSLLNLRSSSSARVFSLMNMTRYSTYSNDDSCPSGKRRSRGPVMAAKKRSEGAKQDDGKYKDTVDLPKTAFGLRANSTVREPELQKIWDDNQVFKRVVERNNGGTFVLHDGPPYANGDLHMGHALNKILKDIINRYKLLQNFRVQYVPGWDCHGLPIELKVLQSLDDDARKELTPLKLRNKAAKFAKSTVQSQMASFKRYGVWADWDQHYLTLHPEYEAAQIEVFGQMAIQGFIYRGRKPVHWSPSSRTALAEAELEYNEEHVSKSMYAIFRLVGVPASCDSLKEFLPNLCLAIWTTTPWTIPANAAVAVNNKLQYAVVEVSSASVDGSTSSVDGKKRFGNFMKGDKSLHL…	0	120.466	0	23.5135	24	91	24	2.286	68.11	19.009	18	24	51.12	13.6937	12	17	59.56	16.7568	16	21	50.81	13.3333	13	18	34.12	8.73874	8	11	1	1	1	1	1	5	WTSP	Detected by both ITAG and Atlas
Solyc01g080840	Protein translocase subunit secA (AHRD V1 ***- B9I9A8_POPTR); contains Interpro domain(s) IPR000185 SecA protein	AT4G01800	MELVFSPPSVDWPATAGGRSSSLANRRSTANEKVRGLIGTRSWLRGGEESLRLLGLELKKTRRRRMMTPEASLGGLLGGIFKSSDSGESTRQMYAATVTLINGMESMVSSLSDSQLREKTAALQERARRGDSLDSLLPEAFAIVREASKRVLGLRPFDVQLIGGMVLHKGEIAEMRTGEGKTLVAILPAYLNALTGKGVHVVTVNDYLARRDCEWVGQVPRFLGLKVGLIQQNMTSEQRRENYMCDITYVTNSELGFDYLRDNLSVDELVVRNFNYCVIDEVDSILIDEARTPLIISGPAEKPSDQYYKAAKVAAAFERAIHYTVDEKQKNVLLTEQGYADAEEILDVKDLYDPRQQWASYILNAIKAKELFLKDVNYIIRGKEVLIVDEFTGRVMQGR…	0	142.086	0	29.666	30	124	29	3.458	94.46	24.6562	22	33	88.03	23.5756	21	30	66.26	19.8428	19	24	46.15	18.664	18	20	46.14	15.8153	16	17	1	1	1	1	1	5	WTSP	Detected by both ITAG and Atlas
Solyc01g080930	Enoyl-CoA-hydratase IPR001753 Crotonase, core	no hits	MAQSSSNNGGTDQVLVEERASVRTIILNRPKQLNALSFPMISRLLELFHASEGDSNVKMIILKGNGRSFCAGGDVTAVVRNVRQGNWKLGADYFREEFTLNYLMATYSKPQVSILNGIVMGGGLGASVHGRFRVATEKSVCAMPETALGLFPDVGASYFYSRLPGFFGEYAGLTGARLDGAEMLACGLATHFVPSERLPFLEQALAKVNTSDPYVISTIISRFSDMPKLKAESPYHKMKIIDRCFSRRTIEEIISSLENEALNKKDDWISSAIQSLKKASPTSLKISLRSIREGRLQGVGSCLVREYRMVCHVLRGEFSKDFFEGCRALLIDKDKNPKWEPSRLELIRDDDVDRYFSKIDDEDWEDLKLPPRSNLPPYAIAKL	0	8.4	0	8.09399	2	3	2	0.259	NA	0	NA	NA	2.87	3.91645	1	1	NA	0	NA	NA	6.32	8.09399	2	2	NA	0	NA	NA	0	1	0	1	0	2	CIP	ITAG only
Solyc01g081290	Pentatricopeptide repeat-containing protein (AHRD V1 ***- D7L173_ARALY); contains Interpro domain(s) IPR002290 Serine/threonine protein kinase	AT4G18750	MWNSIRDSGSSMSNLKTRFSLEECSRRLKKRCKEDDGLCCEVTVGSCGSRTRLAATAPPSGSSSISLCGRGVKRKIGCIEAATQMGRKNKIEDDYVMGEALGKGKFGSVFLCRSKATGVEFACKTLPKGEETVHKEVEIMQHLSGHPGVVTLHSVYEDAESFHLVMELCSGGRLIDEMTKEGRYSEQKSANIFKDLMLVIQYCHDMGVVHRDIKPENILLTASGKIKLADFGLAMRIANGQSLSGLAGSPAYVAPEVLTGDYGQKADIWSAGVLLHGLLVGVLPFQGDSLDALFEAIKSMQLDFHTEKWQSVSKLARDLLERILTRDVAARITAEEVLSHPWMMFYTERTLKMVSVRLKPKHFSGTPSQIPAITSRLESDGKKRCCKSLNGETNDLRCG…	0.03	1.923	41	0.520059	1	2	1	0.038	2.36	0.520059	1	1	2.29	0.520059	1	1	NA	0	NA	NA	NA	0	NA	NA	NA	0	NA	NA	0	0	0	1	1	2	WTSP	Atlas only
Solyc01g081300	Phosphoribosylaminoimidazole-succinocarboxamide synthase IPR001636 SAICAR synthetase	AT3G21110	MALPALNPPKTLNKKLQSLNSPFFSFSKTASFPKITKCKKYPLITMSSQQQSPPPHVALTNNDHKEELMRAIKSSITNCLSETHLDLTVPQLKSKIRGKVRDIYDGGDYLVMVTTDRQSAFDRILASIPFKGQVLNETSLWWFNKTQHITPNAVVSVPDKNVTIARKCSVFPVEFVVRGYVTGSTDTSLWTVYNKGVRNYCGNNLPDGLVKNQKLTENILTPTTKAADHDVPVTPDEIVQRGLMTQADYDEVSRRAMSLFEFGQHVALDHGLILVDTKYEFGKGPDGQIYLIDEVHTPDSSRYWIAHSYQERIQNGLEPENIDKEFLRLWFKSHCNPYEDEVLPDAPEELVSELAWRYIFLFETITNSRFEMPETKEPVHDRISRNVSQALSSLQ	0	46.631	0	29.1139	10	23	10	2.728	29.4	27.0886	8	10	16.79	13.1646	4	6	10.96	11.3924	4	4	2.34	2.02532	1	1	1.85	4.81013	2	2	1	1	1	1	1	5	WTSP	ITAG only
Solyc01g081470	Ubiquinone/menaquinone biosynthesis methyltransferase ubiE (AHRD V1 ***- D0N8X4_PHYIN); contains Interpro domain(s) IPR004033 UbiE/COQ5 methyltransferase	AT5G57300	MATLVRSVARSLRRKNLSSMYCPASTLQSHATSFGFKDVAEEEKSKMVGNVFTSVASNYDLMNDLMSGGLHRLWKDRLVSKLNPFPGMKHLDVAGGTGDVAFRILENIKNVKRRAMQDVLDDDMIEETRIYVCDINPNMLGVGKKRAEQRGFGLEKSLVWVEGDAEALSFEDNSMDGYTIAFGIRNVTHIEKVLAEAYRVLKRGGRFLCLELSHVDIPVYKDLYDVYSFSVIPAVGELVTGDRESYQYLVESVRRFPPQEQFAKMIADAGFQKVEYENLVGGVVAIHSGVKF	0	6.018	0	5.13699	1	5	1	0.166	NA	0	NA	NA	6.46	5.13699	1	2	3.07	5.13699	1	1	3.63	5.13699	1	1	2.52	5.13699	1	1	1	1	1	1	0	4	1 Peptide	Detected by both ITAG and Atlas
Solyc01g081480	Genomic DNA chromosome 5 P1 clone MVA3 (AHRD V1 **-- Q9FN84_ARATH)	AT5G17670	MNVVAWLSPCTTISSPNIFSCCSAISCQAESSLTTTTATAIRPAVILPGLGNNTNDYEKLALILKGYGVPTAIAKVSRIDWLRNAAGLLDTNYWRGTLQPRPVLDWYLKRIDEAVSEAKELAQGESGTLSLIGHSAGGWLARVYLQEFGSSDISLLLTLGTPHLPPPKGLPGVIDQTRGLLYYVEKNCGKAVYSPELRYVCIAGRYIQGSRFFDSSSTYSSEVMDGAEQPMSEVAAVSNTNAETETGSTFRTRFVGQGYKQVCGQADVWGDGVVPEVSAHLKGALNVTLEGVYHSPVGSDDATRPWYGSPAVVEQWIRHLLV	0	5.558	0	5.59006	2	6	2	0.52	1.93	1.86335	1	1	NA	0	NA	NA	5.36	5.59006	2	2	4.57	5.59006	2	2	2.59	3.72671	1	1	1	1	1	0	1	4	WTSP	Detected by both ITAG and Atlas
Solyc01g086900	RNA methyltransferase TrmH group 2 (AHRD V1 *-*- Q3M884_ANAVT); contains Interpro domain(s) IPR001537 tRNA/rRNA methyltransferase, SpoU	AT5G26880	MERAGLKTLNTVVSPLHFRAKASIFRPLLLPQVVHNLHFPLLSSSSRLSPLRSLCVRSDASTMLNGAGGVAAQNKLLQVVLVSPQIPGNTGSIARTCAASAVGLHLVEPLGFPIDNTKLKRAGLDYWPYVVVKVHRSWDEFREYFMGQAGEKRLLAFTKRGIATHSDFSYKKGDWLVFGSETKGLPPEALLDCKSESLGGGTLRIPMVETYVRCLNLSVSVGIAVYEASRQINYEQLQCPPDTCMDTETSFVTEDIFA	0	6.062	0	8.13953	2	5	2	0.468	1.97	3.87597	1	1	2.35	4.26357	1	1	3.16	4.26357	1	1	3.08	4.26357	1	1	2.52	4.26357	1	1	1	1	1	1	1	5	WTSP	Detected by both ITAG and Atlas
Solyc01g087040	Thylakoid lumenal 19 kDa protein, chloroplastic (AHRD V1 ***- TL19_ARATH); contains Interpro domain(s) IPR016123 Mog1/PsbP, alpha/beta/alpha sandwich	AT3G63540	MASILHPSSLLSSSSSTTTTTTKPPVSPPFSRPQSTLSPPSKPLLTTLTATAIATTILTTSLPSLADSPSSFNIYYGTAASAANYGGYGGNSDKKASAEYIYDVPDGWKERLVSKVEKGTNGTDSEFYNPKKKSEKEYLTYLAGFRQLAPKDVILNNLALSDVNLQDLIANADGVTSEERKDENGQLYYDYEIDGVLGHSLISVTCANNKLYAHFVNAPAPEWKKDEGILRHVHQSFKTVG	0	75.966	0	26.971	9	122	9	315.228	82.79	26.971	9	27	102.89	26.971	9	31	82.87	26.556	7	24	82.59	21.1618	7	24	51.85	26.556	7	16	1	1	1	1	1	5	WTSP	Detected by both ITAG and Atlas
Solyc01g087120	F1-ATP synthase delta subunit IPR000711 ATPase, F1 complex, OSCP_delta subunit	AT5G13450	MAMAGRIRSTLPHLRKALSSDSRSALYPAIISNPELSRNYATAPAAKEKKVKVPVTMYGVSGNYASALYISAVKANTLEKVESELLDLIAASKKSPKFSQFMKDLSVPTETRVKAMTDISSEAKFGDLTKNFLVVLAENGRLKHIDAIAKRFAELTMAHKGELKAIVTTVIPIPPEEEKELKETLQEVMGKGKKVNIEQKIDPSILGGLVIEFGQKVFDMSIRTRARQMERLLREPINF	0	9.69	0	15.4812	4	7	4	0.624	2.02	3.76569	1	1	2.12	3.76569	1	1	3.41	7.94979	2	2	4.71	7.94979	2	2	1.7	3.76569	1	1	1	1	1	1	1	5	CIP	ITAG only
Solyc01g087190	Chaperonin-like protein (AHRD V1 *-*- Q2LJI6_9NOSO); contains Interpro domain(s) IPR003435 Chaperonin-like RbcX	AT5G19855	MVGTISGSGRSLAETHSTPCLCLNPSRNSGSTNFRSNRELGLWRTFKGRKQLNLSSSFLEAWCEWRLSAKMVSLALNGGSRKRQKIRKLTVVGGLEVEDDDSGEDVKNEIINVITYKAVRTVLQQLYEMNPPQYTWFYNFIVNHVPNTGKNFLQQLFKEKRELAERVMITRLSLYSIWMQKCDHAELYNRISDENVELMRERLAQTVIWPSDDDQIAGSLD	0	6.374	0	8.1448	2	7	2	0.468	7.29	8.1448	2	3	4.98	8.1448	2	2	2.27	3.61991	1	1	NA	0	NA	NA	2.15	3.61991	1	1	1	0	1	1	1	4	WTSP	Detected by both ITAG and Atlas
Solyc01g087520	Ferredoxin-thioredoxin reductase variable chain (AHRD V1 *-*- B6UCW8_MAIZE); contains Interpro domain(s) IPR004207 Ferredoxin thioredoxin reductase, alpha chain	AT5G23440	MTASTSAFFSSSVLNIPNSKNQSLIIPSHKNILNPNPFPQIKIHKSRNPQKPNGYFISKSVIVDNPSTVSSTSSLSVDAGVDEKDAAAMGKVGSKVRVTVPLKVYHVPKVPELDLDGRTGTVKQYVAVHKGKQISANLPYKVEFVVDDLEGRSTPVKFSAHLKEDEFEFLD	0	14.226	0	24.5614	5	12	5	1.61	7.41	16.9591	3	3	7.8	16.9591	3	3	6.94	12.8655	3	3	4.12	4.09357	1	2	2.2	4.09357	1	1	1	1	1	1	1	5	WTSP	Detected by both ITAG and Atlas
Solyc01g087730	50S ribosomal protein L1 (AHRD V1 ***- A8YGI8_MICAE); contains Interpro domain(s) IPR005878 Ribosomal protein L1, bacterial-type	AT3G63490	MASTATPSTLTLSSIFSQELNPNSLIFKSKPLLFTSHKSFSLHPLSLQYKERKNGPLVVAAMAAEAEVEDAVEQEGEEGAVAVLIPPSKPKKGKAALPLKRDRTRSKRFLEIQKLREIKKEYDLKTAIELLKQTASLKFVETAEAHFRLNIDPKYNDQQLRATVNLPKGTGQTVKVAVLTQGEKFDEAKNAGADIVGGEDLIEQIKGGFMEFDKLIATPDMMPKVASLGRVLGPRGLMPNPKAGTVTTNIPQAIEEFKKGKVEYRADKTGIVHLPFGKANFSEEDLIINFIAAVKSVEANKPSGAKGVYWKSAHVCSSMGPSIRLNVREMLEYKLPNA	0	62.336	0	31.6568	10	38	10	3.489	48.73	29.8817	9	17	30.53	23.9645	7	10	5.44	8.87574	3	3	4.09	6.80473	2	2	5.44	12.7219	4	6	1	1	1	1	1	5	WTSP	Detected by both ITAG and Atlas
Solyc01g087750	Homology to unknown gene (Fragment) (AHRD V1 ***- Q015C3_OSTTA)	AT5G12470	MAAIATATTTFYLSTTSFSRHQSSTFRFSSLTYPINFSTFSLNAQFHPPRTSFPIFSALSNHHGGGNIDGGGGGGGGGGGDGGGKDDENAGERNKKEAIMALAEAERTLESLPKDLASAIEAGKIPPAVVHRFLELEKSPVLRWLLSFGGFRERLLADDLFLTKVAIECGIGIFTKSAAELEKRRENFTKELDFVCADVVMAIVADFMLVWLPAPTVGLRPSLAIGSGPLTKLFYNCPDNAFQVVLSGTSYSFLQRLGAIVRNGAKLFAVGSGASLVGTGVTNTLINARKAIDKTFAGEAENLPVLSSSAAYGVYMAVSSNLRYQILAGVIEQRILEPLLHKNKIMLGALCFVFRTGNTFLGSLMWVDFARWIGIQRSRE	0.003	3.465	4	2.63158	1	2	1	0.145	1.99	2.63158	1	1	2.4	2.63158	1	1	NA	0	NA	NA	NA	0	NA	NA	NA	0	NA	NA	0	0	0	1	1	2	WTSP	Detected by both ITAG and Atlas
Solyc01g088020	Protein transport protein sec31 IPR017986 WD40 repeat, region	AT3G63460	MACVKMVNRSASAAFAPEAPYLAAGTMAGAVDLSFSSTANLDIFEVDFVSDDQQLKLTGSIPSSERYNRLSWGKCQSNSEEFSYGIIAGGLVDGNIGLWNPKPLISNGSEAIESALVGNLSRHKGPVRGLEFNGFTPNLLASGADEGEICIWDIAKPSEPSHFPPLKGSGSSTQGEISYVSWNNKVQHILASTSLNGTTVVWDLKKQKPVISFTDSVRRRCSVLQWHPDVATQLIVASDEDGSPALRLWDMRNILSPVKEFVGHTKGVIAMSWCPLDSSYLLTCAKDNRTICWDVVSGEIVSELPAGTNWNFDVHWYPKCPGVISASSFDGKIGIYNIEGCGRAGDGEGYFGSAPLRAPKWWSKKKSGVSFGFGGKLVSFGSADGPTGPTEVHVHSIVT…	0.002	3.915	3	1.15658	1	1	1	0.083	NA	0	NA	NA	NA	0	NA	NA	NA	0	NA	NA	2.83	1.15658	1	1	NA	0	NA	NA	0	1	0	0	0	1	1 PSM	ITAG only
Solyc01g088080	T-complex protein theta subunit IPR012721 T-complex protein 1, theta subunit	AT3G03960	MQPYGIQSMLKEGHKHLSGLDEAVLKNIDACKQLSTITRTSLGPNGMNKMVINHLDKLFVTNDAATIVNELEVQHPAAKILVLAGKAQQEEIGDGANLTVSFAGELLQNAEELIRMGLHPSEIIIGYNKAINKTIELLDELVEAGSENMNVKDKNEVISRMKSAVASKQFGLEDVLCPLVAEACIQVCPKNPANFNVDNVRVAKLLGGGLHNSTIVRGMVLKSDAVGSIKRIEKAKVAVFVQGVDTSTTETKGTVLIHSAEQLENYAKTEEAKVEELIKSVADSGAKVIVSGAAVGEMALHFCERYKLMVLKISSKFELRRFCRTTGAVALLKLSQPNPDDLGHVDSVSVEEIGGVRVTVVRNEDGGNSVSTVVLRGSTDSILDDLERAVDDGVNTYKA…	0.002	3.985	3	2.21811	1	1	1	0.08	NA	0	NA	NA	NA	0	NA	NA	3.09	2.21811	1	1	NA	0	NA	NA	NA	0	NA	NA	0	0	1	0	0	1	1 PSM	ITAG only
Solyc01g088560	Ras-related protein Rab-6A IPR015600 Rab6-related	AT2G44610	MAPVSALAKYKLVFLGDQSVGKTSIITRFMYDKFDNTYQATIGIDFLSKTMYLEDRTVRLQLWDTAGQERFRSLIPSYIRDSSVAVIVYDVASRQSFLNTSKWIEEVRTERGSDVIIVLVGNKTDLVEKRQVSIEEGEAKARELNVMFIETSAKAGFNIKPLFRKIAAALPGMETLSSAKQEDMVDVNLKSSNSNAAQSQAQSGGCAC	0	8.669	0	12.0192	2	5	1	0.292	2.7	5.28846	1	1	2.8	6.73077	1	1	3.04	5.28846	1	1	2.54	5.28846	1	1	3.01	6.73077	1	1	1	0	0	1	0	2	Sporadic	ITAG only
Solyc01g088610	chaperonin (AHRD V1 ***- B5IMI3_9CHRO); contains Interpro domain(s) IPR001476 Chaperonin Cpn10	AT3G60210	MASTFLTLAKPFTSHSTNLPSFSPQRPIGLRRNSLRINAISQKWEPTKVVPQADRVLIRLEELPEKSAGGVLLPKSAVKFERYLMGEVLSVGSDVAQVETGKKVLFSDINAYEVDLGTDARHCFCKESELLALVE	0	20.786	0	31.8519	4	37	4	5.813	47.77	26.6667	3	15	11.65	25.1852	3	4	15.94	25.1852	3	6	11.1	25.1852	3	4	26.74	26.6667	3	8	1	1	1	1	1	5	WTSP	Detected by both ITAG and Atlas
Solyc01g088700	Eukaryotic translation initiation factor 4 gamma 1 (AHRD V1 *-*- A9QXE6_MESAU); contains Interpro domain(s) IPR016021 MIF4-like, type 1/2/3	AT3G60240	MSHNQSRADTRESSQYRRTARSGSFNQHRGGRGSGGGGGGAAPPPVSSTSNPSLTSNRSFNKKYYNAQGGQPRVSGVGAGSDSHLNGAHQQQPSHGVSDVSVAIAHTPLPSATVKPTDASTQKVTRAVPRAPTSNVVPPISESSAPVTPAKNPGDASKSFPLQFGSISPGVMNVLQIPARTSSAPPNLDEQKRAQARGDTSRAIPSLPNPSTSKQPMPRKDAGPLNQSNHSEAYGVANKPKRDVHILAPPPVTQTQKPSTHPMPGMHMQIPFHQPPQVPVQFGGPGPQIPSHSMSATSLPMPMHLPIVNPPMQQPMFVSNLQPHPMQSQGMMHQGQGLNFSSGIGAQLPQQLGNMGMNMPSQFSPQQAGKFLGQRKSVKITHPETHEELRLEERSHPNM…	0.048	1.59	68	0.720222	1	1	1	0.03	NA	0	NA	NA	NA	0	NA	NA	2.28	0.720222	1	1	NA	0	NA	NA	NA	0	NA	NA	0	0	1	0	0	1	1 Peptide	Atlas only
Solyc01g089870	Pentatricopeptide repeat-containing protein (AHRD V1 ***- D7KP29_ARALY); contains Interpro domain(s) IPR002885 Pentatricopeptide repeat	AT1G02150	MLLQPTTTVKPPHQKTEKYVSFSSSLSYSLSFPSGFCNLGGFTKPLMCSKNHHSVISCSSTSQVHSYGTVDYERRPIVKWNAIYKRISMNDGPERGSVSVLNQWENEGKKVTKWELSRVIKELRKFRRYKLAFEVYEWMNNRPERFRLTTSDTAIQLDLIAKVHGISSAEEYFDKLPDTLKDKRIYGSLLNAFVRSRKKEQAESLLDKMRNRGYTDHALPFNVMMTLYMNLKDYDKVESVVSEMKEKRIPLDIYSYNIWLSSCGSQGSIEKMEKVLEQMNLDTDINPNWTTFSTMATMYIKLGQMKKAEDSLKSVESRITGRDRIPYHYLISLYGSLGKKEDVLRIWKTYQSQFPNIPNLGYHSVISSLVRLDDIEGAEKIYDEWLPVKVHYDPRIGNL…	0	60.282	0	21.1009	11	40	11	2.831	40.9	14.8624	8	13	24.41	12.6606	6	7	22.32	12.2936	6	7	19.84	10.8257	5	6	20.98	10.4587	5	7	1	1	1	1	1	5	WTSP	Detected by both ITAG and Atlas
Solyc01g089970	Nucleoside diphosphate kinase IPR001564 Nucleoside diphosphate kinase, core	AT4G09320	MEQTFIMIKPDGVQRGLVGEIISRFEKKGFSLKGLKLITVDRAFAEKHYADLSAKPFFNGLVEYIVSGPVVAMVWEGKGVVATGRKIIGATNPLESAAGTIRGDFAIDIGRNVIHGSDAVESARKEIALWFPEGIAEWQSSLHSWIYE	0	29.752	0	42.5676	6	18	4	9	6.26	17.5676	2	2	22.61	32.4324	5	8	3.73	12.1622	2	2	10.09	31.0811	4	4	5.5	16.2162	2	2	1	1	1	1	1	5	WTSP	ITAG only
Solyc01g090200	Glycyl-tRNA synthetase beta subunit (AHRD V1 ***- D2PQC6_KRIFD); contains Interpro domain(s) IPR002311 Glycyl-tRNA synthetase, class IIc, beta subunit, N-terminal	AT3G48110	MAILVLPLITSILKPHKTHFSFLPLPIILHRRFFSKSSTVSALSTSSSSSHVSHNSENQKKASVPTFQQAIQRLQEYWGSVGCAVMQCSNTEVGAGTMNPLTYLRVLGPEPWNVAYVEPSIRPDDSRYGENPNRLQRHTQFQVILKPDPGNSQDLFIRSLSALGIDVNAHDIRFVEDNWESPVLGAWGLGWEVWMDGMEITQFTYFQQAGSIQLMPVSVEITYGLERILMSLQGVDHFKKIQYADGITYGELFLENEKEMSAYYLEHASVDHIHKHFDLFEAEARRLLDLGLAIPAYDQLLKTSHAFNVLDSRGFVGVTERARYFGRMRSLARQCAQLWLQTRESLGHPLGVVSHSDHLIVQREVSEEATGKVPSEPRLFVLEIGTEELPPNDVSSACK…	0	157.424	0	24.1282	30	174	30	8.067	149.02	17.4364	21	50	94.58	18.7559	22	38	96.84	17.4364	19	34	59.3	10.4618	11	22	81.29	14.2319	16	30	1	1	1	1	1	5	WTSP	Detected by both ITAG and Atlas
Solyc01g090470	Bfr2 IPR012617 TRAUB	AT5G61330	MSDDAENFDDDSDENNDYTDNDDDVDHYSNEDESGEQEEEEDEEGDQEEEEREKLTEEHKNAEMEELEKEYMELRHKEQDLLKNLTQHKDEDLLKGQAVKNQKALWDKTLELRFLLQKAFSNANRLPQEPIRSSFCDSEDTVEDAYTDLIASSRKTLDSILELQEVLLEKNPSITKSMDVNSGKRSKLLEDSVKSGEVDDDWQKISQMHSRMAAFRDKSIDKWQRKTQVTSGAAAIKGKLQAFNQDISQQVAGYMRDPSKMIKGMQQSRSAVALFGTVPDATGNGEGTNMDGDPELLDDSEFYQQLLREFFEAVDPASSETAFYALKRLQTKKRKIVDRRASKSRKIRYNIHEKIVNFMAPNQPVNLPEMAPKLFENLFSGGSTHRPLA	0.002	3.553	4	3.85604	1	1	1	0.129	NA	0	NA	NA	2.55	3.85604	1	1	NA	0	NA	NA	NA	0	NA	NA	NA	0	NA	NA	0	0	0	1	0	1	1 PSM	ITAG only
Solyc01g090670	Nuclear pore glycoprotein p62 (AHRD V1 *--- C0HBQ2_SALSA); contains Interpro domain(s) IPR007758 Nucleoporin, Nsp1-like, C-terminal	AT2G45000	MSTGFSFSSSTSPFSFSSNPSFTTTPSVAATTSASGSSPFSSPFANPNPTSSTPSFGFGTSTTSASSAPSFGFGSSTTSASSAPSFGFGSSTTSASSAPSFGFGSNTGASTPSFGFSSSAASGSSPQPTLFGSSSGSTTSASGSPLFGANSASAAANSSPFGSSLFGSSGTPSPGLFGSSSAAASNSGLGLFDSSPFLSSTTASTGNAASSASTTPFSSSLFVSSSSASSSPFGSSSTAPSFGFPSSAASLSFQSASNSASSSPGLSFASSAAASSFSSSSAFSFPGASPASSASSAPGFSLLSTSTTTSISSAPGFSLAAASTSSAVSSPAFSFSTSSSAASGPAISLSTPTPSAASPAPSFSFSMPAAASSSPSPFSASSSPSPFSVAKGTVSSVTA…	0.034	1.834	47	1.45119	1	1	1	0.166	NA	0	NA	NA	NA	0	NA	NA	NA	0	NA	NA	NA	0	NA	NA	2.45	1.45119	1	1	1	0	0	0	0	1	WTSP	Detected by both ITAG and Atlas
Solyc01g090700	Enoyl-CoA-hydratase (AHRD V1 ***- Q9SE41_AVIMR); contains Interpro domain(s) IPR001753 Crotonase, core	AT4G31810	MQSFKSTSILRRFLQKSRLVSQSRSFCGVSSNVLIDEPESTVLVEGKASSRTAILNRPHALNAINYSVASRLMKLYKNWEDDPDIGFVVLKGNDRAFSAGGDIVSLYNLLKQGNFQDCKEFCWTIYSLIYVVGTYLKPHVALLNGVTMGGGAGISIPGTFRIATEKTVFATPETLIGYHPDAGASFYLSRLPGYLGEYLALTGDKISGAEMISCGLATHYSHSAKIPLIEEQLGTLITDDPSVIERSLENWGEIVHPEPESILHRIETLDKCFSHDTVEEIIDALESEAAKQDAWCVATLRKLQETSPLSLKVSLRSIREGRHQTLDQCLRREYRMSVQALSGQITSDFREGVRARLVDRDLAPKWDPPTLEKVTDDMVDQYFSRLTAFEPELELPTQQ…	0	9.262	0	7.17822	2	3	2	0.389	3.09	3.46535	1	1	6.91	7.17822	2	2	NA	0	NA	NA	NA	0	NA	NA	NA	0	NA	NA	0	0	0	1	1	2	Sporadic	Detected by both ITAG and Atlas
Solyc01g091130	Nitroreductase IPR000415 Nitroreductase-like	AT1G02020	MPLLHHRFHLPFHRQPLFFFPTTTRKLIPMSTSSSQTTHQQEEDEEKQASLAQVLKYHKETKHSFNNYARGPRGLDWANQPNPFRRYVSSPLISLLHPPYSDESPLYSSLFKTLPFPKPLSDSTISQLFYDSLALSAWKSTGFSTWSLRVNPSSGNLHPTEACIICPPVESVSDKGFVAHYAPKEHSLEIRAQFSSGIFTRFFPENSFLIGLSSIFWREAWKYGERAFRYCNHDVGHAIAAVSMAAAGLGWDVKVLDGLGYEELEKLTGVENFPKFKIPSRPVKGSMPEIEFEHPDCVLLVFPSGLSEFKVAYKELSCAISDFSGLDWKGKPNVLSKEHICWDIIYRTAEAAKKPLTMSNLSVVDPFQSSGTFSESSYKDLSLRELVRKRRSAVDMDGS…	0	6.716	0	2.75527	1	2	0	0.093	NA	0	NA	NA	4.26	2.75527	1	1	3.54	2.75527	1	1	NA	0	NA	NA	NA	0	NA	NA	0	0	1	1	0	2	1 Peptide	ITAG only
Solyc01g091170	Agmatinase IPR016160 Aldehyde dehydrogenase, conserved site IPR006035 Ureohydrolase	AT4G08870	MKSAGSMGINYMQKLLTSNVPKEVVKRGQDRVVEASLTLIRERAKLKGELVRGLGGAVASTSLLGIPLGHNSSFLQGPAFAPPLIREAIWCGSTNSTTEEGKILDDQRVLTDVGDLPVQELRDTGIDDDRLMSTVSESVKLVMDENPLRPLVLGGDHSISYPVVRAVSEKLGGPVDILHLDAHPDIYDAFEGNKYSHASSFARIMEGGYARRLLQVGIRSINLEGREQGKRFGVEQYEMRTFSRDRQFLENLKLGEGVKGVYISVDVDCLDPAFAPGVSHFESGGLSFRDVLNILHNLQGDIVGADVVEYNPQRDTADGMTAMVAAKLVRELAAKMSK	0	45.749	0	27.2189	9	24	6	4.623	11.47	12.1302	3	4	34.27	27.2189	9	15	5.72	10.355	3	3	5.18	6.50888	2	2	NA	0	NA	NA	0	1	1	1	1	4	CIP	ITAG only
Solyc01g091190	3-phosphoshikimate 1-carboxyvinyltransferase (AHRD V1 ***- Q30CZ8_FAGSY); contains Interpro domain(s) IPR001986 3-phosphoshikimate 1-carboxyvinyltransferase, core	AT2G45300	MAQISSMAQGIQTLSLNSSNLSKTQKGPLVSNSLFFGSKKVTQISAKSLGVFKKDSVLRVVRKSSFRISASVATAEKPHEIVLEPIKDISGTVKLPGSKSLSNRILLLAALSEGRTVVDNLLSSDDIHYMLGALKTLGLHVEDDNENQRAIVEGCGGQFPVGKKSEEEIQLFLGNAGTAMRPLTAAVTVAGGHSRYVLDGVPRMRERPIGDLVDGLKQLGAEVDCSLGTNCPPVRIVSKGGLPGGKVKLSGSISSQYLTALLMAAPLALGDVEIEIIDKLISVPYVEMTLKLMERFGVFVEHSSGWDRFLVKGGQKYKSPGKAFVEGDASSASYFLAGAAVTGGTVTVEGCGTSSLQGDVKFAEVLEKMGAEVTWTENSVTVKGPPRNSSGMKHLRAID…	0	75.95	0	25.7692	11	55	7	3.642	41.72	20.1923	9	13	41.7	20.1923	9	14	30.05	13.0769	6	11	28.59	8.65385	4	10	19.01	10.9615	5	7	1	1	1	1	1	5	WTSP	Detected by both ITAG and Atlas
Solyc01g091530	Fasciclin-like arabinogalactan protein 13 IPR000782 FAS1 domain	AT3G60900	MTTLHFFLFTLLTVSVHAHNITEILNKFPEYSVFNSYLSQTKLADEINSRETITVLALPNGAMSAIVDKHPLSVIKNVLSLHVLLDYFDGTKLHKISDGTTTSTTLYQTTGNAHGNIGSVNITDLKGGKVGFGSAIPNSPLASTYTKSVKQIQYNISVLEVSAPIIAPGILTAPAPSGDFNITGALEKAGCKTFASLLVKSGVLKTYQTAIEKGLTIFAPNDEAFKGAKVPDLSDLSSADVVSLLQYHAIPSYTPIGTLKTTKDPISTLATNGASKYDLAVSTEGDQVTLDTGVDSSRIASTVIDSTPFCIFTVDSVLLPVELYGKAPSPAPGPAPETSPTPAPAPAPEASSPTPMMSPPAPPTSSPAGSPADSPTADSENSTAKKNAGNVNTPALLKA…	0	9.763	0	10.1449	3	9	3	0.778	NA	0	NA	NA	13.7	10.1449	3	5	NA	0	NA	NA	8.7	10.1449	3	4	NA	0	NA	NA	0	1	0	1	0	2	Sporadic	ITAG only
Solyc01g091580	Signal recognition particle-docking protein FtsY (AHRD V1 ***- A7H885_ANADF); contains Interpro domain(s) IPR004390 Cell division transporter substrate-binding protein FtsY	AT2G45770	MASTLSSRLPRLPSKTVFPHSNSGSTLLHFTSKTRFDQSRFRCSAGQTGFFTKLGRLLKEKAKSDVEKLFSGFSKTRDNLAVIDELLLYWNLSDTDRVLDELEEVLLVADFGPKITIKIVESLREDIYAGKIKSGSEIKSVLKKSILDLLTSKAPKTELSLGFRKPAVIMIVGVNGGGKTTSLGKLANRLKREGAKILLAAGDTFRAAASDQLEIWAERTGCEIVVAEKEKAKASSVISQAVKRGKEEGFDIVLCDTSGRLHTNYSLMEELVACKKVVSKIVNGAPNEILLVLDGTTGLNMLPQAREFNEVVGITGLILTKLDGSARGGCVVSVVDELGIPVKFVGVGEGVDDLQPFNAEEFVDAIFP	0	13.174	0	12.2283	4	9	4	0.551	5.07	5.43478	2	2	3.33	3.53261	1	1	0	1.90217	1	1	5.21	8.69565	3	3	5.55	5.70652	2	2	1	1	1	1	1	5	WTSP	Detected by both ITAG and Atlas
Solyc01g091780	Fructosamine kinase family protein (AHRD V1 ***- D7LS54_ARALY); contains Interpro domain(s) IPR016477 Fructosamine/Ketosamine-3-kinase	AT3G61080	MAVALLGSISFSSSMPSISSPSLQHPFNFNKHKPLIVAAMSDDPVREWILSEGKATKIKGISPIGGGCINRATRYDTDAGSFFVKTNRSIGPSMFEGEALSLNAMYETGSIRVPKPYKVGSLPTGGSYIIMEFIEFGASRGNQSALGRKLAEMHKAAKSEKGFGFHVDNTIGSTPQINTWMSDWVEFFAEHRLGYQLKMAREQYGDPIIYERGQRLARNLGPLFKNVVIEPCLLHGDLWSGNMTYDKNGEPVILDPACYYGHNEAEFGMSWCAGFGGDFYKAYFEVMPEQPGFEERRDLYMLYHYLNHYNLFGSGYRSSAMSIIDDYLRMLNV	0	14.478	0	12.6126	4	12	4	1.154	9.77	12.6126	4	4	4.26	5.70571	2	2	7.61	9.30931	3	3	4.87	5.70571	2	2	2.35	2.4024	1	1	1	1	1	1	1	5	WTSP	Detected by both ITAG and Atlas
Solyc01g094010	CXE carboxylesterase IPR013094 Alpha_beta hydrolase fold-3	AT2G45600	MAEQKIIAESTMEDAYKFLKITPNPDGSLTRNTPVPNVPSTPEIDPNSSNQLISLSKDIPLNPASNTFIRLYRPVSPPINTKLPLIIYFHGGGFVLLSVSSVIFHESCNAMSAQIPALIASVEYRLAPEHRLPAAYEDAVDAIKWAKDQAINGGDPWLKQLADFSKVFLMGSSSGGNIVYNAGLRAFNINLDPIKIVGLIMNQPYFGGVERTKSELKFVNDKILPLHANDLMWSLALPEGVDRDHEYSNPLINEVEVKKKIERLPRCLIRGYGGDPLIDKQKKFAKMIESRGVHVTPQFLETGYHAVEIFDKKRAQDLYDSIKDFVKSICDENVGKSAM	0.002	4.074	3	3.53982	1	1	1	0.166	NA	0	NA	NA	2.17	3.53982	1	1	NA	0	NA	NA	NA	0	NA	NA	NA	0	NA	NA	0	0	0	1	0	1	1 PSM	ITAG only
Solyc01g094200	NAD-dependent malic enzyme 2 IPR012302 Malic enzyme, NAD-binding	AT4G00570	MWRVARSAASTFRRTRRLSTAISAPCIVHKRGADILHDPWFNKDTGFPMTERDRLGLRGLLPPRVISFEQQYDRFMESFRSLEKNTEGQPESVVSLAKWRILNRLHDRNETLYYRVLIDNIKDFAPIIYTPTVGLVCQNYSGLFRRPRGMYFSAKDKGEMMSMIFNWPSTQVDMIVLTDGSRILGLGDLGVQGIGIPIGKLDMYVAAAGINPQRVLPVMLDVGTNNQKLLEDPLYLGLRQPRLEGEEYLSIVDEFVEAVHARWPKAVVQFEDFQAKWAFETLDRYRKKFCMFNDDIQGTAGVALAGLLGTVRAQGRPLTDFANQKIVVVGAGSAGLGVLKMALQAVSRMAGPSADPHFFLLDKNGLITKDRKDIDPAALPFAKAHHEIEGLGLQEGAGL…	0	21.016	0	9.15141	4	7	4	0.374	2.91	2.49584	1	1	8.3	6.3228	3	3	2.87	2.49584	1	1	7.16	5.32446	2	2	NA	0	NA	NA	0	1	1	1	1	4	CIP	ITAG only
Solyc01g094280	FolD bifunctional protein (AHRD V1 ***- B6TJF9_MAIZE); contains Interpro domain(s) IPR000672 Tetrahydrofolate dehydrogenase/cyclohydrolase	AT4G00620	MASSPITMMKMKLNNCSPPSTAAAAARFLPLLGPHQIRFRSSVAPLYNPSFPRTIITRPTFSSSSIITAAMANEALVKVIDGKKVAKDVRDEINAEITRMKDSIGVVPGLAVILVGDRKDSATYVRNKKKACETAGIKSYEVCLPENSTEEEVLKYISDFNDDPMVHGILVQLPLPSHMDEEKILHAVCIEKDVDGFHPLNIGQLAMRGREPLFIPCTPKGCIELLHRYNVEIKGKKAVVIGRSNIVGMPAALLLQREDATVSIVHSRTTNPEEITREADIIIAAVGKPNMVRGSWIKPGAVIIDVGINPVEDATNPRGYRLVGDVCYEEAIKVASAITPVPGGVGPMTIAMLLSNTLLSAKRINNFK	0	21.134	0	14.4022	4	14	4	0.995	8.13	11.413	3	3	5.11	7.06522	2	2	12.35	10.5978	3	4	5.22	6.79348	2	2	8.54	6.25	2	3	1	1	1	1	1	5	WTSP	Detected by both ITAG and Atlas
Solyc01g094290	Glutathione-regulated potassium-efflux system protein (AHRD V1 *-*- B3CM92_WOLPP); contains Interpro domain(s) IPR004771 K+/H+ exchanger	AT1G01790	MGFAYCLWQPNASHCGETLNYSKKSSCDVGLKHKLLGNARVICRNRPGRRLKRIVGCSNSSLAYSRIRLSCALWKSDSSGNLAGVKDSRGVKLLRCQENDSLAFIDGNGRNVESSESAEEGSVSVSANGIAEISSAKELEEDKGEEKEGDNLDELRELLQKALKDLEVAQLNSTMFEEKAQKISEAAIALKDEAANAWDDVNKQLESIEEMVVEEMIAKDAVQKATMALSLAEARLLVALDSIQSAKQGRMSSKTSDESKGEESTSLMEEETALSAAQEDMEECRDRLENCEAILRRLQNKKEELQKEADRLNDLAEEAQINALKAEEDVSNIMLLAEQAVAYELEATQRVNDAEIALQKAEKNLAVSPLDTAETSVVQNGSSALGQVSVDGTLCEDEV…	0	42.511	0	8.93155	9	18	9	0.708	15.64	3.17195	3	4	21.35	5.25876	5	6	11.98	2.08681	2	3	6.27	1.91987	2	2	10.09	2.08681	2	3	1	1	1	1	1	5	WTSP	Detected by both ITAG and Atlas
Solyc01g094340	Acetyl-coenzyme A carboxylase carboxyl transferase subunit alpha (AHRD V1 *-*- A0YRC5_LYNSP); contains Interpro domain(s) IPR001095 Acetyl-CoA carboxylase, alpha subunit	AT2G38040	MSSLSLAVGNCGKGRNAENLSSEFVPHSSLGSEFLTKRLYGLNLKDLGSPKVRTRKKFRIAAEIKKWKKQDYPWHGDIDPDTKTPLKYLSYFKPLDEKLKPVTLAFEKPLVNLEKQLIEVRRMAEDTGLDFTDQIYALEAKYQQALRDLYTHLTPIQRLQIARHPNRPTVLDHILNMTEKWVELHGDRAGYDDPAMVTGIGSIEGRSYLFIGHQKGRNTKENIMRNFAMPTPHGYRKALRMMKYADHHGFPIVTFVDTPGAFADLRSEELGQGEAIAYNLRAMFGLKVPIITVVTGEGGSGGALAIGCANKLLMLENSAFYVASPEACAAILWKSSQAAPKAAEKLRITAQEHYRLRIADGIIPEPLGGAHADPFWASQQIKHAILDAMAELGRMNSEQ…	0	39.979	0	16.9655	10	19	9	0.753	16.86	11.8621	7	7	11.76	8.27586	5	5	6.81	4.55172	2	2	4.47	3.17241	2	2	8.88	6.06897	3	3	1	1	1	1	1	5	WTSP	Detected by both ITAG and Atlas
Solyc01g094500	Riboflavin biosynthesis protein ribD (AHRD V1 ***- B6TRH4_MAIZE); contains Interpro domain(s) IPR004794 Riboflavin biosynthesis protein RibD	AT4G20960	MYCCPLSPSKQRPYSTAHFLSPSATYFGICNASKRLSISLINLGNESEQSVTTSRLNYGFRLATKRVSISLTSSGNGDRLVNVRCGELAVEHDDGFYIRRCVEIARKAVGHTSPNPMVGCVIVKDGKIVGEGFHPKAGQPHAEVYALRDAGDLAEKATAFVSLEPCNHYGRTPPCTEALIKAKVKKVVVGMVDPNPIVASTGVSRLRDAGIEVITGVEEELCRKLNEAYIHQMLTGKPFVTLRYSLSVDGGLSDQLGAEVTESGGYYSKLLQEYDAVVVSSFLLSTKHSVLSSKEPGAKQPLQIVLAKSSGSLQLPAVTAISSKTIIFSDEDIVMELEASQRGIETVVFDRMNLTAILEHCKRQGLCNVMLDLRGNSAEFEEILQEGFEQNLFQKVIVE…	0	14.434	0	8.42825	3	9	3	0.52	7.59	8.42825	3	3	11.26	6.37813	2	4	2.88	2.73349	1	1	NA	0	NA	NA	2.76	2.73349	1	1	1	0	1	1	1	4	WTSP	Detected by both ITAG and Atlas
Solyc01g094790	Cysteine synthase IPR005859 Cysteine synthase A	AT3G61440	MASLSRFLKKRSLDYNNVDLMRAASNRLFSTQLPHTNIKSEVSQLIGKTPMVYLKKVTEGCGAYIAVKQEMFQPTSSIKDRPALAMINDAEKKGLISPEKTTLIEPTSGNMGISMAFMAAMKGYKMVLTMPSYTSMERRVTMRAFGADLILTDPTKGMGGTVKKAYDLLESTPNAFMLQQFSNPANTQVHFDTTGPEIWEESLGNVDIFVMGIGSGGTVTGVGQYLKSKNPNVKIYGLEPTESNILNGGKPGPHHITGNGVGFKPDILDMDLMEEVLMVSSEDAVNMARELAVKEGLMVGISSGANTVAALRLAQKPENKGKLIVTVHASFGERYLSSVLYQDLRKEAENMQPISVD	0	32.091	0	18.7675	6	14	5	1.955	NA	0	NA	NA	23.6	18.7675	6	7	11.27	7.0028	3	4	8.93	10.3641	3	3	NA	0	NA	NA	0	1	1	1	0	3	WTSP	ITAG only
Solyc01g095000	Homology to unknown gene (AHRD V1 *-*- Q019E6_OSTTA)	AT2G46100	MATFTSFASIKIPYLQSGDRRSIFRPNSSKKILKLPRCNVENSTSNSSNNTSTSSQDSESENLLLKMAWYGSEFLGIAASIFRSPAGTEAPSEGNLELATDGSGLVDRALVVDNIKDDFQRSYFVTGNLTLNAYEDKCEFADPAGSFKGLSRFKRNCTNFGYLVETSNMKLMKWEDFEDKAIGHWRFSCILSFPWKPILSATGYTEYYFNEKSGKVCRHIEHWNVPKMALLKQIIRPSRGEKASG	0.001	4.517	1	5.30612	1	2	1	0.212	3.06	5.30612	1	1	NA	0	NA	NA	3.11	5.30612	1	1	NA	0	NA	NA	NA	0	NA	NA	0	0	1	0	1	2	WTSP	Detected by both ITAG and Atlas
Solyc01g095120	Alpha/beta hydrolase fold (AHRD V1 **-- A4FFA2_SACEN); contains Interpro domain(s) IPR000073 Alpha/beta hydrolase fold-1	AT3G61540	MRALHSSLIKPLIRLHCPFSTPIISLSPLRKQFPYLHSSATTSLQKLTAMADNKTAAVDGNFTSDHVSDAWYSVPDLRLRDHRFTVPLDYSIDRCSSTKITVFAREVVAVGKEEQSLPYLLYLQGGPGFECPRPTEAGGWISRACEEYRVVLMDQRGTGLSTPLTPSSMSQVNSAEDLANYLRHFRADNIVHDAEFIRKRLVPDAGPWTILGQSFGGFCAVTYLSFAPKGLKQALITGGLPPIGEGCTADSVYKAGFEQLVCQNEKYYKRFPQDIEIVRDVVNYLAESGGGVPLPSGGILTPRGLQLLGLSGLGSSTGFERLHYLFERVWDPLIVQGAKRRISDYFLNAYERWIGFDANPLYALLHESIYCQGASSLWSAHRIRALNDNKFDAIEAAKV…	0	5.916	0	3.6965	2	3	2	0.222	3	3.6965	2	2	2.73	2.33463	1	1	NA	0	NA	NA	NA	0	NA	NA	NA	0	NA	NA	0	0	0	1	1	2	Sporadic	Detected by both ITAG and Atlas
Solyc01g095150	Late embryogenesis abundant protein (Fragment) IPR013990 Water Stress and Hypersensitive response	AT2G46140	MDLIDKAKNFVSEKIANMEKPEATITDVDLKGIGFDGLAFHAKVSVKNPYSVPIPIMEIDYVLKSATRVIASGRIPDPGSIKANDSTMLDVPVKVPHSVLVSLVRDIGGDWDVDYTLELGLIIDIPVIGNITIPLSYSGEYKLPTLSDLWKGGKEEEKKEDEEEKEDPSKVVEI	0	5.079	0	9.77011	1	1	1	0.233	3.82	9.77011	1	1	NA	0	NA	NA	NA	0	NA	NA	NA	0	NA	NA	NA	0	NA	NA	0	0	0	0	1	1	1 PSM	ITAG only
Solyc01g095160	Pentatricopeptide repeat-containing protein (AHRD V1 ***- D7MB20_ARALY); contains Interpro domain(s) IPR002885 Pentatricopeptide repeat	AT4G37170	MRANLRASVKLTSHSFSPHIHSACTIRSSSSFSTAHKEKTFFQPANKDQMITRLCNENKFNEALQMLCEQRRLKEAIQLLERPETRPSATVFSTLLRICIDNRALEEGKRVHKIMKCSGFRPGVVISNRVLDFYCKCDKPFDAQNLFVEMPERDLCSWNIMVSGFAKLGLIDEARKLFDEMPEKDNFSWTAMISGYVRHNKPECALELYRVMLRDENFKCNKFTISSALAASASIQSLRLGKEIYGHIVRTGLDSDAVVWSALSDMYGKCGSVDEARHIFDRTKDKDVVSWTAMIDRYFGDGRWEEGYLLFSCLMYSGIRPNDFTFAGVLNACAHQTKEHFGKQVHGYMMRIGFDPLSFAASTLVHMYAKCGSVDSAYKVFKRLPKPDVVSWTSLINGY…	0.043	1.684	61	1.29496	1	1	1	0.07	NA	0	NA	NA	NA	0	NA	NA	NA	0	NA	NA	NA	0	NA	NA	2.36	1.29496	1	1	1	0	0	0	0	1	1 PSM	Atlas only
Solyc01g095430	Threonine endopeptidase (AHRD V1 **-- B6TCN7_MAIZE)	AT4G01150	MAAAAAASTSMAATAVFASPFPLSSTTKAAPARCSALPYLPSRLSAIAFPSSLKIAEPKRSSLLQVKASSSEESGAVDTSELLTDLKEKWDALDNKSTVIVYGGGAIVAVWLSSIVVSAINSVPLLPKIMELVGLGYSGWFVYRYLLFKSSRKELAEDIEQLKKKIAGTE	0	8.485	0	6.47059	2	5	2	2.162	3.19	6.47059	1	1	3.31	6.47059	1	1	NA	0	NA	NA	3.25	5.88235	1	1	5.38	6.47059	1	2	1	1	0	1	1	4	WTSP	Detected by both ITAG and Atlas
Solyc01g095510	Mitochondrial carrier family (AHRD V1 ***- C1E2Y0_9CHLO); contains Interpro domain(s) IPR002113 Adenine nucleotide translocator 1	AT2G46320	MVGSSSTKQGLSSWIGAATATRTSVEFDKNVAVSGGDSPSHSDNFTDVNMGFGDRAMSAAGAAVLSAILVNPLDVAKTRLQAQAAGVPYDSLCNLGHLNSNTVLTGVKYNSAGTRAVLGAEPTCSPECFRYKGTLDVFYKVIRQEGFTKLWRGTNASLTLAIPSVAIYLPLYDIFRNTIEEYTLCNIPIATAYVPLVAGSLARSIACITCYPVELARTRMQAFKDTKNGVKPPGVWKTLVGVVSPVNSVNSFQNSIQSYRLLWTGLGAQLARDVPFSAICWSTLEPVRRKLLGMVGDEASATTVFGANFSAGFVAGILAASATCPLDVARTRRQIENDPERALRMTTRQTLVEIWRDGGFKGFFAGVGPRVARAGPSVGIVVSFYEVVKYCLSHRHMHQ…	0.016	2.098	22	3.20197	1	1	1	0.145	NA	0	NA	NA	NA	0	NA	NA	NA	0	NA	NA	NA	0	NA	NA	2.97	3.20197	1	1	1	0	0	0	0	1	1 Peptide	Detected by both ITAG and Atlas
Solyc01g095650	Histone H3 IPR000164 Histone H3	AT1G01370	MARTKHLAKRSRTTSAAPSATPSTPSRKSPRSAPATSVQKPKQKKRYRPGTVALREIRHFQKTWDLLIPAAPFIRLVREISHFYAPGVTRWQAEALIAIQEAAEDFLVHLFEDAMLCAIHAKRVTLMKKDFELARRLGGKGQPW	0.017	1.802	41	6.25	1	1	0	0.468	NA	0	NA	NA	NA	0	NA	NA	NA	0	NA	NA	2.31	6.25	1	1	NA	0	NA	NA	0	1	0	0	0	1	1 PSM	ITAG only
Solyc01g095670	Rhodanese-related sulfurtransferase (AHRD V1 *--- A0NUG1_9RHOB); contains Interpro domain(s) IPR001763 Rhodanese-like	AT3G25480	MEAINAVRLTPLSVRSDRKNEAKKIPSHPISFPFKNLCSVENLSRNVQGGLVLVSSVLNTGLAKALTYEETIEQSETIPGAEFDATAVVETVTTFASENPIIIAGGFAALALPIVLFQVLGKPPKSWGVESAKTAYAKLADDAGAQLLDIRATAELREVGTPDIRGLKKKPVTVVYKAEDKTGFLKKLSLKFKEPENTTLFILDKFDGNSELVAELVTENGFKAAYAIKDGAEGPRGWLNSSLPWILPKKTLGLDLSNLSDALDGVLGEGSDAVTVGLGVAAATGLGILAFSEVETILQLLGSAALVQLVSKKLLFAEDRKKTLQQVDEFLTTKVAPKELVDEIKQIGKALLPDSVSSNALPAPVEASPAAATSTVEETESVPKEDIAPPKVEAISPPT…	0	16.108	0	9.27602	4	11	4	0.624	2.26	1.58371	1	1	8.03	7.46606	3	3	7.67	6.33484	3	3	3.81	4.75113	2	2	3.94	3.39367	2	2	1	1	1	1	1	5	WTSP	Detected by both ITAG and Atlas
Solyc01g095690	Pentatricopeptide repeat-containing protein (AHRD V1 ***- D7KIA6_ARALY); contains Interpro domain(s) IPR002885 Pentatricopeptide repeat	AT4G01030	MEAVATPLYHFISPLNQKQPRCYSTNFGLVNVAETLPESSLSTSLESLSSLQFDYENKFNSLNSVRAMHAKMIKLSNEWDTKKNMQYFISGYLEFGDFQSAAVLFFVGFAENYLYWNSFLEEYTYFGGTPCEILEVFSELHSKGVNFNTEILAFVLKICSKLRDMWLGLEVHACLIKKGFDLDVYTKCALMNFYGRCCGTESANKVFKETSMHDSLLWNEAILVNLRNEKWTEGLQMFRDMQDLFVKANSLTISKVLQACGKLGALDEGKQIHGYVIRYALESNILIRTALINMYVKNDNIKLARVVFASTDNRNLPCWNSIISGYTALGYLDDAWELFHEMKTCNIKPDIITWNSLLSGHFLHGSYREVLAIVTRMQSAGYQPNRNSITSALQAVSEL…	0	5.211	0	2.62055	2	2	2	0.11	2.15	0.838574	1	1	2.98	1.78197	1	1	NA	0	NA	NA	NA	0	NA	NA	NA	0	NA	NA	0	0	0	1	1	2	WTSP	Detected by both ITAG and Atlas
Solyc01g095740	ATP-dependent RNA helicase DBP4 (AHRD V1 *-** C1GZM0_PARBA); contains Interpro domain(s) IPR011545 DNA/RNA helicase, DEAD/DEAH box type, N-terminal	AT5G08610	MPLKLLPQLRFFNPTFPLTHFPTMKCNSTLKPKTIPAFSRMFPHKLKYRSIAFPILAAQEQELRRFSSRSGRPRPGSGADVRVSKSLIEDEAELSDWVSGLRSDSSFTKTQVYSESDDNEGDRERGRGRFSNRRNGGEDRGEKRRRDDDFSGPGRRGGGPMQSNSRNGGRFGSEYSGGRGAGRGGMQSNSRNEGRFGNDRGSRYEGGRGDGGRDRKESSSRGGRFGSDVRSGSEGRRSGGRDRMESFSKGGRFGSDNGRESEGRRSGGQDRTESLPRKGGRFGSEMASSSDNRGKSRIGSGYGRDMAAQGGNGRLGRKEGAGMGRGSSMLLDEDDTDNEDDEEEEENGYKGFRDLIDSEEESEESDEDNEVEDEKMASLEEDSPRASSPSSHGKSDSHL…	0	13.568	0	6.66667	4	6	4	0.182	13.65	6.66667	4	4	6.49	3.7931	2	2	NA	0	NA	NA	NA	0	NA	NA	NA	0	NA	NA	0	0	0	1	1	2	Sporadic	Detected by both ITAG and Atlas
Solyc01g096390	DNA-directed RNA polymerase IPR006592 RNA polymerase, N-terminal	AT2G40030	MCLDRVFRVNINLASITRDLNAIQEVLPTFSVRRKQETQCGTDLMEEKSLSSKVSDGIVKRIKFGLATPQEICKSSISDCPITHPSLLLNPFLGLPLEAGRCESCGTAEPGQCEGHFGYIELPIPIYHPDHVSELKKMLSLLCLKCLKMKNRKFQVKNAGVLERMLSSCCEDVSQVSVYEGKTSDGASYLELKVPKNAAKLQEWNFLEKYGYRYGDGYSRPLLPSEVLAILRRIREDTRKKLSAKGYFPQEGYILQYLPVPPNCLSVPDISDGNNIMSSDHSITMLRKVLRQIDIIKSSRSGTPNFEAHEVEANDLQAAVVQYLQFRGTGKASRDVDKRFGIHKEAADTTTKAWLEKMKTLFIRKGSGFSSRSVITGDPYKGVGEIGLPCEIAQKITFE…	0.002	4.134	3	0.834327	1	1	1	0.027	NA	0	NA	NA	3.22	0.834327	1	1	NA	0	NA	NA	NA	0	NA	NA	NA	0	NA	NA	0	0	0	1	0	1	1 PSM	ITAG only
Solyc01g096400	Unknown Protein (AHRD V1)	no hits	MSSLSCQWLSGPYAYPSGRFCNLSSSNTSLAGFTIYCSNSQFTPRAPGPESSKNDLKFVLHDALDASGVNTTHARIAREGFCSQIQKLSNIERETSICINRGVDLGKAALHIAAEDDSLVSHSSVPLPVDDFLERLDHLSMGYCSRYSSSFTSSPEHFIHCLEKYLYVNKGFRRTGATNQSEPRALYLHSVLTHRSGSASLLSLLYSEILKMLRLWGFLSFDIEVFFPHDSSSTPRGYCKQKTKESDQSHVMTTQSLLQEMLKDLKDAFWPFQLDHTKSPFLRAARAANCSESTNDSDESAFELASVKAALHRLERGVWTSVRFGDMRRALSACERLILLQTEPKELRDYGALLYHCGFYKESLHYLTVYQDGQKESLDLIDNVEEEEALEKLMIRLNL…	0	11.117	0	6.61939	2	6	2	0.259	3.05	2.60047	1	2	3.4	4.01891	1	1	4.27	4.01891	1	1	3.94	4.01891	1	1	4.29	4.01891	1	1	1	1	1	1	1	5	WTSP	Detected by both ITAG and Atlas
Solyc01g096430	Predicted NADPH-dependent FMN reductase IPR005025 NADPH-dependent FMN reductase	AT3G27890	MAAQPVIKVAGLCGSLRKGSYNRGLLNAAMEICKDSITGMEIEYVDISPLPFLNTDLEVDGTYPPVVEAFRKKIEEADCFLFASPEYNYSITGPLKNAIDWASRPPNVWADKAAAMVSAGGGFGGGRSQYHLRQIGVFLDLHFINKPEFFLNAFQQPPKFDSDGVLTDEETKQRLRAVLLALQALSLKLKGKCE	0.002	3.407	4	6.18557	1	2	1	0.334	NA	0	NA	NA	NA	0	NA	NA	2.72	6.18557	1	1	2.51	6.18557	1	1	NA	0	NA	NA	0	1	1	0	0	2	1 Peptide	ITAG only
Solyc01g096480	Thioredoxin protein (AHRD V1 ***- Q6JE37_NICBE); contains Interpro domain(s) IPR013766 Thioredoxin domain	AT3G06730	MQAASLAFHPPALRTSPSYLSSKLPHHLNYSLFKHAPSTSTLSLTQVLSRNTICKPPAVGKYVREDYLVKKLSAKEIQELIKGERNVPLIIDFYATWCGPCILMAQELEMLAVEYENNALIVKVDTDDEYEFARDMQVRGLPTLYFISPDSSKDAIRTEGLIPIQMMRDIIDNDL	0	13.188	0	24.5714	4	12	4	1.31	5.11	10.2857	2	2	10.09	24.5714	4	4	5.74	10.2857	2	2	4.93	10.2857	2	2	5.41	10.2857	2	2	1	1	1	1	1	5	WTSP	Detected by both ITAG and Atlas
Solyc01g096540	AT5g06970_MOJ9_14 IPR008528 Protein of unknown function DUF810	AT5G06970	MEEENSIELLQRFRRDRRILLNFILSGSLIKKVAMPPGAVSLEDVDLDQVSVDFVLNCARKGGLLELSEAIRDYHDSTLFPHMSNAGSTDEFFLATNPEQSGLPPRRLPPPVPISTPSPILPTLSTSESIDTEPFEELSSLSKSQSLSSTQQQELTVDDIEDFDDDDDLDEVDSRRYSRRVLNDAADLMLGLPSFATAIGDDDLRETAYEILLAAAGASGGLIVPSKDKKKEKKSRLMRKLGRSKSENVMTQSQHLSGLVSLLETMRVQMEISEAMDVRTRLGLLNAMVGKVGKRMDTILIPLELLCCISRSEFSDKKSYFKWQKRQLNMLEEGLINHPAVGFGESGRKANELRVLLAKIEESESFPPPAAEMQRTECLKSLREIAMPLAERPARGDLT…	0.002	2.973	5	1.08108	1	1	1	0	NA	0	NA	NA	2.08	1.08108	1	1	NA	0	NA	NA	NA	0	NA	NA	NA	0	NA	NA	0	0	0	1	0	1	1 PSM	ITAG only
Solyc01g096580	30S ribosomal protein S10 IPR005729 Ribosomal protein S10, eukaryotic_archaeal	AT3G47370	MKPTKPGLEEPAEMVHKIRITLSSKNVKNLEKVCADLVRGAKDKRLRVKGPVRMPTKVLNITTRKSPCGEGTNTWDRFELRVHKRVIDLFSSPDVVKQITSITIEPGVEVEVTIAES	0.005	2.122	11	10.2564	1	2	0	0.468	2.57	10.2564	1	1	2.42	10.2564	1	1	NA	0	NA	NA	NA	0	NA	NA	NA	0	NA	NA	0	0	0	1	1	2	1 Peptide	ITAG only
Solyc01g096660	Genomic DNA chromosome 5 P1 clone MOJ9 (AHRD V1 ***- Q9FL44_ARATH)	AT5G07020	MACAALSANSCTIASSSTGRLSFSTYQKDSKLRQRHSLVRFRVRASTDDSDCNAEECAPDKEVGKVSMEWVAMDNTKVVGTFPPRKPRGWTGYVEKDTAGQTNIYSVEPAVYVAESAISSGTAGTSSDGAENTKAISAGIALISVAAASSILLQVGKNSPPPIQTVEYRGPSLSYYINKLKPAEIVQASITEAPTAPETEEVAITPEVESSAPEAPAPQVEVQSEAPQDTSSSSSNIS	0	24.015	0	17.6471	4	51	4	4.623	12.59	17.6471	4	6	17.5	17.6471	4	7	30.86	17.6471	4	13	34.07	17.6471	4	13	31.15	17.6471	4	12	1	1	1	1	1	5	WTSP	Detected by both ITAG and Atlas
Solyc01g096870	Prolyl-tRNA synthetase (AHRD V1 **** Q7XZD2_RAPSA); contains Interpro domain(s) IPR004499 Prolyl-tRNA synthetase, class IIa, prokaryotic-type	AT5G52520	MGALRLPALTSIFTSSSSVRSSPAILPLKHRLRLPLRRPFSAQSTTEKVVAPELGDGKGKVVDKEKDRVITPRSQDFNAWYLDVIANAELADYGPVRGTMVIRPYGYAIWEAIQEYMNVKFKETGHSNMYFPQFIPYSFIEKEASHVEGFSPELALVTVGGGKELEEKLVVRPTSETIVNHMFTQWIHSYRDLPLMINQWANVTRWEMRTKPFIRTLEFLWQEGHTAHATAEEAEEEAMQMIDVYTKFAYEQAAIPVIAGRKSRVETFAGASTTYTIEAMMGDRKALQAGTSHNLGQNFSRAFGTQFTDENGQRQHVWQTSWAISTRFVGGIIMTHGDDAGLLLPPRLAPVQVIIVPIWKKDNEKAGVLTASSSVKESLQAAGIKVKIDDSDQRTPGWK…	0	117.579	0	34.7349	17	120	17	9	95.79	28.702	14	29	62.36	27.6051	14	21	78.11	27.2395	13	24	64.52	29.2505	12	20	80.97	27.0567	12	26	1	1	1	1	1	5	WTSP	Detected by both ITAG and Atlas
Solyc01g096900	DNA gyrase subunit A family protein (AHRD V1 ***- D7L923_ARALY); contains Interpro domain(s) IPR005743 DNA gyrase, subunit A	AT3G10690	MKLHTLNPQTSFVQSNSMAFSTGIRLLRCYHHQFTFTAIPSRFSGLRKASSELRFLSSVTPSRKHVRPVSARRKVTEEEVGEEGNGSVVLRDRDGNEGGGGERIVHTELHKEATEAYMSYAMSVLLGRALPDVRDGLKPVHRRILYAMHELGLSSKKPYKKSARVVGEVLGKFHPHGDNAVYDSLVRMAQDFSLRSPLIRGHGNFGSIDADPPAAMRYTECRLEALTEAMLLADLEQNTVDFVPNFDNSQKEPSLLPARIPNLLLNGASGIAVGMATNIPPHNLGELVDALSALIHNPEATLQELLEYMPGPDFPTGGIIMGNIGILEAYRTGRGRVVIRGKTDIELLDAKTKRAAIIIQEIPYQTNKASLVEKIADLVENKTLEGVSDIRDESDRSGM…	0	43.713	0	10.808	10	27	10	0.882	25.08	7.34523	6	8	22.26	5.87618	4	6	7.42	3.25289	3	3	19.05	8.07975	7	7	9.77	3.77754	3	3	1	1	1	1	1	5	WTSP	Detected by both ITAG and Atlas
Solyc01g097010	Nucleic acid binding protein IPR018111 K Homology, type 1, subgroup	AT3G04610	MVLQGLLREHEVMISAREEPESSHPPAIDGLLRVHRRVVDGLENDSSHPPPAVAGKVSTKLLVPASQAGSLIGKQGTTVKSIQEASSCIVRVLGTEDLPMFALQDDRIVEVVGEPVGVHKAVELIASHLRKFLVDRGIIPVFEMQMQMPPNPPAEHMPPPQTWGPPPQAFPQSAAGGPGYGNSPHFMPPSRQHDNYYPPADMPPPMEKQPHQGISAYGREAPMSMHSSSNNPAAPSLITQITQQMQIPLAFADAVIGTNGASISYIRRVSGATVTIQETKGVPGEMTVEINGTASQVQTAQQLIQNFMADAGAPQPQTGPPADQGYNPYGAPPPSMYSSAPSNAGVPGQSGGYGSMYGNNYGY	0	5.653	0	2.75482	1	3	1	0.468	2.57	2.75482	1	1	2.99	2.75482	1	2	NA	0	NA	NA	NA	0	NA	NA	NA	0	NA	NA	0	0	0	1	1	2	1 Peptide	ITAG only
Solyc01g097160	FAD dependent oxidoreductase (AHRD V1 ***- B7G7N7_PHATR); contains Interpro domain(s) IPR006076 FAD dependent oxidoreductase	AT3G04650	MNSACNNPLLSSSFLHQPLKSSRFPNVSIFFPIISNPITPNRCIPIKTTIKGSMESRNPTKGRSTSPRKFKPRYGTSRRSTIKKSLSQEQVNFTKPIPDDPVVGIIGGGMSGLTCALYLEKRGIRSTVFDTGIHGLGGRMGTRMIDHQPLIFDHAAQFFTVTNPKFAELVDDWLKRGLVREWKGTIGELEVGGNFVPFPSSPPKYIGVNGMRPLADSLLSQTSLVNVVRPCWVSALEPFNGTWHLSEKGKPCGQFDAIVIAHNGKCANRLLAASGLPLIAKQMKRLELSSIWALLAAFEDPLPTALNAASLPFEGAFVKGVESVSWMANNTKKLLASDSGPQCWTFFSTATFGKQNKVPQESIPNATGEKVKEAMLEGVEKALGLSKSSLQKPFYTKLQ…	0	23.235	0	14.4	7	15	7	4.012	4.61	5.2	2	2	3.97	5	2	2	11.38	10	4	4	14.4	11.4	5	5	5.22	5	2	2	1	1	1	1	1	5	WTSP	Detected by both ITAG and Atlas
Solyc01g097310	Sec-independent protein translocase protein tatA/E homolog (AHRD V1 *-*- D7DW94_NOSA0); contains Interpro domain(s) IPR006312 Twin-arginine translocation protein TatA/E	AT5G28750	MAAIISSGAAVTTTLSLSFTPKPISSSSSSSAPKIQTLCSSSSLFFNSNSQLFLGPPTTTRKVRSNSKRGLSCYCLFGLGVPELAVIAGVAALVFGPKQLPEVGRNIGKTVKSFQQAAKEFESELKKEPDASAQPPVEKAIEVSHEEKQDTKVPSTKESS	0	17.578	0	16.875	4	15	4	9	11.33	12.5	3	4	11.46	16.875	4	5	4.45	8.125	1	1	7.71	12.5	3	3	4.9	8.125	2	2	1	1	1	1	1	5	WTSP	Detected by both ITAG and Atlas
Solyc01g097340	NAD-dependent epimerase_dehydratase family protein-like protein-binding domain	AT5G28840	MGSSGGIDYGSYTYENLEREPYWPSEKLRISITGAGGFIASHIARRLKSEGHYIIASDWKKNEHMTEDMFCHEFHLADLRVMDNCLKVTKGVDHVFNLAADMGGMGFIQSNHSVIFYNNTMISFNMMEAARINSVKRFFYASSACIYPEFKQLETNVSLKEADAWPAEPQDAYGLEKLATEELCKHYNKDFGIECRIGRFHNIYGPFGTWKGGREKAPAAFCRKAQTATDKFEMWGDGLQTRSFTFIDECVEGVLRLTKSDFREPVNIGSDEMVSMNEMAEMVLSFEDKKLPVQHIPGPEGVRGRNSDNTLIKEKLGWAPTMRLKDGLRITYFWIKEQIEKEKSQGVDTATYGSSKVVGTQAPVELGSLRAADGKE	0	27.804	0	23.4043	7	27	3	1.512	16.84	9.57447	3	6	16.43	13.8298	4	6	12.23	14.3617	4	5	17.44	19.9468	6	7	7.66	12.234	3	3	1	1	1	1	1	5	CIP	ITAG only
Solyc01g097460	Ribose-5-phosphate isomerase (AHRD V1 ***- A8IRQ1_CHLRE); contains Interpro domain(s) IPR004788 Ribose 5-phosphate isomerase	AT3G04790	MASLSLISPHSPSSSSSSTLRHSSIIGTRLPSIFLRNPTIRIRSTTPSIKAFSAPVPSPLTQDELKKLAADKAVEYVKSGMVLGLGTGSTAAFVVAKLGELLSSGQLTNIVGVPTSKRTEEQALSLNIPLSTLDDHPHIDLAIDGADEVDPNLDLVKGRGGALLREKMVEAASDKFVVVVDDSKLVSGLGGSGLAMPVEVVQFCWKYNLVRLQELFKEEGVDAKLRLDGNGKPYVTDNSNYIVDLYFKTPIRDSAAAGKEIASFEGVVEHGLFLDMTTAVIIAGKEGVSVKSK	0	112.336	0	32.0819	11	246	11	33.551	335.55	32.0819	10	83	230.95	22.5256	5	56	146.58	28.3276	9	42	130.56	24.2321	7	41	81.25	16.7235	5	24	1	1	1	1	1	5	WTSP	Detected by both ITAG and Atlas
Solyc01g097520	Annexin 11 IPR009118 Annexin, type plant	AT2G38750	MAEANSYAALTKAFSGLGVDENLFISTLGKWNRHQRESYRVSTPGFFREDKRQFQRWDDQHILQLRQEFLRLKDAVVLYTMHPWERDARLFKEALLLQVPKHDVLIEIACTRSSEDLLGARKAYHSLFEHSIEEDIAFHVRSSERKLLVALVSSYRYEGPRVNDDLAKSEAKIFVNAIKNANKKKLIDEDEEIVRILSTRSKLHLKAIYSHYKEITGNFLDEDLECDLTLKQVVQCLCIPKAYFSKILIASLRLDVDESAKDSVTRVIVSRADDDDMQQIKEEFQSKYGTTLAEKIAEVANGSYKDFLLTIIAKSE	0.002	3.147	5	3.16456	1	1	1	0.116	NA	0	NA	NA	NA	0	NA	NA	NA	0	NA	NA	2.29	3.16456	1	1	NA	0	NA	NA	0	1	0	0	0	1	1 PSM	ITAG only
Solyc01g097770	Serine_threonine protein kinase IPR002290 Serine_threonine protein kinase	AT3G45780	MENQRRSIDVFDPASTHDGANLASSSRNEGIDVQEISVKGAESASRTGTDKLINKWMAFDLKGNDQNDNADSQIPGETSISERAAEWGLTVRTDVGEGSFHAISRSGQNSFADGERSKNSLEKNSVGSTRTSEESNLGAEFPRVSQDLKDALATLQQTFVVSDATKPDCPIVYASSGFFTMTGYSSKEIVGRNCRFLQGKDTDQNEVAKIRDAVKTGKSYCGRLLNYKKNGTPFWNLLTVTPIKDDSGKTIKFIGMQVEVSKYTEGVNEKELRPNGLPKSLIRYDARQKEKALGSITEVVQTVKGPRSHIKSSQDASSGTDKEKPQVDFMLPKAADTESNISTPGRYTPQWDARGDVSQELGKKSRKSSRLSLKGSKGRPSSISFPLENEENVGPEIIM…	0	7.056	0	2.30366	2	5	2	0.174	NA	0	NA	NA	2.21	1.36126	1	1	2.28	1.36126	1	1	7.04	2.30366	2	3	NA	0	NA	NA	0	1	1	1	0	3	CIP	ITAG only
Solyc01g097810	Zeta-carotene desaturase	AT3G04870	MATSSAYLSCPATSATGKKHVFPNGSPGFLVFGGTRLSNRLVTRKSVIRADLDSMVSDMSTNAPKGLFPPEPEHYRGPKLKVAIIGAGLAGMSTAVELLDQGHEVDIYESRTFIGGKVGSFVDRRGNHIEMGLHVFFGCYNNLFRLLKKVGAEKNLLVKEHTHTFVNKGGEIGELDFRFPVGAPLHGINAFLSTNQLKIYDKARNAVALALSPVVRALVDPDGALQQIRDLDNVSFSEWFLSKGGTRASIQRMWDPVAYALGFIDCDNMSARCMLTIFALFATKTEASLLRMLKGSPDVYLSGPIKKYIMDKGGRFHLRWGCREVLYETSSDGSMYVSGLAMSKATQKKIVKADAYVAACDVPGIKRLVPQKWRELEFFDNIYKLVGVPVVTVQLRYNG…	0	88.009	0	31.6327	18	70	18	5.918	46.6	20.068	11	17	58.49	30.102	16	20	36.05	15.4762	7	11	30.55	18.7075	9	11	31.42	14.2857	7	11	1	1	1	1	1	5	WTSP	Detected by both ITAG and Atlas
Solyc01g097820	SOUL heme-binding protein IPR018790 Protein of unknown function DUF2358	AT3G04890	MKKMLSYIIPKTMGYMKPEIRQRKMAGMCCYSSLSQTLIKKKLQGGFYCCSPAPNNQKVKTQTPKLLKIAVSGVTELLRLLSSSSTNRLGISDDEGGGEPLVYNVEDVLKIIKLDYEKAYFVTGLFTSGIYAEDCVFEDPTIKFRGRDLYSRNLQLLVPFFDSPSIKLEKIEKGNDSNAGVIVAYWKLRTSLKLPWQPLISVDGKTVYDLDEQLKIVKHVESWNISALEAVGQIFTPGLRSSGSYSLRTA	0	6.001	0	8.8	2	3	2	0.52	2.6	4	1	1	0	4	1	1	NA	0	NA	NA	2.08	4.8	1	1	NA	0	NA	NA	0	1	0	1	1	3	WTSP	ITAG only
Solyc01g097860	Membrane protein (AHRD V1 *-*- A8JG04_CHLRE); contains Interpro domain(s) IPR010903 Protein of unknown function DUF1517	AT1G54520	MAAAPFLLESNLKWNPLFYTPNPIQCTRLIHYQKLTPSKFSKTSKLTVKCFSKNHKNVCFNDGNGLEVKNKENPFEIVVKSVMKALKALQKPAVAAVLVGLLLMAVCLLLLEKLVCSSYRSLQKDLNRIAEVADTSTPEGLSFVLTETTLALLRHPGYCISAYSSVDVKRSMEEGENRFNQLSIEERGKFDEETLVNVNNIRRKSSTSQRATGFSNEYIVVTILVAAEGAYKLPTINGSGDLKEALQKIASIPSSRTLAVEILWTPQNENDTLSERQLLEDYPLLRPL	0.003	3.609	4	4.16667	1	1	1	0.179	NA	0	NA	NA	NA	0	NA	NA	NA	0	NA	NA	3.39	4.16667	1	1	NA	0	NA	NA	0	1	0	0	0	1	WTSP	Detected by both ITAG and Atlas
Solyc01g098000	Elongation factor-like protein IPR014038 Translation elongation factor EF1B, beta and delta chains, guanine nucleotide exchange	AT1G30230	MAVAFQNVNSESGLKKLDDFLLTRSYISGYQASKDDITVYSYLAKPPSAEYVNALRWYKHIDALLRISGVSGVGAGVIVEGSAPITGAVATPPADDSKASAADDDDDDDDVDLFGEETEEEKKAAEERAAALKASGKKKESGKSSVLMDVKPWDDETDMKKLEEAVRSVTMEGLTFGASKLVPVGYGIKKLQIMLTIVDDLVSVDDLIENYLTVEPINEYVQSCDIVAFNKICKISAVLKF	0	23.477	0	19.917	4	14	2	2.594	17.49	14.5228	3	7	13.68	19.917	4	5	2.48	3.73444	1	1	0	3.73444	1	1	NA	0	NA	NA	0	0	1	1	1	3	CIP	ITAG only
Solyc01g098020	Acetyltransferase GNAT family protein expressed IPR000182 GCN5-related N-acetyltransferase	AT3G22560	MDSSKITLRPYRSTDVDDVLSWASDDRITLSTHFSTLTSNEAALNFINNSSIPWRRSICIDDRSIGLVVARPGSGDDRCRAEIGYVLGFEYWGQGITTEAVKMAIPLILEEFPEIVRLQALSNAEHKASHRVLEKAGFTKDGTLRKYLYFKGEIKDVVLYSFLSFH	0.002	2.825	5	9.03614	1	1	0	0.389	NA	0	NA	NA	2.47	9.03614	1	1	NA	0	NA	NA	NA	0	NA	NA	NA	0	NA	NA	0	0	0	1	0	1	1 PSM	ITAG only
Solyc01g098380	Dihydrodipicolinate reductase family protein (AHRD V1 **** D7LKV2_ARALY); contains Interpro domain(s) IPR011859 Dihydrodipicolinate reductase, plant	AT2G44040	MWAIIKVPLYINGGGMRYSSSSKNGCNSFVRGRKYSVKMCSAPAQNVEVLVKSKIEPLPIMVNGCTGKMGRAVLEASIAAGLQPVPICFGGPQDEGKTVEAGGKEIIVHGPSDRENLLSSVFEEHPNLIVVDYTLPAAVNDNAELYCKVGVPFVMGTTGGDREKLYKTVVDSKVYAVISPQMGKQVVAFLAAMEIMAEQFPGAFSGYSLQVMESHQASKLDTSGTAKAVISCFENLGVSFDLDKVQLIRDPVQQVEMVGVPEEYLLGHAFHMYHLTSPDGTVSFEFQHNVCGRSIYAEGTVDAILFLAKKVKLKEEKRIYDMIDVLREGNMR	0	21.753	0	15.9639	5	19	5	1.512	11.33	11.1446	4	4	17.92	15.9639	4	6	11.33	10.8434	3	4	2.81	3.31325	1	1	12.08	8.13253	2	4	1	1	1	1	1	5	WTSP	Detected by both ITAG and Atlas
Solyc01g098550	Tryptophan synthase alpha chain (AHRD V1 ***- Q8LA83_ARATH); contains Interpro domain(s) IPR002028 Tryptophan synthase, alpha chain	AT3G54640	MSFHSYTTVRPYLTPSPSASPLFLHFQVERRFGDGMASFLKATHFIHSSNNHQNHPFSQSYTQTIKISTSRKPLMAALSATATVGLSETFTRLKEQGKVALIPYITAGDPDLATTAEALKVLDRCGSDIIELGVPYSDPLADGPVIQAAASRSLTKGTNFAKVISMLEDVVPQLSCPIALFTYYNPILKRGTEKFMATVRDTGVHGLVVPDVPLEETEMLRKEAARHNIELVLLTTPTTPKIRMKAITEASEGFVYLVSAVGVTGARASVSSKVQSLLLDIKEATSKPVAVGFGISKPEHVKQVAEWGADGVIVGSAMVRILGEAKSPEEGLKELEVFTTSLKSALS	0	26.843	0	11.8156	4	19	4	2.162	19.31	11.8156	4	5	16.67	9.2219	3	4	12.82	9.2219	2	3	10.84	7.20461	2	3	12.91	9.2219	3	4	1	1	1	1	1	5	WTSP	Detected by both ITAG and Atlas
Solyc01g098610	Glutathione synthetase (AHRD V1 **** Q6F4I7_ZINEL); contains Interpro domain(s) IPR005615 Glutathione synthase, eukaryotic	AT5G27380	MGSGCSSPSISLTTIATSHFQSQESLSNSLNFYSPTRFLEPHLLKSSKIFIPKSPLKCAKVPEMQTQLEDSAKPIVDPHDIDSKLVQKLANDALVWCSLRGLLVGDRNSERSGTIPGVDMVHAPVALIPMSFPESHWKQACEVAPIFNELVDRVSQDGEFLQQSLSRTRKADPFTSRLLEIHSKMLEINKLEEIRLGLHRSDYMLDEQTKLLLQIELNTISSSFPGLSCLVSELHRSLLQQYREDIASDPNRIPANNAVNQFAEALAKAWNEYGDPRAVIIFVVQAEERNMYDQHWLSASLRERHQVTTIRKTLAEIDALGELQQDGTLVVDGQAVAVIYFRAGYAPSDYHSESEWKARLLMEQSRAVKCPSISYHLAGSKKIQQELAKPNVLERFLEN…	0	53.34	0	21.978	9	29	9	1.683	25.81	16.1172	7	9	14.47	10.989	5	6	14.88	11.3553	5	6	11.22	9.70696	4	4	10.21	6.77656	3	4	1	1	1	1	1	5	WTSP	Detected by both ITAG and Atlas
Solyc01g098640	UPF0603 protein At1g54780, chloroplastic (AHRD V1 **-- U603_ARATH); contains Interpro domain(s) IPR007621 Protein of unknown function DUF477	AT1G54780	METILSPPFSPLFNPKTSLSKPFLSLPHLPRSTKSICCSLRKQYSQTEKQSFSVPKSWVSHVQQGLAAIAISLALNFCPVVSSDSALASEFDVLNEGPPKDSYVVDDAGVLSRVTKSDLKALLSDVEKRKGFHINFITVRKLTSKADAFEYADQVLEKWYPSVEQGNDKGIVVLVTSQKEGAITGGPDFVKAVGDTVLDATVSENLPVLATEEKYNEAVFSTARRLVAAIDGLPDPGGPQLKDNKRESNFKSREETDEKRGQFTLVVGGLLVIAFVVPMAQYYAYVSKK	0	42.333	0	33.218	10	34	10	5.31	20.7	23.5294	8	8	28.54	23.1834	8	11	7.44	11.4187	4	4	13.77	14.1869	3	5	17.36	14.1869	4	6	1	1	1	1	1	5	WTSP	Detected by both ITAG and Atlas
Solyc01g098930	Cyclin IPR012389 Negative regulatory factor PREG	AT3G05327	MIMGAEGFGTKSGISKTYTNMGLNEYDRGDKGNPKILWIVASVIERSVQKNEKGLKGSNKRGVVTVFHGTRAPVLTVQQYIERIFKYSNCSPSCFVVAYIYLERFLNLTDCLLTSLNVHRLLITSIMLAVKFVDDDCYNNAYYAKVGGITTRELNKLEVKFLAALDFRLHVSVESFDKYCLQLEKDSNEKLQIDRPIRIFAWGKGLVNKNISNGSPTVGGYSCRAF	0.017	1.83	40	7.07965	1	1	1	0.166	NA	0	NA	NA	0	7.07965	1	1	NA	0	NA	NA	NA	0	NA	NA	NA	0	NA	NA	0	0	0	1	0	1	1 PSM	ITAG only
Solyc01g098990	Os06g0146300 protein (Fragment) (AHRD V1 ***- Q0DEL6_ORYSJ); contains Interpro domain(s) IPR018962 Domain of unknown function DUF1995	AT5G27560	MASALYSSLSWCCTPIPKPSFKTPFSSSIYPLNTRGFSGISLHKSVPSSRTHAKFDKFQGQENLEPDPQLQTVEEEDQEEDDSRVELLIPQLQFLDDEGAQAELWELSRTFLETLIEETGCERVKAIFPDAGAAALLKYRWKDATFEFASLGDRKPVSKEDEIVVMVVPDYQMLEYVEKIASDLSDDPPRPLIMWNPRLISEDVGVGINVRRLRRNFLSTFTVAYSMRPLPDGAVFRCYPGLWKVFYDDKDRPNRYLLAKEQISRPTIEDLEIIYGGVDEKEDKGPSLLNQAAGIFSSINRFMKVISR	0	10.251	0	7.46753	2	14	2	1.512	10.41	7.46753	2	5	2.19	7.46753	2	2	8.49	3.57143	1	3	3.07	3.57143	1	2	5.82	3.57143	1	2	1	1	1	1	1	5	WTSP	Detected by both ITAG and Atlas
Solyc01g099110	Xaa-pro aminopeptidase (AHRD V1 **-- A1DF27_NEOFI); contains Interpro domain(s) IPR000994 Peptidase M24, structural domain	AT3G05350	MDSSLSVSTTMLTCSSKLHHYPPRSFRFLTFSLPIFRKLGICPKFLSKSPKLTVRSSSSITAKPSWEFQKKDSGKEQDNKLRALREIFTGPGVNVDAYIIPSQDAHQSEFIAECYMRRAYISGFTGSAGTAVVTKDKAALWTDGRYFLQAEKQLNSSWDLMRAGNMGVPTPSQWLNTVLAPGCRIGIDPFLFSSDAAKEFKEDISKGNHELVFLYDFNLVDEIWKESRPNPPKEPIRLHDLKYAGVNVSSKLSCLRSELRNAGASAIVISMLDEIAWLLNLRGNDIRHSPVMYAYLVVEIDGAKLFVDDTKVTPEVMEHLTNAGIELRAYESILSEIESLAAKGANLWLDTSSVNAAIVNAYESACYKYPWDSATKSRKKRNANLNSNGQSGGPCAVYR…	0	96.869	0	24.611	16	57	16	4.736	68	18.2461	12	21	26.51	14.71	9	9	40.08	15.1344	9	13	26.27	12.8713	7	9	12.11	4.9505	3	5	1	1	1	1	1	5	WTSP	Detected by both ITAG and Atlas
Solyc01g099180	Lipoxygenase IPR001246 Lipoxygenase, plant	AT3G22400	MHAITGKDDGKRVKGKVVLMKKNVLDFTGIMAAVVDDVAELLGEKVSFQLISSSVFDDREGKLSNPAYLENWITNITPIIAGESTFSVTFDWDRNEFGVPGAFIIKNFHLNEFFLKSLTLEDVPNHGKIHFVCNSWVYPAFRYKSDRIFFANQAYLPSETPQPLRKYRENELETLRGDGTGKLEEWDRVYDYAYYNDLGDPDKGEEYARPVLGGSSEYPYPRRGRTGREPTKTDPNCESRIPLFMGSDIYVPRDERFGHLKMSDFLTVYLKSIAQSFLPAFKALFDNTPNEFDSFEDVLKLYEGGVKLPEGPLLKAITDTIPLEILKDVFHSDGEGLFKFPTPQVIQEDKTAWRMDEEFGREILAGINPVLITRLQEFPPKSNLDPNIYGNQNSTITRE…	0	5.631	0	3.62998	2	2	2	0.099	NA	0	NA	NA	2.76	1.99063	1	1	NA	0	NA	NA	2.34	1.63934	1	1	NA	0	NA	NA	0	1	0	1	0	2	Sporadic	ITAG only
Solyc01g099240	3-hydroxyisobutyrate dehydrogenase IPR015815 3-hydroxyacid dehydrogenase_reductase	AT4G29120	MATAVDPSNTRLGWIGTGVMGRSMCAHLINAGYTLTVFTRTPSKAQELISMGAHWVDTPKAVASQSDVVFSIVGYPSDVRQVILDPNSGALSGLRQGGVIIDMTTSEPSLAVEIHSAASAAGCSAIDAPVSGGDRGARNAALSIFAGGEESIVQRLNPLFNLLGKVYYMGAPGKGQFTKLGNQVVIASSMVGLCEGLIYAHKAGLDLNHFVDAISTGAAGSKSLDLYGSRILNRDLEPGFYVNHFVKDLGICLRECQNMGLALPGLALAQQLYLSLKAHGEGDLGTQALILALERINNLSLQSEASAIGKP	0.002	3.928	3	4.82315	1	1	1	0.179	NA	0	NA	NA	NA	0	NA	NA	NA	0	NA	NA	2.65	4.82315	1	1	NA	0	NA	NA	0	1	0	0	0	1	1 PSM	ITAG only
Solyc01g099350	Acyl-CoA binding protein 4 acyl-CoA-binding domain 4 (AHRD V1 **-* D7L3U2_ARALY); contains Interpro domain(s) IPR015915 Kelch-type beta propeller	AT5G27630	MAMARVSSGLAYPERFYAAASYAGFDGSSDSSTKGVSSKFSNDAALLLYALYQQATVGPCKIPKPRSWSPVEQSKWTSWNGLGNMVSTEAMRLFVKILEEEDPGWYSRASNFVSEPAVQGEKNNETITEPVTENGNVLPEIKTIPAEKGSLSEPQDKDVVSEGSGAVGVYDQWVSPPISGPRPKPRYEHGAAVIDDKMYIFGGNHNGRYLSDLQALDLRSWTWSKIEVKSSGEASQAPVAPFAGHSLIPWGGNKLISIGGHTKDPSETMQVKVFDLQTHTWSNLKTYGKPPLSRGGHSVTLTGTSLVIFGGQDANRSLLNDLHILDLETMTWDEMDTLGVAPSPRSDHAAAVHAERYLLIFGGGSHATCFNDLHVLDLQTMEWSTPTQQGEIPSPRAGH…	0.011	2.366	15	2.24215	1	1	1	0.075	NA	0	NA	NA	NA	0	NA	NA	NA	0	NA	NA	3.28	2.24215	1	1	NA	0	NA	NA	0	1	0	0	0	1	1 PSM	Detected by both ITAG and Atlas
Solyc01g099690	ATP-dependent Clp protease proteolytic subunit (AHRD V1 ***- B9RFA9_RICCO); contains Interpro domain(s) IPR001907 Peptidase S14, ClpP	AT1G09130	MATCLRLPMASSIPCSSSSSMTLKHRSFNFRCAAYSNSSSNIPMPPFNPKDPFLSKLASVAANNPDALFSRPQNSDMPPFLDIYDSPKLMATPAQVERSVSYNEHRASTPPPDLPSMLLHGRIVYIGMPLVSAVTELVIAELMYLQYMDPKAPIYLYINSTGTTRDDGETVGMEAEGFAIYDSMMQLQNEIHTVAVGAAIGQACLLLAAGTKGKRFMMPHAKAMIQQPRAPSSGLMQASDVYIRAKEVLVNRDNLVKLLAKHTENSEETVSNVMRRPYYMDSIKAREFGVIDKILWRGQEQEQIIASVDAPEVWDNRAGIKVADAF	0	66.032	0	35.5828	10	62	10	12.895	39.14	27.6074	8	14	34.83	23.0061	6	12	44.51	25.4601	7	14	40.17	23.3129	6	12	31.06	21.4724	5	10	1	1	1	1	1	5	WTSP	Detected by both ITAG and Atlas
Solyc01g099740	Small nuclear ribonucleoprotein sm IPR006649 Like-Sm ribonucleoprotein, eukaryotic and archaea-type, core	AT5G27720	MLPLSLLKTAQGHPMLVELKNGETYNGHLVNCDTWMNIHLREVICTSKDGDRFWRMPECYIRGNTIKYLRVPDEVIDKVQEETKSRGDRKPPGVGGRGRGRGGRDEGGAAGRQGKGIGRGMEDAGAKGRGKGGPGAKSGGKGMKCGGRGRG	0	6.811	0	9.27152	1	1	0	0.259	NA	0	NA	NA	3.66	9.27152	1	1	NA	0	NA	NA	NA	0	NA	NA	NA	0	NA	NA	0	0	0	1	0	1	1 PSM	ITAG only
Solyc01g099770	Translationally-controlled tumor protein homolog IPR001983 Translationally controlled tumour-associated TCTP	AT3G16640	MLVYQDLLTGDELLSDSFPYKEVENGVLWEVQGKWVVQGAVDVNIGANPSAEGGCEDEGVDDQAVRVVDIVDTFRLQEQPAFDKKQFVTFMKRYIKNLTPKLEGETQEAFKKNIEAATKFLLQKIKDLQFFVGESMHDDGALVFAYYKEGSADPTFLYIAPGLKEIKC	0	8.558	0	20.2381	3	7	1	0.931	2.05	5.35714	1	1	5.19	14.881	2	2	2.75	5.35714	1	1	8.4	20.2381	3	3	NA	0	NA	NA	0	1	1	1	1	4	CIP	ITAG only
Solyc01g099900	Ribosomal protein L18 IPR000039 Ribosomal protein L18e	AT2G47570	MGIDLKAGGKSKKTKRTAPKSDDVYLKLLVKLYRFLARRTGSKFNAVILKRLFMSKINKPPLSLSRLISYAEGKGDKTVVLVGTVTDDVRAYEVPKLKVCALKFTKTARARIEKAGGECLTFDQLALRAPLGQNTLLLRGPKNAREAVKHFGPAPGVPHSHTKPYVRAKGRKFERARGKRKSRGYKA	0	7.275	0	11.2299	2	3	2	0.585	2.75	11.2299	2	2	2.65	5.88235	1	1	NA	0	NA	NA	NA	0	NA	NA	NA	0	NA	NA	0	0	0	1	1	2	Sporadic	ITAG only
Solyc01g100030	Deoxyuridine 5_apos-triphosphate nucleotidohydrolase IPR008181 DeoxyUTP pyrophosphatase subfamily 1	AT3G46940	MAENQINSPEITEPSPKVQKLDHPENGNVPFFRVKKLSENAVLPSRASSLAAGYDLSSAAETKVPARGKALVPTDLSIAVPQGTYARIAPRSGLAWKYSIDVGAGVIDADYRGPVGVVLFNHSEVDFEVKAGDRIAQLIVQKIVTPEVEQVDDLDSTVRGSGGFGSTGV	0	6.068	0	10.0592	1	2	1	0.233	2.44	10.0592	1	1	2.62	10.0592	1	1	NA	0	NA	NA	NA	0	NA	NA	NA	0	NA	NA	0	0	0	1	1	2	1 Peptide	ITAG only
Solyc01g100050	WD-40 repeat protein IPR017986 WD40 repeat, region	AT5G27030	MSSLSRELVFLILQFLEEEKFKESVHKLEQESGFFFNMKYFEEKVHAGEWDEVEKYLSGFTKVDDNRYSMKIFFEIRKQKYLEALDKQDKAKAVEILVSDLKVFSTFNEDLYKEITQLLTLTNFRENEQLSKYGDTKTARSIMLIELKKLIEANPLFREKLVFPTLRSSRLRTLINQSLNWQHQLCKNPRPNPDIKTLFTDHTCTPPNGAVAPTPVNLPPAAIAKPAAFTALGAHGPFPPAAAAAANANALAGWMANAAASSSVQAAVVTASSLPVPPNQVSILKRPLTPPATLGMLDYQSADHEQLMKRLRPAQSVEEVTYPTVRQQASWSLDDLPRTVAFTLPQGSSVTSMDFHPSHHTYLLVGSTNGEITLWEVATREKLVAKAFKIWDVQACTLT…	0.002	2.938	5	1.41343	1	1	1	0.048	NA	0	NA	NA	NA	0	NA	NA	NA	0	NA	NA	3.68	1.41343	1	1	NA	0	NA	NA	0	1	0	0	0	1	1 PSM	ITAG only
Solyc01g100320	Thioredoxin_protein disulfide isomerase IPR005788 Disulphide isomerase	AT1G22840	MGRSQICSALAILALFFFSSALADDVVVLTEENFDKEIGQDRAALVEFYAPWCGHCKKLAPEYEKLGASFKKAKSVLIGKIDCDEHKSVCSKYGVQGYPTIQWFPKGSLEPKKYEGARSAEALAEYVNSEAGTNVKIASIPSSVVVLSSDNFDEIVLDETKDVLVEFYAPWCGHCKSLAPIYEKVATAFRQEEDVIIANLDADNHKDLAEKYGVSGYPTLKFFPKGNKAGEDYDGGRDADDFVNFINEKCGTSRDSKGQFTSKAGIVESLDTLVKEFVGATNEEKKAVFSKMEDEAGKLKGSAARYGKIYLKAAKSSMEKGADYANNEIQRLERMLAKSISPTKADEFTLKKNILATFA	0	47.106	0	24.7911	7	31	7	1.61	15.51	14.2061	4	5	14.55	18.9415	5	5	22.05	19.7772	5	7	27.14	19.7772	5	8	22.06	12.2563	3	6	1	1	1	1	1	5	CIP	ITAG only
Solyc01g100350	ADP-ribosylation factor-like protein 3 IPR006687 GTP-binding protein SAR1	AT1G09180	MFLVDWFYGILATLGLWQKEAKILFLGLDNAGKTTLLHMLKDERLVQHQPTQYPTSEELSIGKIKFKAFDLGGHQIARRVWKDYYAKVDAVVYLVDSYDKERFAESKKELDALLSDESLATVPFLILGNKIDIPYAASEDELRYHLGLTGVTTGKGKVNLAESNVRPLEVFMCSIVRKMGYGEGFRWMSQYIK	0	10.139	0	20.2073	3	5	1	1.371	NA	0	NA	NA	2.34	5.69948	1	1	4.67	12.4352	2	2	2.34	5.69948	1	1	2.67	7.77202	1	1	1	0	0	0	0	1	Sporadic	ITAG only
Solyc01g100360	Dihydrolipoyl dehydrogenase (AHRD V1 ***- B5LAW5_CAPAN); contains Interpro domain(s) IPR006258 Dihydrolipoamide dehydrogenase	AT4G16155	MQSSISLSLSSPSTICRSDSSAAVSNVNVNLLNPRSLRFCGLRREAFGLNSSLSTHRIQSLSNATRRPCSNRIVASSAGNGAASKGFDYDLVIIGAGVGGHGAALHAVEKGLKTAIIEGDVVGGTCVNRGCVPSKALLAVSGRMRELQNEHHMKSFGLQVAAAGYDRQGVADHANNLASKIRSNLTNSMKSLGVDILTGFGTVLGPQKVKYGDTVITAKDIIIATGSVPLVPKGIEVDGKTVITSDHALKLEFVPQWIAIVGSGYIGLEFSDVYTALGSEVTFVEALDQLMPGFDPEIGKLAQRVLINPRKIDYHTGVFASKITPAKDGKPVTIELIDAKTKELKDTLEVDAALIATGRAPFTQGLGLENINVQTQRGFVPVDSRMRVIDASGELVPHL…	0	58.269	0	25.0877	12	31	8	2.03	23.7	13.5088	6	7	16.82	11.9298	5	5	18.55	12.2807	5	6	18.37	13.1579	6	7	17.54	12.1053	6	6	1	1	1	1	1	5	WTSP	Detected by both ITAG and Atlas
Solyc01g100380	Calreticulin 2 calcium-binding protein IPR009169 Calreticulin	AT1G09210	MATRRMKSPSSLHLVAVFSLLVVAAAAEVFFQESFNDGWESRWVKSEWKKDENMAGEWNHTSGKWNGDANDKGIQTSEDYRFYAISAEFPEFSNKGKNLVFQFSVKHEQKLDCGGGYMKLLSGDVDQKKFGGDTPYSIMFGPDICGYSTKKVHAILTYNETNHLIKKEVPCETDQLTHVYTFILRPDATYSILIDNVEKQSGSLYSDWDILPPKKIKDPSAKKPEDWDDKEFIDDPEDKKPEGYDDIPEEITDPEAKKPEDWDDEEDGEWTAPTIPNPEYKGPWKAKKIKNPNYKGKWKAPMIDNPDFKDDPDLYVFPKLKYVGVELWQVKSGTLFDNVVICDDPEFAKSIAEETWGKQKDAEKAAFEEAEKKREEEESKNAPAESDADEDDEADEADS…	0	32.456	0	21.5827	10	19	10	2.793	6.41	8.15348	3	3	24.31	16.7866	8	9	6.76	8.15348	3	3	7.6	8.15348	3	3	2.16	2.15827	1	1	1	1	1	1	1	5	CIP	ITAG only
Solyc01g100410	Iron-sulfur cluster insertion protein ErpA (AHRD V1 ***- C8Q1G7_9GAMM); contains Interpro domain(s) IPR016092 FeS cluster insertion	AT1G10500	MLSSSSSTSMIRRVVPFFTARIRQNYRLLNSSASALSQPQSQSQSQVEATDSVVMTENCVRRIKELQAGEHKEKMLRLSVEAGGCSGFQYEFSLDDKTNSDDRIFEHDGVKLVVDNVSFDFVKGATVDYVEELIRSAFQVSTNPSAVGGCSCKSSFMVKQ	0.002	3.906	3	7.5	1	1	1	0.292	NA	0	NA	NA	2.67	7.5	1	1	NA	0	NA	NA	NA	0	NA	NA	NA	0	NA	NA	0	0	0	1	0	1	WTSP	Detected by both ITAG and Atlas
Solyc01g100520	ATP-dependent Clp protease proteolytic subunit (AHRD V1 ***- Q93YH0_SOLLC); contains Interpro domain(s) IPR018215 Peptidase S14, ClpP, active site	AT1G02560	MAHSCIATTSSLSKYNSAIFPSDYCNISPISLQFKRLSLRKVKAVGKVKSRGNSTVKAVYSGGDWDLAKASRSSGIWSIRDDVQIPSSPYFPTYAAQGQGPPPMVQERFQSVISQLFQYRIIRCGGAVDDDMANVIVAQLLYLDAVDPTKDIVMYVNSPGGSVTAGMAVFDTMRHIRPDVSTVCVGLAASMGAFLLSAGTKGKRYSLPNSRIMIHQPLGGAQGGQSDIEIQANEMLHHKANLNGYLAYQTGQSLDRINQDTDRDFFMSAKEAKEYGLIDGVIMNPMKALQPLAAAAEQS	0	65.016	0	28.0936	8	60	8	27.48	52.79	21.4047	5	16	44.21	19.0635	5	15	30.55	19.398	5	10	27.57	25.4181	6	9	30.67	21.4047	6	10	1	1	1	1	1	5	WTSP	Detected by both ITAG and Atlas
Solyc01g100570	Nucleolar protein IPR002687 Pre-mRNA processing ribonucleoprotein, binding region	AT1G56110	MALYLLYESASGYGLFLAHGIDEIGQNTEAVRNSIDDLNRFGKVVKIEAFNPFESALDALNQCNAVSEGQMTEELQNFLERSLPKVKEGKKAKFSLGLAEPKLGSHIHEVTKIPCQSNEFVLEILRGVRLHFEKFVKNLKPGDSEKAQLGLSHSYSRAKVKFNVNRVDNMVTQAIVLLDTLDKDINTFAMRVREWYSWHFPELVKIVNDNYLYAKVAKFVDDKSQLSEDKISALTEIVGDEDKAKEIVEAAKASMGQDLSPVDLINVKLFAQRVMDLVEYRKNLYDYLVAKMHDIAPNLAALIGEVVGARLISHAGSLTNLAKCPSSTLQILGAEKALFRALKTKGNTPKYGLIFHSSFIGRASARNKGRMARYLANKCSIASRLDCFLDKSTTTFGEK…	0	44.272	0	17.179	7	20	7	1.212	2.56	2.16998	1	1	23.24	10.8499	4	7	2.64	4.5208	2	2	23.03	14.2857	6	9	2.05	1.44665	1	1	1	1	1	1	1	5	CIP	ITAG only
Solyc01g100650	NHL repeat containing 2 (AHRD V1 *--- B2RR26_MOUSE); contains Interpro domain(s) IPR011042 Six-bladed beta-propeller, TolB-like	AT1G56500	MALRLTPFLLPTYGKPKLAALFNSRSELSIQFLSKNFRMLDFESRKMGLKVSASQKLEEKNVPESGSQWGKVSAVLFDMDGVLCNSEESSRKAAVDVFAEMGVQVTVEDFVPFMGMGEANFLGGVAAAKGVEGFDTEAAKKRFFEIYLSKYAKPNSGIGFPGAFELVSQCKSSGLKVAVASSADRIKVDANLAAAGLPITMFDAIVSADAFKNLKPAPDIFLAASRILDVPTSECIVIEDALAGVQAAKAAKMRCIAVTTTLSEDTLNAAEPSLIRKEISDISLEDILNGGSGSHNVMVQESQSINDLALSFPEPNMTGSITELDNYVTSGAISSMGGVQVTRRNVVRYGSLGIAASCLLFTITNWKAMQYASPKAIWNLLFGTGNPPFEQKEDASSSQ…	0	56.758	0	13.0919	14	68	14	1.276	39.11	7.70659	9	16	34.97	8.91365	10	15	32.81	6.12813	8	13	37.21	8.54225	9	15	23.88	4.17827	5	9	1	1	1	1	1	5	WTSP	Detected by both ITAG and Atlas
Solyc01g100740	Xaa-pro dipeptidase IPR000994 Peptidase M24, structural domain	AT1G09300	MQALRRNPLHKISSRLLNQVVKTSAYSTKKVYDAGQPTPATHPQLMKEGEITPGITSEEYMQRRKKLLDFLPENSLAIVAAAPTKMMTDVVPYNFRQDADYLYITGCQQPGGVAVLGHDCGLCMFMPEPSLQDVLWQGEVAGVDAALDIFKADLAYPISRLPEMLSRMIESSSIVFHNVKTTTSSYMELEAYRKAVNNCKVKDFSVYTHEARLVKSPAELKLMRDSASIACQALIHTMLYSKLFPDEGMLSAKFEYECRVRGAQRMAFNPVVGGGPNGSVIHYSRNDQKIKDGNLVLMDVGCELHGYVSDLTRTWPPFGNFSPVHEELYDLILETNKKCVEMCRPGTSIREIHRYSEEKLRRGFKEIGILKNDRRYALLNPTNIGHYLGMDVHDSSSIG…	0.006	2.077	13	3.33333	1	1	1	0.129	NA	0	NA	NA	2.36	3.33333	1	1	NA	0	NA	NA	NA	0	NA	NA	NA	0	NA	NA	0	0	0	1	0	1	1 PSM	ITAG only
Solyc01g100870	ADP-ribosylation factor IPR006688 ADP-ribosylation factor	AT1G02440	MGLSFGKLFSRLFAKKEMRILMVGLDAAGKTTILYKLKLGEIVTTIPTIGFNVETVEYKNISFTVWDVGGQDKIRPLWRHYFQNTQGLIFVVDSNDRDRVVEARDELHRMLNEDELRDAVLLVFANKQDLPNAMNAAEITDKLGLHSLRQRHWTCTFRAHVLPLEKGCMRGLTGSQTTLQTRVEHEIHDFCSYIFVNIDFKQCLEHLCTC	0.002	3.214	5	5.2381	1	1	0	0.194	2.03	5.2381	1	1	NA	0	NA	NA	NA	0	NA	NA	NA	0	NA	NA	NA	0	NA	NA	0	0	0	0	1	1	1 PSM	ITAG only
Solyc01g101020	FACT complex subunit SPT16 IPR013953 FACT complex subunit Spt16p_Cdc68p	AT4G10670	MADTRNSNVKASNDKASGTANPYAINLENFGKRLKTLYSHWTEHNDELWGASEALAIGTPPPSEDLRYLKSSALNMWLVGYEFPDTIMVFMKKQIHFLCSQKKASLLEAVKKTSKDVVGVDVVMHVRSKKDDGTGAMDAIFRAMQDQSESNVPVVGHIAREAPEGNLLETWTEKLKNTQFQLSDVTNGFSDLFAVKDTAEIMNVKKAGYLTSSVMKHFVVPKLERVIDEEKKVSHSSLMDDTEKVILEPAKIKVKLKAENVDICYPPIFQSGGEFDLRPSASSNDQNLYYDSTSVIICAIGSRYNSYCSNVARTFLIDANPMQSKAYEVLLKAHEAAIGALRPGNKAGDVYQAALNVVEKEAPELVANLTRSAGTGIGLEFRESGLNLNGKNDRMLKSG…	0.002	3.979	3	1.31209	1	1	1	0.043	NA	0	NA	NA	2.6	1.31209	1	1	NA	0	NA	NA	NA	0	NA	NA	NA	0	NA	NA	0	0	0	1	0	1	1 PSM	ITAG only
Solyc01g101040	ATP-citrate lyase A-3 IPR016102 Succinyl-CoA synthetase-like	AT1G09430	MARKKIREYDSKRLLREHLKRLAGIDLQICSAQVTESTDFTELTNKEPWLSSTKLVVKPDMLFGKRGKSGLVALNLDLAGVAEFVKTRLGVEVEMGGCKAPITTFIVEPFVPHDQEYYLSIVSERLGCTISFSECGGIEIEENWDKVKTIFLPTEKPMTLEACAPLIATLPLEVRGKIGNFLMGVFDVFQDLDFSFIEMNPFTLVNGEPYPLDMRGELDDTAAFKNFKKWGSIEFPLPFGRVLSPTESFIHSLDEKTSASLKFTVLNPKGRIWTMVAGGGASVIYADTVGDLGYASELGNYAEYSGAPNEEEVLQYARVVLDCATANPDGRKRALIVGGGIANFTDVAATFNGIIRALREKEAKLKAARMHIYVRRGGPNYQTGLAKMRALGEELGVPL…	0.002	3.194	5	2.60047	1	1	0	0.194	NA	0	NA	NA	2.09	2.60047	1	1	NA	0	NA	NA	NA	0	NA	NA	NA	0	NA	NA	0	0	0	1	0	1	1 PSM	ITAG only
Solyc01g101060	S-adenosylmethionine synthase IPR002133 S-adenosylmethionine synthetase	AT4G01850	METFLFTSESVNEGHPDKLCDQISDAVLDACLEQDPESKVACETCTKTNLVMVFGEITTKAIVDYEKIVRDTCRNIGFVSDDVGLDADNCKVLVYIEQQSPDIAQGVHGHLTKRPEEIGAGDQGHMFGYATDETPELMPLSHVLATKLGARLTEVRKNGTCAWLRPDGKTQVTVEYSNDNGAMVPIRVHTVLISTQHDETVTNDEIARDLKEHVIKPVIPEKYLDENTIFHLNPSGRFVIGGPHGDAGLTGRKIIIDTYGGWGAHGGGAFSGKDPTKVDRSGAYIVRQAAKSIVASGLARRCIVQVSYAIGVPEPLSVFVDTYGTGKIPDREILKIVKENFDFRPGMMSINLDLKRGGNRRFLKTAAYGHFGRDDPDFTWEVVKPLKWEKPQD	0.002	3.89	3	3.81679	1	1	0	0.166	NA	0	NA	NA	NA	0	NA	NA	NA	0	NA	NA	3.59	3.81679	1	1	NA	0	NA	NA	0	1	0	0	0	1	1 PSM	ITAG only
Solyc01g101240	Aspartic proteinase IPR001461 Peptidase A1	no hits	MDKKHLCAALLLWAIACSALPASSGDLFRIGLKKHRLDVDSIKAARVAKLQDRYGKHVNGIEKKSSDSDIYKVPLKNYLDAQYYGEIGIGSPPQKFKVIFDTGSSNLWVPSSKCYFSIACWIHSKYQASKSSTYTRDGESCSIRYGTGSISGHFSMDNVQVGDLVVKDQVFIEATREPSITFIVAKFDGILGLGFQEISVGNTTPVWYNMVGQGLVKEPVFSFWFNRDANAKEGGELVFGGVDPKHFKGNHTCVPLTQKGYWQFNMGDFLIGNTSTGYCAGGCAAIVDSGTSLLAGPTTIVTQINHAIGAEGIVSMECKTIVSQYGEMIWDLLVSGIRPDQVCSQAGLCFLDGSQHVSSNIRTVVERETEGSSVGEAPLCTACEMAVVWMQNQLKQEQT…	0	12.15	0	12.6482	5	8	5	0.968	NA	0	NA	NA	5.17	5.13834	2	2	4.52	5.5336	2	2	7.95	7.50988	3	3	3.13	2.7668	1	1	1	1	1	1	0	4	CIP	ITAG only
Solyc01g102300	BHLH transcription factor (AHRD V1 *-** B6TXR4_MAIZE); contains Interpro domain(s) IPR011598 Helix-loop-helix DNA-binding	AT3G62090	MAIGKPESGQQKISSTSNLSSFPENDLVELKWQNGQIVMQGQNSSAKKSTVPNNLPSSASGDRDKYTGNSSTSKIGKFGLMDSMLNDMSLTVPTGELDLIQEDEGVPWLGYPADDSLQQDYCAQLLPEISGVTANEQSGQSVFGLINKRGSSDKMIGDSHSVPVHNAVNFERRNTSKVSPSSRFSPLSSLPSQKGHASIPTLESGVSDVFSSKNSNTPLSVLGESNQSKASAGDAKSNRIQKQNMPGNRSNLLNFSHFSRPATLVKAAKLQSSTGGSNISGSPILEAKGKKGEEKVTIGDNHVSAAATENFLTSKKDNFPHYPTNGVSSQLESRPSGASFHDRSCQAEQSDNAFRDCSSNNDNTHDHFTSAKATKDIADGERNVEHGVACSSVCSGSSA…	0.035	1.803	49	1.53846	1	1	1	0.083	1.91	1.53846	1	1	NA	0	NA	NA	NA	0	NA	NA	NA	0	NA	NA	NA	0	NA	NA	0	0	0	0	1	1	1 PSM	Atlas only
Solyc01g102310	Unknown Protein	AT3G05900	MATNTVSSDHPTTVSEQAEKEVLPEEVKTMEGESVPLTKENEDSPSPVVSSTEPVVKVEDTKCESTVIEEPDKNEEEKPKSVEVDDGEKPNAEESSQVITEEVKKDEKPITDDAAPAIVDEVEKSTVETPPSAIIEELKSNDEEEKQKVDEPQVLEIEEVKKAEEEQKPVADEPVPTVVEEVKKADEEEKLTTEEPPVTILEEVKKSDDEEKPKADEPIPTIVEVKTADEQPRIEEPPPTIIAEVKKSDEKEKPEADEPAPTIAEEVKKADEEEKPTIEEPPVTIIEDVKKSVEEEKPIADEPLPPTVEEEKEVDEPPSPLATTHDAEKPKAEELPSIPATSAESEEKTTDKEIEPPTVKEVKKQDETPALNVTTKDIPELTKESAPEPEAQIIPDQVA…	0	8.375	0	6.25832	3	3	3	0.199	NA	0	NA	NA	2.05	1.73103	1	1	NA	0	NA	NA	5.62	4.5273	2	2	NA	0	NA	NA	0	1	0	1	0	2	Sporadic	ITAG only
Solyc01g102410	Glutaminyl-tRNA synthetase (AHRD V1 ***- A8BEZ0_GIALA); contains Interpro domain(s) IPR004526 Glutamyl-tRNA synthetase, class Ic, archaeal/eukaryotic cytosolic	AT5G26710	MELKLSFPADSPPLAVIAAAKIAGVPISTDPTLTTGSTPIMHIDNGLKLRGNFVLLRYISRVANIPDLYQRDACESSQIDEWLEYAPIFASGSQFEEACGYVDGYLLQHTFLVGHSLSIADIAVWSGLAGTGKRWESLRSSKKYQNLARWFNSILTEYGVLNEVTATYVGKKGPGKPTASKVKEQQGSNANLAKVNGDAADKEKEGRKPTSEVDLPEAEVGKVRLRFAPEPSGYLHIGHSKAALLNQYFAERYQGEVIIRFDDTNPDKESNEFVDNLLKDIETLGIKYRTVTYTSDYFPQLMEMAEKLIREGKAYVDDTPREQMQKERMDGIESRCRNNSVEENLKLWKEMIAGSERGTMCCVRGKLDMQDPNKSVRDPVYYRCNQTPHHRIGAKYKVY…	0	7.935	0	2.02703	1	2	1	0.11	NA	0	NA	NA	NA	0	NA	NA	NA	0	NA	NA	8.28	2.02703	1	2	NA	0	NA	NA	0	1	0	0	0	1	1 Peptide	Detected by both ITAG and Atlas
Solyc01g102660	Maleylacetoacetate isomerase _ glutathione S-transferase IPR005955 Maleylacetoacetate isomerase	AT2G02390	MAGSGEESKKLQLYSYWRSSCAFRVRIALNLKGLDYEYKAVNLLKGEQRDPEYLKLNPLGYVPTLVDGDAVIADSFAILMYLEEKYPQRALLPQDCQKRAINYQAANIVSANIQPLQNLAVLKYIQEKIGPDETTPWVQGHITKGFEALEKLLKDYAGKYATGDEVYMADLFLAPQIHAAIKRFEVDMNQFPTLLRVFEAYQELPAFQDAMPEKQPDAIHHL	0.002	2.975	5	6.30631	1	1	1	0.212	NA	0	NA	NA	NA	0	NA	NA	NA	0	NA	NA	2.66	6.30631	1	1	NA	0	NA	NA	0	1	0	0	0	1	1 PSM	ITAG only
Solyc01g102760	PHD finger family protein	AT5G20510	MENTVPRTVEEVFNDFKGRRAGLIKALTTDVEKFYQSCDPEKENLCLYGLPNETWEVNLPVEEVPPELPEPALGINFARDGMQEKDWLSLVAVHSDSWLLSVAFYFGARFGFGKSERKRLFQMTNDLPTVFEVVTGAAKQARDAAHNNSSKSKSSGKPRQPEPQPKEVKVSPPTMEDESGEEEEEEEEEQGATLCGACGDNYATDEFWICCDICERWFHGKCVKITPAKAEHIKQYKCPSCSSKRARV	0.002	3.537	4	4.03226	1	1	1	0.292	NA	0	NA	NA	NA	0	NA	NA	NA	0	NA	NA	2.7	4.03226	1	1	NA	0	NA	NA	0	1	0	0	0	1	1 PSM	ITAG only
Solyc01g102820	2-C-methyl-D-erythritol 4-phosphate cytidylyltransferase (AHRD V1 ***- A9ZN09_HEVBR); contains Interpro domain(s) IPR001228 4-diphosphocytidyl-2C-methyl-D-erythritol synthase	AT2G02500	MSTLQLGIILSSSSPMFLASNSHIPKNVLPSISLFPTYFVKNPCRRTYSHADPRRGLFKISCSSTSENLNKESDVVVVEEKSVSVILLAGGKGKRMGASMPKQYLPLLGQPIALYSFYTFSKMPQVKEIIVVCDPSYQDIFEDAKEYIQVDLKFALPGKERQDSVYSGLQEVDSNSKLACIHDSARPLVQIEDVEKVLKDGWLVGAAVLGVPAKATIKEANSESFVVKTLDRKTLWEMQTPQIIKPELLKKGFELVNREGLEVTDDVSIVEHLKHPVYITEGSYTNIKVTTPDDLLLAERILNIEES	0	64.886	0	41.6938	12	77	12	7.66	66.5	41.6938	12	23	53.7	32.899	9	18	46	26.3844	7	14	35.55	25.7329	7	11	38.27	23.7785	6	11	1	1	1	1	1	5	WTSP	Detected by both ITAG and Atlas
Solyc01g102950	FAD dependent oxidoreductase (AHRD V1 **-- B5VX05_SPIMA)	AT2G32640	MALQLQLQTTVRNGVFQYPSAIRPFGNRKRVSFQAQATPTRTQRIMEGIAVSGEVGGAGGAYSYTALKRLDQLLSKICSASAVVEEPQKVVFSVPGSYKDSEHVGNSEEMFDVIVCGGTLGIFIATALSSKGLRVGVVERNVLKGREQEWNISRKELLELVEVGVLTEDDIEEATAASFNPNRCGFEGKGDIWVQGILNLGVSPVKLVEIVKDRFDSLGGVTFEGYSVSNISVYQDAAVLQLKEGKTLFSRLIIDAMGNFSPIVKQIRCGRKPDGMCLVVGTCCRGFKENSTSDVIFSSATAKEVGQSLVQYFWEAFPAGSGPIDRTTYMFTYVDPQPGSPQLEELLEDYWDLMPKYQGVSFDDLEILRIIFGIFPTYRDSPLPAAFDRILQFGDASGI…	0.002	3.689	3	3.28407	2	4	2	0.245	NA	0	NA	NA	NA	0	NA	NA	NA	0	NA	NA	4.41	3.28407	2	2	4.33	3.28407	2	2	1	1	0	0	0	2	WTSP	Detected by both ITAG and Atlas
Solyc01g103100	Short-chain dehydrogenase/reductase SDR (AHRD V1 ***- A6C8Y5_9PLAN); contains Interpro domain(s) IPR002347 Glucose/ribitol dehydrogenase	AT1G10310	MAIAGTTPSSPFLGHVPFHIGKSSFAQFTHHSLFRGSKTTVKVLLPLGKFTSIWFPQSQRFRQRSRIHATGNPSMRSAGGAIRTLLITGVSRGLGKALALELAKRGHYIIGCARSQDKLNAFQTELASSTNPPSENKHLLMSVDVSLNSSVEEFARAVMEKKGVPDIIVNCAGTINRNNKLWEVPAEEFDSVIDTNLKGTANVLRYFIPLMLEKKQGVIVNMSSGWGRSGAAQVAPYCASKWAIEGLTASVAKELPPGMAAVALNPGVIYTDMLQSCFGNSASLYQTPESWAPKAANMILNLTMADNGASLSV	0	21.233	0	15.016	6	27	6	1.512	16.52	9.90415	4	6	10.03	9.90415	4	4	7.61	10.5431	4	5	13.65	9.90415	4	6	14.74	12.1406	5	6	1	1	1	1	1	5	WTSP	Detected by both ITAG and Atlas
Solyc01g103110	Unknown Protein (AHRD V1); contains Interpro domain(s) IPR007434 Protein of unknown function DUF482	AT2G23390	MAITGALPSSPFLGHVPFYLGKSSSTHFTHNSVCIFKVKALFWGSRRSVKPADKVLSLGEFTLSEADSLGNTGTPEKISVSVVSSIAEVSPDNWDSCSLDATGHQQFNPFLSHGFLSSLEESGSAVEGTGWIPQHIIAEDASKNILGVVPLYLKSHSYGEYVFDNSWANAYYNYGLSYYPKLQCSVPFTPVTGPRILVRNTSHRDQVFDILVSALKDLAAKFKVSSLHITFPTSNEWNKLEEKGFLQRTGMQYHWKNRNYKNFDEFLMDMKQSKRKNIRQERKKISAQNVTMKRLRGHEIKASHWDTFYKFYRNTTDNKWGTAYLTRDFFHRMGAKMGDNVLLVVAEEGDELVAAALNFIGGDTLYGRLWGCLPGTYYANLHFEACYYQAIDAAIELNL…	0	9.57	0	6.22318	3	9	3	0.54	1.91	3.86266	2	2	2.23	2.36052	1	1	4.43	3.86266	2	2	5.67	4.50644	2	2	4.7	3.86266	2	2	1	1	1	1	1	5	WTSP	Detected by both ITAG and Atlas
Solyc01g103220	Cytochrome c IPR002327 Cytochrome c, class IA_ IB	AT1G22840	MASFAEAPPGNPKAGEKIFKTKCAQCHTVDKGAGHKQGPNLNGLFGRQSGTTAGYSYSNANKNMAVNWGENTLYDYLLNPKKYIPGTKMVFPGLKKPQERADLIAYLKEATA	0.025	1.672	61	7.14286	1	1	0	0.389	NA	0	NA	NA	NA	0	NA	NA	NA	0	NA	NA	1.95	7.14286	1	1	NA	0	NA	NA	0	1	0	0	0	1	1 PSM	ITAG only
Solyc01g103380	Ras-related protein Rab-25 IPR015595 Rab11-related	AT1G07410	MARRAEEEYDYLFKVVLIGDSGVGKSNLLSRFTRNEFLLESKSTIGVEFATRTLQVEGRTVKAQIWDTAGQERYRAITSAYYRGALGALLVYDVTKPTTFENVSRWLKELRDHADSNIVIMLIGNKTDLKHLRAVATEDAQSFAEKEGLSFIETSALEATNVEKSFQTILSEIYRIISKKPLSSEEPANANIKEGKTLVVGAEEPAPKKACCSA	0	6.692	0	11.215	2	3	2	0.389	NA	0	NA	NA	NA	0	NA	NA	2.69	6.07477	1	1	2.31	5.14019	1	1	2.04	6.07477	1	1	1	1	1	0	0	3	CIP	ITAG only
Solyc01g103440	Phosphoribosylamine--glycine ligase (AHRD V1 ***- D7KJV0_ARALY); contains Interpro domain(s) IPR000115 Phosphoribosylglycinamide synthetase	AT1G09830	MACMSLNIGAASALKFVSNSQNHPVKLFSAKEQRCSNFSSSNWGCFSLRVRRSSCLRFDTQKSFAVFNSLPVDNSNPKESVVVLVIGGGGREHALCHALRRSPSCDAIFCAPGNAGISSSGDATCISDLDVLDSSAVIAFCRKWGVGLVVVGPEAPLVAGLANDLVKEGIPTFGPSSEAAALEGSKNFMKSLCDKYGIPTAKYQAFTDPSAAKEYIKQEGAPIVVKADGLAAGKGVIVAMTLEQAYEAVDSMLVDNVFGSAGSRVIVEEYLEGEEASFFALVDGEHAIPLESAQDHKRVGDGDTGPNTGGMGAYSPAPVLTKELQSMVMESIIFPTVKGMAEEGCKFVGVLYAGLMIEKKSGLPKLIEYNVRFGDPECQVLMVRLESDLVEILLAACHG…	0	44.44	0	16.7315	7	31	7	1.565	27.02	8.75486	4	7	12.81	7.58755	3	4	24.55	14.2023	6	8	18.71	7.58755	3	6	16.84	15.5642	6	6	1	1	1	1	1	5	WTSP	Detected by both ITAG and Atlas
Solyc01g103450	Chaperone DnaK (AHRD V1 ***- Q1SKX2_MEDTR); contains Interpro domain(s) IPR012725 Chaperone DnaK	AT5G49910	MASSTAQIHALGATYFANSSSSTRKPLKSVFLGQKLNNRTLAFGLKQKKSRGNNGGYAPMRVVAEKVVGIDLGTTNSAVAAMEGGKPTIVTNAEGQRTTPSVVAYTKSGDRLVGQIAKRQAVVNPENTFFSVKRFIGRKMNEVDEESKQVSYNVIRDENGNVKLDCPAIGKSFAAEEISAQVLRKLVDDASKFLNDKVSKAVVTVPAYFNDSQRTATKDAGRIAGLEVLRIINEPTAASLAYGFEKKSNETILVFDLGGGTFDVSVLEVGDGVFEVLSTSGDTHLGGDDFDKRIVDWLAASFKRDEGIDLLKDKQALQRLTETAEKAKMELSSLTQTNISLPFITATADGPKHIETTITRGKFEELCSDLLDRLKTPVQNSLRDAKLSFSDIDEVILVG…	0	251.83	0	45.2347	41	493	31	58.078	332.95	43.9545	37	130	307.33	41.5363	33	115	285.52	37.9801	28	97	235.69	37.2688	26	84	201.11	34.2817	21	67	1	1	1	1	1	5	WTSP	Detected by both ITAG and Atlas
Solyc01g103480	Coatomer subunit delta IPR008968 Clathrin adaptor, mu subunit, C-terminal	AT5G05010	MVVLAASIISKSGKALVSRQFVDMSRIRIEGYLAAFPKLVGIGKQHTYIETENVRYVYQPIESLYLLLVTNKQSNILEDLETLRLLSKLVPEYSYSLDEEGIGRTAFELIFAFDEVISLGHKENVTVTQVKQYCEMESHEERLHKLVLQNKINETKDVMKRKASEIDKSKIERNRGDKGGFMSLQSMSSGRIDTGFGSDSGISNIGGNGSGGFALPPDVDTFSTKSKGRPAASATAPPKGLGMQLGKTQKTNQFLESLKAEGEVIVEDVRPSVGQAKPAAAPLTDPVTLTVEEKINVTLKRDGGLSNFVVQGTLSLQILNQEDAFIQVQIETSGNPAILFKAHPNMNKELFANENILGLKDPNRSFPTGQGGDGVSLLRWRMQSTDESILPLTINCWPS…	0	4.851	0	2.27704	1	3	1	0.202	1.81	2.27704	1	1	2.74	2.27704	1	2	NA	0	NA	NA	NA	0	NA	NA	NA	0	NA	NA	0	0	0	1	1	2	1 Peptide	ITAG only
Solyc01g103510	Ribosomal protein L3-like (AHRD V1 ***- Q2VCJ2_SOLTU); contains Interpro domain(s) IPR000597 Ribosomal protein L3	AT1G61580	MELQADGLCQVKPLRSSSYSSETWNSKPINSSQKATICIRRRFRQFSELLQVGKMSHRKFEHPRHGSLGFLPRKRAARHRGKVKAFPKDDPTKPCRLTAFLGYKAGMTHIVREVEKPGSKLHKKETCEAVTIIETPPMIVVGVVGYVKTPRGLRCLSTVWAQHLSEEIKRRFYKNWCMSKKKAFAKYSKKYETDEGKKDINAQLEKMKKYCSVIRVLAHTQIRKMKGLKQKKAHLMEIQVNGGDAAQKVDYAYGFFEKQIPVDAIFQKDEMIDIIGVTKGKGYEGVVTRWGVTRLPRKTHRGLRKVACIGAWHPARVSFTVARAGQNGYHHRTEMNKKVYRLGKAGQESHSAITEFDRTEKEITPIGGFPHYGVVKEDFLLIKGCCVGPKKRVVTLRQS…	0.008	2.58	10	1.80587	1	1	1	0.08	1.94	1.80587	1	1	NA	0	NA	NA	NA	0	NA	NA	NA	0	NA	NA	NA	0	NA	NA	0	0	0	0	1	1	1 PSM	Detected by both ITAG and Atlas
Solyc01g103710	Fe/S biogenesis protein nfuA (AHRD V1 *--- NFUA_BUCCC); contains Interpro domain(s) IPR001075 NIF system FeS cluster assembly, NifU, C-terminal	AT4G25910	MQSAMLLNPPTPSSSYVSRSFQTLDSPSSSSSCSPSSSTATLFLPPLPLEISGFFGTRVSSWTRPNSSPRSLRRASQFRVVKAVATPNSAVEPNSSLELPLTSENIESVLDEIRPYLISDGGNVALHEIDGNVVKLKLQGACGSCPSSVTTMKLGIERRLMEKIPEIVAVEAVPDEETGLELNEENIEKVLEEIRPYLVGAAGGSLELVAIEEPIVKVRITGPAAGVMTVRVAVTQKLREKIPSIAAVQLLQ	0.061	1.459	88	4.36508	1	3	1	0.585	2.62	4.36508	1	1	2.74	4.36508	1	1	2.52	4.36508	1	1	NA	0	NA	NA	NA	0	NA	NA	0	0	1	1	1	3	WTSP	Atlas only
Solyc01g103750	ATP phosphoribosyltransferase (AHRD V1 **** O46887_THLGO); contains Interpro domain(s) IPR001348 Histidine biosynthesis HisG: ATP phosphoribosyltransferase	AT1G09795	MTAIQTFFLQGSVSTLLSSQSSVTSCRKVSVKFTVSCCSATSPLAVVNGNVEKRPSDRTEVRIGLPSKGRMAADSLDLLKDCQLSVRQVNPRQYVAEIPQIPNLEVWFQRPKDIVRKLVAGDLDLGIVGLDTVCEYGQGDEDLIIVHDALEYGDCRLSLAIPKYGIFENVNSMKELAEMSQWTPERPLRVATGFTYMGPKFMKENGLKHVTFSTADGALEAAPAMGIADAIVDLVSSGTTLRENNLKEIEGGVIVQSQAVLVAGRKSLMQRKGALDITHEMLERLEAHLRAVGQFTVTANMRGSSAEEVAERILSQTSLSGLQGPTISPVFCKHDGRVTANYFAIVICVPKKALYKSVQQLRAIGGSGVLISPLTYIFDEETPRWRQLLSTLGL	0	57.176	0	21.5736	9	48	9	7.577	40.46	20.0508	8	13	24.42	14.467	6	8	25.85	18.7817	7	10	28.7	18.7817	7	11	17.05	11.6751	4	6	1	1	1	1	1	5	WTSP	Detected by both ITAG and Atlas
Solyc01g103950	Thiamine-phosphate pyrophosphorylase/thiamine-phosphate pyrophosphorylase (AHRD V1 **-- A9NB66_COXBR); contains Interpro domain(s) IPR004399 Phosphomethylpyrimidine kinase type-2	AT1G22940	MAHLCSQVLSTSFFTPKPQIPVLLSPGVACIKSFHQYRFLHVKAMQDGKFATPTSCDESKVRVPHVLTVAGSDSGAGAGIQADIKACAARGVYCSTVITAVTAQNTVGVQGVNIVPEDFVAEQLRSVLSDMPPNVVKTGMLPSTGIVKTLCQSLKEFPVQALVVDPVMVSTSGHTLAGPSILDSFREELLPMADIVTPNLKEASALLGGVPLETIADMRSAAKAIHDIGPRNVLVKGGDLPASLDAVDVFYDGNDFYEFRSSRIMTPNTHGTGCTLASSVAAELAKGSQMLSAVKVAKRYVEAVLSYSKNIAIGGGCQGPMDHLLKLKSNVQRRRFDPSDLFLYAVTDSRMNKKWGRSIVDAVKAAIEGGASIIQLREKEVETGDFLEAAKACLKICRV…	0	25.445	0	10.1266	4	16	4	0.778	14.58	10.1266	4	5	2.89	3.25497	1	1	14.65	8.67993	3	4	9.26	5.42495	2	3	11.49	5.78662	2	3	1	1	1	1	1	5	WTSP	Detected by both ITAG and Atlas
Solyc01g104040	UDP-glucose glycoprotein glucosyltransferase (AHRD V1 **** D7KYS8_ARALY); contains Interpro domain(s) IPR009448 UDP-glucose:Glycoprotein Glucosyltransferase	AT1G71220	MGTRFRFGFWVVIAVAFSICLSGYSVSAANSKPKNVQVALRAKWSGTPILLEAGELLSKESKDHFWDFIELWLHSADENSDCRSAKDCLKRIIKYGRSLLSESLIAMFEFSLTLRSASPRIVLYRQLAEESLSSFPLTDDNSSSSPDEGVLQQSDNAKNKKVNPLLVGENPRSPEGNCCWVDTGERLFFDVAELLVWLQNAKEVSLDTLHPEIFEFDHVHPDSNVGNPVAILYGALGTHCFEQFHHTLTSAAREGKIYYVVRPVLPSGCESKSTPCGALGTRDSLNLGGYGVELALKNMEYKAMDDSIVKKGVTLEDPHTEDLSQEVRGFIFSRILERKQELTSEIMAFRDYLLSSTVSDTLDVWELKDLGHQTAQRIVHAADPLQSMQEINQNFPSVV…	0	20.216	0	4.7503	5	7	5	0.182	2.41	0.974421	1	1	12.69	3.77588	4	4	2.04	0.974421	1	1	2.75	0.974421	1	1	NA	0	NA	NA	0	1	1	1	1	4	CIP	Detected by both ITAG and Atlas
Solyc01g104170	Ankyrin repeat domain-containing protein 2 IPR002110 Ankyrin	AT2G17390	MSEGEKALPTASKDEKSGAAESKKSPESSTVEAPSGEGRTASAAAGAGVQNPFDFSAMSGLLNDPSIKELAEQIAKDPAFNQMAEQLQKTFQGAAVEESVPNFDSQQYYSTMQQVMQNPQFMTMAERLGNALMQDPSMSGMLESLSNPAQKEQLEERMARIKEDPSLKPILEEIESGGPAAMMRYWNDQDVLKKIGEAMGFAAGGEGATSSEIPGPDETEEANEDESVVHQCASVGDAEGLKAALAAGADKDEEDSEGRTALHFACGYGEEKCAQLLVEAGAKVDALDKNKNTALHYAAGYGRKECVALLLENGAAVTLQNLDGKTPIDVAKLNNQQDVLKLLEKDAFL	0	26.144	0	9.45559	3	9	3	0.778	15.42	9.45559	3	4	2.08	4.58453	1	1	4.91	4.58453	1	1	9.51	9.45559	2	2	5.38	4.58453	1	1	1	1	1	1	1	5	CIP	ITAG only
Solyc01g104370	60S acidic ribosomal protein P1 IPR001813 Ribosomal protein 60S	AT4G00810	MSLGEIASTYACLILHDDDIAITAEKISAIVKAANVTVEPYWPLLFAKLAEKKNISDLIMNVGAGGGGVAAVAAPVGGAAAGGGAAAAPAAEEKKEEPKEESDDDMGFSLFD	0.011	1.938	25	14.2857	1	1	1	1.154	NA	0	NA	NA	3.14	14.2857	1	1	NA	0	NA	NA	NA	0	NA	NA	NA	0	NA	NA	0	0	0	1	0	1	1 PSM	ITAG only
Solyc01g104840	RNA-binding protein RZ-1 IPR012677 Nucleotide-binding, alpha-beta plait	AT3G26420	MSEEDEYRCFIGNLSWSTSDRGLKDAFEKFGHLVDAKVVLDKFSGRSRGFGFVTFDEKRAMEDAIEAMNGMDLDGRAITVDKAQPQQGSGRDFDSDRPRDRDRDRGRDRDRDRGSRDYGGGRGAGGGGGDCYNCGKPGHFVDLTGTEIDMEAAAAEMVVVVKEGNVLTVIVLDHMIVAVLEAIEADTLNCAEELKSPSWMQMFWCMSTWCLVSLACQRNHLSS	0.021	1.733	49	7.62332	1	2	1	0.292	NA	0	NA	NA	NA	0	NA	NA	3.25	7.62332	1	1	NA	0	NA	NA	3.26	7.62332	1	1	1	0	1	0	0	2	1 Peptide	ITAG only
Solyc01g104950	Alpha-L-arabinofuranosidase/beta-D-xylosidase (AHRD V1 **** D9D7L0_MALDO); contains Interpro domain(s) IPR001764 Glycoside hydrolase, family 3, N-terminal	AT1G02640	MKKNRAMDEIKKHQHSVLLCFFFILSHFFLQFKPVSAQTSAVFACDTANNPSLKSFPFCDVSLGVSDRVNDLVKRLTLQEKISMLVNTAGSVSRLGIPKYEWWSEALHGISYTGPGVKFNNIVPHATSFPQPILTSASFNETLFQTIGKVVSTEGRAMYNVGQAGLTYWSPNVNIYRDPRWGRGQETAGEDPTLSSRYGVAYVKGLQQRDDGKKDMLKVASCCKHYTAYDVDDWKGIQRYNFNAKVTQQDLDDTFNPPFKSCVLDGNVASVMCSYNQVNGKPTCGDYDLLAGVIRGQWKLNGYIVTDCDSLNEMYWAQHYTKTPEETAALSLNAGLDLNCGSWLGKYTQGAVNQGLVNESVIDRAVTNNFATLMRLGFFDGNPKNQLYGNLGPKDICTE…	0	39.773	0	12.4679	8	17	6	0.874	6.79	3.3419	2	2	25.06	12.4679	8	9	2.02	0.899743	1	1	5.79	2.31362	2	2	7.91	3.98458	3	3	1	1	1	1	1	5	CIP	Detected by both ITAG and Atlas
Solyc01g105020	Phosphatase PTC7 homolog (AHRD V1 *-*- C1BT38_9MAXI); contains Interpro domain(s) IPR001932 Protein phosphatase 2C-related	AT4G33500	MADSLCKFLDGRCITGSQFFATYFSAQKPFLFPTLVRRKRRRKSLHIAFCSTPISTNLDVVSTHEHSDGTLLFRFGDPREIAKEDELEEPLLDSEEEFSVVKVLDGDNEREVIVKKVEREARGEAVTVVTDAGVSESVVIGNGRNDLVEVETGLSKNFLGDSAVEIGSFSPEGIQNESVAEVDIENAVHVEEIFEKKDDSEASVPPPPENSITSLEVEEEMMGQTSDESFEELDDDKSLVLSSPTAMPVYSDLVNTKEIEEFEGEGSSQLTENDGDKDCCYDSTHSKENGAASADIEAAHNDIEIVQQIEQISENIGSILEGSTESVPEGINLGNAKTVADEISPENAPEGINLGNTETVGDEISPDNAPEGINLGNTEAVVDEISSDNAPEGIDKGNT…	0	55.331	0	7.99239	7	18	7	2.162	20.86	6.47003	5	5	24.32	7.51665	5	6	3.16	1.23692	1	1	6.29	1.23692	1	2	14.35	4.18649	3	4	1	1	1	1	1	5	WTSP	Detected by both ITAG and Atlas
Solyc01g105060	(3R)-hydroxymyristoyl- (AHRD V1 ***- Q9LX13_ARATH); contains Interpro domain(s) IPR010084 Beta-hydroxyacyl-(acyl-carrier-protein) dehydratase FabZ	AT5G10160	MASMALSQSVFSTPTSQRFENASFPLPSSMVKQSLVTFRSHSLSTHCKKIRNSVITNCAAPDNDSKIETPIELRYPAFPTVMDINQIREVLPHRFPFLLVDRVIEYNPGVSAVAIKNVTINDNFFPGHFPERPIMPGVLMVEAMAQVGGLVMLQPEVGGSKQNFFFAGIDKVRFRKPVIAGDTLVMRMTLIKLQKRFGIAKMEGKAYVGGDVVCEGEFLMATGSE	0	65.369	0	34.6667	9	78	9	16.783	57.73	31.1111	8	18	55.95	27.5556	7	18	45.99	33.7778	8	17	46.76	31.1111	8	17	23.23	17.7778	5	8	1	1	1	1	1	5	WTSP	Detected by both ITAG and Atlas
Solyc01g105170	Copper-exporting P-type ATPase A (AHRD V1 *-*- COPA_STAHJ); contains Interpro domain(s) IPR001757 ATPase, P-type, K/Mg/Cd/Cu/Zn/Na/Ca/Na/H-transporter	AT5G21930	MESSLLTSPAAISRLAASRTVNCNCSPLISQFHRHFSTRSTQFVLMSQLARFHLRAVCNGEVRGLNRFGSVSLSGSLAAANLRPVQKDLRSVSRSAASFAASGGGNDNPRGNGGGGGGNGDGATDGGKENPSVVAETGEDISALSSDVIILDVTGMTCGGCASSVKRILESQPQVSSATVNLTTETAIVWPVSDAKVVPNWQKQLGEALAKHLSTCGFKSNVRGEGAIEGEFPS	0	6.512	0	6.83761	1	7	1	0.259	3.67	6.83761	1	1	NA	0	NA	NA	7.28	6.83761	1	2	6.21	6.83761	1	2	5.22	6.83761	1	2	1	1	1	0	1	4	WTSP	Detected by both ITAG and Atlas
Solyc01g105340	Chaperone protein dnaJ IPR012724 Chaperone DnaJ	AT2G22360	MLANQKSKAVTYRKLARSYHPDVNKEPGAEQKFKEISNAYEVLSDDEKRSIYDKYGEAGLKGAGAGMGDFSNAFDLFESLFDGFGGMGGMGGMGGRGSRSRATEGEDQGYNLVLNFKEAVFGVEKEIEISRLETCGTCDGSGAKPGTKPSTCNTCGGQGQVVSSARTPLGVFQQVTTCSSCGGTGEISTPCGTCNGDGRVRKSKRISLKVPPGVDSGSRLRVRSEGNAGRRGGPPGDLFVMIEVLPDPVLKRDDTNILYNCKVSYIDAILGTTMKVPTVDGMVDLKIPAGTQPGTTLVMAKKGVPFLSKPNMRGDQLVRVQVEIPKRLSSEERKLIEELANLNKPKAATNSKR	0	56.776	0	27.4788	8	36	8	2.981	34.18	17.5637	5	9	39.37	18.9802	5	10	24.53	12.1813	3	7	13.97	10.4816	3	4	17.79	14.1643	4	6	1	1	1	1	1	5	WTSP	ITAG only
Solyc01g105390	Phospho-2-dehydro-3-deoxyheptonate aldolase 2 (AHRD V1 ***- B6UAK5_MAIZE); contains Interpro domain(s) IPR002480 DAHP synthetase, class II	AT4G33510	MKGKLEIINSKWFLNRVSHKMDPNELVKLIDILNPQNRPGRITVIARMGADNMRVKLPHLIRAIRGAGQIVTWVSDPMHGNTTKAPCGLKTRSFDSIRAEVRAFFDVHDQEGSYPGGVHLEMTGQNVTECVGGSQTITYNDLSSRYHTHCDPRLNASQALNLPLLLRSASGKEDWVLSLGFRKPILLPFH	0	10.375	0	21.0526	3	14	2	0.701	10.24	21.0526	3	5	6.75	11.0526	2	3	2.62	11.0526	2	2	7.51	21.0526	3	3	4.44	10	1	1	1	1	1	1	1	5	WTSP	Atlas only
Solyc01g105420	Phospho-2-dehydro-3-deoxyheptonate aldolase 2 IPR002480 DAHP synthetase, class II	AT4G33510	MDPNELVKLIDILNPQNRPGRITVIARMGADNMRVKLPHLIRAIRGAGQIVTWVSDPMHGNTTKAPCGLKTRSFDSIRAEVRAFFDVHDQEGSYPGGVHLEMTGQNVTECVGGSRTITYNDLSSRYHTHCDPRLNASQALELAFIIAERLRKRRLGPKFGF	0	27.859	0	40.9938	5	49	2	2.511	30.44	40.9938	5	10	23.68	22.9814	3	7	31.37	22.9814	3	10	40.36	40.9938	5	13	31.7	27.9503	3	9	1	1	1	1	1	5	WTSP	ITAG only
Solyc01g105560	3 4-dihydroxy-2-butanone 4-phosphate synthase (AHRD V1 ***- D7CLR6_SYNLT); contains Interpro domain(s) IPR000422 DHBP synthase RibB	AT5G64300	MASINISFPSTTFHSRSQANFKLFSGLHSGDVVSLNGVSSGSFIRLNARPHLTIKSDFKITSALLSGEGDIRFQSRGEKTLFSSLSTGTETQPDAVTFATLEADGVPTTSGFLSDDDECDLDRPTEGFSSVPEAIEDIRQGKMVLVTDDEDRENEGDLVMAASKATPEAMAFFVKYGTGIVCVSMTEEHLERLQLPLMVNDKKNEEKLCTAFTVSVDAKHGTTTGVSAHDRATTVLALASGDSKPEDFNRPGHIFPLKYREGGVLKRAGHTEASVDLAVLAGLDPVGVICEVVDDDGSMARLPMLRQFAKEHNLKIISVADLIRYRRKTDQLVEHASAARIPTMWGPFTAHCFKSIIDGIEHIAMVKGDIGDGQDILVRVHSECLTGDIFGSARCDCGS…	0	63.281	0	22.4638	13	44	13	2.728	34.66	20.2899	12	13	32.56	16.6667	9	11	29.36	11.0507	6	9	11.79	9.96377	5	5	18.11	11.413	5	6	1	1	1	1	1	5	WTSP	Detected by both ITAG and Atlas
Solyc01g105810	Rab-GDP dissociation inhibitor IPR000806 Rab GDI protein	AT3G59920	MDEEYDVIVLGTGLKECILSGLLSVDGLKVLHMDKNDYYGGESSSLNLIQLWKRFRGNDQPPEELGTSKEYNVDMIPKFAMANGTLVRVLIHTDVTKYLNFKAVDGSFVYNKGKIYKVPATDVEALKSPLMGLFEKRRARKFFLYVQDFEETDPKTHEGMDLNKITAKEFIAKYELEDDTIDFIGHALALCTDDNYLAQPAMDFIKRVKLYAESLARFQAGSPYIYPLYGLGELPQAFARLSAVYGGTYMLNKPQCKVEFDDGGKVVGVTSEGETAKCKKVVCDPSYLPDKVQKVGKVARAICIMSHPIPNTNDSHSAQVILPQKQLGRKSDMYLFCCSYSHNVAPKGKYIAFVSTEAETDDPESELKPGVDILGAVDEIFYETYDRFIPSHDSAADNC…	0.001	4.176	2	3.37079	1	1	0	0.122	NA	0	NA	NA	3.02	3.37079	1	1	NA	0	NA	NA	NA	0	NA	NA	NA	0	NA	NA	0	0	0	1	0	1	1 PSM	ITAG only
Solyc01g105890	(E)-beta-ocimene synthase (AHRD V1 **** Q5CD81_CITUN); contains Interpro domain(s) IPR005630 Terpene synthase, metal-binding domain	AT3G25810	MVSILSNIGMMVVTFKRPSLFTSLRRRSANNIIITKHSHPISTTRRSGNYKPTMWDFQFIQSLHNPYEGDKYMKRLNKLKKEVKKMMMTVEGSHDEELEKLELIDNLERLGVSYHFKDEIMQIMRSINININIAPPDSLYTTALKFRLLRQHGFHISQDILNDFKDENGNLKQSICKDTKDILNSSKDEHDNLKQSTCNNTKGLLKLYEASFLSIENESFLRNTTKSTLAHLMRYVDQNRCGEEDNMIVELVVHALELPRHWMVPRLETRWYISIYERMSNANPLLLELAKLDFNIVQATHQQDLRILSRWWKNTGLAEKLPFSRDILVENMFWAVGALFEPQHSYFRRLITKVIVFISIIDDIYDVYGTLDELELFTLAIQRWDTKAMEQLPDYMKVC…	0.008	2.548	10	1.31363	1	1	1	0.075	NA	0	NA	NA	2.04	1.31363	1	1	NA	0	NA	NA	NA	0	NA	NA	NA	0	NA	NA	0	0	0	1	0	1	WTSP	Detected by both ITAG and Atlas
Solyc01g105990	Os01g0107900 protein (Fragment) (AHRD V1 *-*- Q0JRC9_ORYSJ)	AT4G33630	MASITPPPTFDVNTHKFNFSNPKFTSRLKRSSSSFTLSTSHLLSRVSGSAFCCRCRNGTGDGETVEPSPSVSSQNSSSSSSSWRWDLAFQDAVKNAMKKLDDYVNWSKGVGLDERKSEIGVDDQEWDWERWKKHFSEVEEEERLVSVLKAQLAHAISREDYEDAARLKVAIAAAATKDIVGRVMSHVNKALEEERYRDAAFMRDCAGTGLVGWWAGTSQDVSDPYGRIIRISAEHGRYVARSYSPRQLASTVEGAPLFEIFLTVDNKGEYRQQAVYLKRKPVQQDLPISSSKLPGASSNLDTVGPTENKSDMFDKISDAEEDGEDREDDFGFQNALKDMIPGVQVKVLKVTAPGKVDRDLISKVIEQIMDEEDEDEEKDYDLDSVDDEDEIKVERDGEQ…	0	8.131	0	4.47977	2	2	2	0.122	2	2.45665	1	1	NA	0	NA	NA	NA	0	NA	NA	NA	0	NA	NA	2.55	2.02312	1	1	1	0	0	0	1	2	WTSP	Detected by both ITAG and Atlas
Solyc01g106010	Fructose-1 6-bisphosphatase class 1 (AHRD V1 ***- D3PE46_DEFDS); contains Interpro domain(s) IPR000146 Fructose-1,6-bisphosphatase	AT5G64380	MASSPFSGGLINSRVDSPIAIGCKNASVDSANSGFSTLMEYMGKGGVDVGDDLVLLFGHLEYASKKIAALVACPFNSSLNNNVAIGNTGTSSDRDKPKPLDIVSNEIILSSLRNSGKVAVMASEEDECPVWITDDGPFVVVMDPLDGSRNIDASIPTGTIFGIYRRLVEIDHLPVEEKALLNCLQSGSKLVAAAYVLYSSATILCASFGSGTHAFTLDHTTGDFLLTHPNINIPPRGQIYSVNDARYFDWPEGLRQYIDTIRQGKGQHPKKYSARYICSLVADFHRTLLYGGVAMNPRNHLRLVYEANPLSFLAEKAGGRGSDGKNRILSIQPVKLHQRLPLFLGSLEDIEELQSYGDVQQKVNPGYDV	0	22.84	0	17.0732	5	12	5	1.894	12.97	9.48509	3	4	5.45	6.23306	2	2	4.88	6.50407	2	2	5.81	7.58808	2	2	5.08	5.69106	2	2	1	1	1	1	1	5	WTSP	Detected by both ITAG and Atlas
Solyc01g106080	Methylmalonate-semialdehyde dehydrogenase (AHRD V1 **** D3BUA7_POLPA); contains Interpro domain(s) IPR010061 Methylmalonate-semialdehyde dehydrogenase IPR015590 Aldehyde dehydrogenase	AT2G14170	MMQFSVHRVKKLRSLTPGIFAVANHHFSVATESSWKHRTSLRVPNLIGGSFVDSQSSEFVDVINPATQEVVSQIPLTTDKEFKSAVSAAKEAFPSWKNTPITTRQRVMLKFQELIRKNMDKLAFNVTTEQGKTLKDAQGDVFRGLEVVEHACGMATLQMGEYGSNVSNGIDTYSLREPLGVCAGICPFNFPAMIPLWMFPVAATCGNTFILKPSEKDPGASMMLAELAMEAGLPDGVLNIVHGTHDVVNAICDDDDIRAVSFVGSNQAGMHIYSRASAKGKRVQSNMGAKNHGVVMPDANIDSTVNALVGAGFGAAGQRCMALSTVVFVGDSKPWEEKLLERAKTLKVNAGTEPDADLGPVISKQAKERVCRLVQSGVDSGAKLLLDGRDIVVPGYEKG…	0	11.119	0	6.34328	2	6	2	0.311	6.55	6.34328	2	2	10.74	6.34328	2	3	NA	0	NA	NA	4.07	3.17164	1	1	NA	0	NA	NA	0	1	0	1	1	3	CIP	Detected by both ITAG and Atlas
Solyc01g106090	Photosystem II oxygen evolving complex protein PsbP (AHRD V1 *-*- B8HJK6_CYAP4); contains Interpro domain(s) IPR002683 Photosystem II oxygen evolving complex protein PsbP	AT4G15510	MRVLQASNIYGVGFGIPSISTRPNSSYHRHATIATGEALAKSAPIGRKFSEQHSLKKGDMEKEGNSVVLEKKDFAVPRRKAMALILSSFVLSNYELPKVAYAQSVEFREYIDTFDGYSFMYPRNWIQVRGAGADIFFRDPLVLDENLSVEISSPSSSKYKSVKDLGPPEEAGKGVLKQYLTEFMSTRLGVRRESSVLSTSSRVADDGKLYYDVEVNIKSYANNNELAVMPQDRVARLEWDRRYLSVLGVENNCLYELRIQTPEKVFVQEESDIRAIMNSFRANKIAA	0	66.859	0	37.2822	11	68	11	6.079	26.2	24.3902	6	9	51.79	26.8293	7	21	35.08	27.8746	8	12	40.65	20.9059	6	15	32.97	19.8606	6	11	1	1	1	1	1	5	WTSP	Detected by both ITAG and Atlas
Solyc01g106210	Chaperone DnaK (AHRD V1 ***- A2Q199_MEDTR); contains Interpro domain(s) IPR012725 Chaperone DnaK	AT5G09590	MATAALLRSLRRREFATSSISAYRTLASNTKPSWCPSLVGAKWAGLARPFSSKPAGNEIIGIDLGTTNSCVAVMEGKNPKVIENSEGARTTPSVVAFNQKGELLVGTPAKRQAVTNPTNTLSGTKRLIGRRFDDPQTQKEMKMVPYKIVKGSNGDAWVEANGQQYSPSQIGAFILTKMKETAEAYLGKSINKAVITVPAYFNDAQRQATKDAGRIAGLDVQRIINEPTAAALSYGMNSKEGLVAVFDLGGGTFDVSILEISNGVFEVKATNGDTFLGGEDFDNALLEFLVSEFKRTEGIDLSKDKLALQRLREAAEKAKIELSSTSQTDINLPFITADASGAKHLNITLTRSKFETLVNNLIERTRNPCKNCLKDAGVSLKDVDEVLLVGGMTRVPKVQ…	0	89.902	0	25.4038	14	48	9	2.511	19.11	9.98532	5	6	66.47	23.6417	13	20	19.68	10.1322	5	7	32.99	14.6843	7	10	16.61	8.07636	4	5	1	1	1	1	1	5	CIP	Detected by both ITAG and Atlas
Solyc01g106260	Chaperone DnaK (AHRD V1 ***- A2Q199_MEDTR); contains Interpro domain(s) IPR012725 Chaperone DnaK	AT4G32208	MTSAGLLLRRSAHKIFASNTKPSWCTSHFGAKWAGLARPFSSKPAGNEIIGIDLGTTNSCVAVMEGKNPKVIENAEGARTTPSVVAFNQKGERLVGSPAKRQAVTNPANTLSGTKRLIGRRFDDPQTQKEMKMVPYKIVRGSNGDAWLEANGQQYSPSQIGAFVLTKMKETAEAYLGKSISKAVVTVPAYFNDAQRQATKDAGRIAGLDVQRIINEPTAAALSYGMNNKEGLVAVFDLGGGTFDVSILEISNGVFEVKATNGDTFLGGEDFDNALLEFLVSEFKRTEGIDLSKDKLALQRLREAAEKAKIELSSTSQTDINLPFITADASGAKHLNITLTRSKFETLVNHLIERTRNPCKNCLKDAGVSLKDVDEVLLVGGMTRVPKVQEIVSEIFGKS…	0	34.883	0	13.4328	8	16	3	0.812	7.37	4.32836	2	2	28.45	11.6418	7	9	2.65	2.53731	1	2	10.21	4.32836	2	3	NA	0	NA	NA	0	1	0	1	0	2	Sporadic	Detected by both ITAG and Atlas
Solyc01g106380	Genomic DNA chromosome 5 BAC clone T12B11 (AHRD V1 ***- Q9FGE8_ARATH)	AT5G64480	MALTIHLLYPNRFPSQFTNSQTNLVPSMYTFKNHPKFHKVSCTNNDDDMNDIDLASDFATEVGKMNTQMIQKEEALKKSKELLFVEFCHYTGLKSEEMKKKWKKFSEEEQWDLVKSFVLEWGAHFHPLSARSVKELVDEYLVENISEFNSSTSSSSSSFFPGLKKLMGFSGDDNE	0.005	3.033	7	6.28571	1	1	1	0.468	NA	0	NA	NA	NA	0	NA	NA	NA	0	NA	NA	NA	0	NA	NA	2.34	6.28571	1	1	1	0	0	0	0	1	1 PSM	Detected by both ITAG and Atlas
Solyc01g106430	Inorganic pyrophosphatase family protein (AHRD V1 **** D7M262_ARALY); contains Interpro domain(s) IPR008162 Inorganic pyrophosphatase	AT5G09650	MAAARIMVSASNTLTASLLSKGPLRRPNNFSLCFRNGPVQKKRLFTCSAIYNPQIQTIEEGQPETLDYRVFFADNSGKKISPWHDIPLHLGDGVFNFVVEIPKESSAKMEVATDEQHTPIKQDTKKGKLRYYPYNIHWNYGLLPQTWEDPTFANTEVEGALGDNDPVDVVEIGDSRGKIGQVLKVKPLAALAMIDEGELDWKIVAISLDDPRASLVNDVDDVEKHFPGTLTAIRDWFRDYKIPDGKPANRFALGNKPANKDYALKIITETNESWAKLVKRSIAAGELSLV	0	107.754	0	33.1034	11	175	10	60.054	143.84	30	10	50	124.98	25.8621	9	44	91.01	24.8276	8	32	59.9	26.2069	8	22	71.88	27.2414	8	27	1	1	1	1	1	5	WTSP	Detected by both ITAG and Atlas
Solyc01g106480	Malate dehydrogenase IPR010097 Malate dehydrogenase, NAD-dependent, eukaryotes and gamma proteobacteria	AT5G09660	MQPSGAEVHQRIARISAHLYPSNPQMGDGSILERTNCRAKGGAAGFKVAILGAAGGIGQPLAMLMKMNPLVSVLHLYDVVNAPGVTADISHMDTGAVVRGFLGQSELEGALTGMDLVIIPAGIPRKPGMTRDDLFKINAGIVRTLCEGIAKCCPNAIVNLISNPVNSTVPIAAEVFKKAGTYDPKKLLGVTSLDVVRANTFVAEVLGLDPREVEVPVVGGHAGVTILPLLSQVKPPCSFTHEETEYLTKRIQDGGTEVVEAKKGAGSATLSMAYAAVKFADVCLKGLRGDAGVVACAFVASQVTELPFFASKVRLGRTGAEEVYQLGPLNEYERIGLEKAKKELAESIQKGISFIRN	0	89.664	0	27.7311	10	74	8	14.849	44.01	20.7283	5	11	42.76	21.0084	5	11	64.38	27.7311	10	17	101.57	27.7311	10	28	26.87	17.0868	4	7	1	1	1	1	1	5	CIP	ITAG only
Solyc01g106620	Pathogenesis-related protein 1a IPR018244 Allergen V5_Tpx-1 related, conserved site	AT4G33730	MGYSNIALIICFLTFAIFHSSQAQNSPQDYLNAHNAARRQVGVGPMTWDNRLAAFAQNYANQRAGDCRMQHSGGPYGENLAAAFPQLNAAGAVKMWVDEKQWYNYNSNTCQAGKVCGHYTQVVWRNSVRLGCARVRCNNGWYFITCNYDPPGNWRGQRPYGDLENQPAFDSKLELPTDV	0	4.501	0	6.70391	1	2	1	0.389	NA	0	NA	NA	NA	0	NA	NA	3.39	6.70391	1	1	3.22	6.70391	1	1	NA	0	NA	NA	0	1	1	0	0	2	1 Peptide	ITAG only
Solyc01g106740	Aspartyl-tRNA synthetase (AHRD V1 **** D8FUD3_9CYAN); contains Interpro domain(s) IPR004524 Aspartyl-tRNA synthetase, class IIb, bacterial/mitochondrial type	AT4G33760	MSLFFRSLPTIAIRSKPSPLTSLPFFFINFHNPITHNPTSLINRTLSSTSVSASPTTPETVVVPNPKVSPSPNALQWVSRNQYCGELSEEDVGKRVRLCGWVALHRIHGGLTFVNLRDQTGIVQITTLPDDFPDAHSTVRDLRLEYVVAIEGVVRPRPAESVNKKMKTGTIEVAAEDVQVLNAVRLKLPFLVTTADDAKDSSKEEIRLRYRCLDLRRPQMSSNIILRHRVVKLLRRYLEDVHDFVEIETPILSRSTPEGARDYLVPSRVQPGTFYALPQSPQLFKQMLMVSGFDKYYQIARCFRDEDLRADRQPEFTQLDMEMAFTSMEDMLKLNEDLIRKVFQEIQGVQLPNPFPRLTYAEAMSRYGSDRPDTRFDVELRDVSDIFSNTTFKVFSDAL…	0	70.444	0	26.9058	15	40	15	3.417	32.21	20.0299	11	13	20.71	13.0045	8	9	24.33	15.6951	8	9	15.19	8.07175	4	6	5.36	5.97907	3	3	1	1	1	1	1	5	WTSP	Detected by both ITAG and Atlas
Solyc01g106980	Endo-1 4-beta-xylanase IPR013781 Glycoside hydrolase, subgroup, catalytic core	AT4G33830	MCLKTPLKPQYNGGIVTNPEFNDGLNGWAVFGVAKVENNISSDGNKFIVASERKGPYHGFSQEFQLDKDKFYIVSGWVQVNHGDDATVAVIFKTQSGYQHAAWANAKSGCWSMFKGGLVVNVSGPAQLYFETNNTVVDIWIDNISVQPFSQEEWTSHQTQTIEKVRKSKVAVQVVDSQGKALPNATISLIQARANFPFGCAINKNILNNNAYQNWFFSRFKYTVFEDEMKWYSNENTQGKVDYSTSDAMVNLCKSKGVSIRGQNVLWDDQKFQPNWVPALSPQQLSVAAGKRVASVVRKYKGQLLHWDVMNENLHFKFFESKLGPSASATFYRLASQFDNKTPLFLNDYNTIEVPSDGQSSPANYLSMIKQVRTGGYAGTLGIGLEGHFGAPSIPYIRA…	0.004	2.307	9	1.3587	1	1	1	0.053	NA	0	NA	NA	NA	0	NA	NA	3.17	1.3587	1	1	NA	0	NA	NA	NA	0	NA	NA	0	0	1	0	0	1	1 PSM	ITAG only
Solyc01g107270	Phosphoribosylformylglycinamidine synthase (AHRD V1 ***- A9Y5J1_ARATH); contains Interpro domain(s) IPR010073 Phosphoribosylformylglycinamidine synthase, eukaryotes and proteobacteria	AT1G74260	MLPPLNPLYPFRPQTLASNPKQNTITPVTRSRVWQWQHLLETLLQQSSYKQIVCFGGTLPRLSPIPYSRKNLRLRSHIPAKIRAVVSKDVSSLVNEDSGEFQEVAEKVIHVYGIPFQQDSATAELLKLVQTKISNQIIGETYEPERLGSESFLDGEKRTSVDAYIIEVGPRLSFTTAWSANAVSICQACGLTEINRMDHSNAFASMVHDRMTECVYAEKLSSFKTSIVPEEVRYIPIMEKGRKALEEINEKMGLAFDEQDLKYYTKLFRDDIKRNPTNVELFDIAQSNSEHSRHWFFTGKLVLDGHPVDKTLMQIVKSTLLTNPNNSVIGFKDNSSAIKGFPVKQLRPTQPGSTCSLDVTDRFLDILFTAETHNFPCAVTPYPGAETGAGGRIRDTHAT…	0	23.453	0	4.72618	7	23	7	0.341	18.38	4.20105	6	7	11.94	2.55064	4	5	10.96	2.92573	4	4	7.25	2.25056	3	4	6.59	2.10053	3	3	1	1	1	1	1	5	WTSP	Atlas only
Solyc01g107330	SWIB/MDM2 domain protein (AHRD V1 ***- D6VG39_9BURK); contains Interpro domain(s) IPR019835 SWIB domain	AT2G14880	MAVSLGLFSVFSTGVTASFAKSDSFSSVRLASPLAAHHVNNLRTVRTVTFATASKPVAEPKKREPRGIMKPRRVSPEMQAFLGGMSEVPRTQALKLIWAHIKANDLQDPQNKKVIICDEKLKTIFGGKERVGFLEIAGLISPHFLK	0	18.965	0	17.8082	2	13	2	0.995	14.02	10.9589	1	3	12.08	17.8082	2	3	11.54	10.9589	1	3	6.91	10.9589	1	2	6.56	10.9589	1	2	1	1	1	1	1	5	WTSP	Detected by both ITAG and Atlas
Solyc01g107700	Kynurenine formamidase IPR007325 Putative cyclase	AT4G34180	MKIPVFLLLLITVTLNPIVSVADSAYPSPYGIETTTSCQSTDLIPVRREVYGNGRIFDITHRLTPDMPSWGLEDGLGQFLWLPKSMKNGSLANNSEMKLPTHTGTHIDAPGHVYDHYFDAGFDVDTLDLEVLNGPALLVDVPRDKNLTADAMQSLHIPKGVKRVLFRTLNTDRRLMWKKAFDTSYVGFMKDGAQWLVDNTDIKLVGIDYLSVAAFDDLLPAHHVFLKSREIILVEGLKLDDIEAGLYTVHCLPLRLLGAEGSPIRCILIK	0.002	3.288	4	3.33333	1	1	1	0.259	NA	0	NA	NA	2.09	3.33333	1	1	NA	0	NA	NA	NA	0	NA	NA	NA	0	NA	NA	0	0	0	1	0	1	1 PSM	ITAG only
Solyc01g107820	UDP-glucosyltransferase family 1 protein IPR002213 UDP-glucuronosyl_UDP-glucosyltransferase	AT2G36770	MGQLHFFFFPMMAQGHMIPTLDMAKLVACRGVKATIITTPLNESVFSKAIERNKHLGIEIDIRLLKFPAKENDLPEDCERLDLVPSDDKLPNFLKAAAMMKDEFEELIGECRPDCLVSDMFLPWTTDSAAKFSIPRIVFHGTSYFALCVGDSIRRNKPFKNVSSDTETFVVPDLPHEIRLTRTQLSPFEQSDEETGMAPMIKAVRESDAKSYGVIFNSFYELESDYVEHYTKVVGRKNWAIGPLSLCNRDIEDKAERGRKSSIDEHACLKWLDSKKSSSIVYVCFGSTADFTTAQMQELAMGLEASGQDFIWVIRTGNEDWLPEGFEERTKEKGLIIRGWAPQVLILDHEAIGAFVTHCGWNSTLEGISAGVPMVTWPVFAEQFFNEKLVTEVMRSGAG…	0.004	2.313	9	2.97872	1	2	1	0.179	2.84	2.97872	1	1	2.58	2.97872	1	1	NA	0	NA	NA	NA	0	NA	NA	NA	0	NA	NA	0	0	0	1	1	2	1 Peptide	ITAG only
Solyc01g107860	CBS domain-containing protein-like (AHRD V1 ***- B8AP73_ORYSI); contains Interpro domain(s) IPR000644 Cystathionine beta-synthase, core	AT4G36910	MESVLNFNSISPICVLNYRLFPTTLSCSPRPLSGDPAVATSRRCLSQRKLSRSLPPASLPSTSANAAASTSNSQSPSDGHYSVGDFMTRKEDLHVVKTTTKVGEALEMLVEKRVTGLPVVDDDWKLVGVVSDYDLLALDSISGAGQADTNLFPDVDSTWKTFNEVQKLLSKTNGKVVGDVMTPSPLSVCENTNLEDAARLLLQTKYRRLPVVDVDGKLVGIITRGNVVRAALQIKRTTDNTN	0	27.276	0	9.09091	4	13	4	3.642	17.82	9.09091	4	6	8.07	9.09091	3	3	7.99	9.09091	2	3	2.39	3.71901	1	1	NA	0	NA	NA	0	1	1	1	1	4	WTSP	Detected by both ITAG and Atlas
Solyc01g107870	Poly(A) RNA binding protein IPR006515 Polyadenylate binding protein, human types 1, 2, 3, 4	AT4G34110	MAQVQVQPQGANASGVNQFVTSLYVGDLDVNVTDSQLYDLFNQLGQVVSVRVCRDLTTQRSLGYGYVNYGNPQDAARALEVLNFTPLSGKPIRIMYSNRDPTVRRSGTANIFIKNLDKAIDHKALHDTFSAFGNILSCKVAVDSSGQSKGYGFVQYDSEDAAQKAIEKLNGMLLNDKQVYVGPFVRKQERDMAVDKTRFTNVFVKNLSEATSEEDLKKAFDEFGAITSIAIMKDEDGKSRSFGFVNFENAEDAARAVEALNGHKFDNKEWFVGRAQKKSEREMELKNRYEQSAKEAVDKSQGLNLYIKNLDDSISDDKLKDMFSTYGTITSCKVMRDPSGVSKGSGFVAFSSPEEASRALAEMNGKMIVSKPLYVALAQRKEERRARLQAQFSQMRPIG…	0	10.662	0	6.06532	3	3	3	0.304	NA	0	NA	NA	5.4	4.19907	2	2	NA	0	NA	NA	3.26	1.86625	1	1	NA	0	NA	NA	0	1	0	1	0	2	CIP	ITAG only
Solyc01g107920	Os07g0175100 protein (Fragment) (AHRD V1 ***- Q0D898_ORYSJ)	no hits	MNPRNLAALLSSLIAQLLLLITVVFPSSNPLCITNSSLSHFLTPLLLHFLSVSETAATLSRKRKRIHFSEFDAPEGEGLTRFKLGRPDSFIRRNPDCFKKFFNINSSTFDWLCGLLEPLLECRDPVDSPLNLAAETRLGIGLFRLATGANFSDVSRRFTVSESVAKFCFKQLCRVLCTNFRFWVGFLNSGELESVSNRFESISGIPNCCGVLCCVRFKVNEESIAAQLVVDSSSRIISIIAGFRGDKTDFQVLNSSTLFEDIEKGTIFTNSQGLEINGVSVPQFLVGNGDYPLLNWLMLPFDDPISQSNEEKFNNAINVMRLPSVIAVQSLRNWGVLREPIEGEIKTVVASIGACSILHNMSLSRDDYSAFCDDLNEYSPDKRKSCSNPGETKTVACSI…	0.032	1.884	45	1.69082	1	1	1	0.11	NA	0	NA	NA	NA	0	NA	NA	NA	0	NA	NA	2.04	1.69082	1	1	NA	0	NA	NA	0	1	0	0	0	1	1 PSM	Atlas only
Solyc01g108020	Thioredoxin m (AHRD V1 ***- B9HS17_POPTR); contains Interpro domain(s) IPR015467 Thioredoxin, core	AT2G15570	MAASASCATPYSKSPSSLSRSLSLQYRELCNLPYKCKQHQNVRIGLSVENDKGFGTWKTSSPSSLRVFCIRDTQAAAVTAKSWDKLILGSDTPVLVEFHATWCGPCQMVHRVIDEIAGEYSGRLKCYVLDADREPKVAENYDIKAVPVVLLFKNGEKFESVIGTMSKEFYVAAIERLLSS	0	10.123	0	21.1111	4	22	4	0.848	6.04	21.1111	4	5	9.53	21.1111	4	5	8.75	21.1111	4	5	9.25	21.1111	4	5	3.7	9.44444	2	2	1	1	1	1	1	5	WTSP	Detected by both ITAG and Atlas
Solyc01g108030	Methylcrotonoyl-CoA carboxylase beta subunit IPR000022 Carboxyl transferase	AT4G34030	MLRIWTKRRLASQCLIPWRMYPTTLISTRNSSSGILHDTLDRNSDSYTRNSKVMDELVSQLHSHILKVMEGGGPEAVKRHRSRNKLLPRERIDRLIDPGSSFLELCQLAGHELYQEPLPSGGIVIGIGTIHKRLCMLVANDSTVKGGSYFPITVKKHLRAQEIAAQCKLPCIYLVDSGGAFLPKQAEVFPDKENFGRIFYNQAVMSSEGIPQIALVLGSCTAGGAYIPAMADESVMVKGNGTIFLAGPPLVKAATGEEVSAEDLGGATVHCKTSGVSDYFAHDELHALAIGRDIVKNLHMAGGPEVSGQTRADYKEPLYDVKELRTVAPTDLKQPFDVRSIIARILDGSEFDEFKKLYGTTLVTGFGRICGQPVGILGNNGILFMESAQKGAHFIELCT…	0	7.25	0	2.63158	1	2	1	0.16	NA	0	NA	NA	5.56	2.63158	1	2	NA	0	NA	NA	NA	0	NA	NA	NA	0	NA	NA	0	0	0	1	0	1	1 Peptide	ITAG only
Solyc01g108070	DJ-1 Homolog C	AT4G34020	MWSAPRIDPITTTAASAPPKKVLVPIGFGTEEMEAVILADVLRRAGAEVTVASVEKQLEVEAYGGTRLVADTFISACSTEIFDLVALPGGMPGSARLRDCEVLQKITSRQAEEKRLYGAICAAPAVALLPWGLLKRKQTTCHPAFIDKISSFRAVKTNTQVSGELTTSRGPGTSFEFAICLVEQLFGEPVAREIGELLLMNPAGDDPKRQEFNEVGWSLDRTPQVLIPIANGSEEIEVVTLIDILRRAKVNVVVASVEKSAQVLASSGTKIVADKLINATSDSIFDLIILPGGTAAAERLHKSKILKKLLKEQESAGRIFGAICSSPAVLQKQGLIKDKKATAHPAVLDKLKDGVNDAQVVIDGKLITSQGLATAIQFALAIVSKLFGHARARSVAEGL…	0.002	4.231	3	2.95567	1	1	1	0.145	2.44	2.95567	1	1	NA	0	NA	NA	NA	0	NA	NA	NA	0	NA	NA	NA	0	NA	NA	0	0	0	0	1	1	WTSP	Detected by both ITAG and Atlas
Solyc01g108150	Oxidoreductase zinc-binding dehydrogenase family protein IPR002085 Alcohol dehydrogenase superfamily, zinc-containing	AT5G37980	MELKPGLSALVTGGASGIGKALCLALAKKGVFVTIVDSSEERGKEVAGLAEKECAEFHSGLKFPVVMFIRSDVTNTGELKAAFEKHCTTYGGLDICINSAGIGDYVQFHNDQTDGSKSWRHVVNVNLVAVIDSTRLAIQAMQTAQKPGVIINLGSASGLYPMFTGPIYSATKGGVVMFTRSLARFKRQGIRINVLCPEFVQTDLAEKAAASSIARFGGYLPMKLVVEGAFELIRDESKAGSCLWITNRRGMEYWPTPAEEAKYLLRSSKARKKSLVTVPMDLQIPHSFEKVVVHTLSHNFRSATRIVRTELRLPLKPDHVLLKVIYAGVNASDVNFSSGRYFSGNGKDITSLLPLDSGFEAVGVIAALGDGVRNLKIGVPAAIMTFGGYAEFVMVPTKH…	0	8.557	0	1.73502	1	8	1	0.28	4.76	1.73502	1	2	1.95	1.73502	1	1	NA	0	NA	NA	5.86	1.73502	1	3	4.89	1.73502	1	2	1	1	0	1	1	4	1 Peptide	ITAG only
Solyc01g108200	cDNA clone J013057C16 full insert sequence (AHRD V1 *-*- B7F5R8_ORYSJ)	AT3G19220	MLPLINSCSIFTPLSSSLLPPRRSTVISCQAAADPSAAGGPSSFRWWFNFGAAASAAAAPGFGRNSQNSDEVADNGIGNNIKKKKTKVNAKERRWSRNRESYLADDGDALPLPMTYPDTSPCSPEEIDRRLQCDPIIEDCKQVVYEWTGKCRSCQGTGLVSYYNKKGKETICKCIPCAGIGYVQKITLRTDIDVMVDLDDKPP	0	6.418	0	6.89655	1	3	1	0.931	2.97	6.89655	1	1	2.01	6.89655	1	1	NA	0	NA	NA	2.86	6.89655	1	1	NA	0	NA	NA	0	1	0	1	1	3	WTSP	Detected by both ITAG and Atlas
Solyc01g108600	Presequence protease, mitochondrial (AHRD V1 **-- PREP_DANRE); contains Interpro domain(s) IPR013578 Peptidase M16C associated	AT1G49630	MERAVLLRSLSSTSTLAFSRIFSRSSHRFASYSARRHRLLQNLQRRRSLVRSNVRGISSSINLKRQFYPLSVRAIATSSPQSSQEFLGADDEVAEKFGFEKVSEQFIDECKSKAVLYKHKKTGAEVMSVSNDDENKVFGVVFRTPPKDSTGIPHILEHSVLCGSRKYPLKEPFVELLKGSLNTFLNAFTYPDRTCYPVASTNTKDFYNLVDVYLDAVFFPKCVEDFQTFQQEGWHYELNDPSDEITFKGVVFNEMKGVYSQPDNLLGRTSQQALFPDNTYGVDSGGDPRVIPSLSFEDFKEFHRKFYHPSNARIWFYGDDDPNERLRILSEYLNMFDASSAPHESRVEPQRLFSEPVRIVEKYPVGEDGDLKKKHMVCVNWLLSDKPLDLETELALGFL…	0	339.957	0	41.3246	54	266	54	26.953	223.88	36.0075	44	72	168.46	32.4627	36	57	150.82	29.1978	33	47	139.88	30.4104	30	50	116.46	24.8134	27	40	1	1	1	1	1	5	WTSP	Detected by both ITAG and Atlas
Solyc01g108630	Nitrite reductase (AHRD V1 ***- Q76KB0_TOBAC); contains Interpro domain(s) IPR006067 Nitrite and sulphite reductase 4Fe-4S region	AT2G15620	MASFSIKFLAPSLPNPTRFSKSSIVKLNATPPQTVAAAGPPEVAAERLEPRVEEKDGYWILKEQFRQGINPQEKVKIEKEPMKLFMENGIEELAKIPIEEIDQSKLTKDDIDVRLKWLGLFHRRKNQYGRFMMRLKLPNGVTTSAQTRYLASVIRKYGEEGCADITTRQNWQIRGVVLPDVPEILKGLEEVGLTSLQSGMDNVRNPVGNPLAGIDPEEIVDTRPYTNLLSQFITGNSRGNPAVSNLPRKWNPCVVGSHDLYEHPHINDLAYMPAIKDGRFGFNLLVGGFFSAKRCDEAIPLDAWVPADDVVPVCKAILEAFRDLGFRGNRQKCRMMWLIDELGVEGFRAEVVKRMPQQELERASPEDLVQKQWERRDYLGVHPQKQEGYSFIGLHIPVG…	0	175.668	0	43.7819	27	179	19	18.307	130.59	42.4191	26	49	115.33	41.0562	24	43	86.43	31.5162	19	34	76.03	22.8279	12	26	58.76	22.6576	14	27	1	1	1	1	1	5	WTSP	Detected by both ITAG and Atlas
Solyc01g108660	N-acetyl-gamma-glutamyl-phosphate reductase (AHRD V1 ***- A7WPL0_TOBAC); contains Interpro domain(s) IPR000706 N-acetyl-gamma-glutamyl-phosphate reductase	AT2G19940	MASLAALNSNLFNGGCLWKYQDELKVSKAGKLRIRVTSMASSSPAQSLQFADGKANKLDKLRVGVLGASGYTGSEIIRLLRNHPYFQITLMTADRKAGQSIESVFPHLVTQDLPNLVAVKDADFSAVDAVFCCLPHGTTQEIIKSLPTNLKVVDLSADFRLQDIAEYEEWYGQPHKATALQKEAVYGLTEISRREIQSARLVANPGCYPTSVQLPLIPLIKSNFIEVRNIIIDSKSGVSGAGRGAKEANLYTEIAEGIHSYGITRHRHVPEIEQGLSEAANSKVTVSFTPHLMPMSRGMQSTIYVEMAPGMTTQDLKDHLGNYYEHEEFVVLLKNKEVPHTRHVRGSNYCLMNVFPDRIPGRAIIISVIDNLVKGASGQALQNLNLMMGIPENLGLGCL…	0	63.556	0	24.8139	9	66	9	5.661	56.3	19.1067	7	16	49.59	22.5806	8	14	35.86	20.8437	6	12	39.32	19.1067	7	14	28.81	22.5806	7	10	1	1	1	1	1	5	WTSP	Detected by both ITAG and Atlas
Solyc01g108910	COSII_At2g15890 (Fragment) (AHRD V1 *-*- C0KFD9_9SOLN)	AT2G15890	MMLQSMALNSLSSTSLVGVNNELHSSRFQVNSSTIRCCSRSHAYIPKLEPFSRTKFDRVFKDPPLIEKSENELADYCSVLEGDDSYSCWQAYFELKDLEKEAPKEEVERLILQAGGVKTLIGCLHGVSDMHKAKKESKESAKPVNLDAQRAGGLCPIPDGLPKSREELEEEEKARMPDSPYTKLLRAKGTHPVWY	0	33.924	0	28.7179	6	27	6	7.111	32.85	28.7179	6	11	19.12	22.0513	4	8	13.57	16.9231	3	4	4.35	10.7692	2	2	4.57	9.74359	2	2	1	1	1	1	1	5	WTSP	Detected by both ITAG and Atlas
Solyc01g109300	4-hydroxy-3-methylbut-2-enyl diphosphate reductase (AHRD V1 ***- A2TGW4_9LAMI); contains Interpro domain(s) IPR003451 LytB protein	AT4G34350	MAIPLQFSSISTRTDLSLPETRTFRLPKPFSVIRCSAGEPVPSSSATAESEFDAKVFRKNLTRSANYNRKGFGHKEATLELMNREYTSDIIKKLKENEFEYTWGNVTVKLAESYGFCWGVERAVQIAYEARKQFPTERIWITNEIIHNPTVNKRLEDMDVKNIPLEEGKKNFDVVDKDDVVVLPAFGAAVDEMLVLSDKNVQIVDTTCPWVTKVWNTVEKHKKGEYTSIIHGKYAHEETVATASFAGKYIIVKNMAEATYVCDYILGGKLDGSSSTKEAFMQKFKYAVSEGFDPDVDLVKAGIANQTTMLKGETEDIGKLVERTMMQKYGVENVNNHFVSFNTICDATQERQDAMYKLVEQKLDLMLVIGGWNSSNTSHLQEIAEERGIPSYWIDSEQR…	0	109.48	0	29.718	16	89	16	4.843	60.86	23.2104	10	19	57.33	20.1735	9	16	61.38	26.0304	12	19	45.93	20.6074	9	18	57.08	22.3427	9	17	1	1	1	1	1	5	WTSP	Detected by both ITAG and Atlas
Solyc01g109520	Ras-related protein Rab-7 IPR002078 RNA polymerase sigma factor 54, interaction	AT1G49300	MPSRRRTLLKVIILGDSGVGKTSLMNQYVNKKFSNQYKATIGADFLTKEVQFEDRLFTLQIWDTAGQERFQSLGVAFYRGADCCVLVYDVNSMKSFENLNNWREEFLIQASPSDPENFPFVVLGNKVDVDGGNSRVVSEKKARAWCASKGNIPYFETSAKEGTNVEEAFQCIAKNALKSGEEEEIYLPDTIDVAASSQQRTGGCEC	0.002	3.021	5	4.85437	1	1	0	0.179	NA	0	NA	NA	2.05	4.85437	1	1	NA	0	NA	NA	NA	0	NA	NA	NA	0	NA	NA	0	0	0	1	0	1	1 PSM	ITAG only
Solyc01g109540	Coatomer subunit gamma IPR017106 Coatomer, gamma subunit	AT4G34450	MAQPLVKKDDDRDDEMDYSPFMGIEKGAVLQEARVFNDPQLDARRCSQVITKLLYLLNQGEAFTKVEATEVFFSVTKLFQSKDIGLRRMVYLIIKELSPSADEVIIVTSSLMKDMNSRTDMYRANAIRVLCRITDGTLLTQIERYLKQAIVDKNPVVASAALVSGIHLLQTNPEIVKRWSNEVQEAVQSRAALVQFHALALLHQIRQNDRLAVSKLVTSLTKGSVRSPLAQCLLIRYTSQVIRESGISQTGDRPFYDYLESCLRHKAEMVIFEAARAITELNGVTTRELTPAITVLQLFLSSSKPVLRFAAVRTLNKVAMTHPMAVTNCNIDMESLISDQNRSIATLAITTLLKTGNESSIDRLMKQITNFMSDIADEFKIVVVEAIRSLCLKFPLKYR…	0.002	3.659	3	1.24153	1	3	0	0.058	2.58	1.24153	1	1	3.11	1.24153	1	1	0	1.24153	1	1	NA	0	NA	NA	NA	0	NA	NA	0	0	1	1	1	3	1 Peptide	ITAG only
Solyc01g109660	Glycine-rich RNA-binding protein IPR015465 RNA recognition motif, glycine rich protein	AT4G39260	MADVEYRCFVGGLAWATTDQTLSEAFSQYGEVVESKIINDRETGRSRGFGFVTFKDEQAMRDAIEGMNGQDLDGRNITVNEAQSRGGGGGGGGRGGGGYGGGRREGGGGGYGGGGGYGGGRREGGGGGYGGGGYGGGRREGGYGGGGGGYGGGDRYNDRSSRGGGGGGSDGNWRN	0	60.145	0	60	10	50	8	11.328	17.81	29.1429	4	6	35.35	60	8	16	32.09	52	6	10	29.67	40.5714	5	9	30.08	52	8	9	1	1	1	1	1	5	CIP	ITAG only
Solyc01g109790	Glucose-1-phosphate adenylyltransferase (AHRD V1 **** Q15I66_SOLLC); contains Interpro domain(s) IPR011831 Glucose-1-phosphate adenylyltransferase IPR005836 ADP-glucose pyrophosphorylase, conserved site	AT4G39210	MDTCCAAMKSTVHLGRVSTGGFNNGEKEIFGEKIRGSLNNNLRINQLSKSLKLEKKIKPGVAYSVITTENDTETVFVDMPRLERRRANPKDVAAVILGGGEGTKLFPLTSRTATPAVPVGGCYRLIDIPMSNCINSAINKIFVLTQYNSAALNRHIARTYFGNGVSFGDGFVEVLAATQTPGEAGKKWFQGTADAVRKFIWVFEDAKNKNIENILVLSGDHLYRMDYMELVQNHIDRNADITLSCAPAEDSRASDFGLVKIDSRGRVVQFAEKPKGFELKAMQVDTTLVGLSPQDAKKSPYIASMGVYVFKTDVLLKLLKWSYPTSNDFGSEIIPAAIDDYNVQAYIFKDYWEDIGTIKSFYNASLALTQEFPEFQFYDPKTPFYTSPRFLPPTKIDNC…	0	18.995	0	14.6947	6	13	5	0.562	11.41	10.3053	4	4	7.89	7.82443	3	3	6.14	6.87023	3	3	7.8	7.44275	3	3	NA	0	NA	NA	0	1	1	1	1	4	WTSP	Detected by both ITAG and Atlas
Solyc01g109850	Diaminopimelate decarboxylase (AHRD V1 **** D2DKE7_SOYBN); contains Interpro domain(s) IPR002986 Diaminopimelate decarboxylase	AT3G14390	MAATHLVSHSPSLHKSLKYPSNASQKLSFFKPNFPLKPISRNLSIRASVSTSEPQTQKFQHCFKKCEDGFLYCEGVKVEDVMETVERRPFYLYSKPQITRNVEAYKAALEGLDSIIGYAIKANNNLKILEHLRSLGCGAVLVSGNELKLALGAGFDPTKCIFNGNGKLLEDLVLAAQAGVFVNIDSEFDLDNIVAAARLAGKKVNVLLRINPDVDPQVHPYVATGNKSSKFGIRNEKLQWFLDAVKAHPQELKLVGAHCHLGSTITKVDIFRDAAALMVNYIDEIRSQGFEIDYLNIGGGLGIDYYHAGAILPSPRDLINTVRELVLSRNLNLIIEPGRSLIANTCCLVNRVTGVKTNGTKNFIVIDGSMAELIRPSLYDAYQHIELVSPPPPEAAIAK…	0	130.323	0	34.1667	16	143	16	9	95.07	28.9583	13	30	71.71	26.6667	12	24	108.07	31.4583	14	36	88.75	28.125	12	34	53.59	21.0417	8	19	1	1	1	1	1	5	WTSP	Detected by both ITAG and Atlas
Solyc01g109930	Inositol monophosphatase family protein (AHRD V1 **** D7MGB6_ARALY); contains Interpro domain(s) IPR011809 Histidinol-phosphate phosphatase, putative, inositol monophosphatase	AT4G39120	MQMLSQSHFLSLYPRNSSPLSSSFSAFSGGCNTRKIVSGSLAFQHSGIHSFPISHGIKLASPVMTSNCVLPSNQAQIVDFGVEDSELGKFAAVGNKIADAAGEVIRKYFRKSFDILDKEDLSPVTIADQAAEESMVKIIQENFPSHAIYGEEKGWRCQEETAEYVWVLDPIDGTKSFITGKPVFGTLIALLYKGKPILGVIDQPVLRERWIGLSGRRTTLNGQEISTRNCSSLSKAYMYTTSPHLFEGDAEIAFARVRSKVKVPLYGCDCYAYALLASGFVDLVVESGLKPYDFLSLVPVIEGAGGTITDWKGQHFNWKASAGSPATSFNVVAAGDKEVHQEALDALQWR	0	27.204	0	16.5714	5	21	5	2.162	16.11	13.4286	4	5	16.22	8.57143	2	4	8.62	8.57143	2	2	14.36	13.4286	4	5	12.95	14.5714	4	5	1	1	1	1	1	5	WTSP	Detected by both ITAG and Atlas
Solyc01g109990	RNA-binding protein 28 (AHRD V1 *--- B0X2T7_CULQU); contains Interpro domain(s) IPR012677 Nucleotide-binding, alpha-beta plait	AT2G21440	MGKNKKTMSGGDSQHSPSTIFVNNLPYSFTNAQLEETFSEVGPIRRCFMVTNKGSSEHRGFGFVQFASVDDANRSIELKNGSVVGGRKIGVKQAMQRAPREQRQSKGDQESTAKAKDGKDGPSAESVESVEDKEASNMEGTGSTAQAKDGKNGPSTESAKLKQASNPQSIAQEKDGKDGASTEAAKHKQASSRQGTENSGKPARKKKATLLSNGAADDGNYSGKQRVARTVIIGGIVNANMAKEAHQLAAECGTICSITYPLPKEEIENHGLAHDGCQMDASSVLFTSVKSAQACVASLHQKEVHGATLWARQLGGEGSKTQRWKLILRNLPFKAKVNEIKDMFSKVGFVWDVFIPKNFETGLSKGFAFVKFTTKQDAENAIKTFNGKTMNKRTIAVDW…	0.004	3.254	5	1.3834	1	1	1	0.053	NA	0	NA	NA	NA	0	NA	NA	NA	0	NA	NA	2.96	1.3834	1	1	NA	0	NA	NA	0	1	0	0	0	1	1 PSM	Detected by both ITAG and Atlas
Solyc01g110020	BAH-PHD domain-containing protein (Fragment) IPR001025 Bromo adjacent region	AT4G39100	MAKTRTNRRTLDSYTVKSINKTVRAGDCVLMRASESSKPSYVARVEKIESDNRGGNVRVHVRWYYRPEESIGGRRQFHGSKELFMSDHRDIQSADTIEGKCTVHTFKSYTKLDAVGNEDFFCRFDYNSSTGAFNPDRVAVYCKCEMPYNPDDLMVQCEGCSDWFHPTCIDMTPEEAKRLDHFFCQNCSSEDQKKLLNSHATSRHADIKVESKRRRR	0.004	2.606	9	5.09259	1	1	1	0.179	NA	0	NA	NA	NA	0	NA	NA	NA	0	NA	NA	2.28	5.09259	1	1	NA	0	NA	NA	0	1	0	0	0	1	1 PSM	ITAG only
Solyc01g110160	Chromosome 11 contig 1 DNA sequence (AHRD V1 ***- Q00YQ5_OSTTA)	AT2G21385	MATILSLNPLAIRRFSSNSQCYLHRTMRIGQAAIHFQKNYPVSFVGFLQFSKRRNFICAVSKDAEESFKKTVEVDRLIDTLREASDKELPQIVVENVLAFNESFWIRLAARADTCKSDDDKKDYEELALTVMNIVDRLVHKTNEKIEASTDVLKAILKPVIDEVEEISWPLRDPEAVSLMEKEINQREQEGQLDEGFLAEVNAQLRQATKDGDKPGLEAMLQKVLQLYASRVLSKRSYAKKGNEVLKAEQFLETIIKAPEEVWNKLLLDGMTLGKGDISPEELYAVIKKRMERTLIRTEGGSYQQRVLIEYLKGIESRAGEIVRVLQG	0	65.978	0	36.8902	13	51	13	5.449	39.34	32.622	11	15	31.51	29.5732	10	13	17.29	17.9878	5	6	22.82	25.6098	8	9	19.12	15.5488	5	8	1	1	1	1	1	5	WTSP	Detected by both ITAG and Atlas
Solyc01g110360	Fructose-bisphosphate aldolase (AHRD V1 ***- B0FPD8_SOLTU); contains Interpro domain(s) IPR000741 Fructose-bisphosphate aldolase, class-I	AT4G38970	MASASLLKSSPVLDKSEFLKGQSLRQPSVSVVRCHPTNATSLTVRAASSYADELIKTAKTVASPGRGILAMDESNATCGKRLASIGLENTEANRQAYRTLLVSAPGLGQYISGAILFEETLYQSTVDGRKIVDVLIEQNIVPGIKVDKGLVPLAGSNDESWCQGLDGLASRSAAYYQQGARFAKWRTVVSIPNGPSALAVKEAAWGLARYAAISQDNGLVPIVEPEILLDGEHGIDRTFEVAQKVWAEVFFYLAENNVMFEGILLKPSMVTPGAECKDRATPQQVADYTLSLLKRRIPPAVPGIMFLSGGQSEVEATLNLNAMNQAPNPWHVSFSYARALQNTCLKTWGGQPENVKAAQDTLLVRAKANSLAQLGKYTGEGESDEAKQGMFVKGYVY	0	123.116	0	41.3098	20	296	9	18.953	204	41.0579	19	81	156.64	33.7531	14	58	140.41	35.0126	15	53	146.83	35.5164	16	55	135.66	35.2645	16	49	1	1	1	1	1	5	WTSP	Detected by both ITAG and Atlas
Solyc01g110520	Glucosamine--fructose-6-phosphate aminotransferase (AHRD V1 *-*- GLMS_METKA); contains Interpro domain(s) IPR005854 Amidophosphoribosyl transferase	AT4G34740	MAAAVSTAVTNKSHLSSALDKPFTTPSQKLLSLAVKTLPKPYHHHHRTLITAASKNPLTDVVSSKPIPDGRSFDSYFHDDDDKPREECGVVGIYGDSEASRLCYLALHALQHRGQEGAGIVCVNDNVLKSITGVGLVSDVFSESKLDQLPGDLAIGHVRYSTAGSSMLKNVQPFVASYRFGSVGVAHNGNLVNYKQLRGELEENGSIFNTSSDTEVVLHLIAISKARPFLLRIVEACEKIEGAYSMVFATEDKLVAVRDPYGFRPLVMGRRSNGAVVFASETCALDLIEATYEREVLPGEVVVVDKEGVQSICLMPHPEPKSCIFEHIYFALPNSVVFGRSVYESRRAFGEILATEAPVECDVVIAVPDSGVVAALGYAAKAGVPFQQGLIRSHYVGRT…	0	47.315	0	22.357	11	35	10	1.154	18.13	12.4783	6	8	15.9	9.18544	4	5	25.36	11.4385	6	9	21.94	18.5442	8	10	8.89	6.93241	3	3	1	1	1	1	1	5	WTSP	Detected by both ITAG and Atlas
Solyc01g110550	Ribosome-binding factor A (AHRD V1 **** B6TDG2_MAIZE); contains Interpro domain(s) IPR000238 Ribosome-binding factor A	AT4G34730	MQNLVIQIPRLRPLPPSTQCLLPATMSLSPAKHINLRQFDSRELKTNSRSVNRRFIRCMANPRRVKMVAKQIRRELSDMLLTDKVLQYAVLPEAALGADRYLSSLTTISDVEVSTDLQVVKVYVSVFGDERGKEVALTGLKSKAKYVRSELGRRMKLRLTPEIRFIEDESLERGSRVLAILDRIKDENENKDSPNDGSSESDYDGDWEGDDPDDEGIIYVK	0	19.886	0	19.457	5	16	5	2.981	13.93	19.457	5	5	10.02	15.3846	4	4	2.77	4.0724	1	1	5.46	14.4796	3	3	5.89	14.4796	3	3	1	1	1	1	1	5	WTSP	Detected by both ITAG and Atlas
Solyc01g110960	Glutamic acid-rich protein	AT5G27330	MAKKKTTPQDNQPQNPTEVVKENQVKENNHSIAMEEASEKLENLKNLNSMLLKETIEKRQQVDSLVQAKGCLESELKRSNSEKSELQTELTQLSEQVVRLEIEKKLVSVFVAVQIGYHAEVIESERNGFREQNDVVEKKLKSVEVEMRDVLREKGEIEKLLTEKESEIENLRKQLNAVADEVAHERNVLEGIRKEKDEIKMKLDAQIEEADGLRVRLVETEKREKEIEGEVGKLRVEYDALTEKIKDRESKIQSMVREKELVANSLLGSNKVIEELRGQIDGIVREKEGIEVERNAEMKKNGELQNTVAGLDDMVLSLQKEEAKLRENLAGLEKKCLEGLRKEEEMEKRINELVKGNNEKDIRVENLIEEKALVEKELDKALKQLDVEKKKVEQTVTAK…	0.002	3.06	5	2.13415	1	1	1	0.054	NA	0	NA	NA	3.03	2.13415	1	1	NA	0	NA	NA	NA	0	NA	NA	NA	0	NA	NA	0	0	0	1	0	1	1 PSM	ITAG only
Solyc01g111020	Pentatricopeptide repeat-containing protein (AHRD V1 *-*- D7L4E9_ARALY); contains Interpro domain(s) IPR002885 Pentatricopeptide repeat	AT4G34830	MDSIFSPKLSLLSCSPISSSLVPRRQFLSGSTHSLRPPGLHSRRRCRNIGFQFGGNTSRFVLRASLDSQTVVFASVVTISALTVVFLEFSKRNTNANAKFKEISAELTLALRRQIRHVMNWFPRHVFALINIQEEKSVKTQMKEVTKVSNEREDGEADVLQHDGTYLIQTFVTNNIESLDTNQLAPSSNGSLTLGASVPNEHTESDAVPSSFVADSNNIYLQENIQTTKMSNILTTEEENLRTTKMSNILTTEEVREPEPIAHTESDAVPSSFMEESKNINLQEHLHETKMSNILTTEEVSSERSVALFPTINIDNRTEKTKIMDQELMMKDELKKAHRFVAEDEVIIHNLIFRDSTREDLYSFFGASSKSLNGQDALTSHASRQGIGTFSPPSKAFSV…	0	45.864	0	11.0147	11	24	11	0.573	15.04	4.8569	5	6	14.74	4.94363	5	5	7.68	2.77537	3	3	15.99	5.98439	6	6	9.86	2.8621	3	4	1	1	1	1	1	5	WTSP	Detected by both ITAG and Atlas
Solyc01g111060	5&apos-methylthioadenosine/S-adenosylhomocysteine nucleosidase (AHRD V1 **** D4FIY6_STAEP); contains Interpro domain(s) IPR018017 Nucleoside phosphorylase, family 1	AT4G34840	MGGLTTLSIKSSPIIDRTSYHFDSQFLNRKKFSKELPVKMAPPHGDKSAEVKEEAAAAVSSVDNRPISTILFIVAMQTEALPLVKKFQLTEDLNSVFPKGVPWVRFYGNYKGLTVNIVCPGKDPALGVDGVGTVSASLVTYASVQALKPDLIINAGTAGGFGAKGASIGDVFISSEVAFHDRRIPIPVFDIYGVGSRKAFATPNLLKELNLKVGKLSTGDSLDMSPMDEASIIANDATIKDMEGAAVAYVADLLKVPAIFVKAVTDIVDGDKPTPEEFLENLVAVTAALDQTATQVVDYISGKCLVEL	0.076	1.38	111	2.27273	1	2	1	0.194	1.83	2.27273	1	1	0	2.27273	1	1	NA	0	NA	NA	NA	0	NA	NA	NA	0	NA	NA	0	0	0	1	1	2	1 Peptide	Atlas only
Solyc01g111120	Triosephosphate isomerase (AHRD V1 **** D6N3G7_GOSHI); contains Interpro domain(s) IPR000652 Triosephosphate isomerase	AT2G21170	MAVASTSLASQMSGPKSVTSISCPQFSGLRKSLSKLDNSVSFSTSQAFFQNVDSHLRISSDRKGCRAVVAMAGSGKFFVGGNWKCNGTKDSISKLVSDLNSAQLESDVDVVVAPPFLYIDQVKNSLTDRIEVSAQNCWTGKGGAFTGEISVEQVKDLGCKWVILGHSERRHVIGENDEFIGKKAAYALSQGVGVIACIGELLEEREAGKTFDVCFQQLKAFADAIPSWDNVVIAYEPVWAIGTGKVASPEQAQEVHVAVRDWLTKNVSAEVASKTRIIYGGSVNGSNSSDLAKKEDIDGFLVGGASLKGPEFATIVNSVTAKKVAA	0	114.596	0	32.5153	11	262	4	20.544	201.22	32.5153	11	59	183.72	32.5153	10	53	205.09	28.2209	9	61	153.28	27.9141	8	49	136.62	32.5153	10	40	1	1	1	1	1	5	WTSP	Detected by both ITAG and Atlas
Solyc01g111170	Peptidyl-prolyl cis-trans isomerase (AHRD V1 ***- Q9XF12_SOLTU); contains Interpro domain(s) IPR002130 Peptidyl-prolyl cis-trans isomerase, cyclophilin-type	AT2G16600	MANPKVFFDLTIGGAPAGRVVMELFADTTPKTAENFRALCTGEKGVGKMGKPLHYKGSTFHRVIPGFMCQGGDFTAGNGTGGESIYGAKFNDENFVKKHTGPGILSMANAGPGTNGSQFFICTAKTEWLNGKHVVFGQVVEGMDVIKKAEAVGSSSGRCSKPVVIADCGQL	0	13.775	0	23.9766	3	12	3	0.874	5.82	16.9591	2	2	3.51	8.18713	1	1	8.13	8.18713	1	3	11.82	23.9766	3	4	5.75	8.18713	1	2	1	1	1	1	1	5	CIP	Detected by both ITAG and Atlas
Solyc01g111630	Glyoxylate_hydroxypyruvate reductase B IPR006140 D-isomer specific 2-hydroxyacid dehydrogenase, NAD-binding	AT1G68010	MAKPVQIEVWNPNGKYRVVSTKSMPGTRWINLLIQQDCRLEICTEKKTILSVDDILALIGDRCDGVIGQLTEDWGDTLFSALSKAGGKAFSNMAVGYNNVDVEAANKYGVAVGNTPGVLTETTAELAASLSLAAARRIVEADEFMRAGKYEGWLPHLFVGNLLKGQTVGVIGAGRIGSAYARMMVEGFKMNLIYYDLYQSTRLEKFVTAYGQFLKANGEQPVTWKRASSMEEVLQEADVISLHPILDKTTYHLVNKERLALMKKEAILVNCSRGPVIDEVALVEHLRENPMFRVGLDVFEDEPYMKPGLADMKNAVVVPHIASASKWTREGMATLAALNVLGKIKGYPIWSNPNSVEPFLNENAPPPAACPSIVNSKALGLPVSKL	0	61.215	0	29.7927	11	46	11	5.31	33.65	23.5751	8	11	42.61	24.6114	9	14	27.22	19.6891	7	9	21.2	18.9119	6	7	11.95	13.2124	4	5	1	1	1	1	1	5	CIP	ITAG only
Solyc01g111640	Skp1 IPR016897 E3 ubiquitin ligase, SCF complex, Skp subunit	AT2G20160	MSSPKKILLKSNDGEVFEVEEAVALESQTIKFLIEDDCAGSHIPISNVSGNILAKVLEYLKRHVEEESTSKTEGADADAALKVFDAEFVKVDQKTLFDLILAANYLNIKSLLDLTCQTVADMIKGKTPEAIRNTFNIKNDFTPEEEEEVRRENAWAFE	0.002	3.201	5	7.59494	1	1	0	0.259	NA	0	NA	NA	NA	0	NA	NA	NA	0	NA	NA	2.49	7.59494	1	1	NA	0	NA	NA	0	1	0	0	0	1	1 PSM	ITAG only
Solyc01g111750	Heat shock protein DnaJ domain protein (AHRD V1 *--- B7K9K5_CYAP7)	AT5G23040	MATSLSVRPNRTIISSDPAGSTRPNPIRRPPISAHLPKIPNSDSFRRRRLVFTSHRRKLNPAVQAGSRADDSAPFEMSVENALKLLGVTEGASFDDILRAKKSIISSCKDDPDTIAQVEAAYDMLLMQSLSQRRSGKVVDSSVRFADVKAANASGMGSMPKWLQTTVKSSPVAVEAPASKELGVQAGVYGALMVLTYVNGASTPLGVSYGADVPGLILATSFGATLYFMTKKNVKLGKASVITIGGLVAGAVVGSAVENWLQVDIVPLLGIHTPATVKGTLIITGLDSCSEVQLLATLQINAFRV	0.052	1.551	74	5.2459	1	2	1	0.194	2.1	5.2459	1	1	2.58	5.2459	1	1	NA	0	NA	NA	NA	0	NA	NA	NA	0	NA	NA	0	0	0	1	1	2	WTSP	Atlas only
Solyc01g111760	V-type ATP synthase beta chain IPR005723 ATPase, V1 complex, subunit B	AT4G38510	MEEGTLEVGMEYRTVSGVAGPLVILDKVKGPKYQEIVNIRLGDGTTRRGQVLEVDGEKAVVQVFEGTSGIDNKYTTVQFTGEVLKTPVSLDMLGRIFNGSGKPIDNGPPILPEAYRDISGSSINPSERTYPEEMIQTGISTVDVMNSIARGQKIPLFSAAGLPHNEIAAQICRQAGLVKRLEKSDNLLEGGEEDNFAIVFAAMGVNMETAQFFKRDFEENGSMERVTLFLNLANDPTIERIITPRIALTTAEYLAYECGKHVLVILTDMSSYADALREVSAAREEVPGRRGYPGYMYTDLATIYERAGRIEGRTGSITQIPILTMPNDDITHPTPDLTGYITEGQIYIDRQLHNRQIYPPINVLPSLSRLMKSAIGEGMTRRDHSDVSNQLYANYAIGK…	0	49.607	0	27.1399	11	36	1	2.162	20.44	17.119	6	7	37.11	26.9311	10	13	9.38	9.60334	4	4	15.21	11.8998	5	6	17.64	11.0647	5	6	1	1	1	1	1	5	WTSP	ITAG only
Solyc01g111990	Alanyl-tRNA synthetase (AHRD V1 **** Q9FFC7_ARATH); contains Interpro domain(s) IPR002318 Alanyl-tRNA synthetase, class IIc	AT5G22800	MTSLNFPKTGHGRDSILLFPTSCFQSKPFLPSSKGYRYSSGLIVRTQTLIYASSLSNGRTKIKGPREIQFVAKAQPVAVELVEGKLRDPQTSGDAIRQRFLDFYAARGHKVLPSASLVPDDPTVLLTIAGMLQFKPIFLGKVPREVPSAATSQKCIRTNDIENVGRTSRHQTFFEMLGNFSFGDYFKKEAIKWAWELSTSEYGLPADRLWISVYEDDDETFALWHDELGIPKERIKRLGEDDNFWTSGVTGPCGPCSELYYDFHPERGTSDVDLGDDTRFIEFYNLVFMQYNKKDDGSLEPLKQKNIDTGLGLERMARILQKVPNNYETDLIFPILEKAAELANVSYALAGDSTKTKLKIIGDHMRAVVYLISDGVNPSNIGRGYVVRRLIRRVVRTGR…	0	224.619	0	40.6282	37	159	37	7.778	160.76	33.6373	27	47	81.11	24.7214	22	27	88.18	23.4043	21	29	81.85	25.5319	21	28	74.81	22.2898	19	28	1	1	1	1	1	5	WTSP	Detected by both ITAG and Atlas
Solyc01g112060	NmrA family protein (AHRD V1 **-- B2J8Q2_NOSP7); contains Interpro domain(s) IPR016040 NAD(P)-binding domain	AT4G35250	MASTLYGHLATPTLPSRKLSSLSCPTMFHSALSFSIATTKAKHGSAPKVVCNAQSAPAALNLAPGTPVRPTSILVVGATGTLGRQVVRRALDEGYDVRCLVRPRPAPADFLRDWGATVVNADLSKPETIPATLVGVHTVIDCATGRPEEPIKTVDWEGKVALIQCAKAMGIQKFIFFSIHNCDKHPEVPLMEIKHCTEKFLRDSGLNHVVIRLCGFMQGLIGQYAVPILEEKSVWGTDAPTRIAYMDTQDIARLTFIALRNENINGKLLTFAGPRAWTTQEVITLCERLAGQDANVTTVPVSVLRFTRQLTRLFEWTNDVADRLAFSEVLTSDTVFSVPMAETYNLLGVDAKDVSSLEKYLQDYFTNILKKLKDLKAQSKQTDIFF	0	37.379	0	19.4301	9	49	9	1.994	27.26	19.4301	8	10	29.1	19.4301	9	11	19.68	16.0622	6	8	28.32	19.171	8	12	17.44	9.84456	5	8	1	1	1	1	1	5	WTSP	Detected by both ITAG and Atlas
Solyc01g112150	Sec1-1 syntaxin binding protein IPR001619 Sec1-like protein	AT2G17980	MALNLRQKQTECITRMLNLNQPVNAGATANEEVYKILIYDRFCQDILSPLIHVKDLRKHGVTLYFLIDKDRKPVHDVPALYFVQPTHLNVQRIVADASKSLYDSFHLNFSSSVPRPLLEDLASGTINSDSIERISKVHDQYLEFVTLEDNLFSLAYKNCYLQLNDPSAGDKEIEEIIEKIVSGLFCVLATLAVVPIIRCPRGGPAEMVASLLDQRLRDHLLAKNNLFSEAGNFTSSFQRPILCLFDRNFELSVAIQHDFRYRPLVHDVLGLRLNRLSVQGEKGGMKSFELDRSDPFWVANWSLVFPEVAMEIEAQLKKYKQDVEEVNKRTGGNPGAEFDGTDLVGNTKHLMNAVNSLPELTERKQVIDKHTNIATALLGEIKERSLDSYAKKENDMMVR…	0.002	3.634	3	3.06452	1	1	1	0.083	NA	0	NA	NA	4.53	3.06452	1	1	NA	0	NA	NA	NA	0	NA	NA	NA	0	NA	NA	0	0	0	1	0	1	1 PSM	ITAG only
Solyc01g112280	Succinyl-diaminopimelate desuccinylase IPR010159 N-acyl-L-amino-acid amidohydrolase	AT4G38220	MSKTGYYLDLRVFLVTLILIITTRTAAKDPSTILSRFQQYLQINTAQPHPNYYEAAEFIISQAKLLSLESQTLEFVKGKPLILLKWPGKDPTLPSILLNSHTDVVPSEHHKWTHPPFSAHLDSTTGNIFARGSQDMKCVGLQYLEAIRKLKSYGFRPLRTLYLSFLPDEEIGGNDGARKFVDSDVFAKMNVGIVLDEGLASPTDNYRAFYGERSPWWLVVKAVGAPGHGAKLYDNTAMENLLKSIEIIRRFRAAQFDLVKAGQKAEGEVISVNMVFLKAGTPSPSGFVMNLQPSEAQAGFDIRVPPTADQASLERLIADEWAPASRNMTFEFKQKVSVNDKLGRPAVTAVDSSNIWWALFEEAIIKANARLGKPEIFPASTDARYFRERGLPAIGFSPM…	0	10.457	0	9.375	4	6	4	0.65	2.18	1.78571	1	1	5.27	4.91071	2	2	NA	0	NA	NA	4.24	7.58929	3	3	NA	0	NA	NA	0	1	0	1	1	3	CIP	ITAG only
Solyc01g112290	Glutamyl-tRNA synthetase (AHRD V1 ***- Q52JJ5_NICBE); contains Interpro domain(s) IPR004527 Glutamyl-tRNA synthetase, class Ic, bacterial/mitochondrial	AT5G64050	MATVAAAPWFRARLIPELKSRQSLLYCRNGPRRYPQSLCFRRRSFSIYASAGDEGAVRVRFAPSPTGNLHVGGARTALFNYLYARSKGGKFVLRIEDTDLERSTRESEEAVLRDLSWLGLAWDEGPGIGGNYGPYRQSERNALYKEFAEKLLQSGHVYRCFCSNEELEKMKEMAKLKQLPPVYTGRWASATEQEVLEELTKGTPYTYRFRVPKEGSLKIDDLIRGEVSWNFDTLGDFVIMRSNGQPVYNFCVTVDDATMAISHVIRAEEHLPNTLRQALIYKALGFPMPHFAHVSLILAPDRSKLSKRHGATSVGQFRDMGYLPQAMVNYLALLGWGDGTENEFFSLEQLVEKFTIERVNKSGAIFDSTKLRWMNGQHLRSLPSEELNQIIGERWKDAD…	0	67.188	0	28.0702	13	47	13	3.047	22.96	17.5439	8	9	28.89	15.614	8	11	26.68	14.5614	7	9	27.03	12.4561	6	10	20.75	14.2105	7	8	1	1	1	1	1	5	WTSP	Detected by both ITAG and Atlas
Solyc02g005200	PsaB translation factor (Fragment) (AHRD V1 ***- A4S2E4_OSTLU); contains Interpro domain(s) IPR009472 Protein of unknown function DUF1092	AT3G08010	MACLSCSLPLLQTHKAISNFSVFPFKSVAICLPKCKVKSVHIPSVSEASSISSTNLEEEEDDDPTAELVYLDPEIDPESLSEWELDFCSRPILDIRGKKLWELLVCDDSLSLQYTKYFPNNLINSITLKDALLSISNDLGIPLPDKIRFFRSQMQTIITRACNELAIKPVPSKRCLSLVLWLEDRYETVYTRHPGFQKGAKPLLALDNPFPMELPENLYGEKWAFVQLPVSAVRKEVSNLETRLVFGSSLDLDLLGIEIEDNTLIPGLAVASSRAKPLAAWMNGLEVCSIEADVDKASLILSVGISTRYIYATYKKNPASTSEAEAWEAAKKACGGLHFLAIQNDLNSDDCVGFWLLLNLPPPPV	0	19.313	0	14.7945	4	13	4	0.848	5.13	3.28767	1	2	12.68	12.3288	3	4	8.81	6.84932	2	3	3.5	4.38356	1	1	6.93	10.411	3	3	1	1	1	1	1	5	WTSP	Detected by both ITAG and Atlas
Solyc02g005280	Pentatricopeptide repeat-containing protein IPR002885 Pentatricopeptide repeat	AT1G50270	MAGLNEELKSLFLLKGWKLYHLKQMNCVLFTCGLSHHTFFFSKLLRLCLLLPSFPSSYASSLFNHITRPAIHTWNIMFKGFSNNTSHPQNSSISLYIQMRQHGVFPNKHTFPLLLRAKNENPHLIFPQILKFGYISDQFVQNSLVSCFASSGYVDLARQVFDDITHKDVLSYTALIDGYARNALPVRALKLFLEMRQAQVKVDEVAVVAALSPAGTLRCVWFGKCLHAFYIEPGRVSRDVYIGSALVDMYSKCGFWDDAMKVFEDMPYKNLISWTAMIAGSLHCNRCREALSVFEEMLSRKVVPNQVTLTSVLSASTKLGALEQGRWIANYIKAHNVKFNTALATALIDMYAKCGCIEEALLVFDNLPNKDVYLWTAMIHGLATHGDAAKSMTFFLEML…	0.046	1.435	115	2.80992	1	1	1	0	0	2.80992	1	1	NA	0	NA	NA	NA	0	NA	NA	NA	0	NA	NA	NA	0	NA	NA	0	0	0	0	1	1	1 PSM	ITAG only
Solyc02g005350	Succinyl-CoA ligase (AHRD V1 ***- B9RL91_RICCO); contains Interpro domain(s) IPR005810 Succinyl-CoA ligase, alpha subunit	AT5G23250	MARQATRLISNLSTKLNPSSPTMSASPLWHQYRYFGSPPPPPAVFVDKNTRVICQGITGKNGTFHTEQAIEYGTKMVGGVTPKKGGTEHLGLPVFNTVVEAKVETKANASVVYVPPPFAAAAIMEAMEAELDLVVCITEGIPQHDMVRVKAALKKQLRTRLIGPNCPGIIKPGECKIGIMPGYIHKPGRIGIVSRSGTLTYEAVFQTTAVGLGQSTCVGIGGDPFNGTNFVDCLERFIADPQTEGIVLIGEIGGTAEEDAAALIKESGTQKPVVAFIAGLTAPPGRRMGHAGAIVSGGKGTAQDKIKALKEAGVTVCESPAKIGVTMLDVFKQRGLA	0	20.503	0	11.276	3	15	1	1.424	6.96	3.85757	1	2	20.31	11.276	3	6	2.95	3.85757	1	2	13.6	6.82493	2	5	NA	0	NA	NA	0	1	1	1	1	4	CIP	Detected by both ITAG and Atlas
Solyc02g014150	Photosystem II stability/assembly factor Ycf48-like protein (AHRD V1 **-- B0C6T3_ACAM1); contains Interpro domain(s) IPR016705 Photosystem II stability/assembly factor, HCF136	AT5G23120	MALAHSIFTPLKPLTTTPRPLLPHNFPPRLPLCRSANINRRQLIADTAAAIILPPLLGVGVSLSPLPVAKAEDTPLSEWERVFLPIDPGVVLLDIAFVPDDPNHGFVLGTRQTILETKDGGTTWVPRSIASAEEEDFNYRFNSISFKGKEGWIIGKPAILLHTSDAGENWERIPLSSQLPGDMVYIKATGEQSAEMVTDEGAIYITSNKGYNWKAAIQETVSATLNRTVSSGISGASYYTGTFSTVNRSPDGRYVAVSSRGNFYLTWEPGQAYWQPHNRAVARRIQSMGWRADGGLWLLVRGGGLYLSKGTGLTEDFEEVSVQSRGFGILDVGYRSQDEAWAAGGSGILLKTTNGGKTWIRDKAADNIAANLYSIYQ	0	93.213	0	33.1565	12	223	12	12.111	129.29	28.6472	9	39	146.43	31.0345	11	49	139.32	28.6472	10	43	143.62	29.1777	10	45	151.25	28.6472	9	47	1	1	1	1	1	5	WTSP	Detected by both ITAG and Atlas
Solyc02g014310	Polyadenylate-binding protein IPR012677 Nucleotide-binding, alpha-beta plait	AT1G48920	MGKSIKKSATKADAAVVAPTKSMKKGKREAEDEIAKLVSAKKQKKDVAVAQAVEKKKSDLKTQKKKKPVSSSSDDSSSESESEDDKPLVPPKKVAPAKKGKVASSSDDSDSSDEDEAPAKKVVVASTKNGVAAKKKDESSDDSDDSSSEEDVPAPKKPPTNGAKKDKSSDDSDDSSSEDDAVVKKAPAVVKKAPAAASKKQESSSDSSDDSSSDDDDEPPSKVVAQPKKAPQAVKKTGDSSDDSDDSESDSDSDKGKAATVAKKTAAVSKKVASSDDDSEDDSSEESDEEPQKKKSKPSTTPAVSKAPEKSSSEESSDSDDSSEDEEDDKPSKTPKKGADVEMVDAPSAKAQQTPITPKAQTPGGSKTLFVGNLSYSVEQADVENFFKDAGEVQEVRFA…	0	10.696	0	7.44849	4	4	4	0.283	NA	0	NA	NA	4.1	3.01109	2	2	NA	0	NA	NA	5.95	4.4374	2	2	NA	0	NA	NA	0	1	0	1	0	2	Sporadic	ITAG only
Solyc02g020940	Glyceraldehyde-3-phosphate dehydrogenase (AHRD V1 **** D7UNZ5_BRARC); contains Interpro domain(s) IPR000173 Glyceraldehyde 3-phosphate dehydrogenase	AT1G12900	MASAALSVANSSVHVSKNKGSFSEFTGLRTSSAVPFGVGWKTNVDLLSLVAYQTSVISGAGKNNNNNSRVVEAKLKVAINGFGRIGRNFLRCWHGRKDSPLDVIAINDSGGVKQASHLLKYDSTLGIFDADVKPVGTDGISVDGKIIKVVSDRNPINLPWKDLGVDLVIEGTGVFVDREGAGKHIQAGAKKVLITAPGKGDIPTYVVGVNADLYSPDESIISNASCTTNCLAPFVKVLDQKFGIIKGTMTTTHSYTGDQRLLDASHRDLRRARAAALNIVPTSTGAAKAVALVLPSLKGKLNGIALRVPTPNVSVVDLVVQVSKKTFAEEVNAAFRESADNELAGILSVCDEPLVSVDFRCSDVSSTVDASLTMVMGDDMVKVIAWYDNEWGYSQRVVD…	0	145.08	0	48.1663	21	371	7	49.119	234.67	44.7433	19	83	139.37	40.5868	17	53	246.53	42.0538	18	88	237.48	43.7653	19	83	182.51	36.6748	17	64	1	1	1	1	1	5	WTSP	Detected by both ITAG and Atlas
Solyc02g021140	Superoxide dismutase (AHRD V1 ***- B9S4J6_RICCO); contains Interpro domain(s) IPR001189 Manganese/iron superoxide dismutase	AT5G23310	MSWCCCNRLSTSTSSDLWRQFNIPNVGLRQKKRSVSAYYGLKTPPYKLDALEPYMSQRMVEIHWGEHHRGYVESLNKQIENNDIFYGCTMEQLIKLTYNNGNPLPEFSDAAQVWNHDFFWESMQPGGGDMPKLGFLHQIDKDFGSFTNFKDKFIEAALTLFGSGWIWLVLSREEKRLAIIKTSNAVNPLVWNDIPLIGLDLWEHAYYLDYKNDKAKYVNVFMNHLVSWDAALGRMARAQAFVNLGEPKIPVA	0	13.959	0	8.73016	2	10	2	1.512	2.68	4.36508	1	2	8.53	8.73016	2	4	1.63	8.73016	2	3	2.49	4.36508	1	1	NA	0	NA	NA	0	1	1	1	1	4	WTSP	Detected by both ITAG and Atlas
Solyc02g021420	Gelsolin IPR007122 Gelsolin	AT3G57410	MSVSMRDLDPAFQGAGQKAGIEIWRIEKLSPVPVPKSSHGKFYTGDSYIILKTSASKTGALRHDIHYWLGADTSQDEAGASAIKTIELDAALGGRAVQYREVQGHETEKFLSYFKPCIIPLKGGIASGFKHVEEEEYKNCLYICQGKHVVHVKEVPFARSSLNHDDIFILDTKSKIFQFNGSNSSIQERAKALEVVQYIKDTYHDGNCDVAAIEDGKLMADAETGEFWGFFGGFAPLPRKTTRDEAKNIDTVPTRLYRVQKGQAEPVEIESLTRELLDTNGCYIVDCGIEVFVWMGRNTSLDERKTASGAADELLLGLDRPKCHVVRVIEGFETVMFRSKFDSWPQSTNVAVTEDGRGKVAALLKRQGLNVRGLMKAAPPKEEPQPYIDCTGNLQVWRV…	0.004	2.192	10	1.33607	1	1	1	0.041	NA	0	NA	NA	2	1.33607	1	1	NA	0	NA	NA	NA	0	NA	NA	NA	0	NA	NA	0	0	0	1	0	1	1 PSM	ITAG only
Solyc02g023970	GTP-binding protein IPR004396 Conserved hypothetical protein CHP00092	AT1G30580	MPPKAAKGKEVPAERPILGRFSSHLKIGIVGLPNVGKSTLFNTLTKLSIPAENFPFCTIEPNEARVHVPDERFEWLCQLYKPKSEVAAFLEIHDIAGLVRGAHAGQGLGNSFLSHIRAVDGIFHVLRAFEDPDIIHVDDTVDPVRDLEVISEELRLKDIEFMERRIEDLDKSMKRSNDKQLKIEHELCLRVKASLQEGKDVRLGDWKAADVEFLNTFQLLTAKPIVYLVNMNEKDYQRKKNKFLPKIHAWVQEHGGEIIIPFSAAVERNLADMPPDEAAKYCEENKLQSCLPKIIKTGFAAINLIYFFTAGPDEVKCWQIRRLMKAPQAAGTIHTDFERGFICAEVMKFEDLKELGSESAVKAAGKYKQEGKTYVVQDGDIIFFKFNVSGGGKK	0.026	1.666	64	2.53807	1	1	1	0	NA	0	NA	NA	NA	0	NA	NA	NA	0	NA	NA	0	2.53807	1	1	NA	0	NA	NA	0	1	0	0	0	1	1 PSM	ITAG only
Solyc02g023990	Short-chain dehydrogenase/reductase SDR (AHRD V1 **-- A1WVI4_HALHL); contains Interpro domain(s) IPR002347 Glucose/ribitol dehydrogenase	AT4G20760	MHFSVAYGKECVSDLGFSNQKMKLNFVTQRVKRLYLRRGYTFSTLASAVRWEGGVSMVQGASRGIGLEFVRQLLEKKDKGYVVATCRNPSGAAGLLELKNKFPERLDIHPLDLTVESTIEDSVKSIGDKYGSVNLLINASGVLSTPNVLQPETTLSKVQRSSLLLAYDINAVGPILVIKHMWPLLKSGGGSGTDKDFAIVANLSARVGSIGDNALGGWHSYRASKTALNQLTKNVSVEFARRKDPIICILLHPGTVDTDLSQPFQKNIPKEKLFTKEFSVQKLLSIMNNTKRCDNGKFFAWDGQEIPW	0	10.674	0	9.09091	2	4	2	0.292	5.8	9.09091	2	2	NA	0	NA	NA	NA	0	NA	NA	NA	0	NA	NA	5.49	9.09091	2	2	1	0	0	0	1	2	Sporadic	Detected by both ITAG and Atlas
Solyc02g024050	Ferredoxin--NADP reductase (AHRD V1 ***- B9SB31_RICCO); contains Interpro domain(s) IPR012146 Ferredoxin--NADP reductase	AT1G30510	MAHSAISQVSVAVPLQTDSSFRRSTFKATSLTFSDKSCISMPSIDLKATRSRSQYIVCMSVQHASKAKVSVSPLSLENATEPPLNIYKPKEPYTATIVSVERIVGPKAPGETCHIVIDHDGNLPYWEGQSYGVVPPGENPKKPGSPHNVRLYSIASTRYGDSFDGKTASLCVRRAVYYDPETGKEDPSKNGVCSNFLCNAKPGDKVKITGPSGKIMLLPENNPNATHIMIGTGTGVAPFRGYLRRMFMESVPMKFNGLAWLFLGVANTDSLLYDDEFTKYLNDYPGNFRYDRALSREQKNNKGGKMYVQDKIEEYSDEIFKLLDEGAHIYFCGLKGMMPGIQDTLKRVAEERGESWEQKLSQLKKNKQWHVEVY	0	45.589	0	23.5294	9	31	9	3.281	21.56	17.9144	6	8	22.02	18.7166	6	8	11.4	9.09091	3	4	14.69	12.2995	4	5	15.66	12.8342	4	6	1	1	1	1	1	5	WTSP	Detected by both ITAG and Atlas
Solyc02g027080	Cc-nbs-lrr, resistance protein	AT1G61190	MAYASLISLKTTIKSLLMTSNLPMQSLICDHKEELWALHEKVSSLGLFVNNFEKNNVSGEMTDLEVQVKEVASAVEYTIQLRLTEIEMANTKNNVSGEIEGLHFHHSLQQVAVDIDRVRKESTKIRDKGKQASEESSVRDFSSSANDILNVKNIMVGRGDQRERLLEDLTRGYSGEPKVIPIIGMGGIGKTTLAIEVYNDAHVRSHFDVCAWATLSQQHNVKEILLNLLRSTKGGAFDMLDEAELADMLRKSLYGKRYLIVMDDIWSIKAWDDVRRFFPSQNKGSRILLTTRNNEVACYANTENLSLQMSFMDQDESWNLFKSVAFANEALPLPSEFENIGKKIAEKSHGLPLTIVVVAGLLKSKKTIEDWETVAKDVKSFVNNDPDEQCSHVLGLSYN…	0.019	1.771	44	1.29171	1	3	1	0.056	2.14	1.29171	1	1	NA	0	NA	NA	2.55	1.29171	1	1	NA	0	NA	NA	2.46	1.29171	1	1	1	0	1	0	1	3	1 Peptide	ITAG only
Solyc02g032860	Phosphoadenosine phosphosulfate reductase (AHRD V1 *-** A6EX37_9ALTE); contains Interpro domain(s) IPR004508 Thioredoxin-independent 5'-adenylylsulphate reductase	AT1G62180	MALAFTSSTAIHGSISSSSHQHPKVGNIQLLDQPKKSLNFTQRRCAVKPLYAEPKRNESIVPSAATFVAPEVAEKLIEAEDFEKLAKDLENASPLEIMDNALEKFGDDIAIAFSGAEDVALIEYAHLTGRPFRVFSLDTGRLNPETYQLFDAVEKHYGIRIEYMFPDAVEVQALVRTKGLFSFYEDGHQECCRVRKVRPLRRALKGLRAWITGQRKDQSPGTRSEVPVVQVDPSFEGLDGGSGSLVKWNPVANVEGKDIWNFLRAMNVPVNSLHLKGYVSIGCEPCTRPVLPGQHEREGRWWWEDAKAKECGLHKGNIKAESVNGNGNNATQTNDTVADIFDTKGIVTLSRPGVENLLKLEDGREPWLVVLYAPWCQFCQAMEGSYVELAEKLGGSGVK…	0	4.902	0	3.72807	1	2	1	0.11	6.24	3.72807	1	2	NA	0	NA	NA	NA	0	NA	NA	NA	0	NA	NA	NA	0	NA	NA	0	0	0	0	1	1	WTSP	Detected by both ITAG and Atlas
Solyc02g049070	Genomic DNA chromosome 5 P1 clone MAH20 (AHRD V1 **-- Q9FNN4_ARATH)	AT5G08540	MAASACTVLNFSHPHVASTSQYIPTLSTPINRTLSFPRHRSNTFVVTVGFSTRAAKSDSGANVSSDKKKEVLEDEEEEEMPWIQEKALDLVEFTGSVTQAIPGPRIGSSSFPWILTVPLTYFGITFVIAFVKTARKFNSPREKRKKLVNKNAELCKSIDELFEKGKDFVEPSTLKGLAQKTGFDMEEIFRKYIRYSLNEKPFSPDLVAYLIQLRKASMLTDSEVAGILNEISRRIVQDKGPVVMDISGYSEKGLKRKLAVQTLFGKIYYLSELPEFCSRDSSLTVKEIFGVADEDAEKLRLHTIPEAGNMDSLERMVNGSDSE	0	7.477	0	4.33437	2	4	2	0.334	3.17	4.33437	1	1	5.15	4.33437	2	2	NA	0	NA	NA	NA	0	NA	NA	3.21	3.71517	1	1	1	0	0	1	1	3	WTSP	Detected by both ITAG and Atlas
Solyc02g055440	Genomic DNA chromosome 3 P1 clone MPN9 (AHRD V1 ***- Q9LT28_ARATH)	AT3G19800	MASRGGGWISSRSCINTSIPQRDSSTRISKGNHLSLITKKSKKPLVRISSSDGKWHGEWNSDYIFTLKDLQLEDLAEERDTPISIQLSIHKHAGFGLSVDGTIITSFTTKCSNCYSPYCREVHTSFKVWVLPSTRDNKGCAHQLPLLGWDDPSVIYVKPGFEADLDSLIQDTVRLATSVKETCSESCEKSVPKLQPLGKQNAASIDRRWSRLLELKKET	0.002	4.238	3	5.02283	1	4	1	0.166	2.31	5.02283	1	1	NA	0	NA	NA	2.47	5.02283	1	1	2.39	5.02283	1	1	2.68	5.02283	1	1	1	1	1	0	1	4	WTSP	Detected by both ITAG and Atlas
Solyc02g062130	Ferredoxin--NADP reductase (AHRD V1 ***- D7MN04_ARALY); contains Interpro domain(s) IPR012146 Ferredoxin--NADP reductase	AT1G20020	MAAALSASVSLQSSNSTSLSIKTIFISPENITFNKVLLCNRNVSVSRKVFHIRAQLTTEIPAKVAKVSKKQDEGVVVNKFRPKDPYIGRCLLNTKITGDDAPGETWHMVFSTEGEIPYREGQSIGVIPDGVDSNGKPHKLRLYSIASSALGDFGDSKTVSLCVKRLVYTNDKGEIVKGVCSNFLCDLKPGAEVKITGPVGKEMLMPKDPNATVIMLATGTGIAPFRGFLWKMFFEKHEDYKFNGLAWLFLGVPTSSSLLYKEEFEKMKEKAPENFRLDFAVSREQINEKGEKMYIQTRMAEYAEELWTLLKKDSTFVYMCGLKGMEQGIDDIMTSLAERDGINWANYKKQLKKAEQWNVEVY	0	86.135	0	32.3204	12	217	3	7.185	140.54	22.3757	7	55	160.64	26.2431	9	58	108.61	18.232	6	33	120.01	19.8895	7	39	105.33	17.6796	6	32	0	0	0	1	1	2	WTSP	Detected by both ITAG and Atlas
Solyc02g062240	Small nuclear ribonucleoprotein Sm D3 IPR006649 Like-Sm ribonucleoprotein, eukaryotic and archaea-type, core	AT1G76300	MSRSLGIPVKLLHEATGHIVTVEMKSGELYRGSMVECEDNWNCQLETITYTAKDGRVSQLEHVFIRGSKVRFMIIPDMLKNAPMFKRLEARIKGKGSSLGVGRGRAMAMRAKAQAAGRGAAPGRGAVPPVRR	0	7.913	0	11.3636	1	3	0	0.259	NA	0	NA	NA	4.57	11.3636	1	1	NA	0	NA	NA	6.5	11.3636	1	2	NA	0	NA	NA	0	1	0	1	0	2	1 Peptide	ITAG only
Solyc02g062270	Unknown Protein (AHRD V1)	no hits	MRTRSAEKRSAGINQTPPAESKRTPTSRAKQTRNVGSKSSPAAEEAKASDADGAVQSTPVAKSASGRKTTRRAVKKAVKKSPASSKTTSDNTLVSEDAGTAMLEDPVEEKDAKDSKEDHGNEKDAAGSTECVEEGDTEDPKEDYVTEEARTQRKLTSRRKMPRTQRKILSRRKIYRIPRKTLQSRKVQRTLRKILSRRKLRRTQKKML	0	9.338	0	13.4615	2	2	2	0.931	NA	0	NA	NA	6.15	13.4615	2	2	NA	0	NA	NA	NA	0	NA	NA	NA	0	NA	NA	0	0	0	1	0	1	Sporadic	Detected by both ITAG and Atlas
Solyc02g062340	Fructose-bisphosphate aldolase (AHRD V1 ***- Q9SXX4_NICPA); contains Interpro domain(s) IPR000741 Fructose-bisphosphate aldolase, class-I	AT4G38970	MASASLLKTSPVINKTDFIKGQALRQPSVSVNVVRSHPSGLTVRASSYADELVKTAKTVASPGRGILAMDESNATCGKRLDSIGLENTEANRQAYRTLLVSAPGLGNYISGAILFEETLYQSTVDGKKIVDVLLEQNIVPGIKVDKGLVPLAGSNNESWCQGLDGLASRSAAYYQQGARFAKWRTVVSIPNGPSALAVKEAAWGLARYAAISQDNGLVPIVEPEILLDGEHNIDRTFEVAQQVWAEVFFYLAENNVMFEGILLKPSMVTPGAECKERATPEQVADYTLKLLQRRIPPAVPGIMFLSGGQSEVEATLNLNAMNQSPNPWHVSFSYARALQNTCLKTWGGRPENVEAAQKALLTRASANSLAQLGKYTGEGESEEAKEGMFVKGYVY	0	114.586	0	36.7089	15	356	6	17.957	244.48	34.1772	14	97	196.88	34.9367	14	81	174.67	28.8608	12	63	189.92	28.8608	12	64	137.72	28.8608	12	51	1	1	1	1	1	5	WTSP	Detected by both ITAG and Atlas
Solyc02g062610	Hydrolase alpha/beta fold family protein (AHRD V1 ***- D7MBG9_ARALY); contains Interpro domain(s) IPR000073 Alpha/beta hydrolase fold-1	AT4G36530	MSTSCATVGTEWLNPVGTRLALPGRNNHFRGKCELSRRGFTFNGIVAAGASVMTTSVVAEPSKGLERLPFKPEGYNYWTWRGHKIHYVVEGEGFPVVLIHGFGASAFHWRYNIPELAKKYKVYALDLIGFGWSEKALIDYDAFIWKDQVVDFLKEIVKEPSVLVGNSLGGFTALIAAASLTDEVKGVTLLNSAGQFGDASSAAEGTEETALQKFILKPLKEIFQRVVLGLVFWQSKQPARIESVLKSVYINSSNVDDYLIDSITRPAADPNAGEVYYRLMTRFISNQRKYTLNSVLRQLSCPLLLLWGDLDPWVGPAKANQIKEFYPNTTIVNLKAGHCPHDEVPELVNEALLDWLSATITPASSLETVSET	0	7.99	0	8.87097	3	4	2	0.778	NA	0	NA	NA	6.63	8.87097	3	3	2.19	3.76344	1	1	NA	0	NA	NA	NA	0	NA	NA	0	0	1	1	0	2	WTSP	Detected by both ITAG and Atlas
Solyc02g062970	Xaa-Pro aminopeptidase 2 (AHRD V1 ***- Q93X45_SOLLC); contains Interpro domain(s) IPR001131 Peptidase M24B, X-Pro dipeptidase/aminopeptidase P, conserved site IPR000994 Peptidase M24, structural domain	AT4G36760	MADTLAALRSLMASHSPPLNALIVPSEDYHQSEYVSARDKRRDFVSGFTGSAGIALISMNEALLWTDGRYFLQAAQQLSEQWKLMRMGEDPALDIWMADNLPKDAAIGVDPWCISVDTAQKWERAFAKKQQKLVPTARNLVDEVWKNQPPAETNPLIVHPLEFAGRSVADKLKDLRAKLVKEKARAIIITALDEVAWLYNVRGTDVSYSPVVHAFAIVTLTSAFLYVDKRKLSSEANSYMKENGIFVREYGDVSSDAVLLASDQLTPSSADKTPSGLNTETNCGKDTENGEIQTAELVNDLIWVDTGACCFALYLKLNADKVLLKQSPLALAKALKNPVEMKGLKNAHIRDGAAVVQYLAWLDRQMQEIYGASGYFAEAESMSMNKLKDLKRLTEVSAS…	0.059	1.481	85	1.22324	1	1	1	0.105	NA	0	NA	NA	NA	0	NA	NA	0	1.22324	1	1	NA	0	NA	NA	NA	0	NA	NA	0	0	1	0	0	1	1 PSM	Detected by both ITAG and Atlas
Solyc02g063070	14-3-3 protein beta_alpha-1 IPR000308 14-3-3 protein	AT5G16050	MADSSREENVYLAKLAEQAERYEEMIEFMEKVAKTADVEELTVEERNLLSVAYKNVIGARRASWRIISSIEQKEESRGNEDHVNTIKEYRSKIEAELSKICDGILSLLESNLIPSASTAESKVFYLKMKGDYHRYLAEFKTGTERKEAAENTLLAYKSAQDIALAELAPTHPIRLGLALNFSVFYYEILNSPDRACNLAKQAFDEAISELDTLGEESYKDSTLIMQLLRDNLTLWTSDNADDVGDDIKEASKPESGEGQQ	0	27.186	0	19.6154	4	16	1	1.371	5.8	8.46154	2	2	16.26	15	3	5	7.98	15	3	3	11.68	15	3	4	5.57	10.3846	2	2	1	1	1	1	0	4	WTSP	ITAG only
Solyc02g063150	Ribulose bisphosphate carboxylase small chain (AHRD V1 ***- Q84QE5_TOBAC); contains Interpro domain(s) IPR000894 Ribulose bisphosphate carboxylase, small chain	AT5G38420	MASSIVSSAAAATRSNVAQASMVAPFTGLKSAASFPVTKKNNNVDITSLASNGGRVRCMQVWPPINMKKYETLSYLPDLSDEQLLSEIEYLLKNGWVPCLEFETERGFVYRENNSSPGYYDGRYWTMWKLPMFGCTDATQVLAEVQEAKKAYPQAWVRIIGFDNVRQVQCISFIAYKPEGF	0	29.871	0	22.0994	7	200	2	9	118.2	22.0994	6	90	35.98	19.337	5	30	47.16	19.337	5	30	40.15	16.0221	4	20	49.2	19.337	6	30	1	1	1	1	1	5	WTSP	Detected by both ITAG and Atlas
Solyc02g063300	Unknown Protein (AHRD V1)	AT5G38060	MFMAMSTQLCPNHVIPYANSSTSHLNRTTISIIDLGKRRLTRLSVQCSEKQTQNLRTCKNCKAQFNPLLNHPRACRYHTAHFGGETRRKFESVYSGGTMDTPDGGKVFQYWHCCGSEDPFDVGCTAAPHASYDD	0	28.885	0	29.8507	4	19	4	9	19.97	29.8507	4	6	14.73	21.6418	2	5	13.88	21.6418	2	4	9.96	21.6418	2	3	4.77	13.4328	1	1	1	1	1	1	1	5	WTSP	Detected by both ITAG and Atlas
Solyc02g063490	Malate dehydrogenase (AHRD V1 **** B9S7S1_RICCO); contains Interpro domain(s) IPR010097 Malate dehydrogenase, NAD-dependent, eukaryotes and gamma proteobacteria	AT5G09660	MQRSAERIATISAHLNPSPSSHQMEGLSAANCRAKGGSPGFKVAILGAAGGIGQPLAMLMKMNPLVSVLHLYDVANTPGVTADISHMDTGAVVRGFLGPQQLEDALTGMDLVIIPAGVPRKPGMTRDDLFNINAGIVKTLCEGIAKCCPKAIVNIISNPVNSTVPIAAEVFKMAGTFDPRRLLGVTMLDVVRANTFVAEVLGLDPREVDVPVVGGHAGVTILPLLSQIKPPCSFTPAETEHLTSRIQNGGTEVVEAKAGAGSATLSMAYAAVKFADACLHGLRGDAAIIQCAFVSSQVTELPFFASKVRLGRSGVEEIFPLGPLNEYERTGLEKAKKELATSIQKGVGFVKK	0	49.934	0	17.3295	4	47	3	3.394	40.67	13.9205	3	10	38.67	17.3295	4	10	37.25	17.3295	4	9	47.01	17.3295	4	12	25.21	9.94318	2	6	1	1	1	1	1	5	CIP	Detected by both ITAG and Atlas
Solyc02g064550	C1orf93 homolog (AHRD V1 **-- C1C416_RANCA); contains Interpro domain(s) IPR012335 Thioredoxin fold	AT5G65840	MESLQQSSLTFATKFPSFCSFSPTPNTFKFLHPFPSSAIPLTATTPKRISSFVPKAAASTAAFAQDIGDVLADVSIFTATGQSVKFEDLWDQNEGVAVVALLRHFGCPCCWELAKALKETKERFDSAGVKLIAVGIGAPNKARILAERLPFPLDCLYADPDRKAYDVLGLYYGVGRTFFNPASAKVLSRFNELREATKNYTIEATPDDRSGVLQQGGMFLFKGKQLLYAWKDEGTGDHAPMEDIFDICCKVPVA	0	19.324	0	22.4409	5	20	5	1.424	13.1	12.9921	3	5	11.81	14.5669	3	4	11.14	18.8976	4	4	10.52	18.1102	4	5	5.92	9.44882	2	2	1	1	1	1	1	5	WTSP	Detected by both ITAG and Atlas
Solyc02g064670	Ribosomal protein L26-like 1 (AHRD V1 ***- B7TJ03_PIG); contains Interpro domain(s) IPR005756 Ribosomal protein L26, eukaryotic/archaeal	AT3G49910	MKYNPRVSSSRRKSRKAHFTAPSSARRILMSAPLSSELRVKYNVRSMPVRKDDEVQVVRGTYKGRDGKVVQVYRKKWVIHIERITREKVNGSTVNVGIHPSKVVVTKLRLDKDRRSLLDRKAKGRAAADKDKGTKFTSEDIMQKID	0.027	1.934	37	4.79452	1	1	0	0.389	2.05	4.79452	1	1	NA	0	NA	NA	NA	0	NA	NA	NA	0	NA	NA	NA	0	NA	NA	0	0	0	0	1	1	1 PSM	Detected by both ITAG and Atlas
Solyc02g064950	CBS domain-containing protein-like (AHRD V1 ***- B8AP73_ORYSI); contains Interpro domain(s) IPR000644 Cystathionine beta-synthase, core	AT4G36910	MASISPSGVSLHRSSAAFHHQLPCLLLSLPCHKVATFAKCFLSVRLWNSRNHFSVTASNTLTANSVEPRNGVYTVGDFMTRKDDLHVVKPSTSVDEALETLVERRITGFPVVDDDWKLVGLVSDYDLLALDSVSGTGGADANMFPEVGSNWKTFNEVQKLISKTKGKVVGDLMTPAPLVVRESTNLEDAARLLLKTKYRRLPVVDSDGKLVGIITRGNVVRAALHIKRIMEMEGQQ	0	17.909	0	15.2542	3	10	1	1.154	6.15	10.1695	2	2	8.83	15.2542	3	3	6.07	9.32203	2	2	3.04	4.23729	1	1	6.18	10.1695	2	2	1	1	1	1	1	5	WTSP	Detected by both ITAG and Atlas
Solyc02g065280	Methyl jasmonate esterase IPR000073 Alpha_beta hydrolase fold-1	AT2G23610	MEPIKKQGRHFVLVHGACHGGWCWYKLKPLLEVAGHKVTTLDLAASGIDLRKIEQLHTFHDYTLPLMELMESLPQEEKVILVGHSLGGMNLGLVMEKYPQKIYVAVFLAAFMPDSIHSSSYVLDQYFERMQTMNWLDTQFVSYGSHEEPLPSIFFGPKFLAYNLYQLCPPEDVALVSSLGRASSLFLEDLSKSKYLTDEGYGSVKKVYIVCTDDKLLPKEFQKWQIDNINSIIETKEIEGADHMAMLSMPKKLCDTLLEIADKYN	0.004	2.571	9	4.15094	1	1	1	0.259	NA	0	NA	NA	2.38	4.15094	1	1	NA	0	NA	NA	NA	0	NA	NA	NA	0	NA	NA	0	0	0	1	0	1	1 PSM	ITAG only
Solyc02g065400	Oxygen-evolving enhancer protein 1 of photosystem II (AHRD V1 ***- A8J0E4_CHLRE); contains Interpro domain(s) IPR002628 Photosystem II manganese-stabilizing protein PsbO	AT3G50820	MAASLQAAATLMQPTKVGVRNNLQLRSAQSVSKAFGVEQGSGRLTCSLQTEIKELAQKCTDAAKIAGFALATSALVVSGANAEGVPKRLTYDEIQSKTYMEVKGTGTANQCPTIEGGVGSFAFKPGKYTAKKFCLEPTSFTVKAEGVSKNSAPDFQKTKLMTRLTYTLDEIEGPFEVSPDGTVKFEEKDGIDYAAVTVQLPGGERVPFLFTIKQLVASGKPESFSGEFLVPSYRGSSFLDPKGRGGSTGYDNAVALPAGGRGDEEELQKENVKNTASLTGKITLSVTQSKPETGEVIGVFESIQPSDTDLGAKVPKDVKIQGIWYAQLE	0	84.07	0	34.0426	15	300	3	15.681	140.34	34.0426	14	54	162.01	32.2188	13	67	144.04	32.2188	14	56	163.09	30.3951	13	67	143.25	32.2188	14	56	1	1	1	1	1	5	WTSP	Detected by both ITAG and Atlas
Solyc02g065470	Pathogenesis-related protein (AHRD V1 ***- B3TLW3_ELAGV); contains Interpro domain(s) IPR001283 Allergen V5/Tpx-1 related	AT5G66590	MTNLFFLQFLLLATASTLTHISGQTVPPPPPTSAATPPSRAAQEFLDVHNKARSEVGVGPLTWSPMLAKETSLLVRYQRDKQNCSFANLSNGKYGGNQLWASGTVVTPRMAVDSWVAEKKFYSYENNSCTGDDKCGVYTQVIWKKSIELGCAQATCSKGAATLTVCFYNPPGNVIGEKPY	0	8.691	0	15.5556	3	4	2	1.154	NA	0	NA	NA	7.17	15.5556	3	3	NA	0	NA	NA	2.26	6.11111	1	1	NA	0	NA	NA	0	1	0	1	0	2	CIP	Detected by both ITAG and Atlas
Solyc02g065510	Pentatricopeptide repeat-containing protein IPR002885 Pentatricopeptide repeat	AT5G66631	MYLNRFHKINSTFYYVSLHIRRFLVTQNVNKVALYFHRARLIDSIRLALRSNSSDNLVTYLENPSLDSFVVTKALQSAPSPESALHLIECLKKIPHFSHTHNTLYALAKILAKARETAKLQALINAINSGKFINAARVSYMDQMRWYAISREFNDVVRVWDEWRTTLQKHPCTESYNIVMGLYVQVGKDSDAVRLFRRMIEEGALPNCRTYTIMIEHLVKTRNLDSAIELFHMLPHVRIKRTLKQYSVLVEAFTIANQLDVVKVLLDQMRSDGILPVRAMLWSLQQMQSAGYDAETNELLRDMLPDGRIKMIGYSKDSSEDDSDDEDEEIDGNNTNAVDQPHLKPWLDPASLANALQNWGAEEVTALEDANLVWTTRLVCKMIRSFKSAETAWQFFYWV…	0.043	1.465	106	1.07198	1	2	1	0.075	3.28	1.07198	1	2	NA	0	NA	NA	NA	0	NA	NA	NA	0	NA	NA	NA	0	NA	NA	0	0	0	0	1	1	1 Peptide	ITAG only
Solyc02g065630	Myosin-like protein	AT1G67170	MGSKGRGPPPNIRRPPPGPGMMYPDSFGPPTHNPPPVDFPPFDRLPPPEILEQKIGAQHLEMQKLTTENQRLAATHVTLRRDLAAAQHELQMLHVQIETVKANREQETKGLSDKISRIEAELQAAESIKKELPQAQGEARTLFAARQELVTKIQMLTQDLQRAHADVLHIPRLLAELESLKKEYQQCRTTYECERKLYSDHLESLQVMEKNYMTMSREVEKLRAELANTSNSDRQTGGPYGGSTGYNENDATNNYATGQNIYADGYGVYQGRGSVPTGTNAGGVPAVDSPQVGAQSVPPSNRPPYDTSNMSGYDAQRGIRGPVGHGYEAQMGSSGPGYDAQRGSGLAAYEAQRGHGYDRGPGYDAQRAAGYEAYRGPGYDAYGAPVYDPSKASNYDASS…	0.036	1.525	89	3.61991	1	1	1	0.105	NA	0	NA	NA	NA	0	NA	NA	NA	0	NA	NA	1.9	3.61991	1	1	NA	0	NA	NA	0	1	0	0	0	1	1 PSM	ITAG only
Solyc02g065660	WPP domain-interacting tail-anchored protein 1	AT5G11390	MNADTANGKLVNLDLFVMHVETRESDFEAFASEKEGTSNDIVEKAIEFDLLSGVLDSEVTELSGLLSSVATEIDNVRKVISSRGYADEAFILIEEKLYDSEKSLKQLQDHLLELRAQCTNFHGIMLTSQGDRDWQDGEAADYFNSDALLTPKTKIKMQTVEQQRHILRMLEKSLARELDLEKKLTESRQVEEELEVRLQQEAFCMEEEIEDASQRLFEGENAAEVLLGISKSLLGRLQMTHFNLNGTVQKESYLQSKLQEMEEHLKAKDNLLGKSESTSKELGDKVKSLEKRLEDSEFQLSNTTSARNSQEIESKILEMEDIINTLKEKNSEAERRIDTAETECKILKEANVELDKELNFLKSSSSITSERIIVLEKQLRNSELQLQHAVASAEASQEK…	0.001	4.324	1	3.83387	2	3	2	0.129	NA	0	NA	NA	NA	0	NA	NA	NA	0	NA	NA	2.2	1.75719	1	1	4.09	3.83387	2	2	1	1	0	0	0	2	Sporadic	ITAG only
Solyc02g066920	Genomic DNA chromosome 5 TAC clone K3 (AHRD V1 ***- Q9FL87_ARATH)	AT5G39210	MEAQLWCNKTYNCIGTETWRIQHPLQILHTSNWQQPIFQPFNSSISHSLTCRHIHRNGIKTFATRRRRSNIETDTYVLMEPGKSEEFVTEEELRDKLKSWLENWPAKTLPPDLARFEDSDDAVEYLVKSVCELEIDGDVGSLQWYQVRLQQDII	0	11.631	0	15.5844	2	8	2	0.778	6.69	15.5844	2	2	6.23	15.5844	2	2	5.31	15.5844	2	2	2.69	7.14286	1	1	3.02	7.14286	1	1	1	1	1	1	1	5	WTSP	Detected by both ITAG and Atlas
Solyc02g066930	RNA-binding protein (AHRD V1 *--* Q941H9_TOBAC); contains Interpro domain(s) IPR015465 RNA recognition motif, glycine rich protein	AT1G74230	MSSSKLFVGGLSYGTDETSLREAFSQHGQVIEARVIFDRDSGRSRGFGFVTYTSAEEASSALSALDGQDLHGRRIRVNYATEKRPGGFGRGSGGGGGFSYGGGAGGYSYGNYGGGGNYGSNNSYPAGGGSYGGDSFGAGYGGGSSGSYNAGVSASNDFLNNSEFGGSPGTSHNGGEEQLSADQGTESVDNDFTPGVERSSSDDNDEPKDYANSRSS	0	5.623	0	6.01852	1	1	1	0.468	NA	0	NA	NA	3.89	6.01852	1	1	NA	0	NA	NA	NA	0	NA	NA	NA	0	NA	NA	0	0	0	1	0	1	1 PSM	Detected by both ITAG and Atlas
Solyc02g066950	Alpha amylase 2 (IC) IPR006589 Glycosyl hydrolase, family 13, subfamily, catalytic region	AT1G69830	MDYSTEALTDDEDGDSLGRSKVVGIDDDELLATRKSLSDVQARNKTIEKERDQLLEKVARSEAKQKEYLSTVMHDKDLAISELESAKALFNRKLEESLEEKFNLESKLVLAKQDAVELAVQVEKLAEIAFQQATSHILEDAQLRVSAAEASAAEAAFQIEEQIRTASDGAITYVLQQSKDAIEKALAVAESSGEHTTNAMAAFVDNMDRDDEIVTVQSQNIKLSNTLNDLESQLLVNRNEIDRVKLELKQARKEAKVYELRANDVEKLLLEFQESSRKAALQQEEEIKSSLEKMRKDATEKKKAASKAFKLELERMKTAIEAAKETARSQDEAYTRRCEALQRSLKAAEAASKTWRQRAEMAEDLLLRRSCSEEGDEEAIYRVNGGRIDFLMDDDSLKW…	0	49.246	0	13.0387	10	23	10	0.931	36.73	11.9337	9	11	6.48	2.54144	2	3	10.37	4.64088	4	4	10.07	4.64088	4	4	2.95	1.10497	1	1	1	1	1	1	1	5	WTSP	ITAG only
Solyc02g067050	Uncharacterized ACR COG1678 family protein (AHRD V1 **-- B6SSQ6_MAIZE); contains Interpro domain(s) IPR003774 Protein of unknown function DUF179	AT3G29240	MEACFVTSKPLSEKLFPLLGSRVSYSTRRRSFVSQFHQPKKVGNPFSVTCCQASSPLPSPSPQDEERPFTETDWRSFRARLVAGERASRSEDRSSVVNPDTVDDLPPPPAVTIGSKWAHTIHEPEKGCILIATEKLDGVHIFERTVVLLLSMGPIGPMGLILNRPSLMSIKEMKPSVLDMSGTFANRPLFFGGPLEDELFLVSPNEDGLGKSGVFDEVMRGLYYGTKESVGCASEMVKRDVVGVDNFRFFDGYCAWEKDQLKDEIRAGYWTVAACSPSVIGLSDVGSVGLWDEVLGLMTPKKVW	0	4.961	0	6.25	2	2	2	0.425	2.4	3.28947	1	1	2.05	2.96053	1	1	NA	0	NA	NA	NA	0	NA	NA	NA	0	NA	NA	0	0	0	1	1	2	WTSP	Detected by both ITAG and Atlas
Solyc02g067180	Cystathionine gamma synthase (AHRD V1 ***- Q6R8F6_SOLLC); contains Interpro domain(s) IPR000277 Cys/Met metabolism, pyridoxal phosphate-dependent enzyme	AT3G01120	MAVSSYARAFPSFECRSEPDFSGSLPHPKAGVRFSGKYNSGSNRSQVYGLSSLIYRFPPNFVRQLSIKARRNCSNIGVAQVVAASWSNNQAGPEFTPAANAVDSSASAAVTSIGITTGDEEVAVVENADCSDQNVQIKGSTGVKYASFLNSDGSVAIHAGERLGRGIVTDAITTPVVNTSAYFFNKTSDLIDFKEKRRASFEYGRYGNPTTVVLEEKISALEGAESTLIVASGMCASTVMFLALVPAGGHIVTTTDCYRKTRVFIETILPKMGITATVIDPADMGALELALNQKKVDLFFTESPTNPFLRCVDIELVSKLCREKGALVCIDGTFATPLNQKALALGADLVVHSATKFLGGHNDVLAGCISGPEKLVSVIRNLHHILGGALNPNAAYLII…	0	66.53	0	22.4074	11	57	11	3.217	29.07	16.4815	8	10	40.62	20.5556	10	14	36.58	15.1852	7	12	33.04	17.037	8	13	18.51	12.4074	6	8	1	1	1	1	1	5	WTSP	Detected by both ITAG and Atlas
Solyc02g067360	Protease Do-like (S2 serine-type protease) (AHRD V1 **** Q7UQ70_RHOBA); contains Interpro domain(s) IPR001254 Peptidase S1 and S6, chymotrypsin/Hap	AT5G39830	MEVIIVSSNAKTPIHLHTNQPQPPILNNSVFLGRRELCFDSISTVCSADPITSNPSTSVSAPRGGGDNGNSLIEQLRRSFPFATRRMLLTSFFMYSCYHPSRYLSALALGDPSVTVEQVTPTIFPSAALFPLEERVVELFEKNTYCVVNIFDVTLRPTLNVTGMVEIPEGNGSGVIWDKEGHIVTNYHVIGNSLSRNPSRGQVVARVNILAADGVQKNFEGILIGADRAKDLAVLKVGASEDLLRPIRVGESSSLRVGQQCLAIGNPFGFDHTLTVGVISGLNRDIYSQTGVTIGGGIQTDAAINPGNSGGPLLDSKGNLIGINTAIFTQTGTSAGVGFAIPSSTVLRVVPQLIQSGKVLRAGLNIEIAPDLIANQLNVRNGALVLLVPGNSPAAKAGL…	0	35.444	0	19.7849	9	30	9	3.437	13.09	8.3871	3	5	23.85	14.8387	6	10	8.37	4.94624	2	3	16.86	13.5484	5	7	12.5	6.23656	3	5	1	1	1	1	1	5	WTSP	Detected by both ITAG and Atlas
Solyc02g067540	Methyltransferase (AHRD V1 *-*- B9LJG4_CHLSY); contains Interpro domain(s) IPR016065 Protein of unknown function methylase putative	AT3G28460	MAVSSSHTAFSFLSPLRSHSIVPETSLLSFNPALVGYPFTATNRRRPFIITVSSKSKNELSVDKKRQLLEQYGLNPDEYLSEPSPKTKKRREQSKSGTGKQVLVEEPKHTRETHKLLQVVGGTARRKKLLSPKSMDVRPMMEVVKAAAFGILQAAGGCPASLRPGRWLDLYSGTGSVGIEAISRGCSEVHFVEMDPWVVSDVLRPNLEWTGFLDASVIHTVRVESFLERAEHFLGKDGSFDYISVTPPYAVVDYSILMDQISKSSIVGENTFILVEYPFRTDMLDSCGCLVKISDRRFGRTHLAIYGPKWALKKKYVEKTKRKQEKLDLLKEVEISAS	0.057	1.488	82	2.95858	1	1	1	0.179	1.91	2.95858	1	1	NA	0	NA	NA	NA	0	NA	NA	NA	0	NA	NA	NA	0	NA	NA	0	0	0	0	1	1	WTSP	Atlas only
Solyc02g067830	Ribosomal protein S6 kinase alpha-3 IPR002290 Serine_threonine protein kinase	AT3G27580	MRQSRCKELSFDPIAIDIGSKLTDTPTGSVAASKSLHKSSSDRIKRDDVSGSRRHYSESTKEKECQSIEDALDQPSEECSLDRVLIFETKSSIKDPLHDNKHTTPGGYVERRDFMLHAVARGDADLLNGQLTSQSGISYCPSPQNSFYTATQYIEPKQSFSTTEVISECASSMGKSGGSGNVSNSCDISDSRKTSFYRGSTGSDISDESSSTSVGSTMYKPHQANDTRWDAIQAIRSIDGTLGFNHFRLLKRLGGGDIGNVFLAELIGTRDYFAMKVMDNAALESRKKTVRAQTEREILQSLDHPFLPTLYSHFETDKFSCLVMEFCPGGDLHALRQRQPGKFFPEHAARFYVAEILLALEYLHMLGIIYRDLKPENVLVREDGHIMLSDFDLSLRCAV…	0.043	1.457	107	2.87081	1	1	1	0	NA	0	NA	NA	NA	0	NA	NA	NA	0	NA	NA	NA	0	NA	NA	3.19	2.87081	1	1	1	0	0	0	0	1	1 PSM	ITAG only
Solyc02g068050	SET domain-containing protein (AHRD V1 ***- D7M620_ARALY); contains Interpro domain(s) IPR001214 SET	AT5G14260	MDLVYSSMAKCISAPFPSFTHRPLALFSRVSISPKYANARRLWKMCSASSSDTLVDNGPVKEGSKSLEVASKKEGEYGDLKSWMHENGLPPCKVVIKDRPSHDAKHLPIHYVAASEDLQAGDIAFAVPDSLVVTLERVLGNETIAELLTTNKLSELACLALYLMYEKKQGKKSFWYPYIRELDRQRARGQLAVESPLLWSDAELDYLTGSPTKADVLERAEGIKREYNELDTVWFMAGSLFQQYPYEIPTEAFPFEIFKQAFVAVQSCVVHLQKVSLARRFALVPLGPPLLSYCSNCKAMLAAVDGAVQLVVDRSYSAGDPIVVWCGPQPNSKLLINYGFVDEENSHDRLMVEAALNTEDPQYQDKRLAAQRNGKLSVQAFQVCVGKEREAVLEMLPYL…	0	43.28	0	17.4419	5	21	5	1.783	17.81	13.4884	4	5	11.3	9.76744	3	3	19.92	17.4419	5	6	20.13	14.8837	4	6	3.12	2.55814	1	1	1	1	1	1	1	5	WTSP	Detected by both ITAG and Atlas
Solyc02g068090	30S ribosomal protein S21, chloroplastic (Fragment) (AHRD V1 *--- RR21_SPIOL); contains Interpro domain(s) IPR001911 Ribosomal protein S21	AT3G27160	MAVSSIANLFSFFNPSKPPTPKAPTLQFSPSAVDSLTSSRPNNDSSSMVVSSNDNHKYPILPVSSSDSDVMAVTCPSLAYANTLYFRSAYNVQVIVGDNEPEEKLLGRFRREVMRAGVIQECKRRRYFENSQDEKKRRTRDAARRNRRRRGPPRNFSDDKQETTKSKRDDDGEDNWELPDGGVAF	0	14.507	0	15.1351	2	10	2	2.981	5.72	15.1351	2	3	2.77	9.18919	1	1	7.29	9.18919	1	2	3.82	9.18919	1	1	10.24	9.18919	1	3	1	1	1	1	1	5	WTSP	Detected by both ITAG and Atlas
Solyc02g068350	Uroporphyrinogen-III synthase (AHRD V1 ***- Q3M8K2_ANAVT); contains Interpro domain(s) IPR003754 Tetrapyrrole biosynthesis, uroporphyrinogen III synthase	no hits	MQHPPLFPFPVPSPENSRRNCVIAFTTPQNYAPRLSELIHLKGWTPLWCPTVIVESTEQTISSIHHYLNPQAGIDEPNSFLEEFSALAFTSRTGITAFSQALSMNPTPPLTPNGEILTIAALGNDAELLDRDFIRKMCENPERIRVLVPSVATPSGLVEALGLGQGRKVLCPVPLVIGLNEPPVVPKFLDDLSKRGWIPLRLDAYETRWAGATCAVDVVAKSEEECGFDAIVFTSTGEVEGLLKSLEEFGLDWSMVRRRCPRMVVAAHGPVTAAGAESLGVGIDVVSSNFGSFDGVVDALAHKWKSLQNQES	0	8.853	0	9.29487	3	4	3	1.512	1.75	2.5641	1	2	NA	0	NA	NA	NA	0	NA	NA	2.94	6.73077	2	2	NA	0	NA	NA	0	1	0	0	1	2	WTSP	Detected by both ITAG and Atlas
Solyc02g068700	Histidine triad (HIT) protein protein	AT1G31160	MAAMSSLTLLRGPSLVKALGFIKTSNYIPRIVPASRYPLQSQRSYVASAHDEEAAARAAAVNADTGAPTIFDKIIAKEIPASVVYEDQKVLAFRDINPQAPVHVLIIPKSRDGLTELGKAEQRHEDILGNLLYAAKIVAEKEGIVDGFRVVINSGPSACQSVYHLHLHVLGGRQLKWPPG	0	41.219	0	42.7778	7	36	7	3.924	29.65	38.3333	6	9	21.53	38.3333	5	7	29.87	40	6	9	19.97	28.8889	4	6	16.94	26.1111	4	5	1	1	1	1	1	5	WTSP	ITAG only
Solyc02g068730	chaperonin (AHRD V1 ***- B2IXD2_NOSP7); contains Interpro domain(s) IPR001844 Chaperonin Cpn60	AT5G18820	MSLSMCSPLYSPLKLSFKEDKGKGNSWGLRQSLGKKKLMVVRAGPKRIAFDKECRRALLSGINKLADAVSVTLGPRGRNVVLSEAGGLKIINDGVTIAQAIELPDTIENAGATLIQEVATKTNRLAGDGTTTAIVLAREMIKAGLLAVDFGANPVSMKKGMDQTVRELVNTLKKKSHPVRGNDDIKAVASISAGNDEFIGSLIAEAINKIGPDGVICIESSSSAETSIMVEEGMKIDKGYMSPHFINNPEKSIVEFENAKVLVTDQKICSVKEIVPLLEKATQLSVPLLIFAEDITNQVLETLVINKMQGMLNVAVVQCPGFRDGKKGVLQDIAMLTGADFLSGDLGLTLESATSDQLGIARKITITSNSTTIVAHPSTKAEIQARIMQIKKDLAETDN…	0	6.034	0	5.31732	3	4	2	0.334	4.12	2.5729	2	2	0	1.20069	1	1	2.67	2.74443	1	1	NA	0	NA	NA	NA	0	NA	NA	0	0	1	0	1	2	WTSP	Detected by both ITAG and Atlas
Solyc02g068930	Cytochrome c6 (AHRD V1 ***- D7MKY9_ARALY); contains Interpro domain(s) IPR003088 Cytochrome c, class I	AT5G45040	MTVLCMIPSCLSKSCSLANPTKSRNVYEGDKPFVQRENKLACELKLLKSLALPLMTAFIALSPIVNPPVSIGQTTDVQKGASLFNRACIGCHYEGGNIIQPGATLFLKDLQRNGVDTEEEIYRVTYNGKGRMPGFGQNCTPRGQCTFGPRLQDDEIKLLAEFVKSQADQDWPKIENSGD	0	6.156	0	10.0559	2	10	2	0.425	2.17	10.0559	2	3	4.69	10.0559	2	3	2.92	6.14525	1	1	4.78	10.0559	2	2	2.41	6.14525	1	1	1	1	1	1	1	5	WTSP	Detected by both ITAG and Atlas
Solyc02g069010	Inositol monophosphatase family protein (AHRD V1 **** D7KK98_ARALY); contains Interpro domain(s) IPR000760 Inositol monophosphatase	AT1G31190	MGRCLLSSTISSLRICQLPRIRLPVFPKSRSTNSQYGFCTSLSTGGGFCTKAALSEVGIKKEYSKVAADSTGSIPSSELLKVVEAAAKTGAQVVMDAVNKPRNVTYKGLTDLVTDTDKNSEFAILEVVRKNFPDHLILGEEGGIIGDSSSDYLWCIDPLDGTTNFAHGYPSFAVSVGVLFRGKPAAAAVVEFVGGPMCWNTRIFSAAAGKGAFANGEKIHVSRTDKVEQSLLVTGFGYEHDDPWATNMELFKEFTDVSRGVRRLGAAAVDMCHVALGIAEAYWEYRLKPWDMAAGVLIVEEAGGTVSCMDGGSFSVFDRSVLVSNGLLHAKLLEKIGPATENLKSKGIDFSVWFKPENYHTEV	0	49.5	0	19.2837	6	58	6	4.179	34.29	13.7741	4	10	28.96	13.7741	4	9	43.85	16.2534	5	15	39.64	13.4986	4	12	32.88	17.0799	5	12	1	1	1	1	1	5	WTSP	Detected by both ITAG and Atlas
Solyc02g069100	Cathepsin B IPR015643 Peptidase C1A, cathepsin B	AT4G01610	MALTLKSLITPLLFGAFFILILQQVAAEKPITEAKLESAILQDSIVKQVNENAEAGWKAAFNPQLSNFTVSQFKRLLGVKPAREGDLEGIPVLTHPKLKELPKEFDARKAWPQCSTIGRILGQDIAVLVGLLVLLSRCLIVSVSIIICISLSVNDLLACCGFLCGSGCDGGYPIAAWRYFKRRGVVTEECDPYFDTTGCSHPGCEPLYPTPKCHRKCVKGNVLWRKSKHYGVNAYRVSHDPQSIMAEVYKNGPVEVSFTVYEDFAHYKSGVYKHVTGGNMGGHAVKLIGWGTSEQGEDYWLIANSWNRGWGEDGYFKIRRGTNECGIEHSVVAGLPSARNLNVELGDAVLDASM	0.004	2.297	9	3.67232	1	1	1	0.166	NA	0	NA	NA	NA	0	NA	NA	NA	0	NA	NA	2.91	3.67232	1	1	NA	0	NA	NA	0	1	0	0	0	1	1 PSM	ITAG only
Solyc02g069130	Peptidyl-prolyl cis-trans isomerase (AHRD V1 *-*- B1WW43_CYAA5); contains Interpro domain(s) IPR001179 Peptidyl-prolyl cis-trans isomerase, FKBP-type	AT4G19830	MRMIKVLPLPCPTYLYLHKIEASTSSTHKSRRAFSLSALTISLSALVFSSGNAPTTSISWANPQVPKFLDLPNSGGVKALDLRVGDGETPIDGDLVAIHYYGRLAAKQGWRFDSTYDHKDETGEPIPFSFVLGSGKVISGIETAVKSMKVGGLRRVIIPPSQGYQNTSQEPLPPNYFDRQRLFTTIFNPTRLANGEGATLGTVIFDIELVSLRHL	0	8.235	0	14.4186	3	8	3	1.683	2.26	4.65116	1	1	2.73	4.65116	1	1	4.97	9.76744	2	2	2.54	5.11628	1	1	7.33	14.4186	3	3	1	1	1	1	1	5	WTSP	Detected by both ITAG and Atlas
Solyc02g069290	Transducin-like IPR011989 Armadillo-like helical	no hits	MASLQELLADEGFEKTKKTHRKVKFKDREDSNNIALPIYICHDRRSSSLDFSKTKSRRPFSTTTTSSVHSSQKSNVKSTHTHVGGNITRRDEPAIDEIAIRAVISILAGFVGQYSRDKDFRKAIKEKCYACFVRKKDGIFADIELAIESIERLVDSIGDTKREVKVKSLQYSIRLLTIVASLNSNNSGNASTCGIPNSNLSACAQLYLSIVYKLEKNDRIAARHLLQVFVDSPCIARTHLLPELWEHLFLPHLLHLKIWHTQELEVLSSSDYAEKEKHMKVLNKLYNDHVDIGTTKFALYYKQWLKVGAQAPAVPSVPLPSKVGYSTSRRRSMDSVTSNSSVKNNSLYRAVFGPITERKSMDDARNGIWDYEEDEKEKILSIGDDFKQSNYSPKKTVVH…	0.017	1.817	41	0.898204	1	1	1	0.044	1.84	0.898204	1	1	NA	0	NA	NA	NA	0	NA	NA	NA	0	NA	NA	NA	0	NA	NA	0	0	0	0	1	1	1 PSM	ITAG only
Solyc02g069410	HAD-superfamily hydrolase subfamily IA variant 3 containing protein expressed (AHRD V1 *-*- Q10I42_ORYSJ)	AT5G45170	MAIERASCPVLNTLRFCTKNSSKLYNFPRKHLQFPSFFPRNFNSINGKLYTHGLFLNSSSSFSNTTQETPSQKLALLLEVEGVLMDVDRLGNRQAFNTAFRKLGLDCANWSQPVYQDLVKKSMGDEERMLVLFFNRIGWPTSLPTSEKETFMKTVLREKRIALDELVMSKTLPLRPGVEEFIDEACEEGVPVVMLTAYCKSGEKQVRSIIEKLGNDKMAKIKIIGTEEVKRSAYGQLVLGEGVASDLGEQLAKEARKAVSAEEQRIAKEVASILKLTVDIDTTSSEGLQNVVAALRAGAEYADVPVHNCVLVSGSLSGVAGAERIGMSCVVVRSSSTARAEFPGAKAIMDGFGGADLTISRLRQIQES	0	49.116	0	22.8261	9	31	9	4.08	30.82	22.8261	9	11	21.91	18.2065	6	8	17.93	12.7717	5	7	4.99	5.97826	2	2	6.91	7.33696	3	3	1	1	1	1	1	5	WTSP	Detected by both ITAG and Atlas
Solyc02g069460	Photosystem I reaction center subunit III (AHRD V1 ***- Q9XQB4_PHAAU); contains Interpro domain(s) IPR003666 Photosystem I reaction centre protein PsaF, subunit III	AT1G31330	MSLTIPTSLSKPISTSKFGSQFTTKQRTSAIVCCSNQTPVSNSTEESSSSLKAFSAALALSSILLSAPVLPASADISGLTPCKDSKQFAKREKQQIKKLQNSLKLYAPDSAPALAINATIEKTKRRFDNYGKQGLLCGSDGLPHLIVSGDQRHWGEFITPGILFLYIAGWIGWVGRSYLIAVRDEKKPTMKEIIIDVPLANRLVWRGFIWPVAAYREYLNGDLIDPNV	0	11.14	0	15.7895	3	3	1	1.154	2.89	7.89474	1	1	NA	0	NA	NA	NA	0	NA	NA	NA	0	NA	NA	2.55	7.89474	2	2	1	0	0	0	1	2	WTSP	Detected by both ITAG and Atlas
Solyc02g069620	Ribose 5-phosphate isomerase-like (AHRD V1 ***- Q2LC22_9ASTR); contains Interpro domain(s) IPR004788 Ribose 5-phosphate isomerase	AT5G44520	MSNMAMAMALPSSTSPFLFSCTTQKQAHNFTSSRKPLHRFVTRSTLSDDLFLAAKHTVDSYVKNGMVVGLGSGHASTLAIQYLGQKLRAGTIKDVTAIPTCVSSASEAAKAGIPLEQYDDSLKIDLAFDEADIMEEETLAAIIGRRKLQGDDSIIKEKTILEAADQLIFIIKEKQFKGGVEGSVPVLIKSVNWLETAEEIDDLFLGDAEVWRRPAIGYAGPLGGDFPLVTKEGHNILDVIFTSPIESLVEVAKILDQIDGVVEHGVIFRKPCTAIIASENDLQIVDNTFLMESSNF	0	38.443	0	25	5	32	5	5.31	29.31	25	5	8	24.16	20.9459	4	7	26.06	16.5541	3	8	17.84	16.5541	3	5	13.97	4.72973	1	4	1	1	1	1	1	5	WTSP	Detected by both ITAG and Atlas
Solyc02g069850	40S ribosomal protein S25-1 IPR004977 Ribosomal protein S25	AT2G16360	MAPKKEKAPPPSSKPAKSGGGKQKKKKWSKGKQKEKVNNMVLFDKGTYDKLITEAPKYKLITPSVLSDRLRISGSLARKAIRELMAKGLIRMVSAHASQQIYTRATNT	0	5.906	0	12.037	1	2	0	1.154	5.18	12.037	1	2	NA	0	NA	NA	NA	0	NA	NA	NA	0	NA	NA	NA	0	NA	NA	0	0	0	0	1	1	1 Peptide	ITAG only
Solyc02g070390	PTAC12 (AHRD V1 ***- D7LH29_ARALY)	AT2G34640	MASVLSTSLYQDRGLRIVASTDGFVPTICCPYRKTLFTGTTPVSIWKLKFVSSSPFQKAPLAPCIKCENKEKNQGSFEQVSVERFPYHSYMDSTSGQLEPASGARASIPGKEYWPEGTASRVQAARAPEPDGISTGTPSYGKAPGSRRKKYKASASSSQPSEINVISDDPLETPDSVPEEPKDLSSEYVIYQPEQDEEELTGYELDKRHGRPHPFIDPKVKKEIEKPLTSEELWWNWRKPEKEQWSRWQRRRPDVETVFLKAMAETGQVKLYGEHPTLTETALYRARRHLYKEERLQAEKEKMEKIGPIAYYSEWVKAWKRDTSRDAIQKHFEETGEDENTQLIEMFSHQTDREYRIMMGTDMRIPRDPLAMRMREDQIKQIWGGDPVYPTINYIQDPD…	0	29.138	0	13.447	6	14	6	0.995	17.81	11.3636	4	5	5.71	4.35606	2	2	9.14	8.52273	3	3	2.62	2.27273	1	1	8.86	5.49242	3	3	1	1	1	1	1	5	WTSP	Detected by both ITAG and Atlas
Solyc02g070490	Alpha_beta hydrolase fold IPR000073 Alpha_beta hydrolase fold-1	AT5G38520	MKATTIWGLKKRRGTCDLKHFLPQEASLFSVLLCKKHKYSHCAASLSMKAMVVAVRASPLVFLPSSPFAASRNLKKQCSNTIISFNIRLQSSHSKSSCITISSIKCSASSTSAIVSKEEEPLPLEVNEIKTLCKTWVWRGYNINYLSYPGHNNDTCRPSLLLVHGFGASVAHWRRNIATLAQNYRVYAIDLLGFGASDKPEGFAYNMETWAELILDFVNQVIQRPTVLVGNSVGSLACVIAAADPSQTSIQGLVLLNCAGGMNNKAIVDDWRIKLLSPLLWLVDFLLSQKPIASSIFTRVKQRENLKNILLSVYGNKESVDEDLVDIIRTPADSEGALDAFVSIVTGPPGPNPVQLIPKMTLPILVLWGDQDPFTPIDGPVGRYFSSLPSQKPNVSLFL…	0	13.593	0	7.8341	4	16	4	0.778	13.27	7.8341	4	5	13.14	7.8341	4	5	8.2	7.60369	3	3	4.78	5.29954	2	2	3.27	2.99539	1	1	1	1	1	1	1	5	WTSP	ITAG only
Solyc02g070500	Susceptibility homeodomain transcription factor (Fragment) IPR007493 Protein of unknown function DUF538	AT1G30020	MSQVIASHRENAEIYTDPVVCKQKSLELLKEINMPNGLLPLEDIVEVGRNAETGFVWLKQKKAKEHKYKKIGKLVWYDTEVTAFVENRRMKKLTGVKSKEILIWVTISDISISDPECKKINFATPTGLSRSFPVSAFEEEEEEEEKK	0.002	3.235	5	6.80272	1	4	1	0.389	NA	0	NA	NA	2.82	6.80272	1	1	2.12	6.80272	1	1	2.24	6.80272	1	1	1.89	6.80272	1	1	1	1	1	1	0	4	1 Peptide	ITAG only
Solyc02g070510	Proteasome subunit alpha type IPR001353 Proteasome, subunit alpha_beta	AT3G14290	MFLTRTEYDRGVNTFSPEGRLFQVEYAIEAIKLGSTAIGLKTKEGVVLAVEKRITSPLLEPSSVEKIMEIDEHIGCAMSGLIADARTLVEHARVETQNHRFSYGEPMTVESTTQALCDLALRFGEGDEESMSRPFGVSLLIAGHDENGPSLYYTDPSGTFWQCNAKAIGSGSEGADSSLQEQYNKDLTLKEAETIALSILKQVMEEKVTPNNVDIARVSPTYHLYSPSEVEEVISRL	0	6.448	0	8.86076	2	2	0	0.52	NA	0	NA	NA	4.37	8.86076	2	2	NA	0	NA	NA	NA	0	NA	NA	NA	0	NA	NA	0	0	0	1	0	1	Sporadic	ITAG only
Solyc02g070770	NAD-dependent epimerase/dehydratase (AHRD V1 **-- B8HW76_CYAP4); contains Interpro domain(s) IPR016040 NAD(P)-binding domain	AT2G34460	MATATGLFFLKTSAFSITSKRPSVSLFVNKVHSFRLRAANIEESEIEGEEEVGISEKKKIFVAGATGNTGKRIVEQLLAKGFAVKAGVLDVDKAKSTLPGQNPDLQIVKADVTEGSVRLADAIGNDSDAVICATGFRRSLDFLAPWKVDNFGTVNLVEACRTLGVKRFLLVSSILVNGAAMGQLFNPAYVFLNVLGLTLIAKLQAEQYIRRSGINYTIIRPGGLKNDPPQGNIVMEQEDTLYEGSISRDQVAEVAVEALLHPESHYKVVEIVARTDAPKRSFKELFGSIKQQ	0	25.96	0	24.6575	7	25	7	2.415	13.39	17.1233	5	6	15.07	21.9178	6	6	14.73	14.726	4	6	9.69	10.274	3	4	7.9	10.6164	3	3	1	1	1	1	1	5	WTSP	Detected by both ITAG and Atlas
Solyc02g070790	3-oxoacyl-(Acyl-carrier-protein) synthase 2 (AHRD V1 **** D0ZZB8_CHLPP); contains Interpro domain(s) IPR017568 3-oxoacyl-[acyl-carrier-protein] synthase 2	AT5G46290	MEAIQSLSFRPSPLEPLRKNIPQFTNVRSLGAKRVPLTVTASASTVSAPKREKDPKKRVVITGTGLVSVFGNDADTYYDRLLAGESGISLIDRFDASKFPTRFGGQIRGFTSEGYIDGKNDRRLDDCLRYAIVAGKKALENADLGGDRLEKIDKERAGVLVGTGMGGLTVFSDGVQNLIEKGHRKITPFFVPYAITNMGSALLGIDLGFMGPNYSISTACATSNYCFYAAANHIRRGEADLMLAGGTEAAIIPIGLGGFVACRALSQRNDDPQTASRPWDKERDGFVMGEGAGILVMESLEHAMKRGAPIIAEYLGGAVNCDAYHMTDPRADGLGVSSCILSSLEDAGVSPEEVNYINAHATSTIVGDLAEINAVKKVFKTTTGIKMNATKSMIGHCLG…	0	50.445	0	13.2196	9	42	8	9	26.46	12.1535	6	8	19.23	8.742	5	7	36.09	10.2345	7	11	21.15	8.95522	5	9	21.85	9.16844	5	7	1	1	1	1	1	5	WTSP	Detected by both ITAG and Atlas
Solyc02g070800	Ycf23 protein (AHRD V1 ***- Q7NE74_GLOVI); contains Interpro domain(s) IPR007570 Protein of unknown function DUF561	no hits	MSISLYTPVSPKNQLQVFLKPNQNPLLLGDSVFPKRVSFARRKCTTRALLSHSKDAVLKEFHEKKALKIIAGLQNLDKENVASVVTAADKGGATHVDIACDPELVKLAISLTSLPVCVSSVDPSAFPAAVEAGALMVEIGNYDSFYEKGLVFSPEQILNLTKETKKLLPSVILSVTVPHTLSLPDQVKLAEQLELEGVDIIQTEGGKCSTPSKAGILGLIEKATPTLAAAYSISRAVNIPVMCSSGLSAVTAPMAIVAGAAGVGVGSAINKLNDQVAMIAEVKSIAHSLGLSTKKQNLFEGSNLIV	0	21.581	0	15.0327	4	17	4	1.61	10.52	11.1111	3	4	7.9	15.0327	4	4	11.98	11.1111	3	4	5.23	7.51634	2	2	7.57	11.1111	3	3	1	1	1	1	1	5	WTSP	Detected by both ITAG and Atlas
Solyc02g071040	Glycogen synthase (AHRD V1 *-*- D1R4V0_9CHLA); contains Interpro domain(s) IPR011835 Glycogen/starch synthases, ADP-glucose type	AT4G18240	MEMKISNCFPTQKWCGGASLSRQVNVRFYPLPSQRLPPASGKMRQRRNFSLQNKKKQTKTINIERPPDVDLQLSDDIDSDTEKMSKQSLSNSNQEVPIEENVDTSTETKSSDESTYSSVDSNEEGQPSSVHLKDLIGMIRNAEKNIHLLNEARVHALEELQKVLGEKEDLHGKINILEMKLAETDARLRVASQEKIHVELLEDQLGKLKNELSSSRGSEENVLHVNNSVPLSRSDLVNSLSEQCDSLRKENMLLKQDLQSMKSELSLVKETDERILMLEKERSVLESSLSELESKLAASQEGVSELSALKLECKNLYEKVEHLQALLAKATKQADQAISVLQQNQELRKKVDRLEESLEEASIYKLSSEKLQQYNEQMQQKIKLLDERLQRSDEEIQSY…	0	19.059	0	7.59241	6	10	6	0.326	8.19	3.8961	3	3	2.92	1.1988	1	1	NA	0	NA	NA	11.48	4.8951	4	4	6.97	2.7972	2	2	1	1	0	1	1	4	WTSP	Detected by both ITAG and Atlas
Solyc02g071190	Carboxyl-terminal-processing protease (AHRD V1 ***- B6SPN8_MAIZE); contains Interpro domain(s) IPR004447 Peptidase S41A, C-terminal protease	AT5G46390	MRLLHSPLPSPSPPLLTSFSPIKASISPKKSSFVSHHEPLQQLLSTGVSLVLSLGLLVSAPISIALESPSLQSSNSSLEVICRENEGEEVYEKDTEVSKVVSNENIVEEAWQIVNDSFLNTSDRRSWSPESWLQKKDDILSSSIQTRSKAHDIIKRMLASLGDPYTRFLSPEQFSKMARYDMTGIGVNLRDVPDGNGGSKLKVLGLLLDGPAHNAGVRQGDELISVNGVDVLGKSSFEASSLLLGPNGTSVNIMVKHGNCGPVQSIDVERQSIAKTPVFYRLDQIENGSTSVGYVRLKEFNALARKDLVTAIKRLEGMGASSFVLDLRDNLGGLVQAGIEIAKLFLNEGDTVIYTVGRDPQNTRNIVAEAPPLITAPVIVLVNKSTASASEIVATALHD…	0	67.3	0	36.0087	14	48	14	5.062	17.75	15.6182	6	6	25.58	22.1258	9	9	33.46	26.2473	9	12	39.03	29.2842	11	14	22.36	17.5705	6	7	1	1	1	1	1	5	WTSP	Detected by both ITAG and Atlas
Solyc02g071280	Ribosome maturation factor rimM (AHRD V1 *-*- A4CTC3_SYNPV); contains Interpro domain(s) IPR011961 16S rRNA processing protein RimM	AT5G46420	MQGSSALSCSSNSISAPVGLCCSQRLTLPFRNQRIGFLENPSSLKIFHFHRNTTLPLLNCTATEEIVEASETEGLFVETGYIYSVHGLQGEVRVKATTDFPELRFSQPGRRWLRQQVTGRDMIQEIELVEGRGHPGQKSWILKFHEINTIEQAQKLVGSALLVKNEDRPILEEGEFYTPDLVGMKVFLKETRELVGTVINVFNSGASDLLHVELLPNQNARPQLEGSASGPLVWVPFVEAIVPNIDLSKREMLITPPKGLLELNIRADERSKKERRQLEWKERKKSQKRLIAAKKILHEMEQDHIFHGFRYGEKNQRSFLANQIVDVNSILLQHALQNKKIPYKRWSFPDFVNALQVNNTLKLSKEFFSKENVEHSSIVSKVQEQGHCLISSGKVAIVL…	0.011	2.347	15	1.37615	1	1	1	0.105	2.31	1.37615	1	1	NA	0	NA	NA	NA	0	NA	NA	NA	0	NA	NA	NA	0	NA	NA	0	0	0	0	1	1	WTSP	Detected by both ITAG and Atlas
Solyc02g071320	Unknown Protein (AHRD V1)	no hits	MPSGAKKRKAAKKKKQVQAVEPPSRSTGSFPGEEDLKRDDKESDSEGSSPASQDYQNHQNQFTEGEVEDGEKQLDDSRDRSIEENEFNGVKHEGKEVEIAGNEEGGLVQVERELKVECESESQKISVENAEIMIESNPGGLQRSSSSSSSSSSVEKYDVADKNDVVVDDAPTVELAKGIESLPAVGLVKDNESLPDEQVADILVGTISACDLDKAAISEDIVQVTASASDADNVIASAVESVVEEKGEENLCVVDEKDTASDTVVENWKENLGAIVDKATISEVLMETGSEKRDETATAVSCNASAISSGNTLESTDAKAFAIVENEEKIEAPHSAPKIDASVSADVKESPARECHGHQRYLHDQCKQLPGKVAVACLSCLQDQIDESRIRA	0.002	3.719	3	4.33673	1	2	1	0.116	NA	0	NA	NA	NA	0	NA	NA	NA	0	NA	NA	3.3	4.33673	1	1	3.04	4.33673	1	1	1	1	0	0	0	2	1 Peptide	Detected by both ITAG and Atlas
Solyc02g071330	SH3 domain-containing guanine exchange factor IPR001452 Src homology-3 domain	AT4G18060	MVIDEMEMQLHHQLDKLYKSTREKRDFQKEIVKAAETFTAIGYKHIEPGTKLSEDCCKYGVENPNDEVLAKAASIYGDARKHAEKEVEDLNKLFFSQVLEPLRAMVAGSPLEDARHLAQRYSKMRQEAEIQATEVSRRQARVREAPIPENVAKLHSAETKMQELKANMTVLGKEAAAALAAVESQQERLTFQRLVAMVEAEKLYHERVAVILGNIEAEIVSEKQRKEAAPPVATLPVNPPAQIPEKTKYFLAEAIHSFEAESEKELSLSVGDYVVVRKVTQSGWSEGECQGRAGWFPSEYVEKRQRVPTSNGATEAY	0.047	1.43	117	5.04732	1	1	1	0.116	NA	0	NA	NA	3	5.04732	1	1	NA	0	NA	NA	NA	0	NA	NA	NA	0	NA	NA	0	0	0	1	0	1	1 PSM	ITAG only
Solyc02g071710	GDSL esterase_lipase At1g29670 IPR001087 Lipase, GDSL	AT1G29670	MGSGMKIWFVLLTTIFVINFRPFLVMVKGEPQVPCLFIFGDSLFDNGNNNDLLTTAKANYPPYGIDFPDGPTGRFTNGKNSADFLAELLGFNKFIEPFATVKGVDIVRGVNYASGAAGIRDESGIHLGDRISLNRQLRNHKVTISHMSTLLGNKTLTMDYLSKCIYIVGMGNNDYINNYLMPQFYPSSHLYNPEKFATILMQQYSKQLKTLYHYGARKVAVFGVGSLGCIPAELAMYGTKDTICVDSINSAVQKFADKFKPMIDDFNNNLPSANFIYINLTSIAIGDPAQIGLTNLAEPCCEISSVIAKGQCLKGGGACSDRASHYFWDGFHPTEIPNKVTAIRAYTALLPTDAYPFDISHLAATTLALNKIGQSGAEII	0	30.941	0	21.5789	7	21	6	3.394	9.94	12.1053	4	4	20.63	18.4211	6	8	9.08	6.31579	2	3	9.24	6.05263	2	3	10.13	8.15789	2	3	1	1	1	1	1	5	WTSP	ITAG only
Solyc02g071890	Histidinol dehydrogenase IPR012131 Histidinol dehydrogenase, prokaryotic-type	AT5G63890	MKSYKLSELTTSEVDSLKARPRIDFSSIFGTVQPIVDDVRNRGDAAVKDYTSRFDKVVLDKIVEDVSELPDPELDSSVREAFDVAYNNIYAFHAAQKPVEKVVENMHGVRCKRVARSIASVGLYVPGGTAVLPSTALMLSVPAQIAGCKTVVLATPPSRDGSICKEVLYCAKKAGVTHILKAGGAQAISAMAWGTESCPKVEKIYGPGNQYVTAAKMILQNSEAMVSIDMPAGPSEVLVIADKHSSPVHVAADLLSQAEHGPDSQVVLVIAGDGVDLNAIQEEIMKQCQALPRGEFALKALSHSFTVLARDMLEAISFSNMYAPEHLIINVDEAEKWENLIENAGSVFMGKWTPESVGDYASGTNHVLPTYGYARMYGGVSLDSFLKYITVQSLTEEGL…	0	62.201	0	28.9954	12	43	12	6.079	52.07	28.9954	12	18	29.22	26.9406	10	11	16.95	12.7854	5	6	15.21	13.4703	5	5	10.38	8.44749	3	3	1	1	1	1	1	5	WTSP	ITAG only
Solyc02g072160	NADH ubiquinone oxidoreductase complex I intermediate-associated protein 30 IPR013857 NADH:ubiquinone oxidoreductase intermediate-associated protein 30	AT4G18810	MNPERKPQEQEWRESERGKLAFGKMESCYFSVTKPSSSSTILNFQGVSSLGGRSSQKSLGAPSHLSWPLSGPNKKSQNFVYRRKTFKGPILAEAGKQVNSMDSSGITLVTGATGGVGRRVVDVLRNKKLSVRVLVRNEEKARRMLGEDVDLVVGDVTKASTLLPEYFKGITSVINAVSVIVGPKEGDTPDREKYSQGIKFFEPEIKGDSPEMVEYVGMKNLINAVKKNLGIRTGKLLFGYEGNSFKELPWGALDDVVMGGVSQSTFQIDLTGGENGGPTGLFKGVVTTANNGGFASIRTKNFSEPEDLSAYDGLELRLKGDGRRYKLIVRTSSDWDTVGYTAIFDTVEGWQSVRLPFSSLRPIFRARTVLDASPFDPSQITSLQLMFSKFESDGKLNPT…	0	76.128	0	21.6638	11	84	11	3.047	68.24	21.6638	11	23	49.98	16.9844	9	16	44.76	16.1179	7	16	44.94	15.9445	8	17	33.82	19.9307	9	12	1	1	1	1	1	5	WTSP	ITAG only
Solyc02g072250	LRR receptor-like serine/threonine-protein kinase, RLP	AT4G18760	MAPLFLSFTFLLFLLSTKSSSQSTNLDPNQLKALRSLSVPTGKDPCSPLHNSTICDSSTPFHHLISLKLINCSTDVTLSQSSLKTLSTLQDLQFINCPVSPVHFPSELSSSLQSFTCINSLKKLTSVWLIQLRNVVSLTVSHVPVSASGPSIILNSIKNLQSVTISHANLKGVVPTKWHMNLTYVDLSGNQLKGKIPSSLTELENLLHLNLSSNSLNGTIPNSFGNLLSLRNVSLASNALSGSIPKSISAISGLVHLDLGSNQLNGTVPKFISDMKGLKYLNLERNNFEGVLPFNASFIKKLVVFKVGENSNLCYNHSTLSSKLKLGIAACDKHGLPVSPPPPKEDFSDDTAEDDTPPPKHEHGPSRVVFGVAIGLSSIVFLIILLVLLSKCCK	0.06	1.477	86	4.31472	1	1	1	0.155	NA	0	NA	NA	2.48	4.31472	1	1	NA	0	NA	NA	NA	0	NA	NA	NA	0	NA	NA	0	0	0	1	0	1	1 PSM	Detected by both ITAG and Atlas
Solyc02g072260	H2B histone-fold-like protein (Fragment) (AHRD V1 ***- A7VMP7_TOBAC); contains Interpro domain(s) IPR011112 Rho termination factor, N-terminal	AT4G18740	MGATATAVFSSNSISQLPSFSALCKPNLGIRIPKGVLFNLAEITYGLSLSTNRRDFHCSTLSTIRADGIRRRKSSKDATPGKTSKGSELNIQPSPDSKLPNSLNQEEIISLFKRIQSSISKGDSTSSKKRSTKSSEERPAIDSVLEILRHSKTEAKGTKDDKGSTHQEDQKEPETDYSPTADPRSTRLRSSFVKRSPLQSPFNSKEKVKLKMETSLENHVESEAVKIEEMKLPQLKELAKSRGLKGYSKLKKSELVELLIGC	0	10.655	0	16.7939	3	4	3	0.778	NA	0	NA	NA	4.51	6.10687	1	1	5.64	11.0687	2	2	2.65	5.72519	1	1	NA	0	NA	NA	0	1	1	1	0	3	WTSP	Detected by both ITAG and Atlas
Solyc02g076720	Phosphoribosylformylglycinamidine synthase IPR010073 Phosphoribosylformylglycinamidine synthase, eukaryotes and proteobacteria	AT1G74260	MVSEKINSYPSTITVSTPPTIEIYVSLPFLTINFPRILQQVLAMATSAWDIAATEFLQGFHRQKLALPRHSSKQTNLLLWGTLPRQSSFGYSHKNLRLRSHIPAKISAVVSGNVSSLVDENSGKVQEVAENLIHLYRVPFLQDSATAELLKLVQTKISNQIIGLKTEQCFNVGLKSDLSSDKFSVLKWLLGETYEPESLGSESFLEREQRKHPDAYIVEVGPRLCFTTAWSANAVSICQACGLTEINRLERSRRYLLYVKGSLLDSQINEFASMVHDRMTECIYVEKLTSFKTSIVPEEVRYIPVMEKGRKALEEINEEMGLAFDEQDLQYYTKLFRDDIKRNPTNVELFDIAQSNSEHSRHWFFTGKLVIDGQPVDKTLMQIVKSTLLANPNNSVIGF…	0	166.61	0	24.4003	30	119	24	3.359	98.09	20.4935	25	31	74.67	16.3811	20	25	66.19	15.0788	17	20	73.97	14.7361	16	23	68.74	14.2563	16	20	1	1	1	1	1	5	WTSP	ITAG only
Solyc02g076950	UPF0052 domain protein (AHRD V1 **-- A1CBK9_ASPCL); contains Interpro domain(s) IPR002882 LPPG:FO 2-phospho-L-lactate transferase CofD/UPF0052	AT2G34090	MADGYLGPSPLLKPSSLYTFPFTFSPFSGSPRSLSFSFMASNCSSARHCSCSSTSSSTTHQPSILVFSGGTAFNGVVEELKNLTTRVAHVLPVSDDGGSTAEIVRVLGGPAVGDIRSRCLRLSGQSTSEARAVRILLGHRLPLDARRAKSEWYEIVEGSHELWQDVSKPYRETIRAFLAYFQDQILRRSDEHFCFSNGSIGNFFFAGARIFFQSLDAAIFLFSRVSEIPAESFVLPVISTNERLTLGCELSAIHNISFQLVISA	0.001	4.511	1	4.16667	1	1	1	0.334	2.31	4.16667	1	1	NA	0	NA	NA	NA	0	NA	NA	NA	0	NA	NA	NA	0	NA	NA	0	0	0	0	1	1	WTSP	Detected by both ITAG and Atlas
Solyc02g076960	UPF0052 domain protein IPR002882 LPPG:FO 2-phospho-L-lactate transferase CofD_UPF0052	AT2G34090	MDMDGTVIRGQNEISHPTHGSMQPIDKDASSAPALPSRIKRIFYMSSEGSNLLHEVFPTVNPTVLEQLRSVDCIVFGMGSLFTSICPSLVLLGVGETISSQSCPKVLLLNGTHDRETCGLSASCFVTAITDALNRTYGDPHNCLKNPPNKYINTLLVPKNGLIPMDKESLASQGIFNVVTVDSFPDPKLGVLFDPKSLIQALSNLLTDA	0.004	2.464	9	3.82775	1	2	1	0.292	2.6	3.82775	1	1	NA	0	NA	NA	1.85	3.82775	1	1	NA	0	NA	NA	NA	0	NA	NA	0	0	1	0	1	2	1 Peptide	ITAG only
Solyc02g077280	GTP-binding protein era homolog (AHRD V1 ***- D0MDG4_RHOM4); contains Interpro domain(s) IPR005662 GTP-binding protein Era	AT5G66470	MRALCLNVSLFTATLPKNNTPLIHSYCNCFSTSFPGDNGRFGQRVTTTRRRNSKSEIFLGDEEEVQAGENEKFSSIAEETSRAMRLRRSKGVVDTEEEEEEDDSSMLLSLSVKPDRNMALLDDYEMEELDFVPENPNHRSGYVAVLGKPNVGKSTLSNQMVGQKLSIVTDKPQTTRHRVLGICSGPDHQMILYDTPGVIEKKMHKLDTMMMKNVRSAAVNADCVLVVVDACKVPAKIDEVLEEGVGDLKYKVPTLLVLNKKDLIKPGEIAKRLEWYEKFTDVDEVIPVSAKYGHGVEDVKDWILSKLPLGPAYYPKDIASEHPERFFVAEIVREKIFLQYRNEVPYACQVNVVSYKTRPNAKDFIQVEVIVERNTQKIILIGKEGKALKLLATAARLDI…	0	41.346	0	21.9178	9	31	9	1.555	22.87	17.5799	7	8	22.15	13.0137	5	8	10.29	7.07763	3	4	11.97	12.5571	5	6	14.4	8.44749	3	5	1	1	1	1	1	5	WTSP	Detected by both ITAG and Atlas
Solyc02g077420	Lipase-like IPR002921 Lipase, class 3	AT2G31100	MSSMAEKWEELSGKNKWEGLLNPLDVDLRKYIIQYGELAEVTYDTFISDKVSKYAGASRYSMENLFSNVGLDPSKYRVTKYFYATSSIPLPDAFITKSLSREAWSKESNFMGYIAVATDEGKVSLGRRDIVIAWRGTIQTLEWVNDLQFLLIPGPKVFGDGGLLPLFKPLVHHGFYNVYTSESARSNFNKKSARDQVIEEVKRLVEEYKNEEVSITVTGHSLGASLATLNAFDIAYNKINKTSEGKEFPVTAFVFASPKVGDINFVNAFNKLKHLHVMRIHNVLDIVPKYPPLGYFDVGQEIIIDTTKSPYLNLPGDILTWHNLECYLHGVAGTQGIGLLAGFKLEVDRDIALVNKSSGALKSEYLVPANWWTAKNKGMVQQEDGKWVLNDREEYDIVV…	0.002	4.16	3	3.23383	1	1	0	0.122	2.12	3.23383	1	1	NA	0	NA	NA	NA	0	NA	NA	NA	0	NA	NA	NA	0	NA	NA	0	0	0	0	1	1	1 PSM	ITAG only
Solyc02g077680	Phosphorylase (AHRD V1 **** B9H2Q8_POPTR); contains Interpro domain(s) IPR011833 Glycogen/starch/alpha-glucan phosphorylase	AT3G46970	MAAIAVPLLAVRSPQANLQFPSIFNLNRPFSTSLFSNAFTHVKVSSTTSSSNQVVTETTCTSSSTISVQNDDALDTTLFVIRAKNRIGLLQIITRVFKVLGLKIEKAIIEFEGEFFVKKFYVNDSNGKKIEKVEYLEKIQKALLEAIDGDDGGAGVTAPSAVAVSGRGVVVRKPGLKMELGDRKAKVEKMFGLMDEFLKNDSISLQKDILDHVEFTVARSRFSFDDFEAYQALAHSVRDRLIERWHDTHQYFKKKDPKRIYFLSLEFLMGRSLTNSVTNLGIQDEYADALTQLGFDFEVLAEQEGDAALGNGGLARLAACQMDSLATLDYPAWGYGLRYQYGLFRQIIVDGFQHEQPDFWLNFGNPWEIERVHVSYPVKFYGTVEEEVLNGKKCKIWIP…	0	66.134	0	14.8957	14	42	14	1.371	37.05	10.3277	9	12	10.02	4.36941	4	4	16.59	7.94439	7	8	25.44	9.23535	8	10	18.29	5.56107	5	8	1	1	1	1	1	5	WTSP	Detected by both ITAG and Atlas
Solyc02g077990	30S ribosomal protein S5 (AHRD V1 ***- B6TT32_MAIZE); contains Interpro domain(s) IPR005712 Ribosomal protein S5, bacterial-type	AT2G33800	MAASSLSTFSSLSLRAPSRFSPFQSQPHHTFFIPKTIQSPFHLLLNPTKFDPIKPNSTTAETTFFDNTDPEEISTYDPPERPEDFIEPASFDDGPMESEEEIAKAYEELYGAAYSGETFLGNDIYAMDSKVKKTTSFGKTKKEKAKDGFDERVVQVRRVTKVVKGGKQLHFRAVVVVGDKKGQVGVGVGKAKEVIAAVQKSAVNARRNLITVPMTKYLTFPHRSEGDFGAARVMLRPAAPGTGVIAGGAVRIVLEMAGVENALGKQLGSNNALNNARATVVAVQQMRQFSEVAQERGIPMEELWK	0	64.587	0	33.7705	12	66	12	9	53.08	23.6066	7	17	52.43	27.2131	8	17	27.46	19.3443	5	10	27.54	20.9836	5	9	37.99	27.2131	8	13	1	1	1	1	1	5	WTSP	Detected by both ITAG and Atlas
Solyc02g078120	Eukaryotic translation initiation factor 3 subunit 7 (AHRD V1 ***- Q9FKV6_ARATH); contains Interpro domain(s) IPR007783 Eukaryotic translation initiation factor 3, subunit 7	AT4G20980	MAGFDLGSVPFNSDGWGPPDSSVSVPNQISNAPFAPFSRSDKLGRIADWTRSLSNRPGSNSKQNPTDSAFDFSGDDSFATLNADEDSSFRLVDTAAKSHHHGQHRPKFNPRWRFNPHNNRSQLPQRRDEEVEAKKREQEKERARRDRLYNLNRSGTNAGQRRESAVFKSSVDIQPEWNMLDQIPFSTFSKLSFSVPEPEDLLICGGLEFYDRSYDRITPKNERRLERFKNRNFFKITTTDDPVIRRLANEDKATVFATDTILSTLMCAPRSVYSWDIVVQRVGNKLFFDKRDGSQLDLLSVHETSQEPLPDVKDDINSAYSLSVEAAYINQNFSQQVLIRDGKKLSYDEPNPFATEGEEVASVGYRYRRWKLDDDTYLVARCEVQSVAEVNNQRSFLTL…	0.071	1.409	104	2.77296	1	1	1	0.096	2.87	2.77296	1	1	NA	0	NA	NA	NA	0	NA	NA	NA	0	NA	NA	NA	0	NA	NA	0	0	0	0	1	1	1 PSM	Atlas only
Solyc02g078240	2,3-bisphosphoglycerate-dependent phosphoglycerate mutase (AHRD V1 ***- GPMA_CYTH3); contains Interpro domain(s) IPR013078 Phosphoglycerate mutase	AT5G22620	MMTSRVIFTIPYFSFPSISNKSPYPKLIPDTSAPICYAICCSTSTPGLPVTTEILRNDTPLTGGAFDFENATTSLTKRVLASPKKVTIVRHGLSSWNEESRVQGSSNLSILSEKGTMQAERCKMALSDIHFDQCFSSPISRAKTTAEIIWKGKEEPLVFLDSLKEAHLFFLEGMKNEDAKRIYPKEYTTWREDPSKFCVDGVYPLQKLWGRAHEAWEEILLTPGEHFLVVTHKSILRALICTALGLGPERFRSVDINNGGLCVFKFNKEGEAMLQSLNMTAHMYTDHVYHY	0	6.536	0	8.24742	2	4	2	0.468	3.37	3.78007	1	1	3.47	4.46735	1	1	2.67	4.46735	1	1	2.65	4.46735	1	1	NA	0	NA	NA	0	1	1	1	1	4	WTSP	Detected by both ITAG and Atlas
Solyc02g078530	Receptor-like protein kinase At3g21340 IPR002290 Serine_threonine protein kinase	AT3G09010	MSCCFFGDRKKGHDLVHHDTRDAGGDSIASTKNFSFNELRLATNNFHQINKIGRGGFGTVYKGTLKQGKDVAVKTLAAESRQGLREFLTEIETISNVKHPNLVEIIGCCADGNNRILVYEYLENRSLDRALFGSRTSIKLEWEKRTTICLGTARGLAYLHEELVPHIVHRDIKASNILLDKDYTPKIGDFGLAKLFPDNITHISTKIAGTTGYLAPEYVLGGQLTMKADVYSFGVLILEAVSGKSSSSRIWQGDKRSLLEWSWRLYQEEKLLELVDEELDEFPEREVVRYIKTALFCTQANANRRPMMSQVIEMLSRDIQLNEKELTPPGFFEDSEGSVQSRLKISRGNTSQQSSVHITITQVTPR	0.041	1.478	103	3.55191	1	1	1	0.096	NA	0	NA	NA	NA	0	NA	NA	NA	0	NA	NA	NA	0	NA	NA	2.87	3.55191	1	1	1	0	0	0	0	1	1 PSM	ITAG only
Solyc02g078860	3&apos(2&apos) 5&apos-bisphosphate nucleotidase (AHRD V1 **** Q0WTT5_ARATH); contains Interpro domain(s) IPR006239 3(2),5 -bisphosphate nucleotidase HAL2	AT5G63980	MSSCTTSFSTKVSPTFRKNDIFLKKQMLGTISFSSKKDSYLGFTAQTSSQTDFVSAMDEDCKLELKSNYISDGYCKELEIAVRAVHMACLLCQRVQENLLSETSEHVHSKEDDSPVTIADWSVQAIVSWVLSEAYGSNVSIVAEEDVEALSKASAAGLLEAVVRTVNECLADAPRFGLKGPGTDLDAKAVLEAISRCSLAGARGSKFWVLDPVDGTLGFVRGDQYAIALALIEDGEPVLGVLGCPNYPMKKEWLSYQNGYRRILSRLSSSTSESSDRGSVLYARKGGGRAWMQPLLRGESKFVWPNAAREIRVSSIDNPALATFCEPVEKANSSHSFTAGLAHSVGLRNQPLRVYSMVKYAAIARGDAEIYMKFARAGYKEKIWDHAAGVLIIEEAGGV…	0	8.748	0	6.02679	2	3	2	0.186	3.99	4.01786	1	1	4.88	4.01786	1	1	1.88	2.00893	1	1	NA	0	NA	NA	NA	0	NA	NA	0	0	1	1	1	3	CIP	Detected by both ITAG and Atlas
Solyc02g079060	Eukaryotic translation initiation factor 3 subunit J IPR013906 Translation initiation factor eIF3 subunit	AT1G66070	MEDWEDIPVPDLLKKDQPTSKWDDEDADDDDVKESWEDEEEPAPAPKPEPPAEKAPKKSAAKAGEKKGKEVHTNEEPLDPVAEKLRQQRLVEEADYKSTAELFAKKGGDDKTLENFIPKSESDFLEYAELISHKLRPFEKSYHYIGLLKAVMRLSMTSLKGQDAKDIGSSITAFANEKIKAEKEATASKKKTGAKKKQLHVDKADDDAVVNAYDGYDDYDFM	0	5.647	0	6.75676	1	2	1	0.179	3.16	6.75676	1	1	3.56	6.75676	1	1	NA	0	NA	NA	NA	0	NA	NA	NA	0	NA	NA	0	0	0	1	1	2	1 Peptide	ITAG only
Solyc02g079210	DAG protein (AHRD V1 *-*- B6SJX7_MAIZE)	AT4G20020	MALYTSRLRRALPLSSSIFAQTFHQPNLISPIASLSQCTSTQSNLSKLNRFDFPSQWRLFRSSTISLSSRSRSFDRNPADDEIGPDTILFEGCDYEHWLIVIDFPKDTQLTREEMIETYVQTAAKVFGSVEEAKKKIYALSTTTYRGFQVLCSEDTSKKFEGLPGVVFVLPDSYIDPVNKEYGGDKYNNGEIIERPPPPQFQRQGSRPRRGPQYQQGNYRPPQQNYGPAQGHPPQQNYGAAQGPPPQQNYNAPQGPPPQQNYGPPRYPPPQQNYGSRQYAPPPQQNYRQPQDLSPQQNYERPQNPQPNQSYGVPQSVPSQWNHGLQPKFVPQQIYGPQGAGDHRGPAPPDSNLDAWDNSQVGWGDSIRSPFPRRDQRGGAPPEQGGFGGVQHYGSQQGG…	0.003	3.563	4	3.47826	1	2	1	0.179	NA	0	NA	NA	5.27	3.47826	1	2	NA	0	NA	NA	NA	0	NA	NA	NA	0	NA	NA	0	0	0	1	0	1	WTSP	Detected by both ITAG and Atlas
Solyc02g079250	3&apos(2&apos) 5&apos-bisphosphate nucleotidase-like protein (AHRD V1 **** Q682R6_ARATH); contains Interpro domain(s) IPR000760 Inositol monophosphatase	AT4G05090	MDLLRYSASRYPAAHLQLPFRTPLRRRFVAVRSSLSLPFAEQKAKYYSELEAAVDVVERACRLCVDVKKSLFSSDGRILEKNDQTPVTIADFGVQALVSLEMNKLFPSIPLVAEEDSAFLRSNNLVGSVVDVVKDKATLGDEVTEDNILKAIDRGGKDAYVFAPEPATYWILDPIDGTRGFVRGSEALYVVGLALVVEGKIVLGVMGCPNWHEDCSDNSIIGVQENQSSRSGIIMVSHVGCGTWTKRLSDILSNESPHTWTRCSVDSCQMVQGARVTIPESQAWKSLPLSGLFDAKTDSENIGEGNILLLSACCGSLCKYLMVASGRASVYIQGKKATSIIKVWDHAVGIICVHEAGGKES	0	57.905	0	21.3296	8	36	8	2.594	26.12	16.0665	5	7	19.09	17.1745	5	6	30.71	17.4515	7	9	32.66	21.3296	7	10	15.5	8.31025	3	4	1	1	1	1	1	5	WTSP	Detected by both ITAG and Atlas
Solyc02g079730	Thioredoxin family protein (AHRD V1 ***- B6TC88_MAIZE)	AT4G28590	MVIHSALNLNFCAISSLSALKAGQHCSSCSFSNFLLPPPLKRLTCFATSKKSEEEHVSDPKNNSGSRSRKAIRSRESKVTHNEDKDSAKIFPSTIPKKPRRGRRSEAAAVEDFVRDSLEKTFASIREQNSDMMKDTENILKDRVDDDTESDESSDDEDDSSRDKKEKKMIIEEEDPNWPLDADVGWGIRASEYFDKHPIKNVIGEDGVEIDWEGEIDDCWVKEINCLEWESFAFHPSPLIVLVFERYNRASDNWKALKELEKAAKVYWSAKERLPPRTVKIDINIERDLAYALKVKESPQILFLRGNRILYREKEIRTADDLVQMIAYFYYNAKKPSCIDDAALSQQSYTSQIKKEAVEHGSIPV	0.019	2.031	26	3.28767	1	1	1	0.155	2.74	3.28767	1	1	NA	0	NA	NA	NA	0	NA	NA	NA	0	NA	NA	NA	0	NA	NA	0	0	0	0	1	1	WTSP	Detected by both ITAG and Atlas
Solyc02g079770	DAG protein (AHRD V1 ***- B6TYI4_MAIZE)	AT1G11430	MAALKLPSFSKTLNPNSQFQNLPKTPTFLLSLSYPFLTTSLSSIPPSTSSRFPVVRAISDGEYSSKRSSNSDERETIMLPGCDYNHWLIVMEFPKDPAPTREQMIDTYLDTLATVLGSMEEAKKNMYAFSTTTYTGFQCTVSEETSEKFKGLPGVLWVLPDSYIDVKNKDYGGDKYINGEIIPCQYPTYQPKQANRTRSKSKAYVRRRDGPPPERTRRAAAPESSS	0	13.835	0	11.9469	2	11	2	1.154	7.28	11.9469	2	3	10.73	7.52212	1	3	6.59	7.52212	1	2	3.74	7.52212	1	1	6.3	7.52212	1	2	1	1	1	1	1	5	WTSP	Detected by both ITAG and Atlas
Solyc02g079950	Oxygen-evolving enhancer protein 3 (AHRD V1 ***- Q7Y1T5_PEA); contains Interpro domain(s) IPR008797 Photosystem II oxygen evolving complex protein PsbQ	AT4G05180	MAHAMASMGGLIGSSQTVLDGSLQLSGSARLSTVSTNRIALSRPGLTVRAQQGSVDIETSRRAMIGLVAAGLAGSVAKAAFAEARSIKVGPPPPPSGGLPGTLNSDEARDFSLPLKNRFYLQPLTPAEAAQRVKDSAKEIVSVKDFIDKKAWPYVQNDLRLRAEYLRYDLKTVISAMPKEQKGKLQDLSGKLFKTISDLDHAAKTKNSAEAQKYYAETVTTLNDVLANLG	0	88.739	0	44.3478	18	199	18	99	84.32	41.7391	14	39	50.72	29.5652	8	26	102.02	44.3478	14	50	114.36	41.3043	13	52	63.72	30	10	32	1	1	1	1	1	5	WTSP	Detected by both ITAG and Atlas
Solyc02g080220	Pectinesterase (AHRD V1 ***- B9RXQ4_RICCO); contains Interpro domain(s) IPR000070 Pectinesterase, catalytic	AT1G11580	MTTNYSSQPLLDSPKTKSSSSTKALYVLLSLAAIVGSVGFISIWAINRTSISLTTRVCDTAHDQPSCLAMLSEVAPAGLMDTKTVDLLQMVLHKSSLKIHETIHLASNVNGRINNGQEQVALEDCLELMDLSRDRLMDSMMGLGNLTAQAHFDVHSWLSSILTNHVTCIDGLNGQVRSIMEPMLNDLVARARTSLALMVAIAPQKNIVPTVSDGLPSWVSANDRRLLQLSANAIAANVVVAKDGSGKYKTVKEAVASAPDNSKTRYVIYVKKGIYKENVEIGKTKKNLMLVGDGMDATIITGNLNVIDGSTTFKSATVAAVGDGFIAQDIQFQNTAGPQKHQAVALRVGADQSVINRCKMDAFQDTLYTHTLRQFYRDCYITGTVDFIFGNAAVVFQNS…	0	8.191	0	4.37956	2	5	0	0.233	NA	0	NA	NA	3.44	2.55474	1	1	5.12	4.37956	2	2	4.91	4.37956	2	2	NA	0	NA	NA	0	1	1	1	0	3	WTSP	Detected by both ITAG and Atlas
Solyc02g080440	FeS assembly protein SufB (AHRD V1 ***- Q3MG36_ANAVT); contains Interpro domain(s) IPR010231 SUF system FeS cluster assembly, SufB	AT4G04770	MASLLTNGISHFCPQSIAEQPKLPKGYNFLPNSPGPKISNPGNFKIKAADAKATVEVPGKESSLSISNEGDPLQKFLKRDYKWGFNENIESFALPKGLSEDTIRLISSRKNEPEWMLEYRLKSYEKFVKMKEPKWSDNQYPEIDFQNICYYSEPKKKPTLDSLDEADPELVRYFDKLGIPLNERNRLANVAVDAVLDSVSIATTHRKTLEKSGVIFCSISEAIREYPDLVRKYLFRVVPPEDNFYAALNSAVFSDGSFVYIPKNTKCPMQISTYFRINAMETGQFERTLIVADEGSFVEYLEGCTAPSYDTNQLHAAVVELYCHEGAEIKYSTVQNWYAGDEEGRGGIYNFVTKRGICAGARSKISWTQVETGSAITWKYPSVVLEGDESVGEFYSVAL…	0	30.236	0	14.2857	6	12	4	0.701	8.12	5.86081	2	2	2.75	2.74725	1	1	6.63	5.49451	2	2	12.56	11.1722	5	5	4.98	4.21245	2	2	1	1	1	0	1	4	WTSP	Detected by both ITAG and Atlas
Solyc02g080540	ATP synthase gamma chain (AHRD V1 ***- B7FIR4_MEDTR); contains Interpro domain(s) IPR000131 ATPase, F1 complex, gamma subunit	AT4G04640	MSCSNLTMLVSSKPSLSESSALSFRSAVSSFQLPNHNLSGPSNPSRSSSVIPVRCGLRDLRDRIDSVKNTQKITEAMKLVAAAKVRRAQEAVVGARPFSETLVEVLYNINEQLQTDDIDVPLTKVRPVKKVALVVVTGDRGLCGGFNNYIIKKAEARIRDLKALGLDYTIISVGKKGNSYFLRRPYIPVDKFLEGSNLPTAKDAQAIADDVFSFFVSEEVDKVELLYTKFVSLVKSEPVIHTLLPLSPKGEICDINGNCVDAAEDEFFRLTTKEGKLTVERDVMRTKTTDFSAILQFEQDPVQILDALLPLYLNSQILRALQESLASELASRMSAMSSATDNASELKKNLSRVYNRQRQAKITGEILEIVAGADALV	0	119.247	0	32.3607	12	165	12	38.811	76.18	27.0557	10	24	125.15	32.3607	12	41	117.33	24.9337	10	36	105.5	29.1777	11	36	93.62	19.3634	8	28	1	1	1	1	1	5	WTSP	Detected by both ITAG and Atlas
Solyc02g080570	Glycogen synthase (AHRD V1 *-** D4ZXV2_SPIPL); contains Interpro domain(s) IPR011835 Glycogen/starch synthases, ADP-glucose type	AT1G11720	MDVPLPLHRPLSCTSVSNAITHLKIKPFLGFVSHGTTSLSVQSSSWRRDVMVTGVPFPFCANFSGRRRRKVSTPRSQQSSPKGFVPRKPSGMSTQRKVQKSNGDKESQSTSTSKESEISNQKTVEAKVETSDDDTKGVVRDHKFLEDEDEINGSTKSISMSPGRGSSQFVESEEIGDDDNDAVKLNESKRLEESDFLIDSVIREQSGSQGETNDSSKGSHAVGTKFYEILQVDVEPQQLKEINAGSVEYTGPVASKLLEITKASDVQHTESNEIDYLDSNSFFKSDLVEEDDPLTAGTVETGDSSLNLRLEIEANLRRQAIERLAEENLLQGIRLFCFPEVVKPDEDVEIFLNRGLSTLKNEPDVLIMGAFNEWRYRSFTTRLTETHLNGDWWSCTIHV…	0	150.602	0	23.8211	25	84	25	4.012	70.69	18.7805	20	27	52.7	12.1951	13	18	39.08	11.7886	11	13	41.3	11.3008	10	13	41.85	11.2195	10	13	1	1	1	1	1	5	WTSP	Detected by both ITAG and Atlas
Solyc02g080620	Prephenate dehydratase family protein (AHRD V1 **** D7KMI7_ARALY); contains Interpro domain(s) IPR001086 Prephenate dehydratase	AT1G11790	MALKLVPIWACCTNQQHCCTYPQSLKLGYGSRLSGSSFLNLRAHKKWECLVLLSETERAITPVEDEQPLAPPGDASVQEAQIIQSKGFHRDLQSLPKPLSATYLSSGQHDGSNVRVAYQGIPGAYSEAAALKAYPKCETVPCDQFEAAFKAVELWLVDKAVLPIENSVAGSIHRNYDLLLRHRLHIVGEVQLLVNHCLLGLPGIRKEELKRVVSHPQALEQCNIMLNELGVARLSSDDTSSAAQIVASEGKRDTGAVASARAAEIYGLSILAERIQDDPDNITRFLILAREPIISGTDRPYKTSIVFTLEEGPGVLFKALAVFALREINLTKIESRPQKKRPLRVVDDSNKGSAKYFDYLFYIDFEASMADPRAQYALEHLQEFARFIRVLGCYPMDKNL	0	7.291	0	8	3	7	2	0.245	1.86	1.75	1	1	1.81	1.75	1	1	4.08	4.25	2	2	0	1.75	1	1	2.72	5.5	2	2	1	0	1	0	0	2	WTSP	Atlas only
Solyc02g080630	Lactoylglutathione lyase (AHRD V1 ***- D2D330_GOSHI); contains Interpro domain(s) IPR004361 Glyoxalase I	AT1G11840	MGFSVFLFTFLLQHLLIFNHVFYLCSTDRCSNRFFTLPRLISLSLNLNMAEASAPAVPSTELLEWPKKDKRRMLHAVYRVGDLERTIKFYTECFGMKLLRQRDIPEEKYSNAFLGFGPEESHFVVELTYNYGVDKYDIGTGFGHFAIATPDVYKLVEEIKAKGGTVTREPGPVKGGSSVIAFVKDPDGYLFEIIQRESTPEPLCQVMLRVGDLERAIKFYEKALGMQVVKKVDRPEHKYTIAMMGYAPEKETTVIELTYNYGVTEYTKGNAYAQIAIGTDDVYKSAKVVNLAIQELGGKITRQPGSIPGLNTKITSFLDPDGWKTVLVDNKDFLKELESSK	0	12.707	0	11.7302	3	4	2	0.389	3.04	4.69208	1	1	7.05	3.51906	1	2	NA	0	NA	NA	2.46	3.51906	1	1	NA	0	NA	NA	0	1	0	1	0	2	Sporadic	Detected by both ITAG and Atlas
Solyc02g080640	Phosphoadenosine phosphosulfate reductase (AHRD V1 *-** B7I7M3_ACIB5); contains Interpro domain(s) IPR013766 Thioredoxin domain	AT4G21990	MALTFTSSSAIHGSLSSSSSSYEQPKVSQLGTFQPLDRPQLLSSTVLNSRRRSAVKPLYAEPKRNDSIVPSAATIVAPEVGESVEAEDFEKLAKELQNASPLEVMDKALEKFGDDIAIAFSGAEDVALIEYAHLTGRPYRVFSLDTGRLNPETYQLFDTVEKHYGIRIEYMFPDSVEVQALVRTKGLFSFYEDGHQECCRVRKVRPLRRALKGLRAWITGQRKDQSPGTRSEIPIVQVDPSFEGLDGGAGSLVKWNPVANVDGKDIWNFLRAMNVPVNSLHSQGYVSIGCEPCTRPVLPGQHEREGRWWWEDAKAKECGLHKGNIKDETVNGAAQTNGTATVADIFDTKDIVTLSKPGVENLVKLEDRREPWLVVLYAPWCQFCQAMEGSYVELAEKLA…	0	5.487	0	2.81996	1	3	0	0.155	3.13	2.81996	1	1	2.67	2.81996	1	1	NA	0	NA	NA	2.49	2.81996	1	1	NA	0	NA	NA	0	1	0	1	1	3	WTSP	Detected by both ITAG and Atlas
Solyc02g080780	Unknown Protein (AHRD V1)	AT1G62250	MLGLQNPQAISSCQSFLDTSVLHELIPCKSKNVNPSISNLSSATLVRSPAKGVSSCSFSWNWPNQLKTYKLSQQSASYRLLCRSQDATSPENEYRSSRNIAISLFRRYKNFLERGGGDNLKEFISAGVNAYALGCTDEGLRKELFSLKESGVEIEAMETYGGSTSLKSKILSVEVDECIMWLSIIFITILCTPQPTIVRWSSTSPVSDEMIVQWKGFCAIIANAYFVRGMAWLPVKTLQLEQMAVAGHAEEPSVVASRMRLVFTTLEVVSPQWPRG	0.002	4.36	3	4.34783	1	1	1	0.212	2.54	4.34783	1	1	NA	0	NA	NA	NA	0	NA	NA	NA	0	NA	NA	NA	0	NA	NA	0	0	0	0	1	1	WTSP	Detected by both ITAG and Atlas
Solyc02g080810	Aminomethyltransferase IPR006223 Glycine cleavage system T protein	AT1G11860	MRGGLWQLGQSITRRLAQADKKTIGRRCFASDADLKKTVLYDFHVVNGGKMVPFAGWSMPIQYKDSIMDSTVNCRENGSLFDVSHMCGLSLKGKDTIPFLEKLVVADVAGLAPGTGSLTVFTNEKGGAIDDSVVTKVTDDHIYLVVNAGCRDKDLAHIEEHMKSFKSKGGDVSWHIHDERSLLALQGPLAAPVLQYLTKDDLSKMYFGEFRVLDINGAPCFLTRTGYTGEDGFEISVPSENALDLAKALLEKSEGKIRLTGLGARDSLRLEAGLCLYGNDMEQHTTPVEAGLTWAIGKRRRAEGGFLGAEVILKQIEEGPKIRRVGFFSSGPPPRSHSEIQDSNGQNIGEITSGGFSPCLKKNIAMGYVKTGNHKTGTNVKIVIRGKSYDGVVTKMPFV…	0	107.147	0	26.3547	13	84	13	11.217	38.21	22.1675	8	13	99.98	26.3547	13	35	34.27	20.4433	7	11	62.24	24.1379	9	19	18.91	13.5468	4	6	1	1	1	1	1	5	CIP	ITAG only
Solyc02g080880	Aspartic proteinase (AHRD V1 **-* Q8L6A8_THECC); contains Interpro domain(s) IPR001461 Peptidase A1	AT1G62290	MQSIWYSYSPFSLFLDSSNCLVNMGVKAFLVAFFLSTLLFPLAFSTSNDGLVRIGLKKIKYDQNNRLAARLESKEAEALRASIRKYNFRGDLGVSEDTDIVALKNYMDAQYFGEIGVGTPPQKFTVIFDTGSSNLWVPSAKCYFSVPCLFHSKYKSSQSSTYKKNGTSAAIHYGTGAISGFFSQDNVKVGDLVVKNQEFIEATREPSVTFLVAKFDGILGLGFREISVGNAVPVWYNMVKQGLVKEPVFSFWLNRNKEEEKGGEIVFGGVDPKHFRGKHTYVPVTQKGYWQFDMGDVLIDGQATGYCDGGCSAIADSGTSLLAGPTTVITMINHAIGASGVVSQQCKTVVQQYGQTIMDMLLTEANPKKICSQVGLCTFDGTRGVSMGIESVVDEKAGK…	0	8.714	0	5.61798	3	7	3	0.318	2.02	1.31086	1	1	5.1	3.74532	2	2	0	1.87266	1	2	NA	0	NA	NA	4.92	3.74532	2	2	1	0	1	1	1	4	CIP	Atlas only
Solyc02g080940	Proline synthetase co-transcribed bacterial homolog protein (AHRD V1 **-- B5X4B5_SALSA); contains Interpro domain(s) IPR011078 Predicted pyridoxal phosphate-dependent enzyme, YBL036C type	AT1G11930	MAAASATDGVAATAVRSVIQRIEHVAERCGRRSDQVRLVAVSKTKPVSLLKQVYDAGHRCFGENYVKELIEKAPQLPDDIEWHFIGNLQSNKVKPLLTGVPNLAMVETVDDEKIANQLDRVAANIGRKPLKVFIQVNTSGEETKSGVEPDGCLELVKHVTSNCPNLEFCGLMTIGMPDYTSTPENFKTLAKCRSEVCEALGISEDQCELSMGMSGDFELAVEMGSTNVRVGSTIFGAREYPTK	0	8.276	0	9.0535	2	6	2	0.52	2.06	3.7037	1	1	NA	0	NA	NA	5.76	9.0535	2	2	7.64	9.0535	2	3	NA	0	NA	NA	0	1	1	0	1	3	CIP	Detected by both ITAG and Atlas
Solyc02g080980	Leucyl-tRNA synthetase IPR002302 Leucyl-tRNA synthetase, class Ia, bacterial_mitochondrial	AT4G04350	MYDLHVEQKESTSILVDNQAAIAISNNPVFHKKTKHFNIKFYFLREVQQRGEVTLVYTKTLPISKFELLRQKIGVCSIQSKEECKESVLNRSKFNFTVLYDIDAVSTKEPFKCVINQGIILGEVQYTACKDDEGNLISADSVDELAEYKQERIPEEKVMKSGDLFVLKDNPNIRLIARAHKMSKSRGNVINPDDVVLEYGADSLRLYEMFMGPLRDSKTWNTSGIDGVHRFLARSWRLVVGSASPTGSYLDGTVTVDEKPSIEQLRSLHRCIDKVTEEIEGTRFNTGISAMMEFINAAYKWDKLPRSIIEAFVLLLSPYAPHMAEELWSRLGHSNSLAYEPFPKADTAYLKESTVVLPVQINGKTRGTIQVEETCTEEEAFRLASFDTKLSKFLDGKSI…	0	37.006	0	19.7647	7	25	7	1.818	17.31	15.5294	5	6	18.24	12.4706	4	6	12.97	6.35294	2	4	12.1	12	4	4	15.39	14.5882	5	5	1	1	1	1	1	5	WTSP	ITAG only
Solyc02g080990	Leucyl-tRNA synthetase IPR002302 Leucyl-tRNA synthetase, class Ia, bacterial_mitochondrial	AT4G04350	MGEKGLWQQMDSWINGAGLHVGHPLGYTATDILARFKRMQGFNVLHPMGWDAFGLPAEQYAIDTGTHPKITTLRNISRFRSQLKSLGFSYDWDREISTTEPDYYKWTQWIFLQLLKRGLAYQAEVPVNWCPALGTVLANEEVIDGVSERGGHPVIRKPMRQWMLRITAYADRLLEDLDDLDWPESIKEMQRNWIGRSEGAELDFVVINGNSQEEEKRITVYTTRPDTIFGATYLVLAPEHPFLSSLVSEAQSKHVEEYREHAFRKSDLERTELQKEKTGVFTGCYAKNPANGQAVPIWVADYVLGSYGTGAIMAVPAHDTRDFEFAMKYTIPISWVVRPDDSNCGNFEKPYSGEGSMINSSYSESGLDINGLPSKEAASRVVQWLEKSGNGKKKVNYKL…	0	28.622	0	11.1111	6	15	6	2.162	7.41	6.2963	3	3	5.9	5.18519	3	3	8.24	7.03704	3	3	7.23	7.03704	3	3	8.87	6.2963	3	3	1	1	1	1	1	5	WTSP	ITAG only
Solyc02g081000	Leucyl-tRNA synthetase (AHRD V1 *-*- D5H7P2_SALRM); contains Interpro domain(s) IPR002302 Leucyl-tRNA synthetase, class Ia, bacterial/mitochondrial	AT4G04350	MNSGPNSLNRVSPAKPKPKHMLTLSKLLLINKLPPSNCQTTATSSLPFSPIAMPIQLHTSTRLHHLPSHLLPRPPLLRSALLLPACRRPLLRREFCNHERFGVSNCTKSSSKNTVTVLVNAIDGQKINEKHEKVKRAYPFHEIEPKWQHYWEENKTFRTPDEIDTSKPKFYVLDMFPYPRYGLFYSHSFNFKLLCAKDGLWSIFF	0	6.227	0	9.7561	2	3	2	0.359	5.81	9.7561	2	2	2.36	4.39024	1	1	NA	0	NA	NA	NA	0	NA	NA	NA	0	NA	NA	0	0	0	1	1	2	WTSP	Detected by both ITAG and Atlas
Solyc02g081160	Diphosphate-fructose-6-phosphate 1-phosphotransferase (AHRD V1 ***- D1JTA2_9BACE); contains Interpro domain(s) IPR011183 Pyrophosphate-dependent phosphofructokinase PfpB	AT4G04040	MAAAALSLLNNGELASSVKSPGTGRYAAVYSEVQNSRLDHPLPLPSVLGSPFKVVDGPPSSAAGHPEEIAKLFPSLYGQPSVSLVPDDSGDVAMNQILKIGVVLSGGQAPGGHNVISGIFDYLQTHCKGSTMYGFRGGPAGVMKGKYVGLTPEFIYPYRNQGGFDMICSGRDKIETPEQFKQAEETAKKLDLDGLVVIGGDDSNTNACLLAENFRSKNLKTRVIGCPKTIDGDLKSKEVPTSFGFDTACKIYAEMIGNVMVDARSTGKYYHFVRLMGRAASHITLECALQTHPNVTLIGEEVFAKKLTLKNVTDYIADVVCKRAESGYNYGVILIPEGLIDFIPEVQQLIAELNEILAHDVVDEAGVWKKKLTPQCLELFELLPLAIQEQLLLERDPHG…	0.004	3.279	5	2.10896	1	1	1	0.093	NA	0	NA	NA	NA	0	NA	NA	NA	0	NA	NA	2.06	2.10896	1	1	NA	0	NA	NA	0	1	0	0	0	1	1 PSM	Detected by both ITAG and Atlas
Solyc02g081170	Plastid-lipid-associated protein, chloroplastic (AHRD V1 **-- PAP_CITUN); contains Interpro domain(s) IPR006843 PAP fibrillin	AT4G04020	MASISSLNQIPCRTLQITSQYSKPTSKISTLPISSTNFPSKTELHRAISVKEFTYPKPKFTAQATNYDKEDEWGPEVEKISPGGVAVVDEEPPKEPSEIELLKKQLADSFYGTNRGLSASSETRAEIVELITQLESKNPNPAPTEALTLLNGKWILAYTSFSGLFPLLSRGNLLLVRVEEISQTIDSESFTVQNSVVFAGPLATTSISTNAKFEVRSPKRVQIKFEEGIIGTPQLTDSIVLPENVEFLGQKIDLSPFKGLITSVQDTASSVAKSISSQPPIKFPISNNNAQSWLLTTYLDDELRISRGDAGSVFVLIKEGSPLLKP	0	59.335	0	34.6626	11	100	11	4.456	69.08	23.6196	8	24	58.27	25.4601	8	23	51.25	22.3926	6	17	66.72	25.4601	7	22	43.8	25.7669	7	14	1	1	1	1	1	5	WTSP	Detected by both ITAG and Atlas
Solyc02g081400	Intracellular protease PfpI family protein expressed IPR006286 Peptidase C56, PfpI	AT3G02720	MANQKRVLLLCGDYVEDYEVMVPFQALLAYGLAVDAVCPGKKSGDICRTAVHQLYGHQTYSESRGHNFAVNATFDEIEATKYDGLFIPGGRAPEYLAMNEAVLDLVKSFANTKKPIVSVCHGQLILAAADVVRGRKCTAYPAVKPVLVAAGAHWEEPETLASCTIDGNLITGSTYEGNPDFIRLFVKALGGSIVGSGKRILFLCGDFMEDYEVKVPFQSLQALECHVDAVCPKKKAGEKCPTAVHDFEGDQTYSEKPGHDFTLNANFESVDVSSYDGLVIPGGRAPEYLALDDDVIKLVQEFMESKKPVASICHGQQILSAAGVLKGKKCTAYPAVKLNVILGGATWLEPEPIDRCFTDGHLVTGAAWPGHPEFISQFMALLGVHVKF	0	8.521	0	7.47423	2	2	2	0.468	3.48	3.35052	1	1	2.65	4.12371	1	1	NA	0	NA	NA	NA	0	NA	NA	NA	0	NA	NA	0	0	0	1	1	2	Sporadic	ITAG only
Solyc02g081700	Proteasome subunit alpha type IPR001353 Proteasome, subunit alpha_beta	AT4G15165	MSRRYDSRTTIFSPEGRLYQVEYAMEAIGNAGSAIGILSKDGVVLVGEKKVTSKLLQTSTSSEKMYKIDDHVACAVAGIMSDANILINTARFQAQRYTFAYQEPMPVEQLVQSLCDTKQGYTQFGGLRPFGVSFLFAGWDKNYGFQLYMSDPSGNYGGWKAAAIGANNQAAQSILKQDYKDDITREEAVQLALKVLGKTMDSTSLTSEKLELAEVFLSNGKVKYQACSPETLNKMLVSAGLTQPTVEE	0	5.882	0	6.45161	1	1	1	0.292	NA	0	NA	NA	3.06	6.45161	1	1	NA	0	NA	NA	NA	0	NA	NA	NA	0	NA	NA	0	0	0	1	0	1	1 PSM	ITAG only
Solyc02g081810	tRNA pseudouridine synthase B IPR004802 Pseudouridine synthase, putative	AT3G57150	MTDVELSRSEKKKKKSKSGKNDDETQTLSTPIDGDFLIKPQSYTPTIDTSEWPILLKNYDRLNVRTGHYTPLPSGFSPLKRPLAEYIRYGILNLDKPANPSSHEVVAWIKRILRVEKTGHSGTLDPKVTGNLIVCIDRATRLVKSQQGAGKEYVCVARLHSDVPDVAKVARALEALTGAVFQRPPLISAVKRQLRIRTIYESKLLEYDAERHLVVFWISCEAGTYVRTLCVHLGLLLGVGGHMQELRRVRSGILGEKNNMVTMHDVMDAQWMYDNYRDETYLRRVIMPLEVVLTSYKRLVVKDSAVNAICYGAKLMIPGLLRFENDIEVGEEVVLMTTKGEAIALGIAEMTTAVMGTCDHGVVAKIKRVVMDRDTYPRKWGLGPRASMKKKLVAEGKLD…	0	10.02	0	5.02513	2	3	2	0.077	NA	0	NA	NA	NA	0	NA	NA	NA	0	NA	NA	5.72	5.02513	2	2	3.41	2.84757	1	1	1	1	0	0	0	2	Sporadic	ITAG only
Solyc02g081910	DNA topoisomerase (AHRD V1 **** B9SPT5_RICCO); contains Interpro domain(s) IPR005733 DNA topoisomerase I, bacterial-type	AT4G31210	MALVQQLLTTASTSCRSIMLQNRTLHNYQANCLQCSTFATVDSFEKMSRKARICCGIRARQPRNLRVVSQQKIHPLRSYYTNEPGSSSAFSVLQLSKEGFPSTPMPIIFSFRPFGGIGSRSYNTDGKMHFSRDARAIADKGSGGAKVFSDGNKTFFKNLKNHSERSNELAVHRRNALSDKVTEKGTPNSKVSASKNVDLVISKDTPVKTDEKDVNLDISGIPLGNNGKPTSTGSEKTKKQSRSKKDKNVSSATVDQPKASKTRRAKKPSPAKDEESPAVSEISSPVHSSSVGPADNVSMKVDLAQVKRTSPRKRKPTKVSNSVAELNGATVVPSDSKLVTDKSSDVSSKSKPPGQKKWPKLYPPTAKSVLVVESVTKARVIQGYLGDMFEVLPSYGHVR…	0.074	1.393	108	1.2766	1	1	1	0.038	2.39	1.2766	1	1	NA	0	NA	NA	NA	0	NA	NA	NA	0	NA	NA	NA	0	NA	NA	0	0	0	0	1	1	WTSP	Detected by both ITAG and Atlas
Solyc02g081920	Plastid ribulose-1 5 bisphosphate carboxylase/oxygenase large subunit N-methyltransferase-related protein (Fragment) (AHRD V1 *-*- A7KWL3_ARALP); contains Interpro domain(s) IPR001214 SET	AT4G20130	MVSSTILIQQPTNFFHQPELHHQLWRGLQHGCVASLQKQPILVCNSNKRNRPLRVSSSANGAVTSSTLEAYDSSPSPSAFPLFTPPSQPQDTPASQLELADPDFYKIGYVRSFRAYGIEFREGPDGYGVFASKDVEPLRRARVIMEIPLELMLTISKKLPWMFFPDIIPVGHPVFDIINSTNPETDSDLRLACLLLYAFDCKDNFWQLYGDFLPSADECTSFLLATEEDLLELQDEKLASTMREQQNRALEFWEKNWHSAVPLKIKRLAQDPERFIWAMSIAQSRCISMQTRIGSLVQEANMLVPYADMMNHSFQPNCFFHWRFKDRMLEVMINAGQKIRKGDEMTVNYMAGQKNDLFMQRYGFSSPVNPWDVIHFTGDAKIHLDTFLSVFNISGLPGE…	0	14.401	0	8.6444	5	5	5	0.688	10.63	8.6444	5	5	NA	0	NA	NA	NA	0	NA	NA	NA	0	NA	NA	NA	0	NA	NA	0	0	0	0	1	1	WTSP	Detected by both ITAG and Atlas
Solyc02g081980	Ectonucleoside triphosphate diphosphohydrolase 6 IPR000407 Nucleoside phosphatase GDA1_CD39	AT3G04080	MLLILVGLPLSSHANDYSEKYAVIFDAGSTGSRVHVFRFNSNLDLINIGNDLELFLAIKPGLSSYADDPKAAANSLKPLLEKAEAVIPKNLQSQTPIKVGATAGLRLLKGDSSEKILQAVRDMLKNETTLSYKDEWVSVLEGTLEGSYFWVALNYLYGNLGKNYPDTIATIDLGGGSVQIAYAVSKQSAINAPKLPNGDAYVQQKALLGTNYYLYVHSFLNYGLLAARADILKASKNYTSPCIVEGHNGYYTYNGVSYKAASRKQGPNIRRCKAIIRKLLQIDAPCNHKNCSFAGIWNGGGGAGTKNLYISSFFYDYASTVGIVDPKEAYGITQPIQYYKAATLACKTKKQNMKSVFPNINDKDIPFICMDLLYEYTLLVNGFGIDPIRKITVVHQVNY…	0.002	3.201	5	2.30415	1	1	1	0.145	NA	0	NA	NA	2.83	2.30415	1	1	NA	0	NA	NA	NA	0	NA	NA	NA	0	NA	NA	0	0	0	1	0	1	1 PSM	ITAG only
Solyc02g082000	30S ribosomal protein S19 IPR005713 Ribosomal protein S15, eukaryotic_archaeal	AT1G04270	MAEVEADVATGQPRKRTFKKFSYRGVDLDSLLDMSTDELVKLYPARPRRRFQRGLKRKPMALIKKLRKAKREAPPGEKPEVVRTHLRNMIIVPEMIGSVIGIYNGKTFNQIEVKPEMISHYLAEFSISYKPVKHGRPGIGATHSSRFIPLK	0	5.355	0	11.2583	1	1	1	0.468	NA	0	NA	NA	4.12	11.2583	1	1	NA	0	NA	NA	NA	0	NA	NA	NA	0	NA	NA	0	0	0	1	0	1	1 PSM	ITAG only
Solyc02g082200	Glutaredoxin (AHRD V1 ***- A9LC71_PTEVI); contains Interpro domain(s) IPR004480 Glutaredoxin-related protein	AT3G54900	MSLGISLQWQLPSVIRSTTTSAAQRTTDVFLSFPTVHSGRALQSSAIPSSSIATGKRDGRLRSLRCLSALDPNLKSTLDKVVTSQKIVLFMKGTKEFPQCGFSNTVVQILKALNAPFETLNILENEALRQGLKEYSSWPTFPQLYIDGEFFGGCDIVVEAYKSGELQELLERTLCS	0	11.891	0	11.9318	2	10	2	1.154	6	6.25	1	2	9.73	11.9318	2	3	6.79	11.9318	2	2	3.05	5.68182	1	1	5.81	11.9318	2	2	1	1	1	1	1	5	WTSP	Detected by both ITAG and Atlas
Solyc02g082250	Thioredoxin reductase IPR005982 Thioredoxin reductase	AT4G35460	MTGNCWPKLINTFKKACNLIPVATLTTTAAANSPKFSSMDDIHKTLKTSVCIIGSGPAAHTAAIYAARAELKPILFEGWMANDIAPGGQLTTTTDVENFPGFPEGIGGGELMEKCRAQSVRFGTQIYTETVTKVDFSKSPFKVVSDDRTVLADAVILATGAVAKRLEFPGSGNNGFWNKGISACAVCDGAAPIFRNKPLAVIGGGDSAMEEANFLTKYGSKVYIIHRRDEFRASKIMQNRALSNPKIEVIWNSTVVEAYGEKLLGGLKVKNIVTGEVSDLNVSGLFFAIGHVPATKFLDKQLELDSDGYVVTKPGTTLTSVRGVFAAGDVQDKKYRQAITAAGSGCMAALDAEHYLQEIGAQVGKSD	0	6.048	0	4.35967	1	1	1	0.179	NA	0	NA	NA	3.52	4.35967	1	1	NA	0	NA	NA	NA	0	NA	NA	NA	0	NA	NA	0	0	0	1	0	1	1 PSM	ITAG only
Solyc02g082700	High mobility group protein IPR000910 High mobility group, HMG1_HMG2	AT4G35570	MKGAKSKAKADTKLGVRKKATESKKAKNAAKDPNKPKRPPSAFFVFMEEFRKTYKEKHPNNKSVAVVGKAGGDKWKQLSDEEKAPYQAKAEKRKAEYQKSMDAYNKKLAAGDADDESDKSKSEVHDDDEDDDGSEEEDDD	0	6.156	0	19.2857	2	3	2	0.931	2.88	9.28571	1	1	7.31	10	1	2	NA	0	NA	NA	NA	0	NA	NA	NA	0	NA	NA	0	0	0	1	1	2	Sporadic	ITAG only
Solyc02g082760	Catalase (AHRD V1 **** O24511_TOBAC); contains Interpro domain(s) IPR018028 Catalase related subgroup	AT4G35090	MDPYKYRPSSAFNSPFCTTNSGAPVFNNNSSLTVGARGPVLLEDYHLVEKLANFDRERIAERVVHARGASAKGFFEVTHDIAHLTCADFLRAPGVQTPVIVRFSTVIHERGSPETLRDPRGFAVKFYTREGNFDLVGNNFPVFFIRDGMKFPDMVHALKPNPKSHIQENWRVLDFFSHHPESLHMFTFLFDDIGIPQDYRHMDGSGVHTFTLINRAGKSTYVKFHWKPTCGVKSLLEEEAIRVGGANHSHATQDLYDSIAAGNYPEWKLFIQIMDPEHEDKFDFDPLDVTKTWPEDILPLQPVGRLVLNKNIDNFFNENEQLAFCPSIVVPGVYYSDDKMLQTRIFSYSDTQRYRLGPNYLQLPANAPKCAHHNNHYDGSMNFMHRDEEIDYFPSRYDQ…	0	97.174	0	27.8455	12	79	8	8.047	66.36	23.9837	10	21	64.55	27.8455	12	24	34.43	18.2927	7	12	33.51	14.0244	5	13	27.79	16.2602	6	9	1	1	1	1	1	5	CIP	Detected by both ITAG and Atlas
Solyc02g082830	Phosphoserine aminotransferase (AHRD V1 **** B9H657_POPTR); contains Interpro domain(s) IPR003248 Phosphoserine aminotransferase	AT4G35630	MAMSAATTQSFLLNNKTTRHNYQTLKSATHIATFPSTTTLTSTYKSMSISCSAAASTTTTPLQTPPTTSSDRVFNFAAGPATLPENVLQKAQADLVNWRGSGMSVMEMSHRGKEFLSIIQKAESDLRTLLNISDEYAVLFLQGGATTQFAAIPLNICSPDDAVDYIVTGSWGDKAFKEAAKYSKPNVIWSGKSEKYTKIPNFDSLVQNPDAKYLHICANETIHGVEFKDYPTPLNEKTILVADMSSNFCSKPVDVSKFGIIYAGAQKNVGPSGVTIVIIRKDLIGNAQESTPVMLDYKIHAENNSLYNTPPCYGIYMCGLVFEDLLDQGGLVEVEKKNQKKAQILYDAIDSSNGFYRCPVDKSVRSLMNVPFTLAKPELEAEFVKTAAGEKMVQLKGHR…	0	64.542	0	26.1574	11	75	10	5.158	56.23	26.1574	11	21	48.08	25.9259	10	18	31.81	16.8981	6	15	30.75	19.9074	7	13	17.87	13.8889	5	8	1	1	1	1	1	5	WTSP	Detected by both ITAG and Atlas
Solyc02g082870	Acyl-CoA synthetase/AMP-acid ligase II (AHRD V1 **** Q2W3Z0_MAGSA); contains Interpro domain(s) IPR000873 AMP-dependent synthetase and ligase	AT2G17650	MSYSGVTRNFICSINSVQIESTSIHQKRRHYMCMQVSMDLQTESSRGLLKCSAANYVPLTPISFLERAANAFRGRTSIIDGTSVKYNWEETYDRCIKLASALSELGISRGDMVATLARNVYAMQELHFAVPMAGGVICTLNTRHDSAMLSVLLKHSEAKVIFVDQHMLQLAQGALDILVNEKVTPPLLVVISESENSYSTIVNSNSYEYESLLESGNSEFSVRWPTSELDPISVNYTSGTTSRPKGVVYSHRGAYLNAIATFLLHEMSSWPVYLWTVPTFHCNGWCLTWGLAALGGTSICLRQVYPKDIFENIAEHKVTHMSGAPTVLNMLVNSPVSDRKPLPHSVNIMTGGSPPPPQIICSMEELGFRVHHLYGLTETYGPGTYNLWRPEWDSLPPNE…	0	5.971	0	2.70728	1	2	1	0.116	3.53	2.70728	1	1	3.02	2.70728	1	1	NA	0	NA	NA	NA	0	NA	NA	NA	0	NA	NA	0	0	0	1	1	2	1 Peptide	Detected by both ITAG and Atlas
Solyc02g082920	Endochitinase (Chitinase) IPR000726 Glycoside hydrolase, family 19, catalytic	no hits	MKFNIVSPVALSCLFFLFLTGTLAQNAGSIVTRELFEQMLSFRNNDACPAKGFYTYDAFIAAANSFPGFGTAGDDTARKKEIAAFFGQTSHETNGGSAGTFTGGYCFVKQIEQSDRYYGRGPIQLTHQSNYERAGQGIGVGQELVNNPDLVATDPIISFKTAIWFWMTEQDNKPSCHNVIIGQWTPSPKDTAANRVPGYGVITNIINGQFECGMGPNTAAESRIGFYRRYCGMLNVPTGENLDCNNQKNFAQG	0	12.408	0	9.09091	2	4	2	2.981	NA	0	NA	NA	10	9.09091	2	3	NA	0	NA	NA	3.67	5.13834	1	1	NA	0	NA	NA	0	1	0	1	0	2	Sporadic	ITAG only
Solyc02g082930	Endochitinase (Chitinase) IPR016283 Glycoside hydrolase, family 19 IPR000726 Glycoside hydrolase, family 19, catalytic	no hits	MVLCCVFLLFLTGSFAQDVGTIVTSDLFNEMLKNRNDDRCPAKGFYTYDAFIAAANSFPGFGTTGDDTARKKEIAAFFGQTSHETTGGSLSADGPFAGGYCFVREGNQMGSGFYGRGPIQLTGQSNYDLAGQAIGQDLVNNPDLVATDATVSFKTAIWFWMTAQGNKPSCHDVITGQWTPSAADASANRQPGYGVITNIINGGIECGKGQNPQVEDRIGFYRRYCTILNVAPGDNLDCYDQRNFAEA	0	4.971	0	4.8583	1	2	1	1.154	2.8	4.8583	1	1	3.29	4.8583	1	1	NA	0	NA	NA	NA	0	NA	NA	NA	0	NA	NA	0	0	0	1	1	2	1 Peptide	ITAG only
Solyc02g083270	Vitamin K epoxide reductase (AHRD V1 **-- B4AXQ4_9CHRO); contains Interpro domain(s) IPR012932 Vitamin K epoxide reductase	AT4G35760	MASIIGVSSSPFPTQTSHLLPSRSNSISSLVQLKRDSVRRLLLLRVNCSSRQVGDAETESESKVVLPDTPADTGISAYNWCAALGGIGFLETSYLTFLKLTNSAAFCPVGDGASCGDILNSSYSAVFGVPLPLIGMVAYGVVAILGIQLGQKSRPLGTGEANGRLVLLGTTTSMAAASAYFLYILSTKFTGEFCPYCLASVLLSFSLFISSMKGLGFQEVQKDVGIQLLIVLLVVSTLNNSYSDSQPTNTGSALAEMEYFTAEITSESTPFAISLAKHLHSIGAKMYGAFWCSHCQEQKQMFGREAAKLLDYVECFPYGLKRGISMINACQEAKLEGFPTWVINGEVLSGEKKLSELAALSGFDMKEELTEAK	0	15.863	0	5.63003	3	5	3	1.154	NA	0	NA	NA	3.44	3.48525	1	1	NA	0	NA	NA	13.43	5.63003	3	4	NA	0	NA	NA	0	1	0	1	0	2	WTSP	Detected by both ITAG and Atlas
Solyc02g083280	Thiosulfate sulfurtransferase/rhodanese-like domain-containing protein 1 (AHRD V1 *--* TSTD1_HUMAN); contains Interpro domain(s) IPR001763 Rhodanese-like	AT4G35770	MRTISLHSTSFSLVEFHGTKNLAQSRINRSVSLIPMARSQFQPKIRRDIGTSNRNPSFSWMATVGEKVHNSTVPTSVPVRVALELLQAGHRYLDVRTTEEYNDGHAAGAINIPYMLRIGSGMIKNPNFLEEVLEQFGKDDEIIVGCQLGKRSFMAATELLAAGFTGVTDIAGGYAAWTESGLPIES	0	22.292	0	20.4301	3	49	3	1.848	34.49	20.4301	3	11	36.06	20.4301	3	11	15.63	12.9032	2	7	26.99	12.9032	2	12	18.03	12.9032	2	8	1	1	1	1	1	5	WTSP	Detected by both ITAG and Atlas
Solyc02g083410	Receptor-like kinase (AHRD V1 *-*- A7VM40_MARPO); contains Interpro domain(s) IPR002290 Serine/threonine protein kinase	AT3G09580	MPPCLCLPATLPHPSSTLFSTRRRFPLLKPPYASSNIPVGSTSQPNTTGVIVIGGGLAGLAAAIRLQADNIPFLLLEASDAVGGRVRSDVVDGYTLDRGFQIFITGYPEARKVLDYDSLDLRKFYSGAQVYYGGRFHTVADPLRHFADALQSLTNPIGSVVDKLLIGLTRLKVLTQGDDEILSADEEPTMNLLKKIGFSDAILERFFRPFFGGIFFDRELETTSRLFNFIFKCLALGDNTLPAKGIAAIPEQLAAKLPSNSILFNTRVVSVDSGSDSSTKIRVTLQNGEMLESEFGVILAVEEPEAVKLLAGEKTGEVRQPVRSTVCLYFSADQGKVPVQDPVLLLNGSGKGIVNNMFFATNVAPSYAPAGKALVSVTLVGLYGDVADEDLVDRVVKEL…	0	73.594	0	15.7497	16	82	16	2.621	43.96	9.16936	11	16	67.19	14.5631	15	25	35.26	10.4639	10	14	36.65	8.09061	8	15	30.66	9.81661	10	12	1	1	1	1	1	5	WTSP	Detected by both ITAG and Atlas
Solyc02g083500	Genomic DNA chromosome 5 TAC clone K2A18 (AHRD V1 ***- Q9FKX3_ARATH); contains Interpro domain(s) IPR006016 UspA	AT5G66090	MAFAHCFLTVPADTTNFHTATSILTRPFSSSVSSSFSSSNLKTCSLSNFHKNLRIGLKVSVKAQASEDSAAADAFTNFKHVLLPITDRNPYLSEGSRQAAATAAAMAKKYGADITVVVIDEKGKEAYPEHETQLASIRWHLAEGGYQEFKLLERLGEGSKPTAIIGEIADDMNLDMVVMSMEAIHSKHVDANLLAEFIPCPVLLLPL	0	85.094	0	42.5121	9	97	9	132.352	81.17	38.1643	8	25	68.9	42.5121	9	22	61.45	41.5459	8	21	60.42	41.5459	7	20	28.89	32.8502	6	9	1	1	1	1	1	5	WTSP	Detected by both ITAG and Atlas
Solyc02g083590	Dehydroquinate synthase (AHRD V1 ***- Q8RU74_SOLLC); contains Interpro domain(s) IPR016037 3-dehydroquinate synthase AroB, subgroup	AT5G66120	MASSFCPKQALSFTNSTHQLHQSRAIPRDIHVRFPAPVSSPSSRCGLKSKATTRLKVLATSATKVMDHSSSKASSQAPTVVEVDLGTRSYPIYIGAGLLDQPDLLQRHIHGKRVLVVTNTTVAPLYLDKTISALTDGNPNVTVESVILPDGEQFKNMETLMKVFDKAIESRLDRRCTFVALGGGVIGDMCGYAAASYLRGVNFIQIPTTVMAQVDSSVGGKTGINHPLGKNMIGAFYQPQCVLIDTDTLNTLPDRELASGLAEVIKYGLIRDAEFFEWQEQNMPLLLARDPTAFTYAIKRSCENKADVVSQDEKESGVRATLNLGHTFGHAVETGVGYGQWLHGEAVAAGTVMAVDMSRRLGWIDDSLVQRVQKILQQAKLPTSPPETMTVEMFKSIMA…	0	55.582	0	26.6968	12	48	12	4.275	32.3	20.5882	8	10	28.49	19.2308	8	9	32.45	24.4344	11	11	22.55	19.0045	8	8	25.96	20.8145	9	10	1	1	1	1	1	5	WTSP	Detected by both ITAG and Atlas
Solyc02g083610	BZIP transcription factor (AHRD V1 *-*- D3YBE4_TRIRP); contains Interpro domain(s) IPR006867 Protein of unknown function DUF632	no hits	MGCWYSRLEREELVSRCKARKRYMKQLVKSRQAFSASHSMYLRSLRNTGSALLQFATGETDLHPQNHHLPPLPPSPPRRLTTPHPPPPPPPPPPPMSPTSWTTSTTTSSALPPPPPPPPPPPPPATSNWDFWDPFVPPPSSSRSVTEEEWDETTITSEAAVTTTVGAASVAAPPSAVSQFSKETTSTSELAVVVSTKGKDLVEIIKELDEYFLNAADAGAQLSLLLEVPNCAFSEQRSSDKLMSPFSWSFGGSSRWNGIGRFCDDPMNKSINGVNGAKAASHCSTVERLYAWEKKLYLEVKHAEALKLEHEKRGGHARKLEMKRADYVKTEKAKKEVEKLESQMMVAAQAIETTSAEIIKLRESELYPQLVDLVKGLMYMWRSMYECHHVQTHIVQQLK…	0.008	2.725	10	1.41287	1	7	1	0.105	NA	0	NA	NA	2.15	1.41287	1	1	6.88	1.41287	1	3	2.18	1.41287	1	1	4.38	1.41287	1	2	1	1	1	1	0	4	1 Peptide	Detected by both ITAG and Atlas
Solyc02g083750	Transcription regulator IPR007592 Protein of unknown function DUF573	AT5G28040	MASVEDQAVVYNDDDLDDEEDDEESGHPQNEAVVDEDDDVDVDEEEEEEDDSTSSPPVPVANHSVAGEVTIAVVGVPATDSLCIEPKRERINDFGVTPATMVVEEKKPLVLDDSRKLFQRLWMDEDEIELLQGFLEYTTQRGGINSSSHHHHDTGAFYDQIKNKLQLDFNKNQLVEKLRRLKKKYRTVMSKMGSGKEFVFKSPHDQATFEISRKIWSNAGPIVVRSSGPPPPPPADDGGFDDEDSHLNLNHANFIDHTPNFNLNPNGFDVKTSKSKKRPRGGEEKPGYIQQYYHQSSGGGTNVILPPTPVSMAAPQATATATAAASIPSLIEETVRSCLSPIFKELFNNLNGSRYSGFGMSLGPSPLVGFGNSLMSCDINMKTDEKWRKQQILELEVYS…	0	10.395	0	6.65083	2	2	2	0.52	NA	0	NA	NA	5.56	6.65083	2	2	NA	0	NA	NA	NA	0	NA	NA	NA	0	NA	NA	0	0	0	1	0	1	Sporadic	ITAG only
Solyc02g083810	Ferredoxin--NADP reductase (AHRD V1 ***- D7MN04_ARALY); contains Interpro domain(s) IPR012146 Ferredoxin--NADP reductase	AT1G20020	MATAVSAAVSLPSSKSTSFSSRNSIISTDKINFNKVPLYYRNVSGASRLVSIRAQVTTEAPAKVEKISKKQEEGVIVNKFRPKEPYVGRCLLNTKITGDDAPGETWHMVFSTEGEVPYREGQSIGVIADGVDANGKPHKLRLYSIASSALGDFGDSKTHMFPCVSRGLCTPMTKGKKLKEFAQTSYVYPFYFSDLKPGAEVKITGPVGKEMLMPKDPNATVIMLATGTGIAPFRSFLWKMFFEKHEDYKFNGTAWLFLGVPTSSSLLYKEEFEKMKEKAPENFRLDFAVSREQTNEKGEKMYIQTRMAQYAEELWTLLQKDNTFIYMCGLKGMEQGIDEIMSSLAERDGIVWADYKKQLKKAEQWNVEVY	0	195.417	0	47.2973	20	395	11	42.652	296.63	43.5135	15	106	326.14	45.6757	17	112	179.73	42.973	14	55	212.11	44.3243	16	69	165.88	42.4324	16	53	1	1	1	1	1	5	WTSP	Detected by both ITAG and Atlas
Solyc02g084440	Fructose-bisphosphate aldolase (AHRD V1 ***- Q9SXX4_NICPA); contains Interpro domain(s) IPR000741 Fructose-bisphosphate aldolase, class-I	AT2G21330	MASASLLKTSPVLDKTEFVKGQSLRLPSVSVRCQPSALTVRASSYADELVKTAKTIASPGRGILAMDESNATCGKRLASIGMENTEANRQAFRTLLVSVPGLGEYISGAILFEETLYQSTVEGKKMVDVLVEQNIVPGIKVDKGLVPLAGSNNESWCQGLDGLASRSAAYYQQGARFAKWRTVVSIPNGPSALAVKEAAWGLARYAAISQDNGLVPIVEPEILLDGEHNIDRTFEVAKQVWAEVFFYLAQNNVMFEGILLKPSMVTPGAECKDRATPQQVADYTLSLLRQRIPPAVPGIMFLSGGQSEVEATLNLNAMNQSPNPWHVSFSYARALQNTCLKTWSGRPENVKAAQDALLVRAKANSLAQLGKYTGEGESDEAKKGMFVKGYVY	0	156.749	0	39.7959	19	316	10	41.813	232.77	34.6939	15	92	177.92	35.9694	15	70	149.88	32.9082	15	56	145.15	33.4184	16	52	122.05	31.8878	13	46	1	1	1	1	1	5	WTSP	Detected by both ITAG and Atlas
Solyc02g084660	Glutaredoxin I (AHRD V1 *-*- O65169_MESCR); contains Interpro domain(s) IPR011899 Glutaredoxin, eukaryotic and viruses	AT1G77370	MQINPAGRLTKIGNRRFGQYYNLSTKSVFRFSTPKTGISPKLPLLICNRLEKIGSINLRISAETLKPLFLSILSKTQQFFERSTVPVIEREKMEVNGCFKRNLLLMFTVFGVMAIVKGPTEALASSSPSAFVQNVIYSNKIAIFSKSYCPYCKRAKGIFNELQEQPFVVELDLRDDGARIQDVLLDLVGRSTVPQVFVNGKHIGGSDDLRNAVESGRLQSLLKKE	0.001	4.491	1	4.88889	1	3	1	0.145	2.73	4.88889	1	1	2.91	4.88889	1	1	NA	0	NA	NA	2.33	4.88889	1	1	NA	0	NA	NA	0	1	0	1	1	3	1 Peptide	Detected by both ITAG and Atlas
Solyc02g084750	(Dimethylallyl)adenosine tRNA methylthiotransferase miaB (AHRD V1 ***- MIAB_SALRD); contains Interpro domain(s) IPR006463 tRNA-i(6)A37 modification enzyme MiaB	AT4G36390	MASSLSSLSTMLSQPHCAVRIKFPKQYSVRFLSSKLLEVQSTSSRRTSVSLGRSSTFSIKISRNFSQCHSRTSLTSKNQIPTLRDFIPKATQTVSSSDVQQESVMISDVMPRGRIYHETYGCQMNVNDMEIVLSIMKNAGYTESVEVPENAEIIFINTCAIRDNAELKVWQRLNYFWFLKRQWKSNVASGRSQSAHPPKVVVLGCMAERLKDKILDADKMVDVVCGPDAYRDLPRLLEEVDYGQKGINTLLSLEETYADINPVRISKNSISAFVSVMRGCNNMCSFCIVPFTRGRERSRPVESIVKEVAELWKEGVKEVTLLGQNVNSYNDTSGVENPDEPAVSWELSDGFSSMFKVKHVGLRFADLLDRLAIEFPEMRFRYTSPHPKDFPDDLLYVMR…	0.013	2.267	17	1.44462	1	1	1	0.07	1.76	1.44462	1	1	NA	0	NA	NA	NA	0	NA	NA	NA	0	NA	NA	NA	0	NA	NA	0	0	0	0	1	1	WTSP	Detected by both ITAG and Atlas
Solyc02g084800	Peroxidase (AHRD V1 ***- Q0ZA68_9ROSI); contains Interpro domain(s) IPR002016 Haem peroxidase, plant/fungal/bacterial	AT3G50990	MAASLLRLHFHDCFVKGCDASLLLDSRGSIVTEKRSNPNRNSARGFDVIDDIKSALEKECPQTVSCADILALAARDSTVLAGGPNWEVPLGRRDSRSASLSGSNNDIPAPNNTFNTILTKFKRQGLDLVDLVALSGSHTIGNSRCVSFRQRLYNQSGNSKPDTTLDESYAAQLRSRCPKSGGDQNLFFLDFVSPTKFDNSYFKLLLASKGLLNSDQVLTTKSQASLALVKQYAENNALFFDHFAKSMVKMGNISPLTGSRGEIRKTCRKINSS	0.004	3.248	5	6.59341	2	5	1	0.389	NA	0	NA	NA	1.74	6.59341	2	2	2.01	2.5641	1	1	1.97	2.5641	1	1	2.37	2.5641	1	1	0	0	0	1	0	1	Sporadic	Atlas only
Solyc02g085100	Aldose 1-epimerase family protein (AHRD V1 **** D7MMG0_ARALY); contains Interpro domain(s) IPR014718 Glycoside hydrolase-type carbohydrate-binding, subgroup	AT5G66530	MAALSMTWSCSPLTSSKFRRVNRYSGMAFASVKSTEGLGNLPKVVLTSPHGSEAELYLFGACVTSWKVDSKDLLFVRPDAVFNGQKPISGGIPHCFPQFGPGPIQQHGFGRNMNWSLVSSESVKEKPVVTVELRDGPYSRAMWDYSFHALYKITLDKKTLSTELTVKNTDNKPFSFTTALHTYFSASVTGASVNGLKGCKTLNKVPDPTNPVEGKEERDVVTFPGFVDCVYLDAPNELHLDNGLGDKISIKNTNWSDAVLWNPHLTMEQSYKDFVCVENAKIGTVQLEPEQSWTAVQHLTVA	0	55.474	0	20.5298	7	86	7	18.953	57.32	20.5298	7	20	44.78	20.5298	7	17	47.2	20.5298	7	16	46.21	16.5563	5	17	41.14	20.5298	7	16	1	1	1	1	1	5	WTSP	Detected by both ITAG and Atlas
Solyc02g085160	Zinc finger-homeodomain protein 1 (Fragment) (AHRD V1 **-- B0LK17_YUCFI); contains Interpro domain(s) IPR006456 ZF-HD homeobox protein Cys/His-rich dimerisation region	AT2G18350	MEHRGQEKDMGLPNPNPMSYNPSQLNQQESSSSAANKFLTAPNRTTNEHENTIFSPNQTLDQHNITQNSDPDPVRQLSTSSASERNITPVRYKECLKNHAANLGGYVLDGCGEFMPSGEEETLEYLKCAACDCHRNFHRKETEDESQTPGVHRNNHRIPNQTPPSLPAVPTQQQHHHKYPHSYPRGHMAPVMMSFGGNTGVAAESSSEDLNMFHGGQGVIQPCNFSASKKRFRTKFSQQQKDRMLEFAEKLGWRIQKQDEQEVHQFCNEVGVKRQVFKVWMHNSKQATKKKQN	0	7.984	0	4.43686	1	2	1	0.585	NA	0	NA	NA	5.94	4.43686	1	2	NA	0	NA	NA	NA	0	NA	NA	NA	0	NA	NA	0	0	0	1	0	1	1 Peptide	Detected by both ITAG and Atlas
Solyc02g085290	Maf-like protein expressed IPR003697 Maf-like protein	AT5G66550	MAPKNLSFKIILGSSSMARRKILADMGYEFTVMGADIDEKSIRKDNAEELVIALAEAKADAIMSRLKTTDQLDENTHSTLLITADTVAVYEGIVREKPSSKEEARQFIKSYSGGQATVVGSVVVTNLTKGIRKGAWERSEVYFHDIPDEIIDSLIEEGIILNVAGGLMLEHPLTLPFVDTLIGTADSVMGLPRNLTEKLIEEAL	0	41.261	0	22.0588	4	33	4	13.678	30.36	22.0588	4	8	21.17	22.0588	4	6	22.96	22.0588	4	6	22.7	22.0588	4	6	25.9	22.0588	4	7	1	1	1	1	1	5	WTSP	ITAG only
Solyc02g085350	Succinate dehydrogenase flavoprotein subunit (AHRD V1 **** B8CCT7_THAPS); contains Interpro domain(s) IPR011281 Succinate dehydrogenase, flavoprotein subunit	AT2G18450	MWRCVSRGLRASSNRSISGGGHFRRLFSSQTNVGGSSYTVVDHTYDAVVVGAGGAGLRAAIGLSEHGFNTACITKLFPTRSHTVAAQGGINAALGNMTEDDWRWHMYDTVKGSDWLGDQDAIQYMCREAPKAVIELENYGLPFSRTEDGKIYQRAFGGQSLDFGKGGQAYRCACAADRTGHALLHTLYGQAMKHNTQFFVEYFALDLLMNSDGSCQGVIALNMEDGTLHRFRAANTILATGGYGRAYFSATSAHTCTGDGNAMVARAGLPLQDLEFVQFHPTGIYGAGCLITEGSRGEGGILRNSEGERFMERYAPTAKDLASRDVVSRSMTMEIREGRGVGPLKDHIYLHLNHLPPEVLKERLPGISETAAIFAGVDVTKEPIPVLPTVHYNMGGIPT…	0	36.694	0	14.4674	7	18	7	1.089	16.69	8.90302	4	5	20.8	7.94913	4	6	NA	0	NA	NA	16.68	8.90302	4	5	5.81	4.61049	2	2	1	1	0	1	1	4	CIP	Detected by both ITAG and Atlas
Solyc02g085520	Adenylosuccinate synthetase, chloroplastic (AHRD V1 **** PURA_SOLBU); contains Interpro domain(s) IPR001114 Adenylosuccinate synthetase	AT3G57610	MNISTLRLDSNPITTATATHRNGILGCNGTYSYRFNQFQQRKKTASIVVCSTKPLASVVDHQGVNESGLRRIESLSQVSGVLGCQWGDEGKGKLVDILAKHFDIVARCQGGANAGHTIYNSEGKKFALHLVPSGILNEETLCVIGNGVVVHLPGLFKEIDGLEANGVSCQGRILVSDRAHLLFDFHQEIDGLREAELAKSFIGTTKRGIGPCYSSKVIRNGLRVSDLRHMDTFPQKLDLLLSDAAARFPGFKYGPDMLREEVERYKKFAERLEPFVTDTVHFMNDAISQKKKILVEGGQATMLDIDFGTYPFVTSSSPSAGGICTGLGIAPKVVGDLVGVVKAYTTRVGSGPFPTEIMGKGGDLLRFAGQEFGTTTGRPRRCGWLDIVALKFCCQINGF…	0	79.378	0	24.6127	15	82	10	3.084	57.7	18.2444	11	18	56.26	19.9656	11	20	44.93	17.3838	9	15	43.04	13.5972	9	15	41.52	10.6713	6	14	1	1	1	1	1	5	WTSP	Detected by both ITAG and Atlas
Solyc02g085700	Geranylgeranyl pyrophosphate synthase (AHRD V1 ***- D0FZ25_9ASTE); contains Interpro domain(s) IPR000092 Polyprenyl synthetase	AT4G36810	MSLSTTITTWGYTHHPFSDVGNKGRSRFRSPGFMPHLKMKFFTNPSSLSVSALLTKEQESKSKKQAMEFKEYVLEKAVSVNKALESAVSIKEPVMIHESMRYSLLAGGKRIRPMLCIAACELVGGVESTAMPAACAVEMIHTMSLIHDDLPCMDNDDLRRGKPTNHKIYGEDVAVLAGDALLALAFEHIATHTKGVSSDRIVRVIGELAKCIGAEGLVAGQVVDIISEGISDVDLKHLEFIHLHKTAALLEGSVVLGAILGGAPDEDVEKLRKFARCIGLLFQVVDDILDVTKSSQQLGKTAGKDLVADKVTYPKLIGIEKSREFAEELNKEAKAQLVGFDQEKAAPLFALANYIAYREN	0	46.91	0	22.5	9	50	8	3.833	22.16	15.2778	6	9	25.76	15.5556	6	9	34.09	20.2778	8	12	24.23	17.7778	7	9	30.55	19.7222	7	11	1	1	1	1	1	5	WTSP	Detected by both ITAG and Atlas
Solyc02g085730	Allene oxide cyclase (AHRD V1 **** Q9LEG5_SOLLC); contains Interpro domain(s) IPR009410 Allene oxide cyclase	AT1G13280	MATVSSASAALRTISSSSSKLSSAFQTKKIQSFKLPNPLISQNHKLTTTSTTASRSFSCKSQSTSTDSTNTEVQELSVYEINERDRGSPAYLRLSQKTVNSLGDLVPFSNKLYTADLKKRIGITAGLCILIKHEEEKKGDRYEAVYSFYFGDYGHIAVQGAYLTYEETYLAVTGGSGIFAGVSGQVKLQQLIFPFKLFYTFYLKGIPGLPSELLCTAVPPSPTVEPTPEAKACEEGAALKNYTN	0	15.22	0	12.7049	3	23	3	1.154	15.71	12.7049	3	6	16.58	12.7049	3	6	11.5	12.7049	3	5	9.53	12.7049	3	4	1.98	6.96721	2	2	1	1	1	1	1	5	WTSP	Detected by both ITAG and Atlas
Solyc02g085950	Ribulose bisphosphate carboxylase small chain (AHRD V1 ***- A9YTZ7_SOLTU); contains Interpro domain(s) IPR000894 Ribulose bisphosphate carboxylase, small chain	AT5G38410	MASSIVSSAAVATRGNGAQASMVAPFTGLKSTASFPVSRKQNLDITSIASNGGRVSCMQVWPPINMKKYETLSYLPDLSDEQLLSEIEYLLKNGWVPCLEFETEHGFVYRENHKSPGYYDGRYWTMWKLPMFGCTDATQVLAEVQEAKKAYPQAWVRIIGFDNVRQVQCISFIAYKPEGY	0	33.462	0	27.7778	8	231	1	14.849	130.53	27.7778	7	99	46.2	27.7778	7	37	58.56	27.7778	7	36	43.02	16.1111	5	24	58.1	27.7778	8	35	1	1	1	1	1	5	WTSP	Detected by both ITAG and Atlas
Solyc02g086080	Alpha/beta hydrolase fold (AHRD V1 ***- A1T9R4_MYCVP); contains Interpro domain(s) IPR000073 Alpha/beta hydrolase fold-1	AT5G38360	MATVCTLILPKFPQSRGVSTTRAVLKRDPKMKVPYELKQEQSRLFHKLPSGLNMEVLYQRGSDQIRSTKNPPLVFVHGSFHAAWCWAEHWLPFFSQNGYDSYALSLLGQGESDSPAAAVAGTLETHAGDIADFIHKEIRLPPVLLGHSFGGLIVQYYIANIRREAVKGSDSEKKSLFPNLSGAVLVCSVPPSGNSGLVWRYLFSKPLAAFKVTRSLAAKAFQTSLPLCKETFFSAGMEDQLVARYQELMTESSRMPLFDLRKLNASLPVSRLEDPAFKVLVVGAKDDFIVDMEGLNETGRFYGIPTVCIEGVAHDIMIDCSWRKGAQLILSWLNSLN	0	9.633	0	11.8694	4	11	4	0.778	4.73	5.34125	2	2	2.02	4.1543	2	2	6.26	8.60534	3	3	4.9	9.79228	3	3	3.08	4.45104	1	1	1	1	1	1	1	5	WTSP	Detected by both ITAG and Atlas
Solyc02g086460	Unknown Protein	AT5G40450	MEYDAEIPEIKSIKEENLLGEVYTISDKLKMEKDKRDRSLSEFEGTSDVENVKDLIKGSYGTTEGENFYASPLVSKAVEENGSSVEAPVSVNTPNKSDEQMSGSSFHQEEKAEEKRVEIVSAGIQNPSEESETSCEMNNVEKNTSIPLTVRGDVSSEKYKTEGADAEAIKSPGDANDEKVVKDENDYNGDRNIFISPNSECQRGEDEKKETGDGEGARNVLFNSFVDVVEETRSDYAESDTSGKHGDNSIEKVNQDVADHPEVEQKTEELEIEEKPIIEEKTKEPIVTEKHAGSAVEEKPEEPAVEVKTEEPVVQEKPEETEVQEKFERTMVEEKPEELVVEETPKEPTREKTSKELEFEEKPEKKIQVVDLNDKSENELPCNTNNDAANFAEFEEPAV…	0.004	2.576	9	0.291314	1	1	1	0.013	NA	0	NA	NA	2.96	0.291314	1	1	NA	0	NA	NA	NA	0	NA	NA	NA	0	NA	NA	0	0	0	1	0	1	1 PSM	ITAG only
Solyc02g086540	Double-strand-break repair protein rad21 (AHRD V1 *-*- C5FNZ1_NANOT); contains Interpro domain(s) IPR006910 Rad21/Rec8 like protein, N-terminal	AT3G59550	MSNQVSLLGRKDPLAIVWKAATIPSNLKKSQYASTNVLSSLELIKSPTKRFELRQSAYLLFGVVRIHSKQVEYFLHDCKALKMGIRKAILSTKDAAHAPYNSITLPKTFQLDSFDFEDDLHNLNRIEDKNLKNNEEITLQDEIPVREDPILISEDVDEPEFMLDVVHDHHDPLWDDHVMDPDDGLEELMTMTDNGTANLEVEEMTENEEPPSVISADQVQEFTINPHEISFGHQSADHLVLQSTPKLMRKRRKLLIDAETELESNMQLGTLKRRRKNALLFFLMNRSKLNKKCRKDGMSFEPLLNGLCDDLRNICKEDIVSTKLKMASSQAEEEQDHAESSDGLSMDGFTPSTCYKEDTIMSDIHEFDSSAEDLSFLDQEDRTPFGEQGGTTEFDTLPV…	0.021	2.011	29	3.15126	1	1	1	0.166	2.75	3.15126	1	1	NA	0	NA	NA	NA	0	NA	NA	NA	0	NA	NA	NA	0	NA	NA	0	0	0	0	1	1	1 PSM	Atlas only
Solyc02g086560	Cobalamin (Vitamin B12) biosynthesis CbiX protein (AHRD V1 *--- A6C9M5_9PLAN); contains Interpro domain(s) IPR002762 Cobalamin (vitamin B12) biosynthesis CbiX	AT1G50170	MDSLSLQSHLSLRSSTSTYPARGPGIAVPEFVKLLKGPSKSRYLPQRYCMATSSREGLKGIEEGDGVIIVDHGSRRKESNLMLNGFVAMFRERTKYPIVEPAHMELAEPSIRDAFSLCVQQGARRVIVSPFFLSPGRHWNQDIPSLTAEAAKEHPGVPYVITAPLGLHELLVDVVNDRINHCLSHIAGKADECSVCAGTGKCQLRQ	0	12.461	0	13.1068	2	9	2	0.778	8.83	13.1068	2	3	9.31	13.1068	2	3	2.49	5.82524	1	1	4.94	13.1068	2	2	NA	0	NA	NA	0	1	1	1	1	4	WTSP	Detected by both ITAG and Atlas
Solyc02g086610	Isocitrate dehydrogenase-like protein (AHRD V1 **** Q8LPJ5_ARATH); contains Interpro domain(s) IPR004790 Isocitrate dehydrogenase NADP-dependent, eukaryotic	AT1G65930	MAGVASFVSSSSASASSIASKKFYFQVNSNRQLFNNRVSLTTRIPNASIRCFASTSGPTSKILVQNPIVEMDGDEMTRVIWKMIKDKLIYPYLELDTKYYDLGILNRDATDDQVTVESAEATLKYNVAVKCATITPDETRVKEFGLKSMWKSPNGTIRNILNGTVFREPILCTNIPRIVPGWKKPICIGRHAFGDQYRATDAIINGPGKLKMVFVPENGESPTELDVYDFKGPGIALAMYNVDQSIRAFAESSMSMAFSKKWPLYLSTKNTILKKYDGRFKDIFQEVYEEKWKQQFEEHSIWYEHRLIDDMVAYVLKSEGGYVWACKNYDGDVQSDLLAQGFGSLGLMTSVLLSSDGKTLEAEAAHGTVTRHFRLHQKGQETSTNSVASIFAWTRGLGH…	0	84.444	0	39.4904	14	66	14	2.924	48.03	33.5456	12	16	40.12	27.6008	10	13	35.46	31.2102	11	15	39.28	28.4501	10	13	25.52	24.4161	8	9	1	1	1	1	1	5	WTSP	Detected by both ITAG and Atlas
Solyc02g086680	Peptide deformylase-like (AHRD V1 **** Q5VNP3_ORYSJ); contains Interpro domain(s) IPR000181 Formylmethionine deformylase	AT5G14660	MAMAAASWASSSSFTRFLRPLLSRNSSPSPISYSLHRYKSANCLFFSASSNKPPKLAVYAQARRVLSSKTKGDEIATPADLSFVVPLKIVEYPDPILRAKNKRIDNFDANLKKLVDEMFDIMYKTDGIGLSAPQVGMNVQLMVFNAAGERGEGEEIVLVNPRVSRYSRRIIPYEEGCLSFPMIHGDVKRPESVKVDAQDINGTRFEISLSALPARVFQHEFDHLQGVLFFDKMTDEVLDTIREKLVALEKKYEDRTGLPTPESINTRKIKKAAVGFGKS	0	17.137	0	18.9964	5	9	5	0.968	5.78	7.8853	2	2	3.03	4.30108	1	1	4.73	7.16846	2	2	4.74	7.16846	2	2	5.7	6.81004	2	2	1	1	1	1	1	5	WTSP	Detected by both ITAG and Atlas
Solyc02g086730	50S ribosomal protein L12-C (AHRD V1 ***- Q8LBJ7_ARATH); contains Interpro domain(s) IPR015608 Ribosomal protein L12, chloroplast	AT3G27840	MASTLSTITLRSPSPISPATASSTHASISFPTKTLELPIRTPKLYHRRATLVRPLAAVEAPEKVVQLGDEISNLTLADAQKLVEYLQDKLGVSAASFAPAAVVASPGGAAADAPAVVEEKTEFDVVIDEVPSNARIATIKAVRALTSLALKEAKELIEGLPKKFKEGVSKDEAEDAKKQLEEAGAKVSIA	0	85.639	0	43.6842	11	83	1	62.096	96.16	43.6842	11	35	88.67	39.4737	9	30	23.17	28.9474	5	8	19.28	28.4211	5	7	6.67	15.7895	3	3	0	1	1	1	1	4	WTSP	Detected by both ITAG and Atlas
Solyc02g086740	50S ribosomal protein L12-C (AHRD V1 ***- Q8LBJ7_ARATH); contains Interpro domain(s) IPR015608 Ribosomal protein L12, chloroplast	AT3G27850	MASTLSTIALCSPSHISPSTHASISFPTKTLQLPIRTSKLHHRRATFVRPLAAVEAPEKVVQLGDEISTLTLADAQKLVEYLQDKLGVSAASFAPAAVVAAPGGAAADAPAVVEEKTEFDVVIDEVPSNARIATIKAVRALTSLALKEAKELIEGLPKKFKEGVSKDEAEDAKKQLEEAGAKVSIA	0	86.584	0	44.6237	11	87	1	99	98.47	44.6237	11	36	101.88	40.3226	9	34	23.96	29.5699	5	8	14.5	29.0323	5	6	6.67	16.129	3	3	0	1	1	1	1	4	WTSP	Detected by both ITAG and Atlas
Solyc02g086750	PWWP domain-containing protein IPR000313 PWWP	no hits	MSSEEKTEKSENLDGLSAEALDSETLMADSVTGLSDEVPRVSDDNGNVDTGAISEPVVATEETLEVGSDAGGDVVEVHGSLDNVSGGELASEGAEADQGSGHLVEEMNGEENVAGGSDDEMIDAVDGETAEDNSGDDTTSVKHVYAVGDFVWGKIKSHPWWPGRVYDASTASDFAMKYNQTGRLLVAYFGDGSFSWCPPSQLVPFVDNFEKMSKQSTSKSFLYAVEKTLDEIGVLVEFQMTCQCVSEESLTGLSWPLAVNAGIKKGVQVPVSETVSLLLSQFEPAERLKGLKRNALTNSHSNILEFAVLNSWLSAFYRAKYGHPLASYCEPLLVEGLEDKKEDQVIDANDFSIPIEVPIQGPSEEIPNSGSSKFPMTACDKIYQKRKQKSVAELMGENA…	0	6.417	0	1.91617	1	1	1	0.075	NA	0	NA	NA	3.62	1.91617	1	1	NA	0	NA	NA	NA	0	NA	NA	NA	0	NA	NA	0	0	0	1	0	1	1 PSM	ITAG only
Solyc02g086820	Carbonic anhydrase (AHRD V1 ***- Q5NE20_SOLLC); contains Interpro domain(s) IPR015892 Carbonic anhydrase, prokaryotic-like, conserved site	AT3G01500	MSTASINNCLTLSPAQASLKKPTRPVAFARLGNSSSSSSIPSLIRNEPVFAAPTPIINPIVREEMAKESYDQAIAALEKLLSEKAELGPVAAARVDQITAELKSADGGKAFDPVEHMKAGFIHFKTEKYDTNPALYGELAKGQSPKFMVFACSDSRVCPSHVLNFQPGEAFMVRNIANMVPAYDKVRYSGVGAAIEYAVLHLKVENIVVIGHSACGGIKGLMSLPEDGSESTAFIEDWVKICLPAKAKVLADHGGKEFAHQCTACEKEAVNVSLGNLLTYPFVREGLVKKTLALKGGYYDFVKGGFELWGLEFGLSPPLSV	0	138.174	0	51.0903	18	434	18	49.119	304	46.1059	16	122	215.2	43.9252	15	84	213.98	36.4486	13	85	186.23	36.4486	12	73	175.03	33.9564	11	70	1	1	1	1	1	5	WTSP	Detected by both ITAG and Atlas
Solyc02g086830	Protease Do-like (S2 serine-type protease) (AHRD V1 **** Q7UQ70_RHOBA); contains Interpro domain(s) IPR001254 Peptidase S1 and S6, chymotrypsin/Hap	AT3G27925	MAASSHSLASSACFSTTPARKFSGSDRFQLAKSLLCRKIPGFSGSVVCARRICSNYASSGDQSNYGKKLMDSIFVACTSVALSFSLYIADVDPASAFVVTSPRKLQTDELATVRLFQENTPSVVYITNLASRQDMFTLDVFEVPQGSGSGFVWDKNGNIVTNYHVIRGASDLRVTLADQTTYDAKVVGFDQDKDVAVLHIDAPKDKLRPIPIGVSADLLVGQKVFAIGNPFGLDHTLTTGVISGLRREINSAATGRPIQDVIQTDAAINPGNSGGPLLDSSGNLIGINTAIYSPSGASSGVGFSIPVDTVSGIVDQLVQFGKVTRPILGIKFAPDQSVEQLGVTGVLVLDAPPNGPAGKAGLLPTKRDSYGRLILGDIITSINGKKVSNGTDLYRILDQ…	0	80.517	0	31.1628	13	137	13	11.915	81.04	25.5814	10	24	108.95	27.6744	11	35	86.56	27.2093	11	28	95.34	26.5116	11	31	65.52	20.4651	8	19	1	1	1	1	1	5	WTSP	Detected by both ITAG and Atlas
Solyc02g086880	Formate dehydrogenase IPR006140 D-isomer specific 2-hydroxyacid dehydrogenase, NAD-binding	AT5G14780	MAMRRVASTAARAIASPSSLVFTRELQASPGPKKIVGVFYKANEYAEMNPNFLGCAENALGIREWLESKGHQYIVTPDKEGPDCELEKHIPDLHVLISTPFHPAYVTAERIKKAKNLQLLLTAGIGSDHVDLKAAAAAGLTVAEVTGSNTVSVAEDELMRILILVRNFLPGHHQVINGEWNVAAIAHRAYDLEGKTVGTVGAGRIGRLLLQRLKPFNCNLLYHDRLKMDSELENQIGAKFEEDLDKMLSKCDIVVINTPLTEKTKGMFDKERIAKLKKGVLIVNNARGAIMDTQAVVDACNSGHIAGYSGDVWYPQPAPKDHLWRYMPNQAMTPHISGTTIDAQLRYAAGTKDMLDRYFKGEDFPAENYIVKDGELAPQYR	0	34.926	0	13.9108	5	20	5	1.069	20.23	11.5486	4	6	32.22	13.9108	5	8	6.39	5.51181	2	2	10.11	7.87402	2	3	3.61	3.14961	1	1	1	1	1	1	1	5	WTSP	ITAG only
Solyc02g086890	Calcium homeostasis regulator chor1 (Fragment) (AHRD V1 *-*- A6N1L7_ORYSI)	AT3G55250	MVVVSSLHSPSSSSSIYCNSISPSLRYFRRFYTFPSRRNNSNSNGGAVLLVKAYMDETTNPISSFANKVIGSLPVFGLIARIVNEEGGVGGDFIDFAEFRRRVGNKCSINDSRAFYEFRDRRGKTGDPLYVLLCCWLAAVGAGLLKSEEILEGVARLSLANDIEFEEQNFIAMMNEAREKRSKLGAPAPTIPMEFRAEKALEAIHVCCYGRDLIDEEDEKLLSTMLNAVFPTVGRQKVEIIVKEKAKRMADGTEEIKYEPKQLSKEAVQMQMKDLEFLKQNSLNQ	0	25.778	0	18.5965	5	29	5	1.738	9.3	15.4386	4	4	11.54	11.9298	3	4	17.09	18.5965	5	6	19.69	18.5965	5	8	17.44	18.5965	5	7	1	1	1	1	1	5	WTSP	Detected by both ITAG and Atlas
Solyc02g086910	Peptidyl-prolyl cis-trans isomerase cyclophilin-type (AHRD V1 ***- A8IRU6_CHLRE); contains Interpro domain(s) IPR002130 Peptidyl-prolyl cis-trans isomerase, cyclophilin-type	AT3G01480	MAASVSCHYFSSPLTTSTKSIKPKLNYSHFAPALSKGSIRHFVPLCSSQRSLPSESECQDKEKDWFLSLKKCAAAVALSVSLISGLPGSQWLGPAHASTPALPDVSVLISGPPIKDPGALLRYALPIDNKAIREVQKPLEDITDSLKIAGVKALDSVERNTRQASRALKEGKTLIISGVAKSKTDHAIELLNKLEAGLGELQQIVEDRTRDAVAPKQKELLNYVGGVEEDMVDGFPYEVPEEYQNMPLLKGRATVDMKVKVKDNPNLEECVFRIVLDGYNAPVTAGNFIDLVERHFYDGMDIQRADGFVVQTGDPEGPAEGFIDPSTEKTRTVPLEIMVVGEKAPFYGETLEDLGLYKAQTRLPFNAFGTMAMAREEFENNSASSQVFWLLKESELTPS…	0	107.652	0	30.3769	13	194	13	19.691	98.35	27.2727	11	36	134.79	28.6031	12	51	119.98	25.4989	11	37	147.17	23.7251	10	47	67.09	20.6208	9	23	1	1	1	1	1	5	WTSP	Detected by both ITAG and Atlas
Solyc02g087150	Heavy-metal-associated domain-containing protein (AHRD V1 *-*- D7M6P1_ARALY); contains Interpro domain(s) IPR006121 Heavy metal transport/detoxification protein	AT5G14910	MATVSAFSVCRAKSHSRIPHSSSNAIPQLFPMQFLRCQSNRSIGGGYSCSSSSVKAKVPLRTTRICSATEEDGATAVAEEESAAPTTSDQTVSVSVSPSDVLTMFFQAEGTMNEAAIPSVTNSLEDIEGITGLKIQVVEGIASVELTKQTTIQATGVASSLVETIQGSGFKLQTLNLSFQDEEDIS	0	11.622	0	7.52688	1	15	1	2.162	11.15	7.52688	1	4	6.54	7.52688	1	2	11.56	7.52688	1	4	8.54	7.52688	1	3	5.93	7.52688	1	2	1	1	1	1	1	5	WTSP	Detected by both ITAG and Atlas
Solyc02g087230	Ferredoxin-thioredoxin reductase catalytic chain (AHRD V1 ***- B6TNR7_MAIZE); contains Interpro domain(s) IPR004209 Ferredoxin thioredoxin reductase, beta subunit	AT2G04700	MRTLQASTSYSVGFGISSFATRPKPSSTHRCLTVAKMEPSEKSVEIMRKFSEQYARRSETYFCMDKGVTSVVIKGLAEHKDTLGAPLCPCRHYDDKAAEAQQGFWNCPCVPMRERKECHCMLFLTPDNDFAGEEQTITMEEIKETTANM	0.003	3.518	4	5.36913	1	4	1	0.585	0	5.36913	1	1	NA	0	NA	NA	2.88	5.36913	1	1	2.76	5.36913	1	1	2.78	5.36913	1	1	1	1	1	0	1	4	WTSP	Detected by both ITAG and Atlas
Solyc02g087240	NADH-quinone oxidoreductase F subunit family protein (AHRD V1 **** Q23KE4_TETTH); contains Interpro domain(s) IPR011537 NADH ubiquinone oxidoreductase, F subunit	AT5G08530	MAPIKGLLSLQRTALAQRSSERWGQYGRLFSTQAASTASTPQPTPPPPPPERTHFGGLKDEDRIFTNLYGLHDPYLKGAMKRGDWYRTKDLVIKGSDWIVNEMKKSGLRGRGGAGFPSGLKWSFMPKTTDGRPSYLVVNADESEPGTCKDREIMRHDPHKLLEGCLIAGVGMRARAAYIYIRGEYVNERLSLQKARQEAYEAGLLGKNACGSGYDFDVYIHFGAGAYICGEETALLESLEGKQGKPRLKPPFPANAGLYGCPTTVTNVETVAVSPTILRRGPEWFASFGRKNNAGTKLFCISGHVNKPCTVEEEMSISLKELLERHCGGVRGGWDNLLAVIPGGSSVPLLPKNICEDVLMDFDALKAVQSGLGTAAVIVMDKSTDVVDAIARLSYFYKH…	0	7.61	0	4.51745	2	2	2	0.212	NA	0	NA	NA	5.31	4.51745	2	2	NA	0	NA	NA	NA	0	NA	NA	NA	0	NA	NA	0	0	0	1	0	1	Sporadic	Detected by both ITAG and Atlas
Solyc02g087250	Group II intron splicing factor CRS1-like IPR001890 RNA-binding, CRM domain	AT3G01370	MNIINRAASIFLLLVFFLAFFKDSVHGRPLLLSMSRPKPDDAALFARWLVSQNYWGVLNTIASDMGGAPFGNVVSFSDGLPDKGRGIPYFYLTTLDPTARNALKDQRSSFTISEYAIGTCGKKDPENPSCAKITLVGKLKVVAGDPKETSFAQTALFTKHPEMEGWPKSHDFQIYKLEIEEIFMINWFGGPKPLTVDQYLQAKMIASSSSTPMLLPFCNFHPINPSKTLLKPSPSHSLFSSTPSLSPKPFFPRDSLPVFAASPDTEALPESAIRRIADKLRSLGFVEQPKNQETQENALSSNPTANSPGQIFVPLPTQLPKYRVGHTLDTSWSTPENPVPQPGLGKSIQKFHELRDEFLKEKDKERLKNKEYKKERAPSLAELTLPAEELRRLRTVGIA…	0.02	1.747	47	0.555115	1	16	1	0.04	1.88	0.555115	1	2	4.28	0.555115	1	2	9.92	0.555115	1	5	8.86	0.555115	1	4	2.32	0.555115	1	3	1	1	1	1	1	5	WTSP	ITAG only
Solyc02g087400	Ankyrin repeat domain containing protein (AHRD V1 *--- B2WQ30_PYRTR); contains Interpro domain(s) IPR002110 Ankyrin	AT2G47450	MDALFVNSSLSRLKLKFSSQFPTFSPLPHHSYLPLKKLNLPLVFATLQNQHQQQSAAEEVAQEEFEDYDADETYGEVNKIIGSRAIEGGKGMEYLIEWKDEHAPTWVPSNFIAQDVVAEYETPWWNAAKKSDESALRELIEAEDDRDVDAVDDDGRTALLFVSGLGSEPCVKLLAEAGADVNYRDRSGGLTALHMAAGYVKPGVAKLLIELGADPEVQDYRGQTPLSLARMVLNQTPKGNPMQFARRLGLENVIRVLEDAIFEYAQVEEILEKRGKGENVEYLVKWKDGEDNEWVKAWLISEDLVRDFEAGLEYAEAECILEKREGDNGKGEYLVKWTDIEEATWEPEENVDPLLIEDFEKGQQKVVS	0	66.811	0	29.8913	11	61	11	5.31	63.48	20.1087	7	18	60.21	25.2717	9	17	32.7	11.6848	3	8	40.76	14.1304	4	12	16.49	17.1196	5	6	1	1	1	1	1	5	WTSP	Detected by both ITAG and Atlas
Solyc02g087930	60S ribosomal protein L34 IPR008195 Ribosomal protein L34e	AT3G28900	MVQRLTYRKRHSYATKSNQHRIVKTPGGKLIYQTTKKRASGPKCPVTGKRIQGIPHLRPAEYKRSRLPRNRRTVNRAYGGVLSGSAVRERIIRAFLVEEQKIVKKVLKIQKAKEKLASKS	0.02	1.749	47	6.66667	1	2	0	0.468	1.73	6.66667	1	1	2.35	6.66667	1	1	NA	0	NA	NA	NA	0	NA	NA	NA	0	NA	NA	0	0	0	1	1	2	1 Peptide	ITAG only
Solyc02g088000	Glycogen synthase (AHRD V1 **** D5MJP6_9BACT); contains Interpro domain(s) IPR011835 Glycogen/starch synthases, ADP-glucose type	AT3G01180	MENSIVLHTGNQFHPSLPFFSFRPKKLSRIHGSSREQMWRIKRVKATGENSGEAASADESDDALQVTIEKSKKVLAMQQDLLQQIAERRKVVSSIKSSLADATGTYDGGSGSLSDVDIPDVDKDYNVTVPSTAATPITDVDKNTPPAISQDFVESKREVKRDLADERAPPLSRSSITASSQTSSTVSSKRILNVPPETPKFSQETLLNVNSRKSLVDVPGKKIQSYMPSLCKESSAQSLVEKRNENLEGSSAEANEETEDLVNIDEKPPPLAGTNVMNIILVASECAPWSKTGGLGDVAGALPKALARRGHRVMVVAPRYDNYPEPQDSGVRKIYKVHGQDVEVTYFQAFIDGVDFVFIDSHMFRHIGNNIYGGNRVDILKRMVLFCKAAIEVPWHVPC…	0	65.566	0	18.2292	11	56	11	1.913	45.85	15.2344	8	15	43.75	13.8021	7	14	36.95	12.8906	7	12	25.23	11.5885	7	8	20.68	11.5885	6	7	1	1	1	1	1	5	WTSP	Detected by both ITAG and Atlas
Solyc02g088260	Latex abundant protein 1	no hits	MSYYPKGHHDDDGTEFDEYDPTPYGGGYDIALTYGRPLPPSEETCYQPSSASDEFDYDRPQYTSYAEPSAYGDEALDNEYQSYSRPKPRPTPSYRPSEETHTYEQPQADYGFQPGVNRPGGESEYGSGYGRKSEYEEEPTSEYGSGYGRKSEYEEPKPQYGSGYGRKSEYEEPSSEYGSGYGRKSEYEEPTPQYGSGYGRKSEYQEPSSEYGSGYGRKSEYEEPTPQYGRRSEYEEPASEYGSGYRKKSEYEEPSSEYGSGYGRRNESEEYGSGGYGRKPSYGQEEGERPSYGRPSYQAEEGEGYERPHYGRSEEDYRKPSYERRGDDDEGYGRKKYGEDNSDDDDEEKKHRYHHHRKHYDD	0.002	3.727	3	3.59116	1	2	1	0.389	NA	0	NA	NA	NA	0	NA	NA	2.86	3.59116	1	1	2.57	3.59116	1	1	NA	0	NA	NA	0	1	1	0	0	2	1 Peptide	ITAG only
Solyc02g088350	Genomic DNA chromosome 3 P1 clone MXO21 (AHRD V1 ***- Q9LS78_ARATH)	AT3G29185	MATAPAIFVPSTSLASSNARKINLSSWNEKLVIPQNFPFWTPKYQSRKPPSCSGTNVTVVQGDRNTTELPMSIDALDSFIRLNLGNWTGSFHQFDGHGNLMHRITTKLAVGSYGEGELMSLLQTLYIKQPPSTTSCSGDDCESEWFEYKIKETNMFTVDKYQQIGFFPKEKAYALRYQTAGMLETVLRQGVLGEDDIGEESPRNLKLPSKRPSIVCENCLYSLEKDRRVRAFHIMDPKGVLEMLLVFLEERGNGEAIPPSFDDFKEDTERILPHLGTWKGHSRTTRTGVYGATITEASTTAVLEINKDGQLIQDITSTSGATNITTNVHWTGTISNNLVTFDGGFQLTLLPGGIYMGYPSDVAKNVQESTAFHVEFCWLESPGKRQRLIRTYDVEGFAV…	0	22.646	0	16.6259	5	16	5	1.276	6.47	7.09046	2	2	5.03	5.13447	2	2	13.01	12.4694	4	5	8.67	10.7579	3	3	10.76	10.0244	3	4	1	1	1	1	1	5	WTSP	Detected by both ITAG and Atlas
Solyc02g088460	Chorismate mutase 1 (AHRD V1 **** D2CSU4_PETHY); contains Interpro domain(s) IPR008238 Chorismate mutase of the AroQ class, eukaryotic type	AT3G29200	MEAQLLRLSSTPITTPLITNYKRNNTLLPHQKFLKFHLSNSGTIKHGIRPIQAFSASLGEMKRIDETESYTLDGIRNSLIRQEDSIIFSLVERAQYCFNAETYDPNVFVMDGFHGSLVEYIVKETEKLHAKVGRYTSPDEHPFFPKTLPEPMLPPMQYPKVLHSAADSININVTIWEMYFKKLLPRLVKEGNDGNSGSTAVCDTICLQALSKRIHYGKFVAEAKFRASPDVYKAAIKAQDRDGLMDLLTYPTVEEAIKNRVEMKTKTYGQELNNGPEHVGDPVYKIKPSLVAELYGDWIMPLTKDVQVEYLLRRLD	0	24.995	0	20.2532	5	18	5	2.455	11.64	14.8734	4	4	10.6	10.443	3	4	11.8	13.6076	3	4	9.57	8.22785	2	3	7.74	7.59494	2	3	1	1	1	1	1	5	WTSP	Detected by both ITAG and Atlas
Solyc02g088540	tRNA guanosine-2&apos-O-methyltransferase (AHRD V1 *-*- B9L1B3_THERP); contains Interpro domain(s) IPR001537 tRNA/rRNA methyltransferase, SpoU	AT5G15390	MSACKTLVRSSISFFQFQTRNSYQRSFSSHISSNFSFFRPLPLLSRNPAFRIEPCRDPSRRYGSTQGAISLETSEEMAVPRVAVESSEEKSKDTVEELLYNKDDVSKLMKMERRLDTEGLGHQERWFPYLDKVKAGSMYLSSSEILEAVTPYIMDSRKERFRHAVKNRTYSVCLVVEGLSDFGNVSATFRSADALGIQSVHVVACDSSKRYRENRHVSMGAEKWLDIELWDSVHECFTVLKSRGYRIATTHLGMDTVSVYDMDWSCPTAIVVGNELRGISDEALESSDLHCSIPMKGMVDSFNVSVAAGLLMHHAVCDRTSRLGCHGDLTREESRILLAEFSLRHNDNAIRIAQEYAERKIAELKSKL	0	6.923	0	3.26087	1	1	1	0.233	3.84	3.26087	1	1	NA	0	NA	NA	NA	0	NA	NA	NA	0	NA	NA	NA	0	NA	NA	0	0	0	0	1	1	WTSP	Detected by both ITAG and Atlas
Solyc02g088610	ATP-dependent chaperone ClpB (AHRD V1 **** B5W0X8_SPIMA); contains Interpro domain(s) IPR017730 Chaperonin ClpB	AT5G15450	MSTVTSFSGVQFCVPSSSSNSSNRVALFSSHSAPYLNFSGKSRVLGKCSSLKLKRKDVFFSRKTEKLSQGSRLTVRCDASNGRITQQDFTEMAWQAIVASPEIAKENKHQIVETEHLMKALLEQKNGLARRIFSKTGVDNTRLLEATDKFIRQQPKVIGETAGSMLGRELEGLMQRAREYKKEYGDSFVSVEHLVLGFIQDKRFGKQLFNDFQISLKTLKTAIESIRGRQNVIDQDPEGKYESLEKYGKDLTAMARAGKLDPVIGRDDEIRRCIQILSRRTKNNPVLIGEPGVGKTAISEGLAQRIVQGDVPQALMNRRLISLDMGALIAGAKYRGEFEDRLKAVLKEVTESEGQIILFIDEIHTVVGAGATNGAMDAGNLLKPMLGRGELRCIGATTL…	0	282.562	0	43.5714	45	214	43	17.166	151.24	27.2449	28	46	146.41	28.7755	25	46	147.73	33.2653	31	49	101.09	29.5918	27	37	107.74	26.0204	24	36	1	1	1	1	1	5	WTSP	Detected by both ITAG and Atlas
Solyc02g088700	Mitochondrial processing peptidase beta subunit (AHRD V1 ***- Q9AXQ2_CUCME); contains Interpro domain(s) IPR011237 Peptidase M16, core	AT3G02090	MTIRQLLTLARRSRNLSSSHSLRRLSSASAAVAATSSSAPAIGPPPPDAMIYDRLAEDVKRKIKRLENPDSRFLQYNSPHPTLADHTSILSFPSTRVTTLPSGLRVATETNLAVKTATVGVFIDAGSRFETDETNGTAHFLEHMIFKGTEKRTSWEMEEEIENMGGHLNAYTSREQTAYYAKVLDNDVPVALDILADILQNSKFEEKKIERERDVILREMEEVEGQTEEVIFDHLHSTAFQYSPLGRTILGPAQNIKTITRSHLKDYISTHYTAPRMVIVASGPVKHEEFVEQVKKQFTKLSTNPSTASELVAREPAIFTGSEVRVIDDDIPLAQFAVAFQGAPWTDPDAIPLMVMQSMLGTWNKNAGGGKHMGSDLAQSVGINELAESHDVFLTPTIR…	0.008	2.662	10	2.06767	1	1	1	0.105	NA	0	NA	NA	1.77	2.06767	1	1	NA	0	NA	NA	NA	0	NA	NA	NA	0	NA	NA	0	0	0	1	0	1	1 PSM	Detected by both ITAG and Atlas
Solyc02g088780	Ribosome biogenesis protein ytm1 IPR020472 G-protein beta WD-40 repeat, region	AT5G15550	MAGMDIDGNVEEAARRVQVRFVTKLKAPFKAPPTSIAIPSNLTRLGLSSIVNNLLKAGNDDWNPEPFDFLIDGELVRMSLEEFLLAKGISAEKILEIEYIRAVAPRKEEEPSLHDDWVSAVDGSNSMFVVTGCYDGFGRIWMAAGSCTHLLEGHTDAITSVCVVKPRVAQNGADQIVATASKDRTLRLWKFDADESSDQTKRIRAFKILHGHNASVQSVTANPAGDMVCSGSWDSQIALWQASGCSDTGDVISVKKRKKNADEEDPQVEEEAKSTLVGHTQCVSSVVWPQDETIYSASWDHSIRRWDVEMGKDSLNLYCDKVVNCLDVGGEGSSLIAAGGSDPVLRIWDPRKPGSSAPVYQFSSHSSWISACKWHEKSRFHLVSASYDGKVMLWDLRTA…	0	11.672	0	8.27423	3	4	2	0.638	NA	0	NA	NA	2.78	3.30969	1	1	NA	0	NA	NA	8.38	8.27423	3	3	NA	0	NA	NA	0	1	0	1	0	2	Sporadic	ITAG only
Solyc02g088790	RNA-binding protein IPR015465 RNA recognition motif, glycine rich protein	AT1G74230	MVFNHHICLKDTNTTLLNKGITRQQVFFFIAIIPPKVGLKMAFVNKIGNILRHGVGKNANLELSASNGSLFQTIRSMSSSKLFVGGLSYGTDESSLKETFSQYGEVIEARVILDRETGRSRGFGFISFPSSEEATSAMQAMDGQDLHGRRIKVNYATEKRRDGFGGGYGGEGGNFAGGGGYAASNYGGGGGGFSGGYNSPGGGGYNSAGGGGYGSSSGYNYGGGEGRNFAGSGGYQTNNYGGGFSSGHSSAGGYGSYGGGSSSYGNNSSPVEGGNYGSSTPNINYSGQGSSFSGGYGGGNSGNDFGGAPSNNNNSFANTGFGGRSEASYNGSQEQVSADQGIQSVNEHLGEETSEGNYRDDDDEPKDYANTRS	0.002	3.359	4	3.48525	1	1	1	0.212	NA	0	NA	NA	2.97	3.48525	1	1	NA	0	NA	NA	NA	0	NA	NA	NA	0	NA	NA	0	0	0	1	0	1	1 PSM	ITAG only
Solyc02g089150	MAPprotein kinase-like protein IPR017946 PLC-like phosphodiesterase, TIM beta_alpha-barrel domain	AT5G67130	MGPHQNISSLFLIFSVLFVVAAADCSNGTCKLDDKCSSDADCGPGLYCLSCALSFQGHRCVRSTGTDPFKLVNSSLPFNKYAFLTTHNAFSIEGEPSHTGIPRITPTNQEDNITQQLNNGVRGLMLDTYDFDGDIWLCHSFGGECHDYTAFEPAIDTLKEIEAFLSSNPSEIVTLILEDYVETPNGLTKVFTDAGLMKYWFPVAKMPKGGQDWPLVSDMVTNNQRLIVFTSVKSKEQSEGIAYQWNYMVENQYGDGGMEKGNCPNRAESSPMNDKSKSLVLVNYFRTLPLKPLACVQNSGNLLDMLMTCHDTAANRWANFIAVDFYKRSDGGGAFLATDTLNGQLLCNCGDVHSCAKGSTPGSCTRSVDHDQEN	0.039	1.499	97	2.13904	1	1	1	0.212	NA	0	NA	NA	NA	0	NA	NA	NA	0	NA	NA	0	2.13904	1	1	NA	0	NA	NA	0	1	0	0	0	1	1 PSM	ITAG only
Solyc02g089800	Nuclear matrix constituent protein 1-like	AT1G68790	MDQEELIEKVSKLENELFDYQYNMGLILLEKKEWSSKFEEIKQTLEESNEAYRREQAAHLIAISEVEKREENLRKALGVEKQFARELEKELREMRLEYAEIKYTADSKLAEANALATSVEEKSLEVEAKLRAADAKLAEVNRRSSEVERKLNEVYAQENSLRRERSSFNAEREAYETNLSRQREDSQEWERKLQAAEEKLADGQRLLNQREKRANDTDRILRQKQNDLEDEQRKIVTANSVLRKKEDDMGSKIEDLTHKEKELEDARKSLGIKERELLDLQEKLNIKERDGIQNLMDEHRSVLRSKEKEFELELWQRRASLDEELKGKVLELEKKEAEVNHMEEKIKKREQVVEKKTEKVKEKEKDHELKLKALKEKEKSLKNEEKILGTERKQLDSEK…	0	14.437	0	4.41989	4	4	4	0.157	NA	0	NA	NA	5.64	2.11786	2	2	NA	0	NA	NA	6.27	2.30203	2	2	NA	0	NA	NA	0	1	0	1	0	2	Sporadic	ITAG only
Solyc02g090030	Oxygen-evolving enhancer protein 1 of photosystem II (AHRD V1 ***- A8J0E4_CHLRE); contains Interpro domain(s) IPR002628 Photosystem II manganese-stabilizing protein PsbO	AT3G50820	MAASLQAAATLMQPTKVGGVSARNNLPLRSAQSLSKAFGLEPSASKLSCSLQADLKDFAQKCTDAAKIAGFALATSALVVSGANAEGVPKRLTFDEIQSKTYMEVKGTGTANQCPTIDGGVDSFSFKPGKYNAKKFCLEPTSFTVKAEGVSKNSAPDFQKTKLMTRLTYTLDEIEGPFEVSPDGTVKFEEKDGIDYAAVTVQLPGGERVPFLFTIKQLVASGKPESFSGDFLVPSYRGSSFLDPKGRGGSTGYDNAVALPAGGRGDEEELQKENVKNTASLTGKITFTVTKSNPQTGEVIGVFESIQPSDTDLGAKTPKDVKIQGIWYAQLES	0	85.426	0	32.7327	15	309	3	13.125	118.45	32.7327	14	49	147.61	30.9309	13	63	154.51	30.9309	14	61	164.2	29.1291	13	69	164.89	30.9309	14	67	1	1	1	1	1	5	WTSP	Detected by both ITAG and Atlas
Solyc02g090100	Unknown Protein	AT2G23670	MSSTTTSLTVRTYPPRCVLNANTNPPTKQAAVALRGRRQLISLVTATTVVKALEMPSKAADIGLFGLRKKLKKVEDEAEELVKEGFEAADKGIAAAEKGIEAAEKGLLTAEKGIEAAEEKIESTVSFGGLAQAGAVAGAEFVGVLIAGAVVNGILGPEPQKS	0	15.454	0	16.0494	3	9	3	1.154	3.15	6.79012	1	1	4.16	6.79012	1	1	9.65	16.0494	3	3	7.54	6.79012	2	2	7.28	6.79012	1	2	1	1	1	1	1	5	WTSP	ITAG only
Solyc02g090230	Nucleoporin p58/p45 (AHRD V1 ***- B4FHB0_MAIZE)	AT4G37130	MAFTFTPQAQQPSLFQTPGQQQASPFQTPGQQQSSPFQTPGQQQASPFQTPGQQQPSPFSQITPFSQPQQQQQQLQFQQQQQQLQQQQQLQLQQQLQLQQQQQQLLQQQQSSQQQQLYLFTNDKTPATYSTKWTDLHPDSQKLLLQIEERILEYRDESQRLDQCSRLYDSSVSNDGFELDASRSIQELGGISTSMERQKAILQELMIVVKDMLRNTEVAVRSFMMLRPKFLHQSAPATASATAPSQASGATVAPTASGSAQSTPNAAIFDFYSGIPKKPSPFLQQTVARFEKYLVECRQWVEELEQLMALDSDRNSMNSNSSLLQSLPNVMSNVHGFFVHVAAKVESIHQYIESMKTAYLADQRRRGDGSDPFLEADRRETAKQEAAAKRVHPTLHLPT…	0.032	1.878	45	2.98507	1	1	1	0.155	NA	0	NA	NA	3.23	2.98507	1	1	NA	0	NA	NA	NA	0	NA	NA	NA	0	NA	NA	0	0	0	1	0	1	1 PSM	Atlas only
Solyc02g090670	Methionine aminopeptidase (AHRD V1 ***- B9H6F3_POPTR); contains Interpro domain(s) IPR002467 Peptidase M24A, methionine aminopeptidase, subfamily 1	AT4G37040	MVGFVSTFLGDCRFINHPHSLRRLFHYKPGNKHVSMQCSRTFSGLTDLLFNRRNVDELPNTNRKRLRPGQISPPRPVPEQIQRPPYVKSRKPPGIGSGSEVHDKKGIEKMRASGRLAAQVLQYAGTLVKPGIMTDEIDQAVHQMIIDNGAYPSPLGYGGFPKSVCTSINECICHGIPDSRPLEDGDIINIDVTVYLNGYHGDTSAMFFAGTVDEEAKNLVQVTKECLDKAISICAPGVEFNKIGKTIHDLADKHRYGVVQQFVGHGVGRAFHSDPVILHYRNNDRGRMILNQTFTIEPMLTIGSIDGVIWGDDWTVVTDDGSLSAQFEHTILITADGAEILTQC	0	26.084	0	11.6279	3	13	3	2.162	3.44	4.06977	1	1	6.62	3.48837	1	3	10.16	7.55814	2	3	11.23	11.6279	3	4	6.39	8.13953	2	2	1	1	1	1	1	5	WTSP	Detected by both ITAG and Atlas
Solyc02g090890	Zeaxanthin epoxidase, chloroplastic	AT5G67030	MYSTVFYTSVHPSTSVLSRKQLPLLISKDFSAELYHSLPCRSLENGHINKVKGVKVKATIAEAPVTPTEKTDSGANGDLKVPQKKLKVLVAGGGIGGLVFALAAKKRGFDVLVFERDLSAIRGEGQYRGPIQIQSNALAALEAIDLDVAEDIMNAGCITGQRINGLVDGISGNWYCKFDTFTPAVERGLPVTRVISRMTLQQILARAVGEEIIMNESNVVDFEDDGEKVTVVLENGQRFTGDLLVGADGIRSKVRTNLFGPSEATYSGYTCYTGIADFVPADIDTVGYRVFLGHKQYFVSSDVGGGKMQWYAFYNEPAGGADAPNGKKERLLKIFGGWCDNVIDLLVATDEDAILRRDIYDRPPTFSWGRGRVTLLGDSVHAMQPNLGQGGCMAIEDSY…	0	147.096	0	35.1271	23	170	23	12.219	85.87	28.2511	19	34	103.21	31.5396	20	39	91.42	30.6428	17	32	102.03	30.0448	18	37	70.66	27.5037	16	28	1	1	1	1	1	5	WTSP	Detected by both ITAG and Atlas
Solyc02g091020	Nucleoporin autopeptidase family protein expressed (AHRD V1 *-*- Q2QX81_ORYSJ)	AT1G59660	MSPPTNSPRRHTRFVAPHPTLRSTHTYMGSSTLPTFGKKYDFNSVANEPLVGTRDVNVSDSSIIGYPRGPAFGVSSNSHFGTPRLDSYSFGQPEVSISGRKGSTPPLFKSSGFGKSTFGINQKGSRIASYTATPGNDITGFRIQSICGMLTYKDKSQEELRFEDYQLGDKGPLDFTMGSSTLPTFGKKYDFNSVSNEPLVCSRDVNVSDSSILGYPRGPAFGVSNNSHFGTPRLDSYSFGQPALSISGSKEERPLKLLCGNDLQTLFDYVIPVISLPNGLSTALFLACGPGTLAFNTTTNAISGLLQNIYRGSSTSQTFGKKYDINRVANEPLLWPGDSNVTDFCAFGPLKAPSFGVSSNSHFGTPSFSSYSFGQPAISMSGIKGKESTLLQNSGFGKS…	0.041	1.741	58	2.34807	1	1	1	0.089	2.17	2.34807	1	1	NA	0	NA	NA	NA	0	NA	NA	NA	0	NA	NA	NA	0	NA	NA	0	0	0	0	1	1	1 PSM	Atlas only
Solyc02g091280	ATP-dependent Clp protease proteolytic subunit (AHRD V1 **** B9H362_POPTR); contains Interpro domain(s) IPR001907 Peptidase S14, ClpP	AT1G66670	MEGSCLTFSTALAPARPSTCLHYNSTFVKQFQTNTITPRRGLSVKASTHKPTLSTNWDVSSYSKAPAWMPRFEELDTTNMLLRQRIIFLGSQVDDITADFIISQLLILDAEDDKKDIRLIINSPGGSVTAGMGIYDAMKMCKADVSTICMGLAASMGAFLLASGSKGKRYCMPNAKVMIHQPLGTSGGKATEMGIRIREMGYHKMKLNKILSRVTGQPLEKIEVDTDRDNFMNAWESKEYGLVDAVIDDGKPGLVAPITEDAPPPKTRVWYKWKAEGTRKRKNNWPSEEKLFQNDEQSNEQKDEALSPL	0	28.194	0	19.0939	6	30	6	3.125	19.54	14.2395	4	7	12.44	10.356	3	6	15.29	15.2104	5	8	15.95	12.945	4	6	7.57	8.73786	3	3	1	1	1	1	1	5	WTSP	Detected by both ITAG and Atlas
Solyc02g091290	Methionyl-trna formyltransferase (AHRD V1 ***- B9GV84_POPTR); contains Interpro domain(s) IPR005794 Methionyl-tRNA formyltransferase	AT1G66520	MLSSSVMIRRFCSFNVTASSSAITSTTKKKRLVFLGSPQVSASVLDALFNASAAPDSLFEITAIVTQPPSGRDRGRKVMPSPVAQHALDRGFPSDLIFTPVKAGEEAFLFNFKSLEPELCVTAAYGNILPTKFLNIPSKGTVNIHPSLLPLYRGAAPVQRALEDGVKETGVSLAYTVRKLDAGPVIACERVTIDDQIKAPDLLDLLFNLGSKLLIRELPSIFDGSASGIAEEQDDSKATLAPKITPEESWLSFDDDAQVLHNKVRAFAGWPGTRARLKVIDPNNGESSIIELKIITTRIYGGINSQDIEANDVLFTKSSLVIPCGGGTALEVLEIQLPGKRAVNAAAFWNGLRGQMLKKL	0	22.652	0	16.3889	5	11	5	1.581	8.45	8.88889	3	3	NA	0	NA	NA	7.92	10.5556	3	3	8.69	10.5556	3	4	2.68	3.61111	1	1	1	1	1	0	1	4	WTSP	Detected by both ITAG and Atlas
Solyc02g091340	Pyridoxal kinase biosynthesis, pyridoxal kinase	AT5G37850	MARPPILALAIPSDTGRVLSIQSHTVQGYVGNKSAVFPLQLLGYDVDPINSVQFSNHTGYPTFKGQVLNGEQLWELIEGLEANGLLYYTHLLTGYIGSVSFLNTVLKVVDKLRSVNPKLKFVCDPVMGDEGKLYVPPELVTVYREKVVPVASMLTPNQFEAEQLTGSRITSEKDGQEACNILHAAGPSKVVITSINIDGTLLLIGSHQKEKGQSPEQFKIVIPKIPAYFTGTGDLTTALLLGWSNKYPDDLDKAAELAVSSVQALLLRTLADYQKVGYDCQSSSLEIRLIQSLDDIRNPEVKYRAKRYN	0	9.84	0	5.17799	1	5	1	0.52	7.37	5.17799	1	2	NA	0	NA	NA	4.51	5.17799	1	1	NA	0	NA	NA	6.34	5.17799	1	2	1	0	1	0	1	3	WTSP	ITAG only
Solyc02g091490	Fructokinase 3 (AHRD V1 **-* Q6VWJ5_SOLLC); contains Interpro domain(s) IPR011611 Carbohydrate/purine kinase	AT1G66430	MALHATAFSFTGVSTSSKSSRSALLSVFPLPRRCTVKATSQYPHSFPRCKIQGRALPSDNGLVEKDESSLVVCFGEMLIDFVPTTSGLSLAEAPAFKKAPGGAPANVAVGISRLGGSSAFIGKVGEDEFGYMLAEILKENNVNSDGMRFDPGARTALAFVTLRKDGEREFMFYRNPSADMLLQEDELDLELIRKAKVFHYGSISLITEPCKSAHIAAAKAAKDAGVILSYDPNLRLPLWPSAESAREGILSIWNTADIIKISEEEISFLTQGEDPYDDNVVRKLYHPNLKLLLVTEGPEGCRYYTKDFSGRVKGIKVDAVDTTGAGDAFVAGILSQLASDVSLLQDEGKLRDALSFANACGALTVMERGAIPALPTKEVVLNALLKSVA	0	68.48	0	29.3059	11	106	9	4.179	60.81	21.5938	8	19	71.71	29.3059	11	24	87.56	20.8226	8	29	66.76	20.8226	8	23	36.07	12.5964	5	11	1	1	1	1	1	5	WTSP	Detected by both ITAG and Atlas
Solyc02g091530	5_apos-AMP-activated protein kinase subunit beta-1 (Fragment)	AT5G39790	MNISILLRQSEIWKSVVIYERYKSDRIVIEKNILFMNLISAIAAELGIDESKKDIEIRYVVEGVALPCNCCFEFHQLGRNSLIMDCNLLNSLGQTCFPRFKVENIDGVRGNMTSYKSRIGFCRMHTLFSVPNWKLSIPCTSWKIFCAPENSLVVSEKIEDAGLSDPEQVPEQPLRTEELKLLLADAERSKLLKKLSEANRYNRLLKRELQAKEDAMVNFKSELSVTELEIQALARLAEEIAKSAIPAGSRKIKGRYIQSHLFSRLEAISEKLKEQIKGVEAVQAKEVPLSWVGVAESVQVMGSFDGWSQGEHLSPEYTGSYMNFSATLFLRPGRYEIKFLVDDEWKLSPELPTTGEGLTKNNLLVVE	0	28.416	0	19.346	6	17	6	1.404	13.46	12.5341	4	6	9.49	12.5341	4	4	8.8	9.26431	3	3	8.58	9.26431	3	3	3.85	4.90463	1	1	1	1	1	1	1	5	WTSP	ITAG only
Solyc02g091560	Serine hydroxymethyltransferase IPR001085 Serine hydroxymethyltransferase	AT4G37930	MAMAIALRRLSATIDKPVKSLYNGGSIYYMSSLPNEAVYDKEKSGVAWPKQLNAPLEVVDPEIADIIEHEKARQWKGLELIPSENFTSVSVMQAVGSVMTNKYSEGYPGARYYGGNEYIDMAETLCQKRALEAFRLDPAKWGVNVQPLSGSPANFHVYTALLKPHERIMALDLPHGGHLSHGYQTDTKKISAVSIFFETMPYRLDESTGYIDYDQLEKSATLFRPKLIVAGASAYARLYDYDRIRKVCNKQKAILLADMAHISGLVAAGVIPSPFDYADVVTTTTHKSLRGPRGAMIFYRKGVKEVNKQGKEVFYDYEDKINQAVFPGLQGGPHNHTITGLAVALKQATTPEYRAYQEQVLSNSAKFAQALEEKGYELVSGGTDNHLVLVNMKNKGIDG…	0	81.41	0	30.695	17	86	12	6.667	39.88	26.834	13	16	75.5	25.6757	13	26	45.13	22.5869	11	15	68.41	26.2548	13	23	19.44	11.9691	5	6	1	1	1	1	1	5	WTSP	ITAG only
Solyc02g091580	Oligopeptidase A (AHRD V1 ***- Q9LSL3_ARATH); contains Interpro domain(s) IPR001567 Peptidase M3A and M3B, thimet/oligopeptidase F	AT5G65620	MKYRRIGSPLSRILYGSSTTPSLILSLFLILMATRFSLSRSARLCLRPTSTFSRLSTKNLLQCPSCPLWSSSFSLCLHTFRKSTSPGKSITVRSFSPSSASISDHPSKMSMASDDNPLLKDFDFPPFDVIEAKHVRPGIRALLNKIEEELSALEKSVEPTWPKLAEPLEKIIDRLTVVWGAVNHLKSVKDNPELRSALEEVQPEKVAFQLKLGQSKPIYNAFKAIRESPEWDSLSDARKRIVESQIKEAVLSGIALEDDQREQFNKIEQDLAKLSQKFDENVLDSTKKFEKLIIDKKDIDGLPATSLGLAAQTAVSKGHENATAEDGPWIITLDAPSYMSVIQHAKNRTLREEVYRACINRASSGDLDNTEIINQILKLRLEKAKLLGYNNYAEVSMAM…	0	169.042	0	37.6704	28	113	28	8.454	95.09	27.1375	19	32	81.45	23.544	17	25	79.17	24.9071	16	25	48.33	18.3395	13	17	36.18	17.72	12	14	1	1	1	1	1	5	WTSP	Detected by both ITAG and Atlas
Solyc02g091640	Endoribonuclease E-like protein (AHRD V1 **-- Q656E2_ORYSJ)	AT4G37920	MSRLHCLETSIFATANLSLFHTPFSPSAVLPITSTKPASLLFENFKKSASRTPTRTSANNPTTKVLASGVSTAAVDGEADVEVAEGYTITQFCDKMIDLFLNEKPKSKDWRKYLVFREEWKKYGDRFYSRCRTRADTEDDSQMKEKLISLARKVRKIDDEMERHTELLKEIQDNPRDLNAIVTKRRKDFNGEFFRHLSLLSETYNSLEDRDAFARLGTRCLSAVSAYDNTLEIVGTLDTAQAKFDDILNSMSVDAACDKIKSLAKSKELDSSLVLLINGAWASAKESSTMRNEVKEIMHRLYKATQSSLRSMAPKEIKLLKYLLNITDPEERFSALATAFSPGHEHDAKDPNAIYTSPKELHKWIKIMLDAYNMNKEETEIREAKQLDQPMVIQRLSIL…	0.005	3.021	7	2.35294	1	3	1	0.105	NA	0	NA	NA	NA	0	NA	NA	1.9	2.35294	1	1	1.91	2.35294	1	1	2.58	2.35294	1	1	1	1	1	0	0	3	WTSP	Detected by both ITAG and Atlas
Solyc02g091900	Cysteine desulfurase IPR000192 Aminotransferase, class V_Cysteine desulfurase	AT5G65720	MFSKFLTTALRRTVPKPCHGTRRLRLFSTAAAAVGEPYEEDTTGITMKGVKISGRPLYLDMQATSPMDPRVLDAMLPYHISRYGNPHSRTHYYGWESDQQEGFDVTYLPVESDGLVDLEKLRAAIRPDTGLKMNISLMSLSGHKIYGPKGVGALYMRRRPRIRVEPQMNGGGQERGIRSGTVPTPLVVGFGAACELAMKEMEYDEQRIKALQERLLNGIRSKIDGVVINGSVERRYAGNLNLSFAYVEGESLLMGLKEVAVSSGSACTSASLEPSYVLRALGVEEDMAHTSIRYGIGRFSTEQEIDRAVDLTVKQVEKLREMSPLYEMVKEGIDIKSIQWAQH	0	4.504	0	4.08163	1	1	1	0.145	NA	0	NA	NA	3.42	4.08163	1	1	NA	0	NA	NA	NA	0	NA	NA	NA	0	NA	NA	0	0	0	1	0	1	1 PSM	ITAG only
Solyc02g091970	Branched-chain-amino-acid aminotransferase (AHRD V1 ***- Q9SNY8_SOLTU); contains Interpro domain(s) IPR005786 Branched-chain amino acid aminotransferase II	AT3G49680	MEFILQFQKQSHFTSYIGNSAINSGNSFRVASPASDVASELADIDWDNLGFGFMPTDYMYSMKCSQGENFSKGELQRFGNIELSPSAGILNYGQGLFEGLKAYRKHDGNILLFRPEENATRLKMGAERMCMPSPSVEQFVEAVKATVLANERWIPPPGKGSLYIRPLLMGSGAVLGLAPAPEYTFLIYVSPVGNYFKEGLAPINLVVETEMHRATPGGTGGVKTIGNYAAVLKAQSAAKAKGYSDVLYLDCVQKKYLEEVSSCNVFIVKGNLIVTPAIKGTILPGITRKSIIDVAISQGFEVEERQVSVDELLDADEVFCTGTAVVVSPVGSITHQGRRVTYGNDGVGLVSQQLYSALTSLQMGLSEDKMGWIVELK	0	55.659	0	27.0557	9	52	5	6.499	37.9	24.4032	8	15	26.11	15.1194	5	12	21.08	15.6499	5	8	26.68	14.8541	5	10	16.95	15.6499	5	7	1	1	1	1	1	5	WTSP	Detected by both ITAG and Atlas
Solyc02g092470	Formin 3 IPR015425 Actin-binding FH2	AT5G67470	MRAAGLSIFFILSLLSSFTCQFQDLVVKEKNRRILHQPLFPVSSTPPPDSEISPPPPAEPVNSQPFFPEVPTGTTPDQTHQPQVTPANGTPVSNSVATQTAKPVKKVAIAISVGIVTLGMLSALAFYLYKHRVKHPDETQKLVRRNSDQRINEESRTPPSTFLYIGTVEPPAKTSAMTDSNDATGSPYRKLSSVKRMDSRYRPSPDLQPLPPLSKPQPPPSINSPTAMSSSDEESHDTAFHTPQGSTVSNEEGYYTPSLRESYSSNKNYVPYSKRTSPRSRLSDSSAEVKHTMIPSIKQAPVPPLPPRQPQGGLIEQLPPEPPLQYTRPELYVPKRANFSSPPPPPDMTRLQLISNQAQQISKAPPPPPPPPPLPPPPPPLPFSTPHKPEGSQRNVPSA…	0.043	1.454	108	1.79978	1	1	1	0.051	2.64	1.79978	1	1	NA	0	NA	NA	NA	0	NA	NA	NA	0	NA	NA	NA	0	NA	NA	0	0	0	0	1	1	1 PSM	ITAG only
Solyc02g093170	Cyclin delta-3 (AHRD V1 **-- Q94JY0_ARATH)	AT4G34090	MKLGGGVGFGCPRAVAFPGILFSRCRPTFRCYSSSSSPDHVSFIKDVAATQAPEHLNELLKILQVRGEEIISPGAKQGLVPLVIPLSRRSSDSVTALLRWPTAPSGMEMPLVEVRKYGVWLLSKNVDQYIHRVLAEEDANGNQEKVDELFRISAGAGKKLYEKGDFGASKISNIDTYILKKVGLFPDVLERRIKQHFDNGDNISALVTGEFYTKKEHFPGFARPFVFNAEVLLKVGRNIEAKDAARGALKSPWWTLGCEYHEVANMAEWEDEQIEYIKEKVTEEGREADLKKGKQPAQVALDEAAFLLDLASIDGSWDDCAERIAECYKEAGLHEVANFVVYRD	0	67.911	0	39.5349	13	56	13	6.079	37.08	27.907	8	13	32.6	26.4535	8	11	37.32	30.2326	10	15	15.07	14.2442	6	7	24.4	22.3837	8	10	1	1	1	1	1	5	WTSP	Detected by both ITAG and Atlas
Solyc02g093340	Heterogeneous nuclear ribonucleoprotein A3 IPR012677 Nucleotide-binding, alpha-beta plait	no hits	MEEQNGTVNGVKIKLEEEETNDDLRTTPDHQNDAGASQPLTGDGASPGKIFIGGLARETTSAQFVKHFGKYGEIIDSVIMKERRTGQPRGFGFVTYADPSVVDKVIEDDHVINGKQVEIKRTIPRGGGSSSKDFKTKKIFVGGIPTTISEDEFRDFFLKFGEVKEHQIMRDHSTSRSRGFGFITFDTEKSVEDILANGNKLDFSGTQVEIKKAEPKRPNAPQPAPFRRQGNPRAAFGGGFSDAYGGYGDSGYGVVAGPGPGPYRSGGPYGGRSSAFGGYSGGGMGGYGAYGGGGAYGGGFREEASFGYSSRYGSGAFGRGYDVGGGYGGAGEGYGGYGAGGGGYGSGYGAAGLGSGYGGDSAGGSMYGSSRGSYGGAGAGSGRYHPYGR	0.001	4.21	2	2.82776	1	1	1	0.122	NA	0	NA	NA	NA	0	NA	NA	NA	0	NA	NA	3.26	2.82776	1	1	NA	0	NA	NA	0	1	0	0	0	1	1 PSM	ITAG only
Solyc02g093460	tRNA pseudouridine synthase B (AHRD V1 *-*- D0MI93_RHOM4); contains Interpro domain(s) IPR020103 Pseudouridine synthase, catalytic domain	AT5G14460	MAKSVVIPRMSLIFLRSKSISQPRTVFFPSMLNSLLLKSHSLHFFSTTSTPYPLQYEMIISRPANPPSPTLKSRQQRFLPKSKPNDSEPLPGSELGFDDWVDRKLNLKSSSPQAEPQPEEPNSGIMEMDKGKRKYYNKRRKRMFGGSDSEDENNRDKDNELVELKQEVVELPTLHKKEEELYFYDNFAYPWEKDKHYKMVYQLEKKFFPDQGFDKAFLDPGQSNENVNRSKKKLGKKENLIEKDIDGGDGKSLIFFEEEEKSVSSETKKEAKVDVAEKKVEDFFKCLKKVPNKENGVVSAEPFLATRSTGLPPKWDSPGGTVVLVNKPKGWTSFTVCGKLRRLTKVKKVGHAGTLDPMATGLLIVCVGKSTKIVDSYQGMTKGYSGIFRLGEATSTWDA…	0	9.453	0	4.63822	2	3	2	0.16	3.4	2.78293	1	1	5.33	4.63822	2	2	NA	0	NA	NA	NA	0	NA	NA	NA	0	NA	NA	0	0	0	1	1	2	WTSP	Detected by both ITAG and Atlas
Solyc02g093550	Methyltransferase type 11 (AHRD V1 ***- C7QSM0_CYAP0); contains Interpro domain(s) IPR013216 Methyltransferase type 11	AT3G01660	MFLTIVTHSHPKTWKSPNLHLFPLPSKTKTQPSIIITPKAYNNEDNNSTAGKIKRMVLTQQGRTKLNILPDKEFYAYPRFVTHVDDRFISNLTDLYRKCLKPEFEILDLMSSWVSHLPQEVKYKKVVGHGLNAQELAKNPKLDYFFVRDLNEDEKFEFENCSFDAVLCTVSVQYLQQPEKVFAEVFRILRPGGVFIVSFSNRLFYDKAISAWRDSTGYGRVQLVVQYFQCIKGFTEPQVIRKLPTNDDQQNKSPLSKIMQLIGLLSASSDPFYAVIAYRNFKPVHE	0.046	1.623	66	3.14685	1	1	1	0.122	NA	0	NA	NA	NA	0	NA	NA	NA	0	NA	NA	NA	0	NA	NA	1.73	3.14685	1	1	1	0	0	0	0	1	WTSP	Atlas only
Solyc02g093680	Succinate dehydrogenase iron-sulfur protein IPR004489 Succinate dehydrogenase_fumarate reductase iron-sulphur protein	AT3G27380	MATSLIRRAISRVQSSAPAARLLVARAHASDSQAQKVESKPNLKSFQIYRWTPDNPGKPELKEYKIDLKECGPMVLDALIKIKNEIDPTLTFRRSCREGICGSCAMNIDGCNGLACLTKISSDSESTITPLPHMFVIKDLVVDMTNFYNQYKSIEPWLKRKTPAPTPGKEIPQSKSDRAKLDGMYECILCACCSTSCPSYWWNPESYLGPAALLHANRWIMDSRDEYTQERLDAVNDEFKLYRCHTILNCSRACPKGLNPGKHIQNIKKLEMAP	0.002	3.561	4	4.37956	1	2	1	0.136	2.78	4.37956	1	1	3.42	4.37956	1	1	NA	0	NA	NA	NA	0	NA	NA	NA	0	NA	NA	0	0	0	1	1	2	1 Peptide	ITAG only
Solyc02g093940	mTERF domain-containing protein 1, mitochondrial (AHRD V1 *--- MTER1_HUMAN); contains Interpro domain(s) IPR003690 Mitochodrial transcription termination factor-related	AT4G14605	MTSFMQLRIPNAKLAFFSRTSRVPLYRIVLSFPQKVFFCTAKYSESEVDGSFSLRLVPPTLVAAEKEEAKAVLTLFLKKQGLSNALAARAINRSESFIEHLVSRLHSVHKSRYLVGRELTTLEIRDALIPYLEALHEEYGSILVDVVESFPNPPVVEKIEETVEKVPIPVTPASPPSAVLDSKKLKALARVTDIGPTGKLPPHILYLVELGMDIERIRVITRKFPAFAYYSLEGKIKPVVEFLLDLGVPRSQIPTILSKRPQLCGISLSDNLIPTMTFLEELGVDKEQWAKVIYRFPALLTYSRPKLKATVDFLYEMGLSAECVSKVLTRCPNIISYSVEDKLRPATEYFRSMGVDVGVLLYRCPQTFGLSIEANIKPATEFFKDKGFSMTEIATMVSR…	0	28.841	0	17.3554	7	17	7	0.931	7.24	7.02479	3	3	12.67	9.09091	3	4	6.76	8.67769	4	4	7.58	9.50413	4	4	3.43	3.30579	2	2	1	1	1	1	1	5	WTSP	Detected by both ITAG and Atlas
Solyc02g094120	Sulfite oxidase IPR000572 Oxidoreductase, molybdopterin binding	AT3G01910	MPGIKGPSDYSREPPRHPSLKINAKEPFNAEPTRSALISSYVTPVDFFYKRNHGPIPVVDDIERYSVSLSGLIKNSKDLFMKDICKLPKHTVTATLQCAGNRRTAMSKSRTVKGVGWDIAALGNAVWGGAKLADVLELVGIPYLASITQSGGKHVEFVSIDKCKEENGGPYKASIPLSQATNPEADVLLAYEMNGEPLNRDHGYPLRVVVPGVIGARSVKWLDSINIIAEECKGFFMQKDYKMFPPTVNWDNINWSTRRPQMDFPVQSAICSLEDVSVVKHGKINIKGYALSGGGRGIERVDVSIDGGKTWEEATRYQRTGVPYIADDSSSDRWAWVFFEAEANIPQSAEIVAKAVDISANVQPESIDSVWNLRGILNTSWHRVHVRVGQANL	0	5.886	0	3.30789	1	3	1	0.259	3.54	3.30789	1	1	3.23	3.30789	1	1	NA	0	NA	NA	2.52	3.30789	1	1	NA	0	NA	NA	0	1	0	1	1	3	CIP	ITAG only
Solyc02g094150	Sua5/YciO/YrdC/YwlC family protein (AHRD V1 ***- C9KUX7_9BACE); contains Interpro domain(s) IPR004388 Sua5/YciO/YrdC/YwlC	AT3G01920	MIVGVEEMSLEAKALGHSGIAGAVPLSFRRSFSSFPTRLSFHTAVPPQTRRFQSLAVIKRSPKRLKYSAPRLTKEDGLLYVQVDQFGSDSWKLDPVVELLKGGAVGVIPTDTLYAIVCDLSSHSAIERLRRIKEIEPSKPLSIICRSFRDIDTYTTGFPRGNAQGLTDIFRAVKHCLPGPYTFILTASKQLPKQCTRYGSATSKYASRKNVGVRIPDDPVCQAILEKLDRPLISTSVKSPKEDEWILDPVIIADVYGPEGLDFVVDAGVRVADPSTVVDMTESAPRIIRQGKGPKQPWMIAEDDDSPVDE	0	7.374	0	5.16129	1	4	1	0.359	NA	0	NA	NA	NA	0	NA	NA	2.56	5.16129	1	1	3.46	5.16129	1	1	6.07	5.16129	1	2	1	1	1	0	0	3	WTSP	Detected by both ITAG and Atlas
Solyc02g094200	Nuclear transport factor 2 IPR018222 Nuclear transport factor 2, Eukaryote	AT1G27970	MDPDSVAKAFVDHYYSTFDSNRAGLANLYQEASMLSFEGVQIQGAQSIVAKLTSLPFQQCKHHINTVDCQPSGPAGGMLVFVSGNLQLPGEQHALKFSQMFHLMPTPQGSFYVLNDIFRLNYA	0.002	3.671	3	11.3821	1	1	1	1.154	NA	0	NA	NA	3.34	11.3821	1	1	NA	0	NA	NA	NA	0	NA	NA	NA	0	NA	NA	0	0	0	1	0	1	1 PSM	ITAG only
Solyc02g094420	Shikimate kinase (AHRD V1 ***- B9N0W2_POPTR); contains Interpro domain(s) IPR000623 Shikimate kinase	AT3G26900	MKVVQLAQPFVVPTFCHHLKPPRAVSKHNHDFTISLTLKRKAAEISPDLKGTCLFLVGINSSIKSNSAQLLADALRYYYFDSDSVVEQALGGKDAVRSFMKTDLKGFRDSETEVLKQLSSMGRLVVCAGNGAVQCAANLALMRHGISIWIDVPLDMVAKQIVEEKFQLPAAEAINGSYSEVLTQLTAIYEDSRNGYATADTTIALQNTASRLGYDTLDAVTTEDMVLETLKEVERLMRSKKLMEEAARPF	0	20.793	0	28.8	5	10	5	1.61	6.03	10.4	2	2	5.39	8.4	2	2	3.03	6.4	1	1	3.14	7.2	1	1	11.02	20.4	3	4	1	1	1	1	1	5	WTSP	Detected by both ITAG and Atlas
Solyc02g094430	Hydrolase alpha/beta fold family protein (AHRD V1 **-- D7L9I6_ARALY); contains Interpro domain(s) IPR000073 Alpha/beta hydrolase fold-1	AT3G26840	MEAISAGTYTAAGVSPLLQSRNSCLRITSARFKIASTAATTGRSTASIGQQPPTVPMSIVDSSELEQTTTLNMKDFMKWSKDMIASGSEGGPPRWFSPLDCAAPLKDSPLLLYLPGIDGVGLGLIKHHKRLGKIFNIWCLHVPVTDRTSFSDLVYLVEATVRSEHHHAPRRPIYLLGESFGGCLALAVAARNPHIDLALILANPATRLRESQLENLITLCEVIPEQLHPSMVKLLSVTTGVPARLAVAIPGSGHSLQQAVAELFRGDVAFSSYLSVLADVLPVETLIWRLKILKSAASFVSSRLHAVRSQTLVLSSGKDHLISSPEESEKLHKMLPNCEIRKFNNSGHALLLEADFNLVTVIMGANFYRRGRHLDFVRDFVPPSTSEFDSVYQPYRWME…	0.005	3.033	7	1.75182	1	2	1	0.101	NA	0	NA	NA	NA	0	NA	NA	NA	0	NA	NA	2.8	1.75182	1	1	2.8	1.75182	1	1	1	1	0	0	0	2	WTSP	Detected by both ITAG and Atlas
Solyc02g094640	Acetyl-coenzyme A synthetase IPR011904 Acetate--CoA ligase	AT5G36880	MYQRSVHDPSGFWSDIASEFYWREKWGQQVYCENFDVRKGKIKIEWFKGGMTNICYNCLDRNIESGKGDKTAIYWEGNEPGLDSSMTYNQLLARVCQLANYLKDVGVHKGDAVVIYLPMLMELPIAMLACARIGAIHSVVFAGFSAESLAQRIIDCRPKVVITCNAVRRGSKIIYLKEIVDSALLESAQKGIVTDVCLTYENESAMKKEMTKWTKGRDIWWQDVILKYPVTCDVEWVDAEDPLFLLYTSGSTGKPKGVLHTTGGYMVYTATTFKYAFDYKPTDIYWCTADCGWITGHSYVTYGPLLNGATVVVFEGAPNYPDVGRCWDIVDKYKVSIFYTAPTLVRSLMREGDEHVSRYSRKSLRVLGSVGEPINPSAWRWFFNVIGDARCPISDTWWQ…	0	59.736	0	17.9081	11	67	6	3.217	48.24	17.9081	10	16	49.76	14.2631	9	16	42.51	16.1648	9	15	39.53	12.0444	6	12	23.34	8.8748	4	8	1	1	1	1	1	5	WTSP	ITAG only
Solyc03g005000	Peptidase M48 Ste24p (AHRD V1 ***- B6TA12_MAIZE); contains Interpro domain(s) IPR001915 Peptidase M48, Ste24p	AT3G27110	MASLCFSPSVLSCKIKPPITGFRKQRLSLFVCRAASLPFRDLDADDFRHPLDRQNTLLLRAIPGLKDIGKALLGTVSEQIMLLENIGTSVLVSEDQLPELHYLMVEASRILNIEAPDLYIRQSPVPNAYTLAVSGKKPFVVVHTSLVELLSRNELQAVLAHELGHLKCDHGVWLTFANVLTLGAYTVPGVGSLIAQRLEEQLLRWLRAAELTCDRAALLVAQDPKVVVSVLMKLAGGCPSLSDQLNVDAFLEQARSYDKASSSPVGWYIRNAQTRQLSHPLPVLRAREIDEWSRSQEYRSLLQRAIQVNPVQKV	0	6.314	0	8.9172	3	6	3	0.438	NA	0	NA	NA	NA	0	NA	NA	1.76	2.54777	1	1	5.25	5.73248	2	3	0	5.73248	2	2	1	1	1	0	0	3	WTSP	Detected by both ITAG and Atlas
Solyc03g005190	Ferredoxin (AHRD V1 *-*- Q8LD29_ARATH); contains Interpro domain(s) IPR010241 Ferredoxin [2Fe-2S], plant	AT4G14890	MAPNSIKKLRKLPHVFSKVLQLPIPSDADVEVVENPDFFRFMAKMDQHGENIRNVRAQTVEIHPGITKIVVVRNGGEAMLDQLNVDTWRFRLPTSTKPELATAAFADGELIVTVPKGVNGRGGKDVLLIHTNKTLTLTFSSLTMATIQLTTSPSLTLIPSRKQANLAAIKLNSPWSVRRRENRRVSSVVRAYKVIVEHEGKTTELEVEPDETILSKAIDVGMSVPYDCKLGVCMTCPAKLLSGNVDQSEGMLSDDVVERGYALLCAAYPRSDCHIRVIPEEELLSLQLATADD	0	12.616	0	13.6519	3	8	3	0.54	8.58	13.6519	3	3	6.17	10.9215	2	2	3.97	5.11945	1	1	4.54	5.11945	1	1	4.69	5.11945	1	1	1	1	1	1	1	5	WTSP	Detected by both ITAG and Atlas
Solyc03g005230	Menaquinone biosynthesis methyltransferase ubiE (AHRD V1 *-** A1BDQ8_CHLPD); contains Interpro domain(s) IPR013216 Methyltransferase type 11	AT3G63410	MASSILSGSDNFKLLSGISPSGSSFLGSELNLKCLPQKGFVNLRATRTLRPTKCSLSASRPASQPRFIQHKKEAFWFYRFLSIVYDHVINPGHWTEDMRDEALEPAELHARNLQVVDVGGGTGFTTLGIVKHVDAKNVTIIDQSPHQLAKARQKEPLKECKILEGDAEDLPFPTDTFDRYISAGSIEYWPDPQRGIKEAYRVLTIGGVACLIGPVYPTFWLSRFFADVWMLFPKEEEYIEWFKKAGFTQVKLKRIGPKWYRGVRRHGLIMGCSVTGVKPYAGESPLQLGPKVEDVSKPVNPFVFLMRFLLGIMAASYYVLVPIYMWIKDQIVPKGQPI	0	19.038	0	18.0473	4	11	3	0.931	5.57	8.57988	2	2	12.51	18.0473	4	4	4.6	7.98817	2	2	5.21	7.98817	2	2	2.3	3.5503	1	1	1	1	1	1	1	5	WTSP	Detected by both ITAG and Atlas
Solyc03g005260	Sulfate adenylyltransferase (AHRD V1 **** Q43183_SOLTU); contains Interpro domain(s) IPR002650 ATP-sulfurylase	AT3G22890	MAAISSLSLKTPTKIQSLTKTHYSIPLNLPFSCRSKSKRTGSIGSRTRIRCGLLIEPDGGKLVELFVEESQRELKREDALKLPKIKLTKIDLEWVHVLSEGWASPLKGFMREDEFLQTLHFNSIRLEDGSVVNMSVPIVLAIDDSQKNLIGGSTSVALVDDENNPTAILSDIEIYKHNKEERIARTWGTTAPGLPYVDEAITHSGDWLIGGDLKVIDPVKYNDGLDRFRLSPAELRDEFTRRNADAVFAFQLRNPVHNGHALLMTDTRRRLLEMGYKNPVLLLHPLGGYTKADDVPLHWRMKQHEKVLEDGVLDPETTVVSIFPSPMHYAGPTEVQWHAKARINAGANFYIVGRDPAGMSHPLEKRDLYDADHGKKVLSMAPGLERLNILPFRVAAYDK…	0	112.155	0	36.8308	18	124	9	12.335	90.4	32.9764	15	31	88.03	31.6916	13	28	69.79	35.3319	15	25	49.33	27.8373	12	17	66.9	28.6938	13	23	1	1	1	1	1	5	WTSP	Detected by both ITAG and Atlas
Solyc03g005340	Prolyl endopeptidase (AHRD V1 *-** C0NUP9_AJECG); contains Interpro domain(s) IPR001375 Peptidase S9, prolyl oligopeptidase active site region	AT4G14570	MTNILSPLAAIRTHSIVSVLLHSHRFPPLSSETRLLKQHRPISCRPFWLTKQSFSVFSKMDCVGASSPKEFPLGLDASLEEEYFSQSSLLQDFTSIPNIDKAWTFTSDGGSQGMFSISQPNLLANKKRRYILPCHISKESTNAVSFQWAAFPIEMSNVSMMIPSPSGSKLLVVRNPENDSPTKFEIWGSSLVEKEFYVPASVHGSVYSDGWFEGISWNSDETLIAYVAEEPAPSKPTFTTFGYKKDNSTDKECGSWKGQGDWEEEWGETYAGKRQPALFIIDVNSGVVRPVEGIGKSLSVGQVVWAPSREGLEQYLVFVGWPSDNRKLGIKYCYNRPCALYAVKAPFSKVEVHQSGTNAAKDVSPIKLTQSISSAFFPRFSPDGKLLIFLSARSSVDSW…	0	20.92	0	6.6345	4	10	4	0.311	10.61	5.18697	3	3	8.02	4.58384	3	3	4.35	1.93004	1	1	7.48	3.13631	2	2	4.51	1.93004	1	1	1	1	1	1	1	5	WTSP	Detected by both ITAG and Atlas
Solyc03g005370	Unknown Protein	no hits	MTDLLVYVVERMYTTNNDKTILGFCQLEASWQHILFSKKTNKISFAVFRLCFHCL	0.053	1.377	134	12.7273	1	1	1	0.778	NA	0	NA	NA	1.66	12.7273	1	1	NA	0	NA	NA	NA	0	NA	NA	NA	0	NA	NA	0	0	0	1	0	1	1 PSM	ITAG only
Solyc03g005680	RNA-binding protein-like IPR012677 Nucleotide-binding, alpha-beta plait	AT4G14300	MDSDQGKLFIGGVSWETSEEKMKEYFQGYGDVVQTVVMRDKITGKPRGFGFVVFADPSVIDRVLQDTHVIDGRTVEAKRALSREEQQGPKSGNMGGGRSFGGSGNTRTKKIFVGGLPPTLTEDDFRIYFETYGNVTDVAIMYDQQTNRPRGFGFISFDSEDAVDRVLHKAYHDLSGKQVEVKRALPKDSNSGFGGRSTGNGGSGMGGGSYQGYGDNPSSYDRMDTNRYMQSQNTGGGYPSYGSSGYGTAGYGYGSSNNGMGYGAYGSYGGANPGYGGVNPGYGGAAGAAFGNPNVPGTGYGSGQAGGPRSSWGSQVSSGYGNMGYGNVSWGASSAGGGGGPANGGSAAGQSPTGATGYGNQGYGYGGYGGNDGSYGGGASGDMQSGGGYMGSGYGDASG…	0.003	2.703	7	2.57611	1	1	1	0.194	NA	0	NA	NA	2.82	2.57611	1	1	NA	0	NA	NA	NA	0	NA	NA	NA	0	NA	NA	0	0	0	1	0	1	1 PSM	ITAG only
Solyc03g005730	3-isopropylmalate dehydratase large subunit 2 (AHRD V1 ***- B6U6T6_MAIZE); contains Interpro domain(s) IPR011826 Homoaconitase/3-isopropylmalate dehydratase, large subunit, prokaryotic	AT4G13430	MAASSAIASSSTTFINKKDVGLSAFSSQASFSVQTARKRISKRIVSVMTPQQTERKPATTGSVKTGMTMTEKILAKASDKPDVSPGDNVWVNVDVLMTHDVCGPGSIGIFKKEFGQNAKVWDREKLVIIPDHYIFTTDERANRNVDILRDFCNEQNIKYFYDIKDLGNFRANPDYKGVCHVALAQEGHCRPGEVLLGTDSHTCTAGAFGQFATGIGNTDAGFVLGTGKILLKVPPTLRFVMDGEMPDYLLAKDLILQIIGEISVAGATYKAMEFVGTTVESLTMEERMTLCNMVVEAGGKNGVIPADKTTYDYLEGRTSVPYEPVYSDEGARYLKEYRFDVSKLEPLVAKPHSPDNRALARECKDVKIDRVYIGSCTGGKTEDFMAAAKVFLASGKKVK…	0	85.702	0	28.6837	12	93	9	3.262	63	28.6837	11	22	51.52	17.6817	6	17	64.95	26.9155	9	21	62.77	23.7721	10	21	32.08	17.2888	7	12	1	1	1	1	1	5	WTSP	Detected by both ITAG and Atlas
Solyc03g005780	Chlorophyll a-b binding protein 3C-like (AHRD V1 **** Q2XTE0_SOLTU); contains Interpro domain(s) IPR001344 Chlorophyll A-B binding protein	AT1G29930	MATSTMALSSSTFAGKAVKLSPSSSEITGNGRVTMRKTATKAKPASSGSPWYGPDRVKYLGPFSGESPSYLTGEFPGDYGWDTAGLSADPETFAKNRELEVIHCRWAMLGALGCVFPELLARNGVKFGEAVWFKAGSQIFSEGGLDYLGNPSLVHAQSILAIWACQVVLMGAVEGYRIAGGPLGEVVDPLYPGGSFDPLGLADDPEAFAELKVKEIKNGRLAMFSMFGFFVQAIVTGKGPLENLADHLADPVNNNAWAFATNFVPGK	0	5.797	0	8.61423	2	5	1	0.931	2.54	2.99625	1	1	2.3	2.99625	1	1	2.7	2.99625	1	1	2.35	2.99625	1	1	3.32	5.61798	1	1	1	1	1	1	1	5	WTSP	Detected by both ITAG and Atlas
Solyc03g006140	Neutral ceramidase IPR006823 Neutral_alkaline nonlysosomal ceramidase	AT1G07380	MIWLVLLLLLSQGNGKGGVEASDYLIGLGSYDITGPAADVNMMGYANMEQIVSGVHFRLRARTFIVAEPQGKRVVFVNLDACMASQIVTIKVLERLKARYGNLYTEKNVAISGIHTHAGPGGYLQYVVYIVTSLGFVRQSFDAVVNGIEQSIIQAHENLRPGSIFVNKGELLDAGVNRSPSAYLNNPAGERGKYKYNVDKEMTLLKFSDDEWGPVGSFNWFATHGTSMSRTNSLISGDNKGAAARFMEDWYDQRNTEPSKFNVSKASELPRRVSNIIPSVRGKHHELLEIAASFQSSPGKPVTRLMSVARRVRSALRLADRPKFVSAFCQSNCGDVSPNVLGTFCIDTGLPCDFNHSTCGGKNELCYGRGPGYPDEFESTRIIGERQFKKAVELFDTAT…	0	13.121	0	6.93717	4	7	4	0.274	NA	0	NA	NA	6.26	3.27225	2	2	3.36	1.70157	1	1	10.41	5.49738	3	3	3.8	1.70157	1	1	1	1	1	1	0	4	CIP	ITAG only
Solyc03g006540	Unknown Protein (AHRD V1)	AT2G01755	MANMLNHRILFQCNNSQCLPYLLPCYFPNHNSNSIQTIFSLSQSSSLLTSHKSTVKRSLSIVICHARRRIIYDNDDDEKEDNNNSELAMLEFYSQTMRNEALLVKALVDEEDVEVLIFKGFSSCLSCRTSPDPSKSVLPARAVIKCIDRIKGPFDPSNIVYLEKGLTLEAFKDRILPRAK	0	10.515	0	13.3333	3	7	3	0.995	7.77	13.3333	3	3	2.6	12.2222	2	2	0	5.55556	1	1	1.75	4.44444	1	1	NA	0	NA	NA	0	1	1	1	1	4	WTSP	Detected by both ITAG and Atlas
Solyc03g006870	Phosphoglucomutase (AHRD V1 **** C1MKX8_MICPS); contains Interpro domain(s) IPR016055 Alpha-D-phosphohexomutase, alpha/beta/alpha I, II and III	AT5G51820	MAMESALASTRVSIPSLCSGITSSHHHHRSLSFLSFPKLCSFKYCFRTISTVPFVVSASSVSPSSPSTSVAQSQDLKIKSVPTKPIEGQKTGTSGLRKKVKVFMQDNYLANWIQALFNSLPLEDYKNGLLVLGGDGRYFNREAAQIIIKIAAGNGVGKILVGKDGILSTPAVSAVIRKREANGGFIMSASHNPGGPEYDWGIKFNYSSGQPAPESITDKIYGNTLSISEIKIADVPDVDLSQLGVTKYGNFSVEVVDPVADYLELMENVFDFSLIRSLVSRPDFRFVFDAMHAVTGAYAKPIFVDKLGASLDSIANGVPLEDFGHGHPDPNLTYAEDLVNILYGENGPDFGAASDGDGDRNMILGRSFFVTPSDSVAIIAANAQDAIPYFQSGPKGLAR…	0	80.218	0	28.6392	16	141	16	5.918	55.91	25	14	23	67.16	23.7342	13	27	90.24	25.4747	14	33	80.31	24.2089	14	32	68.17	24.3671	13	26	1	1	1	1	1	5	WTSP	Detected by both ITAG and Atlas
Solyc03g007030	CDGSH iron sulfur domain-containing protein 1 (AHRD V1 ***- B5X1R9_SALSA); contains Interpro domain(s) IPR006622 Iron sulphur domain-containing, CDGSH-type, subfamily	AT5G51720	MASTTSIIQPGFSCGGALSSFTAKPRRVVMVRAQAINPDIKKDEAKVVDSVLVTELSKPLTAYCRCWRSGTFPLCDGSHVKHNKETGDNVGPLLLKKQ	0	9.291	0	24.4898	2	5	2	3.642	4.92	15.3061	1	1	1.87	9.18367	1	1	2.35	9.18367	1	1	1.78	9.18367	1	1	2.24	9.18367	1	1	1	1	1	1	1	5	WTSP	Detected by both ITAG and Atlas
Solyc03g007110	ATP-dependent Clp protease ATP-binding subunit ClpC (AHRD V1 *-*- D6KVC7_SCAIO); contains Interpro domain(s) IPR004176 Clp, N-terminal	AT4G25370	MATHSFSLLPIQSLTSNSSNKQSENTNTFLTHKYCKALATSFTGGKLLIRPQNLNSVTPKRRRSTVATVAFSLPITKPEGYEKQPKWSSRAIQAFVMAELEARKIKYPSTGTEALLMGILVEGTSLAAKFLRANGITFFKVSEETLKLLGKSDMYYSNPESPPLTKPARKALDWAVNEKLKSGEDGEITVTHIVLGIWSVKESAGHIIMSTLGFDDEKAKELAKFMDKDSELTYK	0	49.735	0	25.1064	6	44	6	26.826	31.85	21.7021	5	10	16.98	21.7021	4	5	36.82	21.7021	4	11	32.3	25.1064	5	11	23.23	21.7021	4	7	1	1	1	1	1	5	WTSP	Detected by both ITAG and Atlas
Solyc03g007170	FK506-binding protein 4 (EC 5.2.1.8)(Peptidyl-prolyl cis-trans isomerase)(PPIase)(Rotamase) IPR001179 Peptidyl-prolyl cis-trans isomerase, FKBP-type	AT3G12340	MAFWGVELKSGKPFTHNFEKERGRLHISQATLGSGSSNKKCIVQCKVGDKEPIYLCSLLPEKLETCPLNLEFEEDDDVTFSVVGSHSVHLSGFFYGESEDCCGDEHGSDYEEGASETDSASDDSFEFNYDTEDEDGSTDDDDFSMYPPSPIPNSGVRIEEILEDEKPADENGTSKKPKKKKNHSNGIDDSERQIVVKGNTESPLMESEDEDGFPISAPSENKTKSVRSQKSDGTKDQDTGEEAGEKKGLKKRLRDDTGKDNDQQGKDNAKQNKKNKKKKVVDGEELDHEDVLKRSANPEHVEGNDEAFSVGKTEDGQKPTNEKDTEKKKKKKKNKKNQQDGKAVTEVEKDKKNESQEENAGTKPSHARTFGNGLVIEELAMGKPDGKKASPGKKVGVRY…	0.004	2.542	9	3.125	1	1	1	0.122	NA	0	NA	NA	NA	0	NA	NA	NA	0	NA	NA	3.44	3.125	1	1	NA	0	NA	NA	0	1	0	0	0	1	1 PSM	ITAG only
Solyc03g007190	SPFH domain _ Band 7 family protein IPR001107 Band 7 protein	AT5G51570	MGNVNCVFCGCIEQASVGVVEKWGRFDRLAEPGLNFWNPLAGECLTGTLSTRINSLDVKIETKTKDNVFVQLLCSIQYRVIRQNADDAFYELQNPTEQIQAYVFDVVRAHVPKMNLDELFEQKDEVAKAVLEELEKVMGAYGYNIEHILMVDIIPDASVRRAMNEINAAQRMQLASVYKGEADKILQVKKAEAEAEAKYLGGVGVARQRQAITDGLRENILNFSHKVEGTSAKEVMDLIMITQYFDTIKDLGNSSKNTTVFIPHGPGHVRDIGDQIRNGLMEAASAKDAE	0.004	2.375	9	3.10345	1	1	1	0.155	0	3.10345	1	1	NA	0	NA	NA	NA	0	NA	NA	NA	0	NA	NA	NA	0	NA	NA	0	0	0	0	1	1	1 PSM	ITAG only
Solyc03g007330	Cell division protease ftsH homolog (AHRD V1 *-*- FTSH_RICTY); contains Interpro domain(s) IPR005936 Peptidase M41, FtsH	AT5G53170	MTTLQASLLFKPLPPLLHFSSSKHVRSLSFANALSCRRLSTTASAPFKTRFCRHNLLLHCTLNPEQVDSSSEFALSNNDDNSIPEMEPIEFNEPSVVQIGSVQNSSIDSNAGVVSSSFSDNEAASEVLVENDELKKKLPILVFLMGVFAKVKKGFENILLSDWFSWWPFWHQEKRLERLIADADANPNDAAMQSALLAELNKHSPESVIRRFEQRAHAVDSRGVAEYMRALVATNAIAEYLPDEQSGKPSSLPSLLQELKQRASGNMDEPFLNPGISEKQPLHVVMVDPKVSNRSSRFAQEFLSTIIFTIAIGLVWIMGATALQKYIGGLGGIGASGVGSSSSYAPKELNKEIMPEKNVKTFKDVKGCDDAKQELEEVVEYLKNPSKFTRLGGKLPKGI…	0.012	2.334	16	1.47783	1	2	1	0.077	NA	0	NA	NA	NA	0	NA	NA	2.34	1.47783	1	1	2.48	1.47783	1	1	NA	0	NA	NA	0	1	1	0	0	2	WTSP	Detected by both ITAG and Atlas
Solyc03g007540	Unknown Protein (AHRD V1)	AT5G52960	MSTISATFFRSLYCIASPPPSTISRFFLPTPLLLPKFRSCPKPLTSSSRKPVACTNSSEEAEVSQTMDEWLQKLPDKTKPLYSHSLPCIEAWLRSLGFYQSRDDRALWFVENPDWQAQLSLDITELHIRYLKRGPGNLEKDVDRRFSYALSREDIENAILGGP	0.003	3.595	4	9.20245	2	6	2	0.778	1.65	9.20245	2	2	1.75	4.29448	1	2	2.17	4.29448	1	1	1.74	4.90798	1	1	NA	0	NA	NA	0	1	1	1	1	4	WTSP	Atlas only
Solyc03g007670	SGT1 IPR007699 SGS	AT4G11260	MASDLETRAKEAFIDDHFELAVDLYTQAITLSPKNPELFADRAQANIKLNYFTEAVVDANKAIELDPTMSKAYLRKGLACMKLEEYQTAKAALEIGASLAPGELRFSKLMKECDEHIAEEAGELPNLSVDKTSASVVAHPASELPDNVAIAPEGAQPTVNQSHQGSAAKPKYRHEFYQKPEEVVVTIFAKGIPAKNVVVDFGEQILSVSIDVPGEETYSFQPRLFGKITPAKCRYEVMSTKIEIRLAKAELLHWTSLEYTTEPVVIQRPIVSSAAPRPSYPSSKLRNVDWDKLEAEVKKEEKDEKLDGDAALNKFFRDIYQDADEDTRRAMMKSFVESNGTVLSTNWKEVGTKKVEGSPPDGMELKKWEI	0.002	3.265	5	3.24324	1	2	1	0.166	0	3.24324	1	1	2.02	3.24324	1	1	NA	0	NA	NA	NA	0	NA	NA	NA	0	NA	NA	0	0	0	1	1	2	1 Peptide	ITAG only
Solyc03g007810	Pyruvate kinase (AHRD V1 ***- A5BTB0_VITVI); contains Interpro domain(s) IPR001697 Pyruvate kinase	AT5G52920	MAQVVATRSIQSSFSSPSHGSLQSQVEKLKPPSLASKVLGRNERSNSCRAVRVNMPQIIARRSTRAEPQVLPVSPEDVPKSEEQEQYLQAIQQLGDTSVGMWSKPTVRRKTKIVCTIGPSTNTREMIWKLAEAGMNVARMNMSHGDHASHQKVIDLVKEYNAQSKDNVIAIMLDTKGPEVRSGDLPQPIMLKPGQEFTFTIQRGVGTADCVSVNYDDFVNDVEVGDMLLVDGGMMSLQVKSKTEESVKCEVIDGGELKSRRHLNVRGKSATLPSITEKDWDDIKFGVDNNIDFYAVSFVKDAAVVHELKNYLKSCGADIHVIVKIESADSIPNLHSIITASDGAMVARGDLGAELPIEEVPLLQEEIINICRSMGKAVIVATNMLESMIVHPTPTRAEV…	0	68.752	0	25.9516	12	46	9	4.484	33.86	17.6471	8	12	20.88	7.95848	4	7	22.98	12.2837	6	8	29.19	14.7059	7	10	22.06	15.7439	8	9	1	1	1	1	1	5	WTSP	Detected by both ITAG and Atlas
Solyc03g007920	Glutamine cyclotransferase-like IPR007788 Glutamine cyclotransferase	AT4G25720	MSLLIRRFVVVGLIVLLSFAVLSEAEASYGAYKVEVINEFPHDPEAYTEGLLYAENDTLFESTGLYGRSSVRKVALLNGKVETVHDMQASDFGEGLALLGESLFQLTWLQDTGFIYDRYNFSKFKKFTHHMQDGWGLATDGKVLFGSDGTSTLYKIDPKTMKVIRKQVVKSQGHEVHYLNELEYVKEEVWSNVYATDCIARISPKDGTVIGWILLQSLREDLKSRGYKYIEVLNGIAWDRDGDRIFVTGKLWPKIFEIKLLPLPPSAPLIREIKNLCMPTPFYLGNLES	0.042	1.468	105	2.07612	1	6	1	0.233	5.1	2.07612	1	3	3.61	2.07612	1	2	NA	0	NA	NA	NA	0	NA	NA	0	2.07612	1	1	1	0	0	1	1	3	1 Peptide	ITAG only
Solyc03g007980	Septum site-determining protein MinD (AHRD V1 ***- D8FVX6_9CYAN); contains Interpro domain(s) IPR010223 Septum site-determining protein MinD	AT5G24020	MLSLQPLNPKPSSLYSSTFTPPNSLSPKTLKPIPAFRPSRNFYPSIHSMLQYNRKPQLAGDTPRVVVITSGKGGVGKTTTTANIGLSLARLGFSVVAIDCDVGLRNLDLLLGLENRVNYTVVEVLNGDCRLDQALVRDKRWSNFELLCISKPRSKLPIGFGGKALVWLVDALKARDEGGPDFIIIDCPAGIDAGFITAITPANEAVLVTTPDITSLRDADRVTGLLECDGIRDIKMIVNRVRTDMIKGEDMMSVLDVQEMLGLPLLGVIPEDSEVIRSTNRGYPLVLNKPPALAGLAFEQAAWRLVEQDSMETVMMEEEPKKRGFFSFFGR	0	8.657	0	9.36556	3	10	3	0.638	0	2.41692	1	2	2.23	5.43807	2	3	4.8	6.34441	2	2	2.41	6.34441	2	2	0	2.41692	1	1	1	1	1	1	1	5	WTSP	Detected by both ITAG and Atlas
Solyc03g019660	Thylakoid lumenal 17.9 kDa protein, chloroplastic (AHRD V1 ***- TL1Y_ARATH)	AT4G24930	MASGISATLLPQFTVKQQNSPCYSTPNFAAEQQQCVPSIWSKVLPLAVAVSLVAPLSSSAIPSLNSKSTPVAPMTPFSQSKNLPTGLENGKIRPCPSVNPGCVSTNPQSSSSAFPLIISQNSSGNAIMQLQDAILKTQKNAKIQVVEDIPDGKYLQAEVDGGFGRDVLEFLVKGDSVAYRAMATKVTYIYPFTTAFGDSKGQEERMEMIAEELGWYAPSLDSMD	0	26.945	0	31.25	6	29	6	6.499	17	26.7857	5	7	20.07	31.25	6	9	3.39	13.3929	3	3	7.75	26.3393	5	6	7	20.0893	4	4	1	1	1	1	1	5	WTSP	Detected by both ITAG and Atlas
Solyc03g019680	CBS domain containing protein (AHRD V1 ***- B6U1W0_MAIZE); contains Interpro domain(s) IPR000644 Cystathionine beta-synthase, core	AT5G50640	MTTSHGGGSLSRRSSLSLTSSTSNLKKKAAAHENGGGQPDSGTRKSMSLSRSMGLTGERTVKRLRLSKALTVPDSTSIYEACRRMAARRVDALLLTDSNALLCGILTDKDIATRVIAREVNIQETPVSKIMTKNPVFVLSDTLAVEALQKMVLGKFRHLPVVENGEVIALLDIAKCLYDAIARLERAAEKGKAIAAAVEGVEKHWGSSVSGSNTFIETLQERMFKPSLSTIISENSKVVIVEPSDTVLATAKKMLESRTSSAIVMVDNKPRGILTSKDMLMRVIAQDLSPESILVERVMTPSPECSTTDTPIVDALHTMHDGKFLHLPVVDKEGTVVAVLDVLHITHAAVSTVGQNAGPNNEAANTMMQRFWDSAMALTPDDDEETRSEGSLKLASEGA…	0.046	1.625	66	1.45191	1	1	1	0	NA	0	NA	NA	NA	0	NA	NA	NA	0	NA	NA	NA	0	NA	NA	0	1.45191	1	1	1	0	0	0	0	1	WTSP	Atlas only
Solyc03g019780	40S ribosomal protein SA IPR005707 Ribosomal protein S2, eukaryotic_archaeal	AT1G72370	MAAITQQPRTLTTKEADIQLMLAAEVHLGTKNCDFQMERYVFKRRNDGIYIINAGKTWDKLHMAARVIVSIENPQDIIVQSARPYGQRAVLKFAQYTGAHAIAGRHTPGTFTNQLQTSYSEPRLLILTDPRTDHQPIKEAALGNIPTIAFCDTDSPMRYVDIGIPANNKGKHSIGVLFWILARMVLQMRGTISPGPKWDVMVDLFFYREPEEAKEQQDEEVPAIADYAEYGGAALGGDWTSSQIPDAQWAADGATSVPAATGDWSGDAVVEGGWDAAAAPPAGVPEVTPAPAAATGWE	0	9.913	0	4.36242	1	5	0	0.389	6.45	4.36242	1	2	3.72	4.36242	1	1	NA	0	NA	NA	6.28	4.36242	1	2	NA	0	NA	NA	0	1	0	1	1	3	1 Peptide	ITAG only
Solyc03g019880	UPF0426 protein At1g28150, chloroplastic (AHRD V1 ***- Y1815_ARATH)	AT1G28150	MSMVLNCVAASPSCATRKWKPAVLGKQLPSGTSPFSVSAKTYGKFRVNAFFFNPIQEPILKEALKEPVAFAGGMFAGLLRLDLNDDPLKEWVSRTVEASGVTAKEIEAGDDQAEDTPQQIEIE	0	21.339	0	26.8293	2	15	2	2.728	19	26.8293	2	5	11.28	26.8293	2	3	15.38	26.8293	2	4	10.57	26.8293	2	3	NA	0	NA	NA	0	1	1	1	1	4	WTSP	Detected by both ITAG and Atlas
Solyc03g019940	Asparaginyl-tRNA synthetase (AHRD V1 **** D6YS69_WADCW); contains Interpro domain(s) IPR004522 Asparaginyl-tRNA synthetase, class IIb	AT4G17300	MAGALSPATTLRLKPFYAVRFFSHYRRPIKVLNPNFYSSYPPQLPPAPYLSRRRSFCSVVSAAISSGEAVERPKFENIEAKEGVKTEKVGEFRKRLRVADIKGGPEEGLDRLGETLVVRGWVRTVRAQSSVTFIDINDGSCLSNMQCVMGSDAEGYDQVENGLISTGASVWIEGTVVSSQGSKQKIELKVQKLVVVGKSDPSFPIQKKRVSREFLRTKAHLRPRTNTFGAVSRVRNALSYATHKFFQENGFVWVSSPIITASDCEGAGEQFCVTTLIPNSNEGGDSPVSAIPTTESGSVDWSQDFFGKRAYLTVSGQLNGETYATALSDIYTFGPTFRAENSNTSRHLAEFWMIEPELAFADLDDDMACATAYLQYVVQHVLENCKEDMDFFDTWIEKG…	0	42.904	0	17.338	13	48	13	2.162	27.95	10.683	8	11	24.7	11.2084	8	11	28.98	11.5587	7	10	15.32	8.75657	5	6	25.11	10.1576	7	10	1	1	1	1	1	5	WTSP	Detected by both ITAG and Atlas
Solyc03g019980	Receptor like kinase, RLK	AT3G47090	MSCIDALSCDGDGLKVTKKNTIYKGYPLLLLDISKMEVFVASFNFHAFLAIHAVFLVFLFSFSLQHAASAAFLGNETDKLALLGFKSQITEDPSRVFVSWNDSVPFCQWTGVKCGLRHVRVIRLNLKGLRLAGTISDHLGNLSFLNSLDLAENAFHDKIPQQLGRLPRLQYLNLSFNYLTGEIPVNLSHCVKLKSLVLEQNTLVGKIPYQVGSLTKLVKLYLRNNNLTGIIPGSIGNLTSLEELYLSYNNLEGEVTASLARLTKLRLLGLSVNSLSGEFPPPLYNLSSLELISLSLNNFSGNLRSDLGNYFPNLQILYLANCQFIGSIPSSLANASKLLELDFPVNNFTGNIPKSFGNLRNLLWLNVWSNRLGYGKHDDLDFVNSLTNCSSLQMLHFGS…	0.05	1.386	127	0.842697	1	1	0	0.08	NA	0	NA	NA	NA	0	NA	NA	NA	0	NA	NA	NA	0	NA	NA	2	0.842697	1	1	1	0	0	0	0	1	1 PSM	ITAG only
Solyc03g025270	rRNA 2_apos-O-methyltransferase fibrillarin IPR000692 Fibrillarin	AT4G25630	MVAPTRGRGGGGFRGGRGDGGGRGGRGGRGGFSGGRGGFGSGGSGMKRGGGRGGRGDRGGRGGGRGRGGMKGGSKVVVEPHRHGGVFIAKGKEDALCTKNLVPGEAVYNEKRISVQNEDGTKVEYRVWNPFRSKLAAAILGGVDDIWIKPGARVLYLGAASGTTVSHVSDLVGPEGVVYAVEFSHRSGRDLVNMAKKRTNVIPIIEDARHPAKYRMLVGMVDVIFSDVAQPDQARILALNASYFLKAGGHFVISIKANCIDSTVPAEAVFAQEVKKLQAEQFKPVEQVTLEPFERDHACVVGAYRVPKKQKAAA	0	12.066	0	12.7389	3	5	3	0.468	NA	0	NA	NA	13.32	6.05096	1	3	NA	0	NA	NA	4.51	6.6879	2	2	NA	0	NA	NA	0	1	0	1	0	2	CIP	ITAG only
Solyc03g025310	Sec-independent protein translocase protein tatA/E homolog (AHRD V1 *-*- D4TUR0_9NOST); contains Interpro domain(s) IPR006312 Twin-arginine translocation protein TatA/E	AT5G52440	MAQINMSRSIFFVRPIYLQDQWRRKQYECRLAEFDSMTTSSLMASALSSSSSSLASSRRVSVTALSFSSISVTHNPKVHFFKWIPYSGLSSWNGLKQLSISKSQFSVKIGRSRKNKGKGVYASLFGVGAPEALVIGVVALLVFGPKGLAEVARNLGKTLREFQPTIRELQDVSREFKSTLEREIGLDDIKGSVQDTRNSSTMSPSSDSSYKNSVADPNGSPSPKLASTAEDDLERMMRIADAEKQAEKDLAALLESRSESQTVSQEVADNSSSSDRAYSTEEYLKISEEQLKAAAQKQSETSTPEQIPFNTQSLSQDSASSADGAYSTEDLSKAAAQQNLSSSQQSPSNAESQSQEAPGEAASMISSSTNPESET	0	26.802	0	12.2667	5	29	5	1.154	23.13	12.2667	5	8	23.01	12.2667	5	8	15.39	12.2667	5	5	9.35	8.26667	3	4	10.76	9.33333	3	4	1	1	1	1	1	5	WTSP	Detected by both ITAG and Atlas
Solyc03g025320	Hydroxycinnamoyl transferase IPR003480 Transferase	AT5G23940	MTKEEIATTNVNILKKSNVKPQKPLGKKECQLVTFDLPYLAFYYNQKLMVYKLGAESFEETVEKLKDGLALVLEDFYQLAGKLGKDDEGVFKVEYDDDMDGVEVIVDEAQEIQVANLTDHHEGINKFQDLIPYNKILNLEGLHRPLLAVQLTKLKDGLAMGLAFNHAVLDGTSTWHFMTSWAQLCSGATSISVPPFLERTKARDTRVKLNLSKPSDAPEHAKSETNGDVSASVDPPMRDRVFKFSESAIDQIKSKVNTNPGEGANNTTPFSTFQSLSAHVWLAVTRARQLKPEEYTVYTVFADCRKRVDPPMPESYFGNLIQAIFTVTAAGLLLSNPIEFAAGMIQQAIAKHDAKAIEERNKEWESSPKIFAYKDAGVNCVAVGSSPRFKVYEVDFGWG…	0	10.761	0	6.63717	2	5	2	0.334	NA	0	NA	NA	NA	0	NA	NA	7.29	6.63717	2	2	7.26	6.63717	2	2	3.08	2.65487	1	1	1	1	1	0	0	3	CIP	ITAG only
Solyc03g025410	Dehydrogenase/reductase SDR family member 13 (AHRD V1 ***- DHR13_BOVIN); contains Interpro domain(s) IPR002347 Glucose/ribitol dehydrogenase	AT4G23430	MWLFKRKGPSGFSSSSTAEEVTHGIDGSGLTAIVTGASSGIGSETSRVLALRGVHVIMAVRNMTSGKDVRDAIVTEIPAAKVDTMELDLSSLASVKKFASDFKSSGRPLNLLINNAGIMATPFMLSKDNIELQFATNHVGHFLLTNLLLEKMKETARKTKREGRIVNVSSEAHRFAYREGIRFDKINDPKSYNSYGAYGQSKLANILHANELTRRLKEDGVEISANSLHPGTITTNLFRHMGIFDGLVGTLGKLLLKNVQQGASTTCYLALNPQVKGVSGEYFSDNNLAKTTALAKDMDLAKRLWDFSMDLIK	0	25.874	0	18.8498	5	18	5	1.894	0	2.8754	1	1	14.2	15.655	4	5	11.07	14.377	4	5	13.61	14.377	4	5	6.34	7.66773	2	2	1	1	1	1	1	5	WTSP	Detected by both ITAG and Atlas
Solyc03g025630	Tripeptidyl-peptidase 2	AT4G20850	MYDTVVLLFYFFNLLCSQSTLNTLLCLLKYWKACFLGAILRINSIISQRVIISAADEVIASIDRDELAKCCALRSDPEDEATEKLKKKMETTRDQLTEALYQKGLALAELEALKGESTVDKVDMFEENFKELKKWVDLKSSKYGILSVFRERHHGRLGTALKVLNDMIQDDGNPPKKKFYELKLSLLDQIGWSHLVAYEKQWMQVRFPSSLPLF	0.004	2.3	9	3.73832	1	1	1	0.179	2.22	3.73832	1	1	NA	0	NA	NA	NA	0	NA	NA	NA	0	NA	NA	NA	0	NA	NA	0	0	0	0	1	1	1 PSM	ITAG only
Solyc03g025740	CCHC zinc finger protein IPR013084 Zinc finger, CCHC retroviral-type	AT5G52380	MVSKRQRIARKRYKEANPELFPKPEPTPPKDPNKKKKKKSTFKKKKGESKDPNKKRSFTKHPFRVAGMKPGESCFICKEHDHIARDCPRKAEWEKNKICLLCRRRGHSLKNCPNKNDEVVDKKLCYNCGETSHSLANCPYPLQDGGTKFASCFICKEQGHLSKDCPKNTHGIYPKGGCCKICGGVTHLARDCPNKSGKASDAAIGRFKISQFEDRPRGQVTKLSSGDDLEDDFNFKADDVNEDDDAKLKKKKEPKVVNFVG	0.002	3.805	3	5.36398	1	1	1	0.179	NA	0	NA	NA	NA	0	NA	NA	NA	0	NA	NA	3.36	5.36398	1	1	NA	0	NA	NA	0	1	0	0	0	1	1 PSM	ITAG only
Solyc03g025850	Remorin 1 IPR005516 Remorin, C-terminal region	no hits	MAELEAKKVEIVDPAPAQEPVEAPKEVVADEKAIVEPAPPPPAEEKEKPDDSKALVVVENKAEEAADEKKEGSIDRDAVLARVATEKRLSLIKAWEESEKSKAENKAQKKVSAIGAWENSKKANLESELKKMEEQLEKKKAIYTEKMKNKIALLHKEAEEKRAMIEAKRGEDLLKAEELAAKYRATGTAPKKILGIF	0	9.684	0	16.2437	3	6	3	0.438	NA	0	NA	NA	7.04	16.2437	2	2	NA	0	NA	NA	7.71	9.13706	2	2	6	9.13706	2	2	1	1	0	1	0	3	CIP	ITAG only
Solyc03g026210	Dihydrodipicolinate reductase family protein (AHRD V1 ***- D7MRM8_ARALY); contains Interpro domain(s) IPR011770 Dihydrodipicolinate reductase, bacterial and plant	AT5G52100	MAVLSCQTYFINSKKIIKTKPFICCSSSQNNNVKVIINGAAKEIGRAAVIAVTKARGMELAGAVDSNFVGQDIGQVCDMEEPLEIPIINDLTMVLGSISQLKATGVVIDFTDPSTVYDNVKQATAFGMNSVVYVPRIKQETVMALSMLCDKASTGCLVAPTLSIGSILLQQAAISASFHYNNVEIVESRANPLDFPSQDAVQIANNLSNLGQLYNRDDISSDIPARGQVLGEDGVRVHSLVLPGLPSSTSVYFSRPGEVYTLKHDITDVQCLMPGLILAIRKVVRLKNLVYGLEKFL	0	15.846	0	14.4781	4	10	4	1.783	2.58	6.06061	2	2	NA	0	NA	NA	6.82	8.41751	2	2	11.72	11.7845	3	4	5.03	6.73401	2	2	1	1	1	0	1	4	WTSP	Detected by both ITAG and Atlas
Solyc03g026310	ABC transporter permease/ATP-binding protein (AHRD V1 ***- A6ANR0_VIBHA); contains Interpro domain(s) IPR001140 ABC transporter, transmembrane region	AT4G25450	MATVPNTFWGLPLTPFPIQRRRNHRLVLLRSNGPSQFSISTAQPFRSQFVNCRKLKRSVVSSAYITGPAFDAFVSESDPKFEESDDSLVAVQPIEVIRWGFIWKLVSRHKLKLLASVFSLVICTTCSLSLPLLSGRFFEVLIGTRTDPLLELLSKVALLYTLEPIFTIIYVANITSIWEKVMSSLRAQIFRRVLIQKIDFFDRYKVGELTALLTSDLGSLKNIVSENTSRDRGFRALSEVVGTLSLLFALSPQLAPILGLLILAVSILVALFKRSTVNVFQAHGLVQASIADSVTESFSAIRTVRSFSGEKRQMSVFARQVLEFESSSIKIGTFKSFHESVTRVAIYISLMALYCLGGSKVKAGELSVGIMASFIGYTFTLTFAVQGLVNTFGDLRAAL…	0.005	3.128	6	1.35747	1	3	1	0.096	2.52	1.35747	1	1	NA	0	NA	NA	1.98	1.35747	1	1	NA	0	NA	NA	2.08	1.35747	1	1	1	0	1	0	1	3	WTSP	Detected by both ITAG and Atlas
Solyc03g026320	Lipid A export ATP-binding_permease protein MsbA	AT4G25450	MDFLQGSRKARRLDFLSRDYVLSFLVLLEAYLIMFYPSWKVDMNSRCSLGVMLLLVMVVFHNYSPHNLPPKKKLNSVDQIGCGKTPNLNATSALDTISERLVQEALDHLMKGRTTLVIAHRLSTVQNADQIALCSDGKIAELGTHLELLERKGQYASLVDTQRLHDTVH	0.002	2.971	5	6.50888	1	1	1	0.233	2.11	6.50888	1	1	NA	0	NA	NA	NA	0	NA	NA	NA	0	NA	NA	NA	0	NA	NA	0	0	0	0	1	1	WTSP	ITAG only
Solyc03g026330	Uncharacterized conserved protein (AHRD V1 *-*- Q7VAI6_PROMA)	AT5G62140	MGSQIYSSTPQFSCQFPKIKSRQISSYSSVQLKPRISIISCQQQPQSTGVVTETPVPRTAIYNVDFKTFEDCKLGISRYPDFVYNAQGGTGTGTGKRIESSDEISIDFDLEKLYIPPLTSATAKFLGLPLPPFLKIDVEPELLRGYVNQETG	0	13.643	0	25	3	13	3	1.154	4.5	13.1579	2	2	5.93	17.7632	2	2	6.67	25	3	3	8.57	25	3	3	7.11	25	3	3	1	1	1	1	1	5	WTSP	Detected by both ITAG and Atlas
Solyc03g026350	WD-40 repeat family protein IPR020472 G-protein beta WD-40 repeat, region	AT5G51980	MEMDGSKRVFQRLGPSSQGDTSNNKQQKVCFHWRAGRCNRFPCPFLHRELPGPPQQQQHAAGNGMSSSKRPHGFSDDNRGSGMRRNPNFNNTWGRTAAGGGAVVRKTEKVCNYWVKGNCTYGNTCRYLHSWTTGDCFTLLTTLEGHQKVVTGIALPSGSDKLYSGSTDKSVRVWDCQSGQCAGVVNFDGEVGSMLSEGPWIFVGLTNLVKAWNTQTGTDLSLNGPVGQVYALVVGNDMLLAGTEDGILAWKYNGSTNNFDPIKALTGHSHHVVSLVVGANRLYSGSMDNSIRVWNLETLECLQILTDHTSVVMSVLCWDQFLLSCSLDKTIKVWAANDSGNLEVTYTHQEDCGVLTLCGMHDSEAKPVLLCSRNDNTIRVYDLPSFSERGKIFSKEGVR…	0.001	4.298	1	4.17633	1	2	1	0.136	3.7	4.17633	1	1	NA	0	NA	NA	NA	0	NA	NA	NA	0	NA	NA	4.19	4.17633	1	1	1	0	0	0	1	2	1 Peptide	ITAG only
Solyc03g031700	ABC transporter FeS assembly protein SufB (AHRD V1 ***- C7JBP7_ACEP3); contains Interpro domain(s) IPR010231 SUF system FeS cluster assembly, SufB	AT4G04770	MASLVTNGISCFSPQPITEQPKLSKGSQFLLKLANPRNPNSRILKVKAAELSYEATIDSPGKESSVSTSNENDPLQKFLKRDYKWGFNQEIDSFSLPKGLSAETVKLISGRKNEPNWMLEFRLKSYEKFLKMKEPKWSDNRYPEISFQDICYYSEPKKKPTLNSLDEADPELIKYFDKLGVPLNERNRLANVAVDAVLDSVSIATTHRKTLEKAGVIFCSISEAIREYPDLVKKYLGRVVPPEDNFYAALNSAVFSDGSFVYIPKNTRCPMQISTYFRINAMETGQFERTVIIAEEGSFVEYLEGCTAPSYDTNQLHAAVVELYCHEGAEIKYSTVQNWYAGDEEGRGGIYNFVTKRGICAGARSKISWTQVETGSAITWKYPSVVLEGDESVGEFYSV…	0	21.415	0	13.1387	6	12	4	0.778	8.26	8.39416	4	4	6.87	6.38686	3	3	3.3	2.73723	1	1	11.64	9.48905	4	4	NA	0	NA	NA	0	1	0	1	1	3	WTSP	Detected by both ITAG and Atlas
Solyc03g032070	Holliday junction ATP-dependent DNA helicase ruvB IPR010339 TIP49, C-terminal	AT5G67630	MAMGELKISEMRDLTRIERIGAHSHIRGLGLDSSLEPRLSSEGMVGQIPARKAAGIIVKMVQQGKIAGRALLLAGQPGTGKTAIAMGMAKSLGQETPFAMLAGSELYSLDMSKTEALMQAFRKAIGVRIKEEAEVIEGEVVEVHIDRPAVAGAASKTGKLTLKTTDMETVYDLGAKMIEALGKEKVQSGDVIAIDKASGKITKLGRSFSRSRDYDAMGPQTKFVQCPEGELQKRKEIVHCVTLHEIDVINSRTQGFLALFTGDTGEIRAEVREQIDTKVAEWREEGKAEIVPGVLFIDEVHMLDIECFSFLNRALENDMAPILVVATNRGITTIRGTNYRSPHGIPIDFLDRLLIISTQPYKEEEIRKILDIRCQEEDVEMSEDAKVLLTKIGVNTSLR…	0.004	2.349	9	2.55864	1	2	1	0.093	NA	0	NA	NA	2.84	2.55864	1	1	NA	0	NA	NA	2.22	2.55864	1	1	NA	0	NA	NA	0	1	0	1	0	2	1 Peptide	ITAG only
Solyc03g032160	Ubiquilin-1 (AHRD V1 *--- B6T584_MAIZE); contains Interpro domain(s) IPR015496 Ubiquilin	AT2G17190	MSMGGGDASVPAGDSGDSNKVSNTGAGGGVTINIRCSSGSKFSVQVSLDSTVGSFKSILAQQANIPAEQQRLIYKGRILKDEQTLESYGLEADHTVHLVRGSAPAPSANPACAPNVGGPNTAQNAPRSAASDAGGPFPGSGLGASMFPGLGSGGGGGLFGAGLPDFEQVQQQLTQNPDMMRDMMNMPLVQNLMNNPETIRNLIMNNPQMREIMDRNPELAHVLNDPATLRQTMEAARNPELMREMMRNTDRAMSNIESSPEGFNMLRRMYENVQEPFLNASTLSGDTRNDAGSNPFAALLGAQGGLGRQQANNPPTAGSETTDNLPAPNTNPLPNPWASAGTGAAQANTAARSNTAGDTRGAPLGLGGLGSPGLEQMLGGMPDTTSLNQMMQNPAISQM…	0.008	2.698	10	1.79533	1	3	1	0.155	NA	0	NA	NA	2.07	1.79533	1	1	NA	0	NA	NA	2.31	1.79533	1	1	2.52	1.79533	1	1	1	1	0	1	0	3	1 Peptide	Detected by both ITAG and Atlas
Solyc03g034170	Uncharacterized conserved membrane protein (AHRD V1 *--- A5GSC9_SYNR3)	AT5G38660	MVKTVAAMRGAGGTLFCSQSFAVFNNTQIHAQIRPSLPLTLPPLVHKLTTFSNQDSILAKTQYRLRLKVVTKAADSSQPTSAITSSGNAIVPDEEFSLAKVSFGVIGLGLGVSLLSYGFGAYFNILPGSEWSAIMLTYGFPLAIIGMALKYAELKPVPCLTYADAELLREKCATPVLKQVRSDVIRYRYGDEQHLDEALKRIFQFGLGGGIPRRSAPILQNIREEVTEDGKYCLVLVFEAKALQLSDFEKRQAKFTSFFGPGISSEIVKGENDLYEVRLISNTTL	0	13.938	0	17.193	4	6	4	1.154	NA	0	NA	NA	NA	0	NA	NA	5.59	9.82456	2	2	8.97	12.6316	3	3	2.57	4.5614	1	1	1	1	1	0	0	3	WTSP	Detected by both ITAG and Atlas
Solyc03g034190	Ribosomal protein PSRP-3/Ycf65 (AHRD V1 *-*- B5W261_SPIMA); contains Interpro domain(s) IPR006924 Ribosomal protein, PSRP-3/Ycf65	AT5G15760	MMLSMATQLTVNWVPAFSSQNQFFSPKFVFFTKGQSFSRRSNVSAIVPRRNLGGFATSAAAALSFAEETSTRDSISSDSLQKEKLGVLVKPLEKPRLVLKFIWMEKNIGISLDQVIPGHGTIPLSPYYFWPRKDAWEELKVMLESKPWISQKQAIILLNQATDIINLWQQSGGDLA	0	29.043	0	23.8636	5	23	3	4.623	13.41	23.2955	4	5	7.66	11.3636	3	3	12.43	18.1818	4	7	10.6	11.3636	2	4	7.58	6.81818	1	4	1	1	1	1	1	5	WTSP	Detected by both ITAG and Atlas
Solyc03g034220	Ribulose bisphosphate carboxylase small chain (AHRD V1 ***- A9YTZ7_SOLTU); contains Interpro domain(s) IPR000894 Ribulose bisphosphate carboxylase, small chain	AT5G38410	MASSVISSAAVATRSNVTQASMVAPFTGLKSSATFPVTKKQNLDITSIASNGGRVSCMQVWPPINMKKYETLSYLPDLSDEQLLSEIEYLLKNGWVPCLEFETEHGFVYRENNKSPGYYDGRYWTMWKLPMFGCTDATQVLAEVQEAKKAYPQAWVRIIGFDNVRQVQCISFIAYKPEGY	0	32.161	0	27.7778	8	216	1	11.589	120.35	27.7778	7	96	41.3	27.7778	7	33	58.04	27.7778	7	34	38.27	13.8889	4	21	53.18	27.7778	8	32	1	0	1	1	1	4	WTSP	Detected by both ITAG and Atlas
Solyc03g043750	FAD-dependent pyridine nucleotide-disulphide oxidoreductase (AHRD V1 ***- A0YND6_LYNSP); contains Interpro domain(s) IPR013027 FAD-dependent pyridine nucleotide-disulphide oxidoreductase	AT5G08740	MNQLLPPLHQKNPIASMEFTLASSASAKTALLSCRQMGLGSPKLPNVWRRSSWRSRSSRRNTSLRTVAMSTTAGLVNNMEAPEANAQNVNYMWPDKKRPRICIIGGGFGGLYTALRLESLVWPDDKKPQVVLIDQSERFVFKPLLYELLSGEVEAWEIAPQFSDLLANTGVRFFKDRVKCLYPCDHLGTNAPTAGTVHLESGLLIEYDWLVLAIGAEAKLDIVPGAADYALPFYTLEDAHRVDKKLRELERKNFGKDSAIRVAVVGCGYGGVELAATISERLQQKGIVQAINVDKTILSNAPAGNREAALKVLSSRKVQLILGYFVRCITKGNEPQTDAEPGSIDSAADHSESVTLELQPAERGLQGQTIRADIVLWTIGSKPLLPQLEPSDKPYDIPL…	0	19.795	0	13.0515	6	17	6	1.069	7.48	4.04412	2	3	2.43	3.86029	2	2	10.95	6.25	3	4	7.23	4.04412	2	3	13.76	11.2132	5	5	1	1	1	1	1	5	WTSP	Detected by both ITAG and Atlas
Solyc03g043880	Branched-chain amino acid aminotransferase (AHRD V1 **** Q9SNY9_SOLTU); contains Interpro domain(s) IPR005786 Branched-chain amino acid aminotransferase II	AT5G65780	MESGGVLAGLHRNPTCHHLLRPPRAAVNNLLSSSSFTDKRHFSPLPLKFQKQSHFASYSCNCSINDGSAFQVASSASATAELANIDWDNIGFAVMPTDYMYSMKCSQDGNFSKGELQRFGNIELSPASGILNYGQGLFEGLKAYKRHDGNILLFRPEENALRMKMGAERICMPSPSVEQFVEAVKATVLANERWIPPPGKGSLYIRPLLMGSGAILGVAPAPEYTFLIYVSPVGNYFKEGMAPINLLIETEMHRATPGGTGGVKTIGNYAAVLKAQSAAKAKGYSDVLYLDSVNNRYLEEVSSCNVFIVKGNLIATPAIKGTILPGITRKSIIDVALSQGFQVEERQVSVDELLDADEVFCTGTAVVVSPVGSITHLGKRVSYGSDGVGRVSKQLYSTL…	0	14.171	0	12.4402	5	14	1	0.833	11.6	10.0478	4	5	4.9	5.50239	2	3	2.3	2.15311	1	1	1.82	3.82775	2	2	4.64	7.89474	3	3	1	0	0	1	1	3	WTSP	Detected by both ITAG and Atlas
Solyc03g044190	FAD-dependent oxidoreductase IPR006076 FAD dependent oxidoreductase	AT5G67290	MDTNPQPKKVAVCGGGVIGVCTAYFLSKNGASVTLIEQSSVACAASGKAGGFLALDWCDGGPVASLARASFNLHRSLAQELNGSESYGYRPLTTLSVSITESSSSSSNRTGPIPSWVDGPAKSPRTIGSTDSTAQVHPEMFTKRLLSKAMEDYGVELVIGKVERVEMAEGKTRGVVLEDGREIDAAAIVLAVGPWSKRFSILGSLFRVYGIKAHSIVLEPKEANRITPHALFLTYYPAQGGKPMDPEVYPRPTGEVYICGMSAQAEVPDDPEQITPVPESINTLKRVASSVSSHLVEGEATVKAEQACILPCSEDDVPIIGEVPGVEGCYVATGHSCWGILNGPATGAAMAELILDGRASIVDLSRFSPARFASAVKK	0.004	2.602	9	2.38095	1	1	1	0.155	NA	0	NA	NA	NA	0	NA	NA	2.44	2.38095	1	1	NA	0	NA	NA	NA	0	NA	NA	0	0	1	0	0	1	WTSP	ITAG only
Solyc03g044330	Acetolactate synthase (AHRD V1 **** D7RPJ7_SOLTU); contains Interpro domain(s) IPR012846 Acetolactate synthase, large subunit, biosynthetic	AT3G48560	MAAAASPSPCFSKTLPPSSSKSSTILPRSTFSFHNHPQKASPLHLIHAQHNRRGFAVANVVISTTTHNDVSEPETFVSRFAPDEPRKGCDVLVEALEREGVTDVFAYPGGASMEIHQALTRSNIIRNVLPRHEQGGVFAAEGYARATGFPGVCIATSGPGATNLVSGLADALLDSIPIVAITGQVPRRMIGTDAFQETPIVEVTRSITKHNYLVMDVEDIPRVVREAFFLAKSGRPGPVLIDVPKDIQQQLVIPNWDQPMRLPGYMSRLPKLPNEMLLEQIVRLISESKKPVLYVGGGCSQSSEELRRFVELTGIPVASTLMGLGAFPTGDELSLQMLGMHGTVYANYAVDSSDLLLAFGVRFDDRVTGKLEAFASRAKIVHIDIDSAEIGKNKQPHVS…	0	57.549	0	17.9059	9	28	1	2.3	26.65	11.9879	6	8	18.35	9.40819	5	6	23.08	11.8361	6	8	4.77	2.88316	2	2	11.01	6.82853	4	4	1	1	1	1	1	5	WTSP	Detected by both ITAG and Atlas
Solyc03g044470	Red chlorophyll catabolite reductase (Fragment) (AHRD V1 **** Q1ELT8_SOLLC); contains Interpro domain(s) IPR009439 Red chlorophyll catabolite reductase	AT4G37000	MAVPLSSAKFHTSILTQSLPSSSSRSFSVGKRFCCSSSSTSMEHHESKFKEFPYASVPHRELMVELVSTVENRLGESLLPCTLPSHVQYFENESATAHASLYVRSGNSSSQVDFILGSWVHCNLPTGGALNITSLSVYLRPSTDAPNFLIEVIQSSPTTLILILDLPPRKDLVQHPDYLKTFYEETQLDKQRQLLEKLPEVKPYFSSSLYIRALVSPSAILVSIETDPSQAIRIDEIIQDHISPVAKVMLDTWLNLCACTERRLTDDESKDLAKRDQIIKNKTIEIDLESSFPRLFGQQVANQVLGVLREIYNS	0	53.907	0	28.9809	7	38	7	5.105	44.18	28.9809	7	13	23.05	24.5223	6	8	20.54	12.7389	3	7	12.32	16.5605	4	5	13.14	16.5605	4	5	1	1	1	1	1	5	WTSP	Detected by both ITAG and Atlas
Solyc03g044630	Conserved domain protein (AHRD V1 *-*- B4WN95_9SYNE); contains Interpro domain(s) IPR005500 Protein of unknown function DUF309	AT2G41120	MANNISINLPKFNQTLISFTNISSLSNFPYSKIHLHSQLYHRQFKVTNYTSPSSYTYRLFSRRSFMEDEDDHKSKNYSFQEAVRLFNSRDYYRCHDVVEALWTESQEPIRSLLHGILQCAVGFHHLFNKNHKGAMMELGEGVCKLRKFNFENGPFYEFEKEISQVLDFIYATQIEVAACGDDICVTMDQSERSYQLLGGFAAGQQLYTLVTEQHDYCYIVFSYPKYDENVQQLRIKLPTINASEQNLKELEYS	0.003	3.381	4	3.55731	1	3	1	0.292	2.56	3.55731	1	1	2.66	3.55731	1	1	NA	0	NA	NA	2.26	3.55731	1	1	NA	0	NA	NA	0	1	0	1	1	3	WTSP	Detected by both ITAG and Atlas
Solyc03g044660	Dihydrodipicolinate synthase 2 (AHRD V1 **** D7LCJ3_ARALY); contains Interpro domain(s) IPR005263 Dihydrodipicolinate synthase subfamily	AT3G60880	MSSSITSCCHFYVERAGTTNRRNATWKSPRAAVIPSIHLPMRSNEVKNRTFAEDIKKLRLITAIKTPYLPDGRFDLEAYDALVNLQIENGVEGVIVGGTTGEGQLMSWDEHIMLIGHTINCFGGSIKVIGNTGSNSTREAIHATEQGFAVGMHAALHINPYYGKTSIEGLISHFDSVLPMGPTIIYNVPSRTGQDIPPHVIQALAKSPNLAGVKECVGNDRVEQYTRNGLVVWSGNDDECHDSRWHHGATGVISVTSNLVPGLMRELMFGGNNPVLNSKLMPLVEWLFHEPNPIALNTALAQLGVVRPVFRLPYVPLTKAKREEFVKIVEKIGRENFIGERDVQVLDDNDFFLVGRY	0	17.711	0	13.1653	4	12	4	1.054	13.75	10.9244	3	5	5.33	6.44258	2	2	5.85	6.72269	2	2	5.81	6.72269	2	2	2.29	2.2409	1	1	1	1	1	1	1	5	WTSP	Detected by both ITAG and Atlas
Solyc03g045050	Nuclear matrix constituent protein 1	AT1G68790	MSTPPRKVFSGWTLTPRTDLANKTVSKGKDVVFMGSGQKVLSSIQDYDTVDKVVLLDKVSKLENELVDYQYNMGLLLIEKKEWSAKLEEIKQALSEANEAYRREHTAHLIALSEVEKREENLRKALGVENQCVRELEKELREMRSQYAETKYVADSKLDEAKALATSVEENSLHVELKLRAADAKTAEVSRKSSDVERKMRDIEAQENALRRERSSFNTEREAHESAISKHREELREWERKLKEGEERLADARTLLNQREQRANENDGILRQKQSDLEDEQRKIDIANSVLRKKEVDMSSRLAILASKEKELEDVRKSLEIKKEELDELQEKLNAKEREEIQKLMDEHRAILKSKEEEFELEMRQRHASLDEELENKVIELEKKEAEVGHIEEKLKKRE…	0	24.57	0	6.08398	6	13	6	0.215	NA	0	NA	NA	15.5	3.68466	3	5	3.72	1.19966	1	1	11.02	4.62725	4	4	8.67	3.42759	3	3	1	1	1	1	0	4	CIP	ITAG only
Solyc03g045090	cDNA clone 001-043-A08 full insert sequence	AT3G02420	MGGGEEDQQKLKNTAAAAYDYENDPRWADYWSNILIPPHMASRSDVVDHFKRKFYQRYIDPGLVVEPMATSSSSQPAKPSVAQPSSSSSTPSNNQPRQRNSGQASRTSGTPTTPTSNPTSLRWDRNTIQFSVNAWVFVVAVLSIFPLTPANLSNRAYRLSFLGTACSSLYSLYSVYGKPRAWNLQAVQVWFQSVIVTKDFISFIYCLTFVTSHLYLKFSLIPVLCRSLEHVGKFLRRNFGRSSLYRKYLEEACVWVESNVTTLNILSSQAEIGLGFLLVVSLLSWQRNIIQTFMYWQILKLMYHAPATAGYHQNVWAKIGGLVNPVVQRAPFLNTPISTIQRWWFR	0.027	1.639	65	4.04624	1	3	1	0.259	NA	0	NA	NA	NA	0	NA	NA	1.89	4.04624	1	1	2.58	4.04624	1	1	2.21	4.04624	1	1	1	1	1	0	0	3	1 Peptide	ITAG only
Solyc03g058190	Elongation factor family GTP-binding protein (AHRD V1 **** Q67QM4_SYMTH); contains Interpro domain(s) IPR006298 GTP-binding protein TypA	AT5G13650	MEMSMASTTPCFSLPKKTFCISTPLLKKQLFGTTLPGCLSAKLPLKLNPIHTSIKCAVSEATQAPSALEKKSQLMRRSDIRNIAIVAHVDHGKTTLVDSMLKQAKVFRDNQFVQERIMDSNDIERERGITILSKNTSITYKDTKINIIDTPGHSDFGGEVERILNMVEGVLLVVDSVEGPMPQTRFVLKKALEFGHAVVVVVNKIDRPSARPEFVVNSTFELFIELNATDEQCDFQVIYASGIKGKAGLSPENLGEDLGSLFEAVIRCIPGPKINKDGALQMLATNIEYEEHKGRIAIGRVHAGSLRRGMDVKICTSEDACRFGRVSELFVYEKFSRVPAETVEAGDICAVCGIDDIQIGETIADKSDGKPLPSIKVEEPTVKMSFSVNTSPFVGREGK…	0	35.843	0	14.5833	7	15	7	0.812	17.26	10.119	5	5	10.25	6.39881	3	3	11.86	6.10119	3	4	4.51	4.01786	2	2	2.21	1.33929	1	1	1	1	1	1	1	5	WTSP	Detected by both ITAG and Atlas
Solyc03g058860	3-dehydroquinate synthase (AHRD V1 ***- B4FYZ3_MAIZE); contains Interpro domain(s) IPR002812 3-dehydroquinate synthase, prokaryotic-type	AT3G28760	MDILLPSLSHSFPKFAGKRQNCRKFLGINRVARMCAFTPSNSKKKTVWIWTENKQVMTAAVEGGWNTFIFPSNRQDLALEWSSIAVIHPVFIKEGRLIDHEHKSVAAFAEISSPQQLEQFQISEEQSDKVVVNLLDWQVIPAENIVAAFQGTQTTVLAVSKNQSEAQAFLEALEHGLGGVVMKVEDVGAILELKGYFDRRREVDSLLNLTKAIITHIQVTGMGDRVCVDICSLMRPGEGLLVGSFARGLFLVHSECLESNYISSRPFRVNAGPVHAYVAVPGGKTSYLSELKSGKEVIVVDQRGMQRTAIVGRVKVETRPLILVEAKVESENESYSILLQNAETVGLVSPLHGEGHQRTTIPVTSLEVGSEVLLLLQGGARHTGIEIKEFIVEK	0	33.802	0	18.5279	7	27	7	2.415	23.41	14.9746	6	8	16.92	11.4213	4	6	11.03	8.12183	3	4	11.83	6.09137	2	4	11.11	13.198	5	5	1	1	1	1	1	5	WTSP	Detected by both ITAG and Atlas
Solyc03g059180	Extracellular calcium sensing receptor (AHRD V1 *-*- C7BCU7_LIQFO); contains Interpro domain(s) IPR001763 Rhodanese-like	AT3G59780	MATLPVCSATACSSSHSQIPFYGGLRSFSSCWKTYQLKCNVVDLSTSFHLNGPSFRGQSPIFLYSQFVQNSSLSSSSDSICTSCQNVIYSVNRELLTSDARSNSTGNLKFVDSSAVPVGREEMMGFNDDLVNIANFSPESANLESITTVDLTQGNPASILDSMDLETSSLSNVKSSALDVLSQVNKSITGSVENGQSYLNSSLDGISSSVTSAVRGATQAVDDVISKLTSTVDKTGDSAGNGVAAFSTGLKEVSGRVGLLAIDGLRHIILIFEDLVSRGATLVVFSYGSVKEVLPMEVQDLLNVSEERAVKLLTPFGTALGQGYVALEGLERSLGLDPSDPIIPFILFLGVSTAFWAFYWKLTYGGYAGDLSPKSSFELLKGDRKAVLIDIRPEDLREK…	0.001	4.524	1	2.24719	1	1	1	0.116	NA	0	NA	NA	2.76	2.24719	1	1	NA	0	NA	NA	NA	0	NA	NA	NA	0	NA	NA	0	0	0	1	0	1	WTSP	Detected by both ITAG and Atlas
Solyc03g059260	Carboxyl-terminal-processing protease (AHRD V1 ***- B6T6L2_MAIZE); contains Interpro domain(s) IPR004447 Peptidase S41A, C-terminal protease	AT3G57680	METLCSNINVGSSISKPSFCYRFPSLTHRRGAACRRKELIPISLVGENDQNLVKCIGKGVIGLAAATVLSFSSYSPAFAQSLTVAFPVSHTPEVNTVQRTLIEAWSLIRETFVDPTFNHQDWDLKLQQTMVEMFPLRSEDAAYSKVRGMLSTLGDPYTRIISPKEYQSFRIGSDGNLQGVGLFVSVEPNTGHLVVLSCVENSPAARAGIHEGDELLEINGERLDGVDSETAAQKLRGRAGTTVTVKVHRDIGAGVSSYQEVKLPREVIKLSPVSSTIIPHKMPDGRLLKTGYVKLSSFSQSAAMEMENTIQDMENQGVESYILDLRNNPGGLVTAGLDVAQIWLDGDETLVNTVDRDGNMAPISMVNGHAVTHDPLVVLVNEGSASASEILAGALHDNG…	0	6.65	0	5.23139	2	4	2	0.389	NA	0	NA	NA	2.16	2.01207	1	1	2.59	3.21932	1	1	3.59	3.21932	1	1	2.54	3.21932	1	1	1	1	1	1	0	4	WTSP	Detected by both ITAG and Atlas
Solyc03g062710	Aldose 1-epimerase family protein expressed (AHRD V1 **-- Q10CW2_ORYSJ); contains Interpro domain(s) IPR011013 Glycoside hydrolase-type carbohydrate-binding	AT1G55370	MATINTSLLSPNIILGSLISRSPSKSISAFPTPPLCSPLHYSCLTRNTQLPGVASISYPPVDMEYLESEFSGHGVTFTEVNESCVVRMALENGSIANLMLPSGLITSYKAQMWHGGTMELLHTTVSEGQNGSPVIEGGVSLACNCENDQGFSWSPSSWALHQVKGDPQGSIQVELICTSSDGKIEAKYMVTLQEDLLTSEIKIFNLGMASFRMTGSVLSHLTVSTPEASYAVGLQGSDFFSNPPFLANFSIVPPAFGKTKNQPSKKSFGEIFSSWGTKNQNPEKIAEKELEGEETDNYKHLTDEMSKIYRSAPRNFTLIDRGRRNSVVVGRDGFKEVYLLSPGSRHESYGRYSYICVGQAALLQPIIIESQSEWRGKQSLHNPNM	0.002	4.25	3	3.8961	2	3	2	0.468	NA	0	NA	NA	NA	0	NA	NA	2.77	3.8961	1	1	2.4	2.85714	1	1	2.37	2.85714	1	1	1	1	1	0	0	3	WTSP	Detected by both ITAG and Atlas
Solyc03g062720	Galactose mutarotase-like (AHRD V1 **-- A2Q5N9_MEDTR); contains Interpro domain(s) IPR011013 Glycoside hydrolase-type carbohydrate-binding	AT1G64770	MAAAAVLSLSLPKLNNAIKASSGSSSSTTTFAPESLEEKFGRKGIKFSDGGTVELTVRNGSSVKLQIPNAHITSYKPKVYWKDDGFEEVLYTLPNSRGGIALVINEILEPNPKLPVPKTTTPSDQWTLTDVDSDSIDALQVELSCSRGSLDINYVVSLYPLSIATAVILKNNGRKPVKLTTAILSHLMSKTRKGTGIQGLRSCTYCTHPPLSSSFEILSPGEAMKTEEPGMFSFGWEPENKPGIWSTQDVPITVLKHKLSRLYSVPPQEKAKDFYNSIPSKYETIDQGRELFFRIIRLGFEDIYVSSPGSFSEKYGKDYFICTGPASMLVPLVINPGEEWRGAQVIEHDNL	0	50.6	0	16.8091	4	37	4	4.179	31.68	16.8091	4	10	27.95	11.9658	3	10	18.44	12.2507	3	7	15.02	12.2507	3	5	15.9	12.2507	3	5	1	1	1	1	1	5	WTSP	Detected by both ITAG and Atlas
Solyc03g062790	cDNA clone 002-130-C06 full insert sequence (AHRD V1 **-- B7F0E5_ORYSJ)	AT2G42130	MATSLQNLVPPFSCRRTTYTSPCTPIAIFRGGRRRNARKMLRVCRAMVEKTVQGASSTFAKEMERLSAKESLLLAFKDAGGFEALVTGKTTDVQCIDVNERIISLEKLNPTPRPSTSPNLEGRWNFEWFGAGSPVLLLAKIFFGRIPPTLANLSKLDVLIKDGCGTATAQVKILNSIENKFIISTKYSVEGPLRMKEEYVEGEFESPKVDEEAVPEQLRGAFGQAFNTLQQLPVPIRDAVSSGMKVSLSGTFQRLILISYLDDEILIIRNTAGEPEVLTRLEAGPDPQNITEYES	0	90.103	0	54.2373	15	101	15	6.406	58.23	45.7627	11	21	69.66	47.4576	12	26	44.14	31.5254	8	14	62.39	33.2203	9	19	64.42	39.661	10	21	1	1	1	1	1	5	WTSP	Detected by both ITAG and Atlas
Solyc03g062830	Nudix hydrolase 23 (AHRD V1 *-*- B6TED1_MAIZE); contains Interpro domain(s) IPR000086 NUDIX hydrolase domain	AT2G42070	MLKAIQIVGSSSGFASYRFRKPQPNSAFSLISRKPILTTSETLLLPASQLHSHKSCFRDFRMSSTHSKSSSSSSVAVQSTGNIRKINFCQFCGGPNKHEIPDGEEKVRAICTHCGKITYENPKMVVGCLIEHDKKILMCRRKIHPSYGLWTLPAGYMEIGESAAEGAIRETWEEANAEVEVQSLFAQLDIPLIGQTYMIFLAKLKNPHFSPGPESSECQLFELDDIPFDSLAFSSMLVSLNLYIEDIKVGRPKFHYGVINKRPGTSPSDIHAYTLDFHMQS	0	5.727	0	5.69395	1	7	1	0.259	5.3	5.69395	1	2	4.65	5.69395	1	2	6.77	5.69395	1	3	NA	0	NA	NA	NA	0	NA	NA	0	0	1	1	1	3	WTSP	Detected by both ITAG and Atlas
Solyc03g063110	Stearoyl-acyl carrier protein desaturase (AHRD V1 **** B7TZ44_SPIOL); contains Interpro domain(s) IPR005067 Fatty acid desaturase, type 2	AT3G02630	MALNFNPPTFQSIQTTRRPCSPLRSHRVLMASTLRPPSVEGGNVKKPFSPPREVHVQVTHSMPPEKREIFDSLQGWAENNILVHLKPVEKCWQASDFLPDPASEGFEDQVKELRERCKEIPDDYFVVLVGDMITEEALPTYQTMINTLDSVRDETGASLTPWAIWTRAWTAEENRHGDLLNKYLYLSGRVDMRQIEKTIQYLIGSGMDPRTENNPYLGFIYTSFQERATFISHGNTARHAKEHGDMKLAQVCGIIAADEKRHETAYTKIVEKLFEVDPDGTVMAVADMMRKKISMPAHLMYDGRDDNLFEHFSAVAQRLGVYTAKDYADILEFLVGRWEIEKLTGLSGEGHKAQDYVCGLAPRIRKLEERAQARAKQKAPVPFSWVFGKDIKL	0	27.744	0	13.7405	4	34	1	0.874	27.54	13.7405	4	10	24.97	13.7405	4	9	21.6	10.687	3	7	14.61	10.687	3	5	9.82	6.36132	2	3	1	1	1	1	1	5	WTSP	Detected by both ITAG and Atlas
Solyc03g063210	SWR1 complex protein SNF2 family DNA-dependent ATPase (Fragment) (AHRD V1 *--- A9S832_PHYPA)	AT3G12810	MLFRHTSSVPKTKSKKKAKKTKFKSLKKGGLASERQSLKEESSIELMPIDDDNLSSEPVTTPDSAQEKKRKLPRYDEDVKGAKKSKKMKKSSEVSSLVIHSTYLGKRQVESKELKQYDVGTMNIELKPISRSKMGGKVLVSPIPVKRVFSIKSERPIRKGKTWSKDYFPSADSWLQQEDAVLCASVHEYGPHWSLVSDILYGMTAGGAYRGRYRHPLHCCERFRELVQRYVLSAADNVNDRSNNTGSVKGLLKVTEENVRLVLDIASEIPDHEPLVQIHFFALLSSVWKVQKNLKKTFSSSQNGFFHSGSLFSPIMNRVSTNHSMGPPIRRFSNSSLCTKLVAIALSDQQSAQSDERVRICDQREEVSFPSEHLDITLEFGAEKDDKTIPLLHPVTVKI…	0.035	1.807	49	2.28471	1	1	1	0.11	NA	0	NA	NA	NA	0	NA	NA	2.4	2.28471	1	1	NA	0	NA	NA	NA	0	NA	NA	0	0	1	0	0	1	1 PSM	Detected by both ITAG and Atlas
Solyc03g063240	Pyridoxamine 5&apos-phosphate oxidase-related FMN-binding protein (AHRD V1 ***- D6UPC6_9BACT); contains Interpro domain(s) IPR012349 FMN-binding split barrel	AT3G03890	MKTLVLAPSPLRTFSPFSSFLYSNLNNNATHNYLLSPSPSKSFSSLTSTSPLLAMASQNVSSGDEVDIFQLIQAHQEKAARLSPIEDVRTLLHYSLRGVLSTFSQKYEGYPSASMVDFACDTYGSPILAVSNLAVHTKDLLATSRCSLLVARDPEDRTDLVITVHGDAVPVPEIEKEGIRATYLARHPTAFWVDFGDFHFMRIEPRIVRYVVGVATAILGSGEFSKEEFRTAKVDPIYQFSRPITSHMNKDHMEDTKLIVQHATSVPVDFAYMLDIDSLGFNVKACYKDTDLKLRVPFPRRAVDRKDVKALIVEMLQAART	0	15.527	0	16.5109	5	15	5	2.981	4.02	5.29595	2	2	4.91	8.41121	3	3	9.76	11.215	3	4	9.09	8.72274	3	4	2.46	5.919	2	2	1	1	1	1	1	5	WTSP	Detected by both ITAG and Atlas
Solyc03g063560	Glutamate synthase (Ferredoxin) (AHRD V1 ***- B8HTZ7_CYAP4); contains Interpro domain(s) IPR002932 Glutamate synthase, central-C	AT5G04140	MAVNSVANVPQLLYGQSPKILTGNKDGLFADFLGFYCKSSKRIRRRIGYAATNRRSLINKKCNAVLDLQRGASNASRQSSDIVPKVADLDDILSERGACGVGFIANLDNKASHGIVKDALVALGCMEHRGGCGADNDSGDGSGLMTSIPWDLFNDWAEKEGIAVFDKLHTGVGMVFLPNDSNQMNEAKKVISNIFNNEGLEVLGWRSVPVDSSVVGYYAKVTMPNIQQVFVRVVKEENVDDIERELYICRKLIERAVNSEIWGNELYFCSLSNQTIVYKGMLRSEVLGRFYYDLQNELYTSPLAIYHRRFSTNTSPRWPLAQPMRFLGHNGEINTIQGNLNWMQSREASLKSAVWRDREDEIRPFGNPKASDSANLDSTAELLIRSGRAPEEALMILVP…	0	391.256	0	31.8939	53	691	53	20.8	495.13	28.5009	45	160	443.33	28.686	42	142	425.78	26.4035	43	145	377.49	27.6373	43	129	325.32	25.0463	38	115	1	1	1	1	1	5	WTSP	Detected by both ITAG and Atlas
Solyc03g065340	Phosphorylase (AHRD V1 **** B9SJB6_RICCO); contains Interpro domain(s) IPR011833 Glycogen/starch/alpha-glucan phosphorylase	AT3G29320	MATANGAHLFNHCGSNSRFIHFTSRNTTSKLFLTKTSHFRTPKRSFHVNNILTDKIHHPITEQGGESDLSCFSPDAASITSSIKYHAEFTPVFSPERFELPNAFFATAQSVRDSLLINWNATYDVYEKLNMKQAYYLSMEFLQGRALLNAIGNLELTGAFAEALKNLGHNLENVASQEPDAALGNGGLGRLASCFLDSLATLNYPAWGYGLRYKYGLFQQRITKDGQEEVAEDWLEIGSPWEVVRNDVSYPIKFYGKVSTGSDGKRYWIGGEDIKAVAYDVPIPGYKTRTTISLRLWSTQVPSADFNLSAFNAGEHTKACEAQANAEKICYILYPGDESEEGKILRLKQQYTLCSASLQDIISRFERRSGDRIKWEEFPEKVAVQMNDTHPTLCIPELM…	0	100.462	0	25.8799	24	85	20	3.19	87.03	23.3954	21	31	50.51	17.0807	14	18	42.04	13.0435	11	15	34.87	12.3188	10	12	24.17	8.69565	7	9	1	1	1	1	1	5	WTSP	Detected by both ITAG and Atlas
Solyc03g071590	Malate dehydrogenase (AHRD V1 **** Q5NE17_SOLLC); contains Interpro domain(s) IPR011273 Malate dehydrogenase, NADP-dependent, plants	AT5G58330	MAVAEFIPSSSLTKTTSLYPSQFLHVSTHKPRLSLTPLRRSKICCSVISNAPVPVAKEPTKKTECFGVFCLTYDLKAEEETSSWKKLINVSVSGAAGMIANHFLFKLASGEVFGPDQPVALKLLGSERSIQALEGVAMELEDSLFPLLREVSIGIDPYEVFQDAEWALLIGAKPRGPGMERAGLLDINGQIFAEQGKALNAVASRNVKVIVVGNPCNTNALICLKNAPDIPAKNFHALTRLDENRAKCQLALKAGVFYDKVSNMTIWGNHSTTQVPDFLNAKINGFPVKDVIRDSKWLEEEFTEKIQKRGGVLIQKWGRSSAASTAVSVVDAMRSLVTPTPEGDWFSTGVYTNGNPYGIAKDIVFSMPCRSKGDGDYELVKDVLMDDYLRSRIKKSEDE…	0	78.555	0	25.0535	15	67	3	4.623	40.74	23.1263	11	14	42.29	18.4154	11	14	44.45	20.1285	11	15	39.16	15.2034	9	13	34.87	13.2762	8	11	1	1	1	1	1	5	WTSP	Detected by both ITAG and Atlas
Solyc03g078080	Uridylate kinase (AHRD V1 **** B6TC37_MAIZE); contains Interpro domain(s) IPR015963 Uridylate kinase, bacteria	AT3G18680	MAISTSFCRPISSFNALSSPSLCYFKPLYNHLKLDPSLPLVKCCSSHIGQSPEHINGRQPDLSPIASFGVTMTNNGTSKPSYRWRRVLLKVSGEALAGDQAQNIDPKITMAIAREVAAVTRLGIEVAIVVGGGNIFRGSSWAGSSGLDRSSADYIGMLATVMNAIFLQATMESIGIPTRVQTAFRMSEVAEPYIRRRAVRHLEKGRVVIFAAGTGNPFFTTDTAAALRCAEINAEVVLKATNVDGVYDDNPKHNPNARLQDNLTYHDVISKELSVMDLTAITLCQENNIPVVVFNLNKTGNIAKAIKGERVGTLIGDTWNTEAVVS	0.003	3.529	4	3.06748	1	3	1	0.166	NA	0	NA	NA	NA	0	NA	NA	2.36	3.06748	1	1	2.32	3.06748	1	1	1.82	3.06748	1	1	1	1	1	0	0	3	WTSP	Detected by both ITAG and Atlas
Solyc03g078300	Cc-nbs-lrr, resistance protein	AT3G14460	MDIGLTVGGAFLSSTLQVLFDRLTPQCDFLNLFRGRRQDQRLLKKLHTNLLALRAVVHHIEIQQICDEDIRTWLNQLQDAVDTADNLLDEISYEVLRVSGEETSRFCYLDSMMPKLEETIETLQDLETQINCLTITLKAQLVTGKKDSPKRLPSTSLVDESGVFGRHQEVEEIISKLLSSDDDAHGSGDVVPIVGLGGVGKTTLARAVYNDKRIKQHFNITAWVCVSEEYDAFRITTTLLGEIIGSLDSKVSASNLNQLQIKLSHRLKGKRFLFVLDDVWNENYTDWDELRCPFVHGRKGSRIILTTRKQSVAMMMASEMIQLKSLSDEDCWSLFKTHSFENRDPNKYPELEVVGRQIVGKCKGLPLAVKTLAGLLRSKSTIEEWERLLQSEIWELPSD…	0.035	1.536	86	0.521999	1	1	1	0.036	1.81	0.521999	1	1	NA	0	NA	NA	NA	0	NA	NA	NA	0	NA	NA	NA	0	NA	NA	0	0	0	0	1	1	1 PSM	ITAG only
Solyc03g079930	Mitochondrial glycoprotein family protein (AHRD V1 ***- D7LDS6_ARALY); contains Interpro domain(s) IPR003428 Mitochondrial glycoprotein	AT5G05990	MAVTNIIRRTASQVVPLAARVIFRTQSYHHRSSALLSTIVNRSAASRNFFRSSAPSTLHFYSTKRPSSDESLLKVIQSEIQCAEESDEQDEVEEAPEGFPFKIEDHPGQQTITLTREYQGESINVEVHMPDLVTGDEDENDNGGEDDDEGSNQSNIPLVVRVSKRNGPALEFGITAFADEIAIDTLSIKDPNVAEDQIAYEGPDFTDLDENLQKAFHKYLEIRGIKPSTTNFLHEYMVNKDSREYKMWLKNLKKFIEA	0	23.495	0	15.8915	3	8	3	3.217	2.55	6.58915	1	1	16.98	12.0155	2	5	2.73	3.87597	1	1	3.02	3.87597	1	1	NA	0	NA	NA	0	1	1	1	1	4	CIP	Detected by both ITAG and Atlas
Solyc03g080160	Nascent polypeptide-associated complex alpha subunit-like protein IPR016641 Nascent polypeptide-associated complex, alpha subunit	AT4G10480	MPGPVIEELEAEKKIQEDEPIVEDVKEEDDHDDDADDSDDDEDDDKEDGAQGGNSKQSRSEKKSRKAMLKLGMKPVTGVSRVTIKRTKNVLFFISKPDVFKSPNSETYVIFGEAKIEDLSSQLQTQAAQQFRMPDMGSVMAKPDVSGSNAAAEADEEEEVDETGVEPRDIDLVLTQAGVSRTKAVKALKAHNGDIVSAIMELTT	0	17.083	0	21.5686	3	4	3	1.154	7.65	15.1961	2	2	7.2	14.7059	2	2	NA	0	NA	NA	NA	0	NA	NA	NA	0	NA	NA	0	0	0	1	1	2	Sporadic	ITAG only
Solyc03g081300	At4g38160-like protein (Fragment) (AHRD V1 *--- C0JEI4_9BRAS); contains Interpro domain(s) IPR003690 Mitochodrial transcription termination factor-related	AT5G54180	MSTPTKSFRLSPSPSCLFPPIRTLFPSALLPCQKLAFYPQKQDKLPLHFLVPQDSTLLLLKCNALAINDSSTNSFVDSGVMLFSLFREIGFNETDTEALLDAHPVISLTPFESIRTRIHSLQSLGVSGLALSRLIVKRPDVLTAVEIDGLVSFLIEGDLELAGKIKSSQIEHLFNSTEPRFLEGFETKVRLLLEFGITQDTIVHVLNNANLTKAFCLKSFEDIERMLTFLNRFGGGDLILRRPALLNYDLDAQLIPRVGFLLELSGGDETGTATVLRKLPFVVAYSVDHLKDHVEFLKSYAGLSEEEIFRIVLVYPNMFSASRKRKLHPRIDFLKQCGLSSHDIFRFLIKIGYKKNTKELAMAMGAVTRTSCKNMQEVIGVFLNYGLTFDDILEMSMKH…	0	32.118	0	16.2602	7	13	7	1.371	21	11.7886	5	7	14.48	8.33333	3	4	4.64	5.69106	2	2	NA	0	NA	NA	NA	0	NA	NA	0	0	1	1	1	3	WTSP	Detected by both ITAG and Atlas
Solyc03g082580	Glucosamine-6-phosphate deaminase (AHRD V1 ***- NAGB_ACHLI); contains Interpro domain(s) IPR005900 6-phosphogluconolactonase	AT5G24400	MAVSLASSSPILSSISPTRFSPIRRSILLTSFSVAGKPLFCSHPHRTSSNSWRSQCRTKASMAESVTGKSKAEVKLYDSEEELATALAKYTADLSEKFCKERDAFTVVVSGGSLIKSLRKLVEPPYINSIDWSKWHIFWVDERVVPKDHPDSNYLLAYNGFLSKIPIPAGHVYAINDALSAEAAADDYETCLRHLVKSKIVDISKESGFPKFDVMLLGMGPDGHIASLFPGHPLVHEKEKWVTFIKDSPKPPPNRITFTFPVINSSANIALAIVGAGKADVVQKSLGDDKSSDLLPVQMVSPEGELVWYLDMDAASKL	0	15.228	0	14.1509	4	16	4	0.848	8.94	7.2327	2	3	8.63	7.2327	2	3	7.08	9.74843	3	3	6.46	9.74843	3	3	6.89	14.1509	4	4	1	1	1	1	1	5	WTSP	Detected by both ITAG and Atlas
Solyc03g082600	Cytochrome b5 IPR001199 Cytochrome b5	AT5G53560	MYHSLPARFPAKLKAIRYLNFYINIDPVLPPPHAKRVLGAQSETETESKELSLQEKMASDRKIHAFEEVAKHNKTKDCWLIISGKVYDVTPFMDDHPGGDEVLLSATGKDATNDFEDVGHSDSAREMMDKYYIGEIDMSTVPLKRAYIPSEQTAYNPDKTPEFIIKILQFLVPILILGLAFTVRHYTKEQ	0	11.754	0	8.42105	1	3	1	0.668	NA	0	NA	NA	3.47	8.42105	1	1	2.57	8.42105	1	1	3.23	8.42105	1	1	NA	0	NA	NA	0	1	1	1	0	3	1 Peptide	ITAG only
Solyc03g082890	Pentapeptide repeat protein (AHRD V1 *-*- B4WQI2_9SYNE); contains Interpro domain(s) IPR001646 Pentapeptide repeat	AT5G53490	MASISIPLAYKSHYLLRSPVYRPLQLHSPIQIKCSASKDCSNSEESSTQFKQLRNVACGFLAVWALSSVSPVIAAGQRLPPLSTDPDRCERAFVGNTIGQANGVYDKPLDLRFCDYTNEKTNLKGKSLAAALMSDAKFDGADMTEVIMSKAYAVGASFKGTDFSNAVLDRVNFEKANLQGASFKNTVLSGSTFNNAQLDGADFEDTIIGYIDLQKICTNKTIDEEGRVNLGCR	0	38.211	0	29.1845	7	39	7	3.924	28	20.1717	5	9	32.06	21.03	5	11	18.23	20.1717	4	6	21.8	20.6009	5	8	11.78	21.4592	5	5	1	1	1	1	1	5	WTSP	Detected by both ITAG and Atlas
Solyc03g082920	Heat shock protein IPR013126 Heat shock protein 70	AT5G28540	MKSCHLYFALIGLFGLSTGSLFAFSIAKEEATKLGTVIGIDLGTTYSCVGVYKNGHVEIIANDQGNRITPSWVAFTDGERLIGEAAKNQAAVNPERTVFDVKRLIGRKFEDKEVQRDMKLVPYKIVNKDGKPYIQVKIKDGETKVFSPEEISAMILVKMKETAEAFLGKTIKDAVVTVPAYFNDAQRQATKDAGVIAGLNVARIINEPTAAAIAYGLDKKGGEKNILVFDLGGGTFDVSILTIDNGVFEVLATNGDTHLGGEDFDQRVMEYFIKLIKKKHGKDISKDNKALGKLRREAERAKRALSSQHQVRVEIESLFDGVDFSEPLTRARFEELNNDLFRKTMTPVKKAMEDAGLAKNQIDEIVLVGGSTRIPKVQQLLKDYFDGKEPSKGVNPDEA…	0	79.183	0	25.937	15	35	3	3.417	17.96	6.14693	3	5	50.57	21.8891	13	16	12.75	2.54873	2	4	20.58	14.093	7	7	7.55	6.29685	3	3	1	1	0	1	0	3	CIP	ITAG only
Solyc03g082960	Serine/threonine phosphatase family protein (AHRD V1 **** C1E0J1_9CHLO); contains Interpro domain(s) IPR015655 Protein phosphatase 2C	AT4G27800	MALSSPHLQKVLLNKICSYKITSKKSIIQKPLGGGGGGGGEGRGRCSSAIAIDAPAPFTSVSGIRWGSTMVQGPREEMEDDAVIVQSDDLDGFTYAAVFDGHAGFSSVKFLREELYKECVLALQGGPLLNRKDLNAIRKALQEAFENADRELLNRLESSEKEDESGATATALFVGNDTLIIAHVGDSSVVLSRSGKTEILTNSHRPYGNNKVSLQEIRRINEAGGWIVNGRICNDISVSRAFGDMRFKTKKKEMLEKGVKERRWSEKFISRIQFRGDLVIASPDVLQVNLGSDAEFVLLASDGLWDYMKSDEIVDFVRNQLREHGDVQIACEALARLALDRRTQDNVSIVIADLGRTDWRNLPVKKQNVVLELGQALVTISFVSIGIWLSTMISP	0	14.126	0	9.87342	3	7	3	0.778	NA	0	NA	NA	3.28	3.5443	1	1	2.69	3.79747	1	1	4.74	2.53165	1	2	8.3	9.87342	3	3	1	1	1	1	0	4	WTSP	Detected by both ITAG and Atlas
Solyc03g082970	PDE225/PTAC7 (AHRD V1 ***- D7M329_ARALY)	AT5G24314	MAASTLTFSSFSTLQTFPRIAALENKKRVNLCIRAQSASNSKNEGRGERRIWRRRKLTKKDETLDAKMERIPFLEEQVRKIRDGGKLLTMDIHRLLLNEDNRFDFVNEIAAEAKQYVENNRDEYGAKKAILHVLSNRMNDAGVYRSEAYMDSDPFKPGPGYLKDELL	0	12.997	0	13.1737	2	4	2	1.154	12.45	13.1737	2	4	NA	0	NA	NA	NA	0	NA	NA	NA	0	NA	NA	NA	0	NA	NA	0	0	0	0	1	1	WTSP	Detected by both ITAG and Atlas
Solyc03g083090	Glycogen synthase (AHRD V1 ***- D5MWN9_BACSU); contains Interpro domain(s) IPR011835 Glycogen/starch synthases, ADP-glucose type	AT5G24300	MGSLRTPTNLSNKSCLCVSGRVVKGLRVERQVGLGFSWLLKGRRNRKVQSLCVTSSVSDGSSIAENKKVSEGLLLGPERDGSGSVVGFQLIPHSVAGDATMVESHDIVANDRDDLREDAEEMEETPIKLTFNIIFVTAEAAPYSKTGGLGDVCGSLPMALAARGHRVMVVSPRYLNGGPSDEKYANAVDLDVRATVHCFGDAQEVAFYHEYRAGVDWVFVDHSSYRRPGTPYGDIYGAFGDNQFRFTLLSHAACEAPLVLPLGGFTYGEKCLFLANDWHASLVPLLLAAKYRPYGVYKDARSIVAIHNIAHQGVEPAATYNNLGLPPQWYGALEWIFPTWARAHALDTGETVNVLKGAISVADRILTVSQGYSWEITTPEGGYGLHELLSSRQSVLNGI…	0	64.716	0	23.2449	14	42	14	4.179	21	9.51638	6	7	13	9.67239	5	5	26.1	14.5086	7	10	29.25	13.4165	7	11	27.21	11.0764	6	9	1	1	1	1	1	5	WTSP	Detected by both ITAG and Atlas
Solyc03g083280	Pentatricopeptide repeat-containing protein (AHRD V1 *-*- D7KJV7_ARALY); contains Interpro domain(s) IPR002885 Pentatricopeptide repeat	AT3G49240	MALSKHIFLTHHLRTLAKPHYLRHPQPPPSFISLRLLSFATPEEAAAERRKRKRRLRIEPPLSSLRQQHQPRPTTPQNPSSTNNPNAPKIPETVSVLSGNRLNLHNRILKLIRENDLDEAALYTRHSVYSNCRPTIFTCNAVMAAQLRQSRYSDLLSLHRFITQAGIGANIVTHNLLLTAFMDCRKTDMAMEHYKQLINNAPFNPSPTTYRILIKGLVDNNKIDRAMELKEEMLSKGMGEKRCRPDTLSYNNLIEQLCKNDLLGEAEELYKDMGEKGVSPDEFTFVLLMDTCFKESRPDDAAAYFKTMVESKLRPNLGVYDRLVDGLVKVGKVDEAKSFFDLMMGKLRMNDDSYKFMMNALFDIGQHDEVLKIVDRMLREDPADFSDELQEFVREALAK…	0	28.972	0	13.5827	6	13	6	0.738	13.55	11.2205	5	5	7.08	6.10236	2	2	5.22	5.11811	2	2	7.42	6.10236	2	2	5.82	5.31496	2	2	1	1	1	1	1	5	WTSP	Detected by both ITAG and Atlas
Solyc03g083370	Lipase class 3-like	AT2G05260	MASEREIFSLSGPLYLIAIDWSNTCHRRSIAASLVQGVYILERDRQQNRQGFNALAPPWWEFFHFQLIQVLVDNEDQSYFGAIYEYKFPNSHFHNKTKNDIQNQNQNPPKYVIAFRGTITKKGNRSQDFKINLTLIRDNLHNCSRFHIGLQVVHNIVQNHEISDIWLTGHSLGSSIALLIGRNMVKTGIDLETYLFNPPFTSLPVEKITKNEKLKHGIRITHSVLTAGLASAVNICKSKSINKSESITLLSSWIPYLFVNPSDPICAEYVGYFEHREKMAAIGKGEIGRIATQNSIRSIIGNAIGKDQLEPSHLLPSANVAINLSPSPDFKRAHGIHQWWNPDVQCNYKLYQFR	0.036	1.515	90	3.38983	1	1	1	0.259	NA	0	NA	NA	NA	0	NA	NA	NA	0	NA	NA	2.39	3.38983	1	1	NA	0	NA	NA	0	1	0	0	0	1	1 PSM	ITAG only
Solyc03g083430	Splicing factor 3a subunit 3 IPR000690 Zinc finger, C2H2-type matrin	AT5G06160	MSSTLLEVTRASHEEVERFERLIVKDLQTEPATNKDRLHQSHRVRNMIEQIIDTTHKLVDIYEDKDGARKDEIAALGGQTATGTNVFSAFYDRLKEIREYHRRHPAARAIIDTGDEYEQLLKEEPQIEFSGEEGSGRYLDLHELFNEYINSKFGEPIEYTAYLNVFSEPQKIPRKAKTTRRYLEYLQKLLEYLVYFFERTEPLQDLDRIFSKVTSEFEEEWTLGKVEGWENNGQENGSAPENYTVIDLDYYSTAEELMVVGPEKLKEALGALGLKTGGTIQQRAERLFLTKNISLEKLDRKHFAKGSWKPEQNSVVATSHVGDVKEIALLEAKIRRLCDLLDETIVRTRENVEKKQALTYEEMEAEREEDDVQAESESDDEDQQIYNPLKLPMGWDGKP…	0	5.865	0	3.92927	2	2	2	0.194	NA	0	NA	NA	2.2	2.35756	1	1	NA	0	NA	NA	2.59	1.57171	1	1	NA	0	NA	NA	0	1	0	1	0	2	Sporadic	ITAG only
Solyc03g083440	Glutamate synthase (AHRD V1 **** C1E4G5_9CHLO); contains Interpro domain(s) IPR012220 Glutamate synthase, eukaryotic IPR006005 Glutamate synthase, NADH/NADPH, small subunit 1	AT5G53460	MPKKRTRVQSSATYPPMSIASSSVLQSKNNGVVMSSPVKSLVGHQLNAMPLGRVGVGLGRTRVTRSSVVKRTTGFEKKFYGAKLRASGPERLHLWQSDGPGRAPKLRVVVRSALSQVPEKPLGLYDPSFDKDSCGVGFVAELSGESSRKTVADAIEMLVRMSHRGACGCETNTGDGAGILVGLPHDFYKEVTSEAGFEIPPPGQYAVGMFFLPTSDSRREQSKIVFTKVAESLGHTVLGWRPVPTDNSGLGKSALQTEPIIEQVFLTPTPRSKVDFERQMYILRRVAMVAIRAALNLQHGGVKDFYVCSLSSRTVVYKGQLKPNQLKEYYFADLGNERFTSYMALVHSRFSTNTFPSWDRAQPMRVLGHNGEINTLRGNVNWMRAREGLLKCKELGLSK…	0	190.426	0	19.0476	35	83	35	1.501	109.83	13.2075	25	32	70.65	8.76011	14	22	44.73	8.84996	14	17	13.31	3.2345	5	5	22.38	3.2345	5	7	1	1	1	1	1	5	WTSP	Detected by both ITAG and Atlas
Solyc03g083520	Calmodulin IPR011992 EF-Hand type	AT1G12310	MGKDLSNDQISSMKEAFTLFDTDGDGKIAPSELGILMRSLGGNPTQAQLKSIIAEEKLNAPFDFNRFLELMSKHLKPEPFDRQLRDAFKVLDKDSTGYVVVADLKHILTSIGEKLEASEFDEWIREVDVGSDGKIKYEEFIARMVAKWVI	0	21.774	0	38	5	7	4	1.894	NA	0	NA	NA	14.8	30	4	5	NA	0	NA	NA	2.39	10.6667	1	1	2.2	8	1	1	1	1	0	1	0	3	CIP	ITAG only
Solyc03g093240	GTP-binding protein YqeH (AHRD V1 **-- C6VPQ3_LACPJ); contains Interpro domain(s) IPR002917 GTP-binding protein, HSR1-related	AT3G47450	MAPKLLALSSLSSICPFSIPNSSSSNLNLYRYHTTKPTLIFCKSTEPQTISESEPEGYGAAAPTRGDIYLQRQQVVAASSSVLATTKKKKKKDNIFKISKLAPCCYGCGAPLHTSEVDAPGYVDQETYELKKKHHQLRKILCGRCRLLSHGHMITAVGGNGGYSGGKQFVTAEELREKLSHVRHEKALIVKLVDIVDFNGSFLARVRDLAGANPIILVITKVDLLPKDTDLNCVGDWVVEATMKKKLNVLSVHLTSSKSLVGISGVVAEIQKEKKGRDVYILGSANVGKSAFINALLNTMSYKDPVAASARKHKPIQSAVPGTTLGPIPIDAFLGGEKLYDTPGVHLHHRQAAVIHAEDLPTLAPQSRLRGQVFPSSGRNLDSQIANRMRSSGLSGLSI…	0	16.396	0	4.28571	2	9	2	0.616	NA	0	NA	NA	NA	0	NA	NA	10.73	4.28571	2	4	8.76	4.28571	2	4	2.99	2.14286	1	1	1	1	1	0	0	3	WTSP	Detected by both ITAG and Atlas
Solyc03g093520	Phosphofructokinase family protein (AHRD V1 ***- D7MV38_ARALY); contains Interpro domain(s) IPR012004 Pyrophosphate-dependent phosphofructokinase TP0108	AT5G61580	MEFSLYNSSSLRFPQNDFLPLHNRSTLGSFHTFSIKKLASKSISTCRPLIWRRLPLVRRNAQTATESNASGDKHGEDDFIVEDVPHLTHFLPDLPSYTNPLKKSQAYAIVKKTFVSPEDMVAKEIIVQKDSPRGIHFRRAGPREKVFFTPEEVRACIVTCGGLCPGINTVIREIVCGLKNMYGVDDVLGIQGGYSGFYSKNTLNLTTKVVNDIHKRGGTFLQTSRGGHDTKKIVDNIQDRGINQVYIIGGDGTQKGAAAIYKEVEKRGIKVAVAGIPKTIDNDIAVIDKSFGFDTAVEEAQRAINAAHVEAESVQNGVGIVKLMGRYSGFIAMLATLGNRDVDCCLIPESPFYLEGPGGLYEYVEQQLKENRHVLIVLAEGAGQEYVAQSMQAFQEKDA…	0	22.089	0	12.2449	5	15	4	0.682	3.6	2.78293	1	1	5.68	5.93692	2	2	11.39	7.79221	3	4	17.83	10.5751	4	6	5.74	4.26716	2	2	1	1	1	1	1	5	WTSP	Detected by both ITAG and Atlas
Solyc03g093680	Mago nashi-like protein 2 IPR004023 Mago nashi protein	AT1G02140	MGEMAENDEFYLRYYVGHKGKFGHEFLEFEFRPDGKLRYANNSNYKNDTMIRKEVFLTPSVLKECRRIVADSEIMKEDDNNWPEPDRVGRQELEIVMGNEHISFTTSKIGSLMDVQTSNDPEGLRIFYYLVQDLKCFVFSLISLHFKIKPI	0	6.003	0	16.5563	2	3	2	0.52	NA	0	NA	NA	3.9	9.93377	1	1	2.25	6.62252	1	1	2.11	6.62252	1	1	NA	0	NA	NA	0	1	1	1	0	3	CIP	ITAG only
Solyc03g093690	Peptide methionine sulfoxide reductase msrA (AHRD V1 **** D2B4D8_STRRD); contains Interpro domain(s) IPR002569 Methionine sulphoxide reductase A	AT4G25130	MLLKTCLPSSTIATKSPLISFSKSTLLLPPFSRKVSSTFPRTSKTPSLYSPPKMSWLNKLGFGARTDTPMDSSSSAIPQGPDTDIPAPGQQFVQFGAGCFWGVELAFQRVPGVTKTEVGYSQGYLDNPTYEDICSGNTFHSEVVRVQYDPKECNFDTLLDVFWDRHDPTTLNRQGNDVGTQYRSGIYFYTPEQEKAALEARDRQQKILNRNIVTEILPAKKFYRAEEYHQQYLAKGGRFGFRQSVEKGCNDPIRCYG	0	30.127	0	21.4008	7	31	4	2.384	27.33	21.4008	7	11	21.58	8.56031	3	8	13.67	11.284	4	5	11.23	12.0623	3	4	9.48	4.28016	1	3	1	1	1	1	1	5	WTSP	Detected by both ITAG and Atlas
Solyc03g094175	Pterin-4-alpha-carbinolamine dehydratase (AHRD V1 *-** B6T9C1_MAIZE); contains Interpro domain(s) IPR001533 Transcriptional coactivator/pterin dehydratase	no hits	MAAATHLSFSPPISVSSLPLRKPNFVTPNLQTSQSRICTRIRCNTNLLGDFGARDPFPAEVESKFGEKVLGNPDTEHKILIPAASALSLANQECTDISPNQTPLSEFEAKQLLFKVVGWRIANEDGVLKLQCTWKLKDFDCGVELINRIGKVVEGTGHLPTLHQLQQSNQVHAELWTPSIGGLSMNDFIIAAKIDQVKTSDLVPRKRVWA	0	10.523	0	13.8095	3	8	3	2.162	NA	0	NA	NA	NA	0	NA	NA	5.38	9.04762	2	2	9.23	9.52381	2	3	7.36	13.8095	3	3	1	1	1	0	0	3	WTSP	Detected by both ITAG and Atlas
Solyc03g095180	Superoxide dismutase (AHRD V1 **** Q7YK44_SOLLC); contains Interpro domain(s) IPR001189 Manganese/iron superoxide dismutase	AT5G51100	MAAATASATLFSPFLPSPGFHESCRSLNWRTHKKQIASKAGTVKVTAKFELNPPPYPMNALEPHMSRTTFEYHWGKHHRAYVDNLNKQIVGTELDELTLEDIILVTYNQGNLLPPFNNAAQAWNHQFFWESMKPGGGGQPSGELLKLINRDFGSFEAFVKEFKAAAATQFGSGWAWLAYKANRLDVGNASNPHPSDEDKKLVIVKTPNAINPLVWDYSPLLTIDVWEHAYYLDFRNRRPDYISIFMEKLVSWEAVSSRLEAAQAQAAEREKEEERKKREEEEEYQDGNEVREMYVETTDSEAD	0	94.211	0	34.9835	12	109	11	157.489	94.48	29.3729	11	29	62.4	31.6832	10	19	70.81	30.033	10	20	59.42	33.0033	11	19	72.29	29.703	10	22	1	1	1	1	1	5	WTSP	Detected by both ITAG and Atlas
Solyc03g095620	ABC-1 domain protein (AHRD V1 **-- A1TWJ2_MARAV); contains Interpro domain(s) IPR004147 ABC-1	AT5G05200	MAVVTVLRGVSHGRLPLLTHSQFPIVTPTNIAYRNRPNVLRVFARYSQTQDLFTSRLQDRLENLPKLVEDIVQTSLSTGPRGALRLAQGVQAVVGVGSEWLQDVSKTANSSTGLPTQLQLGLLSPLYLRKLFERMGATYIKLGQFIASAPTLFPPEYVQEFQYCFDRAPAVPFEQIQTILREELGRPIDTVFEYIDPTPVASASIAQVHGARIRGTGEDVVIKVLKPGIEDILVADLNFIYIAARILEFLSPDLSRASLVAIVKDIRESMLEEVDFNKEATNVESFRNYLEAMGLTRQATAPKVYRQYSTKRILTMERLYGVPLTDLDSIKSLVSSPETSLITALNVWFGSLLACESFHADVHAGNLWQLRDGRIGFLDFGIVGRISPKTWAAMEVFLQ…	0	30.188	0	13.7803	7	17	7	1.219	11.82	9.31099	5	5	1.66	1.67598	1	2	5.26	3.53818	2	2	14.43	9.68343	5	6	5.06	3.16574	2	2	1	1	1	1	1	5	WTSP	Detected by both ITAG and Atlas
Solyc03g095840	Eukaryotic translation initiation factor 2 alpha subunit family protein expressed IPR011488 Eukaryotic translation initiation factor 2, alpha subunit	AT5G05470	MATNSPNLECRMYEAKYPEVDQAVMIQVKSMADSGAYVALLEYNNIEGMILFSELSRRRIRSISSLIKVGRIEPVMVLRVDKEKGYIDLSKRRVSEEDISACEERYNKSKLVHSIMRHVAETMGIDLEDLYIHVGWPLYRKYGHAFEAFKLVVSDPDSILNSLTREIKEVGPDGKEVTKVAPALSEEVKDALVKNIRRRMTPQPLKIRADIEMKCFQFDGVLHIKEAMRKAEAAGNDDCPVKIKLVAPPAYVLNTQTLDKEQGIAILTKAIAACTEEIERHKGKLAVKEAPRAVSEREDKLLAEQMAKLGRENEEISGDEDSEEEEDTGMGEIDVENSGTGIRE	0	9.385	0	7.26744	3	4	3	0.438	0	4.36047	1	1	5.38	7.26744	3	3	NA	0	NA	NA	NA	0	NA	NA	NA	0	NA	NA	0	0	0	1	1	2	Sporadic	ITAG only
Solyc03g095990	Unknown Protein	AT3G56010	MRGLRRCVPVTRHNFYLLVAKSDRLETEVSDKDSENAERSYSEAITPTVNTSSFESSKTEGEVQPIGQTDSAVQEAEASNGSGTSANLEEEASSSSPKPTLKRSPLTAREKLRAARVLSRYNESKTSKPQMGSKLIEALRESEKGKMRSGLPEAPTNLFDDSKRGMPKPGWTFEFPGGIDVFLVVFSFVFISTVMFATTYIVWKVGAIHFNE	0	10.079	0	7.07547	1	3	1	0.668	NA	0	NA	NA	NA	0	NA	NA	NA	0	NA	NA	8.94	7.07547	1	2	3.06	7.07547	1	1	1	1	0	0	0	2	WTSP	ITAG only
Solyc03g096640	Dehydrogenase/reductase SDR family member 4 (AHRD V1 **-* DHRS4_RABIT); contains Interpro domain(s) IPR002347 Glucose/ribitol dehydrogenase	AT2G29290	MSTAKAAGSSRWSLSGFTALVTGGTRGIGHAVVEELAELGATVYTCSRNEAELNERLQEWAVKGLQVKGSVCDASSREQRIQLMENVSAAFDGKLNILINNVGTNIRKPTTDYTAEEYAHLFSTNLESAYHLCQLAHPLLKASGNGSVVFISSVAGLVHLSSGSIYGATKGAINQLTRNLACEWAKDNIRVNGVAPWYIKTSLVEHLLENKTFLDGVISRTPLRRPGESQEVSSLVAYLCLPGASYITGQVIAVDGGFTVNGFEMPSF	0.046	1.623	66	4.85075	1	1	1	0.212	NA	0	NA	NA	2.02	4.85075	1	1	NA	0	NA	NA	NA	0	NA	NA	NA	0	NA	NA	0	0	0	1	0	1	1 PSM	Detected by both ITAG and Atlas
Solyc03g096770	Unknown Protein (AHRD V1)	no hits	MAPTIAVPSTQTTPHHRRETSAVPESEVLRRRNEELEKELKKSFEREEKMREELQKTWKRLRVAEERLCSQLGEFEAEAVDQARAYRTRVMNLMDQLSLAQKLLQSASVVVPTSQ	0.071	1.412	104	11.3043	1	1	1	0.468	NA	0	NA	NA	NA	0	NA	NA	NA	0	NA	NA	NA	0	NA	NA	2.77	11.3043	1	1	1	0	0	0	0	1	1 Peptide	Atlas only
Solyc03g096840	Seed specific protein Bn15D1B (AHRD V1 ***- B6TIB8_MAIZE)	AT5G17165	MAANLQSRGLVSLGKRVVNQISCASARTTANSPSLSGRRGVQTSVYDKNPEDHVRDSVVPDEVIEAQSDKYWAPHPQTGVFGPADTAGAERGFHSSQATAATAESILEQKAFFRPLEDLEKPMLN	0	6.517	0	24	2	4	2	0.668	NA	0	NA	NA	8.98	24	2	3	2.51	12	1	1	NA	0	NA	NA	NA	0	NA	NA	0	0	1	1	0	2	Sporadic	Detected by both ITAG and Atlas
Solyc03g096850	Genomic DNA chromosome 5 P1 clone MKP11 (AHRD V1 **-- Q9FFJ2_ARATH); contains Interpro domain(s) IPR001478 PDZ/DHR/GLGF	AT5G17170	MASAVVAGAASSSCSVSYSRNLSITKSNSSIPSLKSSTTPSQRTSFQGLSLQEAKRGVSNTFLGAESKRNATSNGGSRGLEITARKAAAAKNIEVEVDKPLGLTLGPKQGGGVLITGIDNGGNAARAGLKVGDQVVYTSSFFGDELWPADKLGFTKTAIQAKPDSVYFVISRGADVDVKRLPKRPAPPQFGRKLTDAQKARATHICLDCGYIYTLPKSFDEQPEDYACPQCIAPKKRFARYDVNTGRAIGGGLPPIGVIIGLIAGIGGVGALLVYGLQ	0	17.677	0	18.3453	3	5	3	0.54	8.79	12.5899	2	2	NA	0	NA	NA	4.69	6.11511	1	1	5.55	6.11511	1	1	2.19	5.7554	1	1	1	1	1	0	1	4	WTSP	Detected by both ITAG and Atlas
Solyc03g097130	ATP binding protein (AHRD V1 ***- D7M885_ARALY); contains Interpro domain(s) IPR000719 Protein kinase, core	AT5G16810	MVVGGAVADCLSKCGSSFAARSSSSSFCGIGLRLNLNSNINRTIRPRQAFVGLCVASLITDSDSFEVGRLIGSYGFMNVTSYSGLQSGMAMDYAVSEDIGNFKVQDIGEGSVKIRLYEGRVAQGPLRGTRVIFKVYPGQQVGGTEADMMAANELNAHASLQSNPKDICPHIQALLGGFETKTGEQWLAFRDIGKYSAADYAKITSENMSKMIGGGEQRLWNPFELDLTIKRRRYFVVRLLHGTMRGLSYMHDNDRLHQSLGPASVVLNTVVEKDAAYLIPRLRDLAFSVDVRYSQLEDRPNILSEGLWRRASVAGASSPLERRAFGIADDIYEAGLLFAYLAFVPFCEAGVMDSISLRRLLENTFQLDLQAAREYCSADDRLLEAVKFLDLGDGAGWEL…	0	31.571	0	14.7196	7	20	7	1.462	16.79	14.7196	7	7	11.38	6.7757	3	4	5.89	4.90654	2	2	9.22	7.71028	3	3	10.75	5.60748	2	4	1	1	1	1	1	5	WTSP	Detected by both ITAG and Atlas
Solyc03g097250	Chromosome 06 contig 1 DNA sequence	AT3G02900	MATGAAPFSLSGATHVKACEPWSAKSSSFVKTPMVAIQKKSNSQGTKTSKLSIRANYSDQRGGGGNGGDFVAGFLLGGAIFGTLGYIFAPQIRRSLLNEDEYGFRKAKRPMYYYDEGLEKTRQTLNNKLDQLNSAIDKVSSGLRGGNKMPSVPVESDAEEATM	0.021	1.74	49	6.74847	1	1	1	0.212	NA	0	NA	NA	NA	0	NA	NA	NA	0	NA	NA	2.28	6.74847	1	1	NA	0	NA	NA	0	1	0	0	0	1	WTSP	ITAG only
Solyc03g097270	Cysteine proteinase inhibitor IPR000010 Proteinase inhibitor I25, cystatin	AT3G12490	MRVIRSRAILIVLFLVSAFGLSEQGKSGGFCSEEMATLGGVHDSHGSSQNSDEIHSLAKFAVDEHNKKENAMIELARVVKAQEQTVAGKLHHLTLEVMDAGKKKLYEAKVWVKPWLNFKELQEFKHVEDVPTFTSSDLGVKQVEQSSGLKSVPVHDPVVEEAAEHAIKTIQQRSNSIHPYKLQEIVHANAEMADDSTKLHLVIKTSRGGKEEKFKVQVQHNNEGAFHLNRMEPDN	0	43.439	0	28.0851	6	14	6	3.924	3.38	4.25532	1	1	40.16	28.0851	6	13	NA	0	NA	NA	NA	0	NA	NA	NA	0	NA	NA	0	0	0	1	1	2	Sporadic	ITAG only
Solyc03g097290	Alanyl-tRNA synthetase (AHRD V1 **** C1EDP7_9CHLO); contains Interpro domain(s) IPR018164 Alanyl-tRNA synthetase, class IIc, N-terminal	AT1G50200	MRVSIDGSTWRCIALALPYYYRAATLPSSAALLLPPSPAVSGRLFNFTRTFSVSKPMGSQPEVLDWPANKVRQTFISFFQGKDHKEVQSSPVVPHNDPTLLFANAGMNQFKPIFLGIVDPNSPLSKLKRACDTQKCIRAGGKHNDLDDVGKDTYHHTFFEMLGNWSFGDYFKKEAIGWAWELLTQVYKLPSERIYATYFGGDEKSGLPADNEARDLWLKFLPPSRVLPFDCKDNFWEMGDTGPCGPCTEIHFDRIGNRDAASFVNNDDPTVIEIWNLVFIQFNREADGSLKPLPAKHVDTGMGFERLTSILQNKMSNYDTDVFLPIFDAIQKATGARPYSGKVGADDVDNVDMAYRVVADHIRTLSFAIADGSCPGNEGREYVLRRILRRAVRYGTEVL…	0.002	3.824	3	2.17822	2	2	2	0.093	NA	0	NA	NA	NA	0	NA	NA	NA	0	NA	NA	4.53	2.17822	2	2	NA	0	NA	NA	0	1	0	0	0	1	WTSP	Detected by both ITAG and Atlas
Solyc03g097360	BolA-like IPR002634 BolA-like protein	AT5G17560	MTKALFVRPNVAALCIRRLSCSVQPRLSAMVKCYSIAVRSYRPMKQLSHIGLKFEAFAGHRSFSIRATSDTGSSSFDSPLMQSMEKKIKEQLDADTVVVKDAYGDGRHVSIDVIATAFEGQSAVNRQRMVYKAIWEELQNTVHAVDQMTTKTPTEAAAGK	0	18.499	0	8.75	3	16	3	1.512	11.81	8.125	2	3	11.89	8.125	2	3	13.56	8.75	3	4	9.68	8.125	2	3	10.25	8.125	2	3	1	1	1	1	1	5	WTSP	ITAG only
Solyc03g097370	DNA helicase-like (AHRD V1 **** Q9FGC2_ARATH); contains Interpro domain(s) IPR003593 ATPase, AAA+ type, core	AT5G35970	MQVKLLKMEASCNFCSSIYTLAPSCLSLRFRQKRSNLSSFIAKNRTFLDSISIRATASSSSSGGGTKAVTTRRRKPKNGGTNGGSGKNAKVSEIPAVSTKGSSGKVVDKVQVKRKKQQEECFQDDGPVNVRALHQNGDPLGRKDLGKCVVRWLSQGMRAMALDFVTAEMQGEFAELKQRMEPGLTFVIQAQPYINAVPMPLGLEAICLKACTHYPTLFDNFQRELREVLQDFQSKSSVQDWRETESWKLLKDLASSAQHKAIARKESQPKSVPGVMGMDLEKAKAIQSRIDDFANRMSDLLHIERDAELEFTQEELNAVPAPDVTSEAQKPLEFLVSHAQPEQELCDTICNLTAVSTSIGLGGMHLVLFKLEGNHRLPPTNLSPGDMVCVRICDSRGAG…	0	69.466	0	16.8186	16	37	16	2.162	11.91	5.06586	5	6	27.86	9.62513	8	9	9.89	4.86322	5	5	26.15	8.10537	8	10	19.05	6.28166	6	7	1	1	1	1	1	5	WTSP	Detected by both ITAG and Atlas
Solyc03g097470	3-oxoacyl- (AHRD V1 ***- D5A3B9_SPIPL); contains Interpro domain(s) IPR004655 Beta-ketoacyl-acyl carrier protein synthase III (FabH)	AT1G62640	MANTTIAAGPTFSLQHRHQVFGRVGVSTLRHQQGHTLFFTQAVPAIRRKFCPSIGIYQDRQSFSDGTFNSVMCSSSVEGADKVSTDQSRVLRLGNRGCKLIGCGSAVPSLNVSNDDLAKIVDTNDQWISVRTGIRNRRVLSGKDSLTDLAAEAARKALEMAEVDPDDVDLILLCSSTPEDLFGSAPQVQRALGCKSNPLSFDITAACSGFMLGLVSAACYIRGGGFKNVLVIGADALSRYVDWTDRGTCILFGDAAGAVVVQACDIGEDGLFGFDLHSDGGGQRHLNALIKDNETDHAFGTNGSVIGFPPSNSSYSCIQMNGKEVFRFAVRVVPQSIEAALENAGLPRSKIDWLLLHQANQRILDAVATRLEVPPEHVISNLANYGNTSAASIPLALDE…	0	61.682	0	18.5615	8	40	8	5.31	36.95	15.7773	7	11	27.12	17.4014	7	8	32.66	15.7773	6	10	24.8	14.6172	6	8	6.67	4.64037	2	3	1	1	1	1	1	5	WTSP	Detected by both ITAG and Atlas
Solyc03g097790	V-type proton ATPase subunit C (AHRD V1 **** VATC_ARATH); contains Interpro domain(s) IPR004907 ATPase, V1 complex, subunit C	AT1G12840	MASRYWVVSLPVQQNSSTTSLWSRLQESISRHSFDTPLYRFNIPNLRVGTLDSLLALSDDLIKSNSFIEGVCSKTRRQIEELERVSGVLSSSLTVDGVPVDSYLTRFAWDEAKYPTMSPLKEIVDGIHSQVAKIEDDLKVRVSEYNNVRSQLNAINRKQTGSLAVRDLSNLVKPADVVTSEHLTTLLAVVSKYSQKDWLSSYETLTTYVVPRSSKMLYEDNEYALYTVTLFNRDADNFKNKARERGFQIRDFEHNPETQESRKQELEKLMQDQETFRSSLLQWCYTSYGENSNNLVYYILTSL	0	21.778	0	12.2112	3	16	3	0.968	10.31	9.24092	2	3	11.32	9.24092	2	3	8.74	12.2112	3	3	11.58	12.2112	3	5	2.63	3.9604	1	2	1	1	1	1	1	5	CIP	Detected by both ITAG and Atlas
Solyc03g097800	V-type proton ATPase subunit C IPR004907 ATPase, V1 complex, subunit C	AT1G12840	MVFSSWMHFCAVRIFAESILRYGLPPSFLSVVLAPSIKSEKKVRSILESLCDSSNSNFWKADDEGGMAGFGGDTEAHPYVSFTINLV	0.004	2.226	10	9.1954	1	3	1	0.778	NA	0	NA	NA	2.4	9.1954	1	1	1.8	9.1954	1	1	0	9.1954	1	1	NA	0	NA	NA	0	1	1	1	0	3	1 Peptide	ITAG only
Solyc03g097910	Dihydroorotate dehydrogenase family protein IPR005720 Dihydroorotate dehydrogenase, class 1, core	AT3G17810	MASLGLAQRIRIGLDGNSGVENPVMGRAGRLNFGRKRVGFRIMALEGQSVEPDLSVTVNGLKMPNPFVIGSGPPGTNYTVMKRAFDEGWGGVIAKTVSLEADKVKNVTPRYAKLRADANGSAKGQIIGWQNIELISDRPLETMLKEFKQLKEEYPDRILIASIMEEYNKAAWEELIYRCEETGIDAFEINFSCPHGMPERRMGAAVGQDCDLLEEVCGWINAVATVPVWAKMTPNITDITKPARVALNQGCEGVSAINTIMSVMGINLDTLRPEPCVEGYSTPGGYSSKAVHPIALAKVMNIARMMKSEFGDKDYSLSAIGGVETGGDAAEFILLGADTVQVCTGVMMHGYGLVKTLCSELKDFMRKHNFSSIEDFRGTSLEYFTTHTDLVRRQQEAIR…	0	37.036	0	20.7459	8	23	7	3.084	18.29	11.4219	4	6	13.09	8.39161	3	4	18.91	15.6177	6	7	7.61	7.22611	3	4	6.02	5.12821	2	2	1	1	1	1	1	5	WTSP	ITAG only
Solyc03g098000	At1g32160/F3C3_6 (AHRD V1 ***- Q9FVR1_ARATH); contains Interpro domain(s) IPR008479 Protein of unknown function DUF760	AT1G48450	MSPSGIKLYPSISHVKLSNRKVAFGSRKYTAIRASVSPSESGGSAAPIAPLQLESPIGQFLCQILTSHPHLVSAAVDQQLELLKIDRDAEQQKEEPSIAGTDIVLYRRIAEVKANERKKTLEEILYALVVQKFMDANVSLVPAISPSSSEPSGRIDTWPSQDDKLEHLHSAEANEMIQNHLSLILGSRLGDDSAVAQISKLRVGQVYAASIMYGYFLRRVDQRFQLEKSMKVLPPGVDNEDSSIQQVAGEDISGDRSDTSFRSTTQTHPELTSWSAGGVSPGGFGQGIKPSRLRNYVMSFDGETLQRYATIRSREAIGMIEKHTEALFGRPEIVITPQGTIDSSKDELIKISFGGLRRLVLEAVTFGSFLWDVESYVDSRYHFVAN	0	25.154	0	10.6218	4	19	4	1.683	13.78	8.54922	3	5	6.65	6.73575	2	2	12.46	8.80829	3	5	9.71	8.80829	3	4	7.65	5.44041	2	3	1	1	1	1	1	5	WTSP	Detected by both ITAG and Atlas
Solyc03g098050	Calmodulin 3 protein IPR011992 EF-Hand type	no hits	MAEQLTEEQIAEFKEAFSLFDKDGDGCITTKELGTVMRSLGQNPTEAELQDMISEVDADQNGTIDFPEFLNLMARKMKDTDSEEELKEAFKVFDKDQNGFISAAELRHVMTNLGEKLTDEEVDEMIREADIDGDGQVNYEEFVRMMLAK	0	6.939	0	16.1074	2	4	1	0.668	1.91	4.69799	1	1	2.1	4.69799	1	1	NA	0	NA	NA	4.29	11.4094	1	1	3.48	11.4094	1	1	1	1	0	0	0	2	Sporadic	ITAG only
Solyc03g098230	Pyridoxal phosphate-dependent enzyme D-cysteine desulfhydrase family (AHRD V1 **** D0LXJ6_HALO1); contains Interpro domain(s) IPR005966 Pyridoxal phosphate-dependent deaminase	AT1G48420	MSSCQWSSFTRVSLSPFPLQPAQLNTALNLKKQCCFTKSSMEDSSSQGHQSAFQFLTKKPYEPPPWASLLSPIPSHTFSLGHFPTPIHKWNLPNLPKNTEVWLKRDDMSGMQLSGNKVRKLEFLLADAVAQGADCIVTIGGIQSNHCRATAVAAKYLNLDCYLILRTSKLLVDKDPGLTGNLLVDRLVGAHIDLVSKEEYAKVGGEALTKILKEKLLNEGRKPYVIPVGGSNSLGTWGYIEAIRELEQQLQHLSIEQKFDDIVVACGSGGTVAGLSIASMLSGLKAKINAFCVCDDPDYFYEYVQGLLDGITAGVSSRDIVSIKTAKGLGYALSTTDELKFVKQVAETTGVILDPVYSGKAAYGMMKDMGENPTKWEGRKILFIHTGGLLGLYDKADEI…	0	27.021	0	22.3529	7	10	7	1.404	10.16	9.17647	3	3	11.03	11.0588	3	3	6.15	7.52941	2	2	3.02	4	1	1	0	2.58824	1	1	1	1	1	1	1	5	WTSP	Detected by both ITAG and Atlas
Solyc03g098440	Small glutamine-rich tetratricopeptide repeat-containing protein A (AHRD V1 *--- C1BM93_OSMMO); contains Interpro domain(s) IPR011990 Tetratricopeptide-like helical	AT3G17670	MSAIHLSTLRSISQQPFSLFLLFPLPKFKSINNTRIKASSVKEEEVERKMEIRVCTERACRKQGSLDTLQVLSGIAPPFVAVNSCGCLGRCGAGPNVVVLPGAVYVKHVGTPTRTAEVMAFVCLGRDDVEGESRRSLEALALRKRAEDEMGNGNFSEAHGLLSQAIALKPFGGVHIMLKDRCAAELAMGNLAEALEDSKEALNIAPNYPEGYICQGDVLMALDHVDAAERSYSMALELDPSIRRSKSFKARITKLNEKLALANSA	0.035	1.804	49	3.01887	1	3	1	0.212	NA	0	NA	NA	NA	0	NA	NA	1.91	3.01887	1	1	2.47	3.01887	1	1	0	3.01887	1	1	1	1	1	0	0	3	WTSP	Atlas only
Solyc03g098720	Kunitz trypsin inhibitor IPR011065 Kunitz inhibitor ST1-like	no hits	MKSVVLVISIFVVAFWCSCTNASPNQGLLKLVYDINGEILRSDTRYFVVSEKIRTGVVRGPVLFNGDANIVCPFQVMQSPREFDRGMSVYFKPKAPKQVEITESSDVNIEFDLGNPTVCNNNVWMVEGFPLQSDNPMYLSTNGKAGYVASWFQIKEVEGNNSTDYKLMFCHYGDENICTDIGIDHTSGRLAIRTGNTFNVVFIKDPFIGII	0.002	3.758	3	5.21327	1	1	1	0.389	NA	0	NA	NA	2.64	5.21327	1	1	NA	0	NA	NA	NA	0	NA	NA	NA	0	NA	NA	0	0	0	1	0	1	1 PSM	ITAG only
Solyc03g098730	Kunitz trypsin inhibitor IPR011065 Kunitz inhibitor ST1-like	no hits	MALTPFLVAIILSTSFLFLVKAQNISEPVLDISGNPLVKGSQYFIVPVSGRSNEGGLDVSSIRNTVDTLVVTQNAQSSVGKSLRFTPVDANENIVRLSTDLNVKFMNIIFSDNMSTVWTINTRLIPQRNLVSVGGVEGNPGRDTLGNWFKIDKYEEAYKFVYCPGVCETCRPFCGDIGILVEPNNKRVLFVGSDKPLKVTFENTTSVVTVTKAPPTPSASHPDRLSTMSFINLVMCIVIAYLTKLM	0	13.601	0	21.1382	5	10	5	1.61	2.14	3.65854	1	1	9.15	17.8862	4	4	2.63	4.87805	1	1	6.31	13.0081	3	3	2.31	4.87805	1	1	1	1	1	1	1	5	CIP	ITAG only
Solyc03g098760	Kunitz-type protease inhibitor-like protein IPR011065 Kunitz inhibitor ST1-like	no hits	MMTTKCLFLLCLCLVPFVVFSSTFTSQNPIDLPSAKPVPILDTNGKELDPRSSYRMVYTNRGPYGGDIYLDYSPGSTAPCPDGVFRYGQVGPMGTPVRLITPSHFGPGVYEEQQIKIQFVISNVEKCGDYTIWKVGPYDREERTSFLETGQQDSKSCFKIVKSPRLLGYELLTCDGALVGTMGQRVALVANYSLDFDFEKVED	0	7.179	0	11.8227	2	3	2	0.931	NA	0	NA	NA	8.19	11.8227	2	3	NA	0	NA	NA	NA	0	NA	NA	NA	0	NA	NA	0	0	0	1	0	1	Sporadic	ITAG only
Solyc03g098780	Kunitz-type protease inhibitor IPR002160 Proteinase inhibitor I3, Kunitz legume	no hits	MNMMKCLFLLCLCLFPIVVFSSSFTSQNPIELPNDSTSGKPVLDTSGKEVTSHSSYRIISAFWGALGGDVYLGESPNSDAPCPNGVFRYNSDRGPRGTPVKFIPHSEGMSENKLFNIQFDIPTFRLCVKYTIWKVGDYNETLGGVLLETGGSIGQRDSSYFKIVPSKLGYNLVLCDPTPIFCPFCRKGQLCVNVGVVFQDGRRRLALTKDQPLDVLFEEIK	0	13.028	0	16.2896	3	7	3	2.162	5.24	10.8597	2	2	7.48	16.2896	3	3	2.9	5.42986	1	1	2.53	5.42986	1	1	NA	0	NA	NA	0	1	1	1	1	4	CIP	ITAG only
Solyc03g098790	Kunitz-type protease inhibitor (AHRD V1 **** Q3S488_SOLTU); contains Interpro domain(s) IPR002160 Proteinase inhibitor I3, Kunitz legume	no hits	MMKCLFLLCLCLFPIVVFSSSFTSQNPIELPSASPKPNPVLDTNGNELNPNSSYRIISTFWGALGGDVYLGKSPRSSAPCLDGVFRYNSDVGTVGTPVRFIPLSGGIFEDQLMNLQFNIATVKLCVSYTIWKAGNLNAYYRAMLLETGGSIGQVDSSYFKIVKASTFGYNLLYCPITRPVLCPFCRGDDFCAKVGVINQDGRRRLALVNENPLGVYFKKV	0	12.609	0	13.1818	3	5	3	1.371	6.97	13.1818	2	2	9.69	13.1818	3	3	NA	0	NA	NA	NA	0	NA	NA	NA	0	NA	NA	0	0	0	1	1	2	Sporadic	Detected by both ITAG and Atlas
Solyc03g110960	Nucleoside diphosphate kinase (AHRD V1 **** B9RAM1_RICCO); contains Interpro domain(s) IPR001564 Nucleoside diphosphate kinase, core	AT5G63310	MESLCIVRASPCVSSSSSLSSKTSSLSCAPSCRVILNPIKKHHNLAAFQPAFHLFASTQSGPHGSKRNHTARIFLPHLVASMEEVEETYIMIKPDGVQRGLVGEIISRFEKKGFKLTGLKLFQCPKELAEEHYKDLQSKSFFPKLIDYITSGPVVCMAWEGIGVVASARKLIGATNPLNAEPGTIRGDLAVQTGRNVVHGSDSPENGKREIALWFKEGELSSWTPAQQPWLTE	0	50.723	0	36.9099	9	83	4	9	51.51	29.1845	7	16	65.12	27.0386	7	19	55.17	30.9013	8	17	52.51	30.9013	8	17	41.15	27.897	7	14	1	1	1	1	1	5	WTSP	Detected by both ITAG and Atlas
Solyc03g111050	Plastid RNA-binding protein (AHRD V1 **-- D6QX33_NICBE); contains Interpro domain(s) IPR003029 Ribosomal protein S1, RNA binding domain	AT3G48500	MQTLQTCSFFFTFPSPKTLLKPINSSKFTSFPFFNLSTSSNFKHSPLTLHCFSSDEYPVGDDDAFLEAFGPKEKESEEEARRRNWVDRGWAPWEEILSPEADFARKSLNEGEEVALQSPEAIEAFRMLSPNYRKKKIEEMGITEDEYYAKQFEIKGDIPEPLETTWAGPLVVRHVPPRDWPPRGWEVDKKELEFIREAHKMQAVRVDYDKVEEMVNTETDDMSLERYKVFLKQYNEWVAANKDRLEEESYKYDQDYYPGRRKRGKDYQDGMYELPFYYPGQICAGKVTAIHLYQGAFVDIGGVHDGWVPIKRNDWYWIRHHIKVGMHVMVEILAKRDPYRFRFPIEMRFVDPNIDHLIFNRFDFPPIFHREEDTNLDELRRDCGRQPIPRKDPGVKVEE…	0	51.459	0	15.3734	9	18	9	1.264	33.82	13.9092	8	10	5.8	4.5388	2	2	5.82	4.39239	2	2	3.48	2.63543	1	1	7.35	6.00293	3	3	1	1	1	1	1	5	WTSP	Detected by both ITAG and Atlas
Solyc03g111200	Adenylate kinase (AHRD V1 ***- D7MQ61_ARALY); contains Interpro domain(s) IPR006259 Adenylate kinase, subfamily	AT5G63400	MSTSSVNLEDVPSESLMSELLRRMRCSSKPDKRLILIGPPGSGKGTQSPIIKDEYCLCHLATGDMLRAAVAAKTPLGIKAKEAMDKGELVSDDLVVGIIDEALKKPSCQKGFILDGFPRTVVQAEKLDVMLQNRGTKVDKVLNFAIDDAILEERITGRWIHPASGRSYHTKFAPPKVPGIDDVTGEPLIQRKDDTAAVLKSRLEAFHRQTEPVIDYYAKKGNVVNLPAEKPPQAVTAEVKKVLS	0	5.463	0	7.78689	2	2	2	0.311	NA	0	NA	NA	3.91	7.78689	2	2	NA	0	NA	NA	NA	0	NA	NA	NA	0	NA	NA	0	0	0	1	0	1	CIP	Detected by both ITAG and Atlas
Solyc03g111260	Metallo-beta-lactamase family protein (AHRD V1 *-*- A3ERL5_9BACT); contains Interpro domain(s) IPR001279 Beta-lactamase-like	AT5G63420	MAAAFSAISLCPYKLCHQLNPRKHFISCYTPSTSSIGIRGSKGPRKRPDKLEGAGRSIDDSVQRRMEQFYEGSDGPPLRVLPIGGLGEIGMNCMLVGNYDRYILIDAGIMFPGYDEPGVQKIIPDTTFIKKWSHKIEAVIITHGHEDHIGALPWVIPALDSHTPIFASSFTMELIKKRLKEFGIFVPSRLKVFKTRRKFTAGPFEVEPITVTHSIPDCSGIVLRCSDGTILHTGDWKIDESPLDGKVFDREALEELSKEGVTLMMSDSTNVLSPGRTLSETVVADSLLRRISAAKGRVITTQFASNIHRLGSVKAAADLTGRKLVFVGMSLRTYLDAAWKDGKAPIDPSTLVKVEDIDAYAPKDLLIVTTGSQAEPRAALNLASYGSSHSLKLNKEDLV…	0	54.986	0	17.6056	15	36	15	1.26	29.98	10.5634	8	11	15	7.15962	5	6	21.59	8.68545	7	8	18.72	6.22066	5	7	9.11	4.92958	4	4	1	1	1	1	1	5	WTSP	Detected by both ITAG and Atlas
Solyc03g111340	Ubiquitin-like modifier-activating enzyme 5 IPR009036 Molybdenum cofactor biosynthesis, MoeB	AT1G05350	MEVELKELLSDLHSLKKSISDPSHLALIEKMHLHAENIATLEKSGTIRRSKVKDMSAEVVDSNPYSRLMALQRMGIVNNYERIREFSVAIVGIGGVGSVAAEMLTRCGIGRLLLYDYDKVELANMNRLFFRPEQVGMTKTDAAVQTLSEINPDVVLESYTLNITTVEGFDTFMSSLTNKSFRPTKSGSGVDLVLSCVDNYEARMVVNQACNELNQTWMESGVSEDAVSGHIQLLIPGETACFACVPPLVVASGIDERTLKREGVCAASLPTTMGVVAGLLVQNTLKYLLKFGQVSRYLGYNALKDYFPTMEMKPNSQCSNAACLERQKEYILAKPTRDAAAKAKADIEAVSPAENPVHADNEWNISVVDDEEVDGSDVKNSGVLPEGIVHELPVADDYP…	0.002	3.6	3	4.22535	1	3	1	0.145	2.98	4.22535	1	1	7.38	4.22535	1	2	NA	0	NA	NA	NA	0	NA	NA	NA	0	NA	NA	0	0	0	1	1	2	1 Peptide	ITAG only
Solyc03g111380	Tubulin beta-1 chain IPR002454 Gamma tubulin	AT5G05620	MPREIITLQVGQCGNQIGMEFWKQLCLEHGISKEGILEDFATQGGDRKDVFFYQADDQHYIPRALLMDLEPRVINGIQNGEYRNLYNHENVFIADHGGGAGNNWASGYHQGKQYEEDLMDMIDREADGSDSLEGFVLCHSIAGGTGSGMGSYLLETLNDRYSKKLVQTYSVFPNQNETSDVVVQPYNSLLTLKRLTLNADCVVVLDNTALNRIAVERLHITTPTFTQTNSLVSTVMSASTTTLRYPGYMNNDLVGLLASLIPTPRCHFLMTGYTPLTVERQANVIRKTTVLDVMRRLLQTKNIMVSSYARTKEASQAKYISILNIIQGEVDPTQVHESLQRIRERKLVNFIEWGPASIQVALSRKSPYVQTAHRVSGLMLASHTGIRHLFSKCLTQYDK…	0.001	4.255	2	2.53165	1	1	1	0.129	NA	0	NA	NA	2.24	2.53165	1	1	NA	0	NA	NA	NA	0	NA	NA	NA	0	NA	NA	0	0	0	1	0	1	1 PSM	ITAG only
Solyc03g111610	HAD-superfamily hydrolase subfamily IA variant 3 containing protein expressed (AHRD V1 **** Q10I42_ORYSJ); contains Interpro domain(s) IPR005834 Haloacid dehalogenase-like hydrolase	AT3G48420	MALRVVSSSPAIFSSQRRAASVLPSTLTLPNTNSSLLSSSSPISSIDRTKSVVTLRSKTSRRSGVVTCSASVLPKALLFDCDGVLVDTEKDGHRISFNDTFSEKELGVTWDVDLYGELLKIGGGKERMTAYFNKVGWPENAPKTEEERKEFIAGLHKRKTELFMVLIEKKLLPLRPGVEKLIDQALGNGVKVAVCSTSNEKAVSAIVSCLLGPERAEQIQIFAGDVVPRKKPDPAIYLLAAETLAVDPSSCVVVEDSGIGLAAAKAAGMTCIVTKSGYTAEENFSNADAVFDCIGDPPEERFDLAFCGSLLEKQYVS	0	73.713	0	31.2303	13	122	13	16.191	81.49	27.7603	12	31	61.32	28.0757	10	23	70.33	22.7129	7	23	56.8	22.7129	8	20	68.99	23.6593	8	25	1	1	1	1	1	5	WTSP	Detected by both ITAG and Atlas
Solyc03g111700	Inactivated Zn-dependent hydrolase of the beta-lactamase fold (AHRD V1 ***- B5ILK8_9CHRO)	AT1G29700	MAIDCKFVPYLTPKQIVFPFPATEKVTKFKLSPACCFPFLISSYSSSLPLRPTVISAYKKNVVESNYYEDTFTLTYLEGNSWLWEVGGIKILVDPILVGNLDFGIPWLYDAAKKFVKNFQLDDLPLIHCLLITQSLDDHCHLNTLKPLSRKFPNLTVIATPNAKTLLDPLFTNVIYLEPGQDSAIEVSNGFQVKIKATAGPVLGPPWQRPENGYLVTSPKGALTLYYEPHCVYDKSTLEKHRADIVITPVIKQLLPNFTLVSGQEDAVQLAKCLFARFVVPMKNGDLDSKGLLASIVKSEGTMESFKQLLSKELPDAKVVEPTPGEPLDISIPVHGQ	0	31.571	0	17.8042	5	24	5	2.831	26.17	17.8042	5	8	23.29	15.1335	4	8	4.49	5.34125	2	2	6.88	9.49555	3	3	6.12	5.34125	2	3	1	1	1	1	1	5	WTSP	Detected by both ITAG and Atlas
Solyc03g111820	Sieve element-occluding protein 3 (AHRD V1 **-- B5THF7_MEDTR)	AT3G01670	MASNALVSAATTRGVKPTQHAMVKRERPIFSLSDDHAMFKKILDTHDPDGREVDVDVILHIVEDVFQHSYPAAMDGVLNGTGTDHLEANVGALKLEEKTSLAFDGILEGLAYIIHKVSCELTCNCSSGGHDTHSTTMSVLEMLSNYHWDAKLVICLAAFAVTYGEFWLVAQLFGTHPLAKSVAILKQLPDIMEHHGSLKSRFDAINELIKAILDVTKSIMEFKKLPFQYITEDQPPLSVAITHVPTAVYWTIKSIVACAFQLTTLSGMSYDMIVATTADTWEMSSSTHKLKNISKHLGAELNRCYQHIQEKMHIEYFQMLVHLFEATQFDNMKIMRAMIYIKDDLLPLEVGTTQTRAIVEVLRRKTVLLLLSDLEASHEEILVLSQIYLESRSRPEIQY…	0	7.021	0	4.22764	2	2	1	0.212	0	1.78862	1	1	3.3	2.43902	1	1	NA	0	NA	NA	NA	0	NA	NA	NA	0	NA	NA	0	0	0	1	1	2	Sporadic	Detected by both ITAG and Atlas
Solyc03g111830	Protein-L-isoaspartate O-methyltransferase (AHRD V1 **** B9I3I9_POPTR); contains Interpro domain(s) IPR000682 Protein-L-isoaspartate(D-aspartate) O-methyltransferase	AT5G50240	MPSSISLHSVSAIAYGFRYRAPLKHACLLYAHHLHSFHRQKSPLFSSSFCRVLNPYSFTGNSRFSRMEQFWSGSAGNRNKGMTEQLRRCGVIKSQKVIEIMETVDRGLFVPEGTPAYVDSPMSIGYNATISAPHMHAMCLELLEDRLQPGMHALDVGSGTGYLTACFALMVGPQGRVVGVEHIPELVAWSIKNVEKSAAAPLLKEGSLSLHVGDGRKGWPEHAPYDAIHVGAAAADVPQDLIDQLKPGGRMVIPVGTFFQDLKVIDKKLDGSISVRSETSVRYVPLTSREAQINGTD	0	22.206	0	13.8047	3	15	3	1.154	8.45	13.8047	3	3	8.45	9.42761	2	3	12.23	13.8047	3	4	11.32	9.42761	2	4	3.33	4.0404	1	1	1	1	1	1	1	5	CIP	Detected by both ITAG and Atlas
Solyc03g111840	Polyadenylate-binding protein 1-like (AHRD V1 **-- PAP1L_HUMAN); contains Interpro domain(s) IPR000504 RNA recognition motif, RNP-1	AT4G24770	MSSLTKPLIKNLSMATNSCLISLPPFFTTTKSMSFISTPLKPISLSSSLSLKKTTTQFPSIVSVVAALQDDDSSVGLEDKEQGGEALSFDFASVGDAGESDEAEAEAEEYQEPPEDAKLFVGNLPYDIDSEGLAQLFQQAGVVEIAEVIYNRETDRSRGFGFVTMSTVEEAEKAVVLYNRYDLNGRLLTVNKAARRGSQPERPPRTFQPTYRIYVGNIPWDIDDARLEQVFSEHGKVVSARVVYDRESGRSRGFGFVTMSSEPEMSEAIANLDGQTLDGRTIRVNAAEERPRRNTF	0	46.925	0	21.9595	7	128	7	18.953	84.43	21.9595	7	34	56.93	21.9595	7	22	87.9	21.6216	6	30	79.36	21.9595	7	29	32.7	21.6216	6	13	1	1	1	1	1	5	WTSP	Detected by both ITAG and Atlas
Solyc03g111850	Indole-3-glycerol phosphate synthase-like (AHRD V1 **** C8TFG9_ORYSI); contains Interpro domain(s) IPR013798 Indole-3-glycerol phosphate synthase	AT5G48220	MDSVMPLRTTTAATATAASAAATVRPRFSFQLLANPRPRKPAFSLSVPTTIFTTHRARILPQFTPVRAQEDNSALVSESTIPEGDALKIKEWEVERFQDEIAASQGIKIRRRPTTGPPLHYVGPFEFRMQNEGNTPINILEEIIWYKDKEVSQMKEKKPLLLLKKLLSSVPPTRDFLGALRESYSRTGLPALIAEVKKASPSRGVLRENFNPVEIAKAYERGGAACLSVLTDQKYFQGSFENLEAIRNAGVECPLLCKEFVIEAWQIYYARVKGADAILLIAAVLPNLDIQYMIKICKLLGLTALVEVHDEREMDRVLGIDGVELIGINNRDLGTFKVDISNTKKLLEGERGERIREKGIIVVGESGLFTPADIGYVQEAGVKAVLVGESLVKQEDPAK…	0	53.922	0	27.0073	10	42	10	2.162	38.05	22.3844	8	12	29.56	25.3041	9	10	22.41	19.4647	7	8	23.58	17.7616	6	8	10.18	9.73236	4	4	1	1	1	1	1	5	WTSP	Detected by both ITAG and Atlas
[truncated: 1,432 more rows]

## Sheet: Table S1B. Gel Primary data
Table S1B: Proteomics data from gel-excised samples
																				Gel-excised sample #1				Gel-excised sample #2				Gel-excised sample #3
[truncated: 1,287 more rows]

## Sheet: Table S1C. Acetone Stromal
Table S1C: Stromal proteome derived from acetone-precipitated samples
Protein Attributes						Proteomics										MapMan & Mercator
[truncated: 1,252 more rows]

## Sheet: TableS1D. Gel Stromal
Table S1D: Stromal proteins detected from SDS-PAGE Gels
[truncated: 954 more rows]
