# Supplementary material for: The tomato chloroplast stromal proteome compendium elucidated by leveraging a plastid protein-localization prediction Atlas
Source: Front Plant Sci. 2023 Aug 28;14:1020275. doi: 10.3389/fpls.2023.1020275 (PMC10493611; doi:10.3389/fpls.2023.1020275)
Supplement: Supplementary file 4 [file Table_2.xlsx]

## Sheet: Table S2A. StromalProteome
Table S2A: Stromal proteome derived from acetone-precipitated and gel-excised samples
Protein Attributes						Proteomics						Samples			MapMan & Mercator			The Atlas: Protein localization predictions							Databases			Prediction of locations in lumen/thylakoid
Tomato accession	Description	Gene name	Arabidopsis homolog	NCBI Accession	Sequence	Peptides	PSMs	Protein Unique Peptides	emPAI	Mol%	Mol% rank	Acetone samples	Gel samples	Total	MapMan Primary Bincode	MapMan Bincode name	Mercator descriptor	TargetP	TargetP Reliability Class	ChloroP transit peptide	Predotar	WoLF PSORT	Yloc location	Yloc Confidence	PPDB location	SUBA4 Location	plprot	TargetP ver 2	Cp transit peptide probability	Thylakoid Transit Peptide Probability	Pred SL	Detection
544163593	Photosystem II protein D1 (chloroplast) [Solanum lycopersicum]	PSBA	Atcg00020	YP_008563068.1	MTAILERRESESLWGRFCNWITSTENRLYIGWFGVLMIPTLLTATSVFIIAFIAAPPVDIDGIREPVSGSLLYGNNIISGAIIPTSAAIGLHFYPIWEAASVDEWLYNGGPYELIVLHFLLGVACYMGREWELSFRLGMRPWIAVAYSAPVAAATAVFLIYPIGQGSFSDGMPLGISGTFNFMIVFQAEHNILMHPFHMLGVAGVFGGSLFSAMHGSLVTSSLIRETTENESANEGYRFGQEEETYNIVAAHGYFGRLIFQYASFNNSRSLHFFLAAWPVVGIWFTALGISTMAFNLNGFNFNQSVVDSQGRVINTWADIINRANLGMEVMHERNAHNFPLDLAAIEAPSTNG	2	3	2	0.668	0.00430761	914	2	2	4	1'	'Photosynthesis.photophosphorylation.photosystem II.PS-II complex.reaction center complex.component *(D1/PsbA)'	'mercator4v5.0: component *(PsbA/D1) of PS-II reaction center complex & swissprot: Photosystem II protein D1 & original description: photosystem II protein D1 (chloroplast) [Solanum lycopersicum]'	-	-	-	-	-	-	-	thylakoid-integral	plastid	-	-	-	-	No	Atlas only
544163595	Ribosomal protein S16 (chloroplast) [Solanum lycopersicum]	RPS16	Atcg00050	YP_008563070.1	MVKLRLKRCGRKQRAVYRIVAIDVRSRREGKDLQKVGFYDPIKNQTYLNVPAILYFLEKGAQPTETVQDILKKAEVFKELRLNQPKFN	5	14	5	30.623	0.197473	54	5	2	7	17'	'Protein biosynthesis.organelle machinery.plastidial ribosome biogenesis.small ribosomal subunit proteome.component *(bS16c)'	'mercator4v5.0: component *(bS16c) of small plastid ribosomal-subunit proteome & swissprot: 30S ribosomal protein S16, chloroplastic & original description: ribosomal protein S16 (chloroplast) [Solanum lycopersicum]'	-	-	-	-	-	-	-	plastid ribosome	-	-	-	-	-	No	Atlas only
544163598	ATP synthase CF1 alpha subunit (chloroplast) [Solanum lycopersicum]	ATPA	Atcg00120	YP_008563073.1	MVTIRADEISNIIRERIEQYNREVKIVNTGTVLQVGDGIARIHGLDEVMAGELVEFEEGTIGIALNLESNNVGVVLMGDGLLIQEGSSVKATGRIAQIPVSEAYLGRVVNALAKPIDGRGEISASEFRLIESAAPGIISRRSVYEPLQTGLIAIDSMIPIGRGQRELIIGDRQTGKTAVATDTILNQQGQNVICVYVAIGQKASSVAQVVTTLQERGAMEYTIVVAETADSPATLQYLAPYTGAALAEYFMYRERHTLIIYDDLSKQAQAYRQMSLLLRRPPGREAYPGDVFYLHSRLLERAAKLSSSLGEGSMTALPIVETQSGDVSAYIPTNVISITDGQIFLSADLFNSGIRPAINVGISVSRVGSAAQIKAMKQVAGKLKLELAQFAELEAFAQF…	22	673	22	78.433	0.505777	24	5	3	8	1'	'Photosynthesis.photophosphorylation.ATP synthase complex.peripheral CF1 subcomplex.subunit alpha'	'mercator4v5.0: subunit alpha of peripheral CF1 subcomplex of ATP synthase complex & swissprot: ATP synthase subunit alpha, chloroplastic & original description: ATP synthase CF1 alpha subunit (chloroplast) [Solanum lycopersicum]'	-	-	-	-	-	-	-	thylakoid-peripheral-stromal-side	plastid	-	-	-	-	No	Atlas only
544163599	ATP synthase CF0 subunit I (chloroplast) [Solanum lycopersicum]	ATPF	Atcg00130	YP_008563074.1	MKNVTDSFVSLGHWPSAGSFGFNTDILATNPINLSVVLGVLIFFGKGVLSDLLDNRKQRILNTIRNSEELRGGAIEQLEKARSRLRKVETEAEQFRVNGYSEIEREKLNLINSTYKTLEQLENYKNETIQFEQQRAINQVRQRVFQQALRGALGTLNSCLNNELHLRTISANIGMLGTMKEITD	4	11	4	1.424	0.00918269	709	5	2	7	1'	'Photosynthesis.photophosphorylation.ATP synthase complex.membrane CF0 subcomplex.subunit b'	'mercator4v5.0: subunit b of membrane CF0 subcomplex of ATP synthase complex & swissprot: ATP synthase subunit b, chloroplastic & original description: ATP synthase CF0 subunit I (chloroplast) [Solanum lycopersicum]'	-	-	-	-	-	-	-	thylakoid-integral	plastid	-	-	-	-	No	Atlas only
544163602	Ribosomal protein S2 (chloroplast) [Solanum lycopersicum]	RPS2	Atcg00160	YP_008563077.1	MTRRYWNINLEEMMEAGVHFGHGTRKWNPKMAPYISAKRKGIHITNLTRTARFLSEACDLVFDAASRGKQFLIVGTKNKAADSVEWAAIRARCHYVNKKWLGGMLTNWSTTETRLHKFRDLRMEQKTGRLNRLPKRDAAMLKRQLSRLQTYLGGIKYMTGVPDIVIIVDQHEEYTALRECITLGIPTICLTDTNCDPDLADISIPANDDAISSIRLILNKLVFAICEGRSSYIRNP	5	14	4	2.981	0.019223	460	5	2	7	17'	'Protein biosynthesis.organelle machinery.plastidial ribosome biogenesis.small ribosomal subunit proteome.component *(uS2c)'	'mercator4v5.0: component *(uS2c) of small plastid ribosomal-subunit proteome & swissprot: 30S ribosomal protein S2, chloroplastic & original description: ribosomal protein S2 (chloroplast) [Solanum lycopersicum]'	-	-	-	-	-	-	-	plastid ribosome	plastid	-	-	-	-	No	Atlas only
544163603	RNA polymerase beta' subunit (chloroplast) [Solanum lycopersicum]	RPOC2	Atcg00170	YP_008563078.1	MEVLMAERANLVFHNKAIDGTAMKRLISRLIEHFGMAYTSHILDQVKTLGFQQATATSISLGIDDLLTIPSKGWLVQDAEQQSLILEKHHQYGNVHAVEKLRQSIEIWYATSEYLRQEMNPNFRMTDPFNPVHIMSFSGARGNASQVHQLVGMRGLMSDPQGQMIDLPIQSNLREGLSLTEYIISCYGARKGVVDTAVRTSDAGYLTRRLVEVVQHIVVRRTDCGTARGISVSPRNGIMPERIFSQTLIGRVLADDIYMGSRCIATRNQAIGIGLVNRFITFRAQPISIRTPFTCRSTSWICRLCYGRSPTHGDLVELGEAVGIIAGQSIGEPGTQLTLRTFHTGGVFTGGTAEHVRAPSNGKIKFNEDLVHPTRTRHGHPAFLCSIDLYVTIESEDIL…	10	16	9	0.396	0.00255361	1023	4	0	4	15'	'RNA biosynthesis.organelle machinery.RNA polymerase activities.plastid-encoded RNA polymerase (PEP) complex.core components.core component *(RpoC2)'	'mercator4v5.0: core component *(RpoC2) of plastid-encoded RNA polymerase & swissprot: DNA-directed RNA polymerase subunit beta'' & original description: RNA polymerase beta' subunit (chloroplast) [Solanum lycopersicum]'	-	-	-	-	-	-	-	plastid nucleoid	plastid	-	-	-	-	No	Atlas only
544163604	RNA polymerase beta subunit (chloroplast) [Solanum lycopersicum]	RPOC1	Atcg00180	YP_008563079.1	MNNNFSSMIDRYKHQQLRIGSVSPQQISAWATKILPNGEIVGEVTKPYTFHYKTNKPEKDGLFCERIFGPIKSGICACGNYRVIGDEKEDPKFCEQCGVEFVDSRIRRYQMGYIKLACPVTHVWYLKRLPSYIANLLDKPLKELEGLVYCDFSFARPITKKPTFLRLRGLFEYEIQSWKYSIPLFFTTQGFDTFRNREISTGAGAIREQLADLDLRIIIENSLVEWEELGEEGHTGNEWEDRKVGRRKDFLVRRVELAKHFIRTNIEPEWMVLCLLPVLPPELRPIIQIDGGKLMSSDINELYRRVIYRNNTLTDLLTTSRSTPGELVMCQEKLVQEAVDTLLDNGIRGQPMRDGHNKVYKSFSDVIEGKEGRFRETLLGKRVDYSGRSVIVVGPSLSL…	6	6	6	0.425	0.00274062	1012	1	0	1	15'	'RNA biosynthesis.organelle machinery.RNA polymerase activities.plastid-encoded RNA polymerase (PEP) complex.core components.core component *(RpoC1)'	'mercator4v5.0: core component *(RpoC1) of plastid-encoded RNA polymerase & swissprot: DNA-directed RNA polymerase subunit beta' & original description: RNA polymerase beta subunit (chloroplast) [Solanum lycopersicum]'	-	-	-	-	-	-	-	plastid nucleoid	plastid	-	-	-	-	No	Atlas only
544163605	RNA polymerase beta subunit (chloroplast) [Solanum lycopersicum]	RPOB	Atcg00190	YP_008563080.1	MLGDGNEGISTIPGFNQIQFEGFCRFIDQGLTEELYKFPKIEDTDQEIEFQLFVETYQLVEPLIKERDAVYESLTYSSELYVSAGLIWKNSRDMQEQTIFIGNIPLMNSLGTSIVNGIYRIVINQILQSPGIYYRSELDHNGISVYTGTIISDWGGRSELEIDRKARIWARVSRKQKISILVLSSAMGLNLREILENVCYPEIFLSFLNDKERKKIGSKENSILEFYQQFACVGGDPVFSESLCKELQKKFFQQRCELGRIGRRNMNRKLNLDIPQNNTFLLPRDILAAADHLIGLKFGMGALDDMNHLKNKRIRSVADLLQDQFGLALVRLENVVRGTICGAIRHKLIPTPQNLVTSPPLTTTYESFFGLHPLSQVLDRTNPLTQIVHGRKLSYLGPG…	6	14	5	0.551	0.00355313	967	5	1	6	15'	'RNA biosynthesis.organelle machinery.RNA polymerase activities.plastid-encoded RNA polymerase (PEP) complex.core components.core component *(RpoB)'	'mercator4v5.0: core component *(RpoB) of plastid-encoded RNA polymerase & swissprot: DNA-directed RNA polymerase subunit beta & original description: RNA polymerase beta subunit (chloroplast) [Solanum lycopersicum]'	-	-	-	-	-	-	-	plastid nucleoid	plastid	-	-	-	-	No	Atlas only
544163608	Photosystem II protein D2 (chloroplast) [Solanum lycopersicum]	PSBD2	Atcg00270	YP_008563083.1	MTIAIGKFTKDENDLFDIMDDWLrRNADRFVFVGWSGLLLFPCAYFAVGGWFTGTTFVTSWYTHGLASSYLEGCNFLTAAVSTPANSLAHSLLLLWGPEAQGDFTRWCQLGGLWTFVALHGAFGLIGFMLRQFELARSVQLRPYNAIAFSGPIAVFVSVFLIYPLGQSGWFFAPSFGVAAIFRFILFFQGFHNWTLNPFHMMGVAGVLGAALLCAIHGATVENTLFEDGDGANTFRAFNPTQAEETYSMVTANRFWSQIFGVAFSNKRWLHFFMLFVPVTGLWMSALGVVGLALNLRAYDFVSQEIRAAEDPEFETFYTKNILLNEGIRAWMAAQDQPHENLIFPEEVLPRGNAL	1	1	0			1252	0	1	1	1.1.1.2	PS.light reactions	'mercator4v5.0: component *(PsbD/D2) of PS-II reaction center complex & original description: none'	-	-	-	-	-	-	-	thylakoid-integral	plastid	-	-	-	-	No	Atlas only
544163609	Photosystem II CP43 chlorophyll apoprotein (chloroplast) [Solanum lycopersicum]	PSBC	Atcg00280	YP_008563084.1	MKTLYSLRRFYHVETLFNGTLALAGRDQETTGFAWWAGNARLINLSGKLLGAHVAHAGLIVFWAGAMNLFEVAHFVPEKPMYEQGLILLPHLATLGWGVGPGGEVIDTFPYFVSGVLHLISSAVLGFGGIYHALLGPETLEESFPFFGYVWKDRNKMTTILGIHLILLGIGAFLLVFKALYFGGVYDTWAPGGGDVRKITNLTLSPSIIFGYLLKSPFGGEGWIVSVDDLEDIIGGHVWLGSICILGGIWHILTKPFAWARRALVWSGEAYLSYSLGALAVFGFIACCFVWFNNTAYPSEFYGPTGPEASQAQAFTFLVRDQRLGANVGSAQGPTGLGKYLMRSPTGEVIFGGETMRFWDLRAPWLEPLRGPNGLDLSRLKKDIQPWQERRSAEYMTHA…	1	1	1	0.212	0.00136709	1109	1	1	2	1'	'Photosynthesis.photophosphorylation.photosystem II.PS-II complex.reaction center complex.component *(CP43/PsbC)'	'mercator4v5.0: component *(PsbC/CP43) of PS-II reaction center complex & swissprot: Photosystem II CP43 reaction center protein & original description: photosystem II CP43 chlorophyll apoprotein (chloroplast) [Solanum lycopersicum]'	-	-	-	-	-	-	-	thylakoid-integral	plastid	-	-	-	-	No	Atlas only
544163611	Ribosomal protein S14 (chloroplast) [Solanum lycopersicum]	RPS14	Atcg00330	YP_008563086.1	MARKSLIQREKKRQKLEQKYHSIRRSSKKEISKVPSLSDKWEIYGKLQSLPRNSAPTRLHRRCFLTGRPRANYRDFGLSGHILREMVHACLLPGATRSSW	3	26	3	6.197	0.0399615	256	5	3	8	17'	'Protein biosynthesis.organelle machinery.plastidial ribosome biogenesis.small ribosomal subunit proteome.component *(uS14c)'	'mercator4v5.0: component *(uS14c) of small plastid ribosomal-subunit proteome & swissprot: 30S ribosomal protein S14, chloroplastic & original description: ribosomal protein S14 (chloroplast) [Solanum lycopersicum]'	-	-	-	-	-	-	-	plastid ribosome	plastid	-	-	-	-	No	Atlas only
544163612	Photosystem I P700 apoprotein A2 (chloroplast) [Solanum lycopersicum]	PSAB	Atcg00340	YP_008563087.1	MALRFPRFSQGLAQDPTTRRIWFGIATAHDFESHDDITEERLYQNIFASHFGQLAIIFLWTSGNLFHVAWQGNFESWVQDPLHVRPIAHAIWDPHFGQPAVEAFTRGGALGPVNIAYSGVYQWWYTIGLRTNEDLYTGALFLLFLSAISLIAGWLHLQPKWKPSVSWFKNAESRLNHHLSGLFGVSSLAWTGHLVHVAIPASRGEYVRWNNFLDVLPHPQGLGPLFTGQWNLYAQNPDSSSHLFGTAEGAGTAILTLLGGFHPQTQSLWLTDIAHHHLAIAFIFLVAGHMYRTNFGIGHSMKDLLDAHIPPGGRLGRGHKGLYDTINNSLHFQLGLALASLGVITSLVAQHMYSLPAYAFIAQDFTTQAALYTHHQYIAGFIMTGAFAHGAIFFIRDYN…	3	8	2	1.154	0.00744159	760	4	0	4	1'	'Photosynthesis.photophosphorylation.photosystem I.PS-I complex.apoprotein component *(PsaB)'	'mercator4v5.0: apoprotein PsaB of PS-I complex & swissprot: Photosystem I P700 chlorophyll a apoprotein A2 & original description: photosystem I P700 apoprotein A2 (chloroplast) [Solanum lycopersicum]'	-	-	-	-	-	-	-	thylakoid-integral	plastid	-	-	-	-	No	Atlas only
544163613	Photosystem I P700 apoprotein A1 (chloroplast) [Solanum lycopersicum]	PSAA	Atcg00350	YP_008563088.1	MIIRSPEPEVKILVDRDPVKTSFEEWARPGHFSRTIAKGPDTTTWIWNLHADAHDFDSHTSDLEEISRKVFSAHFGQLSIIFLWLSGMYFHGARFSNYEAWLSDPTHIGPSAQVVWPIVGQEILNGDVGGGFRGIQITSGFFQLWRASGITSELQLYCTAIGALVFAALMLFAGWFHYHKAAPKLAWFQDVESMLNHHLAGLLGLGSLSWAGHQVHVSLPINQFLNAGVDPKEIPLPHEFILNRDLLAQLYPSFAEGATPFFTLNWSKYADFLTFRGGLDPVTGGLWLTDIAHHHLAIAILFLIAGHMYRTNWGIGHGLKDILEAHKGPFTGQGHKGLYEILTTSWHAQLSLNLAMLGSLTIVVAHHMYSMPPYPYLATDYGTQLSLFTHHMWIGGFLI…	1	1	1	0.155	0.00099952	1159	1	0	1	1'	'Photosynthesis.photophosphorylation.photosystem I.PS-I complex.apoprotein component *(PsaA)'	'mercator4v5.0: apoprotein PsaA of PS-I complex & swissprot: Photosystem I P700 chlorophyll a apoprotein A1 & original description: photosystem I P700 apoprotein A1 (chloroplast) [Solanum lycopersicum]'	-	-	-	-	-	-	-	thylakoid-integral	plastid	-	-	-	-	No	Atlas only
544163614	Photosystem I assembly protein ycf3 (chloroplast) [Solanum lycopersicum]	YCF3	Atcg00360	YP_008563089.1	MPRSRINGNFIDKTFSIVADILLRVIPTTSGEKEAFTYYRDGMSAQSEGNYAEALQNYYEAMRLEIDPYDRSYILYNIGLIHTSNGEHTKALEYYFRALERNPFLPQAFNNMAVICHYRGEQAIQQGDSEIAEAWFDQAAEYWKQAIALTPGNYIEARNWLKITRRFE	3	18	3	1.683	0.0108529	652	5	2	7	1'	'Photosynthesis.photophosphorylation.photosystem I.assembly and maintenance.assembly factor *(YCF3)'	'mercator4v5.0: protein involved in PS-I assembly *(YCF3) & swissprot: Photosystem I assembly protein Ycf3 & original description: photosystem I assembly protein ycf3 (chloroplast) [Solanum lycopersicum]'	-	-	-	-	-	-	-	thylakoid-peripheral-stromal-side	plastid	-	-	-	-	No	Atlas only
544163615	Ribosomal protein S4 (chloroplast) [Solanum lycopersicum]	RPS4	Atcg00380	YP_008563090.1	MSRYRGPRFKKIRRLGALPGLTNKKPRTGSDLRNQSRSGKKSQYRIRLEEKQKLRFHYGLTERQLLKYVRIARKAKGSTGQVLLQLLEMRLDNILFRLGMASTIPAARQLVNHRHILVNGHIVDIPSYRCKPRDIITAKDEQKSRALIQISLDSSPHEELPNHLTLQPFQYKGLVNQIIDSKWVGLKINELLVVEYYSRQT	9	43	8	17.738	0.114384	97	5	3	8	17'	'Protein biosynthesis.organelle machinery.plastidial ribosome biogenesis.small ribosomal subunit proteome.component *(uS4c)'	'mercator4v5.0: component *(uS4c) of small plastid ribosomal-subunit proteome & swissprot: 30S ribosomal protein S4, chloroplastic & original description: ribosomal protein S4 (chloroplast) [Solanum lycopersicum]'	-	-	-	-	-	-	-	plastid ribosome	plastid	-	-	-	-	No	Atlas only
544163616	NADH-plastoquinone oxidoreductase subunit J (chloroplast) [Solanum lycopersicum]	NDHJ	Atcg00420	YP_008563091.1	MQGRLSAWLVKHGLIHRSLGFDYQGIETLQIKPEDWHSIAVIFYVYGYNYLRSQCAYDVAPGGLLASVYHLTRIEDGVAQPEELCIKVFASRRNPRIPSVFWVWKSVDFQERESYDMLGISYDNHPRLKRILMPESWIGWPLRKDYIAPNFYEIQDAH	6	20	6	6.499	0.0419089	244	5	3	8	1'	'Photosynthesis.photophosphorylation.chlororespiration.NADH dehydrogenase-like (NDH) complex.subcomplex A.component *(NdhJ)'	'mercator4v5.0: component *(NdhJ) of NDH subcomplex A & swissprot: NAD(P)H-quinone oxidoreductase subunit J, chloroplastic & original description: NADH-plastoquinone oxidoreductase subunit J (chloroplast) [Solanum lycopersicum]'	-	-	-	-	-	-	-	thylakoid	plastid	-	-	-	-	No	Atlas only
544163619	ATP synthase CF1 epsilon subunit (chloroplast) [Solanum lycopersicum]	ATPE	Atcg00470	YP_008563094.1	MTLNLSVLTPNRIVWDSEVEEIVLSTNSGQIGILPNHAPIATAVDIGILRIRLNDQWLTMALMGGFARIGNNEITVLVNDAEKGSDINPQEAQQTLEIAEANVKKAEGRRQKIEANLALRRARTRVEASNPIS	4	79	4	99	0.638403	21	5	3	8	1'	'Photosynthesis.photophosphorylation.ATP synthase complex.peripheral CF1 subcomplex.subunit epsilon'	'mercator4v5.0: subunit epsilon of peripheral CF1 subcomplex of ATP synthase complex & swissprot: ATP synthase epsilon chain, chloroplastic & original description: ATP synthase CF1 epsilon subunit (chloroplast) [Solanum lycopersicum]'	-	-	-	-	-	-	-	thylakoid-peripheral-stromal-side	plastid	-	-	-	-	No	Atlas only
544163620	ATP synthase CF1 beta subunit (chloroplast) [Solanum lycopersicum]	ATPB	Atcg00480	YP_008563095.1	MRINPTTSGSGVSTLEKKNPGRVVQIIGPVLDVAFPPGKMPNIYNALVVQGRDSVGQPINVACEVQQLLGNNRVRAVAMSATEGLTRGMAVIDTGAPISVPVGGATLGRIFNVLGEPVDNLGPVDTSTTSPIHRSAPAFIQLDTKLSIFETGIKVVDLLAPYRRGGKIGLFGGAGVGKTVLIMELINNIAKAHGGVSVFGGVGERTREGNDLYMEMKESGVINKENIAESKVALVYGQMNEPPGARMRVGLTALTMAEYFRDVNEQDVLLFIDNIFRFVQAGSEVSALLGRMPSAVGYQPTLSTEMGSLQERITSTKEGSITSIQAVYVPADDLTDPAPATTFAHLDATTVLSRGLAAKGIYPAVDPLDSTSTMLQPRIVGEEHYETAQRVKQTLQRYK…	30	1094	28	2153.43	13.8865	1	5	3	8	1'	'Photosynthesis.photophosphorylation.ATP synthase complex.peripheral CF1 subcomplex.subunit beta'	'mercator4v5.0: subunit beta of peripheral CF1 subcomplex of ATP synthase complex & swissprot: ATP synthase subunit beta, chloroplastic & original description: ATP synthase CF1 beta subunit (chloroplast) [Solanum lycopersicum]'	-	-	-	-	-	-	-	thylakoid-peripheral-stromal-side	plastid	-	-	-	-	No	Atlas only
544163621	Ribulose-1,5-bisphosphate carboxylase large chain (chloroplast) [Solanum lycopersicum]	RBCL	Atcg00490	YP_008563096.1	MSPQTETKASVGFKAGVKEYKLTYYTPEYQTKDTDILAAFRVTPQPGVPPEEAGAAVAAESSTGTWTTVWTDGLTSLDRYKGRCYRIERVVGEKDQYIAYVAYPLDLFEEGSVTNMFTSIVGNVFGFKALRALRLEDLRIPPAYVKTFQGPPHGIQVERDKLNKYGRPLLGCTIKPKLGLSAKNYGRAVYECLRGGLDFTKDDENVNSQPFMRWRDRFLFCAEALFKAQTETGEIKGHYLNATAGTCEEMIKRAVFARELGVPIVMHDYLTGGFTANTTLAHYCRDNGLLLHIHRAMHAVIDRQKNHGIHFRVLAKALRMSGGDHIHSGTVVGKLEGERDITLGFVDLLRDDFVEQDRSRGIYFTQDWVSLPGVLPVASGGIHVWHMPALTEIFGDDSV…	31	1339	27	1614.6	10.4118	2	5	3	8	1'	'Photosynthesis.calvin cycle.ribulose-1,5-bisphosphat carboxylase/oxygenase (RuBisCo) activity.RuBisCo heterodimer.large subunit'	'mercator4v5.0: large subunit of ribulose-1,5-bisphosphat carboxylase/oxygenase heterodimer & swissprot: Ribulose bisphosphate carboxylase large chain & original description: ribulose-1,5-bisphosphate carboxylase/oxygenase large subunit (chloroplast) [Solanum lycopersicum]'	-	-	-	-	-	-	-	plastid stroma	plastid	-	-	-	-	No	Atlas only
544163622	acetyl-CoA carboxylase carboxyltransferase beta subunit (chloroplast) [Solanum lycopersicum]	AccD	Atcg00500	YP_008563097.1	MTIHLLYFHANRGQENSMERWWFNSMLFKKEFERRCGLNKSMGSLGPIENTSEDPNLKVKNIHSCSNVDYLFGVKDIWNFISNDTFLVSDRNGDSYSIYFDIENHIFEVDNDHSFLSELESSFYSYRNSSYLNNGFRGEDPYYNSYMSYMYDTQYSWNNHINSCIDNYLQSQICIDTSIISGSESNGDSYIYRAICSGQSLNSSENEGSSRRTRTKDSDLTIRESSNDLEVTQKYKHLWVQCENCYGLNYKKFLKSKMNICEQCGYHLKMSSSDRIELLIDPGTWDPMDEDMVSLDPIEFHSEEEPYKDRIDSYQRKTGLTEAVQTGIGQLNGIPVAIGVMDFQFMGGSMGSVVGEKITRLIEHAANQNLPLMIVCASGGARMQEGSLSLMQMAKISSA…	11	33	11	3.642	0.0234855	393	5	2	7	5'	'Lipid metabolism.fatty acid metabolism.acetyl-CoA carboxylation.polymeric acetyl-CoA carboxylase complex.carboxyltransferase subunit beta'	'mercator4v5.0: carboxyltransferase subunit beta of polymeric acetyl-CoA carboxylase complex & swissprot: Acetyl-coenzyme A carboxylase carboxyl transferase subunit beta, chloroplastic & original description: acetyl-CoA carboxylase carboxyltransferase beta subunit (chloroplast) [Solanum lycopersicum]'	-	-	-	-	-	-	-	plastid stroma	plastid	-	-	-	-	No	Atlas only
544163626	cytochrome f (chloroplast) [Solanum lycopersicum]	PETA	Atcg00540	YP_008563101.1	MQTRNAFSWLKKQITRSISVSLMIYILTRTSISSAYPIFAQQGYENPREATGRIVCANCHLANKPVEIEVPQAVLPDTVFEAVVRIPYDMQLKQVLANGKKGGLNVGAVLILPEGFELAPPDRISPEMKEKIGNLSFQSYRPNKTNILVVGPVPGKKYSEITFPILSPDPATKKDVHFLKYPIYVGGNRGRGQIYPDGNKSNNTVYNATAAGIVSKIIRKEKGGYEITITDASEGRQVVDIIPPGPELLVSEGESIKFDQPLTSNPNVGGFGQGDAEIVLQDPLRVQGLLFFLASVILAQIFLVLKKKQFEKVQLAEMNF	8	24	4	3.394	0.0218863	425	5	3	8	1'	'Photosynthesis.photophosphorylation.cytochrome b6/f complex.apocytochrome f component *(PetA)'	'mercator4v5.0: apocytochrome f component *(PetA) of cytochrome b6/f complex & swissprot: Cytochrome f & original description: cytochrome f (chloroplast) [Solanum lycopersicum]'	-	-	-	-	-	-	-	thylakoid-integral	plastid	-	-	-	-	No	Atlas only
544163630	Photosystem II cytochrome b559 alpha subunit (chloroplast) [Solanum lycopersicum]	PSBE	Atcg00580	YP_008563105.1	MSGSTGERSFADIITSIRYWVIHSITIPSLFIAGWLFVSTGLAYDVFGSPRPNEYFTESRQGIPLITGRFDPLEQLDEFSRSF	1	1	1	<0.038	0	1247	1	0	1	1'	'Photosynthesis.photophosphorylation.photosystem II.PS-II complex.reaction center complex.cytochrome b559 heterodimer.component alpha *(PsbE)'	'mercator4v5.0: component alpha *(PsbE) of PS-II cytochrome b559 heterodimer & swissprot: Cytochrome b559 subunit alpha & original description: photosystem II cytochrome b559 alpha subunit (chloroplast) [Solanum lycopersicum]'	-	-	-	-	-	-	-	thylakoid-integral	plastid	-	-	-	-	No	Atlas only
544163634	Ribosomal protein L33 (chloroplast) [Solanum lycopersicum]	RPL33	Atcg00640	YP_008563109.1	MAKGKDVRVTVILECTSCVRNSVDKVSRGISRYITQKNRHNTPNRFELKKFCPYCYKHTIHGEIKK	1	1	1	0.778	0.00501695	863	1	0	1	17'	'Protein biosynthesis.organelle machinery.plastidial ribosome biogenesis.large ribosomal subunit proteome.component *(bL33c)'	'mercator4v5.0: component *(bL33c) of large plastid ribosomal-subunit proteome & original description: none'	-	-	-	-	not Cp	-	-	plastid ribosome	plastid	-	-	-	-	No	Atlas only
544163635	Ribosomal protein S18 (chloroplast) [Solanum lycopersicum]	RPS18	Atcg00650	YP_008563110.1	MDKSKRPFLKFKRSFRRRLPPIQSGDRIDYRNMSLISRFISEQGKILSRRVNRLTLKQQRLITLAIKQARILSLLPFLNNEKQFERTESTARTTGFKARNK	3	18	3	2.162	0.0139417	555	5	3	8	17'	'Protein biosynthesis.organelle machinery.plastidial ribosome biogenesis.small ribosomal subunit proteome.component *(bS18c)'	'mercator4v5.0: component *(bS18c) of small plastid ribosomal-subunit proteome & swissprot: 30S ribosomal protein S18, chloroplastic & original description: ribosomal protein S18 (chloroplast) [Solanum lycopersicum]'	-	-	-	-	-	-	-	plastid ribosome	plastid	-	-	-	-	No	Atlas only
544163636	Ribosomal protein L20 (chloroplast) [Solanum lycopersicum]	RPL20	Atcg00660	YP_008563111.1	MTRIKRGYIARRRRTKIRLFASSFRGAHSRLTRTITQQKIRALVSAHRDRDRKKRDFRRLWITRINAVIRERGVSYSYSRLIHDLYKRQLLLNRKILAQIAISNRNCLYMISNEIIKEVDWKESTRII	5	12	5	3.642	0.0234855	394	2	0	2	17'	'Protein biosynthesis.organelle machinery.plastidial ribosome biogenesis.large ribosomal subunit proteome.component *(bL20c)'	'mercator4v5.0: component *(bL20c) of large plastid ribosomal-subunit proteome & swissprot: 50S ribosomal protein L20, chloroplastic & original description: ribosomal protein L20 (chloroplast) [Solanum lycopersicum]'	-	-	-	M	Cp	-	-	plastid ribosome	plastid	-	-	-	-	No	Atlas only
544163637	Clp protease proteolytic subunit (chloroplast) [Solanum lycopersicum]	CLPP1	Atcg00670	YP_008563113.1 D'Andrea et al (2018)	MPIGVPRVVFRNPGDPISSWVDIYNRLYRERLLFLGQGIGTELSNQLIGLMLYLSMEDENKDLYLFVNSPGGWVIPGIAIYDTMQFVRPDIHTICLGLAASMGSFILAGGQLTKRIAFPHARVMIHEPYSGFYMAQVGEFVLEAIEMAKLRETLTRVYAEKTGQPVWVIHEDMERDIFMSATEAQAYGIVDFVAVQGKEHGFHADL	4	40	4	38.811	0.250273	44	5	3	8	19'	'Protein homeostasis.proteolysis.serine-type peptidase activities.chloroplast Clp-type protease complex.proteolytic core component *(ClpP1/3-6)'	'mercator4v5.0: proteolytic core component *(ClpP1/3-6) of chloroplast Clp-type protease complex & swissprot: ATP-dependent Clp protease proteolytic subunit & original description: clp protease proteolytic subunit (chloroplast) [Solanum lycopersicum]'	-	-	-	-	-	-	-	plastid stroma	plastid	-	-	-	-	No	Atlas only
544163638	Photosystem II CP47 chlorophyll apoprotein (chloroplast) [Solanum lycopersicum]	PSBB	Atcg00680	YP_008563114.1	MGLPWYRVHTVVLNDPGRLLSVHIMHTALVAGWAGSMALYELAVFDPSDPVLDPMWRQGMFVIPFMTRLGITNSWGGWSITGGTVTNPGIWSYEGVAGAHIVFSGLCFLAAIWHWVYWDLEIFCDERTGKPSLDLPKIFGIHLFLSGVACFGFGAFHVTGLYGPGIWVSDPYGLTGKVQPVNPAWGVEGFDPFVPGGIASHHIAAGTLGILAGLFHLSVRPPQRLYKGLRMGNIETVLSSSIAAVFFAAFVVAGTMWYGSATTPIELFGPTRYQWDQGYFQQEIYRRVSAGLAENQSLSEAWSKIPEKLAFYDYIGNNPAKGGLFRAGSMDNGDGIAVGWLGHPIFRDKEGRELFVRRMPTFFETFPVVLVDGDGIVRADVPFRRAESKYSVEQVGVTV…	2	3	2	0.52	0.00335323	974	2	1	3	1'	'Photosynthesis.photophosphorylation.photosystem II.PS-II complex.reaction center complex.component *(CP47/PsbB)'	'mercator4v5.0: component *(PsbB/CP47) of PS-II reaction center complex & swissprot: Photosystem II CP47 reaction center protein & original description: photosystem II CP47 chlorophyll apoprotein (chloroplast) [Solanum lycopersicum]'	-	-	-	-	-	-	-	thylakoid-integral	plastid	-	-	-	-	No	Atlas only
544163642	cytochrome b6 (chloroplast) [Solanum lycopersicum]	PETB	Atcg00720	YP_008563118.1	MSKVYDWFEERLEIQAIADDITSKYVPPHVNIFYCLGGITLTCFLVQVATGFAMTFYYRPTVTEAFASVQYIMTEANFGWLIRSVHRWSASMMVLMMILHVFRVYLTGGFKKPRELTWVTGVVLAVLTASFGVTGYSLPWDQIGYWAVKIVTGVPDAIPVIGSPLVELLRGSASVGQSTLTRFYSLHTFVLPLLTAVFMLMHFPMIRKQGISGPL	1	2	1	0.468	0.00301791	988	1	0	1	1'	'Photosynthesis.photophosphorylation.cytochrome b6/f complex.apocytochrome b component *(PetB)'	'mercator4v5.0: apocytochrome b component *(PetB) of cytochrome b6/f complex & swissprot: Cytochrome b6 & original description: cytochrome b6 (chloroplast) [Solanum lycopersicum]'	-	-	-	-	-	-	-	thylakoid-integral	plastid	-	-	-	-	No	Atlas only
544163644	RNA polymerase alpha subunit (chloroplast) [Solanum lycopersicum]	RPOA	Atcg00740	YP_008563120.1	MVREKVTVSTRTLQWKCVESRTDSKRLYYGRFILSPLMKGQADTIGIAMRRALLGEIEGTCITRVKSEKVPHEYSTITGIQESVHEILMNLKEIVLRSNLYGTSEASICVKGPGYVTAQDIILPPYVEIVDNTQHIASLTEPIDFCIGLQIERNRGYLIKTPHNFQDGSYPIDAVFMPVRNANHSIHSYGNGNEKQEILFIEIWTNGSLTPKEALHDASRNLIDLFIPFLHMEEDNLYLQDNQHTVPLSPFTFHDKLAKLIKNKKKIALKSIFIDQSELSSRIYNCLKMSNIYTLLDLLNNSQEDLMKIEHFRSEDIKQILDILEKYFVIDLAKNKF	4	6	4	1.154	0.00744159	761	4	1	5	15'	'RNA biosynthesis.organelle machinery.RNA polymerase activities.plastid-encoded RNA polymerase (PEP) complex.core components.core component *(RpoA)'	'mercator4v5.0: core component *(RpoA) of plastid-encoded RNA polymerase & swissprot: DNA-directed RNA polymerase subunit alpha & original description: RNA polymerase alpha subunit (chloroplast) [Solanum lycopersicum]'	-	-	-	-	-	-	-	plastid nucleoid	plastid	-	-	-	-	No	Atlas only
544163648	Ribosomal protein S8 (chloroplast) [Solanum lycopersicum]	RPS8	Atcg00770	YP_008563124.1	MGRDTIAEIITSIRNADMDRKRVVRIASTNITENIVQILLREGFIENVRKHRENNKYFLVLTLRHRRNRKRPYRNILNLKRISRPGLRIYSNYQRIPRILGGMGIVILSTSRGIMTDREARLEGIGGEILCYIW	6	31	6	4.337	0.0279672	351	5	3	8	17'	'Protein biosynthesis.organelle machinery.plastidial ribosome biogenesis.small ribosomal subunit proteome.component *(uS8c)'	'mercator4v5.0: component *(uS8c) of small plastid ribosomal-subunit proteome & swissprot: 30S ribosomal protein S8, chloroplastic & original description: ribosomal protein S8 (chloroplast) [Solanum lycopersicum]'	-	-	-	-	-	-	-	plastid ribosome	plastid	-	-	-	-	No	Atlas only
544163649	Ribosomal protein L14 (chloroplast) [Solanum lycopersicum]	RPL14	Atcg00780	YP_008563125.1	MIQPQTHLNVADNSGARELMCIRIIGASNRRYAHIGDVIVAVIKEAVPNMPLERSEVVRAVIVRTCKELKRDNGMIIRYDDNAAVVIDQEGNPKGTRIFGAIARELRELNFTKIVSLAPEVL	7	40	7	14.849	0.0957541	111	5	3	8	17'	'Protein biosynthesis.organelle machinery.plastidial ribosome biogenesis.large ribosomal subunit proteome.component *(uL14c)'	'mercator4v5.0: component *(uL14c) of large plastid ribosomal-subunit proteome & swissprot: 50S ribosomal protein L14, chloroplastic & original description: ribosomal protein L14 (chloroplast) [Solanum lycopersicum]'	-	-	-	-	-	-	-	plastid ribosome	plastid	-	-	-	-	No	Atlas only
544163650	Ribosomal protein L16 (chloroplast) [Solanum lycopersicum]	RPL16	Atcg00790	YP_008563126.1	MLSPKRTRFRKQHRGRMKGISYRGNRISFGKYALQALEPAWITSRQIEAGRRAMTRNARRGGKIWVRIFPDKPVTLRPAETRMGSGKGSPEYWVAVVKPGRILYEMGGVTENIARRAISLAASKMPIRTQFIIS	4	18	4	9	0.0580367	159	3	0	3	17'	'Protein biosynthesis.organelle machinery.plastidial ribosome biogenesis.large ribosomal subunit proteome.component *(uL16c)'	'mercator4v5.0: component *(uL16c) of large plastid ribosomal-subunit proteome & swissprot: 50S ribosomal protein L16, chloroplastic & original description: ribosomal protein L16 (chloroplast) [Solanum lycopersicum]'	-	-	-	-	-	-	-	plastid ribosome	plastid	-	-	-	-	No	Atlas only
544163651	Ribosomal protein S3 (chloroplast) [Solanum lycopersicum]	RPS3	Atcg00800	YP_008563127.1	MGQKINPLGFRLGTTQSHHSLWFSQPKNYSEGLQEDKKIRDCIKNYVQKNMRTSSGIEGIARIEIQKRIDLIQVIIFMGFPKLLIESRPRGIEELQMTLQKEFNCVNRKLNIAVTRIAKPYGNPNILAEFIAGQLKNRVSFRKAMKKAIELTEQADTKGIQIQIAGRIDGKEIARVEWIREGRVPLQTIRAKIDYCSYTVRTIYGILGIKIWIFLDEE	13	61	13	14.849	0.0957541	112	5	3	8	17'	'Protein biosynthesis.organelle machinery.plastidial ribosome biogenesis.small ribosomal subunit proteome.component *(uS3c)'	'mercator4v5.0: component *(uS3c) of small plastid ribosomal-subunit proteome & swissprot: 30S ribosomal protein S3, chloroplastic & original description: ribosomal protein S3 (chloroplast) [Solanum lycopersicum]'	-	-	-	-	-	-	-	plastid ribosome	plastid	-	-	-	-	No	Atlas only
544163652	Ribosomal protein L22 (chloroplast) [Solanum lycopersicum]	RPL22	Atcg00810	YP_008563128.1	MLKKKKTEVYALGEHISMSADKARRVIDQIRGRSYEETLMILELMPYRACYPILKLVYSAAANASYNMGSSETNLVISKAEVNEGTTVKKLKPRARGRSFPIKRSTCHITIVMKDISLDDEYGEMSSLKKTRWKKKSTAMTYRDMYNSGGLWDKK	3	7	3	4.995	0.0322103	322	1	0	1	17'	'Protein biosynthesis.organelle machinery.plastidial ribosome biogenesis.large ribosomal subunit proteome.component *(uL22c)'	'mercator4v5.0: component *(uL22c) of large plastid ribosomal-subunit proteome & swissprot: 50S ribosomal protein L22, chloroplastic & original description: ribosomal protein L22 (chloroplast) [Solanum lycopersicum]'	-	-	-	-	-	-	-	plastid ribosome	plastid	-	-	-	-	No	Atlas only
544163653	Ribosomal protein S19 (chloroplast) [Solanum lycopersicum]	RPS19	Atcg00820	YP_008563129.1	MTRSLKKNPFVANHLLKKIDKLNTKAEKEIIVTWSRASTIIPTMIGHTIAIHNGKEHLPIYITDSMVGHKLGEFAPTLNFRGHAKSDNRSRR	6	56	6	999	6.44207	3	5	3	8	17'	'Protein biosynthesis.organelle machinery.plastidial ribosome biogenesis.small ribosomal subunit proteome.component *(uS19c)'	'mercator4v5.0: component *(uS19c) of small plastid ribosomal-subunit proteome & swissprot: 30S ribosomal protein S19, chloroplastic & original description: ribosomal protein S19 (chloroplast) [Solanum lycopersicum]'	-	-	-	-	-	-	-	plastid ribosome	plastid	-	-	-	-	No	Atlas only
544163654	Ribosomal protein L2 (chloroplast) [Solanum lycopersicum]	RPL2	Atcg01310	YP_008563130.1	MAIHLYKTSTPSTRNGTVDSQVKSNPRNNLIYGQRRCGKGRNARGIITARHRGGGHKRLYRKIDFRRNEKDIYGRIVTIEYDPNRNAYICLIHYGDGEKRYILHPRGAIIGDTIVSGTEVPIKMGNALPLTDMPLGTAIHNIEITLGKGGQLARAAGAVAKLIAKEGKSATLKLPSGEVRLISKNCSATVGQVGNVGVNQKSLGRAGSKRWLGKRPVVRGVVMNPVDHPHGGGEGRAPIGRKKPTTPWGYPALGRRSRKRNKYSDNLILRRRSK	7	40	6	5.494	0.0354282	296	5	0	5	17'	'Protein biosynthesis.organelle machinery.plastidial ribosome biogenesis.large ribosomal subunit proteome.component *(uL2c)'	'mercator4v5.0: component *(uL2c) of large plastid ribosomal-subunit proteome & swissprot: 50S ribosomal protein L2, chloroplastic & original description: ribosomal protein L2 (chloroplast) [Solanum lycopersicum]'	-	-	-	-	-	-	-	plastid ribosome	plastid	-	-	-	-	No	Atlas only
544163660	Ribosomal protein S12 (chloroplast) [Solanum lycopersicum]	RPS12	Atcg00905	YP_008563067.1	MPTIKQLIRNTRQPIRNVTKSPALRGCPQRRGTCTRVYTITPKKPNSALRKVARVRLTSGFEITAYIPGIGHNSQEHSVVLVRGGRVKDLPGVRYHIVRGTLDAVGVKDRQQGRSKYGVKKPK	1	1	1	0.778	0.00501695	864	1	0	1	17'	'Protein biosynthesis.organelle machinery.plastidial ribosome biogenesis.small ribosomal subunit proteome.component *(uS12c)'	'mercator4v5.0: component *(uS12c) of small plastid ribosomal-subunit proteome & swissprot: 30S ribosomal protein S12, chloroplastic & original description: ribosomal protein S12 (chloroplast) [Solanum lycopersicum]'	-	-	-	-	-	-	-	plastid ribosome	plastid	-	-	-	-	No	Atlas only
544163662	Ribosomal protein L32 (chloroplast) [Solanum lycopersicum]	RPL32	AtCg01020	YP_008563137.1	MAVPKKRTSTSKKRIRKNIWKRKGYWVALKAFSLAKSLSTGNSKSFFVRQTKINK	1	3	1	1.154	0.00744159	762	1	0	1	17'	'Protein biosynthesis.organelle machinery.plastidial ribosome biogenesis.large ribosomal subunit proteome.component *(bL32c)'	'mercator4v5.0: component *(bL32c) of large plastid ribosomal-subunit proteome & original description: ribosomal protein L32 (chloroplast) [Solanum lycopersicum]'	-	-	-	-	-	Cp	2	plastid ribosome	plastid	-	-	-	-	No	Atlas only
544163665	Photosystem I subunit VII (chloroplast) [Solanum lycopersicum]	PSAC	Atcg01060	YP_008563140.1	MSHSVKIYDTCIGCTQCVRACPTDVLEMIPWDGCKAKQIASAPRTEDCVGCKRCESACPTDFLSVRVYLWHETTRSMGLAY	1	10	1	0.778	0.00501695	865	5	3	8	1'	Photosynthesis.photophosphorylation.photosystem I.PS-I complex.component *(PsaC)'	'mercator4v5.0: component *(PsaC) of PS-I complex & swissprot: Photosystem I iron-sulfur center & original description: photosystem I subunit VII (chloroplast) [Solanum lycopersicum]'	-	-	-	possibly ER	Cp	-	-	thylakoid-peripheral-stromal-side	plastid	-	-	-	-	No	Atlas only
544163668	NADH-plastoquinone oxidoreductase subunit I (chloroplast) [Solanum lycopersicum]	NDHI	Atcg01090	YP_008563143.1	MLPMITEFINYGQQTIRAARYIGQGFMITLSHANRLPVTIQYPYEKLITSERFRGRIHFEFDKCIACEVCVRVCPIDLPVVDWKLETDIRKKRLLNYSIDFGICIFCGNCVEYCPTNCLSMTEEYELSTYDRHELNYNQIALGRLPMSVIDDYTIRTISNLPQINNE	4	20	3	2.162	0.0139417	556	5	2	7	1'	'Photosynthesis.photophosphorylation.chlororespiration.NADH dehydrogenase-like (NDH) complex.subcomplex A.component *(NdhI)'	'mercator4v5.0: component *(NdhI) of NDH subcomplex A & swissprot: NAD(P)H-quinone oxidoreductase subunit I, chloroplastic & original description: NADH-plastoquinone oxidoreductase subunit I (chloroplast) [Solanum lycopersicum]'	-	-	-	-	-	-	-	thylakoid-peripheral-stromal-side	plastid	-	-	-	-	No	Atlas only
544163670	NADH-plastoquinone oxidoreductase subunit 7 (chloroplast) [Solanum lycopersicum]	NDHH	Atcg01110	YP_008563145.1	MTAPTTRKDLMIVNMGPQHPSMHGVLRLIVTLDGEDVVDCEPILGYLHRGMEKIAENRTIIQYLPYVTRWDYLATMFTEAITINGPEQLGNIQVPKRASYIRVIMLELSRIASHLLWLGPFMADIGAQTPFFYIFRERELIYDLFEAATGMRMMHNYFRIGGVAADLPYGWIDKCLDFCDYFLTGVAEYQKLITRNPIFLERVEGVGIIGRDEALNWGLSGPMLRASGIEWDLRKVDHYESYDEFDWQVQWQREGDSLARYLVRIGEMTESIKIIQQALEGIPGGPYENLEMRRFDRLKDPEWNDFEYRFISKKPSPTFELSKQELYVRVEAPKGELGIFLIGDQSVFPWRWKIRPPGFINLQILPQLVKRMKLADIMTILGSIDIIMGEVDR	11	47	11	9	0.0580367	160	5	3	8	1'	'Photosynthesis.photophosphorylation.chlororespiration.NADH dehydrogenase-like (NDH) complex.subcomplex A.component *(NdhH)'	'mercator4v5.0: component *(NdhH) of NDH subcomplex A & swissprot: NAD(P)H-quinone oxidoreductase subunit H, chloroplastic & original description: NADH-plastoquinone oxidoreductase subunit 7 (chloroplast) [Solanum lycopersicum]'	-	-	-	-	-	-	-	thylakoid	plastid	-	-	-	-	No	Atlas only
544163671	Ribosomal protein S15 (chloroplast) [Solanum lycopersicum]	RPS15	Atcg01120	YP_008563146.1	MVKNSVISVISQEEKKGSVEFQVFNFTNKIRRLTSHLELHKKDYLSQRGLKKILGKRQRLLAYLAKKNRVRYKELINRLDIRETKTR	10	26	10	629.957	4.06229	5	5	0	5	17'	'Protein biosynthesis.organelle machinery.plastidial ribosome biogenesis.small ribosomal subunit proteome.component *(uS15c)'	'mercator4v5.0: component *(uS15c) of small plastid ribosomal-subunit proteome & swissprot: 30S ribosomal protein S15, chloroplastic & original description: ribosomal protein S15 (chloroplast) [Solanum lycopersicum]'	-	-	-	-	-	-	-	plastid ribosome	plastid	-	-	-	-	No	Atlas only
544163674	Ribosomal protein S7 (chloroplast) [Solanum lycopersicum]	RPS7	Atcg00900	YP_008563135.1	MSRRGTAEKKTAKSDPIYRNRLVNMLVNRILKHGKKSLAYQIIYRAVKKIQQKTETNPLSVLRQAIRGVTPDITVKARRVGGSTHQVPIEIGSTQGKALAIRWLLAASRKRPGRNMAFKLSSELVDAAKGSGDAIRKKEETHRMAEANRAFAHFR	8	32	7	9	0.0580367	161	5	3	8	17'	'Protein biosynthesis.organelle machinery.plastidial ribosome biogenesis.small ribosomal subunit proteome.component *(uS7c)'	'mercator4v5.0: component *(uS7c) of small plastid ribosomal-subunit proteome & swissprot: 30S ribosomal protein S7, chloroplastic & original description: ribosomal protein S7 (chloroplast) [Solanum lycopersicum]'	-	-	-	-	-	-	-	plastid ribosome	plastid	-	-	-	-	No	Atlas only
544163678	Ribosomal protein L23 (chloroplast) [Solanum lycopersicum]	RPL23	Atcg01300	YP_008563131.1	MDGIKYAVFTDKSIRLLGKNQYTSNVESGSTRTEIKHWVELFFGVKVIAMNSHRLPGKSRRMGPIMGHTMHYRRMIITLQPGYSIPPLRKKRT	5	19	5	145.78	0.940065	16	2	0	2	17'	'Protein biosynthesis.organelle machinery.plastidial ribosome biogenesis.large ribosomal subunit proteome.component *(uL23c)'	'mercator4v5.0: component *(uL23c) of large plastid ribosomal-subunit proteome & swissprot: 50S ribosomal protein L23, chloroplastic & original description: ribosomal protein L23 (chloroplast) [Solanum lycopersicum]'	-	-	-	-	-	-	-	plastid ribosome	plastid	-	-	-	-	No	Detected by both ITAG and Atlas
Solyc01g005240	Aspartokinase 2 (AHRD V1 ***- B9RGY9_RICCO); contains Interpro domain(s) IPR001341 Aspartate kinase region	AK2	At5g14060	XP_004228743.1	MATLSHFSGVKTPCPSIFKRSVHFPQLDFVATVPFVSAPSKSVKVSCCERVQRLVCKAQATDVNRKETKNESFGEAPDELTCVMKFGGSSVASAERMREVADLILSFPEERPVIVLSAMGKTTNNLLLAGEKAQSCGVSNVSDLQELAFIKELHLRTIDELGVESSTISKHLLELEQLLNGIALMKELTPRAKDYLVSFGECMSTRIFSAYLNKLGVKARQYDAFEMGIITTDDFTNADILEATYPAVAKRLTGDWMSNPAIPIVTGFLGKGWRTCAVTTLGRGGSDLTATTIGKALGLREIQVWKDVDGVLTCDPNIYPRAETVPYLTFDEAAELAYFGAQVLHPQSMRPAREGDIPVRVKNSYNPKAPGTLIVKTRDMSKAVLTSIVLKRNVTMLDI…	10	26	10	1.555	0.0100274	684	5	2	7	'4.2.2.1'	'Amino acid metabolism.aspartate group amino acid biosynthesis.aspartate-derived amino acids.aspartate kinase'	'mercator4v5.0: aspartate kinase & swissprot: Aspartokinase 2, chloroplastic & original description: Aspartokinase (AHRD V1 ***- B9RGY9_RICCO); contains Interpro domain(s) IPR001341 Aspartate kinase region'	Cp	3	Cp	Cp	Cp	Cp	99.5	stroma	plastid	-	Cp	0.99	0.01	No	Detected by both ITAG and Atlas
Solyc01g005250	Aspartate-semialdehyde dehydrogenase (AHRD V1 ***- B6TWW1_MAIZE); contains Interpro domain(s) IPR005986 Aspartate-semialdehyde dehydrogenase, bacterial	-	At1g14810	XP_004228744.1	MNTPALSLRHNHFLNGSSALVSGIRLPRSSSSPFRVRMSLQENGPSVAVVGVTGAVGQEFLSVLSDRNFPYRSLKLLASKRSAGKSMKFEERDYTVEELTEDSFDGIDIALFSAGGSISKKFGPLAAQKGTIVVDNSSAFRMDENVPLVIPEVNPEAMAHVKLGSGKGALIANPNCSTIICLMAVTPLHRRAKVKRMVVSTYQAASGAGAAAMEELVQQTREVLEGKEPTCNIFNQQYAFNLFSHNAPVQPNGYNEEEMKLVKETRKIWSDKDVKVTATCIRVPVMRAHAESVNLQFENPLDENTARDILKNAPGIVVVDDRASNRFPTPLEVSNKDDVAVGRVRRDVSQDGDYGLDIFVCGDQIRKGAALNAIQIAEMLL	7	36	7	7.111	0.0458554	230	5	3	8	'4.2.2.2'	'Amino acid metabolism.aspartate group amino acid biosynthesis.aspartate-derived amino acids.aspartate-semialdehyde dehydrogenase'	'mercator4v5.0: aspartate-semialdehyde dehydrogenase & original description: Aspartate-semialdehyde dehydrogenase (AHRD V1 ***- B6TWW1_MAIZE); contains Interpro domain(s) IPR005986 Aspartate-semialdehyde dehydrogenase, bacterial'	Cp	3	Cp	possibly M	Cp	Cp	100	plastid stroma	plastid	-	M	0.35	0	No	Detected by both ITAG and Atlas
Solyc01g005380	SET domain containing protein (AHRD V1 ***- B6U0H4_MAIZE); contains Interpro domain(s) IPR001214 SET	-	At1g24610	XP_004228642.1	MSSKMMLMANSLTHVRPLTCAAAAVYPSRLVAQPPDLIKWVKTEGGFVHKSIKVAQGDTFGLGLVASEDIPKGSDLIALPQHIPLKFDGSTSESENSHSALIKLAQHVPEELWAMKLGLKLLQERARKGSFWWPYISNLPETYSVPIFFPGEDIKNLQYAPLLYQVNKRCRFLLDFEKILKHELENLKPDDHPFSGQDVDSSALGWAMSAVSSRAFRLYGGKRPDGTRSNVPMMLPLIDMCNHSFDPNAEIVQEEANTNRNMLVKMVAGREIKQNDPLLLNYGCLSSDLFLLDYGFVIPSNPYDCIELKYDAALLDAASMAAGFTSPNFSSPSPWQQQILSHLNLDGPNSDLKVTLGGGELVEGRLLAALRVVLSNDEEAVKQHDLETLKSLTVEAPLG…	11	33	11	5.661	0.0365051	289	5	3	8	'18.10.1.1'	'Protein modification.methylation.lysine N-methyltransferase activities.SETD-type lysine N-methyltransferase'	'mercator4v5.0: SETD-type lysine N-methyltransferase & original description: SET domain containing protein (AHRD V1 ***- B6U0H4_MAIZE); contains Interpro domain(s) IPR001214 SET'	S	5	-	possibly Cp	Cp	M	69.4	-	-	-	M	0.19	0	No	Detected by both ITAG and Atlas
Solyc01g005520	Met1, chloroplastic; Tetratricopeptide TPR_2 repeat protein (AHRD V1 *--- A8ZVN6_DESOH); contains Interpro domain(s) IPR001478 PDZ/NADHR/GLGF	MET1	At1g55480	XP_004228646.1	MASTISYTSLCSLLKLNQTNQKTPFSPSLSSPSSPSSLVKIKNQLCFSSNFCSHLNKASIFMVKASETEATQSEKEEEDKYEEYEVEIIQPYGLKFTKGRDGGTYIDAIAPGGFADKTGKFAVGDKVIATSAVFGEEIWPAAEYGRTMYTIRQRIGPLLMKMQKRYGKVEEVGELTEKEIIRAERNAGFISDRVREIQVTNARRKKEQKEQRERELREGLKLSKNGKYEEALEKFESVLGSRPTGDELAVASYNVACCYSKLNQLQAGLSALKDAMEAGFEDFKRIRTDPDLANLRTSEDFETLMKKFDESFINENAINAIKSLFGFNKK	17	79	17	16.302	0.105124	104	5	3	8	'1.1.1.4.7'	'Photosynthesis.photophosphorylation.photosystem II.repair and reassembly cycle.assembly factor *(MET1)'	'mercator4v5.0: protein involved in PS-II assembly *(MET1) & swissprot: Protein MET1, chloroplastic & original description: Tetratricopeptide TPR_2 repeat protein (AHRD V1 *--- A8ZVN6_DESOH); contains Interpro domain(s) IPR001478 PDZ/DHR/GLGF'	Cp	1	Cp	Cp	Cp	C	86.4	thylakoid-peripheral-stromal-side	plastid	plp_at_00107; plp_at_01331; plp_at_01734	Cp	1	0	No	Detected by both ITAG and Atlas
Solyc01g005540	Lysyl-tRNA synthetase (AHRD V1 ***- B9SBP3_RICCO); contains Interpro domain(s) IPR002313 Lysyl-tRNA synthetase, class II	LysRS	At3g13490	XP_004228608.1	MEALQPLKQLIHFTSLRFRPSSSSFFIVRCCSSTTTEVTGRAAGGGRNRRSSSGTSTSTSDKEAIRAIRIKKVEELRSNGLEPYAYKWDRTHSASQLQEIYKNLGNGEESKSENDYVSISGRIVARRAFGKLAFLTLRDDSGMIQLYCEKERLLSDQFDQLKTLVDIGDILGANGSIKRTEKGELSVCVNSFSILTKSLLPLPDKYHGLTDIDKRYRQRYVDMIANPEVADTFRKRAKIVSEIRQSVESFGFLEVETPVLQGAAGGAEARPFITFHNSLGRDLYLRIATELHLKRMLVGGFEKVYEIGRIFRNEGISTRHNPEFTTIEMYEAYSDYESMMNMAEEIVTRCALAVNGKLKIDYQGVEICLERPWRRETMHNLVKEATGIDFKNFEDDLKA…	11	33	11	1.297	0.00836373	743	5	3	8	'17.2.13'	'Protein biosynthesis.aminoacyl-tRNA synthetase activities.lysine-tRNA ligase'	'mercator4v5.0: lysine-tRNA ligase & swissprot: Lysine--tRNA ligase, chloroplastic/mitochondrial & original description: Lysyl-tRNA synthetase (AHRD V1 ***- B9SBP3_RICCO); contains Interpro domain(s) IPR002313 Lysyl-tRNA synthetase, class II'	Cp	3	Cp	possibly Cp	Cp	M	98.4	plastid stroma; mitochondria	mitochondrion,plastid	-	M	0.25	0.02	No	Detected by both ITAG and Atlas
Solyc01g006020	Uncharacterized protein	-	At3g32930	XP_004228682.1	MILQTTINSFTFSSQPISRNSLFFKNLTFFTSPLLPKSFLPSLDYRFYLGNKRSSLSVSSAKTGSKTIHATLLEAPVLWAGRVCVFYALLKAGLAGSPSNPLVSDLENDGNAELGFAKWFEELQSKPEKEATNRRKLVSKWHPTTKGTLRRNYRVPSKPEGKRLLKSIASLLSDDDHFRDATSHKGCQIRRESAHGESVCCNNVRALFDELPTPHLIVEITPFPAGPLTDTDYAKAEKLERVLRSGPSV	2	6	2	0.425	0.00274062	1013	5	2	7	'35.2'	'not assigned.not annotated'	'mercator4v5.0: not classified & original description: At3g32930-like protein (Fragment) (AHRD V1 *-*- B3SKU7_ARAHA)'	Cp	2	Cp	Cp	Cp	Cp	63.2	-	plastid	-	Cp	0.75	0.23	No	ITAG only
Solyc01g006130	Homology to unknown gene (AHRD V1 *-*- Q010T6_OSTTA); contains Interpro domain(s) IPR001305 Heat shock protein DnaJ, cysteine-rich region	EDA3	At2g34860	XP_004228692.1	MASHLSFSTPSALWGSYLNPKSSSLSQLNMKKRVGSHVNCSSEDESCTSASSEHLREHVEEKRSQTSVSRRWCLTCLCSTGALITASGNPISEPRAIALDGNESPGCRNCGGSGAIICDMCGGTGKWKALNRKRAKDVYEFTECPNCYGRGKLVCPVCLGTGLPNNKGLLRRPDARKLLDKMYNGRLLLKAVLHQKDNEKRLKVTMDVTTIVLLSVPVKSLDELSFSP	2	2	2			1253	0	1	1	'1.1.4.3.7'	'Photosynthesis.photophosphorylation.photosystem I.assembly and maintenance.assembly factor *(PSA2)'	'mercator4v5.0: protein involved in PS-I assembly *(PSA2) & original description: Homology to unknown gene (AHRD V1 *-*- Q010T6_OSTTA); contains Interpro domain(s) IPR001305 Heat shock protein DnaJ, cysteine-rich region '	Cp	1	Cp	Cp	Cp	C	72.1	thylakoid-peripheral-lumenal-side	plastid	plp_at_01190	Thylakoid	0.18	0.81	NA	Detected by both ITAG and Atlas
Solyc01g006330	PAP fibrillin family protein IPR006843 PAP fibrillin	FBN10	At1g51110	XP_010316007.1 Laizet et al (2004)	MTTIMEIGNLGVGFRPQIAINSTRKWRCKQFLGQKMQNKKNFLLVCSVASKVCSFSEEENGLIEALIGIQGRGRAASPQQLQEVERAVEVLEGSEGVPEPTSSSLIEGRWQLMFTTRPGSASPIQRTFVGVDSFSVFQEVFLRTNDQRVSNIVKFSEAIGELKVEALATIKDGKRILFQFDRAAFTFKFLPFKVPYPVPFRLLGDEAKGWLDTTYLSPSGNLRISRGNKGTTFVLQRETEPRQKLLSSISTGTRVEKAIDEFISLNQNVVNPELELLEGEWQMIWSSQVETDSWLENAGNGLMGNQIVKPNGQLKFLVGILFGIRFSMTGKYEKSGSNVYDVIMDDGAILAGMYGIPVEMESKFTIEILYTDDKIRISRGYNKILFVHVRVDGSNMKP	14	65	14	6.079	0.0392005	266	5	3	8	'35.1'	'not assigned.annotated'	'mercator4v5.0: not classified & swissprot: Probable plastid-lipid-associated protein 12, chloroplastic & original description: PAP fibrillin family protein (AHRD V1 *-*- B7KDB3_CYAP7); contains Interpro domain(s) IPR006843 PAP fibrillin'	-	2	-	none	Cp	Cp	81.93	thylakoid-peripheral-stromal-side	plastid	plp_at_00099; plp_at_01728	-	0.25	0.04	No	Detected by both ITAG and Atlas
Solyc01g006450	Enoyl reductase (AHRD V1 ***- P93062_BRA); contains Interpro domain(s) IPR014358 Enoyl-[acyl-carrier-protein] reductase (NADH)	ENR1	At2g05990	XP_010315949.1	MAASAASSFQITIARPSIFSTKRITSFCSTKFGGETQKLSCNRLASSCHVSSIQHFWRSFTSTTQKFQKVVTKAKSEADDSKPASVLPIDLRGKRAFIAGIADDNGYGWAIAKSLAAAGAEILVGTWVPALNIFETSLRRGKFDESRVLPDGSLMEITKVYPLDAVFDSLEDVPEDIKTNKRYAGSSKWTVSEVAESVKEDFGSIDILVHSLANGPEVTKPLLETSRRGYLAAISASSYSYVSLLKHFLPIMNPGGSSISLTYIASERIIPGYGGGMSSAKAALESDTRVLAFEAGRKQKVRVNTISAGPLRSRAAKAIGFIDMMIDYSIANAPLQRELSADEVGNTAAFLASPLASAITGAVIYVDNGLNAMGVGVDSPIFKDLNIPKSTE	8	53	4	3.642	0.0234855	395	5	3	8	'5.1.4.5'	'Lipid metabolism.fatty acid metabolism.plastidial fatty acid synthase (ptFAS) system.enoyl-ACP reductase *(ER)'	'mercator4v5.0: enoyl-ACP reductase & swissprot: Enoyl-[acyl-carrier-protein] reductase [NADH], chloroplastic & original description: Enoyl reductase (AHRD V1 ***- P93062_BRANA); contains Interpro domain(s) IPR014358 Enoyl-[acyl-carrier-protein] reductase (NADH)'	Cp	1	Cp	Cp	Cp	Cp	100	plastid stroma	plastid	plp_at_00173; plp_at_01364; plp_at_01636; plp_at_02511	Cp	0.99	0.01	No	Detected by both ITAG and Atlas
Solyc01g006540	Lipoxygenase (AHRD V1 **** Q96573_SOLLC); contains Interpro domain(s) IPR001246 Lipoxygenase, plant	TomLoxC, LoxC	At3g45140	NP_001233812.2 Heitz et al (1997)	MLKPQFQQSTKTLIPSWNTNTLFLASFPINILNKNFILKKKNNFRVHHNYNGANTIKAVLNSTQKSIGVKAVVTVQKQVNLNLLRGLDGIGDLLGKSLILWIVAAELDHKTGLEKPSIRSYAHRGLDVDGDTYYEAVFEIPEDFGEVGAILVENEHHKEMYVKNIVIDGFVHGKVEITCNSWVHSKFANPDKRIFFTNKSYLPSQTPSGVIRLREEELVTLRGDGVGERKVFERIYDYDVYNDLGEVDSNNDDAKRPILGGKKLPYPRRCRTGRQRSKKDPLYETRSTFVYVPRDEAFSAVKSLTFSGNTVYSALHAVVPALESVVSDPDLGFPHFPAIDSLFNVGVDLSGLSDKKSSLFNIVPRLIKSISETGKDVLLFESPQLVQRDKFSWFRDVEF…	27	189	22	7.984	0.051485	202	5	3	8	'11.7.1.2'	'Phytohormone action.jasmonic acid.biosynthesis.13-lipoxygenase *(LOX)'	'mercator4v5.0: 13-lipoxygenase *(LOX) & swissprot: Linoleate 13S-lipoxygenase 2-1, chloroplastic & original description: Lipoxygenase (AHRD V1 **** Q96573_SOLLC); contains Interpro domain(s) IPR001246 Lipoxygenase, plant'	-	5	Cp	none	Cp	C	100	plastid stroma	plastid	plp_at_00318; plp_at_01214; plp_at_01449; plp_at_01816; plp_at_02422	-	0.31	0	No	Detected by both ITAG and Atlas
Solyc01g006560	Lipoxygenase (AHRD V1 **** C0KKU8_SOLLC); contains Interpro domain(s) IPR001246 Lipoxygenase, plant	LOXF TomLoxF	At3g45140	NP_001234259.1 Mariutto et al (2011)	MLKPQLQQSSQSTKTLIPYWKTKPLCLASIPINTLNNKNLRVKKKKNFITKAVVSSTENSSYVQSSNIENSTSGKAIVIVQRTVGGTNLSLTRGLDDIGDLFGRSLFLSIVAAELDPKTGVEKPTIEGFARRGRDVDGNREYEVEFEIPEDFGDVGAILIENQQRKQMYVKNIVIDGFVHGKVEITCNSWVHSKYDNPDKRIFFTNKSYLPSQTPSGVKKLRETELVTLRGDGFGERKIYERIYDYDVYNDIGDPDGDGDGDGKRPVLGGKELPYPRRCRTGRARSEKDPLSESKGDFTYVPRDEAFSEVKDLSFSGNTIYAVLHAVVPGLQSIITDRDLGFPHFPAIDSLYNVEVELPALQTNSLFSIIRRLIRAISETRKDVLLFETPEFLERDKFA…	31	223	26	16.302	0.105124	105	5	3	8	'11.7.1.2'	'Phytohormone action.jasmonic acid.biosynthesis.13-lipoxygenase *(LOX)'	'mercator4v5.0: 13-lipoxygenase *(LOX) & swissprot: Linoleate 13S-lipoxygenase 2-1, chloroplastic & original description: Lipoxygenase (AHRD V1 **** C0KKU8_SOLLC); contains Interpro domain(s) IPR001246 Lipoxygenase, plant'	Cp	5	Cp	possibly M	Cp	C	100	plastid stroma	plastid	plp_at_00318; plp_at_01214; plp_at_01449; plp_at_01816; plp_at_02422	Cp	0.57	0	No	Detected by both ITAG and Atlas
Solyc01g006940	33-kd RNA binding protein	CP33	At3g52380	XP_004228672.1	MSVFSSSSSSSSSLHFFTQKPKFSVVEHISTSINNTHFNFKINNSINPIKSKPHFPISSLLASFSRISTHFSTSAVSDGAGVVGLDEEAELSAEEEIEEDEENEGGESLEKEEDGVVDEPKSIEDGRLYVGNLPFSMTPSQLSEIFAEAGKVANVEIVYDRVTDRSRGFAFVTMGSVEDAKEAVRLFDGSQVGGRTVKVNFPEVPRGGERQVMSAKIRSTYQGFVDSPHKLYVANLSWNLTSQGLKDAFADQPGFLSAKVIYDRASGRSRGFGFITFSSAEAMNNALDTMNEVDLEGRPLRLNIAGQRDPVSSPPVVKTSESENSVIL	11	91	11	7.577	0.0488604	214	5	3	8	'16.6.3.3.3'	'RNA processing.organelle machinery.RNA homeostasis.plastidial mRNA stabilisation.ribonucleoprotein *(CP33a)'	'mercator4v5.0: plastidial ribonucleoprotein *(CP33a) & swissprot: 33 kDa ribonucleoprotein, chloroplastic & original description: Poly(U)-binding-splicing factor PUF60 (AHRD V1 *--* PUF60_BOVIN); contains Interpro domain(s) IPR003954 RNA recognition, region 1'	Cp	1	Cp	Cp	Cp	Cp	99.9	plastid stroma	plastid	-	Cp	0.88	0.01	No	Detected by both ITAG and Atlas
Solyc01g006980	Malonyl CoA-acyl carrier protein transacylase containing protein expressed (AHRD V1 ***- Q10MS3_ORYSJ); contains Interpro domain(s) IPR004410 Malonyl CoA-acyl carrier protein transacylase	MCAT	At2g30200	XP_004228628.1	MSCSSSLILPSISSNGFRRFSPLKLDKSRVFMSSISVGSQIAAVDDALFADYKPTNAFLFPGQGAQAVGMGAEAQKVPAAAELYKRANEIMGFDLLDICINGPKEKLDSTVLSQPAIYVTSLAAVEILRAREGGQQIIDSVDVTCGLSLGEYTALAFTGAFSFEDGLKLVKLRGEAMQDAADAAKSAMVSIIGLDSDKVQKLCDAANEEVDEANKVQIANFLCPGNYAVSGGVKGIEAVEAKAKSFKARMTVRLAVAGAFHTSFMNPAVSRLEAALSATEIRTPRIPVISNVDAQPHADPDTIKKILASQVTSPVQWETTIKTLLTKGLKKSYELGPGKVIAGIVKRMDRGAEIENIGA	9	116	9	18.307	0.118053	91	5	3	8	'5.1.5.4'	'Lipid metabolism.fatty acid metabolism.mitochondrial fatty acid synthase (mtFAS) system.malonyl-CoA:ACP transacylase *(MCAT)'	'mercator4v5.0: malonyl-CoA:ACP transacylase *(MCAT) & original description: Malonyl CoA-acyl carrier protein transacylase containing protein expressed (AHRD V1 ***- Q10MS3_ORYSJ); contains Interpro domain(s) IPR004410 Malonyl CoA-acyl carrier protein transacylase'	Cp	2	Cp	Cp	Cp	Cp	90.5	plastid stroma	plastid	plp_at_02514	Cp	0.87	0.04	No	Detected by both ITAG and Atlas
Solyc01g007740	Peroxiredoxin (AHRD V1 **-- Q9FE12_PHAVU); contains Interpro domain(s) IPR000866 Alkyl hydroperoxide reductase/ Thiol specific antioxidant/ Mal allergen	2-CYS-Prx2	At5g06290	NP_001315983.1	MASIVTSTALLSSSNPRVFASASASSALPKLPSFSQSTIVPSSSSFNGLRSCNTSVSRINKSRSFVVRASSEVPLVGNKAPDFEAEAVFDQEFIKVKLSEYIGKKYVILFFYPLDFTFVCPTEITAFSDRYEEFKNVNTEILGVSIDSVFSHLAWVQTDRKTGGLGDLNYPLISDVTKSISKSYNVLIPDQGIALRGLFIIDKEGVIQHSTINNLAIGRSVDETLRTLQALQYVQENPDEVCPAGWKPGDKSMKPDPKGSKEYFASI	9	107	6	10.938	0.0705339	147	5	3	8	'10.3.2.1'	'Redox homeostasis.thiol-based redox regulation.peroxiredoxin activities.typical 2-Cys peroxiredoxin *(2-CysPrx)'	'mercator4v5.0: typical 2-Cys peroxiredoxin *(2-CysPrx) & swissprot: 2-Cys peroxiredoxin BAS1-like, chloroplastic & original description: Peroxiredoxin (AHRD V1 **-- Q9FE12_PHAVU); contains Interpro domain(s) IPR000866 Alkyl hydroperoxide reductase/ Thiol specific antioxidant/ Mal allergen'	Cp	1	Cp	Cp	Cp	Cp	99.9	plastid stroma	plastid	plp_at_00493; plp_at_02371	Cp	1	0	No	Detected by both ITAG and Atlas
Solyc01g007880	Accumulation and replication of chloroplasts 3; MORN repeat protein (AHRD V1 *--- D4V7H0_BACVU); contains Interpro domain(s) IPR019746 Tubulin/FtsZ, N-terminal	ARC3	At1g75010	XP_004228899.1	MDLLLPIPARLSTFSRAAVCTFSPANPFNSNSFTCRKVRFRVSCCTKPVRVETNSNFNRRDGNNCEVNREDDDTGEAGGLKNVWEETEFVEVFGIGSRKDALLEFCLASPYLSPALRFWNVLVKDSEKVLLQEKVPIEDVSSRIVEVPSAINSCSKAVILVASAAYGTDHVPALDIIRKLKSRNGLAVGIILKPFSFEGRRRYDEVTDLIDKLQKHATVCIVIDTDGLLKKDLLTLDEALKTSYNAVLMAVNAISILMSEDHIKLLDATDCGTKELSGPELIKILESYKEAKTGFGAGYNVETSILRAVYDCPFLGLGVKGSNGVVICIIASSGVVNSSDVRSILRTFRQTTGCNGDIVISIVQEANLEPNLIVTTVVTCGYATQEPSEKSSLFSRLAQ…	2	2	2	0.103	0.000664197	1204	2	1	3	'13.5.2.4'	'Cell division.plastid division.spatial regulation.assembly factor *(ARC3)'	'mercator4v5.0: plastid division FtsZ assembly factor *(ARC3) & swissprot: Protein ACCUMULATION AND REPLICATION OF CHLOROPLASTS 3 & original description: MORN repeat protein (AHRD V1 *--- D4V7H0_BACVU); contains Interpro domain(s) IPR019746 Tubulin/FtsZ, N-terminal'	Cp	2	Cp	Cp	Cp	PM	26.4	plastid stroma	-	-	Cp	0.93	0.01	No	Detected by both ITAG and Atlas
Solyc01g008070	Alpha/beta superfamily hydrolase (AHRD V1 *--- D0CIF5_9SYNE); contains Interpro domain(s) IPR010765 Protein of unknown function DUF1350	-	At5g47860	XP_004228544.1	MNCVTAPKANWRCSPAISFYSDSTKLYNRSSIRFYAGNRNSSRIRCNLKATGSSNNQPETSTGIQLYRDIERLLTETVKQSQDWGSSQDWDEIEGAWVLQPKTSKPKLVVHFIGGVFVGAAPQLSYRLFLERLRQKDVLVIATPYASGFDHFYIADEVQFKFDRCLRFLQERVQDLPVFGIGHSLGSVIHLLIGARYAVKRNGNVLMAFNNKDASLAVPLFSSVLVPMMQNLGPVLSQIASSPTIRLGAEMTMKQIENLSPSIMKQVFPLVEQLTPLYTDLINGKENFTPRPEETQRLIRSYYGISRNLLVKFKDDTIDETSTLAQVLSSGSAISSMLDMSIRTLPGDHALPLQQALPNAPPGMTDAVNRSSELLANLTAGTPWENVTKEVGNTLGNVD…	3	17	3	3.642	0.0234855	396	5	3	8	'35.2'	'not assigned.not annotated'	'mercator4v5.0: not classified & original description: Alpha/beta superfamily hydrolase (AHRD V1 *--- D0CIF5_9SYNE); contains Interpro domain(s) IPR010765 Protein of unknown function DUF1350'	Cp	4	Cp	none	Cp	Cp	99.6	plastid	plastid	-	Cp	0.77	0	No	Detected by both ITAG and Atlas
Solyc01g008160	SG1, SLOW GREEN 1; Tetratricopeptide repeat-containing protein (AHRD V1 ***- D7L8H9_ARALY); contains Interpro domain(s) IPR011990 Tetratricopeptide-like helical	SG1	At3g18420	XP_004228536	MNSTLTIGSSSFFHHSTTFPNSPSRSSIFTIPKTAHKSYSRRFVLQASVNGNSKSNPLISTLKSAGVAVVFAAVALGKFPVGTSLARAETPPAAVMEEQQQQEEEEGSPLTQFLESSPEAIEALKNLLQEKLESGEDEESLKILKKLSSAQPENTEWKFLTARLLNEMGKLEDAREVFEEILSKTPLSFEALFENALLMDRCGEGVKVIQRLEEALRLAEEESKVKESRDIRFIMAQVQFLQKNVEEALRSYDELEKEDPKDFRPYFCRGMIYSLLDRNKEAREQFAKYRELSPKKFEVEGYLRTALSRMKLFGTDEKES	6	13	6	1.404	0.00905372	717	5	1	6	'35.1'	'not assigned.annotated'	'mercator4v5.0: not classified & swissprot: protein SLOW GREEN 1, chloroplastic & original description: Tetratricopeptide repeat-containing protein (AHRD V1 ***- D7L8H9_ARALY); contains Interpro domain(s) IPR011990 Tetratricopeptide-like helical'	Cp	2	Cp	Cp	Cp	Cp	98.4	envelope	plastid	plp_at_01066	Thylakoid	0.44	0.56	No	Detected by both ITAG and Atlas
Solyc01g008250	Thioredoxin X (AHRD V1 ***- B6T9S0_MAIZE); contains Interpro domain(s) IPR015467 Thioredoxin, core	Trx-x	At1g50320	XP_004228532.1	MATMASVATSTSRISYPMTHSFNTTCNFASPFRSSFSSLAWKKVRFSIGNRGRKLGFRNCSTLRISCGGGLTEIKEDEFSDVVLKSDRPVLVEFVATWCGPCRLIGPAMESVAEEYKEKITVVKIDHDASPKLIEEYKVYGLPTLILFKDGKEVPDSKREGAITKVKLKEYLDGLLKTVSIA	8	59	8	7.377	0.0475707	220	5	3	8	'10.3.3.4'	'Redox homeostasis.thiol-based redox regulation.thioredoxin activities.X-type thioredoxin *(Trx-X)'	'mercator4v5.0: X-type thioredoxin *(Trx-X) & swissprot: Thioredoxin X, chloroplastic & original description: Thioredoxin X (AHRD V1 ***- B6T9S0_MAIZE); contains Interpro domain(s) IPR015467 Thioredoxin, core'	Cp	1	Cp	Cp	Cp	Cp	99.9	plastid stroma	plastid	plp_at_02493	Cp	1	0	No	Detected by both ITAG and Atlas
Solyc01g008330	Acetyl-CoA carboxylase biotin carboxylase (AHRD V1 ***- B4VQU4_9CYAN); contains Interpro domain(s) IPR004549 Acetyl-CoA carboxylase, biotin carboxylase	CAC2	At5g35360	XP_004228525.1	MDSAAMTSVCGKSALCSTPGLFLGRTNGIRSSQCSFIAGNRINFPRQTAQAHRVRTNSRKGHGALTVTCRAEKILVANRGEIAVRVIRTAHEMGIPCVAVYSTIDKDALHVKLADESVCIGEAPSNQSYLVIPNVLSAAISRGCTMLHPGYGFLSENASFVEMCREHGINFIGPNPDSIRVMGDKATARDTMKNAGVPTVPGSDGLLQSTEEGVKLAEEIGYPVMIKATAGGGGRGMRLAKEPNEFVKLLQQAKSEAAAAFGNDGVYLEKYIVNPRHIEFQVLADKYGNVVHFGERDCSIQRRNQKLLEEAPSPALTPELRKAMGDAAVAAAASIGYIGVGTIEFLLDERGSFYFMEMNTRIQVEHPVTEMISSVDLIEEQIRVAMGEKLRYKQEDIVL…	20	104	20	6.055	0.0390458	271	5	3	8	'5.1.3.2.3.1'	'Lipid metabolism.fatty acid metabolism.acetyl-CoA carboxylation.polymeric acetyl-CoA carboxylase complex.BC-BCCP-BADC subcomplex.biotin carboxylase component *(BC)'	'mercator4v5.0: biotin carboxylase component of polymeric acetyl-CoA carboxylase complex & swissprot: Biotin carboxylase 1, chloroplastic & original description: Acetyl-CoA carboxylase biotin carboxylase (AHRD V1 ***- B4VQU4_9CYAN); contains Interpro domain(s) IPR004549 Acetyl-CoA carboxylase, biotin carboxylase'	Cp	2	Cp	none	Cp	Cp	52.2	envelope-inner-peripheral-stromal-side	plastid	plp_at_01577; plp_at_02608	Cp	0.99	0	No	Detected by both ITAG and Atlas
Solyc01g008920	Uncharacterized protein; NAD(P)-binding Rossmann-fold superfamily protein	-	At4g31530	XP_004228880.3	MASKISVSPFWNLPISTQKTQIFTQFPLLQHFTSSSRFNSSKLKSISYKSISLSAAVTEESQTSPPASSSPVSSSKLVLVVGGSGGVGQIVVASLLNRNVKLRLILRDPEKATTLFGEQDEEKLQVWKGDTRSPTGIDPSVFEGVTHVICCTGTTAFPSRRWDGDNTPERVDWDGVRNLVSALPKSLKRIVLVSSIGVTKFNELPWSIMNLFGVLKYKKMGEDFVRNSGLPFTIIRAGRLTDGPYTSYDLNTLLQATAGERRAVLIGQGDKLVGEVSRLVVAEACIQALDIDFTEGQTYEVNSIPGDGPGTDTLKWQELFRASHSN	10	37	10	5.813	0.0374852	280	5	3	8	'1.1.1.5.3.2.3'	'Photosynthesis.photophosphorylation.photosystem II.photosynthetic acclimation.non-photochemical quenching (NPQ).qH-type antenna quenching.regulatory protein *(ROQH1)'	'mercator4v5.0: regulatory protein *(ROQH1) of non-photochemical quenching & swissprot: Uncharacterized protein At2g37660, chloroplastic & original description: NAD dependent epimerase/dehydratase family protein expressed (AHRD V1 **-- Q10L97_ORYSJ); contains Interpro domain(s) IPR013120 Male sterility, NAD-binding'	Cp	1	Cp	Cp	Cp	Cp	100	plastid stroma	plastid	plp_at_00456; plp_at_01517	Cp	0.91	0.05	No	Detected by both ITAG and Atlas
Solyc01g008930	Phycoerythrobilin ferredoxin oxidoreductase (AHRD V1 **** Q6E5A3_MAIZE); contains Interpro domain(s) IPR009249 ferredoxin-dependent bilin reductase	HY2 GUN3	At3g09150	NP_001234133.2	MECFSSLGWFCISNPSFIGLKSKKKYSLSRKCRSFNEVGSKCVSMSYTENESSGVSYKKLIHFALEETNTHTLLSPSPLQEKYSSLLSMDDKTELQMLSFEAHKIRLLRSLCIEGSDGMQVLDFAAFPKPEFDLPIFCANFFTTAKMNIIVLDLNPLHDIMDQEDYKEKYYKDLITLGLKYSKLLPWGGKLTSESLRFFSPIVIWTRFSSSPHNHSVLFSAFKDYYQAWLGLMDRSEGETDASQIACNCEAQHRYLTWRSEKDPGHGVLKRLIGEDLAKDVITKFLFNGVNELGNKTFLDYFPEYRCEDGKVNEKRSMIGKSFENRPWNARGEFIGDRVEIV	3	4	3	0.54	0.0034822	970	1	2	3	'7.14.3'	'Coenzyme metabolism.heme biosynthesis.phytochromobilin synthase'	'mercator4v5.0: phytochromobilin synthase & swissprot: Phytochromobilin:ferredoxin oxidoreductase, chloroplastic & original description: Phycoerythrobilin ferredoxin oxidoreductase (AHRD V1 **** Q6E5A3_MAIZE); contains Interpro domain(s) IPR009249 Ferredoxin-dependent bilin reductase'	Cp	3	Cp	Cp	Cp	Cp	99.9	plastid stroma	plastid	-	-	0.41	0.17	No	Detected by both ITAG and Atlas
Solyc01g009010	4-diphosphocytidyl-2-C-methyl-D-erythritol kinase (AHRD V1 ***- A4USB3_NICBE); contains Interpro domain(s) IPR004424 4-diphosphocytidyl-2C-methyl-D-erythritol kinase	CMK	At2g26930	NP_001295301.1 Rohdich et al (2000)	MASCNILCSVKPQIDSFKKSCFFQSWSNRPHGSSYFNKNIQFRRNSFVIVKASGSRTSKKQVEITYNPEEKFNKLADEVDREAGLSRLTLFSPCKINVFLRITSKRDDGYHDLASLFHVISLGDKIKFSLSPSKSKDRLSTNVAGVPLDERNLIIKALNLYRKKTGTDNYFWIHLDKKVPTGAGLGGGSSNAATTLWAANQFSGCVATEKELQEWSGEIGSDIPFFFSHGAAYCTGRGEVVQDIPSPIPFDIPMVLIKPQQACSTAEVYKRFQLDLSSKVDPLSLLEKISTSGISQDVCVNDLEPPAFEVLPSLKRLKQRVIAAGRGQYDAVFMSGSGSTIVGVGSPDPPQFVYDDEEYKDVFLSEASFITRPANEWYVEPVSGSTIGDQPEFSTSFDMS	7	22	7	2.728	0.0175916	486	5	3	8	'9.1.2.5'	'Secondary metabolism.terpenoids.methylerythritol phosphate (MEP) pathway.4-diphosphocytidyl-2-C-methyl-D-erythritol kinase'	'mercator4v5.0: 4-diphosphocytidyl-2-C-methyl-D-erythritol kinase & swissprot: 4-diphosphocytidyl-2-C-methyl-D-erythritol kinase, chloroplastic/chromoplastic (Fragment) & original description: 4-diphosphocytidyl-2-C-methyl-D-erythritol kinase (AHRD V1 ***- A4USB3_NICBE); contains Interpro domain(s) IPR004424 4-diphosphocytidyl-2C-methyl-D-erythritol kinase'	Cp	2	Cp	possibly Cp	Cp	Cp	100	plastid	plastid	-	Cp	0.99	0	No	Detected by both ITAG and Atlas
Solyc01g009080	FHA domain containing protein (AHRD V1 ***- B6TP39_MAIZE); contains Interpro domain(s) IPR000253 Forkhead-associated	-	At2g21530	XP_004228475.1	MELTTTSQSISYANLPKIPSFFPSRVTISSSNSINFLGYNCITKKIKCSARQLRHFGPIYASMVESNSTNGSVSWILEFIGDGDTRHIGSPTAKPRSLEIPSGAVIVGRVADKADVVIPVPTVSAIHARLQNMEDYLVVTDLDSTNGTFIGEKRLVPGVAAAALPGSLVTFGDTNLAIFRVAKFEKMETNASEVEEEEPSST	4	35	4	20.544	0.132478	74	5	3	8	'35.2'	'not assigned.not annotated'	'mercator4v5.0: not classified & original description: FHA domain containing protein (AHRD V1 ***- B6TP39_MAIZE); contains Interpro domain(s) IPR000253 Forkhead-associated'	Cp	3	Cp	none	Cp	Cp	99.8	thylakoid-peripheral-stromal-side; plastid stroma	plastid	plp_at_01761	Cp	0.8	0.01	No	Detected by both ITAG and Atlas
Solyc01g009180	5-methyltetrahydropteroyltriglutamate--homocysteine methyltransferase (AHRD V1 ***- B6UF55_MAIZE); contains Interpro domain(s) IPR006276 5-methyltetrahydropteroyltriglutamate--homocysteine S-methyltransferase (homocysteine to Met biosynthesis CYTOSOL)	MS1	At5g20980	XP_004228469.1	MLTVAKKLSSIYMRLVLPTPSSSTFLSFGSSVSVFSPPRGTQFLRLNFRFRTMASHVVGYPRMGPKRELKFALESFWDGKSNSEDLEKVAADLRLSIWKQMADAGIKYIPSNTFSYYDQVLDTTAMLGAVPPRYGWNGGEIGFDVYFPMARGNASVPAMEMTKWFDTNYHYIVPELGPDVKFSYASHKAVSEYKEAKSLGIDTVPVLVGPVSFLLLSKAAKGVEKSFPLLSLIEKILPVYKEVIAELKAAGASWIQFDEPTLVKDLDSHQLQAFSHAYSELESPLSGLNVLIETYFADVPAEAFKTVTSLKCVTALGFDLVRGSKNLDLIKSGFPSEKYLFAGVVDGRNIWANDLAASLSTLQALENVVGKDKLVVSTSCSLLHTAVDLVNETKLDEEI…	9	17	9	0.688	0.00443658	910	5	3	8	'4.2.2.6.2.1'	'Amino acid metabolism.aspartate group amino acid biosynthesis.aspartate-derived amino acids.methionine.L-homocysteine S-methyltransferase activities.methyl-tetrahydrofolate-dependent methionine synthase'	'mercator4v5.0: methyl-tetrahydrofolate-dependent methionine synthase & swissprot: 5-methyltetrahydropteroyltriglutamate--homocysteine methyltransferase & original description: 5-methyltetrahydropteroyltriglutamate--homocysteine methyltransferase (AHRD V1 ***- B6UF55_MAIZE); contains Interpro domain(s) IPR006276 5-methyltetrahydropteroyltriglutamate--homocysteine S-methyltransferase'	Cp	3	Cp	M	Cp	Cp	83.2	plastid stroma	plastid	-	Cp	0.53	0.01	No	Detected by both ITAG and Atlas
Solyc01g009970	Amidohydrolase 2 (AHRD V1 ***- Q01SB2_SOLUE); contains Interpro domain(s) IPR006992 Amidohydrolase 2	-	At2g35450	XP_004228429.1	MVAAVTVNSLKPLTCAPFFSSLNSFNCPCSLVSIPTIHSRLRPLLAQMAATGEVEPQVIDSHLHVWASPQEAAEKYPYFPGQEPSLTGHVEFLLECMEEAGVDGALIVQPINHKFDHSYVTSVLKKFPSKFVGCCLANPAEDGSGIKHLEDLVLKDGYRAVRFNPYLWPSGEKMTNKIGKALFSKAGELGVPVGFMCMKGLLLHLQEIEELCTEFPSTVVLLDHVAFCKPPKNDEERRGYSELLKLSRFPQVYVKFSALFRVSRNPYPYEDLPHVLPQLVSSYGAHRIMWGSDFPYVVAECGYKEAREAVSYLAKQGHLPSSATEWIMGKTIMQLFDGKWSSVAN	7	30	7	4.878	0.0314559	327	5	3	8	'35.2'	'not assigned.not annotated'	'mercator4v5.0: not classified & original description: Amidohydrolase 2 (AHRD V1 ***- Q01SB2_SOLUE); contains Interpro domain(s) IPR006992 Amidohydrolase 2'	Cp	5	Cp	possibly Cp	Cp	PM	40.8	plastid stroma	plastid	-	Cp	1	0	No	Detected by both ITAG and Atlas
Solyc01g009990	Peptidyl-prolyl cis-trans isomerase (AHRD V1 ***- B9RMA5_RICCO); contains Interpro domain(s) IPR002130 Peptidyl-prolyl cis-trans isomerase, cyclophilin-type	CYP20-2 PNSL5	At5g13120	XP_004228428.1	MAATFASVSNLGSISVPRVANPTYAAYPKLLKSSFSSSSLFGGSLRLDTSSNRSVHKKTGGSSGSIQAAVEVADLQSKVTNKVYFDISIGNPVGKLAGRIVIGLYGDDVPQTAENFRALCTGEKGFGFKDSAFHRVIKDFMIQGGDFDKGNGTGGKSIYGRTFKDENFKLVHTGPGIVSMANAGPNTNGSQFFICTVKTPWLDQKHVVFGQVLEGMDIVKLIESQETDRGDRPRKRVVISDCGELPIV	10	191	10	30.623	0.197473	55	5	3	8	'1.1.8.1.4.5'	'Photosynthesis.photophosphorylation.chlororespiration.NADH dehydrogenase-like (NDH) complex.lumen subcomplex L.component *(PnsL5)'	'mercator4v5.0: component *(PnsL5) of NDH lumen subcomplex L & swissprot: Photosynthetic NDH subunit of lumenal location 5, chloroplastic & original description: Peptidyl-prolyl cis-trans isomerase (AHRD V1 ***- B9RMA5_RICCO); contains Interpro domain(s) IPR002130 Peptidyl-prolyl cis-trans isomerase, cyclophilin-type'	Cp	1	Cp	Cp	Cp	Cp	99.9	thylakoid-peripheral-lumenal-side	plastid	plp_at_00506; plp_at_01684; plp_at_01882; plp_at_01952	Cp	0.98	0.01	No but known to be lumenal	Detected by both ITAG and Atlas
Solyc01g010460	Protein targeting to starch (PTST) homolog 2	PTST2	At1g27070	XP_019069687.1	MVSLILTPTHLSFSPIPTPIVINSPKRLHCRRKAAIFNLVLGKNMGSFQVFKKLSKKRVGDSSYCLCRKGLGSEGDMELEEEILAFMEISENPNVFPTRKELEKAGRVDLVEAIKKRGGWFSFGWDSEDDDTNTVNVNVNEVESVEMNFDIEEFHERVKRCQESDLLHENEAHFSGSGDSSSSQPASSSGRSIETVAEENSGIEGILSRLEKERNSSLGIDLGKPGHTSHTSSRDNIDDRSFGTSDADRTDLRKNESLSKGSSMKDIQSDEEIYRSVSPARLRKWSIQRAGLQDIDFEAAEVALGKSWIGSTSEASGDDVVNITASRFEALQRSKNGNNNEMSTRLKHLELELSMTLRSLKSKSEEFSSKEVLICVFCFS	1	1	1	0.155	0.00099952	1160	1	0	1	'35.1'	'not assigned.annotated'	'mercator4v5.0: not classified & swissprot: Protein PTST homolog 2, chloroplastic & original description: Unknown Protein (AHRD V1)'	Cp	2	Cp	possibly Cp	Cp	G	27.2	plastid	-	-	Cp	0.78	0.03	No	Detected by both ITAG and Atlas
Solyc01g028810	RuBisCO large subunit-binding protein subunit beta, chaperonin (AHRD V1 ***- B4VMY1_9CYAN); contains Interpro domain(s) IPR001844 Chaperonin Cpn60	CPN60B2	At3g13470	XP_004228946.1	MASTFAGMSSAGPLAAPSTSSNKLSSVANISSTSFGSKRNVALKKSRRPTILAAAKELHFNKDGSAIKKLQNGVNKLADLVGVTLGPKGRNVVLESKYGAPKIVNDGVTVAREVELEDPVENIGAKLVRQAAAKTNDLAGDGTTTSVVLAQGLIAEGVKVVAAGANPVLITRGIEKTAKALVAELKNMSKEVEDSELADVAAVSAGNNLEVGSMIAEAMSKVGRKGVVTLEEGKSAENSLRVVEGMQFDRGYVSPYFVTDSEKMSVEYENCKLLLVDKKITNARDLVNVLEDAIRNGYPILIIAEDIEQEALATLVVNKLRGALKVAALKAPGFGERKSQYLDDIATLTGGTVIREELGLTLDKADKEVLGHAAKVVLTKDATTIVGDGSTQEAVNKRV…	34	255	27	19.62	0.12652	84	5	3	8	'1.1.8.1.6.2.2'	'Photosynthesis.photophosphorylation.chlororespiration.NADH dehydrogenase-like (NDH) complex.assembly and maintenance.Cpn60 chaperonin heterodimer.subunit beta'	'mercator4v5.0: subunit beta of Cpn60 chaperonin complex & swissprot: Chaperonin 60 subunit beta 2, chloroplastic & original description: chaperonin (AHRD V1 ***- B4VMY1_9CYAN); contains Interpro domain(s) IPR001844 Chaperonin Cpn60'	Cp	1	Cp	Cp	Cp	Cp	99.9	plastid stroma	plastid	plp_at_01428; plp_at_02399	Cp	1	0	No	Detected by both ITAG and Atlas
Solyc01g057780	Zinc finger protein VAR3, chloroplastic (AHRD V1 **-- VAR3_ARATH); contains Interpro domain(s) IPR001876 Zinc finger, RanBP2-type	VAR3	At1g55040	XP_004229106.1	MASRFISLLGTPFPTFLNHLRCPSFLHLRRLACGSRRFTAYSHPHISPLSPSQQQFHAQPINNNTPLDSSSSSSSFTSHPWPEWRSLITLLTGNDQLPPAVEDSDSFVTYEELSQDFLRAATLCLDFARERPNFIGLLSRRDIEAVVSNGTPFLFKGALETARRMRAFLGIDGSTVLDHGNANTVDLMKYILCYASKPSVSSEKNSLYSRDLIESSCRSLLRELVEVSCGAPAVNLPPAEQYDFSGRYGQTPRPIRQNIVMKRGDWICQKCNFMNFARNNKCLECEEPRPRRQLTGGEWECPQCYFFNYGRNVVCLRCDFGRPAGASPRTTHSSAEDGYNGNSAYSNGMDLKLAENEEKAQRWFSKISQMKNASDMDSAAADEDFPEIMPPRKGENKFV…	1	2	1	0.059	0.000380463	1237	2	0	2	'16.6.2.2.7'	'RNA processing.organelle machinery.RNA modification.C-to-U RNA editing.RNA editing factor *(OZ)'	'mercator4v5.0: RNA editing factor *(OZ) & swissprot: Zinc finger protein VAR3, chloroplastic & original description: Zinc finger protein VAR3, chloroplastic (AHRD V1 **-- VAR3_ARATH); contains Interpro domain(s) IPR001876 Zinc finger, RanBP2-type'	M	4	Cp	possibly M	Cp	N	99.1	plastid; mitochondria	plastid	-	M	0.31	0	No	Detected by both ITAG and Atlas
Solyc01g057830	30S ribosomal protein S1 (AHRD V1 **-- B4FUZ5_MAIZE); contains Interpro domain(s) IPR003029 Ribosomal protein S1, R binding domain	RPS1A	At5g30510	XP_004229034.1	MASLTQQFVGLKCPPMSTTRLVNPSNYHHHQSKQKPRIVIQAAAVIANAQTRERLKLKEMFEDAYERCRTTPMEGVAFTVDDFHSALEKYDFDSEVGTKVKGTVFSVDANGALVDITAKSSAYLPLREASLHTIRHVEEAGIFPGLREEFVVVGENEADDSLVLSLRSIQYDLAWERCRQLQAEDVVIKGKVVGANKGGVVALVEGLRGFVPFSQISTKSTAEELLEKELPLKFVEVDEEQSRLVLSNRKAMADSQAQLGIGSVVLGSVQSLKPYGAFIDIGGINGLLHVSQISHDRVSDIATVLQPGDTLKVMILSHDRERGRVSLSTKKLEPTPGDMIRNPKLVFEKAEEMAQTFRQRIAQAEAMARADMLRFQPESGLTLNSDGILGPLTSELPED…	22	177	13	60.897	0.392695	31	5	3	8	'17.6.2.3.1'	'Protein biosynthesis.organelle machinery.plastidial ribosome biogenesis.small ribosomal subunit proteome.component *(bS1c)'	'mercator4v5.0: component *(bS1c) of small plastid ribosomal-subunit proteome & swissprot: 30S ribosomal protein S1, chloroplastic & original description: 30S ribosomal protein S1 (AHRD V1 **-- B4FUZ5_MAIZE); contains Interpro domain(s) IPR003029 Ribosomal protein S1, RNA binding domain'	Cp	4	Cp	Cp	Cp	Cp	94.7	plastid ribosome	plastid	plp_at_00539	Cp	0.98	0.02	No	Detected by both ITAG and Atlas
Solyc01g067290	NAD-dependent epimerase/dehydratase (AHRD V1 **-- C8RY11_9RHOB); contains Interpro domain(s) IPR016040 NAD(P)-binding domain	DVR	At5g18660	XP_010321210.1	MSLFAPSSGLTLLQSTKDQNFRQLFSSHFINHVQVRTVPYATPFLSVNVSGRPFRVSSRKLKPIIASAASTVETPKISFRGKNPKDINVLVVGSTGYIGKFVVKELTSRGFNVIAVAREKSGIKGKNSKDDTLEQLNGANVCFSDVTNLETLEKSVQGLGVSIDVVVSCLASRNGGVKDSWNIDYEATKNSLVAGRKFGASHFVLLSAICVQKPLLEFQRAKLKFEAELMKEAEEDNGFTYSIVRPTAFFKSLGGQVELVKDGKPYVMFGDGKLCACKPISEQDLASFMADCVLKEDKINQVLPIGGPGKALTPLEQGEMLFKLVGKEPKFLKVPIEIMDFAIGFLDFLVKIFPSLEDAAEFGKIGRYYAAESMLIWDPDTGEYNAEATPSYGNDTLED…	10	46	10	5.31	0.0342416	302	5	3	8	'7.15.1.5'	'Coenzyme metabolism.chlorophyll metabolism.chlorophyll biosynthesis.divinyl chlorophyllide-a 8-vinyl-reductase *(DVR)'	'mercator4v5.0: divinyl chlorophyllide-a 8-vinyl-reductase & swissprot: Divinyl chlorophyllide a 8-vinyl-reductase, chloroplastic & original description: NAD-dependent epimerase/dehydratase (AHRD V1 **-- C8RY11_9RHOB); contains Interpro domain(s) IPR016040 NAD(P)-binding domain'	Cp	2	Cp	possibly Cp	Cp	Cp	87.8	plastid	plastid	plp_at_01561	Cp	0.99	0	No	Detected by both ITAG and Atlas
Solyc01g067630	NAD(P)-binding Rossmann-fold superfamily protein	-	At2g39080	XP_004229199.1	MATITSATSMIGIQCNFEPPQQHFFNRSIKCSLSIPPISSPKFTLHKLSLHAMPANSFRANASSAIDAPSEELEASSRGGIGANDLLIVGPGVLGRLVAERWREEYPGCQIFGQTMTTDHHDELTKMGISPSSRETKFMFKFPYVIYCAPPSRTEDYPGDVRDAALKWSGEGSFLFTSSSAPYDCSDNGSVDEVMVP	2	13	2	1.683	0.0108529	653	4	3	7	'35.2'	'not assigned.not annotated'	'mercator4v5.0: not classified & original description: MRNA complete cds clone RAFL24-13-K22 (AHRD V1 ***- Q67YQ9_ARATH)'	Cp	1	Cp	Cp	Cp	Cp	96	plastid stroma	plastid	-	Cp	0.98	0.02	No	ITAG only
Solyc01g067730	Acyl carrier protein (AHRD V1 ***- Q9XF20_CAPCH); contains Interpro domain(s) IPR003231 Acyl carrier protein (ACP)	ACP5	At3g05020	XP_004229194.1	MASVTGSSFAISSLSSSFNPNKACLKTSSLSIKGISFPSLRVKPATRRFSISCAAKPETVDKVCEIVKKQLALPSDSAVNGESKFIALGADSLDTVEIVMGLEEAFGITVEEENAQTIATVQDAADLIEDLVAKKC	2	8	2	2.162	0.0139417	557	5	3	8	'5.1.4.1'	'Lipid metabolism.fatty acid metabolism.plastidial fatty acid synthase (ptFAS) system.acyl carrier protein *(ptACP))'	'mercator4v5.0: acyl carrier protein *(ptACP)) & swissprot: Acyl carrier protein 1, chloroplastic & original description: Acyl carrier protein (AHRD V1 ***- Q9XF20_CAPCH); contains Interpro domain(s) IPR003231 Acyl carrier protein (ACP)'	Cp	1	Cp	Cp	Cp	Cp	100	-	plastid	-	Cp	1	0	No	Detected by both ITAG and Atlas
Solyc01g067750	Bifunctional 3-dehydroquinate dehydratase/shikimate dehydrogenase	-	At3g06350	NP_001234051.1	MELVVDSGVKKMEGEAMRKNQTLICAPIMADSVDQMLILMQKAKISGADLVEVRVDSLKSFNPRPDIDTLIKQCPLPTLFTYSYVLGVGQGILLIRYYKGIGPTWEGGQYAGDEKSRLDALRLAMELGADYIDVELKAIGEFNNALHGNKSAKCKLIVSSHNYESTPSAEDLGNLVARIQASGADIVKFATTAQDITDVARVFQITVHSQVPIIAMVMGEKGLMSRILCPKFGGYLTFGTLEVGKVSAPGQPTVEDLLNLYNFRQLGPDTKIFGIIGKPVSHSKSPLLYNESFRSVGFNGVFMHLLVDDIANFFRTYSSLDFAGFSCTIPHKEAALDCCAEIDPTAKAIGAVNCIIRRPDGKLFGCNTDYIGAISAIEEGLQGSQPSISGSPLAGKLFV…	10	36	10	2.481	0.0159988	530	5	3	8	'4.5.1.3'	'Amino acid metabolism.shikimate group amino acid biosynthesis.shikimate pathway.3-dehydroquinate dehydratase and shikimate dehydrogenase'	'mercator4v5.0: 3-dehydroquinate dehydratase and shikimate dehydrogenase & swissprot: Bifunctional 3-dehydroquinate dehydratase/shikimate dehydrogenase, chloroplastic & original description: Shikimate dehydrogenase (AHRD V1 ***- B6TSW1_MAIZE); contains Interpro domain(s) IPR001381 Dehydroquinase class I'	-	2	-	none	Cp	C	99.55	stroma	plastid	-	-	0	0	No	Detected by both ITAG and Atlas
Solyc01g067890	1-deoxy-D-xylulose 5-phosphate synthase 1 (AHRD V1 ***- C7U110_SOLLC); contains Interpro domain(s) IPR005474 Transketolase, N-terminal IPR005475 Transketolase, central region IPR005477 Deoxyxylulose-5-phosphate synthase	DXS1	At4g15560	NP_001234672.1 Paetzold et al (2010)	MALCAYAFPGILNRTGVVSDSSKATPLFSGWIHGTDLQFLFQHKLTHEVKKRSRVVQASLSESGEYYTQRPPTPILDTVNYPIHMKNLSLKELKQLADELRSDTIFNVSKTGGHLGSSLGVVELTVALHYVFNAPQDRILWDVGHQSYPHKILTGRRDKMSTLRQTDGLAGFTKRSESEYDCFGTGHSSTTISAGLGMAVGRDLKGRNNNVIAVIGDGAMTAGQAYEAMNNAGYLDSDMIVILNDNRQVSLPTATLDGPVAPVGALSSALSRLQSNRPLRELREVAKGVTKQIGGPMHELAAKVDEYARGMISGSGSTLFEELGLYYIGPVDGHNIDDLIAILKEVRSTKTTGPVLIHVVTEKGRGYPYAERAADKYHGVAKFDPATGKQFKASAKTQS…	7	14	7	1.565	0.0100919	682	5	3	8	'9.1.2.2'	'Secondary metabolism.terpenoids.methylerythritol phosphate (MEP) pathway.1-deoxy-D-xylulose 5-phosphate synthase *(DXS)'	'mercator4v5.0: 1-deoxy-D-xylulose 5-phosphate synthase *(DXS) & swissprot: Probable 1-deoxy-D-xylulose-5-phosphate synthase, chloroplastic & original description: 1-deoxy-D-xylulose 5-phosphate synthase 1 (AHRD V1 ***- C7U110_SOLLC); contains Interpro domain(s) IPR005474 Transketolase, N-terminal IPR005475 Transketolase, central region IPR005477 Deoxyxylulose-5-phosphate synthase'	-	4	-	none	Cp	Cp	99.6	plastid stroma	plastid	-	Cp	0.81	0	No	Detected by both ITAG and Atlas
Solyc01g068030	Cyclase/dehydrase (AHRD V1 ***- B6T2Z5_MAIZE); contains Interpro domain(s) IPR005031 Streptomyces cyclase/dehydrase	-	At4g01883	XP_025886530.1	MSAITAIPASTTMSATATSASASSSAHILRLNHKQLIFSLHGRRKSISASSSSFFSTYRFNSSISRSSRRISYPSSIRIRPLSPVMEWQDVTVKMEVDVPISVAYKCYSDREAIPEWMPFISTVKILEDKPDLSRWSLKYNAFGQNIEYSWLARNMQPTPNQKIHWRSLEGLPNRGAVRFFPKGPSSCIIELTVSYEVPQLLVPVASALKPFLENLLSQGLERFATFARIYSADTPK	6	30	2	3.125	0.0201516	450	5	3	8	'35.2'	'not assigned.not annotated'	'mercator4v5.0: not classified & original description: Cyclase/dehydrase (AHRD V1 ***- B6T2Z5_MAIZE); contains Interpro domain(s) IPR005031 Streptomyces cyclase/dehydrase'	Cp	1	Cp	Cp	Cp	Cp	100	plastid	plastid	-	Cp	0.94	0.02	No	Detected by both ITAG and Atlas
Solyc01g068290	tRNA uridine 5-carboxymethylaminomethyl modification enzyme mnmG (AHRD V1 ***- B4VZ14_9CYAN); contains Interpro domain(s) IPR004416 Glucose-inhibited division protein A	-	At2g13440	CAD5318421.1	MATVLSLNWTRFASQVPRSFSSPFLRKHSQFIRLYRSFQFSGSLCTLYSSSRRPFTVVASSSPSNGSSSYAEVGDERYDVIVVGGGHAGCEAALASARLGAKTLLLTLNIDRIAWQPCNPAVGGPAKSQLVHEVDALGGDIGKIADRCYLQKRVLNISRGPAVWALRAQTDKREYALEMKKIVESTPNLFIREAMVTDILLGKNDNVEGVCTFFGMNFYAPSVILTTGTFMSGKIWIGRTSMPAGRAGESASVGLTENLQRLGFETDRLKTGTPARVDSRTVDFSGLEPQYGDEEVSWFSFDANYHIEREQMCCYLTRTTKSTHQLIRDNLHETPTYGGWVEAKGPRYCPSIEDKIVRFQDKESHQIFLEPEGRSVPELYVQGFSTGLPERLQLPLLRT…	2	5	2	0.199	0.00128326	1125	3	0	3	'16.2.6.2.18'	'RNA processing.RNA modification.RNA methylation.tRNA methylation.MnmG-type 5,10-methylene-THF-dependent tRNA uridine methyltransferase'	'mercator4v5.0: MnmG-type 5,10-methylene-THF-dependent tRNA uridine methyltransferase & original description: tRNA uridine 5-carboxymethylaminomethyl modification enzyme mnmG (AHRD V1 ***- B4VZ14_9CYAN); contains Interpro domain(s) IPR004416 Glucose-inhibited division protein A'	Cp	4	Cp	Cp	Cp	M	90.1	-	plastid	-	Cp	0.89	0.01	No	Detected by both ITAG and Atlas
Solyc01g068470	Uncharacterized protein, CM0216.540.nc protein (Fragment) (AHRD V1 ***- B0BL99_LOTJA)	-	At2g38780	XP_010320706.1	MALIPHSQVFSSFSAINSLTNPFPKIFRTIKISASSSSSPNNSKDEQIVETDPVKLAFAKAKAYKKEIKPADSIAQNGVSVSEADDSDEKIALNSNTVIEGSNKENGENDFIKKENEKSDINALPKESVRKKEKLSISSIDFVGLGFSDNKKSRGLPAGLVPIVDSFPGGDLPDVEILVGDTSKFVDTETSKSSRIQEDDMDTYKPKVSTWGVFPRPNDISKTFGGGRTIRPGEVLESAEEKASKQARTRELLAAYKSRVGLTIDPNLKLECEQALKDGDSFMDLGNLKEALPFYEKVMNKLPFQTQLHGLAALQWSICQDSLRRSNEARSMYEKLQSHPNPGVSKKARQFMFSFQAMEMMKVTSSTFSSMNTGYQNYFDAFIRDKVNYSLKEDEAEDG…	1	1	1	0.129	0.000831859	1181	1	0	1	'35.2'	'not assigned.not annotated'	'mercator4v5.0: not classified & original description: CM0216.540.nc protein (Fragment) (AHRD V1 ***- B0BL99_LOTJA)'	Cp	3	Cp	Cp	Cp	Cp	86.8	-	-	-	Cp	0.96	0.01	No	Detected by both ITAG and Atlas
Solyc01g068620	Cyclase/dehydrase (AHRD V1 *-*- D7E269_NOSA0); contains Interpro domain(s) IPR005031 Streptomyces cyclase/dehydrase	-	At4g01650	XP_004229152.1	MQVQYQLWWHTITTSSLPLSSIFYRHEATAVAAARYRHDTALSTGAFSLRLNRNPNLTSGRFRLDTVTCSLDIGGNATIDEYDDGDTRNDTGEDGSDEEEEDGGVETEIEKMGKNRRRIRSKIVVKASLQSVWEVLTDYERLADFIPGLAVCQLLEKEPNFARLLQIGEQNLAFGLKFNAKGVIDCYEKDLEDLPTGQRRDIEFKMVEGDFKNFEGKWSIEQCKTGGDQELDSSLDEPFHTTLSYIVDVEPKLWLPVRLIEGRLCKEININLQSVRDEAQKVYLSSFSSY	5	17	5	2.162	0.0139417	558	4	2	6	'35.2'	'not assigned.not annotated'	'mercator4v5.0: not classified & original description: Cyclase/dehydrase (AHRD V1 *-*- D7E269_NOSA0); contains Interpro domain(s) IPR005031 Streptomyces cyclase/dehydrase'	M	4	Cp	none	Cp	Cp	42.1	plastid stroma	-	-	-	0.45	0	No	Detected by both ITAG and Atlas
Solyc01g073740	Citrate synthase (AHRD V1 ***- O24135_TOBAC); contains Interpro domain(s) IPR010109 Citrate synthase, eukaryotic	CSY4	At2g44350	XP_004229342.1	MVFYRSVSLLSKLRSRAVQQSNVSNSVRWLQVQTSSGLDLRSELQELIPEQQDRLKKIKSEYGKVQLGNITVDMVLGGMRGMTGLLWETSLLDPDEGIRFRGLSIPECQKVLPAAKPGGEPLPEGLLWLLLTGKVSAIKRASEFIVSGIAESGYYPWYVNHVYKTIDALPVTAHPMTQFATGVMALQVQSEFQKAYEKGIHKSKFWEPTYEDSMNLIAQVPLVAAYVYRRMYKNGDTIPKDESLDYGANFAHMLGFSSSEMHELMRLYVTIHSDHEGGNVSAHTGHLVASALSDPYLSFAAALNGLAGPLHGLANQEVLLWIKSVVEECGENISKEQLKDYVWKTLNSGKVVPGFGHGVLRKTDPRYTCQREFAMKHLPKDPLFQLVSKLYEVVPPVLT…	5	8	5	1.054	0.00679674	802	2	2	4	'2.3.1'	'Cellular respiration.tricarboxylic acid cycle.citrate synthase *(CSY4/5)'	'mercator4v5.0: citrate synthase *(CSY4/5) & swissprot: Citrate synthase, mitochondrial & original description: Citrate synthase (AHRD V1 ***- O24135_TOBAC); contains Interpro domain(s) IPR010109 Citrate synthase, eukaryotic'	M	2	Cp	M	Cp	M	96.2	-	mitochondrion	-	M	0	0	No	Detected by both ITAG and Atlas
Solyc01g079090	Protoporphyrinogen oxidase (AHRD V1 ***- O64384_SOLTU); contains Interpro domain(s) IPR004572 Protoporphyrinogen oxidase	PPO HEMG	At4g01690	NP_001335308.1	MTTTAVVNHPSIFTHRSPLPSPSSSSSSSPSFLFLNRTNFIPYFSTSKRSSVNCNGWRTRCSVAKNYTVPPSEVDGNQLPELDCVVVGAGISGLCIAKVISANYPNLMVTEARDRAGGNITTVERDGYLWEEGPNSFQPSDPMLTMAVDCGLKDDLVLGDPDAPRFVLWKDKLRPVPGKLTDLPFFDLMSIPGKLRAGFGAIGLRPSPPGYEESVEQFVRRNLGAEVFERLIEPFCSGVYAGDPSKLSMKAAFGKVWKLEQTGGSIIGGTFKAIKERSSNPKPPRDPRLPTPKGQTVGSFRKGLRMLPDAICERLGSKVKLSWKLSSITKSDKGGYLLTYETPEGVVSLRSRSIVMTVPSYVASNILRPLSVAAADALSSFYYPPVAAVTISYPQEAIR…	10	44	10	2.162	0.0139417	559	5	3	8	'7.13.4.3'	'Coenzyme metabolism.tetrapyrrole biosynthesis.protoporphyrin IX formation.protoporphyrinogen IX oxidase'	'mercator4v5.0: protoporphyrinogen IX oxidase & swissprot: Protoporphyrinogen oxidase, chloroplastic & original description: Protoporphyrinogen oxidase (AHRD V1 ***- O64384_SOLTU); contains Interpro domain(s) IPR004572 Protoporphyrinogen oxidase'	Cp	1	Cp	Cp	Cp	Cp	99.5	plastid	plastid	plp_at_00380; plp_at_01485	Cp	0.99	0	No	Detected by both ITAG and Atlas
Solyc01g079110	Histone H3 (AHRD V1 ***- D8L9K7_WHEAT); contains Interpro domain(s) IPR000164 Histone H3	H3-2 like	At4g40030	XP_004229367.1	MARTKQTARKSTGGKAPRKQLATKAARKSAPATGGVKKPHRFRPGTVALREIRKYQKSTELLIRKLPFQRLVREIAQDFKTDLRFQSSAVAALQEAAEAYLVGVFEDTNLCAIHAKRVTIMPKDIQLARRIRGERA	2	11	0	2.162	0.0139417	560	5	1	6	'12.1.1.3'	'Chromatin organisation.chromatin structure.DNA wrapping.histone *(H3)'	'mercator4v5.0: histone *(H3) & swissprot: Histone H3.2 & original description: Histone H3 (AHRD V1 ***- D8L9K7_WHEAT); contains Interpro domain(s) IPR000164 Histone H3'	Cp	3	Cp	none	Cp	N	100	-	-	-	-	0	0	No	Detected by both ITAG and Atlas
Solyc01g079220	NFU1-like; may be involved in iron-sulfur cluster assembly	NFU1	At4g01940	XP_004229373.1	MAHLAAMGVSQISSSIYMPELPLKSQNPQPSSIFLKRIGVAHKRFNLVKATVDGSPVPAPSPGLYSAKQFELTPENVDMVLEDVRPYLISDGGNVEVVSVEDGVVSLQLQGACESCPSATTTMKMGIERVLKEKFGEAIKDIRQVYNEQVVETTAEAVNAHLDILRPAIKNFGGSVEVLSVEEGNCNVKYVGPESIGSGVKAAIKEKFPDILNVVFTD	2	8	2	0.931	0.00600357	824	5	2	7	'7.12.1.2.2'	'Coenzyme metabolism.iron-sulfur cluster assembly machinery.plastidial SUF system.transfer phase.scaffold protein *(NFU1/2/3)'	'mercator4v5.0: scaffold protein NFU of plastidial SUF system transfer phase & swissprot: NifU-like protein 1, chloroplastic & original description: NifU like protein (AHRD V1 *-*- B8BR62_THAPS); contains Interpro domain(s) IPR001075 NIF system FeS cluster assembly, NifU, C-terminal'	Cp	3	Cp	Cp	Cp	Cp	96.7	plastid stroma	plastid	-	Cp	1	0	No	Detected by both ITAG and Atlas
Solyc01g079450	Probable glutamyl endopeptidase	cGEP AARE4	At2g47390	NP_004229392.1 Bhuiyan et al (2020) Walling (2006)	MYEAVAMSLPKVYHRFSLLSLHSTTSPILPKTLFFSSYSLRLAVKRLHSPPLLRPQSRRFVAGKRFQAKSTMASSRFHHLVPVNALTAEDGGNGTGSNGAADATASVAYDDDVESASATGYRLPPFEIRDIVDAPPLPALSFSPLRDKILFLKRRSLPPLSDLARPEEKLAGIRIDGKCNSRSRMSFYTGIAIHQLMEDGSLGPEKEIQGLPKGAKINFVMWSNNGQHLAFSVRLDEDDGSSSKLRVWVANVDTGKARPLFESPDVYVNAVFDNFVWVNDSTLLVCTIPLSRGDPPRKPLVPSGPKIQSNEQKNVIQARTYQDLLKDEYDEDLFEYYATTQLVLASLDGEMKPFGPPAIYTSMDPSPDQTYILISSTHKPFSFVVPCGRFPKKVELWKA…	15	82	15	3.03	0.019539	459	5	3	8	'19.4.2.10'	'Protein homeostasis.proteolysis.serine-type peptidase activities.S9-class plastidial glutamyl peptidase *(CGEP)'	'mercator4v5.0: S9-class plastidial glutamyl peptidase *(CGEP) & swissprot: Probable glutamyl endopeptidase, chloroplastic & original description: Peptidase S9 prolyl oligopeptidase active site domain protein (AHRD V1 ***- B4SK00_STRM5); contains Interpro domain(s) IPR001375 Peptidase S9, prolyl oligopeptidase active site region'	Cp	3	Cp	Cp	Cp	Cp	50.2	plastid stroma	plastid	plp_at_00238; plp_at_02522	Cp	0.93	0.02	No	Detected by both ITAG and Atlas
Solyc01g079470	CP12 (AHRD V1 ***- O24136_TOBAC); contains Interpro domain(s) IPR003823 Protein of unknown function CP12	CP12	At3g62410	XP_004229393.1	MATIAGVSLTSPKFLAKNSNSPNFKPFKLPCLNNPWKKSSTKFGLVCSAAPDNKLSDLVADSVKGAEETCNENPASGECAAAWDVVEEASAAASHARDKKKQEDVLENYCKENPETDECRTYDN	1	10	1	0.389	0.00250847	1024	5	3	8	'1.2.3.2'	'Photosynthesis.calvin cycle.glyceraldehyde 3-phosphate dehydrogenase (GAPDH) activity.regulatory protein *(CP12) of GAPDH activity'	'mercator4v5.0: regulatory protein *(CP12) of GAPDH activity & original description: CP12 (AHRD V1 ***- O24136_TOBAC); contains Interpro domain(s) IPR003823 Protein of unknown function CP12'	Cp	1	Cp	Cp	Cp	C	56.6	plastid stroma	plastid	plp_at_00368	Cp	1	0	No	Detected by both ITAG and Atlas
Solyc01g079680	Ran GTPase activating protein (Fragment) (AHRD V1 **-* A7M8K5_NICBE); contains Interpro domain(s) IPR003590 Leucine-rich repeat, ribonuclease inhibitor subtype	RanGAP2	At5g19320	NP_001334927.1	MDATTDNSQRRPFSIKLWPPSENTRKMLVERMTNNLSSPTIFTRKYRSLSKEEAAKNAEEIEDAAFTIANQHYEKEPDGDGSSAVQLYARECSKLILEILKKTPKSEDKEISISEVVPTVQETFFDISKGKRAFIEAEEAQELLKPLKEPGNSYSKICFSNRSFGIDAARIAGPILATLKDQLKEVDLSDFVAGRNEAEALDVMNIFSEALEGSNLKFLNLSDNALGEKGVRAFGKLLQSQTNLEELFLMNDGISQEAANAVSELVPSTEKLKILHFHNNMTGDEGAVAIAEIVKRSPLLEDFRCSSTRVGSEGGSALCEALGMCSHLKKLDLRDNMFGPEVGLVLSKALSQHENLKEIYLSYLNLEDEGAIAIANALKDSAPSLAVLEMAGNDITAEA…	17	42	17	5.31	0.0342416	303	5	1	6	'23.5.2.3.2'	'Protein translocation.nucleus.nucleocytoplasmic transport.RAN GTPase cycle.Ran-activating protein *(Ran-GAP)'	'mercator4v5.0: Ran-activating protein of nucleocytoplasmic transport & swissprot: RAN GTPase-activating protein 2 & original description: Ran GTPase activating protein (Fragment) (AHRD V1 **-* A7M8K5_NICBE); contains Interpro domain(s) IPR003590 Leucine-rich repeat, ribonuclease inhibitor subtype'	Cp	4	-	none	Cp	N	89	-	nucleus,cytosol	plp_at_00519	-	0	0	No	Detected by both ITAG and Atlas
Solyc01g079790	Glucose-1-phosphate adenylyltransferase large subunit, (AHRD V1 **** P93230_SOLLC); contains Interpro domain(s) IPR011831 Glucose-1-phosphate adenylyltransferase	APL1	At5g19220	NP_001233977.2	MSVATDGRFALLRNNPAALTGTNLKIVKFCNGELMGKKLKYTKFQLRSNVVKPNICMSLTTDIAGEAKLKDLEAKKEDARTVVAIILGGGAGTRLFPLTKRRAKPAVPIGGAYRLIDVPMSNCINSGINKVYILTQFNSASLNRHIARAYNFGNGVTFGDGYVEVLAATQTPGELGKRWFQGTADAVRQFHWLFEDARSKDIEDVLILSGDHLYRMDYLHFVQSHRQSGADITISSLPIDDSRASDFGLMKIDDTGRVMSFSEKPKGDDLKAMAVDTTVLGLSPEEAKEKPYIASMGVYVFKKDILLNLLRWRFPTANDFGSEIIPASTKEFCVKAYLFNDYWEDIGTIRSFFEANLALTEHPPRFSFYDATKPIYTSRRNLPPSAIDNSKIVDSIVSH…	26	293	24	21.638	0.139533	72	5	3	8	'3.2.2.3.1'	'Carbohydrate metabolism.starch metabolism.biosynthesis.ADP-glucose pyrophosphorylase complex.large subunit *(APL)'	'mercator4v5.0: large subunit of ADP-glucose pyrophosphorylase & swissprot: Glucose-1-phosphate adenylyltransferase large subunit 3, chloroplastic/amyloplastic & original description: Glucose-1-phosphate adenylyltransferase (AHRD V1 **** P93230_SOLLC); contains Interpro domain(s) IPR011831 Glucose-1-phosphate adenylyltransferase'	-	4	-	none	Cp	Cp	99.6	plastid stroma	plastid	plp_at_01562; plp_at_02606	-	0.37	0	No	Detected by both ITAG and Atlas
Solyc01g080140	Alpha-beta hydrolase super family	-	At5g19050	XP_004229445.1	MDLSTSASFSSSSSSSWFSGIVRGRSTSVKMSNKNPAAAAAAGGTDSVSGAGPITAKKQFRGVMFKYGPKAIQVAFKTGDYKQQLIFIGGLTDGFLATDYLEPLAIALDKEKWSLVQFLVSSSYSGYGTSSLRQDAMELDQLISYLINKEDSEGVVLLGHSTGCQDIVYYMRTNAACSRAVRAAILQAPVSDREYKATLPDTASMIDLASNMISEGRESELMPREANPDAPITAFRYHSLCAYNGEDDLFSSDFSDDQLKQKLGHMSNTPCQVIFSMGDEYVPDYVDKKALVDRLCKAMGGAEKVEIEYGNHSLSNRVVEAVEAIMSFVKREGPSGWDDPWN	1	1	1	0.233	0.0015025	1095	1	0	1	'35.2'	'not assigned.not annotated'	'mercator4v5.0: not classified & original description: Dolichol-phosphate mannosyltransferase (AHRD V1 **-- C0NU33_AJECG); contains Interpro domain(s) IPR013744 Protein of unknown function DUF1749'	Cp	2	Cp	possibly Cp	Cp	Cp	98.5	-	-	-	Cp	0.62	0	No	Detected by both ITAG and Atlas
Solyc01g080280	Glutamine synthetase (AHRD V1 ***- B5LAU9_CAPAN); contains Interpro domain(s) IPR008146 Glutamine synthetase, catalytic region	GS2	At5g35630	NP_001310598.1	MAQILAPSAQWQMRMTKSSTDASPLTSKMWSSVVLKQNKRHALKSSAKFRVFALQSDNGTVNRVEQLLNLDVTPYTDKIIAEYIWIGGTGIDMRSKSRTISKPVKDASELPKWNYDGSSTGQAPGEDSEVILYPQAIFKDPFRGGNNILVICDAYTPAGEPIPTNKRHKAAQIFSDPKVAAQVPWFGIEQEYTLLQPNVNWPLGWPVGGYPGPQGPYYCGAGAEKSFGRDISDAHYKACLYAGINISGTNGEVMPGQWEFQVGPSVGIEGGDHIWCARYLLERITEQAGVVLSLDPKPIEGDWNGAGCHTNYSTLSMREEGGFEVIKKAILNLSLRHKEHISAYGEGNERRLTGKHETASIDQFSWGVANRGCSIRVGRDTEKEGKGYLEDRRPASNMD…	14	472	14	62.096	0.400427	28	5	3	8	'25.1.4.1.2'	'Nutrient uptake.nitrogen assimilation.ammonium assimilation.glutamine synthetase activities.plastidial glutamine synthetase *(GLN2)'	'mercator4v5.0: plastidial glutamine synthetase *(GLN2) & swissprot: Glutamine synthetase, chloroplastic & original description: Glutamine synthetase (AHRD V1 ***- B5LAU9_CAPAN); contains Interpro domain(s) IPR008146 Glutamine synthetase, catalytic region'	Cp	2	Cp	Cp	Cp	Cp	91.8	plastid stroma	plastid	plp_at_00541; plp_at_01578; plp_at_01897; plp_at_02354	Cp	0.69	0.01	No	Detected by both ITAG and Atlas
Solyc01g080460	Pyruvate phosphate dikinase (AHRD V1 ***- Q84N32_SORBI); contains Interpro domain(s) IPR010121 Pyruvate, phosphate dikinase	PPDK	At4g15530	XP_010322950.1	MSSTMKGLLLKPNTNNMYMTKLLKHKYAEEQFLAKYSSFGIHMNCSKWSSKVIRCHQQEPNGFSNSPVTPIRKQTPPPQAILSPVSETTSTAKKRVYTFGKGRSEGNKGMKSLLGGKGANLAEMASIGLSVPPGLTISTEACQEYQIAKKLPQGLWEEILQGLEVVEKDMGAFLGNPSKPLLLSVRSGAAISMPGMMDTVLNLGLNDEVVTGLAAKSGERFAYDSYRRFLDMFGDVVMGISHSLFAEKLEKLKDAKGVKLDTELTASDLKQLVEQYKNVYVEAKGEKFPSDPKRQLELAIKAVFDSWDSPRANKYRSINQITGLKGTAVNIQCMVFGNMGNTSGTGVLFTRNPSTGEKKLYGEFLINAQGEDVVAGIRTPQDLETMKECMPEAYKELVE…	22	77	22	3.642	0.0234855	397	5	3	8	'3.10.2.1'	'Carbohydrate metabolism.gluconeogenesis.pyruvate orthophosphate dikinase activity.pyruvate orthophosphate dikinase'	'mercator4v5.0: pyruvate orthophosphate dikinase & swissprot: Pyruvate, phosphate dikinase, chloroplastic & original description: Pyruvate phosphate dikinase (AHRD V1 ***- Q84N32_SORBI); contains Interpro domain(s) IPR010121 Pyruvate, phosphate dikinase'	-	3	-	possibly M	Cp	Cp	99.6	plastid stroma	plastid,cytosol	plp_at_00415; plp_at_02545	-	0.43	0.02	No	Detected by both ITAG and Atlas
Solyc01g080810	Isoleucyl-tRNA synthetase (AHRD V1 ***- Q9FI67_ARATH); contains Interpro domain(s) IPR002301 Isoleucyl-tRNA synthetase, class Ia IPR018353 Isoleucyl-tRNA synthetase	IIeRS	At5g49030	XP_004229502.1	MEATFFPKRITASKSLVFALARAKMAMQTSSYKLWSLKSCSSLREPTSVSLLNLRSSSSARVFSLMNMTRYSTYSNDDSCPSGKRRSRGPVMAAKKRSEGAKQDDGKYKDTVDLPKTAFGLRANSTVREPELQKIWDDNQVFKRVVERNNGGTFVLHDGPPYANGDLHMGHALNKILKDIINRYKLLQNFRVQYVPGWDCHGLPIELKVLQSLDDDARKELTPLKLRNKAAKFAKSTVQSQMASFKRYGVWADWDQHYLTLHPEYEAAQIEVFGQMAIQGFIYRGRKPVHWSPSSRTALAEAELEYNEEHVSKSMYAIFRLVGVPASCDSLKEFLPNLCLAIWTTTPWTIPANAAVAVNNKLQYAVVEVSSASVDGSTSSVDGKKRFGNFMKGDKSLHL…	24	91	24	2.286	0.0147413	553	5	3	8	'17.2.11'	'Protein biosynthesis.aminoacyl-tRNA synthetase activities.isoleucine-tRNA ligase'	'mercator4v5.0: isoleucine-tRNA ligase & swissprot: Isoleucine--tRNA ligase, chloroplastic/mitochondrial & original description: Isoleucyl-tRNA synthetase (AHRD V1 ***- Q9FI67_ARATH); contains Interpro domain(s) IPR002301 Isoleucyl-tRNA synthetase, class Ia IPR018353 Isoleucyl-tRNA synthetase'	Cp	4	Cp	Cp	Cp	M	78.6	plastid stroma	plastid	plp_at_00562	M	0.12	0	No	Atlas only
Solyc01g080840	Protein translocase subunit secA (AHRD V1 ***- B9I9A8_POPTR); contains Interpro domain(s) IPR000185 SecA protein	SECA1	At4g01800	XP_010323109.1	MELVFSPPSVDWPATAGGRSSSLANRRSTANEKVRGLIGTRSWLRGGEESLRLLGLELKKTRRRRMMTPEASLGGLLGGIFKSSDSGESTRQMYAATVTLINGMESMVSSLSDSQLREKTAALQERARRGDSLDSLLPEAFAIVREASKRVLGLRPFDVQLIGGMVLHKGEIAEMRTGEGKTLVAILPAYLNALTGKGVHVVTVNDYLARRDCEWVGQVPRFLGLKVGLIQQNMTSEQRRENYMCDITYVTNSELGFDYLRDNLSVDELVVRNFNYCVIDEVDSILIDEARTPLIISGPAEKPSDQYYKAAKVAAAFERAIHYTVDEKQKNVLLTEQGYADAEEILDVKDLYDPRQQWASYILNAIKAKELFLKDVNYIIRGKEVLIVDEFTGRVMQGR…	30	124	29	3.458	0.022299	419	5	3	8	'23.1.5.1'	'Protein translocation.chloroplast.thylakoid membrane Sec1 translocation system.component *(SecA1)'	'mercator4v5.0: component *(SecA1) of thylakoid membrane Sec1 translocation system & swissprot: Protein translocase subunit SECA1, chloroplastic & original description: Protein translocase subunit secA (AHRD V1 ***- B9I9A8_POPTR); contains Interpro domain(s) IPR000185 SecA protein'	Cp	2	Cp	none	Cp	N	77.4	thylakoid-peripheral-stromal-side; plastid stroma	plastid	plp_at_00381; plp_at_01486	-	0	0	No	Atlas only
Solyc01g081290	Pentatricopeptide repeat-containing protein similar to At3g03580 (AHRD V1 ***- D7L173_ARALY); contains Interpro domain(s) IPR002290 Serine/threonine protein kinase	-	At4g18750	XP_004229586.1	MWNSIRDSGSSMSNLKTRFSLEECSRRLKKRCKEDDGLCCEVTVGSCGSRTRLAATAPPSGSSSISLCGRGVKRKIGCIEAATQMGRKNKIEDDYVMGEALGKGKFGSVFLCRSKATGVEFACKTLPKGEETVHKEVEIMQHLSGHPGVVTLHSVYEDAESFHLVMELCSGGRLIDEMTKEGRYSEQKSANIFKDLMLVIQYCHDMGVVHRDIKPENILLTASGKIKLADFGLAMRIANGQSLSGLAGSPAYVAPEVLTGDYGQKADIWSAGVLLHGLLVGVLPFQGDSLDALFEAIKSMQLDFHTEKWQSVSKLARDLLERILTRDVAARITAEEVLSHPWMMFYTERTLKMVSVRLKPKHFSGTPSQIPAITSRLESDGKKRCCKSLNGETNDLRCG…	1	2	1	0.038	0.000245044	1245	2	1	3	'16.6.2.2.5.35'	'RNA processing.organelle machinery.RNA modification.C-to-U RNA editing.PPR-type RNA editing factor activities.RNA editing factor *(MEF26)'	'mercator4v5.0: RNA editing factor *(MEF26) & swissprot: Pentatricopeptide repeat-containing protein At3g03580 & original description: Pentatricopeptide repeat-containing protein (AHRD V1 ***- D7L173_ARALY); contains Interpro domain(s) IPR002290 Serine/threonine protein kinase'	Cp	4	-	possibly Cp	Cp	C	100	plastid	plastid	-	-	0	0	No	Detected by both ITAG and Atlas
Solyc01g081300	Phosphoribosylaminoimidazole-succinocarboxamide synthase (AHRD V1 **** Q6T7F0_TOBAC); contains Interpro domain(s) IPR001636 SAICAR synthetase	PUR7	At3g21110	XP_004229526.1	MALPALNPPKTLNKKLQSLNSPFFSFSKTASFPKITKCKKYPLITMSSQQQSPPPHVALTNNDHKEELMRAIKSSITNCLSETHLDLTVPQLKSKIRGKVRDIYDGGDYLVMVTTDRQSAFDRILASIPFKGQVLNETSLWWFNKTQHITPNAVVSVPDKNVTIARKCSVFPVEFVVRGYVTGSTDTSLWTVYNKGVRNYCGNNLPDGLVKNQKLTENILTPTTKAADHDVPVTPDEIVQRGLMTQADYDEVSRRAMSLFEFGQHVALDHGLILVDTKYEFGKGPDGQIYLIDEVHTPDSSRYWIAHSYQERIQNGLEPENIDKEFLRLWFKSHCNPYEDEVLPDAPEELVSELAWRYIFLFETITNSRFEMPETKEPVHDRISRNVSQALSSLQ	10	24	10	2.728	0.0175916	487	5	3	8	'6.1.1.7'	'Nucleotide metabolism.purines.ribonucleotide (RN) anabolism.succino-aminoimidazole-carboximide RN synthetase *(PUR7)'	'mercator4v5.0: succino-aminoimidazole-carboximide RN synthetase *(PUR7) & swissprot: Phosphoribosylaminoimidazole-succinocarboxamide synthase, chloroplastic & original description: Phosphoribosylaminoimidazole-succinocarboxamide synthase (AHRD V1 **** Q6T7F0_TOBAC); contains Interpro domain(s) IPR001636 SAICAR synthetase'	Cp	3	Cp	Cp	not Cp	Cp	100	plastid stroma	plastid	-	Cp	0.95	0	No	Detected by both ITAG and Atlas
Solyc01g081480	Alpha-beta hydrolase super family	-	At5g17670	XP_004229542.1	MNVVAWLSPCTTISSPNIFSCCSAISCQAESSLTTTTATAIRPAVILPGLGNNTNDYEKLALILKGYGVPTAIAKVSRIDWLRNAAGLLDTNYWRGTLQPRPVLDWYLKRIDEAVSEAKELAQGESGTLSLIGHSAGGWLARVYLQEFGSSDISLLLTLGTPHLPPPKGLPGVIDQTRGLLYYVEKNCGKAVYSPELRYVCIAGRYIQGSRFFDSSSTYSSEVMDGAEQPMSEVAAVSNTNAETETGSTFRTRFVGQGYKQVCGQADVWGDGVVPEVSAHLKGALNVTLEGVYHSPVGSDDATRPWYGSPAVVEQWIRHLLV	2	6	2	0.52	0.00335323	975	4	3	7	'35.2'	'not assigned.not annotated'	'mercator4v5.0: not classified & original description: Genomic DNA chromosome 5 P1 clone MVA3 (AHRD V1 **-- Q9FN84_ARATH)'	S	4	Cp	possibly Cp	Cp	Cp	98.2	envelope	plastid	plp_at_00518; plp_at_01559	Cp	0.73	0.05	No	Detected by both ITAG and Atlas
Solyc01g086900	RNA methyltransferase TrmH group 2 (AHRD V1 *-*- Q3M884_AVT); contains Interpro domain(s) IPR001537 tRNA/rRNA methyltransferase, SpoU; tRNA (cytidine(34)-2'-O)-methyltransferase (based on NCBI blast)	-	At5g26880	XP_004229609.1	MERAGLKTLNTVVSPLHFRAKASIFRPLLLPQVVHNLHFPLLSSSSRLSPLRSLCVRSDASTMLNGAGGVAAQNKLLQVVLVSPQIPGNTGSIARTCAASAVGLHLVEPLGFPIDNTKLKRAGLDYWPYVVVKVHRSWDEFREYFMGQAGEKRLLAFTKRGIATHSDFSYKKGDWLVFGSETKGLPPEALLDCKSESLGGGTLRIPMVETYVRCLNLSVSVGIAVYEASRQINYEQLQCPPDTCMDTETSFVTEDIFA	2	5	2	0.468	0.00301791	989	5	1	6	'16.2.6.2.17'	'RNA processing.RNA modification.RNA methylation.tRNA methylation.TrmL-type tRNA methyltransferase'	'mercator4v5.0: TrmL-type tRNA methyltransferase & original description: RNA methyltransferase TrmH group 2 (AHRD V1 *-*- Q3M884_ANAVT); contains Interpro domain(s) IPR001537 tRNA/rRNA methyltransferase, SpoU'	M	4	Cp	Cp	Cp	Cp	77.4	-	-	-	Cp	0.52	0.01	No	Detected by both ITAG and Atlas
Solyc01g087040	Thylakoid lumenal 19 kDa protein, chloroplastic (AHRD V1 ***- TL19_ARATH); contains Interpro domain(s) IPR016123 Mog1/PsbP, alpha/beta/alpha sandwich	TL19	At3g63540	XP_004229619.1	MASILHPSSLLSSSSSTTTTTTKPPVSPPFSRPQSTLSPPSKPLLTTLTATAIATTILTTSLPSLADSPSSFNIYYGTAASAANYGGYGGNSDKKASAEYIYDVPDGWKERLVSKVEKGTNGTDSEFYNPKKKSEKEYLTYLAGFRQLAPKDVILNNLALSDVNLQDLIANADGVTSEERKDENGQLYYDYEIDGVLGHSLISVTCANNKLYAHFVNAPAPEWKKDEGILRHVHQSFKTVG	9	122	9	315.228	2.03275	7	5	3	8	'35.1'	'not assigned.annotated'	'mercator4v5.0: not classified & swissprot: Thylakoid lumenal 19 kDa protein, chloroplastic & original description: Thylakoid lumenal 19 kDa protein, chloroplastic (AHRD V1 ***- TL19_ARATH); contains Interpro domain(s) IPR016123 Mog1/PsbP, alpha/beta/alpha sandwich'	Cp	1	Cp	Cp	Cp	Cp	93.9	-	plastid	-	Cp	0.62	0.37	Yes	Detected by both ITAG and Atlas
Solyc01g087190	Chaperonin-like RbcX protein 2, chloroplastic	RBCX2	At5g19855	XP_004229629.1	MVGTISGSGRSLAETHSTPCLCLNPSRNSGSTNFRSNRELGLWRTFKGRKQLNLSSSFLEAWCEWRLSAKMVSLALNGGSRKRQKIRKLTVVGGLEVEDDDSGEDVKNEIINVITYKAVRTVLQQLYEMNPPQYTWFYNFIVNHVPNTGKNFLQQLFKEKRELAERVMITRLSLYSIWMQKCDHAELYNRISDENVELMRERLAQTVIWPSDDDQIAGSLD	2	7	2	0.468	0.00301791	990	4	3	7	'1.2.1.2.4'	'Photosynthesis.calvin cycle.ribulose-1,5-bisphosphat carboxylase/oxygenase (RuBisCo) activity.RuBisCo assembly.assembly factor *(RbcX)'	'mercator4v5.0: assembly factor involved in RuBisCo assembly *(RbcX) & swissprot: Chaperonin-like RbcX protein 2, chloroplastic & original description: Chaperonin-like protein (AHRD V1 *-*- Q2LJI6_9NOSO); contains Interpro domain(s) IPR003435 Chaperonin-like RbcX'	Cp	2	Cp	possibly Cp	Cp	N	49.1	plastid stroma	plastid	-	-	0.49	0	No	Detected by both ITAG and Atlas
Solyc01g087520	Ferredoxin-thioredoxin reductase variable chain (AHRD V1 *-*- B6UCW8_MAIZE); contains Interpro domain(s) IPR004207 ferredoxin thioredoxin reductase, alpha chain	FTRA	At5g23440	XP_004229646.1	MTASTSAFFSSSVLNIPNSKNQSLIIPSHKNILNPNPFPQIKIHKSRNPQKPNGYFISKSVIVDNPSTVSSTSSLSVDAGVDEKDAAAMGKVGSKVRVTVPLKVYHVPKVPELDLDGRTGTVKQYVAVHKGKQISANLPYKVEFVVDDLEGRSTPVKFSAHLKEDEFEFLD	5	12	5	1.61	0.0103821	669	5	1	6	'10.3.1.2.1'	'Redox homeostasis.thiol-based redox regulation.thioredoxin reductase activities.ferredoxin-dependent thioredoxin reductase (FTR) complex.subunit alpha'	'mercator4v5.0: subunit alpha of ferredoxin-dependent thioredoxin reductase (FTR) complex & swissprot: Ferredoxin-thioredoxin reductase, variable chain & original description: Ferredoxin-thioredoxin reductase variable chain (AHRD V1 *-*- B6UCW8_MAIZE); contains Interpro domain(s) IPR004207 Ferredoxin thioredoxin reductase, alpha chain'	Cp	1	Cp	Cp	Cp	Cp	100	plastid stroma	plastid	-	Cp	0.98	0.01	No	Detected by both ITAG and Atlas
Solyc01g087730	50S ribosomal protein L1 (AHRD V1 ***- A8YGI8_MICAE); contains Interpro domain(s) IPR005878 Ribosomal protein L1, bacterial-type	RPL1	At3g63490	XP_004229660.1	MASTATPSTLTLSSIFSQELNPNSLIFKSKPLLFTSHKSFSLHPLSLQYKERKNGPLVVAAMAAEAEVEDAVEQEGEEGAVAVLIPPSKPKKGKAALPLKRDRTRSKRFLEIQKLREIKKEYDLKTAIELLKQTASLKFVETAEAHFRLNIDPKYNDQQLRATVNLPKGTGQTVKVAVLTQGEKFDEAKNAGADIVGGEDLIEQIKGGFMEFDKLIATPDMMPKVASLGRVLGPRGLMPNPKAGTVTTNIPQAIEEFKKGKVEYRADKTGIVHLPFGKANFSEEDLIINFIAAVKSVEANKPSGAKGVYWKSAHVCSSMGPSIRLNVREMLEYKLPNA	10	38	10	3.489	0.0224989	416	5	3	8	'17.6.2.2.1'	'Protein biosynthesis.organelle machinery.plastidial ribosome biogenesis.large ribosomal subunit proteome.component *(uL1c)'	'mercator4v5.0: component *(uL1c) of large plastid ribosomal-subunit proteome & swissprot: 50S ribosomal protein L1, chloroplastic & original description: 50S ribosomal protein L1 (AHRD V1 ***- A8YGI8_MICAE); contains Interpro domain(s) IPR005878 Ribosomal protein L1, bacterial-type'	Cp	2	Cp	possibly Cp	Cp	Cp	99.6	plastid ribosome	plastid	plp_at_00373; plp_at_01836; plp_at_02541	Cp	1	0	No	Detected by both ITAG and Atlas
Solyc01g087750	RETICULATA-RELATED 4, (NCBI); Homology to unknown gene (Fragment) (AHRD V1 ***- Q015C3_OSTTA) [PREDICTED: protein RETICULATA-RELATED 4, chloroplastic]	RER4	At5g12470	XP_004229662.1	MAAIATATTTFYLSTTSFSRHQSSTFRFSSLTYPINFSTFSLNAQFHPPRTSFPIFSALSNHHGGGNIDGGGGGGGGGGGDGGGKDDENAGERNKKEAIMALAEAERTLESLPKDLASAIEAGKIPPAVVHRFLELEKSPVLRWLLSFGGFRERLLADDLFLTKVAIECGIGIFTKSAAELEKRRENFTKELDFVCADVVMAIVADFMLVWLPAPTVGLRPSLAIGSGPLTKLFYNCPDNAFQVVLSGTSYSFLQRLGAIVRNGAKLFAVGSGASLVGTGVTNTLINARKAIDKTFAGEAENLPVLSSSAAYGVYMAVSSNLRYQILAGVIEQRILEPLLHKNKIMLGALCFVFRTGNTFLGSLMWVDFARWIGIQRSRE	1	2	1	0.145	0.000935035	1173	2	3	5	'35.1'	'not assigned.annotated'	'mercator4v5.0: not classified & swissprot: Protein RETICULATA-RELATED 4, chloroplastic & original description: Homology to unknown gene (Fragment) (AHRD V1 ***- Q015C3_OSTTA)'	Cp	2	Cp	Cp	Cp	Cp	99.9	envelope-inner-integral	plastid	plp_at_00504; plp_at_01118; plp_at_01546	Cp	0.99	0	No	Detected by both ITAG and Atlas
Solyc01g088610	Chaperonin Cpn 10 - GroES (AHRD V1 ***- B5IMI3_9CHRO); contains Interpro domain(s) IPR001476 Chaperonin Cpn10	CPN10 GroES	At3g60210	XP_004229710.1	MASTFLTLAKPFTSHSTNLPSFSPQRPIGLRRNSLRINAISQKWEPTKVVPQADRVLIRLEELPEKSAGGVLLPKSAVKFERYLMGEVLSVGSDVAQVETGKKVLFSDINAYEVDLGTDARHCFCKESELLALVE	4	37	4	5.813	0.0374852	281	5	3	8	'1.2.1.2.3'	'Photosynthesis.calvin cycle.ribulose-1,5-bisphosphat carboxylase/oxygenase (RuBisCo) activity.RuBisCo assembly.auxiliary co-chaperone *(CPN10)'	'mercator4v5.0: auxiliary co-chaperone involved in RuBisCo assembly *(CPN10) & swissprot: 10 kDa chaperonin 1, chloroplastic & original description: chaperonin (AHRD V1 ***- B5IMI3_9CHRO); contains Interpro domain(s) IPR001476 Chaperonin Cpn10'	Cp	1	Cp	Cp	Cp	Cp	100	plastid stroma	-	-	Cp	1	0	No	ITAG only
Solyc01g089870	RNA-binding protein similar to At1g01250. Pentatricopeptide repeat-containing protein (AHRD V1 ***- D7KP29_ARALY); contains Interpro domain(s) IPR002885 Pentatricopeptide repeat	-	At1g02150	XP_004229730.1	MLLQPTTTVKPPHQKTEKYVSFSSSLSYSLSFPSGFCNLGGFTKPLMCSKNHHSVISCSSTSQVHSYGTVDYERRPIVKWNAIYKRISMNDGPERGSVSVLNQWENEGKKVTKWELSRVIKELRKFRRYKLAFEVYEWMNNRPERFRLTTSDTAIQLDLIAKVHGISSAEEYFDKLPDTLKDKRIYGSLLNAFVRSRKKEQAESLLDKMRNRGYTDHALPFNVMMTLYMNLKDYDKVESVVSEMKEKRIPLDIYSYNIWLSSCGSQGSIEKMEKVLEQMNLDTDINPNWTTFSTMATMYIKLGQMKKAEDSLKSVESRITGRDRIPYHYLISLYGSLGKKEDVLRIWKTYQSQFPNIPNLGYHSVISSLVRLDDIEGAEKIYDEWLPVKVHYDPRIGNL…	11	40	11	2.831	0.0182558	479	5	3	8	'16.6.1.1.17'	'RNA processing.organelle machinery.pre-RNA splicing.plastidial RNA splicing.splicing factor *(CRR16)'	'mercator4v5.0: splicing factor *(CRR16) & swissprot: Pentatricopeptide repeat-containing protein At1g02150 & original description: Pentatricopeptide repeat-containing protein (AHRD V1 ***- D7KP29_ARALY); contains Interpro domain(s) IPR002885 Pentatricopeptide repeat'	Cp	4	Cp	none	Cp	C	89.5	plastid	plastid	-	Cp	0.76	0	No	Detected by both ITAG and Atlas
Solyc01g089970	Nucleoside diphosphate kinase IPR001564 Nucleoside diphosphate kinase, core	NDK1	At4g09320	NP_001234174.2	MEQTFIMIKPDGVQRGLVGEIISRFEKKGFSLKGLKLITVDRAFAEKHYADLSAKPFFNGLVEYIVSGPVVAMVWEGKGVVATGRKIIGATNPLESAAGTIRGDFAIDIGRNVIHGSDAVESARKEIALWFPEGIAEWQSSLHSWIYE	6	18	4	9	0.0580367	162	5	3	8	'6.3.2.4'	'Nucleotide metabolism.deoxynucleotides.salvage pathway.nucleoside diphosphate kinase'	'mercator4v5.0: nucleoside diphosphate kinase & swissprot: Nucleoside diphosphate kinase & original description: Nucleoside diphosphate kinase (AHRD V1 ***- Q3Y5A4_SOLCH); contains Interpro domain(s) IPR001564 Nucleoside diphosphate kinase, core'	-	1	-	none	Cp	C	86.91	-	cytosol	-	-	0	0	No	Detected by both ITAG and Atlas
Solyc01g090200	Glycyl-tRNA synthetase beta subunit (AHRD V1 ***- D2PQC6_KRIFD); contains Interpro domain(s) IPR002311 Glycyl-tRNA synthetase, class IIc, beta subunit, N-terminal	GlyRS	At3g48110	XP_004229742.1	MAILVLPLITSILKPHKTHFSFLPLPIILHRRFFSKSSTVSALSTSSSSSHVSHNSENQKKASVPTFQQAIQRLQEYWGSVGCAVMQCSNTEVGAGTMNPLTYLRVLGPEPWNVAYVEPSIRPDDSRYGENPNRLQRHTQFQVILKPDPGNSQDLFIRSLSALGIDVNAHDIRFVEDNWESPVLGAWGLGWEVWMDGMEITQFTYFQQAGSIQLMPVSVEITYGLERILMSLQGVDHFKKIQYADGITYGELFLENEKEMSAYYLEHASVDHIHKHFDLFEAEARRLLDLGLAIPAYDQLLKTSHAFNVLDSRGFVGVTERARYFGRMRSLARQCAQLWLQTRESLGHPLGVVSHSDHLIVQREVSEEATGKVPSEPRLFVLEIGTEELPPNDVSSACK…	30	174	30	8.067	0.0520202	201	5	3	8	'17.2.9'	'Protein biosynthesis.aminoacyl-tRNA synthetase activities.glycine-tRNA ligase'	'mercator4v5.0: glycine-tRNA ligase & swissprot: Glycine--tRNA ligase, chloroplastic/mitochondrial 2 & original description: Glycyl-tRNA synthetase beta subunit (AHRD V1 ***- D2PQC6_KRIFD); contains Interpro domain(s) IPR002311 Glycyl-tRNA synthetase, class IIc, beta subunit, N-terminal'	Cp	2	Cp	possibly Cp	Cp	G	66.2	plastid stroma; mitochondria	plastid	plp_at_00324; plp_at_02533	Cp	0.37	0.18	No	Detected by both ITAG and Atlas
Solyc01g090670	Nuclear pore glycoprotein p62 (AHRD V1 *--- C0HBQ2_SALSA); contains Interpro domain(s) IPR007758 Nucleoporin, Nsp1-like, C-terminal	-	At2g45000	NP_001332778.1	MSTGFSFSSSTSPFSFSSNPSFTTTPSVAATTSASGSSPFSSPFANPNPTSSTPSFGFGTSTTSASSAPSFGFGSSTTSASSAPSFGFGSSTTSASSAPSFGFGSNTGASTPSFGFSSSAASGSSPQPTLFGSSSGSTTSASGSPLFGANSASAAANSSPFGSSLFGSSGTPSPGLFGSSSAAASNSGLGLFDSSPFLSSTTASTGNAASSASTTPFSSSLFVSSSSASSSPFGSSSTAPSFGFPSSAASLSFQSASNSASSSPGLSFASSAAASSFSSSSAFSFPGASPASSASSAPGFSLLSTSTTTSISSAPGFSLAAASTSSAVSSPAFSFSTSSSAASGPAISLSTPTPSAASPAPSFSFSMPAAASSSPSPFSASSSPSPFSVAKGTVSSVTA…	1	1	1	0.166	0.00107045	1146	1	0	1	'23.5.1.6.2'	'Protein translocation.nucleus.nuclear pore complex (NPC).central subcomplex.nucleoporin *(NUP62)'	'mercator4v5.0: nucleoporin of nuclear pore complex *(NUP62) & swissprot: Nuclear pore complex protein NUP62 & original description: Nuclear pore glycoprotein p62 (AHRD V1 *--- C0HBQ2_SALSA); contains Interpro domain(s) IPR007758 Nucleoporin, Nsp1-like, C-terminal'	Cp	1	Cp	Cp	Cp	N	98.3	-	-	-	-	0	0	No	Detected by both ITAG and Atlas
Solyc01g091190	3-phosphoshikimate 1-carboxyvinyltransferase (AHRD V1 ***- Q30CZ8_FAGSY); contains Interpro domain(s) IPR001986 3-phosphoshikimate 1-carboxyvinyltransferase, core	-	At2g45300	NP_001295876.1	MAQISSMAQGIQTLSLNSSNLSKTQKGPLVSNSLFFGSKKVTQISAKSLGVFKKDSVLRVVRKSSFRISASVATAEKPHEIVLEPIKDISGTVKLPGSKSLSNRILLLAALSEGRTVVDNLLSSDDIHYMLGALKTLGLHVEDDNENQRAIVEGCGGQFPVGKKSEEEIQLFLGNAGTAMRPLTAAVTVAGGHSRYVLDGVPRMRERPIGDLVDGLKQLGAEVDCSLGTNCPPVRIVSKGGLPGGKVKLSGSISSQYLTALLMAAPLALGDVEIEIIDKLISVPYVEMTLKLMERFGVFVEHSSGWDRFLVKGGQKYKSPGKAFVEGDASSASYFLAGAAVTGGTVTVEGCGTSSLQGDVKFAEVLEKMGAEVTWTENSVTVKGPPRNSSGMKHLRAID…	11	55	7	3.642	0.0234855	398	5	3	8	'4.5.1.5'	'Amino acid metabolism.shikimate group amino acid biosynthesis.shikimate pathway.5-enolpyruvyl-shikimate 3-phosphate (EPSP) synthase'	'mercator4v5.0: 5-enolpyruvyl-shikimate 3-phosphate (EPSP) synthase & swissprot: 3-phosphoshikimate 1-carboxyvinyltransferase, chloroplastic & original description: 3-phosphoshikimate 1-carboxyvinyltransferase (AHRD V1 ***- Q30CZ8_FAGSY); contains Interpro domain(s) IPR001986 3-phosphoshikimate 1-carboxyvinyltransferase, core'	Cp	1	Cp	Cp	Cp	Cp	100	stroma	plastid	-	Cp	1	0	No	Detected by both ITAG and Atlas
Solyc01g091580	signal recognition particle-docking protein FtsY (AHRD V1 ***- A7H885_ADF); contains Interpro domain(s) IPR004390 Cell division transporter substrate-binding protein FtsY	FtsY	At2g45770	XP_004229830.1	MASTLSSRLPRLPSKTVFPHSNSGSTLLHFTSKTRFDQSRFRCSAGQTGFFTKLGRLLKEKAKSDVEKLFSGFSKTRDNLAVIDELLLYWNLSDTDRVLDELEEVLLVADFGPKITIKIVESLREDIYAGKIKSGSEIKSVLKKSILDLLTSKAPKTELSLGFRKPAVIMIVGVNGGGKTTSLGKLANRLKREGAKILLAAGDTFRAAASDQLEIWAERTGCEIVVAEKEKAKASSVISQAVKRGKEEGFDIVLCDTSGRLHTNYSLMEELVACKKVVSKIVNGAPNEILLVLDGTTGLNMLPQAREFNEVVGITGLILTKLDGSARGGCVVSVVDELGIPVKFVGVGEGVDDLQPFNAEEFVDAIFP	4	9	4	0.551	0.00355313	968	5	2	7	'23.1.7.4'	'Protein translocation.chloroplast.thylakoid membrane SRP insertion system.SRP receptor protein *(cpFtsY))'	'mercator4v5.0: component *(cpFtsY) of thylakoid membrane SRP insertion system & swissprot: Cell division protein FtsY homolog, chloroplastic & original description: Signal recognition particle-docking protein FtsY (AHRD V1 ***- A7H885_ANADF); contains Interpro domain(s) IPR004390 Cell division transporter substrate-binding protein FtsY'	Cp	4	Cp	Cp	Cp	C	94.3	thylakoid-peripheral-stromal-side	plastid	-	Cp	0.84	0.07	No	Detected by both ITAG and Atlas
Solyc01g091780	protein-ribulosamine 3-kinase	-	At3g61080	XP_004229852.1	MAVALLGSISFSSSMPSISSPSLQHPFNFNKHKPLIVAAMSDDPVREWILSEGKATKIKGISPIGGGCINRATRYDTDAGSFFVKTNRSIGPSMFEGEALSLNAMYETGSIRVPKPYKVGSLPTGGSYIIMEFIEFGASRGNQSALGRKLAEMHKAAKSEKGFGFHVDNTIGSTPQINTWMSDWVEFFAEHRLGYQLKMAREQYGDPIIYERGQRLARNLGPLFKNVVIEPCLLHGDLWSGNMTYDKNGEPVILDPACYYGHNEAEFGMSWCAGFGGDFYKAYFEVMPEQPGFEERRDLYMLYHYLNHYNLFGSGYRSSAMSIIDDYLRMLNV	4	12	4	1.154	0.00744159	763	5	3	8	'35.1'	'not assigned.annotated'	'mercator4v5.0: not classified & swissprot: Protein-ribulosamine 3-kinase, chloroplastic & original description: Fructosamine kinase family protein (AHRD V1 ***- D7LS54_ARALY); contains Interpro domain(s) IPR016477 Fructosamine/Ketosamine-3-kinase'	Cp	3	Cp	Cp	Cp	Cp	99	plastid stroma	plastid	-	Cp	1	0	No	Detected by both ITAG and Atlas
Solyc01g094280	FolD 4 bifunctional protein (AHRD V1 ***- B6TJF9_MAIZE); contains Interpro domain(s) IPR000672 Tetrahydrofolate dehydrogenase/cyclohydrolase	FOLD4	At4g00620	XP_004229918.1	MASSPITMMKMKLNNCSPPSTAAAAARFLPLLGPHQIRFRSSVAPLYNPSFPRTIITRPTFSSSSIITAAMANEALVKVIDGKKVAKDVRDEINAEITRMKDSIGVVPGLAVILVGDRKDSATYVRNKKKACETAGIKSYEVCLPENSTEEEVLKYISDFNDDPMVHGILVQLPLPSHMDEEKILHAVCIEKDVDGFHPLNIGQLAMRGREPLFIPCTPKGCIELLHRYNVEIKGKKAVVIGRSNIVGMPAALLLQREDATVSIVHSRTTNPEEITREADIIIAAVGKPNMVRGSWIKPGAVIIDVGINPVEDATNPRGYRLVGDVCYEEAIKVASAITPVPGGVGPMTIAMLLSNTLLSAKRINNFK	4	14	4	0.995	0.00641628	809	5	3	8	'7.5.7.2'	'Coenzyme metabolism.tetrahydrofolate metabolism.tetrahydrofolate (THF) interconversions.bifunctional 5,10-methylene-THF dehydrogenase and 5,10-methenyl-THF cyclohydrolase'	'mercator4v5.0: bifunctional 5,10-methylene-THF dehydrogenase and 5,10-methenyl-THF cyclohydrolase & swissprot: Bifunctional protein FolD 4, chloroplastic & original description: FolD bifunctional protein (AHRD V1 ***- B6TJF9_MAIZE); contains Interpro domain(s) IPR000672 Tetrahydrofolate dehydrogenase/cyclohydrolase'	Cp	1	Cp	Cp	Cp	M	98.6	plastid stroma	plastid	-	Cp	0.95	0.03	No	Detected by both ITAG and Atlas
Solyc01g094290	K(+) efflux antiporter 2, chloroplastic (NCBI) Glutathione-regulated potassium-efflux system protein (AHRD V1 *-*- B3CM92_WOLPP); contains Interpro domain(s) IPR004771 K+/H+ exchanger	KEA2	At1g01790	XP_004229880.1	MGFAYCLWQPNASHCGETLNYSKKSSCDVGLKHKLLGNARVICRNRPGRRLKRIVGCSNSSLAYSRIRLSCALWKSDSSGNLAGVKDSRGVKLLRCQENDSLAFIDGNGRNVESSESAEEGSVSVSANGIAEISSAKELEEDKGEEKEGDNLDELRELLQKALKDLEVAQLNSTMFEEKAQKISEAAIALKDEAANAWDDVNKQLESIEEMVVEEMIAKDAVQKATMALSLAEARLLVALDSIQSAKQGRMSSKTSDESKGEESTSLMEEETALSAAQEDMEECRDRLENCEAILRRLQNKKEELQKEADRLNDLAEEAQINALKAEEDVSNIMLLAEQAVAYELEATQRVNDAEIALQKAEKNLAVSPLDTAETSVVQNGSSALGQVSVDGTLCEDEV…	9	18	9	0.708	0.00456555	902	5	2	7	'24.2.8.2.2'	'Solute transport.carrier-mediated transport.CPA superfamily.CPA-2 family.proton:potassium cation antiporter *(KEA)'	'mercator4v5.0: proton:potassium cation antiporter *(KEA) & swissprot: K(+) efflux antiporter 2, chloroplastic & original description: Glutathione-regulated potassium-efflux system protein (AHRD V1 *-*- B3CM92_WOLPP); contains Interpro domain(s) IPR004771 K+/H+ exchanger'	-	5	-	possibly Cp	not Cp	PM	89	envelope-inner-integral	plastid	plp_at_00002; plp_at_01013; plp_at_01274	-	0.17	0.03	No	Detected by both ITAG and Atlas
Solyc01g094340	Acetyl-coenzyme A carboxylase carboxyl transferase subunit alpha (AHRD V1 *-*- A0YRC5_LYNSP); contains Interpro domain(s) IPR001095 Acetyl-CoA carboxylase, alpha subunit	CAC3	At2g38040	XP_004229885.1	MSSLSLAVGNCGKGRNAENLSSEFVPHSSLGSEFLTKRLYGLNLKDLGSPKVRTRKKFRIAAEIKKWKKQDYPWHGDIDPDTKTPLKYLSYFKPLDEKLKPVTLAFEKPLVNLEKQLIEVRRMAEDTGLDFTDQIYALEAKYQQALRDLYTHLTPIQRLQIARHPNRPTVLDHILNMTEKWVELHGDRAGYDDPAMVTGIGSIEGRSYLFIGHQKGRNTKENIMRNFAMPTPHGYRKALRMMKYADHHGFPIVTFVDTPGAFADLRSEELGQGEAIAYNLRAMFGLKVPIITVVTGEGGSGGALAIGCANKLLMLENSAFYVASPEACAAILWKSSQAAPKAAEKLRITAQEHYRLRIADGIIPEPLGGAHADPFWASQQIKHAILDAMAELGRMNSEQ…	10	19	9	0.753	0.00485573	894	5	0	5	'5.1.3.2.1'	'Lipid metabolism.fatty acid metabolism.acetyl-CoA carboxylation.polymeric acetyl-CoA carboxylase complex.carboxyltransferase subunit alpha'	'mercator4v5.0: carboxyltransferase subunit alpha of polymeric acetyl-CoA carboxylase complex & swissprot: Acetyl-coenzyme A carboxylase carboxyl transferase subunit alpha, chloroplastic & original description: Acetyl-coenzyme A carboxylase carboxyl transferase subunit alpha (AHRD V1 *-*- A0YRC5_LYNSP); contains Interpro domain(s) IPR001095 Acetyl-CoA carboxylase, alpha subunit'	Cp	4	-	none	not Cp	C	72	envelope-inner-peripheral-stromal-side	plastid	plp_at_00218; plp_at_01050; plp_at_01388; plp_at_02519	Cp	0.6	0	No	ITAG only
Solyc01g094500	Riboflavin biosynthesis protein ribD (AHRD V1 ***- B6TRH4_MAIZE); contains Interpro domain(s) IPR004794 Riboflavin biosynthesis protein RibD	PYRD	At4g20960	XP_004229938.1	MYCCPLSPSKQRPYSTAHFLSPSATYFGICNASKRLSISLINLGNESEQSVTTSRLNYGFRLATKRVSISLTSSGNGDRLVNVRCGELAVEHDDGFYIRRCVEIARKAVGHTSPNPMVGCVIVKDGKIVGEGFHPKAGQPHAEVYALRDAGDLAEKATAFVSLEPCNHYGRTPPCTEALIKAKVKKVVVGMVDPNPIVASTGVSRLRDAGIEVITGVEEELCRKLNEAYIHQMLTGKPFVTLRYSLSVDGGLSDQLGAEVTESGGYYSKLLQEYDAVVVSSFLLSTKHSVLSSKEPGAKQPLQIVLAKSSGSLQLPAVTAISSKTIIFSDEDIVMELEASQRGIETVVFDRMNLTAILEHCKRQGLCNVMLDLRGNSAEFEEILQEGFEQNLFQKVIVE…	3	9	3	0.52	0.00335323	976	4	3	7	'7.10.4'	'Coenzyme metabolism.FMN/FAD biosynthesis.pyrimidine deaminase *(PyrD)'	'mercator4v5.0: pyrimidine deaminase *(PyrD) & swissprot: Riboflavin biosynthesis protein PYRD, chloroplastic & original description: Riboflavin biosynthesis protein ribD (AHRD V1 ***- B6TRH4_MAIZE); contains Interpro domain(s) IPR004794 Riboflavin biosynthesis protein RibD'	Cp	4	Cp	none	Cp	Cp	100	plastid	plastid	-	Cp	0.51	0.01	No	Detected by both ITAG and Atlas
Solyc01g094790	Cysteine synthase; Bifunctional L-3-cyanoalanine synthase	CYSC1	At3g61440	XP_004229909.1	MASLSRFLKKRSLDYNNVDLMRAASNRLFSTQLPHTNIKSEVSQLIGKTPMVYLKKVTEGCGAYIAVKQEMFQPTSSIKDRPALAMINDAEKKGLISPEKTTLIEPTSGNMGISMAFMAAMKGYKMVLTMPSYTSMERRVTMRAFGADLILTDPTKGMGGTVKKAYDLLESTPNAFMLQQFSNPANTQVHFDTTGPEIWEESLGNVDIFVMGIGSGGTVTGVGQYLKSKNPNVKIYGLEPTESNILNGGKPGPHHITGNGVGFKPDILDMDLMEEVLMVSSEDAVNMARELAVKEGLMVGISSGANTVAALRLAQKPENKGKLIVTVHASFGERYLSSVLYQDLRKEAENMQPISVD	6	14	5	1.955	0.0126069	612	3	1	4	'50.2.5'	'Enzyme classification.EC_2 transferases.EC_2.5 transferase transferring alkyl or aryl group, other than methyl group'	'mercator4v5.0: EC_2.5 transferase transferring alkyl or aryl group, other than methyl group & swissprot: Bifunctional L-3-cyanoalanine synthase/cysteine synthase 2, mitochondrial & original description: Cysteine synthase (AHRD V1 ***- Q9FS29_SOLTU); contains Interpro domain(s) IPR005859 Cysteine synthase A'	M	2	-	none	Cp	M	88.44	-	mitochondrion	plp_at_00365	M	0	0	No	Detected by both ITAG and Atlas
Solyc01g095000	Homology to unknown gene (AHRD V1 *-*- Q019E6_OSTTA); Nuclear transport factor 2 (NTF2) family protein	-	At2g46100	XP_004229946.1	MATFTSFASIKIPYLQSGDRRSIFRPNSSKKILKLPRCNVENSTSNSSNNTSTSSQDSESENLLLKMAWYGSEFLGIAASIFRSPAGTEAPSEGNLELATDGSGLVDRALVVDNIKDDFQRSYFVTGNLTLNAYEDKCEFADPAGSFKGLSRFKRNCTNFGYLVETSNMKLMKWEDFEDKAIGHWRFSCILSFPWKPILSATGYTEYYFNEKSGKVCRHIEHWNVPKMALLKQIIRPSRGEKASG	1	2	1	0.212	0.00136709	1110	2	0	2	'35.2'	'not assigned.not annotated'	'mercator4v5.0: not classified & original description: Homology to unknown gene (AHRD V1 *-*- Q019E6_OSTTA)'	Cp	1	Cp	possibly Cp	Cp	C	52.6	-	plastid	-	Cp	0.63	0.26	No	Detected by both ITAG and Atlas
Solyc01g095430	Curvature thylakoid 1A	CURT1A	At4g01150	XP_004229969.1	MAAAAAASTSMAATAVFASPFPLSSTTKAAPARCSALPYLPSRLSAIAFPSSLKIAEPKRSSLLQVKASSSEESGAVDTSELLTDLKEKWDALDNKSTVIVYGGGAIVAVWLSSIVVSAINSVPLLPKIMELVGLGYSGWFVYRYLLFKSSRKELAEDIEQLKKKIAGTE	2	5	2	2.162	0.0139417	561	4	3	7	'1.1.1.5.4.2'	'Photosynthesis.photophosphorylation.photosystem II.photosynthetic acclimation.thylakoid grana stacking.regulatory factor *(CURT)'	'mercator4v5.0: regulatory factor *(CURT) of thylakoid grana stacking & swissprot: Protein CURVATURE THYLAKOID 1A, chloroplastic & original description: Threonine endopeptidase (AHRD V1 **-- B6TCN7_MAIZE)'	Cp	1	Cp	Cp	Cp	Cp	99.8	thylakoid-integral	plastid	plp_at_00378; plp_at_01227; plp_at_01483; plp_at_01838	Cp	1	0	No	Detected by both ITAG and Atlas
Solyc01g095670	Rhodanese-like domain-containing protein 4 (NCBI)	-	At3g25480	XP_010326928.1	MEAINAVRLTPLSVRSDRKNEAKKIPSHPISFPFKNLCSVENLSRNVQGGLVLVSSVLNTGLAKALTYEETIEQSETIPGAEFDATAVVETVTTFASENPIIIAGGFAALALPIVLFQVLGKPPKSWGVESAKTAYAKLADDAGAQLLDIRATAELREVGTPDIRGLKKKPVTVVYKAEDKTGFLKKLSLKFKEPENTTLFILDKFDGNSELVAELVTENGFKAAYAIKDGAEGPRGWLNSSLPWILPKKTLGLDLSNLSDALDGVLGEGSDAVTVGLGVAAATGLGILAFSEVETILQLLGSAALVQLVSKKLLFAEDRKKTLQQVDEFLTTKVAPKELVDEIKQIGKALLPDSVSSNALPAPVEASPAAATSTVEETESVPKEDIAPPKVEAISPPT…	4	11	4	0.624	0.00402388	938	5	3	8	'1.1.5.2.2.1'	'Photosynthesis.photophosphorylation.linear electron flow.ferredoxin-NADP reductase (FNR) activity.FNR membrane-tethering.FNR-recruitment protein *(TROL)'	'mercator4v5.0: protein involved in ferredoxin-NADP oxidoreductase membrane-tethering *(TROL) & swissprot: Rhodanese-like domain-containing protein 4, chloroplastic & original description: Rhodanese-related sulfurtransferase (AHRD V1 *--- A0NUG1_9RHOB); contains Interpro domain(s) IPR001763 Rhodanese-like'	Cp	4	-	none	Cp	C	61.5	thylakoid	plastid	plp_at_01806	-	0.11	0.41	No	Detected by both ITAG and Atlas
Solyc01g095690	Pentatricopeptide repeat-containing protein (AHRD V1 ***- D7KIA6_ARALY); contains Interpro domain(s) IPR002885 Pentatricopeptide repeat	-	At4g01030	XP_004231209.1	MEAVATPLYHFISPLNQKQPRCYSTNFGLVNVAETLPESSLSTSLESLSSLQFDYENKFNSLNSVRAMHAKMIKLSNEWDTKKNMQYFISGYLEFGDFQSAAVLFFVGFAENYLYWNSFLEEYTYFGGTPCEILEVFSELHSKGVNFNTEILAFVLKICSKLRDMWLGLEVHACLIKKGFDLDVYTKCALMNFYGRCCGTESANKVFKETSMHDSLLWNEAILVNLRNEKWTEGLQMFRDMQDLFVKANSLTISKVLQACGKLGALDEGKQIHGYVIRYALESNILIRTALINMYVKNDNIKLARVVFASTDNRNLPCWNSIISGYTALGYLDDAWELFHEMKTCNIKPDIITWNSLLSGHFLHGSYREVLAIVTRMQSAGYQPNRNSITSALQAVSEL…	2	2	2	0.11	0.000709337	1196	2	0	2	'35.1'	'not assigned.annotated'	'mercator4v5.0: not classified & swissprot: Pentatricopeptide repeat-containing protein At4g01030, mitochondrial & original description: Pentatricopeptide repeat-containing protein (AHRD V1 ***- D7KIA6_ARALY); contains Interpro domain(s) IPR002885 Pentatricopeptide repeat'	Cp	3	Cp	possibly Cp	Cp	C	99.3	plastid	-	-	-	0.06	0.01	No	Detected by both ITAG and Atlas
Solyc01g096400	Unknown Protein (AHRD V1)	-	-	XP_004230025.1	MSSLSCQWLSGPYAYPSGRFCNLSSSNTSLAGFTIYCSNSQFTPRAPGPESSKNDLKFVLHDALDASGVNTTHARIAREGFCSQIQKLSNIERETSICINRGVDLGKAALHIAAEDDSLVSHSSVPLPVDDFLERLDHLSMGYCSRYSSSFTSSPEHFIHCLEKYLYVNKGFRRTGATNQSEPRALYLHSVLTHRSGSASLLSLLYSEILKMLRLWGFLSFDIEVFFPHDSSSTPRGYCKQKTKESDQSHVMTTQSLLQEMLKDLKDAFWPFQLDHTKSPFLRAARAANCSESTNDSDESAFELASVKAALHRLERGVWTSVRFGDMRRALSACERLILLQTEPKELRDYGALLYHCGFYKESLHYLTVYQDGQKESLDLIDNVEEEEALEKLMIRLNL…	2	6	2	0.259	0.00167017	1080	5	1	6	'35.2'	'not assigned.not annotated'	'mercator4v5.0: not classified & original description: Unknown Protein (AHRD V1)'	Cp	5	Cp	Cp	Cp	Cp	40.4	-	-	-	Cp	0.6	0.03	No	Detected by both ITAG and Atlas
Solyc01g096480	Thioredoxin protein (AHRD V1 ***- Q6JE37_NICBE); contains Interpro domain(s) IPR013766 Thioredoxin domain	Trx-z PAP10	At3g06730	NP_001234469.1	MQAASLAFHPPALRTSPSYLSSKLPHHLNYSLFKHAPSTSTLSLTQVLSRNTICKPPAVGKYVREDYLVKKLSAKEIQELIKGERNVPLIIDFYATWCGPCILMAQELEMLAVEYENNALIVKVDTDDEYEFARDMQVRGLPTLYFISPDSSKDAIRTEGLIPIQMMRDIIDNDL	4	12	4	1.31	0.00844756	734	5	1	6	'10.3.3.6'	'Redox homeostasis.thiol-based redox regulation.thioredoxin activities.Z-type thioredoxin *(Trx-Z)'	'mercator4v5.0: Z-type thioredoxin *(Trx-Z) & swissprot: Thioredoxin-like protein CITRX, chloroplastic & original description: Thioredoxin protein (AHRD V1 ***- Q6JE37_NICBE); contains Interpro domain(s) IPR013766 Thioredoxin domain'	Cp	2	Cp	none	Cp	Cp	100	plastid	plastid	plp_at_00253	Cp	0.99	0.01	No	Detected by both ITAG and Atlas
Solyc01g096660	PSII-associated proline-rich protein (NCBI); MAINTENANCE OF PSII UNDER HIGH LIGHT 1, MPH1 (At5g07020)	MPH1	At5g07020	NP_001234524.1	MACAALSANSCTIASSSTGRLSFSTYQKDSKLRQRHSLVRFRVRASTDDSDCNAEECAPDKEVGKVSMEWVAMDNTKVVGTFPPRKPRGWTGYVEKDTAGQTNIYSVEPAVYVAESAISSGTAGTSSDGAENTKAISAGIALISVAAASSILLQVGKNSPPPIQTVEYRGPSLSYYINKLKPAEIVQASITEAPTAPETEEVAITPEVESSAPEAPAPQVEVQSEAPQDTSSSSSNIS	4	51	4	4.623	0.0298115	338	5	3	8	'1.1.1.4.5'	'Photosynthesis.photophosphorylation.photosystem II.repair and reassembly cycle.photoprotective factor *(MPH1)'	'mercator4v5.0: protein involved in photoprotection *(MPH1) & swissprot: Protein MAINTENANCE OF PSII UNDER HIGH LIGHT 1 & original description: Genomic DNA chromosome 5 P1 clone MOJ9 (AHRD V1 ***- Q9FL44_ARATH)'	Cp	2	Cp	Cp	Cp	Cp	97.5	thylakoid	plastid	plp_at_00494; plp_at_01878	Cp	0.99	0	No	Detected by both ITAG and Atlas
Solyc01g096870	Prolyl-tRNA synthetase (AHRD V1 **** Q7XZD2_RAPSA); contains Interpro domain(s) IPR004499 Prolyl-tRNA synthetase, class IIa, prokaryotic-type	ProRS	At5g52520	XP_004230061.1	MGALRLPALTSIFTSSSSVRSSPAILPLKHRLRLPLRRPFSAQSTTEKVVAPELGDGKGKVVDKEKDRVITPRSQDFNAWYLDVIANAELADYGPVRGTMVIRPYGYAIWEAIQEYMNVKFKETGHSNMYFPQFIPYSFIEKEASHVEGFSPELALVTVGGGKELEEKLVVRPTSETIVNHMFTQWIHSYRDLPLMINQWANVTRWEMRTKPFIRTLEFLWQEGHTAHATAEEAEEEAMQMIDVYTKFAYEQAAIPVIAGRKSRVETFAGASTTYTIEAMMGDRKALQAGTSHNLGQNFSRAFGTQFTDENGQRQHVWQTSWAISTRFVGGIIMTHGDDAGLLLPPRLAPVQVIIVPIWKKDNEKAGVLTASSSVKESLQAAGIKVKIDDSDQRTPGWK…	17	120	17	9	0.0580367	163	5	3	8	'17.2.17'	'Protein biosynthesis.aminoacyl-tRNA synthetase activities.proline-tRNA ligase'	'mercator4v5.0: proline-tRNA ligase & swissprot: Proline--tRNA ligase, chloroplastic/mitochondrial & original description: Prolyl-tRNA synthetase (AHRD V1 **** Q7XZD2_RAPSA); contains Interpro domain(s) IPR004499 Prolyl-tRNA synthetase, class IIa, prokaryotic-type'	Cp	4	Cp	Cp	Cp	C	44.2	plastid stroma; mitochondria	plastid	plp_at_02570	M	0.4	0	No	Detected by both ITAG and Atlas
Solyc01g096900	DNA gyrase subunit A family protein (AHRD V1 ***- D7L923_ARALY); contains Interpro domain(s) IPR005743 DNA gyrase, subunit A	GYRA	At3g10690	XP_004230064.1	MKLHTLNPQTSFVQSNSMAFSTGIRLLRCYHHQFTFTAIPSRFSGLRKASSELRFLSSVTPSRKHVRPVSARRKVTEEEVGEEGNGSVVLRDRDGNEGGGGERIVHTELHKEATEAYMSYAMSVLLGRALPDVRDGLKPVHRRILYAMHELGLSSKKPYKKSARVVGEVLGKFHPHGDNAVYDSLVRMAQDFSLRSPLIRGHGNFGSIDADPPAAMRYTECRLEALTEAMLLADLEQNTVDFVPNFDNSQKEPSLLPARIPNLLLNGASGIAVGMATNIPPHNLGELVDALSALIHNPEATLQELLEYMPGPDFPTGGIIMGNIGILEAYRTGRGRVVIRGKTDIELLDAKTKRAAIIIQEIPYQTNKASLVEKIADLVENKTLEGVSDIRDESDRSGM…	10	27	10	0.882	0.00568759	843	5	3	8	'13.1.6.3.1'	'Cell division.DNA replication.organelle machinery.DNA gyrase complex.subunit A'	'mercator4v5.0: subunit A of DNA gyrase complex & swissprot: DNA gyrase subunit A, chloroplastic/mitochondrial & original description: DNA gyrase subunit A family protein (AHRD V1 ***- D7L923_ARALY); contains Interpro domain(s) IPR005743 DNA gyrase, subunit A'	Cp	4	Cp	possibly Cp	Cp	N	29.4	plastid; mitochondria	plastid	plp_at_00264	Cp	0.72	0	No	Detected by both ITAG and Atlas
Solyc01g097160	FAD dependent oxidoreductase (AHRD V1 ***- B7G7N7_PHATR); contains Interpro domain(s) IPR006076 FAD dependent oxidoreductase	-	At3g04650	XP_025888114.1	MNSACNNPLLSSSFLHQPLKSSRFPNVSIFFPIISNPITPNRCIPIKTTIKGSMESRNPTKGRSTSPRKFKPRYGTSRRSTIKKSLSQEQVNFTKPIPDDPVVGIIGGGMSGLTCALYLEKRGIRSTVFDTGIHGLGGRMGTRMIDHQPLIFDHAAQFFTVTNPKFAELVDDWLKRGLVREWKGTIGELEVGGNFVPFPSSPPKYIGVNGMRPLADSLLSQTSLVNVVRPCWVSALEPFNGTWHLSEKGKPCGQFDAIVIAHNGKCANRLLAASGLPLIAKQMKRLELSSIWALLAAFEDPLPTALNAASLPFEGAFVKGVESVSWMANNTKKLLASDSGPQCWTFFSTATFGKQNKVPQESIPNATGEKVKEAMLEGVEKALGLSKSSLQKPFYTKLQ…	7	15	7	4.012	0.0258715	371	5	3	8	'35.2'	'not assigned.not annotated'	'mercator4v5.0: not classified & original description: FAD dependent oxidoreductase (AHRD V1 ***- B7G7N7_PHATR); contains Interpro domain(s) IPR006076 FAD dependent oxidoreductase'	Cp	1	Cp	none	Cp	Cp	97.5	plastid	-	-	Cp	0.97	0	No	Detected by both ITAG and Atlas
Solyc01g097310	Sec-independent protein translocase protein tatA/E homolog (AHRD V1 *-*- D7DW94_NOSA0); contains Interpro domain(s) IPR006312 Twin-arginine translocation protein TatA/E	TATA	At5g28750	XP_004230095.1	MAAIISSGAAVTTTLSLSFTPKPISSSSSSSAPKIQTLCSSSSLFFNSNSQLFLGPPTTTRKVRSNSKRGLSCYCLFGLGVPELAVIAGVAALVFGPKQLPEVGRNIGKTVKSFQQAAKEFESELKKEPDASAQPPVEKAIEVSHEEKQDTKVPSTKESS	4	15	4	9	0.0580367	164	5	0	5	'23.1.6.1'	'Protein translocation.chloroplast.thylakoid membrane Tat translocation system.dual-targeted component *(TatA)'	'mercator4v5.0: dual-targeted component *(TatA) of plastidial/mitochondrial Tat protein translocase system & swissprot: Sec-independent protein translocase protein TATA, chloroplastic & original description: Sec-independent protein translocase protein tatA/E homolog (AHRD V1 *-*- D7DW94_NOSA0); contains Interpro domain(s) IPR006312 Twin-arginine translocation protein TatA/E'	Cp	1	Cp	Cp	Cp	Cp	90.4	thylakoid-integral	plastid	-	Cp	0.85	0.15	No	Detected by both ITAG and Atlas
Solyc01g097460	Ribose-5-phosphate isomerase (AHRD V1 ***- A8IRQ1_CHLRE); contains Interpro domain(s) IPR004788 Ribose 5-phosphate isomerase	RPI3	At3g04790	XP_004230104.1	MASLSLISPHSPSSSSSSTLRHSSIIGTRLPSIFLRNPTIRIRSTTPSIKAFSAPVPSPLTQDELKKLAADKAVEYVKSGMVLGLGTGSTAAFVVAKLGELLSSGQLTNIVGVPTSKRTEEQALSLNIPLSTLDDHPHIDLAIDGADEVDPNLDLVKGRGGALLREKMVEAASDKFVVVVDDSKLVSGLGGSGLAMPVEVVQFCWKYNLVRLQELFKEEGVDAKLRLDGNGKPYVTDNSNYIVDLYFKTPIRDSAAAGKEIASFEGVVEHGLFLDMTTAVIIAGKEGVSVKSK	11	246	11	33.551	0.216354	53	5	3	8	'1.2.9'	'Photosynthesis.calvin cycle.ribose 5-phosphate isomerase'	'mercator4v5.0: ribose 5-phosphate isomerase & swissprot: Probable ribose-5-phosphate isomerase 3, chloroplastic & original description: Ribose-5-phosphate isomerase (AHRD V1 ***- A8IRQ1_CHLRE); contains Interpro domain(s) IPR004788 Ribose 5-phosphate isomerase'	Cp	3	Cp	Cp	Cp	Cp	93.4	thylakoid-peripheral-stromal-side; plastid stroma	plastid	plp_at_00251; plp_at_01416; plp_at_01793; plp_at_02369	Cp	0.98	0.02	No	ITAG only
Solyc01g097810	Zeta-carotene desaturase	ZDS	At3g04870	NP_001234383.2 D'Andrea et al (2018)	MATSSAYLSCPATSATGKKHVFPNGSPGFLVFGGTRLSNRLVTRKSVIRADLDSMVSDMSTNAPKGLFPPEPEHYRGPKLKVAIIGAGLAGMSTAVELLDQGHEVDIYESRTFIGGKVGSFVDRRGNHIEMGLHVFFGCYNNLFRLLKKVGAEKNLLVKEHTHTFVNKGGEIGELDFRFPVGAPLHGINAFLSTNQLKIYDKARNAVALALSPVVRALVDPDGALQQIRDLDNVSFSEWFLSKGGTRASIQRMWDPVAYALGFIDCDNMSARCMLTIFALFATKTEASLLRMLKGSPDVYLSGPIKKYIMDKGGRFHLRWGCREVLYETSSDGSMYVSGLAMSKATQKKIVKADAYVAACDVPGIKRLVPQKWRELEFFDNIYKLVGVPVVTVQLRYNG…	18	70	18	5.918	0.0381623	276	5	3	8	'9.1.6.1.4'	'Secondary metabolism.terpenoids.carotenoid biosynthesis.carotenes.zeta-carotene desaturase *(ZDS)'	'mercator4v5.0: zeta-carotene desaturase *(ZDS) & swissprot: Zeta-carotene desaturase, chloroplastic/chromoplastic & original description: Zeta-carotene desaturase'	Cp	2	Cp	Cp	Cp	Cp	100	plastid	plastid	plp_at_01417	Cp	0.97	0.02	No	Detected by both ITAG and Atlas
Solyc01g097820	Protein of unknown function DUF2358 - NTF2-like superfamily- possible adenine phosphoribosyltransferase-like protein	-	At3g04890	XP_004230122.1	MKKMLSYIIPKTMGYMKPEIRQRKMAGMCCYSSLSQTLIKKKLQGGFYCCSPAPNNQKVKTQTPKLLKIAVSGVTELLRLLSSSSTNRLGISDDEGGGEPLVYNVEDVLKIIKLDYEKAYFVTGLFTSGIYAEDCVFEDPTIKFRGRDLYSRNLQLLVPFFDSPSIKLEKIEKGNDSNAGVIVAYWKLRTSLKLPWQPLISVDGKTVYDLDEQLKIVKHVESWNISALEAVGQIFTPGLRSSGSYSLRTA	2	3	2	0.52	0.00335323	977	3	0	3	'35.2'	'not assigned.not annotated'	'mercator4v5.0: not classified & original description: SOUL heme-binding protein (AHRD V1 *--- A8JFN5_CHLRE); contains Interpro domain(s) IPR018790 Protein of unknown function DUF2358'	-	3	-	possibly M	Cp	Cp	88.92	plastid	plastid	-	-	0.04	0.02	No	Detected by both ITAG and Atlas
Solyc01g097860	Fluctuating light acclimation protein 1	FLAP1	At1g54520	XP_004230121.1	MAAAPFLLESNLKWNPLFYTPNPIQCTRLIHYQKLTPSKFSKTSKLTVKCFSKNHKNVCFNDGNGLEVKNKENPFEIVVKSVMKALKALQKPAVAAVLVGLLLMAVCLLLLEKLVCSSYRSLQKDLNRIAEVADTSTPEGLSFVLTETTLALLRHPGYCISAYSSVDVKRSMEEGENRFNQLSIEERGKFDEETLVNVNNIRRKSSTSQRATGFSNEYIVVTILVAAEGAYKLPTINGSGDLKEALQKIASIPSSRTLAVEILWTPQNENDTLSERQLLEDYPLLRPL	1	1	1	0.179	0.00115428	1132	1	1	2	'1.1.1.5.3.1.4'	'Photosynthesis.photophosphorylation.photosystem II.photosynthetic acclimation.non-photochemical quenching (NPQ).qE/qZ-type quenching.regulatory protein *(FLAP1)'	'mercator4v5.0: regulatory protein *(FLAP1) of non-photochemical quenching & original description: Membrane protein (AHRD V1 *-*- A8JG04_CHLRE); contains Interpro domain(s) IPR010903 Protein of unknown function DUF1517'	-	5	-	Cp	Cp	PM	94.3	plastid	plastid	plp_at_00105	Cp	0.45	0.38	No	Detected by both ITAG and Atlas
Solyc01g098380	Dihydrodipicolite reductase family protein (AHRD V1 **** D7LKV2_ARALY); contains Interpro domain(s) IPR011859 Dihydrodipicolite reductase, plant	DAPB1	At2g44040	XP_004230153.1	MWAIIKVPLYINGGGMRYSSSSKNGCNSFVRGRKYSVKMCSAPAQNVEVLVKSKIEPLPIMVNGCTGKMGRAVLEASIAAGLQPVPICFGGPQDEGKTVEAGGKEIIVHGPSDRENLLSSVFEEHPNLIVVDYTLPAAVNDNAELYCKVGVPFVMGTTGGDREKLYKTVVDSKVYAVISPQMGKQVVAFLAAMEIMAEQFPGAFSGYSLQVMESHQASKLDTSGTAKAVISCFENLGVSFDLDKVQLIRDPVQQVEMVGVPEEYLLGHAFHMYHLTSPDGTVSFEFQHNVCGRSIYAEGTVDAILFLAKKVKLKEEKRIYDMIDVLREGNMR	5	19	5	1.512	0.00975016	687	5	3	8	'4.2.2.3.2'	'Amino acid metabolism.aspartate group amino acid biosynthesis.aspartate-derived amino acids.lysine.hydroxy-tetrahydrodihydrodipicolinate reductase'	'mercator4v5.0: hydroxy-tetrahydrodihydrodipicolinate reductase & swissprot: 4-hydroxy-tetrahydrodipicolinate reductase 1, chloroplastic & original description: Dihydrodipicolinate reductase family protein (AHRD V1 **** D7LKV2_ARALY); contains Interpro domain(s) IPR011859 Dihydrodipicolinate reductase, plant'	Cp	5	Cp	possibly M	Cp	V	32.2	plastid stroma	plastid	-	Cp	0.75	0.01	No	Detected by both ITAG and Atlas
Solyc01g098550	Tryptophan synthase alpha chain (AHRD V1 ***- Q8LA83_ARATH); contains Interpro domain(s) IPR002028 Tryptophan synthase, alpha chain	TSA	At3g54640	XP_004230160.1	MSFHSYTTVRPYLTPSPSASPLFLHFQVERRFGDGMASFLKATHFIHSSNNHQNHPFSQSYTQTIKISTSRKPLMAALSATATVGLSETFTRLKEQGKVALIPYITAGDPDLATTAEALKVLDRCGSDIIELGVPYSDPLADGPVIQAAASRSLTKGTNFAKVISMLEDVVPQLSCPIALFTYYNPILKRGTEKFMATVRDTGVHGLVVPDVPLEETEMLRKEAARHNIELVLLTTPTTPKIRMKAITEASEGFVYLVSAVGVTGARASVSSKVQSLLLDIKEATSKPVAVGFGISKPEHVKQVAEWGADGVIVGSAMVRILGEAKSPEEGLKELEVFTTSLKSALS	4	19	4	2.162	0.0139417	562	5	3	8	'4.5.3.5.1'	'Amino acid metabolism.shikimate group amino acid biosynthesis.tryptophan.tryptophan synthase heterodimer.subunit alpha'	'mercator4v5.0: subunit alpha of tryptophan synthase complex & swissprot: Tryptophan synthase alpha chain & original description: Tryptophan synthase alpha chain (AHRD V1 ***- Q8LA83_ARATH); contains Interpro domain(s) IPR002028 Tryptophan synthase, alpha chain'	M	4	Cp	Cp	Cp	Cp	100	plastid stroma	plastid	plp_at_02538	Cp	0.64	0.17	No	Detected by both ITAG and Atlas
Solyc01g098610	Glutathione synthetase (AHRD V1 **** Q6F4I7_ZINEL); contains Interpro domain(s) IPR005615 Glutathione synthase, eukaryotic	GSH2	At5g27380	NP_001234014.2	MGSGCSSPSISLTTIATSHFQSQESLSNSLNFYSPTRFLEPHLLKSSKIFIPKSPLKCAKVPEMQTQLEDSAKPIVDPHDIDSKLVQKLANDALVWCSLRGLLVGDRNSERSGTIPGVDMVHAPVALIPMSFPESHWKQACEVAPIFNELVDRVSQDGEFLQQSLSRTRKADPFTSRLLEIHSKMLEINKLEEIRLGLHRSDYMLDEQTKLLLQIELNTISSSFPGLSCLVSELHRSLLQQYREDIASDPNRIPANNAVNQFAEALAKAWNEYGDPRAVIIFVVQAEERNMYDQHWLSASLRERHQVTTIRKTLAEIDALGELQQDGTLVVDGQAVAVIYFRAGYAPSDYHSESEWKARLLMEQSRAVKCPSISYHLAGSKKIQQELAKPNVLERFLEN…	9	29	9	1.683	0.0108529	654	5	0	5	'10.2.1.2'	'Redox homeostasis.glutathione-based redox regulation.glutathione biosynthesis.glutathione synthetase *(GS)'	'mercator4v5.0: glutathione synthetase *(GS) & swissprot: Glutathione synthetase, chloroplastic & original description: Glutathione synthetase (AHRD V1 **** Q6F4I7_ZINEL); contains Interpro domain(s) IPR005615 Glutathione synthase, eukaryotic'	Cp	2	Cp	possibly Cp	Cp	Cp	100	cytosol; plastid stroma	plastid,cytosol	-	Cp	0.53	0.01	No	Detected by both ITAG and Atlas
Solyc01g098640	Thylakoid lumen 18.3	TLP18.3	At1g54780	XP_004230168.1	METILSPPFSPLFNPKTSLSKPFLSLPHLPRSTKSICCSLRKQYSQTEKQSFSVPKSWVSHVQQGLAAIAISLALNFCPVVSSDSALASEFDVLNEGPPKDSYVVDDAGVLSRVTKSDLKALLSDVEKRKGFHINFITVRKLTSKADAFEYADQVLEKWYPSVEQGNDKGIVVLVTSQKEGAITGGPDFVKAVGDTVLDATVSENLPVLATEEKYNEAVFSTARRLVAAIDGLPDPGGPQLKDNKRESNFKSREETDEKRGQFTLVVGGLLVIAFVVPMAQYYAYVSKK	10	34	10	5.31	0.0342416	304	5	3	8	'1.1.1.3.11'	'Photosynthesis.photophosphorylation.photosystem II.assembly.assembly factor *(Psb32)'	'mercator4v5.0: protein involved in PS-II assembly *(Psb32) & swissprot: UPF0603 protein At1g54780, chloroplastic & original description: UPF0603 protein At1g54780, chloroplastic (AHRD V1 **-- U603_ARATH); contains Interpro domain(s) IPR007621 Protein of unknown function DUF477'	Cp	1	Cp	Cp	Cp	Cp	99.7	thylakoid-peripheral-lumenal-side	plastid	plp_at_00106; plp_at_01165; plp_at_01630; plp_at_01733; plp_at_01920	Thylakoid	0.09	0.91	Yes	Detected by both ITAG and Atlas
Solyc01g098990	uncharacterized protein LOC101264675 with DUF1955 domain	-	At5g27560	XP_004230190.1	MASALYSSLSWCCTPIPKPSFKTPFSSSIYPLNTRGFSGISLHKSVPSSRTHAKFDKFQGQENLEPDPQLQTVEEEDQEEDDSRVELLIPQLQFLDDEGAQAELWELSRTFLETLIEETGCERVKAIFPDAGAAALLKYRWKDATFEFASLGDRKPVSKEDEIVVMVVPDYQMLEYVEKIASDLSDDPPRPLIMWNPRLISEDVGVGINVRRLRRNFLSTFTVAYSMRPLPDGAVFRCYPGLWKVFYDDKDRPNRYLLAKEQISRPTIEDLEIIYGGVDEKEDKGPSLLNQAAGIFSSINRFMKVISR	2	14	2	1.512	0.00975016	688	5	3	8	'35.2'	'not assigned.not annotated'	'mercator4v5.0: not classified & original description: Os06g0146300 protein (Fragment) (AHRD V1 ***- Q0DEL6_ORYSJ); contains Interpro domain(s) IPR018962 Domain of unknown function DUF1995'	Cp	1	Cp	Cp	Cp	Cp	99.9	plastid	plastid	-	Cp	0.91	0.06	No	Detected by both ITAG and Atlas
Solyc01g099110	Xaa-pro aminopeptidase (AHRD V1 **-- A1DF27_NEOFI); contains Interpro domain(s) IPR000994 Peptidase M24, structural domain	APP2	At3g05350	XP_004230202.1 Walling (2006)	MDSSLSVSTTMLTCSSKLHHYPPRSFRFLTFSLPIFRKLGICPKFLSKSPKLTVRSSSSITAKPSWEFQKKDSGKEQDNKLRALREIFTGPGVNVDAYIIPSQDAHQSEFIAECYMRRAYISGFTGSAGTAVVTKDKAALWTDGRYFLQAEKQLNSSWDLMRAGNMGVPTPSQWLNTVLAPGCRIGIDPFLFSSDAAKEFKEDISKGNHELVFLYDFNLVDEIWKESRPNPPKEPIRLHDLKYAGVNVSSKLSCLRSELRNAGASAIVISMLDEIAWLLNLRGNDIRHSPVMYAYLVVEIDGAKLFVDDTKVTPEVMEHLTNAGIELRAYESILSEIESLAAKGANLWLDTSSVNAAIVNAYESACYKYPWDSATKSRKKRNANLNSNGQSGGPCAVYR…	16	57	16	4.736	0.0305402	336	5	3	8	'19.4.5.6.4.1'	'Protein homeostasis.proteolysis.metallopeptidase activities.aminopeptidase activities.M24-class aminopeptidase activities.aminopeptidase *(APP)'	'mercator4v5.0: aminopeptidase *(APP) & swissprot: Aminopeptidase P2 & original description: Xaa-pro aminopeptidase (AHRD V1 **-- A1DF27_NEOFI); contains Interpro domain(s) IPR000994 Peptidase M24, structural domain'	Cp	2	Cp	Cp	Cp	Cp	92	plastid stroma	plastid	plp_at_02525	Cp	0.97	0	No	Detected by both ITAG and Atlas
Solyc01g099690	ATP-dependent Clp protease proteolytic subunit (AHRD V1 ***- B9RFA9_RICCO); contains Interpro domain(s) IPR001907 Peptidase S14, ClpP	CLPR3	At1g09130	XP_004230237.1 D'Andrea et al (2018)	MATCLRLPMASSIPCSSSSSMTLKHRSFNFRCAAYSNSSSNIPMPPFNPKDPFLSKLASVAANNPDALFSRPQNSDMPPFLDIYDSPKLMATPAQVERSVSYNEHRASTPPPDLPSMLLHGRIVYIGMPLVSAVTELVIAELMYLQYMDPKAPIYLYINSTGTTRDDGETVGMEAEGFAIYDSMMQLQNEIHTVAVGAAIGQACLLLAAGTKGKRFMMPHAKAMIQQPRAPSSGLMQASDVYIRAKEVLVNRDNLVKLLAKHTENSEETVSNVMRRPYYMDSIKAREFGVIDKILWRGQEQEQIIASVDAPEVWDNRAGIKVADAF	10	62	10	12.895	0.0831536	124	5	3	8	'19.4.2.9.2'	'Protein homeostasis.proteolysis.serine-type peptidase activities.chloroplast Clp-type protease complex.non-proteolytic core component *(ClpR)'	'mercator4v5.0: non-proteolytic core component *(ClpR) of chloroplast Clp-type protease complex & swissprot: ATP-dependent Clp protease proteolytic subunit-related protein 3, chloroplastic & original description: ATP-dependent Clp protease proteolytic subunit (AHRD V1 ***- B9RFA9_RICCO); contains Interpro domain(s) IPR001907 Peptidase S14, ClpP'	Cp	2	Cp	Cp	Cp	Cp	99.9	plastid stroma	plastid	plp_at_01291; plp_at_02479	M	0.43	0	Yes	Detected by both ITAG and Atlas
Solyc01g100360	Dihydrolipoyl dehydrogenase (AHRD V1 ***- B5LAW5_CAPAN); contains Interpro domain(s) IPR006258 Dihydrolipoamide dehydrogenase	PDH-E3	At4g16155	XP_004230295.1	MQSSISLSLSSPSTICRSDSSAAVSNVNVNLLNPRSLRFCGLRREAFGLNSSLSTHRIQSLSNATRRPCSNRIVASSAGNGAASKGFDYDLVIIGAGVGGHGAALHAVEKGLKTAIIEGDVVGGTCVNRGCVPSKALLAVSGRMRELQNEHHMKSFGLQVAAAGYDRQGVADHANNLASKIRSNLTNSMKSLGVDILTGFGTVLGPQKVKYGDTVITAKDIIIATGSVPLVPKGIEVDGKTVITSDHALKLEFVPQWIAIVGSGYIGLEFSDVYTALGSEVTFVEALDQLMPGFDPEIGKLAQRVLINPRKIDYHTGVFASKITPAKDGKPVTIELIDAKTKELKDTLEVDAALIATGRAPFTQGLGLENINVQTQRGFVPVDSRMRVIDASGELVPHL…	12	31	8	2.03	0.0130905	606	5	1	6	'5.1.2.2.3'	'Lipid metabolism.fatty acid metabolism.acetyl-CoA generation.plastidial pyruvate dehydrogenase complex.E3 dihydrolipoamide dehydrogenase component'	'mercator4v5.0: dihydrolipoamide dehydrogenase component of plastidial pyruvate dehydrogenase complex & swissprot: Dihydrolipoyl dehydrogenase 1, chloroplastic & original description: Dihydrolipoyl dehydrogenase (AHRD V1 ***- B5LAW5_CAPAN); contains Interpro domain(s) IPR006258 Dihydrolipoamide dehydrogenase'	Cp	1	Cp	Cp	Cp	M	96.3	plastid	plastid	plp_at_00416; plp_at_01499	Cp	0.99	0.01	No	Detected by both ITAG and Atlas
Solyc01g100410	Iron-sulfur assembly protein IscA-like 2 (NCBI); Iron-sulfur cluster insertion protein ErpA (AHRD V1 ***- C8Q1G7_9GAMM); contains Interpro domain(s) IPR016092 FeS cluster insertion	ISCA-like	At1g10500	XP_004230302.1	MLSSSSSTSMIRRVVPFFTARIRQNYRLLNSSASALSQPQSQSQSQVEATDSVVMTENCVRRIKELQAGEHKEKMLRLSVEAGGCSGFQYEFSLDDKTNSDDRIFEHDGVKLVVDNVSFDFVKGATVDYVEELIRSAFQVSTNPSAVGGCSCKSSFMVKQ	1	1	1	0.292	0.00188297	1066	1	0	1	'7.12.2.2.1.2'	'Coenzyme metabolism.iron-sulfur cluster assembly machinery.mitochondrial ISC system.transfer phase.IscA1-IscA2 scaffold heterodimer.component *(IscA2)'	'mercator4v5.0: scaffold protein ISCA2 of mitochondrial ISC system transfer phase & swissprot: Iron-sulfur assembly protein IscA-like 2, mitochondrial & original description: Iron-sulfur cluster insertion protein ErpA (AHRD V1 ***- C8Q1G7_9GAMM); contains Interpro domain(s) IPR016092 FeS cluster insertion'	Cp	3	Cp	M	Cp	M	99.1	plastid stroma	plastid	-	M	0.29	0.03	No	Detected by both ITAG and Atlas
Solyc01g100520	Clp protease proteolytic subunit P5	CLPP5	At1g02560	NP_001334032.1 D'Andrea et al (2018)	MAHSCIATTSSLSKYNSAIFPSDYCNISPISLQFKRLSLRKVKAVGKVKSRGNSTVKAVYSGGDWDLAKASRSSGIWSIRDDVQIPSSPYFPTYAAQGQGPPPMVQERFQSVISQLFQYRIIRCGGAVDDDMANVIVAQLLYLDAVDPTKDIVMYVNSPGGSVTAGMAVFDTMRHIRPDVSTVCVGLAASMGAFLLSAGTKGKRYSLPNSRIMIHQPLGGAQGGQSDIEIQANEMLHHKANLNGYLAYQTGQSLDRINQDTDRDFFMSAKEAKEYGLIDGVIMNPMKALQPLAAAAEQS	8	60	8	27.48	0.177205	63	5	3	8	'19.4.2.9.1'	'Protein homeostasis.proteolysis.serine-type peptidase activities.chloroplast Clp-type protease complex.proteolytic core component *(ClpP1/3-6)'	'mercator4v5.0: proteolytic core component *(ClpP1/3-6) of chloroplast Clp-type protease complex & swissprot: ATP-dependent Clp protease proteolytic subunit 5, chloroplastic & original description: ATP-dependent Clp protease proteolytic subunit (AHRD V1 ***- Q93YH0_SOLLC); contains Interpro domain(s) IPR018215 Peptidase S14, ClpP, active site'	Cp	3	Cp	Cp	Cp	Cp	100	plastid stroma	plastid	plp_at_01015; plp_at_01276; plp_at_02385	Cp	0.99	0	No	Detected by both ITAG and Atlas
Solyc01g100650	SUPPRESSOR OF QUENCHING 1	SOQ1	At1g56500	XP_004230317.1	MALRLTPFLLPTYGKPKLAALFNSRSELSIQFLSKNFRMLDFESRKMGLKVSASQKLEEKNVPESGSQWGKVSAVLFDMDGVLCNSEESSRKAAVDVFAEMGVQVTVEDFVPFMGMGEANFLGGVAAAKGVEGFDTEAAKKRFFEIYLSKYAKPNSGIGFPGAFELVSQCKSSGLKVAVASSADRIKVDANLAAAGLPITMFDAIVSADAFKNLKPAPDIFLAASRILDVPTSECIVIEDALAGVQAAKAAKMRCIAVTTTLSEDTLNAAEPSLIRKEISDISLEDILNGGSGSHNVMVQESQSINDLALSFPEPNMTGSITELDNYVTSGAISSMGGVQVTRRNVVRYGSLGIAASCLLFTITNWKAMQYASPKAIWNLLFGTGNPPFEQKEDASSSQ…	14	68	14	1.276	0.00822831	746	5	3	8	'1.1.1.5.3.2.2'	'Photosynthesis.photophosphorylation.photosystem II.photosynthetic acclimation.non-photochemical quenching (NPQ).qH-type antenna quenching.regulatory protein *(SOQ1)'	'mercator4v5.0: regulatory protein *(SOQ1) of non-photochemical quenching & swissprot: Protein SUPPRESSOR OF QUENCHING 1, chloroplastic & original description: NHL repeat containing 2 (AHRD V1 *--- B2RR26_MOUSE); contains Interpro domain(s) IPR011042 Six-bladed beta-propeller, TolB-like'	M	3	Cp	possibly M	Cp	ER	87.8	thylakoid-peripheral-stromal-side	plastid	plp_at_02495	Cp	0.48	0.04	No	Detected by both ITAG and Atlas
Solyc01g102820	2-C-methyl-D-erythritol 4-phosphate cytidylyltransferase (AHRD V1 ***- A9ZN09_HEVBR); contains Interpro domain(s) IPR001228 4-diphosphocytidyl-2C-methyl-D-erythritol synthase	MCT	At2g02500	XP_010314187.1	MSTLQLGIILSSSSPMFLASNSHIPKNVLPSISLFPTYFVKNPCRRTYSHADPRRGLFKISCSSTSENLNKESDVVVVEEKSVSVILLAGGKGKRMGASMPKQYLPLLGQPIALYSFYTFSKMPQVKEIIVVCDPSYQDIFEDAKEYIQVDLKFALPGKERQDSVYSGLQEVDSNSKLACIHDSARPLVQIEDVEKVLKDGWLVGAAVLGVPAKATIKEANSESFVVKTLDRKTLWEMQTPQIIKPELLKKGFELVNREGLEVTDDVSIVEHLKHPVYITEGSYTNIKVTTPDDLLLAERILNIEES	12	77	12	7.66	0.0493957	212	5	3	8	'9.1.2.4'	'Secondary metabolism.terpenoids.methylerythritol phosphate (MEP) pathway.4-diphosphocytidyl-2-C-methyl-D-erythritol synthase'	'mercator4v5.0: 4-diphosphocytidyl-2-C-methyl-D-erythritol synthase & swissprot: 2-C-methyl-D-erythritol 4-phosphate cytidylyltransferase, chloroplastic & original description: 2-C-methyl-D-erythritol 4-phosphate cytidylyltransferase (AHRD V1 ***- A9ZN09_HEVBR); contains Interpro domain(s) IPR001228 4-diphosphocytidyl-2C-methyl-D-erythritol synthase'	Cp	2	Cp	Cp	Cp	Cp	99.1	plastid stroma	plastid	plp_at_02509	Cp	0.98	0.01	No	Detected by both ITAG and Atlas
Solyc01g102950	Lycopene beta/epsilon cyclase protein [At2g32640], manual annotation	LYCB	At2g32640	XP_004230408.1	MALQLQLQTTVRNGVFQYPSAIRPFGNRKRVSFQAQATPTRTQRIMEGIAVSGEVGGAGGAYSYTALKRLDQLLSKICSASAVVEEPQKVVFSVPGSYKDSEHVGNSEEMFDVIVCGGTLGIFIATALSSKGLRVGVVERNVLKGREQEWNISRKELLELVEVGVLTEDDIEEATAASFNPNRCGFEGKGDIWVQGILNLGVSPVKLVEIVKDRFDSLGGVTFEGYSVSNISVYQDAAVLQLKEGKTLFSRLIIDAMGNFSPIVKQIRCGRKPDGMCLVVGTCCRGFKENSTSDVIFSSATAKEVGQSLVQYFWEAFPAGSGPIDRTTYMFTYVDPQPGSPQLEELLEDYWDLMPKYQGVSFDDLEILRIIFGIFPTYRDSPLPAAFDRILQFGDASGI…	2	4	2	0.245	0.00157989	1090	2	0	2	'35.2'	'not assigned.not annotated'	'mercator4v5.0: not classified & original description: FAD dependent oxidoreductase (AHRD V1 **-- B5VX05_SPIMA)'	M	4	Cp	Cp	Cp	M	44.9	thylakoid	plastid	-	Cp	0.58	0.01	No	Detected by both ITAG and Atlas
Solyc01g103100	NADPH-dependent pterin aldehyde reductase	PTALR	At1g10310	XP_004230419.1	MAIAGTTPSSPFLGHVPFHIGKSSFAQFTHHSLFRGSKTTVKVLLPLGKFTSIWFPQSQRFRQRSRIHATGNPSMRSAGGAIRTLLITGVSRGLGKALALELAKRGHYIIGCARSQDKLNAFQTELASSTNPPSENKHLLMSVDVSLNSSVEEFARAVMEKKGVPDIIVNCAGTINRNNKLWEVPAEEFDSVIDTNLKGTANVLRYFIPLMLEKKQGVIVNMSSGWGRSGAAQVAPYCASKWAIEGLTASVAKELPPGMAAVALNPGVIYTDMLQSCFGNSASLYQTPESWAPKAANMILNLTMADNGASLSV	6	27	6	1.512	0.00975016	689	5	3	8	'7.5.10.2'	'Coenzyme metabolism.tetrahydrofolate metabolism.pterin regeneration.pterin aldehyde reductase'	'mercator4v5.0: pterin aldehyde reductase & swissprot: NADPH-dependent pterin aldehyde reductase & original description: Short-chain dehydrogenase/reductase SDR (AHRD V1 ***- A6C8Y5_9PLAN); contains Interpro domain(s) IPR002347 Glucose/ribitol dehydrogenase'	Cp	2	Cp	Cp	Cp	Cp	99.6	plastid stroma	-	-	Cp	0.84	0.07	No	Detected by both ITAG and Atlas
Solyc01g103110	Unknown Protein (AHRD V1); contains Interpro domain(s) IPR007434 Protein of unknown function DUF482	-	At2g23390	XP_004230420.1	MAITGALPSSPFLGHVPFYLGKSSSTHFTHNSVCIFKVKALFWGSRRSVKPADKVLSLGEFTLSEADSLGNTGTPEKISVSVVSSIAEVSPDNWDSCSLDATGHQQFNPFLSHGFLSSLEESGSAVEGTGWIPQHIIAEDASKNILGVVPLYLKSHSYGEYVFDNSWANAYYNYGLSYYPKLQCSVPFTPVTGPRILVRNTSHRDQVFDILVSALKDLAAKFKVSSLHITFPTSNEWNKLEEKGFLQRTGMQYHWKNRNYKNFDEFLMDMKQSKRKNIRQERKKISAQNVTMKRLRGHEIKASHWDTFYKFYRNTTDNKWGTAYLTRDFFHRMGAKMGDNVLLVVAEEGDELVAAALNFIGGDTLYGRLWGCLPGTYYANLHFEACYYQAIDAAIELNL…	3	9	3	0.54	0.0034822	971	5	3	8	'35.2'	'not assigned.not annotated'	'mercator4v5.0: not classified & original description: Unknown Protein (AHRD V1); contains Interpro domain(s) IPR007434 Protein of unknown function DUF482'	Cp	4	Cp	possibly Cp	Cp	Cp	95.8	plastid	-	-	Cp	0.86	0.05	No	Detected by both ITAG and Atlas
Solyc01g103440	Phosphoribosylamine--glycine ligase (AHRD V1 ***- D7KJV0_ARALY); contains Interpro domain(s) IPR000115 Phosphoribosylglycimide synthetase	PUR2	At1g09830	XP_004230444.1	MACMSLNIGAASALKFVSNSQNHPVKLFSAKEQRCSNFSSSNWGCFSLRVRRSSCLRFDTQKSFAVFNSLPVDNSNPKESVVVLVIGGGGREHALCHALRRSPSCDAIFCAPGNAGISSSGDATCISDLDVLDSSAVIAFCRKWGVGLVVVGPEAPLVAGLANDLVKEGIPTFGPSSEAAALEGSKNFMKSLCDKYGIPTAKYQAFTDPSAAKEYIKQEGAPIVVKADGLAAGKGVIVAMTLEQAYEAVDSMLVDNVFGSAGSRVIVEEYLEGEEASFFALVDGEHAIPLESAQDHKRVGDGDTGPNTGGMGAYSPAPVLTKELQSMVMESIIFPTVKGMAEEGCKFVGVLYAGLMIEKKSGLPKLIEYNVRFGDPECQVLMVRLESDLVEILLAACHG…	7	31	7	1.565	0.0100919	683	5	3	8	'6.1.1.2'	'Nucleotide metabolism.purines.ribonucleotide (RN) anabolism.glycinamide RN synthetase *(GARS)'	'mercator4v5.0: glycinamide RN synthetase *(GARS) & swissprot: Phosphoribosylamine--glycine ligase, chloroplastic & original description: Phosphoribosylamine--glycine ligase (AHRD V1 ***- D7KJV0_ARALY); contains Interpro domain(s) IPR000115 Phosphoribosylglycinamide synthetase'	Cp	1	Cp	Cp	Cp	Cp	100	plastid stroma	plastid	plp_at_00026	Cp	0.85	0.03	No	Atlas only
Solyc01g103450	Chaperone DnaK (AHRD V1 ***- Q1SKX2_MEDTR); contains Interpro domain(s) IPR012725 Chaperone DnaK	HSC70-2	At5g49910	XP_004230445.1	MASSTAQIHALGATYFANSSSSTRKPLKSVFLGQKLNNRTLAFGLKQKKSRGNNGGYAPMRVVAEKVVGIDLGTTNSAVAAMEGGKPTIVTNAEGQRTTPSVVAYTKSGDRLVGQIAKRQAVVNPENTFFSVKRFIGRKMNEVDEESKQVSYNVIRDENGNVKLDCPAIGKSFAAEEISAQVLRKLVDDASKFLNDKVSKAVVTVPAYFNDSQRTATKDAGRIAGLEVLRIINEPTAASLAYGFEKKSNETILVFDLGGGTFDVSVLEVGDGVFEVLSTSGDTHLGGDDFDKRIVDWLAASFKRDEGIDLLKDKQALQRLTETAEKAKMELSSLTQTNISLPFITATADGPKHIETTITRGKFEELCSDLLDRLKTPVQNSLRDAKLSFSDIDEVILVG…	41	493	31	58.078	0.374517	33	5	3	8	'19.1.4.1'	'Protein homeostasis.protein quality control.plastidial Hsp70 chaperone system.chaperone *(cpHsc70))'	'mercator4v5.0: chaperone *(cpHsc70)) & swissprot: Stromal 70 kDa heat shock-related protein, chloroplastic & original description: Chaperone DnaK (AHRD V1 ***- Q1SKX2_MEDTR); contains Interpro domain(s) IPR012725 Chaperone DnaK'	Cp	1	Cp	Cp	Cp	Cp	60	plastid stroma	plastid	plp_at_00563; plp_at_01596; plp_at_02441	Cp	1	0	No	Detected by both ITAG and Atlas
Solyc01g103710	NifU DOMAIN PROTEIN 2	NFU2	At4g25910	XP_004230462.1	MQSAMLLNPPTPSSSYVSRSFQTLDSPSSSSSCSPSSSTATLFLPPLPLEISGFFGTRVSSWTRPNSSPRSLRRASQFRVVKAVATPNSAVEPNSSLELPLTSENIESVLDEIRPYLISDGGNVALHEIDGNVVKLKLQGACGSCPSSVTTMKLGIERRLMEKIPEIVAVEAVPDEETGLELNEENIEKVLEEIRPYLVGAAGGSLELVAIEEPIVKVRITGPAAGVMTVRVAVTQKLREKIPSIAAVQLLQ	1	3	1	0.585	0.00377238	943	3	0	3	'7.12.1.2.2'	'Coenzyme metabolism.iron-sulfur cluster assembly machinery.plastidial SUF system.transfer phase.scaffold protein *(NFU1/2/3)'	'mercator4v5.0: scaffold protein NFU of plastidial SUF system transfer phase & swissprot: NifU-like protein 2, chloroplastic & original description: Fe/S biogenesis protein nfuA (AHRD V1 *--- NFUA_BUCCC); contains Interpro domain(s) IPR001075 NIF system FeS cluster assembly, NifU, C-terminal'	Cp	1	Cp	Cp	Cp	M	78.8	plastid stroma	plastid	-	Cp	0.970812	0.000366	No	Detected by both ITAG and Atlas
Solyc01g103750	ATP phosphoribosyltransferase (AHRD V1 **** O46887_THLGO); contains Interpro domain(s) IPR001348 Histidine biosynthesis HisG: ATP phosphoribosyltransferase	HIS-N1B	At1g09795	XP_004230464.1	MTAIQTFFLQGSVSTLLSSQSSVTSCRKVSVKFTVSCCSATSPLAVVNGNVEKRPSDRTEVRIGLPSKGRMAADSLDLLKDCQLSVRQVNPRQYVAEIPQIPNLEVWFQRPKDIVRKLVAGDLDLGIVGLDTVCEYGQGDEDLIIVHDALEYGDCRLSLAIPKYGIFENVNSMKELAEMSQWTPERPLRVATGFTYMGPKFMKENGLKHVTFSTADGALEAAPAMGIADAIVDLVSSGTTLRENNLKEIEGGVIVQSQAVLVAGRKSLMQRKGALDITHEMLERLEAHLRAVGQFTVTANMRGSSAEEVAERILSQTSLSGLQGPTISPVFCKHDGRVTANYFAIVICVPKKALYKSVQQLRAIGGSGVLISPLTYIFDEETPRWRQLLSTLGL	9	48	9	7.577	0.0488604	215	5	3	8	'4.1.2.2'	'Amino acid metabolism.glutamate group amino acid biosynthesis.histidine.ATP phosphoribosyl transferase'	'mercator4v5.0: ATP phosphoribosyl transferase & swissprot: ATP phosphoribosyltransferase 2, chloroplastic & original description: ATP phosphoribosyltransferase (AHRD V1 **** O46887_THLGO); contains Interpro domain(s) IPR001348 Histidine biosynthesis HisG: ATP phosphoribosyltransferase'	Cp	2	Cp	Cp	Cp	Cp	53.8	plastid stroma	plastid	-	Cp	0.96	0.01	No	Detected by both ITAG and Atlas
Solyc01g103950	Thiamine-phosphate pyrophosphorylase/thiamine-phosphate pyrophosphorylase (AHRD V1 **-- A9NB66_COXBR); contains Interpro domain(s) IPR004399 Phosphomethylpyrimidine kinase type-2	TH1	At1g22940	XP_004230476.2	MAHLCSQVLSTSFFTPKPQIPVLLSPGVACIKSFHQYRFLHVKAMQDGKFATPTSCDESKVRVPHVLTVAGSDSGAGAGIQADIKACAARGVYCSTVITAVTAQNTVGVQGVNIVPEDFVAEQLRSVLSDMPPNVVKTGMLPSTGIVKTLCQSLKEFPVQALVVDPVMVSTSGHTLAGPSILDSFREELLPMADIVTPNLKEASALLGGVPLETIADMRSAAKAIHDIGPRNVLVKGGDLPASLDAVDVFYDGNDFYEFRSSRIMTPNTHGTGCTLASSVAAELAKGSQMLSAVKVAKRYVEAVLSYSKNIAIGGGCQGPMDHLLKLKSNVQRRRFDPSDLFLYAVTDSRMNKKWGRSIVDAVKAAIEGGASIIQLREKEVETGDFLEAAKACLKICRV…	4	16	4	0.778	0.00501695	866	5	1	6	'50.2.7'	'Enzyme classification.EC_2 transferases.EC_2.7 transferase transferring phosphorus-containing group'	'mercator4v5.0: EC_2.7 transferase transferring phosphorus-containing group & swissprot: Thiamine biosynthetic bifunctional enzyme TH1, chloroplastic & original description: Thiamine-phosphate pyrophosphorylase/thiamine-phosphate pyrophosphorylase (AHRD V1 **-- A9NB66_COXBR); contains Interpro domain(s) IPR004399 Phosphomethylpyrimidine kinase type-2'	Cp	5	Cp	Cp	Cp	Cp	99.7	plastid; mitochondria	plastid	-	Cp	0.96	0.03	No	Detected by both ITAG and Atlas
Solyc01g105020	Phosphatase PTC7 homolog (AHRD V1 *-*- C1BT38_9MAXI); contains Interpro domain(s) IPR001932 Protein phosphatase 2C-related	PP2C62	At4g33500	XP_004230532.1	MADSLCKFLDGRCITGSQFFATYFSAQKPFLFPTLVRRKRRRKSLHIAFCSTPISTNLDVVSTHEHSDGTLLFRFGDPREIAKEDELEEPLLDSEEEFSVVKVLDGDNEREVIVKKVEREARGEAVTVVTDAGVSESVVIGNGRNDLVEVETGLSKNFLGDSAVEIGSFSPEGIQNESVAEVDIENAVHVEEIFEKKDDSEASVPPPPENSITSLEVEEEMMGQTSDESFEELDDDKSLVLSSPTAMPVYSDLVNTKEIEEFEGEGSSQLTENDGDKDCCYDSTHSKENGAASADIEAAHNDIEIVQQIEQISENIGSILEGSTESVPEGINLGNAKTVADEISPENAPEGINLGNTETVGDEISPDNAPEGINLGNTEAVVDEISSDNAPEGIDKGNT…	7	18	7	2.162	0.0139417	563	5	2	7	'35.1'	'not assigned.annotated'	'mercator4v5.0: not classified & swissprot: Probable protein phosphatase 2C 71 & original description: Phosphatase PTC7 homolog (AHRD V1 *-*- C1BT38_9MAXI); contains Interpro domain(s) IPR001932 Protein phosphatase 2C-related'	Cp	5	Cp	none	Cp	C	71.8	stroma	plastid	plp_at_00463	Cp	0.62	0.01	No	Detected by both ITAG and Atlas
Solyc01g105060	Uncharacterized protein in the thioesterase superfamily protein	-	At5g10160	XP_004230623.1	MASMALSQSVFSTPTSQRFENASFPLPSSMVKQSLVTFRSHSLSTHCKKIRNSVITNCAAPDNDSKIETPIELRYPAFPTVMDINQIREVLPHRFPFLLVDRVIEYNPGVSAVAIKNVTINDNFFPGHFPERPIMPGVLMVEAMAQVGGLVMLQPEVGGSKQNFFFAGIDKVRFRKPVIAGDTLVMRMTLIKLQKRFGIAKMEGKAYVGGDVVCEGEFLMATGSE	9	78	9	16.783	0.108225	99	5	3	8	'5.1.4.3'	'Lipid metabolism.fatty acid metabolism.plastidial fatty acid synthase (ptFAS) system.hydroxyacyl-ACP dehydratase *(ptHD))'	'mercator4v5.0: hydroxyacyl-ACP dehydratase *(ptHD)) & original description: (3R)-hydroxymyristoyl- (AHRD V1 ***- Q9LX13_ARATH); contains Interpro domain(s) IPR010084 Beta-hydroxyacyl-(acyl-carrier-protein) dehydratase FabZ'	Cp	1	Cp	Cp	Cp	Cp	97	plastid stroma	plastid	-	Cp	1	0	No	ITAG only
Solyc01g105170	Copper-exporting P-type ATPase A (AHRD V1 *-*- COPA_STAHJ); contains Interpro domain(s) IPR001757 ATPase, P-type, K/Mg/Cd/Cu/Zn//Ca//H-tRNAansporter	-	At5g21930	XP_025883792.1	MESSLLTSPAAISRLAASRTVNCNCSPLISQFHRHFSTRSTQFVLMSQLARFHLRAVCNGEVRGLNRFGSVSLSGSLAAANLRPVQKDLRSVSRSAASFAASGGGNDNPRGNGGGGGGNGDGATDGGKENPSVVAETGEDISALSSDVIILDVTGMTCGGCASSVKRILESQPQVSSATVNLTTETAIVWPVSDAKVVPNWQKQLGEALAKHLSTCGFKSNVRGEGAIEGEFPS	1	7	1	0.259	0.00167017	1081	4	1	5	'35.1'	'not assigned.annotated'	'mercator4v5.0: not classified & swissprot: Copper-transporting ATPase PAA1, chloroplastic & original description: Copper-exporting P-type ATPase A (AHRD V1 *-*- COPA_STAHJ); contains Interpro domain(s) IPR001757 ATPase, P-type, K/Mg/Cd/Cu/Zn/Na/Ca/Na/H-transporter'	Cp	3	Cp	Cp	Cp	Cp	99.5	thylakoid-integral	plastid	-	Cp	0.78	0.03	No	Atlas only
Solyc01g105340	chaperone protein dnaJ A7A, chloroplastic-like	DJA6	At2g22360	XP_004230549.1	MLANQKSKAVTYRKLARSYHPDVNKEPGAEQKFKEISNAYEVLSDDEKRSIYDKYGEAGLKGAGAGMGDFSNAFDLFESLFDGFGGMGGMGGMGGRGSRSRATEGEDQGYNLVLNFKEAVFGVEKEIEISRLETCGTCDGSGAKPGTKPSTCNTCGGQGQVVSSARTPLGVFQQVTTCSSCGGTGEISTPCGTCNGDGRVRKSKRISLKVPPGVDSGSRLRVRSEGNAGRRGGPPGDLFVMIEVLPDPVLKRDDTNILYNCKVSYIDAILGTTMKVPTVDGMVDLKIPAGTQPGTTLVMAKKGVPFLSKPNMRGDQLVRVQVEIPKRLSSEERKLIEELANLNKPKAATNSKR	8	36	8	2.981	0.019223	461	5	1	6	'19.1.4.2'	'Protein homeostasis.protein quality control.plastidial Hsp70 chaperone system.co-chaperone *(Hsp40)'	'mercator4v5.0: co-chaperone *(Hsp40) & swissprot: Chaperone protein dnaJ A7A, chloroplastic & original description: Chaperone protein dnaJ (AHRD V1 ***- B6TAJ2_MAIZE); contains Interpro domain(s) IPR012724 Chaperone DnaJ'	M	4	-	possibly M	Cp	M	60.03	thylakoid	plastid	-	-	0	0	No	ITAG only
Solyc01g105390	Phospho-2-dehydro-3-deoxyheptote aldolase 2 (AHRD V1 ***- B6UAK5_MAIZE); contains Interpro domain(s) IPR002480 DAHP synthetase, class II	DHS2	At4g33510	XP_019067386.1	MKGKLEIINSKWFLNRVSHKMDPNELVKLIDILNPQNRPGRITVIARMGADNMRVKLPHLIRAIRGAGQIVTWVSDPMHGNTTKAPCGLKTRSFDSIRAEVRAFFDVHDQEGSYPGGVHLEMTGQNVTECVGGSQTITYNDLSSRYHTHCDPRLNASQALNLPLLLRSASGKEDWVLSLGFRKPILLPFH	3	14	2	0.701	0.00452041	903	5	3	8	'4.5.1.1'	'Amino acid metabolism.shikimate group amino acid biosynthesis.shikimate pathway.3-deoxy-D-arabino-heptulosonate 7-phosphate (DAHP) synthase'	'mercator4v5.0: 3-deoxy-D-arabino-heptulosonate 7-phosphate (DAHP) synthase & swissprot: Phospho-2-dehydro-3-deoxyheptonate aldolase 2, chloroplastic & original description: Phospho-2-dehydro-3-deoxyheptonate aldolase 2 (AHRD V1 ***- B6UAK5_MAIZE); contains Interpro domain(s) IPR002480 DAHP synthetase, class II'	-	3	-	none	not Cp	Cp	99.7	plastid	plastid	-	-	0	0	No	Detected by both ITAG and Atlas
Solyc01g105420	Phospho-2-dehydro-3-deoxyheptote aldolase 2 IPR002480 DAHP synthetase, class II	DHS2	At4g33510	XP_004230644.2	MDPNELVKLIDILNPQNRPGRITVIARMGADNMRVKLPHLIRAIRGAGQIVTWVSDPMHGNTTKAPCGLKTRSFDSIRAEVRAFFDVHDQEGSYPGGVHLEMTGQNVTECVGGSRTITYNDLSSRYHTHCDPRLNASQALELAFIIAERLRKRRLGPKFGF	5	49	2	2.511	0.0161922	521	5	3	8	'4.5.1.1'	'Amino acid metabolism.shikimate group amino acid biosynthesis.shikimate pathway.3-deoxy-D-arabino-heptulosonate 7-phosphate (DAHP) synthase'	'mercator4v5.0: 3-deoxy-D-arabino-heptulosonate 7-phosphate (DAHP) synthase & swissprot: Phospho-2-dehydro-3-deoxyheptonate aldolase 2, chloroplastic & original description: Phospho-2-dehydro-3-deoxyheptonate aldolase 2 (AHRD V1 ***- B6UAK5_MAIZE); contains Interpro domain(s) IPR002480 DAHP synthetase, class II'	-	4	-	none	not Cp	Cp	98.78	plastid	plastid	-	-	0	0	No	Detected by both ITAG and Atlas
Solyc01g105560	3 4-dihydroxy-2-butanone 4-phosphate synthase (AHRD V1 ***- D7CLR6_SYNLT); contains Interpro domain(s) IPR000422 NADHBP synthase RibA1	RIBA1	At5g64300	NP_001234776.2	MASINISFPSTTFHSRSQANFKLFSGLHSGDVVSLNGVSSGSFIRLNARPHLTIKSDFKITSALLSGEGDIRFQSRGEKTLFSSLSTGTETQPDAVTFATLEADGVPTTSGFLSDDDECDLDRPTEGFSSVPEAIEDIRQGKMVLVTDDEDRENEGDLVMAASKATPEAMAFFVKYGTGIVCVSMTEEHLERLQLPLMVNDKKNEEKLCTAFTVSVDAKHGTTTGVSAHDRATTVLALASGDSKPEDFNRPGHIFPLKYREGGVLKRAGHTEASVDLAVLAGLDPVGVICEVVDDDGSMARLPMLRQFAKEHNLKIISVADLIRYRRKTDQLVEHASAARIPTMWGPFTAHCFKSIIDGIEHIAMVKGDIGDGQDILVRVHSECLTGDIFGSARCDCGS…	13	44	13	2.728	0.0175916	488	5	3	8	'7.10.3'	'Coenzyme metabolism.FMN/FAD biosynthesis.bifunctional GTP cyclohydrolase II *(RibA) and DHBP synthase *(RibB)'	'mercator4v5.0: bifunctional GTP cyclohydrolase II *(RibA) and DHBP synthase *(RibB) & swissprot: Bifunctional riboflavin biosynthesis protein RIBA 1, chloroplastic & original description: 3 4-dihydroxy-2-butanone 4-phosphate synthase (AHRD V1 ***- D7CLR6_SYNLT); contains Interpro domain(s) IPR000422 DHBP synthase RibB'	Cp	1	Cp	Cp	Cp	Cp	100	stroma	plastid	-	Cp	0.91	0.03	No	Detected by both ITAG and Atlas
Solyc01g105890	Linalool synthase (NCBI); ; contains Interpro domain(s) IPR005630 Terpene synthase, metal-binding domain	MTS1 TPS5	At3g25810	NP_001233805.1 Q1XBU5.1 Falara et al (2011)	MVSILSNIGMMVVTFKRPSLFTSLRRRSANNIIITKHSHPISTTRRSGNYKPTMWDFQFIQSLHNPYEGDKYMKRLNKLKKEVKKMMMTVEGSHDEELEKLELIDNLERLGVSYHFKDEIMQIMRSINININIAPPDSLYTTALKFRLLRQHGFHISQDILNDFKDENGNLKQSICKDTKDILNSSKDEHDNLKQSTCNNTKGLLKLYEASFLSIENESFLRNTTKSTLAHLMRYVDQNRCGEEDNMIVELVVHALELPRHWMVPRLETRWYISIYERMSNANPLLLELAKLDFNIVQATHQQDLRILSRWWKNTGLAEKLPFSRDILVENMFWAVGALFEPQHSYFRRLITKVIVFISIIDDIYDVYGTLDELELFTLAIQRWDTKAMEQLPDYMKVC…	1	1	1	0.075	0.000483639	1228	1	0	1	'9.1.4.2'	'Secondary metabolism.terpenoids.terpene biosynthesis.mono-/sesquiterpene-/diterpene synthase'	'mercator4v5.0: mono-/sesquiterpene-/diterpene synthase & swissprot: (R)-linalool synthase TPS5, chloroplastic & original description: (E)-beta-ocimene synthase (AHRD V1 **** Q5CD81_CITUN); contains Interpro domain(s) IPR005630 Terpene synthase, metal-binding domain'	Cp	4	Cp	possibly Cp	Cp	C	92.8	-	-	-	Cp	0.46	0.01	No	Detected by both ITAG and Atlas
Solyc01g105990	Executer 1	EX1	At4g33630	XP_004230540.1	MASITPPPTFDVNTHKFNFSNPKFTSRLKRSSSSFTLSTSHLLSRVSGSAFCCRCRNGTGDGETVEPSPSVSSQNSSSSSSSWRWDLAFQDAVKNAMKKLDDYVNWSKGVGLDERKSEIGVDDQEWDWERWKKHFSEVEEEERLVSVLKAQLAHAISREDYEDAARLKVAIAAAATKDIVGRVMSHVNKALEEERYRDAAFMRDCAGTGLVGWWAGTSQDVSDPYGRIIRISAEHGRYVARSYSPRQLASTVEGAPLFEIFLTVDNKGEYRQQAVYLKRKPVQQDLPISSSKLPGASSNLDTVGPTENKSDMFDKISDAEEDGEDREDDFGFQNALKDMIPGVQVKVLKVTAPGKVDRDLISKVIEQIMDEEDEDEEKDYDLDSVDDEDEIKVERDGEQ…	2	2	2	0.122	0.000786719	1186	2	0	2	'10.6.4.1'	'Redox homeostasis.reactive oxygen-induced signalling.singlet oxygen-induced signalling.plastidial regulatory protein *(EXECUTER)'	'mercator4v5.0: plastidial regulatory protein *(EXECUTER) of singlet oxygen-induced signalling & swissprot: Protein EXECUTER 1, chloroplastic & original description: Os01g0107900 protein (Fragment) (AHRD V1 *-*- Q0JRC9_ORYSJ)'	Cp	1	Cp	Cp	Cp	N	37.9	thylakoid	-	-	Cp	0.72	0	No	Detected by both ITAG and Atlas
Solyc01g106010	Fructose-1 6-bisphosphatase class 1 (AHRD V1 ***- D3PE46_DEFDS); contains Interpro domain(s) IPR000146 Fructose-1,6-bisphosphatase	FBP-like	At5g64380	XP_004230574.1	MASSPFSGGLINSRVDSPIAIGCKNASVDSANSGFSTLMEYMGKGGVDVGDDLVLLFGHLEYASKKIAALVACPFNSSLNNNVAIGNTGTSSDRDKPKPLDIVSNEIILSSLRNSGKVAVMASEEDECPVWITDDGPFVVVMDPLDGSRNIDASIPTGTIFGIYRRLVEIDHLPVEEKALLNCLQSGSKLVAAAYVLYSSATILCASFGSGTHAFTLDHTTGDFLLTHPNINIPPRGQIYSVNDARYFDWPEGLRQYIDTIRQGKGQHPKKYSARYICSLVADFHRTLLYGGVAMNPRNHLRLVYEANPLSFLAEKAGGRGSDGKNRILSIQPVKLHQRLPLFLGSLEDIEELQSYGDVQQKVNPGYDV	5	12	5	1.894	0.0122135	618	5	3	8	'50.3.1'	'Enzyme classification.EC_3 hydrolases.EC_3.1 hydrolase acting on ester bond'	'mercator4v5.0: EC_3.1 hydrolase acting on ester bond & swissprot: Fructose-1,6-bisphosphatase, chloroplastic & original description: Fructose-1 6-bisphosphatase class 1 (AHRD V1 ***- D3PE46_DEFDS); contains Interpro domain(s) IPR000146 Fructose-1,6-bisphosphatase'	-	3	-	none	Cp	Cp	96.6	stroma	plastid	-	-	0	0	No	Detected by both ITAG and Atlas
Solyc01g106090	PSBP-DOMAIN PROTEIN1 associated with PSI	PPD1 PSB27-like	At4g15510	XP_004230618.1	MRVLQASNIYGVGFGIPSISTRPNSSYHRHATIATGEALAKSAPIGRKFSEQHSLKKGDMEKEGNSVVLEKKDFAVPRRKAMALILSSFVLSNYELPKVAYAQSVEFREYIDTFDGYSFMYPRNWIQVRGAGADIFFRDPLVLDENLSVEISSPSSSKYKSVKDLGPPEEAGKGVLKQYLTEFMSTRLGVRRESSVLSTSSRVADDGKLYYDVEVNIKSYANNNELAVMPQDRVARLEWDRRYLSVLGVENNCLYELRIQTPEKVFVQEESDIRAIMNSFRANKIAA	11	68	11	6.079	0.0392005	267	5	3	8	'1.1.4.3.2'	'Photosynthesis.photophosphorylation.photosystem I.assembly and maintenance.assembly factor *(PPD1)'	'mercator4v5.0: protein involved in PS-I assembly *(PPD1) & swissprot: PsbP domain-containing protein 1, chloroplastic & original description: Photosystem II oxygen evolving complex protein PsbP (AHRD V1 *-*- B8HJK6_CYAP4); contains Interpro domain(s) IPR002683 Photosystem II oxygen evolving complex protein PsbP'	M	3	-	none	Cp	Cp	100	thylakoid-peripheral-lumenal-side	plastid	plp_at_00414; plp_at_01241; plp_at_01673; plp_at_01945; plp_at_02600	M	0.09	0.28	No but known to be lumenal	Detected by both ITAG and Atlas
Solyc01g106430	Inorganic pyrophosphatase family protein (AHRD V1 **** D7M262_ARALY); contains Interpro domain(s) IPR008162 Inorganic pyrophosphatase	PPA6A	At5g09650	XP_004230656.1	MAAARIMVSASNTLTASLLSKGPLRRPNNFSLCFRNGPVQKKRLFTCSAIYNPQIQTIEEGQPETLDYRVFFADNSGKKISPWHDIPLHLGDGVFNFVVEIPKESSAKMEVATDEQHTPIKQDTKKGKLRYYPYNIHWNYGLLPQTWEDPTFANTEVEGALGDNDPVDVVEIGDSRGKIGQVLKVKPLAALAMIDEGELDWKIVAISLDDPRASLVNDVDDVEKHFPGTLTAIRDWFRDYKIPDGKPANRFALGNKPANKDYALKIITETNESWAKLVKRSIAAGELSLV	11	175	10	60.054	0.387259	32	5	3	8	'27.7.2'	'Multi-process regulation.pyrophosphate homeostasis.plastidial pyrophosphatase'	'mercator4v5.0: plastidial pyrophosphatase & swissprot: Soluble inorganic pyrophosphatase 6, chloroplastic & original description: Inorganic pyrophosphatase family protein (AHRD V1 **** D7M262_ARALY); contains Interpro domain(s) IPR008162 Inorganic pyrophosphatase'	Cp	3	Cp	Cp	Cp	M	59.8	thylakoid-peripheral-stromal-side; plastid stroma	plastid	plp_at_01544; plp_at_02448	Cp	0.78	0	No	Atlas only
Solyc01g106740	Aspartyl-tRNA synthetase (AHRD V1 **** D8FUD3_9CYAN); contains Interpro domain(s) IPR004524 Aspartyl-tRNA synthetase, class IIb, bacterial/mitochondrial type	AspRS	At4g33760	XP_004230674.1	MSLFFRSLPTIAIRSKPSPLTSLPFFFINFHNPITHNPTSLINRTLSSTSVSASPTTPETVVVPNPKVSPSPNALQWVSRNQYCGELSEEDVGKRVRLCGWVALHRIHGGLTFVNLRDQTGIVQITTLPDDFPDAHSTVRDLRLEYVVAIEGVVRPRPAESVNKKMKTGTIEVAAEDVQVLNAVRLKLPFLVTTADDAKDSSKEEIRLRYRCLDLRRPQMSSNIILRHRVVKLLRRYLEDVHDFVEIETPILSRSTPEGARDYLVPSRVQPGTFYALPQSPQLFKQMLMVSGFDKYYQIARCFRDEDLRADRQPEFTQLDMEMAFTSMEDMLKLNEDLIRKVFQEIQGVQLPNPFPRLTYAEAMSRYGSDRPDTRFDVELRDVSDIFSNTTFKVFSDAL…	15	40	15	3.417	0.0220346	424	5	3	8	'17.2.4'	'Protein biosynthesis.aminoacyl-tRNA synthetase activities.aspartate-tRNA ligase'	'mercator4v5.0: aspartate-tRNA ligase & swissprot: Aspartate--tRNA ligase, chloroplastic/mitochondrial & original description: Aspartyl-tRNA synthetase (AHRD V1 **** D8FUD3_9CYAN); contains Interpro domain(s) IPR004524 Aspartyl-tRNA synthetase, class IIb, bacterial/mitochondrial type'	Cp	2	Cp	M	Cp	M	94.5	plastid stroma; mitochondria	plastid	-	M	0.43	0.01	No	Detected by both ITAG and Atlas
Solyc01g107270	Phosphoribosylformylglycimidine synthase (AHRD V1 ***- A9Y5J1_ARATH); contains Interpro domain(s) IPR010073 Phosphoribosylformylglycimidine synthase, eukaryotes and proteobacteria	PUR4	At1g74260	XP_004233026.1	MLPPLNPLYPFRPQTLASNPKQNTITPVTRSRVWQWQHLLETLLQQSSYKQIVCFGGTLPRLSPIPYSRKNLRLRSHIPAKIRAVVSKDVSSLVNEDSGEFQEVAEKVIHVYGIPFQQDSATAELLKLVQTKISNQIIGETYEPERLGSESFLDGEKRTSVDAYIIEVGPRLSFTTAWSANAVSICQACGLTEINRMDHSNAFASMVHDRMTECVYAEKLSSFKTSIVPEEVRYIPIMEKGRKALEEINEKMGLAFDEQDLKYYTKLFRDDIKRNPTNVELFDIAQSNSEHSRHWFFTGKLVLDGHPVDKTLMQIVKSTLLTNPNNSVIGFKDNSSAIKGFPVKQLRPTQPGSTCSLDVTDRFLDILFTAETHNFPCAVTPYPGAETGAGGRIRDTHAT…	7	23	7	0.341	0.00219894	1047	5	3	8	'6.1.1.4'	'Nucleotide metabolism.purines.ribonucleotide (RN) anabolism.formylglycinamidine RN synthase *(PUR4)'	'mercator4v5.0: formylglycinamidine RN synthase *(PUR4) & swissprot: Probable phosphoribosylformylglycinamidine synthase, chloroplastic/mitochondrial & original description: Phosphoribosylformylglycinamidine synthase (AHRD V1 ***- A9Y5J1_ARATH); contains Interpro domain(s) IPR010073 Phosphoribosylformylglycinamidine synthase, eukaryotes and proteobacteria'	Cp	3	Cp	none	Cp	C	92.3	plastid stroma; mitochondria	mitochondrion,plastid	plp_at_00144; plp_at_02503	-	0.42	0	No	Detected by both ITAG and Atlas
Solyc01g107330	SWIB/MDM2 domain protein (AHRD V1 ***- D6VG39_9BURK); contains Interpro domain(s) IPR019835 SWIB domain	-	At2g14880	NP_001308625.1	MAVSLGLFSVFSTGVTASFAKSDSFSSVRLASPLAAHHVNNLRTVRTVTFATASKPVAEPKKREPRGIMKPRRVSPEMQAFLGGMSEVPRTQALKLIWAHIKANDLQDPQNKKVIICDEKLKTIFGGKERVGFLEIAGLISPHFLK	2	13	2	0.995	0.00641628	810	5	2	7	'12.7.1.1'	'Chromatin organisation.organelle machinery.SWI-B chromatin-remodeling complexes.component *(SWIB)'	'mercator4v5.0: component *(SWIB) of SWI-B chromatin-remodeling complexes & original description: SWIB/MDM2 domain protein (AHRD V1 ***- D6VG39_9BURK); contains Interpro domain(s) IPR019835 SWIB domain'	Cp	2	Cp	Cp	Cp	Cp	99.5	-	plastid	-	Cp	0.99	0	No	Detected by both ITAG and Atlas
Solyc01g107860	Cystathionine β-synthase (CBS) domain-containing protein-like (AHRD V1 ***- B8AP73_ORYSI); contains Interpro domain(s) IPR000644 Cystathionine beta-synthase, core	CBX1A	At4g36910	XP_004230763.1	MESVLNFNSISPICVLNYRLFPTTLSCSPRPLSGDPAVATSRRCLSQRKLSRSLPPASLPSTSANAAASTSNSQSPSDGHYSVGDFMTRKEDLHVVKTTTKVGEALEMLVEKRVTGLPVVDDDWKLVGVVSDYDLLALDSISGAGQADTNLFPDVDSTWKTFNEVQKLLSKTNGKVVGDVMTPSPLSVCENTNLEDAARLLLQTKYRRLPVVDVDGKLVGIITRGNVVRAALQIKRTTDNTN	4	13	4	3.642	0.0234855	399	4	3	7	'10.3.5'	'Redox homeostasis.thiol-based redox regulation.regulatory protein *(LEJ1/2)'	'mercator4v5.0: regulatory protein *(LEJ1/2) of thiol-based redox regulation & swissprot: CBS domain-containing protein CBSX1, chloroplastic & original description: CBS domain-containing protein-like (AHRD V1 ***- B8AP73_ORYSI); contains Interpro domain(s) IPR000644 Cystathionine beta-synthase, core'	Cp	1	Cp	Cp	Cp	Cp	97.9	plastid stroma	plastid	-	Cp	0.83	0	Yes	Detected by both ITAG and Atlas
Solyc01g108020	Thioredoxin m (AHRD V1 ***- B9HS17_POPTR); contains Interpro domain(s) IPR015467 Thioredoxin, core	Trx-m3	At2g15570	XP_004230773.1	MAASASCATPYSKSPSSLSRSLSLQYRELCNLPYKCKQHQNVRIGLSVENDKGFGTWKTSSPSSLRVFCIRDTQAAAVTAKSWDKLILGSDTPVLVEFHATWCGPCQMVHRVIDEIAGEYSGRLKCYVLDADREPKVAENYDIKAVPVVLLFKNGEKFESVIGTMSKEFYVAAIERLLSS	4	22	4	0.848	0.00546834	852	5	3	8	'1.1.1.3.20'	'Photosynthesis.photophosphorylation.photosystem II.assembly.thioredoxin *(TRX-M)'	'mercator4v5.0: thioredoxin *(TRX-M) & swissprot: Thioredoxin M3, chloroplastic & original description: Thioredoxin m (AHRD V1 ***- B9HS17_POPTR); contains Interpro domain(s) IPR015467 Thioredoxin, core'	Cp	2	-	Cp	Cp	Cp	99.8	plastid	plastid	-	Cp	0.91	0.02	No	Detected by both ITAG and Atlas
Solyc01g108070	DJ-1 HOMOLOG C	DJ-1C	At4g34020	XP_004230776.1	MWSAPRIDPITTTAASAPPKKVLVPIGFGTEEMEAVILADVLRRAGAEVTVASVEKQLEVEAYGGTRLVADTFISACSTEIFDLVALPGGMPGSARLRDCEVLQKITSRQAEEKRLYGAICAAPAVALLPWGLLKRKQTTCHPAFIDKISSFRAVKTNTQVSGELTTSRGPGTSFEFAICLVEQLFGEPVAREIGELLLMNPAGDDPKRQEFNEVGWSLDRTPQVLIPIANGSEEIEVVTLIDILRRAKVNVVVASVEKSAQVLASSGTKIVADKLINATSDSIFDLIILPGGTAAAERLHKSKILKKLLKEQESAGRIFGAICSSPAVLQKQGLIKDKKATAHPAVLDKLKDGVNDAQVVIDGKLITSQGLATAIQFALAIVSKLFGHARARSVAEGL…	1	1	1	0.145	0.000935035	1174	1	0	1	'35.1'	'not assigned.annotated'	'mercator4v5.0: not classified & swissprot: Protein DJ-1 homolog C & original description: 4-methyl-5(B-hydroxyethyl)-thiazole monophosphate biosynthesis enzyme (AHRD V1 *-*- C5BNJ2_TERTT); contains Interpro domain(s) IPR006287 DJ-1'	-	3	-	possibly Cp	Cp	P	52.6	plastid	plastid	-	-	0.001504	9e-06	No	Detected by both ITAG and Atlas
Solyc01g108200	protein disulfide-isomerase SCO2 (SNOWY COTYLEDON)	SCO2	At3g19220	XP_010315236.1	MLPLINSCSIFTPLSSSLLPPRRSTVISCQAAADPSAAGGPSSFRWWFNFGAAASAAAAPGFGRNSQNSDEVADNGIGNNIKKKKTKVNAKERRWSRNRESYLADDGDALPLPMTYPDTSPCSPEEIDRRLQCDPIIEDCKQVVYEWTGKCRSCQGTGLVSYYNKKGKETICKCIPCAGIGYVQKITLRTDIDVMVDLDDKPP	1	3	1	0.931	0.00600357	825	3	0	3	'13.5.3.2'	'Cell division.plastid division.thylakoid organisation.chaperone factor *(SCO2/CYO1)'	'mercator4v5.0: thylakoid biogenesis chaperone *(SCO2/CYO1) & swissprot: Protein disulfide-isomerase SCO2 & original description: cDNA clone J013057C16 full insert sequence (AHRD V1 *-*- B7F5R8_ORYSJ)'	Cp	2	Cp	Cp	Cp	Cp	94.6	thylakoid	-	-	Cp	0.61	0.29	No	Detected by both ITAG and Atlas
Solyc01g108600	Presequence protease, mitochondrial (AHRD V1 **-- PREP_DANRE); contains Interpro domain(s) IPR013578 Peptidase M16C associated	PREP1	At1g49630	XP_004230817.1	MERAVLLRSLSSTSTLAFSRIFSRSSHRFASYSARRHRLLQNLQRRRSLVRSNVRGISSSINLKRQFYPLSVRAIATSSPQSSQEFLGADDEVAEKFGFEKVSEQFIDECKSKAVLYKHKKTGAEVMSVSNDDENKVFGVVFRTPPKDSTGIPHILEHSVLCGSRKYPLKEPFVELLKGSLNTFLNAFTYPDRTCYPVASTNTKDFYNLVDVYLDAVFFPKCVEDFQTFQQEGWHYELNDPSDEITFKGVVFNEMKGVYSQPDNLLGRTSQQALFPDNTYGVDSGGDPRVIPSLSFEDFKEFHRKFYHPSNARIWFYGDDDPNERLRILSEYLNMFDASSAPHESRVEPQRLFSEPVRIVEKYPVGEDGDLKKKHMVCVNWLLSDKPLDLETELALGFL…	54	266	54	26.953	0.173807	65	5	3	8	'18.11.2.6'	'Protein modification.targeting peptide maturation.mitochondrion.targeting peptid degrading peptidase *(PreP)'	'mercator4v5.0: targeting peptid degrading peptidase *(PreP) & swissprot: Presequence protease 1, chloroplastic/mitochondrial & original description: Presequence protease, mitochondrial (AHRD V1 **-- PREP_DANRE); contains Interpro domain(s) IPR013578 Peptidase M16C associated'	Cp	4	Cp	Cp	Cp	M	82.1	plastid stroma; mitochondria	mitochondrion,plastid	-	M	0.27	0	No	Detected by both ITAG and Atlas
Solyc01g108630	Nitrite reductase (AHRD V1 ***- Q76KB0_TOBAC); contains Interpro domain(s) IPR006067 Nitrite and sulphite reductase 4Fe-4S region	NIR1	At2g15620	NP_001333834.1	MASFSIKFLAPSLPNPTRFSKSSIVKLNATPPQTVAAAGPPEVAAERLEPRVEEKDGYWILKEQFRQGINPQEKVKIEKEPMKLFMENGIEELAKIPIEEIDQSKLTKDDIDVRLKWLGLFHRRKNQYGRFMMRLKLPNGVTTSAQTRYLASVIRKYGEEGCADITTRQNWQIRGVVLPDVPEILKGLEEVGLTSLQSGMDNVRNPVGNPLAGIDPEEIVDTRPYTNLLSQFITGNSRGNPAVSNLPRKWNPCVVGSHDLYEHPHINDLAYMPAIKDGRFGFNLLVGGFFSAKRCDEAIPLDAWVPADDVVPVCKAILEAFRDLGFRGNRQKCRMMWLIDELGVEGFRAEVVKRMPQQELERASPEDLVQKQWERRDYLGVHPQKQEGYSFIGLHIPVG…	27	179	19	18.307	0.118053	92	5	3	8	'25.1.3.2'	'Nutrient uptake.nitrogen assimilation.nitrate assimilation.nitrite reductase'	'mercator4v5.0: nitrite reductase & swissprot: Ferredoxin--nitrite reductase, chloroplastic & original description: Nitrite reductase (AHRD V1 ***- Q76KB0_TOBAC); contains Interpro domain(s) IPR006067 Nitrite and sulphite reductase 4Fe-4S region'	Cp	2	Cp	possibly M	Cp	Cp	99.9	plastid stroma	plastid	plp_at_00178; plp_at_02512	Cp	0.98	0	No	Detected by both ITAG and Atlas
Solyc01g108660	Probable N-acetyl-gamma-glutamyl-phosphate reductase (AHRD V1 ***- A7WPL0_TOBAC); contains Interpro domain(s) IPR000706 N-acetyl-gamma-glutamyl-phosphate reductase	-	At2g19940	NP_001306256.1	MASLAALNSNLFNGGCLWKYQDELKVSKAGKLRIRVTSMASSSPAQSLQFADGKANKLDKLRVGVLGASGYTGSEIIRLLRNHPYFQITLMTADRKAGQSIESVFPHLVTQDLPNLVAVKDADFSAVDAVFCCLPHGTTQEIIKSLPTNLKVVDLSADFRLQDIAEYEEWYGQPHKATALQKEAVYGLTEISRREIQSARLVANPGCYPTSVQLPLIPLIKSNFIEVRNIIIDSKSGVSGAGRGAKEANLYTEIAEGIHSYGITRHRHVPEIEQGLSEAANSKVTVSFTPHLMPMSRGMQSTIYVEMAPGMTTQDLKDHLGNYYEHEEFVVLLKNKEVPHTRHVRGSNYCLMNVFPDRIPGRAIIISVIDNLVKGASGQALQNLNLMMGIPENLGLGCL…	9	66	9	5.661	0.0365051	290	5	3	8	'4.1.1.1.3'	'Amino acid metabolism.glutamate group amino acid biosynthesis.glutamate-derived amino acids.ornithine.N-acetylglutamate-5-phosphate reductase'	'mercator4v5.0: N-acetylglutamate-5-phosphate reductase & swissprot: Probable N-acetyl-gamma-glutamyl-phosphate reductase, chloroplastic & original description: N-acetyl-gamma-glutamyl-phosphate reductase (AHRD V1 ***- A7WPL0_TOBAC); contains Interpro domain(s) IPR000706 N-acetyl-gamma-glutamyl-phosphate reductase'	M	5	-	Cp	Cp	M	80.7	plastid stroma	plastid	-	Cp	0.71	0.03	No	Detected by both ITAG and Atlas
Solyc01g108910	CCG-binding protein 1	CBP1	At2g15890	XP_004230833.1	MMLQSMALNSLSSTSLVGVNNELHSSRFQVNSSTIRCCSRSHAYIPKLEPFSRTKFDRVFKDPPLIEKSENELADYCSVLEGDDSYSCWQAYFELKDLEKEAPKEEVERLILQAGGVKTLIGCLHGVSDMHKAKKESKESAKPVNLDAQRAGGLCPIPDGLPKSREELEEEEKARMPDSPYTKLLRAKGTHPVWY	6	27	6	7.111	0.0458554	231	5	3	8	'15.2.4'	'RNA biosynthesis.RNA polymerase I-dependent transcription.regulatory protein *(CBP) of CCG/MEE12 activity'	'mercator4v5.0: regulatory protein *(CBP) of CCG/MEE12 activity & swissprot: CCG-binding protein 1 & original description: COSII_At2g15890 (Fragment) (AHRD V1 *-*- C0KFD9_9SOLN)'	Cp	2	Cp	Cp	Cp	Cp	65.3	-	plastid	-	Cp	0.5	0.05	No	Detected by both ITAG and Atlas
Solyc01g109300	4-hydroxy-3-methylbut-2-enyl diphosphate reductase (AHRD V1 ***- A2TGW4_9LAMI); contains Interpro domain(s) IPR003451 LytB protein	HDR	At4g34350	NP_001234728.1 Pulido et al 2012	MAIPLQFSSISTRTDLSLPETRTFRLPKPFSVIRCSAGEPVPSSSATAESEFDAKVFRKNLTRSANYNRKGFGHKEATLELMNREYTSDIIKKLKENEFEYTWGNVTVKLAESYGFCWGVERAVQIAYEARKQFPTERIWITNEIIHNPTVNKRLEDMDVKNIPLEEGKKNFDVVDKDDVVVLPAFGAAVDEMLVLSDKNVQIVDTTCPWVTKVWNTVEKHKKGEYTSIIHGKYAHEETVATASFAGKYIIVKNMAEATYVCDYILGGKLDGSSSTKEAFMQKFKYAVSEGFDPDVDLVKAGIANQTTMLKGETEDIGKLVERTMMQKYGVENVNNHFVSFNTICDATQERQDAMYKLVEQKLDLMLVIGGWNSSNTSHLQEIAEERGIPSYWIDSEQR…	16	89	16	4.843	0.0312302	332	5	3	8	'9.1.2.8'	'Secondary metabolism.terpenoids.methylerythritol phosphate (MEP) pathway.4-hydroxy-3-methylbut-2-enyl diphosphate reductase'	'mercator4v5.0: 4-hydroxy-3-methylbut-2-enyl diphosphate reductase & swissprot: 4-hydroxy-3-methylbut-2-enyl diphosphate reductase, chloroplastic & original description: 4-hydroxy-3-methylbut-2-enyl diphosphate reductase (AHRD V1 ***- A2TGW4_9LAMI); contains Interpro domain(s) IPR003451 LytB protein'	Cp	2	Cp	Cp	Cp	Cp	95.1	plastid stroma	plastid	-	Cp	0.92	0	No	Detected by both ITAG and Atlas
Solyc01g109790	Glucose-1-phosphate adenylyltransferase large subunit, (AHRD V1 **** Q15I66_SOLLC); contains Interpro domain(s) IPR011831 Glucose-1-phosphate adenylyltransferase IPR005836 ADP-glucose pyrophosphorylase, conserved site	APL3	At4g39210	NP_001233918.2	MDTCCAAMKSTVHLGRVSTGGFNNGEKEIFGEKIRGSLNNNLRINQLSKSLKLEKKIKPGVAYSVITTENDTETVFVDMPRLERRRANPKDVAAVILGGGEGTKLFPLTSRTATPAVPVGGCYRLIDIPMSNCINSAINKIFVLTQYNSAALNRHIARTYFGNGVSFGDGFVEVLAATQTPGEAGKKWFQGTADAVRKFIWVFEDAKNKNIENILVLSGDHLYRMDYMELVQNHIDRNADITLSCAPAEDSRASDFGLVKIDSRGRVVQFAEKPKGFELKAMQVDTTLVGLSPQDAKKSPYIASMGVYVFKTDVLLKLLKWSYPTSNDFGSEIIPAAIDDYNVQAYIFKDYWEDIGTIKSFYNASLALTQEFPEFQFYDPKTPFYTSPRFLPPTKIDNC…	6	13	5	0.562	0.00362407	965	4	0	4	'3.2.2.3.1'	'Carbohydrate metabolism.starch metabolism.biosynthesis.ADP-glucose pyrophosphorylase complex.large subunit *(APL)'	'mercator4v5.0: large subunit of ADP-glucose pyrophosphorylase & swissprot: Glucose-1-phosphate adenylyltransferase large subunit 1 (Fragment) & original description: Glucose-1-phosphate adenylyltransferase (AHRD V1 **** Q15I66_SOLLC); contains Interpro domain(s) IPR011831 Glucose-1-phosphate adenylyltransferase IPR005836 ADP-glucose pyrophosphorylase, conserved site'	-	3	-	none	Cp	Cp	100	plastid stroma	plastid	-	-	0.02	0	No	Detected by both ITAG and Atlas
Solyc01g109850	Diaminopimelate decarboxylase (AHRD V1 **** D2DKE7_SOYBN); contains Interpro domain(s) IPR002986 Diaminopimelate decarboxylase	DAPDC1	At3g14390	XP_004230896.1	MAATHLVSHSPSLHKSLKYPSNASQKLSFFKPNFPLKPISRNLSIRASVSTSEPQTQKFQHCFKKCEDGFLYCEGVKVEDVMETVERRPFYLYSKPQITRNVEAYKAALEGLDSIIGYAIKANNNLKILEHLRSLGCGAVLVSGNELKLALGAGFDPTKCIFNGNGKLLEDLVLAAQAGVFVNIDSEFDLDNIVAAARLAGKKVNVLLRINPDVDPQVHPYVATGNKSSKFGIRNEKLQWFLDAVKAHPQELKLVGAHCHLGSTITKVDIFRDAAALMVNYIDEIRSQGFEIDYLNIGGGLGIDYYHAGAILPSPRDLINTVRELVLSRNLNLIIEPGRSLIANTCCLVNRVTGVKTNGTKNFIVIDGSMAELIRPSLYDAYQHIELVSPPPPEAAIAK…	16	143	16	9	0.0580367	165	5	3	8	'4.2.2.3.5'	'Amino acid metabolism.aspartate group amino acid biosynthesis.aspartate-derived amino acids.lysine.diaminopimelate decarboxylase'	'mercator4v5.0: diaminopimelate decarboxylase & swissprot: Diaminopimelate decarboxylase 1, chloroplastic & original description: Diaminopimelate decarboxylase (AHRD V1 **** D2DKE7_SOYBN); contains Interpro domain(s) IPR002986 Diaminopimelate decarboxylase'	Cp	1	Cp	Cp	Cp	Cp	92.5	plastid	plastid	-	Cp	1	0	No	Detected by both ITAG and Atlas
Solyc01g109930	Inositol monophosphatase family protein (AHRD V1 **** D7MGB6_ARALY); contains Interpro domain(s) IPR011809 Histidinol-phosphate phosphatase, putative, inositol monophosphatase	IMPL2	At4g39120	XP_004230915.1	MQMLSQSHFLSLYPRNSSPLSSSFSAFSGGCNTRKIVSGSLAFQHSGIHSFPISHGIKLASPVMTSNCVLPSNQAQIVDFGVEDSELGKFAAVGNKIADAAGEVIRKYFRKSFDILDKEDLSPVTIADQAAEESMVKIIQENFPSHAIYGEEKGWRCQEETAEYVWVLDPIDGTKSFITGKPVFGTLIALLYKGKPILGVIDQPVLRERWIGLSGRRTTLNGQEISTRNCSSLSKAYMYTTSPHLFEGDAEIAFARVRSKVKVPLYGCDCYAYALLASGFVDLVVESGLKPYDFLSLVPVIEGAGGTITDWKGQHFNWKASAGSPATSFNVVAAGDKEVHQEALDALQWR	5	21	5	2.162	0.0139417	564	5	3	8	'4.1.2.8'	'Amino acid metabolism.glutamate group amino acid biosynthesis.histidine.histidinol-phosphate phosphatase'	'mercator4v5.0: histidinol-phosphate phosphatase & swissprot: Bifunctional phosphatase IMPL2, chloroplastic & original description: Inositol monophosphatase family protein (AHRD V1 **** D7MGB6_ARALY); contains Interpro domain(s) IPR011809 Histidinol-phosphate phosphatase, putative, inositol monophosphatase'	Cp	2	Cp	Cp	Cp	C	58.5	plastid	plastid	-	Cp	0.8	0.14	No	Detected by both ITAG and Atlas
Solyc01g110160	Uncharacterized protein similar to BFA3	BFA3	At2g21385	XP_004230904.1	MATILSLNPLAIRRFSSNSQCYLHRTMRIGQAAIHFQKNYPVSFVGFLQFSKRRNFICAVSKDAEESFKKTVEVDRLIDTLREASDKELPQIVVENVLAFNESFWIRLAARADTCKSDDDKKDYEELALTVMNIVDRLVHKTNEKIEASTDVLKAILKPVIDEVEEISWPLRDPEAVSLMEKEINQREQEGQLDEGFLAEVNAQLRQATKDGDKPGLEAMLQKVLQLYASRVLSKRSYAKKGNEVLKAEQFLETIIKAPEEVWNKLLLDGMTLGKGDISPEELYAVIKKRMERTLIRTEGGSYQQRVLIEYLKGIESRAGEIVRVLQG	13	51	13	5.449	0.035138	299	5	3	8	'1.1.9.3.3'	'Photosynthesis.photophosphorylation.ATP synthase complex.assembly.assembly factor *(BFA3)'	'mercator4v5.0: ATP synthase complex assembly factor *(BFA3) & original description: Chromosome 11 contig 1 DNA sequence (AHRD V1 ***- Q00YQ5_OSTTA)'	M	4	Cp	M	Cp	M	79.7	plastid stroma; mitochondria	plastid	plp_at_01373	Cp	0.87	0.01	No	Detected by both ITAG and Atlas
Solyc01g110360	Fructose-bisphosphate aldolase (AHRD V1 ***- B0FPD8_SOLTU); contains Interpro domain(s) IPR000741 Fructose-bisphosphate aldolase, class-I	FBA1	At4g38970	NP_001333903.1 Cai et al (2016)	MASASLLKSSPVLDKSEFLKGQSLRQPSVSVVRCHPTNATSLTVRAASSYADELIKTAKTVASPGRGILAMDESNATCGKRLASIGLENTEANRQAYRTLLVSAPGLGQYISGAILFEETLYQSTVDGRKIVDVLIEQNIVPGIKVDKGLVPLAGSNDESWCQGLDGLASRSAAYYQQGARFAKWRTVVSIPNGPSALAVKEAAWGLARYAAISQDNGLVPIVEPEILLDGEHGIDRTFEVAQKVWAEVFFYLAENNVMFEGILLKPSMVTPGAECKDRATPQQVADYTLSLLKRRIPPAVPGIMFLSGGQSEVEATLNLNAMNQAPNPWHVSFSYARALQNTCLKTWGGQPENVKAAQDTLLVRAKANSLAQLGKYTGEGESDEAKQGMFVKGYVY	20	296	9	18.953	0.122219	85	5	3	8	'1.2.5'	'Photosynthesis.calvin cycle.fructose 1,6-bisphosphate aldolase'	'mercator4v5.0: fructose 1,6-bisphosphate aldolase & swissprot: Fructose-bisphosphate aldolase 2, chloroplastic & original description: Fructose-bisphosphate aldolase (AHRD V1 ***- B0FPD8_SOLTU); contains Interpro domain(s) IPR000741 Fructose-bisphosphate aldolase, class-I'	Cp	2	Cp	Cp	Cp	Cp	75.5	plastoglobules; plastid stroma	plastid	plp_at_00474; plp_at_01110; plp_at_02380	Cp	1	0	No	Detected by both ITAG and Atlas
Solyc01g110520	Amidophosphoribosyltransferase, chloroplastic	ASE2	At4g34740	XP_004230902.1	MAAAVSTAVTNKSHLSSALDKPFTTPSQKLLSLAVKTLPKPYHHHHRTLITAASKNPLTDVVSSKPIPDGRSFDSYFHDDDDKPREECGVVGIYGDSEASRLCYLALHALQHRGQEGAGIVCVNDNVLKSITGVGLVSDVFSESKLDQLPGDLAIGHVRYSTAGSSMLKNVQPFVASYRFGSVGVAHNGNLVNYKQLRGELEENGSIFNTSSDTEVVLHLIAISKARPFLLRIVEACEKIEGAYSMVFATEDKLVAVRDPYGFRPLVMGRRSNGAVVFASETCALDLIEATYEREVLPGEVVVVDKEGVQSICLMPHPEPKSCIFEHIYFALPNSVVFGRSVYESRRAFGEILATEAPVECDVVIAVPDSGVVAALGYAAKAGVPFQQGLIRSHYVGRT…	11	35	10	1.154	0.00744159	764	5	3	8	'6.1.1.1'	'Nucleotide metabolism.purines.ribonucleotide (RN) anabolism.phosphoribosyldiphosphate 5-amidotransferase *(ASE)'	'mercator4v5.0: phosphoribosyldiphosphate 5-amidotransferase *(ASE) & swissprot: Amidophosphoribosyltransferase 2, chloroplastic & original description: Glucosamine--fructose-6-phosphate aminotransferase (AHRD V1 *-*- GLMS_METKA); contains Interpro domain(s) IPR005854 Amidophosphoribosyl transferase'	Cp	2	Cp	Cp	Cp	Cp	99.9	plastid	plastid	-	Cp	1	0	No	Detected by both ITAG and Atlas
Solyc01g110550	Ribosome-binding factor A (AHRD V1 **** B6TDG2_MAIZE); contains Interpro domain(s) IPR000238 Ribosome-binding factor A	RBF1	At4g34730	XP_004230968.1	MQNLVIQIPRLRPLPPSTQCLLPATMSLSPAKHINLRQFDSRELKTNSRSVNRRFIRCMANPRRVKMVAKQIRRELSDMLLTDKVLQYAVLPEAALGADRYLSSLTTISDVEVSTDLQVVKVYVSVFGDERGKEVALTGLKSKAKYVRSELGRRMKLRLTPEIRFIEDESLERGSRVLAILDRIKDENENKDSPNDGSSESDYDGDWEGDDPDDEGIIYVK	5	16	5	2.981	0.019223	462	5	3	8	'17.6.2.1.7'	'Protein biosynthesis.organelle machinery.plastidial ribosome biogenesis.rRNA maturation.16S-rRNA maturation factor *(RBF1)'	'mercator4v5.0: 16S-rRNA maturation factor *(RBF1) & swissprot: Probable ribosome-binding factor A, chloroplastic & original description: Ribosome-binding factor A (AHRD V1 **** B6TDG2_MAIZE); contains Interpro domain(s) IPR000238 Ribosome-binding factor A'	Cp	4	Cp	none	Cp	Cp	64.7	plastid stroma	plastid	-	Cp	0.75	0	No	Detected by both ITAG and Atlas
Solyc01g111020	Maturation of RBCL 1; Pentatricopeptide repeat-containing protein (AHRD V1 *-*- D7L4E9_ARALY); contains Interpro domain(s) IPR002885 Pentatricopeptide repeat	MRL1	At4g34830	XP_004231448.1	MDSIFSPKLSLLSCSPISSSLVPRRQFLSGSTHSLRPPGLHSRRRCRNIGFQFGGNTSRFVLRASLDSQTVVFASVVTISALTVVFLEFSKRNTNANAKFKEISAELTLALRRQIRHVMNWFPRHVFALINIQEEKSVKTQMKEVTKVSNEREDGEADVLQHDGTYLIQTFVTNNIESLDTNQLAPSSNGSLTLGASVPNEHTESDAVPSSFVADSNNIYLQENIQTTKMSNILTTEEENLRTTKMSNILTTEEVREPEPIAHTESDAVPSSFMEESKNINLQEHLHETKMSNILTTEEVSSERSVALFPTINIDNRTEKTKIMDQELMMKDELKKAHRFVAEDEVIIHNLIFRDSTREDLYSFFGASSKSLNGQDALTSHASRQGIGTFSPPSKAFSV…	11	24	11	0.573	0.003695	961	5	2	7	'1.2.1.3.5'	'Photosynthesis.calvin cycle.ribulose-1,5-bisphosphat carboxylase/oxygenase (RuBisCo) activity.RuBisCo regulation.rbcL-mRNA stability factor *(MRL1)'	'mercator4v5.0: rbcL-mRNA stability factor *(MRL1) & swissprot: Pentatricopeptide repeat-containing protein MRL1, chloroplastic & original description: Pentatricopeptide repeat-containing protein (AHRD V1 *-*- D7L4E9_ARALY); contains Interpro domain(s) IPR002885 Pentatricopeptide repeat'	Cp	2	Cp	Cp	Cp	C	73	plastid	plastid	-	Cp	0.46	0.44	No	Atlas only
Solyc01g111120	Triosephosphate isomerase (AHRD V1 **** D6N3G7_GOSHI); contains Interpro domain(s) IPR000652 Triosephosphate isomerase	pdTPI-2A	At2g21170	XP_004230885.1	MAVASTSLASQMSGPKSVTSISCPQFSGLRKSLSKLDNSVSFSTSQAFFQNVDSHLRISSDRKGCRAVVAMAGSGKFFVGGNWKCNGTKDSISKLVSDLNSAQLESDVDVVVAPPFLYIDQVKNSLTDRIEVSAQNCWTGKGGAFTGEISVEQVKDLGCKWVILGHSERRHVIGENDEFIGKKAAYALSQGVGVIACIGELLEEREAGKTFDVCFQQLKAFADAIPSWDNVVIAYEPVWAIGTGKVASPEQAQEVHVAVRDWLTKNVSAEVASKTRIIYGGSVNGSNSSDLAKKEDIDGFLVGGASLKGPEFATIVNSVTAKKVAA	11	262	4	20.544	0.132478	75	5	3	8	'1.2.4'	'Photosynthesis.calvin cycle.triosephosphate isomerase'	'mercator4v5.0: triosephosphate isomerase & swissprot: Triosephosphate isomerase, chloroplastic & original description: Triosephosphate isomerase (AHRD V1 **** D6N3G7_GOSHI); contains Interpro domain(s) IPR000652 Triosephosphate isomerase'	Cp	1	Cp	Cp	Cp	Cp	99.9	plastid stroma	plastid	plp_at_00182; plp_at_01370; plp_at_02365	Cp	1	0	No	ITAG only
Solyc01g111470.2.1	Pentatricopeptide repeat-containing protein (AHRD V1 ***- D7L879_ARALY); contains Interpro domain(s) IPR002885 Pentatricopeptide repeat	-	At2g16880	XP_010315377.1	MSSSYPPLKPSQLVQTITTLLSSSPKSLPKCSLQSYLPHLTPPIIHSILSSPPLSSRPSTLFSFFQWSQSHIPSFSTHPLPFPSLLPILSSLLSHRRFTVARSLLLTFIPSNADHPQHLLHRHLLHPISNFPQPSTELLDTAIGAYCQCGKPHLALQIFKKMKRLRLCPNIITFNTLITALVRYPSTHSLFLCNELFNDALKLGLVPTTITINILIKVYCLAYKYKDANQLLDRMSEFGCVPDNVSYNTILDGLCEKGRLNEVRDLLLDMKGKGLVPNRNTYNILIHGYCKIGWLKDAAQIVELMTQNNTLPDVWTYNMLIGGLCNEGRIDDAIRIRDEMVGLKLLPDVKTYNTLINGCLDNKRSSEAFDLLEEMNQKGIKCNEITYNTLIKGYCKEGK…	1	1	1			1254	0	1	1	35.1.5	not assigned.no ontology.pentatricopeptide (PPR) repeat-containing protein	'mercator4v5.0: not classified & original description: none'	Cp	4	Cp	possibly Cp	Cp	Cp	0.8949	-	-	-	-	0.35	0.04	No	Detected by both ITAG and Atlas
Solyc01g111750	Chaperone-like protein of POR1; Heat shock protein DnaJ domain protein (AHRD V1 *--- B7K9K5_CYAP7)	CPP1	At5g23040	XP_010315389.1 Lee et al (2013)	MATSLSVRPNRTIISSDPAGSTRPNPIRRPPISAHLPKIPNSDSFRRRRLVFTSHRRKLNPAVQAGSRADDSAPFEMSVENALKLLGVTEGASFDDILRAKKSIISSCKDDPDTIAQVEAAYDMLLMQSLSQRRSGKVVDSSVRFADVKAANASGMGSMPKWLQTTVKSSPVAVEAPASKELGVQAGVYGALMVLTYVNGASTPLGVSYGADVPGLILATSFGATLYFMTKKNVKLGKASVITIGGLVAGAVVGSAVENWLQVDIVPLLGIHTPATVKGTLIITGLDSCSEVQLLATLQINAFRV	1	2	1	0.194	0.00125101	1126	2	0	2	'35.2'	'not assigned.not annotated'	'mercator4v5.0: not classified & original description: Heat shock protein DnaJ domain protein (AHRD V1 *--- B7K9K5_CYAP7)'	Cp	1	Cp	Cp	Cp	Cp	93.1	mitochondria; envelope	plastid	plp_at_01569	Cp	0.73	0.01	No	Detected by both ITAG and Atlas
Solyc01g111760	V-type ATP synthase beta chain IPR005723 ATPase, V1 complex, subunit B	-	At4g38510	XP_004231058.1	MEEGTLEVGMEYRTVSGVAGPLVILDKVKGPKYQEIVNIRLGDGTTRRGQVLEVDGEKAVVQVFEGTSGIDNKYTTVQFTGEVLKTPVSLDMLGRIFNGSGKPIDNGPPILPEAYRDISGSSINPSERTYPEEMIQTGISTVDVMNSIARGQKIPLFSAAGLPHNEIAAQICRQAGLVKRLEKSDNLLEGGEEDNFAIVFAAMGVNMETAQFFKRDFEENGSMERVTLFLNLANDPTIERIITPRIALTTAEYLAYECGKHVLVILTDMSSYADALREVSAAREEVPGRRGYPGYMYTDLATIYERAGRIEGRTGSITQIPILTMPNDDITHPTPDLTGYITEGQIYIDRQLHNRQIYPPINVLPSLSRLMKSAIGEGMTRRDHSDVSNQLYANYAIGK…	11	36	1	2.162	0.0139417	565	5	0	5	'24.1.1.2.2'	'Solute transport.primary active transport.V-type ATPase complex.peripheral V1 subcomplex.subunit B'	'mercator4v5.0: subunit B of V-type ATPase peripheral V1 subcomplex & swissprot: V-type proton ATPase subunit B 2 & original description: V-type ATP synthase beta chain (AHRD V1 ***- VATB_PYRHO); contains Interpro domain(s) IPR005723 ATPase, V1 complex, subunit B'	-	2	-	none	not Cp	C	97.38	-	vacuole	plp_at_01109; plp_at_01530	-	0	0	No	Detected by both ITAG and Atlas
Solyc01g111990	Alanyl-tRNA synthetase (AHRD V1 **** Q9FFC7_ARATH); contains Interpro domain(s) IPR002318 Alanyl-tRNA synthetase, class IIc	AlaRS	At5g22800	XP_004231078.1	MTSLNFPKTGHGRDSILLFPTSCFQSKPFLPSSKGYRYSSGLIVRTQTLIYASSLSNGRTKIKGPREIQFVAKAQPVAVELVEGKLRDPQTSGDAIRQRFLDFYAARGHKVLPSASLVPDDPTVLLTIAGMLQFKPIFLGKVPREVPSAATSQKCIRTNDIENVGRTSRHQTFFEMLGNFSFGDYFKKEAIKWAWELSTSEYGLPADRLWISVYEDDDETFALWHDELGIPKERIKRLGEDDNFWTSGVTGPCGPCSELYYDFHPERGTSDVDLGDDTRFIEFYNLVFMQYNKKDDGSLEPLKQKNIDTGLGLERMARILQKVPNNYETDLIFPILEKAAELANVSYALAGDSTKTKLKIIGDHMRAVVYLISDGVNPSNIGRGYVVRRLIRRVVRTGR…	37	159	37	7.778	0.0501566	209	5	3	8	'17.2.1'	'Protein biosynthesis.aminoacyl-tRNA synthetase activities.alanine-tRNA ligase'	'mercator4v5.0: alanine-tRNA ligase & swissprot: Alanine--tRNA ligase, chloroplastic/mitochondrial & original description: Alanyl-tRNA synthetase (AHRD V1 **** Q9FFC7_ARATH); contains Interpro domain(s) IPR002318 Alanyl-tRNA synthetase, class IIc'	-	5	Cp	possibly Cp	Cp	C	99.1	plastid stroma; mitochondria	plastid	-	Cp	0.78	0	No	Detected by both ITAG and Atlas
Solyc01g112060	Uncharacterized protein ycf39 (NCBI); similar to AtHCF244; NmrA family protein (AHRD V1 **-- B2J8Q2_NOSP7); contains Interpro domain(s) IPR016040 D(P)-binding domain	YCF39 HCF244	At4g35250	XP_004231083.1	MASTLYGHLATPTLPSRKLSSLSCPTMFHSALSFSIATTKAKHGSAPKVVCNAQSAPAALNLAPGTPVRPTSILVVGATGTLGRQVVRRALDEGYDVRCLVRPRPAPADFLRDWGATVVNADLSKPETIPATLVGVHTVIDCATGRPEEPIKTVDWEGKVALIQCAKAMGIQKFIFFSIHNCDKHPEVPLMEIKHCTEKFLRDSGLNHVVIRLCGFMQGLIGQYAVPILEEKSVWGTDAPTRIAYMDTQDIARLTFIALRNENINGKLLTFAGPRAWTTQEVITLCERLAGQDANVTTVPVSVLRFTRQLTRLFEWTNDVADRLAFSEVLTSDTVFSVPMAETYNLLGVDAKDVSSLEKYLQDYFTNILKKLKDLKAQSKQTDIFF	9	49	9	1.994	0.0128583	608	5	3	8	'1.1.1.3.7.1'	'Photosynthesis.photophosphorylation.photosystem II.assembly.HCF244-OHP assembly factor complex.scaffold component *(HCF244)'	'mercator4v5.0: protein involved in PS-II assembly *(HCF244) & swissprot: Protein HIGH CHLOROPHYLL FLUORESCENCE PHENOTYPE 244, chloroplastic & original description: NmrA family protein (AHRD V1 **-- B2J8Q2_NOSP7); contains Interpro domain(s) IPR016040 NAD(P)-binding domain'	Cp	2	Cp	Cp	Cp	Cp	99.5	thylakoid	plastid	plp_at_00467	Cp	0.98	0.01	No	Detected by both ITAG and Atlas
Solyc01g112290	Glutamyl-tRNA synthetase (AHRD V1 ***- Q52JJ5_NICBE); contains Interpro domain(s) IPR004527 Glutamyl-tRNA synthetase, class Ic, bacterial/mitochondrial	GluRS	At5g64050	XP_004231106.1	MATVAAAPWFRARLIPELKSRQSLLYCRNGPRRYPQSLCFRRRSFSIYASAGDEGAVRVRFAPSPTGNLHVGGARTALFNYLYARSKGGKFVLRIEDTDLERSTRESEEAVLRDLSWLGLAWDEGPGIGGNYGPYRQSERNALYKEFAEKLLQSGHVYRCFCSNEELEKMKEMAKLKQLPPVYTGRWASATEQEVLEELTKGTPYTYRFRVPKEGSLKIDDLIRGEVSWNFDTLGDFVIMRSNGQPVYNFCVTVDDATMAISHVIRAEEHLPNTLRQALIYKALGFPMPHFAHVSLILAPDRSKLSKRHGATSVGQFRDMGYLPQAMVNYLALLGWGDGTENEFFSLEQLVEKFTIERVNKSGAIFDSTKLRWMNGQHLRSLPSEELNQIIGERWKDAD…	13	47	13	3.047	0.0196486	456	5	3	8	'17.2.7'	'Protein biosynthesis.aminoacyl-tRNA synthetase activities.glutamate-tRNA ligase'	'mercator4v5.0: glutamate-tRNA ligase & swissprot: Glutamate--tRNA ligase, chloroplastic/mitochondrial & original description: Glutamyl-tRNA synthetase (AHRD V1 ***- Q52JJ5_NICBE); contains Interpro domain(s) IPR004527 Glutamyl-tRNA synthetase, class Ic, bacterial/mitochondrial'	Cp	5	Cp	Cp	Cp	M	54.1	plastid stroma; mitochondria	mitochondrion,plastid	-	Cp	0.71	0.02	No	Detected by both ITAG and Atlas
Solyc02g005200	PsaB translation factor (Fragment) (AHRD V1 ***- A4S2E4_OSTLU); contains Interpro domain(s) IPR009472 Protein of unknown function DUF1092	TAB2	At3g08010	NP_001316880.1	MACLSCSLPLLQTHKAISNFSVFPFKSVAICLPKCKVKSVHIPSVSEASSISSTNLEEEEDDDPTAELVYLDPEIDPESLSEWELDFCSRPILDIRGKKLWELLVCDDSLSLQYTKYFPNNLINSITLKDALLSISNDLGIPLPDKIRFFRSQMQTIITRACNELAIKPVPSKRCLSLVLWLEDRYETVYTRHPGFQKGAKPLLALDNPFPMELPENLYGEKWAFVQLPVSAVRKEVSNLETRLVFGSSLDLDLLGIEIEDNTLIPGLAVASSRAKPLAAWMNGLEVCSIEADVDKASLILSVGISTRYIYATYKKNPASTSEAEAWEAAKKACGGLHFLAIQNDLNSDDCVGFWLLLNLPPPPV	4	13	4	0.848	0.00546834	853	5	3	8	'35.1'	'not assigned.annotated'	'mercator4v5.0: not classified & swissprot: Protein TAB2 homolog, chloroplastic & original description: PsaB translation factor (Fragment) (AHRD V1 ***- A4S2E4_OSTLU); contains Interpro domain(s) IPR009472 Protein of unknown function DUF1092'	Cp	3	Cp	Cp	Cp	Cp	31.7	stroma	plastid	-	Cp	0.98	0	No	Detected by both ITAG and Atlas
Solyc02g014150	Photosystem II stability/assembly factor Ycf48-like protein (AHRD V1 **-- B0C6T3_ACAM1); contains Interpro domain(s) IPR016705 Photosystem II stability/assembly factor, HCF136	HCF136	At5g23120	XP_004231481.1	MALAHSIFTPLKPLTTTPRPLLPHNFPPRLPLCRSANINRRQLIADTAAAIILPPLLGVGVSLSPLPVAKAEDTPLSEWERVFLPIDPGVVLLDIAFVPDDPNHGFVLGTRQTILETKDGGTTWVPRSIASAEEEDFNYRFNSISFKGKEGWIIGKPAILLHTSDAGENWERIPLSSQLPGDMVYIKATGEQSAEMVTDEGAIYITSNKGYNWKAAIQETVSATLNRTVSSGISGASYYTGTFSTVNRSPDGRYVAVSSRGNFYLTWEPGQAYWQPHNRAVARRIQSMGWRADGGLWLLVRGGGLYLSKGTGLTEDFEEVSVQSRGFGILDVGYRSQDEAWAAGGSGILLKTTNGGKTWIRDKAADNIAANLYSIYQ	12	223	12	12.111	0.078098	132	5	3	8	'1.1.1.3.5'	'Photosynthesis.photophosphorylation.photosystem II.assembly.assembly factor *(HCF136)'	'mercator4v5.0: protein involved in PS-II assembly *(HCF136) & swissprot: Photosystem II stability/assembly factor HCF136, chloroplastic & original description: Photosystem II stability/assembly factor Ycf48-like protein (AHRD V1 **-- B0C6T3_ACAM1); contains Interpro domain(s) IPR016705 Photosystem II stability/assembly factor, HCF136'	Cp	2	Cp	none	Cp	Cp	94.7	thylakoid-peripheral-lumenal-side	plastid	plp_at_00528; plp_at_01260; plp_at_01688; plp_at_01893; plp_at_01954; plp_at_02607	Thylakoid	0.24	0.76	Yes	Detected by both ITAG and Atlas
Solyc02g020940	Glyceraldehyde-3-phosphate dehydrogenase (AHRD V1 **** D7UNZ5_BRARC); contains Interpro domain(s) IPR000173 Glyceraldehyde 3-phosphate dehydrogenase	GAPA-2	At1g12900	XP_004231523.1	MASAALSVANSSVHVSKNKGSFSEFTGLRTSSAVPFGVGWKTNVDLLSLVAYQTSVISGAGKNNNNNSRVVEAKLKVAINGFGRIGRNFLRCWHGRKDSPLDVIAINDSGGVKQASHLLKYDSTLGIFDADVKPVGTDGISVDGKIIKVVSDRNPINLPWKDLGVDLVIEGTGVFVDREGAGKHIQAGAKKVLITAPGKGDIPTYVVGVNADLYSPDESIISNASCTTNCLAPFVKVLDQKFGIIKGTMTTTHSYTGDQRLLDASHRDLRRARAAALNIVPTSTGAAKAVALVLPSLKGKLNGIALRVPTPNVSVVDLVVQVSKKTFAEEVNAAFRESADNELAGILSVCDEPLVSVDFRCSDVSSTVDASLTMVMGDDMVKVIAWYDNEWGYSQRVVD…	21	371	7	49.119	0.316745	36	5	3	8	'1.2.3.1'	'Photosynthesis.calvin cycle.glyceraldehyde 3-phosphate dehydrogenase (GAPDH) activity.glyceraldehyde 3-phosphate dehydrogenase *(GAPDH)'	'mercator4v5.0: glyceraldehyde 3-phosphate dehydrogenase *(GAPDH) & swissprot: Glyceraldehyde-3-phosphate dehydrogenase A, chloroplastic (Fragment) & original description: Glyceraldehyde-3-phosphate dehydrogenase (AHRD V1 **** D7UNZ5_BRARC); contains Interpro domain(s) IPR000173 Glyceraldehyde 3-phosphate dehydrogenase'	Cp	3	Cp	Cp	Cp	Cp	92.5	plastid stroma	plastid	plp_at_00032; plp_at_01020; plp_at_02362	Cp	0.91	0.01	No	Detected by both ITAG and Atlas
Solyc02g021140	Superoxide dismutase (AHRD V1 ***- B9S4J6_RICCO); contains Interpro domain(s) IPR001189 Manganese/iron superoxide dismutase	Fe-SOD3	At5g23310	XP_004231531.1	MSWCCCNRLSTSTSSDLWRQFNIPNVGLRQKKRSVSAYYGLKTPPYKLDALEPYMSQRMVEIHWGEHHRGYVESLNKQIENNDIFYGCTMEQLIKLTYNNGNPLPEFSDAAQVWNHDFFWESMQPGGGDMPKLGFLHQIDKDFGSFTNFKDKFIEAALTLFGSGWIWLVLSREEKRLAIIKTSNAVNPLVWNDIPLIGLDLWEHAYYLDYKNDKAKYVNVFMNHLVSWDAALGRMARAQAFVNLGEPKIPVA	2	10	2	1.512	0.00975016	690	4	0	4	'10.1.1.1'	'Redox homeostasis.reactive oxygen scavenging.superoxide dismutase activities.iron superoxide dismutase *(FSD)'	'mercator4v5.0: iron superoxide dismutase *(FSD) & swissprot: Superoxide dismutase [Fe] 3, chloroplastic & original description: Superoxide dismutase (AHRD V1 ***- B9S4J6_RICCO); contains Interpro domain(s) IPR001189 Manganese/iron superoxide dismutase'	M	5	-	none	Cp	Cp	93.1	plastid	plastid	-	-	0.01	0	No	Detected by both ITAG and Atlas
Solyc02g024050	Ferredoxin--NADP reductase (AHRD V1 ***- B9SB31_RICCO); contains Interpro domain(s) IPR012146 Ferredoxin--NADP reductase	FNRR2	At1g30510	XP_004239725.1	MAHSAISQVSVAVPLQTDSSFRRSTFKATSLTFSDKSCISMPSIDLKATRSRSQYIVCMSVQHASKAKVSVSPLSLENATEPPLNIYKPKEPYTATIVSVERIVGPKAPGETCHIVIDHDGNLPYWEGQSYGVVPPGENPKKPGSPHNVRLYSIASTRYGDSFDGKTASLCVRRAVYYDPETGKEDPSKNGVCSNFLCNAKPGDKVKITGPSGKIMLLPENNPNATHIMIGTGTGVAPFRGYLRRMFMESVPMKFNGLAWLFLGVANTDSLLYDDEFTKYLNDYPGNFRYDRALSREQKNNKGGKMYVQDKIEEYSDEIFKLLDEGAHIYFCGLKGMMPGIQDTLKRVAEERGESWEQKLSQLKKNKQWHVEVY	9	31	9	3.281	0.0211576	432	5	3	8	'50.1.17'	'Enzyme classification.EC_1 oxidoreductases.EC_1.18 oxidoreductase acting on iron-sulfur protein as donor'	'mercator4v5.0: EC_1.18 oxidoreductase acting on iron-sulfur protein as donor & swissprot: Ferredoxin--NADP reductase, root-type isozyme, chloroplastic & original description: Ferredoxin--NADP reductase (AHRD V1 ***- B9SB31_RICCO); contains Interpro domain(s) IPR012146 Ferredoxin--NADP reductase'	Cp	1	Cp	Cp	Cp	Cp	100	plastid	plastid	-	Cp	0.97	0.03	No	Detected by both ITAG and Atlas
Solyc02g032860	Phosphoadenosine phosphosulfate reductase (AHRD V1 *-** A6EX37_9ALTE); contains Interpro domain(s) IPR004508 Thioredoxin-independent 5'-adenylylsulphate reductase	APR3	At1g62180	XP_004231612.1	MALAFTSSTAIHGSISSSSHQHPKVGNIQLLDQPKKSLNFTQRRCAVKPLYAEPKRNESIVPSAATFVAPEVAEKLIEAEDFEKLAKDLENASPLEIMDNALEKFGDDIAIAFSGAEDVALIEYAHLTGRPFRVFSLDTGRLNPETYQLFDAVEKHYGIRIEYMFPDAVEVQALVRTKGLFSFYEDGHQECCRVRKVRPLRRALKGLRAWITGQRKDQSPGTRSEVPVVQVDPSFEGLDGGSGSLVKWNPVANVEGKDIWNFLRAMNVPVNSLHLKGYVSIGCEPCTRPVLPGQHEREGRWWWEDAKAKECGLHKGNIKAESVNGNGNNATQTNDTVADIFDTKGIVTLSRPGVENLLKLEDGREPWLVVLYAPWCQFCQAMEGSYVELAEKLGGSGVK…	1	2	1	0.11	0.000709337	1197	1	0	1	'25.2.2.1'	'Nutrient uptake.sulfur assimilation.sulfate assimilation.(phospho)adenosine phosphosulfate reductase *(APR)'	'mercator4v5.0: (phospho)adenosine phosphosulfate reductase *(APR) & swissprot: 5'-adenylylsulfate reductase 3, chloroplastic & original description: Phosphoadenosine phosphosulfate reductase (AHRD V1 *-** A6EX37_9ALTE); contains Interpro domain(s) IPR004508 Thioredoxin-independent 5'-adenylylsulphate reductase'	Cp	1	Cp	Cp	Cp	Cp	100	plastid stroma	plastid	-	Cp	0.99	0	No	Detected by both ITAG and Atlas
Solyc02g049070	rRNA small subunit methyltransferase J [At5g08540]	-	At5g08540	XP_004231721.1	MAASACTVLNFSHPHVASTSQYIPTLSTPINRTLSFPRHRSNTFVVTVGFSTRAAKSDSGANVSSDKKKEVLEDEEEEEMPWIQEKALDLVEFTGSVTQAIPGPRIGSSSFPWILTVPLTYFGITFVIAFVKTARKFNSPREKRKKLVNKNAELCKSIDELFEKGKDFVEPSTLKGLAQKTGFDMEEIFRKYIRYSLNEKPFSPDLVAYLIQLRKASMLTDSEVAGILNEISRRIVQDKGPVVMDISGYSEKGLKRKLAVQTLFGKIYYLSELPEFCSRDSSLTVKEIFGVADEDAEKLRLHTIPEAGNMDSLERMVNGSDSE	2	4	2	0.334	0.00215381	1048	3	0	3	'35.2'	'not assigned.not annotated'	'mercator4v5.0: not classified & original description: Genomic DNA chromosome 5 P1 clone MAH20 (AHRD V1 **-- Q9FNN4_ARATH)'	Cp	1	Cp	Cp	Cp	Cp	99.3	envelope-inner	plastid	-	Cp	0.99	0	No	Detected by both ITAG and Atlas
Solyc02g055440	Large ribosomal RNA subunit accumulation protein YCED homolog 2, chloroplastic (per NCBI); Genomic DNA chromosome 3 P1 clone MPN9 (AHRD V1 ***- Q9LT28_ARATH) [E3 ubiquitin-protein ligase, putative (DUF177) [Arabidopsis thalianana], e-value 6e-65]	YCED2	At3g19800	XP_004231729.1	MASRGGGWISSRSCINTSIPQRDSSTRISKGNHLSLITKKSKKPLVRISSSDGKWHGEWNSDYIFTLKDLQLEDLAEERDTPISIQLSIHKHAGFGLSVDGTIITSFTTKCSNCYSPYCREVHTSFKVWVLPSTRDNKGCAHQLPLLGWDDPSVIYVKPGFEADLDSLIQDTVRLATSVKETCSESCEKSVPKLQPLGKQNAASIDRRWSRLLELKKET	1	4	1	0.166	0.00107045	1147	4	1	5	'35.1'	'not assigned.annotated'	'mercator4v5.0: not classified & swissprot: Large ribosomal RNA subunit accumulation protein YCED homolog 2, chloroplastic & original description: Genomic DNA chromosome 3 P1 clone MPN9 (AHRD V1 ***- Q9LT28_ARATH)'	Cp	4	-	Cp	Cp	Cp	56.5	-	-	-	-	0.11	0.02	No	Detected by both ITAG and Atlas
Solyc02g062130	ferredoxin- NADP reductase (AHRD V1 ***- D7MN04_ARALY); contains Interpro domain(s) IPR012146 ferredoxin--NADP reductase	PETH2 LFNR	At1g20020	XP_004233557.1	MAAALSASVSLQSSNSTSLSIKTIFISPENITFNKVLLCNRNVSVSRKVFHIRAQLTTEIPAKVAKVSKKQDEGVVVNKFRPKDPYIGRCLLNTKITGDDAPGETWHMVFSTEGEIPYREGQSIGVIPDGVDSNGKPHKLRLYSIASSALGDFGDSKTVSLCVKRLVYTNDKGEIVKGVCSNFLCDLKPGAEVKITGPVGKEMLMPKDPNATVIMLATGTGIAPFRGFLWKMFFEKHEDYKFNGLAWLFLGVPTSSSLLYKEEFEKMKEKAPENFRLDFAVSREQINEKGEKMYIQTRMAEYAEELWTLLKKDSTFVYMCGLKGMEQGIDDIMTSLAERDGINWANYKKQLKKAEQWNVEVY	12	217	3	7.185	0.0463326	229	2	3	5	'1.1.5.2.1'	'Photosynthesis.photophosphorylation.linear electron flow.ferredoxin-NADP reductase (FNR) activity.ferredoxin-NADP oxidoreductase'	'mercator4v5.0: ferredoxin-NADP oxidoreductase & swissprot: Ferredoxin--NADP reductase, leaf-type isozyme, chloroplastic & original description: Ferredoxin--NADP reductase (AHRD V1 ***- D7MN04_ARALY); contains Interpro domain(s) IPR012146 Ferredoxin--NADP reductase'	Cp	1	Cp	Cp	Cp	Cp	100	thylakoid-peripheral-stromal-side	plastid	plp_at_00052; plp_at_01150; plp_at_01713; plp_at_02392	Cp	1	0	No	ITAG only
Solyc02g062340	Fructose-bisphosphate aldolase (AHRD V1 ***- Q9SXX4_NICPA); contains Interpro domain(s) IPR000741 Fructose-bisphosphate aldolase, class-I	FBA2	At4g38970	NP_001333905.1 Cai et al (2016)	MASASLLKTSPVINKTDFIKGQALRQPSVSVNVVRSHPSGLTVRASSYADELVKTAKTVASPGRGILAMDESNATCGKRLDSIGLENTEANRQAYRTLLVSAPGLGNYISGAILFEETLYQSTVDGKKIVDVLLEQNIVPGIKVDKGLVPLAGSNNESWCQGLDGLASRSAAYYQQGARFAKWRTVVSIPNGPSALAVKEAAWGLARYAAISQDNGLVPIVEPEILLDGEHNIDRTFEVAQQVWAEVFFYLAENNVMFEGILLKPSMVTPGAECKERATPEQVADYTLKLLQRRIPPAVPGIMFLSGGQSEVEATLNLNAMNQSPNPWHVSFSYARALQNTCLKTWGGRPENVEAAQKALLTRASANSLAQLGKYTGEGESEEAKEGMFVKGYVY	15	356	6	17.957	0.115796	96	5	3	8	'1.2.5'	'Photosynthesis.calvin cycle.fructose 1,6-bisphosphate aldolase'	'mercator4v5.0: fructose 1,6-bisphosphate aldolase & swissprot: Fructose-bisphosphate aldolase 2, chloroplastic & original description: Fructose-bisphosphate aldolase (AHRD V1 ***- Q9SXX4_NICPA); contains Interpro domain(s) IPR000741 Fructose-bisphosphate aldolase, class-I'	Cp	2	Cp	Cp	Cp	Cp	94.1	plastoglobules; plastid stroma	plastid	plp_at_00474; plp_at_01110; plp_at_02380	Cp	0.99	0	No	Detected by both ITAG and Atlas
Solyc02g062610	Hydrolase alpha/beta fold family protein (AHRD V1 ***- D7MBG9_ARALY); contains Interpro domain(s) IPR000073 Alpha/beta hydrolase fold-1	-	At4g36530	XP_004233528.1	MSTSCATVGTEWLNPVGTRLALPGRNNHFRGKCELSRRGFTFNGIVAAGASVMTTSVVAEPSKGLERLPFKPEGYNYWTWRGHKIHYVVEGEGFPVVLIHGFGASAFHWRYNIPELAKKYKVYALDLIGFGWSEKALIDYDAFIWKDQVVDFLKEIVKEPSVLVGNSLGGFTALIAAASLTDEVKGVTLLNSAGQFGDASSAAEGTEETALQKFILKPLKEIFQRVVLGLVFWQSKQPARIESVLKSVYINSSNVDDYLIDSITRPAADPNAGEVYYRLMTRFISNQRKYTLNSVLRQLSCPLLLLWGDLDPWVGPAKANQIKEFYPNTTIVNLKAGHCPHDEVPELVNEALLDWLSATITPASSLETVSET	3	4	2	0.778	0.00501695	867	2	3	5	'35.1'	'not assigned.annotated'	'mercator4v5.0: not classified & swissprot: Pheophytinase, chloroplastic & original description: Hydrolase alpha/beta fold family protein (AHRD V1 ***- D7MBG9_ARALY); contains Interpro domain(s) IPR000073 Alpha/beta hydrolase fold-1'	Cp	4	Cp	none	Cp	M	96.5	plastid	plastid	-	Cp	0.82	0.17	No	Detected by both ITAG and Atlas
Solyc02g063070	14-3-3 protein beta_alpha-1 IPR000308 14-3-3 protei; General regulatory factor	GRF7	At5g16050	NP_001234007.1	MADSSREENVYLAKLAEQAERYEEMIEFMEKVAKTADVEELTVEERNLLSVAYKNVIGARRASWRIISSIEQKEESRGNEDHVNTIKEYRSKIEAELSKICDGILSLLESNLIPSASTAESKVFYLKMKGDYHRYLAEFKTGTERKEAAENTLLAYKSAQDIALAELAPTHPIRLGLALNFSVFYYEILNSPDRACNLAKQAFDEAISELDTLGEESYKDSTLIMQLLRDNLTLWTSDNADDVGDDIKEASKPESGEGQQ	4	16	1	1.371	0.00884092	721	4	3	7	'27.4.1'	'Multi-process regulation.14-3-3 regulatory system.14-3-3 phosphoprotein-binding protein *(GRF)'	'mercator4v5.0: 14-3-3 phosphoprotein-binding protein *(GRF) & swissprot: 14-3-3 protein 4 & original description: 14-3-3 protein beta/alpha-1 (AHRD V1 **-- 143B1_DANRE); contains Interpro domain(s) IPR000308 14-3-3 protein'	-	2	-	none	Cp	N	73.36	-	cytosol	-	-	0	0	No	Detected by both ITAG and Atlas
Solyc02g063150	Ribulose bisphosphate carboxylase small chain (AHRD V1 ***- Q84QE5_TOBAC); contains Interpro domain(s) IPR000894 Ribulose bisphosphate carboxylase, small chain	RBCS-1	At5g38420	NP_001295872.1	MASSIVSSAAAATRSNVAQASMVAPFTGLKSAASFPVTKKNNNVDITSLASNGGRVRCMQVWPPINMKKYETLSYLPDLSDEQLLSEIEYLLKNGWVPCLEFETERGFVYRENNSSPGYYDGRYWTMWKLPMFGCTDATQVLAEVQEAKKAYPQAWVRIIGFDNVRQVQCISFIAYKPEGF	7	200	2	9	0.0580367	166	5	3	8	'1.2.1.1.2'	'Photosynthesis.calvin cycle.ribulose-1,5-bisphosphat carboxylase/oxygenase (RuBisCo) activity.RuBisCo heterodimer.small subunit'	'mercator4v5.0: small subunit of ribulose-1,5-bisphosphat carboxylase/oxygenase heterodimer & swissprot: Ribulose bisphosphate carboxylase small subunit, chloroplastic 1 & original description: Ribulose bisphosphate carboxylase small chain (AHRD V1 ***- Q84QE5_TOBAC); contains Interpro domain(s) IPR000894 Ribulose bisphosphate carboxylase, small chain'	Cp	2	Cp	Cp	Cp	Cp	100	plastid stroma	plastid	plp_at_01580; plp_at_02356	Cp	0.98	0	No	Detected by both ITAG and Atlas
Solyc02g063300	Unknown Protein (AHRD V1)	-	At5g38060	XP_004233481.1	MFMAMSTQLCPNHVIPYANSSTSHLNRTTISIIDLGKRRLTRLSVQCSEKQTQNLRTCKNCKAQFNPLLNHPRACRYHTAHFGGETRRKFESVYSGGTMDTPDGGKVFQYWHCCGSEDPFDVGCTAAPHASYDD	4	19	4	9	0.0580367	167	5	2	7	'35.2'	'not assigned.not annotated'	'mercator4v5.0: not classified & original description: Unknown Protein (AHRD V1)'	Cp	2	Cp	possibly Cp	Cp	C	50.9	-	-	-	Cp	0.7	0.13	No	Detected by both ITAG and Atlas
Solyc02g064550	Thioredoxin superfamily protein-PRX-domain	-	At5g65840	XP_004233465.1	MESLQQSSLTFATKFPSFCSFSPTPNTFKFLHPFPSSAIPLTATTPKRISSFVPKAAASTAAFAQDIGDVLADVSIFTATGQSVKFEDLWDQNEGVAVVALLRHFGCPCCWELAKALKETKERFDSAGVKLIAVGIGAPNKARILAERLPFPLDCLYADPDRKAYDVLGLYYGVGRTFFNPASAKVLSRFNELREATKNYTIEATPDDRSGVLQQGGMFLFKGKQLLYAWKDEGTGDHAPMEDIFDICCKVPVA	5	20	5	1.424	0.00918269	710	5	3	8	'35.1'	'not assigned.annotated'	'mercator4v5.0: not classified & swissprot: Thioredoxin-like protein AAED1, chloroplastic & original description: C1orf93 homolog (AHRD V1 **-- C1C416_RANCA); contains Interpro domain(s) IPR012335 Thioredoxin fold'	Cp	1	Cp	Cp	Cp	Cp	99.5	plastid stroma	plastid	-	Cp	0.99	0	No	Detected by both ITAG and Atlas
Solyc02g064950	Cystathionine β-synthase (CBS) domain-containing protein-like (AHRD V1 ***- B8AP73_ORYSI); contains Interpro domain(s) IPR000644 Cystathionine beta-synthase, core	CBX1B	At4g36910	XP_004233443.1	MASISPSGVSLHRSSAAFHHQLPCLLLSLPCHKVATFAKCFLSVRLWNSRNHFSVTASNTLTANSVEPRNGVYTVGDFMTRKDDLHVVKPSTSVDEALETLVERRITGFPVVDDDWKLVGLVSDYDLLALDSVSGTGGADANMFPEVGSNWKTFNEVQKLISKTKGKVVGDLMTPAPLVVRESTNLEDAARLLLKTKYRRLPVVDSDGKLVGIITRGNVVRAALHIKRIMEMEGQQ	3	10	1	1.154	0.00744159	765	5	3	8	'10.3.5'	'Redox homeostasis.thiol-based redox regulation.regulatory protein *(LEJ1/2)'	'mercator4v5.0: regulatory protein *(LEJ1/2) of thiol-based redox regulation & swissprot: CBS domain-containing protein CBSX1, chloroplastic & original description: CBS domain-containing protein-like (AHRD V1 ***- B8AP73_ORYSI); contains Interpro domain(s) IPR000644 Cystathionine beta-synthase, core'	Cp	2	Cp	Cp	Cp	M	67.1	plastid stroma	plastid	-	Cp	0.81	0	No	ITAG only
Solyc02g065400	Oxygen-evolving enhancer protein 1 of photosystem II (AHRD V1 ***- A8J0E4_CHLRE); contains Interpro domain(s) IPR002628 Photosystem II manganese-stabilizing protein PsbO	PSBO-1 OEE1-1	At3g50820	NP_001296294.1	MAASLQAAATLMQPTKVGVRNNLQLRSAQSVSKAFGVEQGSGRLTCSLQTEIKELAQKCTDAAKIAGFALATSALVVSGANAEGVPKRLTYDEIQSKTYMEVKGTGTANQCPTIEGGVGSFAFKPGKYTAKKFCLEPTSFTVKAEGVSKNSAPDFQKTKLMTRLTYTLDEIEGPFEVSPDGTVKFEEKDGIDYAAVTVQLPGGERVPFLFTIKQLVASGKPESFSGEFLVPSYRGSSFLDPKGRGGSTGYDNAVALPAGGRGDEEELQKENVKNTASLTGKITLSVTQSKPETGEVIGVFESIQPSDTDLGAKVPKDVKIQGIWYAQLE	15	300	3	15.681	0.101119	107	5	3	8	'1.1.1.2.2.1'	'Photosynthesis.photophosphorylation.photosystem II.PS-II complex.oxygen-evolving center (OEC) extrinsic components.component *(OEC33/PsbO)'	'mercator4v5.0: component *(PsbO/OEC33) of PS-II oxygen-evolving center & swissprot: Oxygen-evolving enhancer protein 1, chloroplastic & original description: Oxygen-evolving enhancer protein 1 of photosystem II (AHRD V1 ***- A8J0E4_CHLRE); contains Interpro domain(s) IPR002628 Photosystem II manganese-stabilizing protein PsbO'	Cp	4	Cp	Cp	Cp	Cp	100	thylakoid-peripheral-lumenal-side	plastid	plp_at_00332; plp_at_01217; plp_at_01657; plp_at_01823; plp_at_01935; plp_at_02427	Thylakoid	0.12	0.88	No but known to be lumenal	Detected by both ITAG and Atlas
Solyc02g066920	Chlororespiratory reduction 7	CRR7	At5g39210	XP_004233386.1	MEAQLWCNKTYNCIGTETWRIQHPLQILHTSNWQQPIFQPFNSSISHSLTCRHIHRNGIKTFATRRRRSNIETDTYVLMEPGKSEEFVTEEELRDKLKSWLENWPAKTLPPDLARFEDSDDAVEYLVKSVCELEIDGDVGSLQWYQVRLQQDII	2	8	2	0.778	0.00501695	868	5	0	5	'1.1.8.1.6.6'	'Photosynthesis.photophosphorylation.chlororespiration.NADH dehydrogenase-like (NDH) complex.assembly and maintenance.assembly factor *(CRR7)'	'mercator4v5.0: assembly factor CRR7 involved in NDH complex assembly & swissprot: Protein CHLORORESPIRATORY REDUCTION 7, chloroplastic & original description: Genomic DNA chromosome 5 TAC clone K3 (AHRD V1 ***- Q9FL87_ARATH)'	Cp	5	-	none	not Cp	N	72.4	plastid stroma	nucleus	-	-	0.23	0.04	No	Detected by both ITAG and Atlas
Solyc02g066950	Alpha amylase 3 (IC) IPR006589 Glycosyl hydrolase, family 13, subfamily, catalytic region	AMY3A	At1g69830	XP_004233383.1	MDYSTEALTDDEDGDSLGRSKVVGIDDDELLATRKSLSDVQARNKTIEKERDQLLEKVARSEAKQKEYLSTVMHDKDLAISELESAKALFNRKLEESLEEKFNLESKLVLAKQDAVELAVQVEKLAEIAFQQATSHILEDAQLRVSAAEASAAEAAFQIEEQIRTASDGAITYVLQQSKDAIEKALAVAESSGEHTTNAMAAFVDNMDRDDEIVTVQSQNIKLSNTLNDLESQLLVNRNEIDRVKLELKQARKEAKVYELRANDVEKLLLEFQESSRKAALQQEEEIKSSLEKMRKDATEKKKAASKAFKLELERMKTAIEAAKETARSQDEAYTRRCEALQRSLKAAEAASKTWRQRAEMAEDLLLRRSCSEEGDEEAIYRVNGGRIDFLMDDDSLKW…	10	23	10	0.931	0.00600357	826	5	1	6	'3.2.3.3.1.1'	'Carbohydrate metabolism.starch metabolism.degradation.hydrolysis and phosphorolysis.amylase activities.alpha amylase'	'mercator4v5.0: alpha amylase & swissprot: Alpha-amylase 3, chloroplastic & original description: Alpha amylase 2 (IC) (AHRD V1 *-*- Q010P9_OSTTA); contains Interpro domain(s) IPR006589 Glycosyl hydrolase, family 13, subfamily, catalytic region'	-	2	-	none	Cp	N	80.7	plastid stroma	plastid	plp_at_00133	-	0	0	No	Detected by both ITAG and Atlas
Solyc02g067050	Uncharacterized protein (AHRD V1 **-- B6SSQ6_MAIZE); contains Interpro domain(s) IPR003774 Protein of unknown function DUF179	-	At3g29240	XP_004233379.1	MEACFVTSKPLSEKLFPLLGSRVSYSTRRRSFVSQFHQPKKVGNPFSVTCCQASSPLPSPSPQDEERPFTETDWRSFRARLVAGERASRSEDRSSVVNPDTVDDLPPPPAVTIGSKWAHTIHEPEKGCILIATEKLDGVHIFERTVVLLLSMGPIGPMGLILNRPSLMSIKEMKPSVLDMSGTFANRPLFFGGPLEDELFLVSPNEDGLGKSGVFDEVMRGLYYGTKESVGCASEMVKRDVVGVDNFRFFDGYCAWEKDQLKDEIRAGYWTVAACSPSVIGLSDVGSVGLWDEVLGLMTPKKVW	2	2	2	0.425	0.00274062	1014	2	0	2	'35.2'	'not assigned.not annotated'	'mercator4v5.0: not classified & original description: Uncharacterized ACR COG1678 family protein (AHRD V1 **-- B6SSQ6_MAIZE); contains Interpro domain(s) IPR003774 Protein of unknown function DUF179'	Cp	4	Cp	Cp	Cp	Cp	66.5	plastid stroma	plastid	-	Cp	0.91	0	No	Atlas only
Solyc02g067180	Cystathionine gamma synthase (AHRD V1 ***- Q6R8F6_SOLLC); contains Interpro domain(s) IPR000277 Cys/Met metabolism, pyridoxal phosphate-dependent enzyme	CGS	At3g01120	NP_001234489.1	MAVSSYARAFPSFECRSEPDFSGSLPHPKAGVRFSGKYNSGSNRSQVYGLSSLIYRFPPNFVRQLSIKARRNCSNIGVAQVVAASWSNNQAGPEFTPAANAVDSSASAAVTSIGITTGDEEVAVVENADCSDQNVQIKGSTGVKYASFLNSDGSVAIHAGERLGRGIVTDAITTPVVNTSAYFFNKTSDLIDFKEKRRASFEYGRYGNPTTVVLEEKISALEGAESTLIVASGMCASTVMFLALVPAGGHIVTTTDCYRKTRVFIETILPKMGITATVIDPADMGALELALNQKKVDLFFTESPTNPFLRCVDIELVSKLCREKGALVCIDGTFATPLNQKALALGADLVVHSATKFLGGHNDVLAGCISGPEKLVSVIRNLHHILGGALNPNAAYLII…	11	57	11	3.217	0.0207449	437	5	3	8	'4.2.2.6.1.1'	'Amino acid metabolism.aspartate group amino acid biosynthesis.aspartate-derived amino acids.methionine.transsulfuration pathway.cystathionine gamma-synthase'	'mercator4v5.0: cystathionine gamma-synthase & swissprot: Cystathionine gamma-synthase 1, chloroplastic & original description: Cystathionine gamma synthase (AHRD V1 ***- Q6R8F6_SOLLC); contains Interpro domain(s) IPR000277 Cys/Met metabolism, pyridoxal phosphate-dependent enzyme'	Cp	3	-	Cp	Cp	Cp	99.8	-	plastid	-	Cp	0.7	0.05	No	Detected by both ITAG and Atlas
Solyc02g067360	Protease Do-like (S2 serine-type protease) (AHRD V1 **** Q7UQ70_RHOBA); contains Interpro domain(s) IPR001254 Peptidase S1 and S6, chymotrypsin/Hap	DEG8	At5g39830	XP_004233360.1	MEVIIVSSNAKTPIHLHTNQPQPPILNNSVFLGRRELCFDSISTVCSADPITSNPSTSVSAPRGGGDNGNSLIEQLRRSFPFATRRMLLTSFFMYSCYHPSRYLSALALGDPSVTVEQVTPTIFPSAALFPLEERVVELFEKNTYCVVNIFDVTLRPTLNVTGMVEIPEGNGSGVIWDKEGHIVTNYHVIGNSLSRNPSRGQVVARVNILAADGVQKNFEGILIGADRAKDLAVLKVGASEDLLRPIRVGESSSLRVGQQCLAIGNPFGFDHTLTVGVISGLNRDIYSQTGVTIGGGIQTDAAINPGNSGGPLLDSKGNLIGINTAIFTQTGTSAGVGFAIPSSTVLRVVPQLIQSGKVLRAGLNIEIAPDLIANQLNVRNGALVLLVPGNSPAAKAGL…	9	30	9	3.437	0.0221636	420	5	3	8	'19.4.2.3'	'Protein homeostasis.proteolysis.serine-type peptidase activities.DEG-type protease'	'mercator4v5.0: protease *(Deg) & swissprot: Protease Do-like 8, chloroplastic & original description: Protease Do-like (S2 serine-type protease) (AHRD V1 **** Q7UQ70_RHOBA); contains Interpro domain(s) IPR001254 Peptidase S1 and S6, chymotrypsin/Hap'	Cp	5	Cp	Cp	Cp	C	69.4	thylakoid-peripheral-lumenal-side	plastid	plp_at_01956	-	0.12	0.23	Yes	Detected by both ITAG and Atlas
Solyc02g067540	Methyltransferase (AHRD V1 *-*- B9LJG4_CHLSY); contains Interpro domain(s) IPR016065 Protein of unknown function methylase putative	-	At3g28460	XP_004233343.1	MAVSSSHTAFSFLSPLRSHSIVPETSLLSFNPALVGYPFTATNRRRPFIITVSSKSKNELSVDKKRQLLEQYGLNPDEYLSEPSPKTKKRREQSKSGTGKQVLVEEPKHTRETHKLLQVVGGTARRKKLLSPKSMDVRPMMEVVKAAAFGILQAAGGCPASLRPGRWLDLYSGTGSVGIEAISRGCSEVHFVEMDPWVVSDVLRPNLEWTGFLDASVIHTVRVESFLERAEHFLGKDGSFDYISVTPPYAVVDYSILMDQISKSSIVGENTFILVEYPFRTDMLDSCGCLVKISDRRFGRTHLAIYGPKWALKKKYVEKTKRKQEKLDLLKEVEISAS	1	1	1	0.179	0.00115428	1133	1	0	1	'16.2.6.1.8'	'RNA processing.RNA modification.RNA methylation.rRNA methylation.RsmD-type rRNA methyltransferase'	'mercator4v5.0: RsmD-type rRNA methyltransferase & original description: Methyltransferase (AHRD V1 *-*- B9LJG4_CHLSY); contains Interpro domain(s) IPR016065 Protein of unknown function methylase putative'	Cp	2	Cp	Cp	Cp	Cp	82.9	plastid	plastid	-	Cp	0.99	0.01	No	Detected by both ITAG and Atlas
Solyc02g068050	SAFEGUARD1, RbcL methyltransferase family protein	SAFE1	At5g14260	XP_010317061.1 Wang et al (2020)	MDLVYSSMAKCISAPFPSFTHRPLALFSRVSISPKYANARRLWKMCSASSSDTLVDNGPVKEGSKSLEVASKKEGEYGDLKSWMHENGLPPCKVVIKDRPSHDAKHLPIHYVAASEDLQAGDIAFAVPDSLVVTLERVLGNETIAELLTTNKLSELACLALYLMYEKKQGKKSFWYPYIRELDRQRARGQLAVESPLLWSDAELDYLTGSPTKADVLERAEGIKREYNELDTVWFMAGSLFQQYPYEIPTEAFPFEIFKQAFVAVQSCVVHLQKVSLARRFALVPLGPPLLSYCSNCKAMLAAVDGAVQLVVDRSYSAGDPIVVWCGPQPNSKLLINYGFVDEENSHDRLMVEAALNTEDPQYQDKRLAAQRNGKLSVQAFQVCVGKEREAVLEMLPYL…	5	21	5	1.783	0.0114977	637	5	2	7	'10.6.4.3'	'Redox homeostasis.reactive oxygen-induced signalling.singlet oxygen-induced signalling.protein lysine N-methyltransferase *(SAFE1)'	'mercator4v5.0: protein lysine N-methyltransferase *(SAFE1) & original description: SET domain-containing protein (AHRD V1 ***- D7M620_ARALY); contains Interpro domain(s) IPR001214 SET'	Cp	3	Cp	Cp	Cp	Cp	98.5	plastid stroma	plastid	-	Cp	0.99	0	No	ITAG only
Solyc02g068090	30S ribosomal protein S21, chloroplastic (Fragment) (AHRD V1 *--- RR21_SPIOL); contains Interpro domain(s) IPR001911 Ribosomal protein S21	RPS21	At3g27160	XP_004233297.1	MAVSSIANLFSFFNPSKPPTPKAPTLQFSPSAVDSLTSSRPNNDSSSMVVSSNDNHKYPILPVSSSDSDVMAVTCPSLAYANTLYFRSAYNVQVIVGDNEPEEKLLGRFRREVMRAGVIQECKRRRYFENSQDEKKRRTRDAARRNRRRRGPPRNFSDDKQETTKSKRDDDGEDNWELPDGGVAF	2	10	2	2.981	0.019223	463	5	2	7	'17.6.2.3.21'	'Protein biosynthesis.organelle machinery.plastidial ribosome biogenesis.small ribosomal subunit proteome.component *(bS21c)'	'mercator4v5.0: component *(bS21c) of small plastid ribosomal-subunit proteome & swissprot: 30S ribosomal protein S21, chloroplastic & original description: 30S ribosomal protein S21, chloroplastic (Fragment) (AHRD V1 *--- RR21_SPIOL); contains Interpro domain(s) IPR001911 Ribosomal protein S21'	Cp	1	Cp	Cp	Cp	N	99	plastid ribosome	plastid	plp_at_00304	Cp	0.65	0.01	No	Detected by both ITAG and Atlas
Solyc02g068350	Uncharacterized protein product (NCBI)	-	-	XP_004233274.1	MQHPPLFPFPVPSPENSRRNCVIAFTTPQNYAPRLSELIHLKGWTPLWCPTVIVESTEQTISSIHHYLNPQAGIDEPNSFLEEFSALAFTSRTGITAFSQALSMNPTPPLTPNGEILTIAALGNDAELLDRDFIRKMCENPERIRVLVPSVATPSGLVEALGLGQGRKVLCPVPLVIGLNEPPVVPKFLDDLSKRGWIPLRLDAYETRWAGATCAVDVVAKSEEECGFDAIVFTSTGEVEGLLKSLEEFGLDWSMVRRRCPRMVVAAHGPVTAAGAESLGVGIDVVSSNFGSFDGVVDALAHKWKSLQNQES	3	4	3	1.512	0.00975016	691	2	3	5	'35.2'	'not assigned.not annotated'	'mercator4v5.0: not classified & original description: Uroporphyrinogen-III synthase (AHRD V1 ***- Q3M8K2_ANAVT); contains Interpro domain(s) IPR003754 Tetrapyrrole biosynthesis, uroporphyrinogen III synthase'	Cp	4	-	none	Cp	P	54.8	-	-	-	-	0.03	0	No	Detected by both ITAG and Atlas
Solyc02g068700	Histidine triad (HIT) protein	HINT2	At1g31160	XP_004233245.1	MAAMSSLTLLRGPSLVKALGFIKTSNYIPRIVPASRYPLQSQRSYVASAHDEEAAARAAAVNADTGAPTIFDKIIAKEIPASVVYEDQKVLAFRDINPQAPVHVLIIPKSRDGLTELGKAEQRHEDILGNLLYAAKIVAEKEGIVDGFRVVINSGPSACQSVYHLHLHVLGGRQLKWPPG	7	36	7	3.924	0.025304	379	5	3	8	'50.3.6'	'Enzyme classification.EC_3 hydrolases.EC_3.6 hydrolase acting on acid anhydride'	'mercator4v5.0: EC_3.6 hydrolase acting on acid anhydride & swissprot: 14 kDa zinc-binding protein & original description: Histidine triad (HIT) protein (AHRD V1 **-- Q2MGQ9_MEDTR); contains Interpro domain(s) IPR001310 Histidine triad (HIT) protein'	M	4	-	possibly M	Cp	Cp	98.42	plastid stroma	plastid	-	Cp	0.54	0	No	Detected by both ITAG and Atlas
Solyc02g068730	Chaperonin 60 subunit alpha 2, chloroplastic	CPN60-A2	At5g18820	XP_004233243.1	MSLSMCSPLYSPLKLSFKEDKGKGNSWGLRQSLGKKKLMVVRAGPKRIAFDKECRRALLSGINKLADAVSVTLGPRGRNVVLSEAGGLKIINDGVTIAQAIELPDTIENAGATLIQEVATKTNRLAGDGTTTAIVLAREMIKAGLLAVDFGANPVSMKKGMDQTVRELVNTLKKKSHPVRGNDDIKAVASISAGNDEFIGSLIAEAINKIGPDGVICIESSSSAETSIMVEEGMKIDKGYMSPHFINNPEKSIVEFENAKVLVTDQKICSVKEIVPLLEKATQLSVPLLIFAEDITNQVLETLVINKMQGMLNVAVVQCPGFRDGKKGVLQDIAMLTGADFLSGDLGLTLESATSDQLGIARKITITSNSTTIVAHPSTKAEIQARIMQIKKDLAETDN…	3	4	2	0.334	0.00215381	1049	2	0	2	'1.1.8.1.6.2.1'	'Photosynthesis.photophosphorylation.chlororespiration.NADH dehydrogenase-like (NDH) complex.assembly and maintenance.Cpn60 chaperonin heterodimer.subunit alpha'	'mercator4v5.0: subunit alpha of Cpn60 chaperonin complex & swissprot: Chaperonin 60 subunit alpha 2, chloroplastic & original description: chaperonin (AHRD V1 ***- B2IXD2_NOSP7); contains Interpro domain(s) IPR001844 Chaperonin Cpn60'	-	5	-	possibly Cp	Cp	Cp	91	plastid stroma	plastid	-	Cp	0.82	0.04	No	Detected by both ITAG and Atlas
Solyc02g068930	Cytochrome c6 (AHRD V1 ***- D7MKY9_ARALY); contains Interpro domain(s) IPR003088 Cytochrome c, class I	PETJ	At5g45040	XP_004233233.1	MTVLCMIPSCLSKSCSLANPTKSRNVYEGDKPFVQRENKLACELKLLKSLALPLMTAFIALSPIVNPPVSIGQTTDVQKGASLFNRACIGCHYEGGNIIQPGATLFLKDLQRNGVDTEEEIYRVTYNGKGRMPGFGQNCTPRGQCTFGPRLQDDEIKLLAEFVKSQADQDWPKIENSGD	2	10	2	0.425	0.00274062	1015	5	2	7	'1.1.3.2'	'Photosynthesis.photophosphorylation.Cytb6/f to PS-I electron carriers.cytochrome hemoprotein *(Cytc6a)'	'mercator4v5.0: cytochrome electron carrier *(Cytc6a) & swissprot: Cytochrome c6, chloroplastic & original description: Cytochrome c6 (AHRD V1 ***- D7MKY9_ARALY); contains Interpro domain(s) IPR003088 Cytochrome c, class I'	Cp	4	-	none	Cp	Cp	99.3	thylakoid-peripheral-lumenal-side	-	-	Thylakoid	0.09	0.86	No but known to be lumenal	Detected by both ITAG and Atlas
Solyc02g069010	Inositol monophosphatase family protein (AHRD V1 **** D7KK98_ARALY); contains Interpro domain(s) IPR000760 Inositol monophosphatase	IMPL1	At1g31190	XP_004233230.1	MGRCLLSSTISSLRICQLPRIRLPVFPKSRSTNSQYGFCTSLSTGGGFCTKAALSEVGIKKEYSKVAADSTGSIPSSELLKVVEAAAKTGAQVVMDAVNKPRNVTYKGLTDLVTDTDKNSEFAILEVVRKNFPDHLILGEEGGIIGDSSSDYLWCIDPLDGTTNFAHGYPSFAVSVGVLFRGKPAAAAVVEFVGGPMCWNTRIFSAAAGKGAFANGEKIHVSRTDKVEQSLLVTGFGYEHDDPWATNMELFKEFTDVSRGVRRLGAAAVDMCHVALGIAEAYWEYRLKPWDMAAGVLIVEEAGGTVSCMDGGSFSVFDRSVLVSNGLLHAKLLEKIGPATENLKSKGIDFSVWFKPENYHTEV	6	58	6	4.179	0.0269484	361	5	3	8	'27.6.1.4.2'	'Multi-process regulation.phosphoinositide signalling.inositol phosphate metabolism.inositol monophosphate phosphatase activities.inositol-phosphate monophosphatase *(IMPL)'	'mercator4v5.0: inositol-phosphate monophosphatase *(IMPL) & swissprot: Phosphatase IMPL1, chloroplastic & original description: Inositol monophosphatase family protein (AHRD V1 **** D7KK98_ARALY); contains Interpro domain(s) IPR000760 Inositol monophosphatase'	M	5	Cp	none	Cp	C	86.5	plastid stroma	plastid	plp_at_02394	Cp	0.54	0.01	No	Atlas only
Solyc02g069130	Peptidyl-prolyl cis-trans isomerase (AHRD V1 *-*- B1WW43_CYAA5); contains Interpro domain(s) IPR001179 Peptidyl-prolyl cis-trans isomerase, FKBP-type	FKBP17-1	At4g19830	XP_004233225.1 Waseem et al (2018)	MRMIKVLPLPCPTYLYLHKIEASTSSTHKSRRAFSLSALTISLSALVFSSGNAPTTSISWANPQVPKFLDLPNSGGVKALDLRVGDGETPIDGDLVAIHYYGRLAAKQGWRFDSTYDHKDETGEPIPFSFVLGSGKVISGIETAVKSMKVGGLRRVIIPPSQGYQNTSQEPLPPNYFDRQRLFTTIFNPTRLANGEGATLGTVIFDIELVSLRHL	3	8	3	1.683	0.0108529	655	5	3	8	'18.13.2.13'	'Protein modification.protein folding.FKBP-type chaperone activities.peptidyl-prolyl cis-trans isomerase *(FKBP17-1)'	'mercator4v5.0: peptidyl-prolyl cis-trans isomerase *(FKBP17-1) & swissprot: Peptidyl-prolyl cis-trans isomerase FKBP17-1, chloroplastic & original description: Peptidyl-prolyl cis-trans isomerase (AHRD V1 *-*- B1WW43_CYAA5); contains Interpro domain(s) IPR001179 Peptidyl-prolyl cis-trans isomerase, FKBP-type'	M	5	Cp	none	Cp	ER	98.4	-	-	-	Thylakoid	0.07	0.78	No but known to be lumenal	Detected by both ITAG and Atlas
Solyc02g069410	HAD-superfamily hydrolase subfamily IA variant 3 containing protein expressed (AHRD V1 *-*- Q10I42_ORYSJ)	-	At5g45170	XP_004233201.1	MAIERASCPVLNTLRFCTKNSSKLYNFPRKHLQFPSFFPRNFNSINGKLYTHGLFLNSSSSFSNTTQETPSQKLALLLEVEGVLMDVDRLGNRQAFNTAFRKLGLDCANWSQPVYQDLVKKSMGDEERMLVLFFNRIGWPTSLPTSEKETFMKTVLREKRIALDELVMSKTLPLRPGVEEFIDEACEEGVPVVMLTAYCKSGEKQVRSIIEKLGNDKMAKIKIIGTEEVKRSAYGQLVLGEGVASDLGEQLAKEARKAVSAEEQRIAKEVASILKLTVDIDTTSSEGLQNVVAALRAGAEYADVPVHNCVLVSGSLSGVAGAERIGMSCVVVRSSSTARAEFPGAKAIMDGFGGADLTISRLRQIQES	9	31	9	4.08	0.02631	369	5	3	8	'35.1'	'not assigned.annotated'	'mercator4v5.0: not classified & swissprot: CBBY-like protein & original description: HAD-superfamily hydrolase subfamily IA variant 3 containing protein expressed (AHRD V1 *-*- Q10I42_ORYSJ)'	Cp	4	Cp	possibly Cp	Cp	M	54.8	plastid stroma	plastid	-	Cp	0.37	0.08	No	Detected by both ITAG and Atlas
Solyc02g069450	Photosystem I reaction center subunit III (AHRD V1 ***- Q9XQB4_PHAAU); contains Interpro domain(s) IPR003666 Photosystem I reaction centre protein PsaF, subunit III	PSAF	At1g31330	XP_004233199.1	MASSLFNVLFVWKLKKNTMSLTIPSNLSKPISTSKFGSQFTTKQRTSSIVCSSNQTPVSNSTEESSSSLKAFSAALALSSILLSAPVLPASADISGLTPCKDSKQFAKREKQQIKKLQNSLKLYSPDSAPALAINATIEKTKRRFDNYGKQGLLCGSDGLPHLIVSGDQRHWGEFITPGILFLYIAGWIGWVGRSYLIAVRDEKKPTMKEIIIDVPLANRLVWRGFIWPVAAYREYLNGDLIDPNV	3	4	1			1255	0	1	1	'1.1.4.2.6'	'Photosynthesis.photophosphorylation.photosystem I.PS-I complex.component *(PsaF)'	'mercator4v5.0: component *(PsaF) of PS-I complex & original description: Photosystem I reaction center subunit III (AHRD V1 ***- Q9XQB4_PHAAU); contains Interpro domain(s) IPR003666 Photosystem I reaction centre protein PsaF, subunit III '	Cp	3	Cp	Cp	Cp	Cp	100	thylakoid-integral	plastid	plp_at_00072; plp_at_01156; plp_at_01317; plp_at_01719	Thylakoid	0.101112	0.898604	NA	Detected by both ITAG and Atlas
Solyc02g069460	Photosystem I reaction center subunit III (AHRD V1 ***- Q9XQB4_PHAAU); contains Interpro domain(s) IPR003666 Photosystem I reaction centre protein PsaF, subunit III	PSAF	At1g31330	XP_004233198.1	MSLTIPTSLSKPISTSKFGSQFTTKQRTSAIVCCSNQTPVSNSTEESSSSLKAFSAALALSSILLSAPVLPASADISGLTPCKDSKQFAKREKQQIKKLQNSLKLYAPDSAPALAINATIEKTKRRFDNYGKQGLLCGSDGLPHLIVSGDQRHWGEFITPGILFLYIAGWIGWVGRSYLIAVRDEKKPTMKEIIIDVPLANRLVWRGFIWPVAAYREYLNGDLIDPNV	3	3	1	1.154	0.00744159	766	2	1	3	'1.1.4.2.6'	'Photosynthesis.photophosphorylation.photosystem I.PS-I complex.component *(PsaF)'	'mercator4v5.0: component *(PsaF) of PS-I complex & swissprot: Photosystem I reaction center subunit III, chloroplastic & original description: Photosystem I reaction center subunit III (AHRD V1 ***- Q9XQB4_PHAAU); contains Interpro domain(s) IPR003666 Photosystem I reaction centre protein PsaF, subunit III'	Cp	1	Cp	Cp	Cp	Cp	100	thylakoid-integral	plastid	plp_at_00072; plp_at_01156; plp_at_01317; plp_at_01719	Thylakoid	0.04	0.96	Yes	ITAG only
Solyc02g069620	Ribose 5-phosphate isomerase-like (AHRD V1 ***- Q2LC22_9ASTR); contains Interpro domain(s) IPR004788 Ribose 5-phosphate isomerase	RPI4	At5g44520	XP_004233185.1	MSNMAMAMALPSSTSPFLFSCTTQKQAHNFTSSRKPLHRFVTRSTLSDDLFLAAKHTVDSYVKNGMVVGLGSGHASTLAIQYLGQKLRAGTIKDVTAIPTCVSSASEAAKAGIPLEQYDDSLKIDLAFDEADIMEEETLAAIIGRRKLQGDDSIIKEKTILEAADQLIFIIKEKQFKGGVEGSVPVLIKSVNWLETAEEIDDLFLGDAEVWRRPAIGYAGPLGGDFPLVTKEGHNILDVIFTSPIESLVEVAKILDQIDGVVEHGVIFRKPCTAIIASENDLQIVDNTFLMESSNF	5	32	5	5.31	0.0342416	305	5	3	8	'35.1'	'not assigned.annotated'	'mercator4v5.0: not classified & swissprot: Probable ribose-5-phosphate isomerase 4, chloroplastic & original description: Ribose 5-phosphate isomerase-like (AHRD V1 ***- Q2LC22_9ASTR); contains Interpro domain(s) IPR004788 Ribose 5-phosphate isomerase'	Cp	3	Cp	Cp	Cp	Cp	98.6	plastid stroma	plastid	-	Cp	0.9	0.1	No	Detected by both ITAG and Atlas
Solyc02g070390	PTAC12 (AHRD V1 ***- D7LH29_ARALY)	pTAC12 HEMERA	At2g34640	XP_010315857.1	MASVLSTSLYQDRGLRIVASTDGFVPTICCPYRKTLFTGTTPVSIWKLKFVSSSPFQKAPLAPCIKCENKEKNQGSFEQVSVERFPYHSYMDSTSGQLEPASGARASIPGKEYWPEGTASRVQAARAPEPDGISTGTPSYGKAPGSRRKKYKASASSSQPSEINVISDDPLETPDSVPEEPKDLSSEYVIYQPEQDEEELTGYELDKRHGRPHPFIDPKVKKEIEKPLTSEELWWNWRKPEKEQWSRWQRRRPDVETVFLKAMAETGQVKLYGEHPTLTETALYRARRHLYKEERLQAEKEKMEKIGPIAYYSEWVKAWKRDTSRDAIQKHFEETGEDENTQLIEMFSHQTDREYRIMMGTDMRIPRDPLAMRMREDQIKQIWGGDPVYPTINYIQDPD…	6	14	6	0.995	0.00641628	811	5	0	5	'15.6.1.2.2.5'	'RNA biosynthesis.organelle machinery.RNA polymerase activities.plastid-encoded RNA polymerase (PEP) complex.essential co-factor components.component *(PAP5/TAC12)'	'mercator4v5.0: cofactor of plastid-encoded RNA polymerase *(PAP5/TAC12) & swissprot: Protein PLASTID TRANSCRIPTIONALLY ACTIVE 12, chloroplastic & original description: PTAC12 (AHRD V1 ***- D7LH29_ARALY)'	-	5	Cp	Cp	not Cp	C	92.2	plastid nucleoid; nucleus	plastid	plp_at_00212	-	0.35	0	No	Detected by both ITAG and Atlas
Solyc02g070490	Chlorophyll dephytylase1, CLD1; Alpha_beta hydrolase fold IPR000073 Alpha_beta hydrolase fold-1	CLD1	At5g38520	XP_004233123.1	MKATTIWGLKKRRGTCDLKHFLPQEASLFSVLLCKKHKYSHCAASLSMKAMVVAVRASPLVFLPSSPFAASRNLKKQCSNTIISFNIRLQSSHSKSSCITISSIKCSASSTSAIVSKEEEPLPLEVNEIKTLCKTWVWRGYNINYLSYPGHNNDTCRPSLLLVHGFGASVAHWRRNIATLAQNYRVYAIDLLGFGASDKPEGFAYNMETWAELILDFVNQVIQRPTVLVGNSVGSLACVIAAADPSQTSIQGLVLLNCAGGMNNKAIVDDWRIKLLSPLLWLVDFLLSQKPIASSIFTRVKQRENLKNILLSVYGNKESVDEDLVDIIRTPADSEGALDAFVSIVTGPPGPNPVQLIPKMTLPILVLWGDQDPFTPIDGPVGRYFSSLPSQKPNVSLFL…	4	16	4	0.778	0.00501695	869	5	2	7	'7.15.3.2'	'Coenzyme metabolism.chlorophyll metabolism.chlorophyll catabolism.chlorophyll dephytylase *(CLD)'	'mercator4v5.0: chlorophyll dephytylase *(CLD) & swissprot: Pheophytinase, chloroplastic & original description: Alpha/beta hydrolase fold (AHRD V1 ***- B6SU76_MAIZE); contains Interpro domain(s) IPR000073 Alpha/beta hydrolase fold-1'	-	2	-	possibly M	Cp	Cp	54.13	thylakoid	plastid	plp_at_01582	-	0.05	0.03	Yes	Detected by both ITAG and Atlas
Solyc02g070770	Uncharacterized protein At2g34460, chloroplastic (NCBI); NAD-dependent epimerase/dehydratase (AHRD V1 **-- B8HW76_CYAP4); contains Interpro domain(s) IPR016040 NAD(P)-binding domain	-	At2g34460	XP_004233107.1	MATATGLFFLKTSAFSITSKRPSVSLFVNKVHSFRLRAANIEESEIEGEEEVGISEKKKIFVAGATGNTGKRIVEQLLAKGFAVKAGVLDVDKAKSTLPGQNPDLQIVKADVTEGSVRLADAIGNDSDAVICATGFRRSLDFLAPWKVDNFGTVNLVEACRTLGVKRFLLVSSILVNGAAMGQLFNPAYVFLNVLGLTLIAKLQAEQYIRRSGINYTIIRPGGLKNDPPQGNIVMEQEDTLYEGSISRDQVAEVAVEALLHPESHYKVVEIVARTDAPKRSFKELFGSIKQQ	7	25	7	2.415	0.0155732	539	5	3	8	'35.1'	'not assigned.annotated'	'mercator4v5.0: not classified & swissprot: Uncharacterized protein At2g34460, chloroplastic & original description: NAD-dependent epimerase/dehydratase (AHRD V1 **-- B8HW76_CYAP4); contains Interpro domain(s) IPR016040 NAD(P)-binding domain'	Cp	4	Cp	possibly Cp	Cp	Cp	83.7	plastoglobules	plastid	-	Cp	0.78	0.02	No	Atlas only
Solyc02g070790	3-oxoacyl-(Acyl-carrier-protein) synthase 2 (AHRD V1 **** D0ZZB8_CHLPP); contains Interpro domain(s) IPR017568 3-oxoacyl-[acyl-carrier-protein] synthase 2	KAS1	At5g46290	XP_004233105.1	MEAIQSLSFRPSPLEPLRKNIPQFTNVRSLGAKRVPLTVTASASTVSAPKREKDPKKRVVITGTGLVSVFGNDADTYYDRLLAGESGISLIDRFDASKFPTRFGGQIRGFTSEGYIDGKNDRRLDDCLRYAIVAGKKALENADLGGDRLEKIDKERAGVLVGTGMGGLTVFSDGVQNLIEKGHRKITPFFVPYAITNMGSALLGIDLGFMGPNYSISTACATSNYCFYAAANHIRRGEADLMLAGGTEAAIIPIGLGGFVACRALSQRNDDPQTASRPWDKERDGFVMGEGAGILVMESLEHAMKRGAPIIAEYLGGAVNCDAYHMTDPRADGLGVSSCILSSLEDAGVSPEEVNYINAHATSTIVGDLAEINAVKKVFKTTTGIKMNATKSMIGHCLG…	9	42	8	9	0.0580367	168	5	3	8	'5.1.4.2.1'	'Lipid metabolism.fatty acid metabolism.plastidial fatty acid synthase (ptFAS) system.ketoacyl-ACP synthase (ptKAS) activities.ketoacyl-ACP synthase I'	'mercator4v5.0: ketoacyl-ACP synthase I & swissprot: 3-oxoacyl-[acyl-carrier-protein] synthase I, chloroplastic & original description: 3-oxoacyl-(Acyl-carrier-protein) synthase 2 (AHRD V1 **** D0ZZB8_CHLPP); contains Interpro domain(s) IPR017568 3-oxoacyl-[acyl-carrier-protein] synthase 2'	Cp	2	Cp	Cp	Cp	Cp	91.7	plastid stroma	plastid	plp_at_01594; plp_at_02609	Cp	0.92	0.02	No	ITAG only
Solyc02g070800	Uncharacterized Ycf23 protein (AHRD V1 ***- Q7NE74_GLOVI); contains Interpro domain(s) IPR007570 Protein of unknown function DUF561	YCF23	-	XP_004233104.1	MSISLYTPVSPKNQLQVFLKPNQNPLLLGDSVFPKRVSFARRKCTTRALLSHSKDAVLKEFHEKKALKIIAGLQNLDKENVASVVTAADKGGATHVDIACDPELVKLAISLTSLPVCVSSVDPSAFPAAVEAGALMVEIGNYDSFYEKGLVFSPEQILNLTKETKKLLPSVILSVTVPHTLSLPDQVKLAEQLELEGVDIIQTEGGKCSTPSKAGILGLIEKATPTLAAAYSISRAVNIPVMCSSGLSAVTAPMAIVAGAAGVGVGSAINKLNDQVAMIAEVKSIAHSLGLSTKKQNLFEGSNLIV	4	17	4	1.61	0.0103821	670	5	3	8	'35.2'	'not assigned.not annotated'	'mercator4v5.0: not classified & original description: Ycf23 protein (AHRD V1 ***- Q7NE74_GLOVI); contains Interpro domain(s) IPR007570 Protein of unknown function DUF561'	Cp	4	Cp	Cp	Cp	Cp	98.6	-	-	-	Cp	0.91	0.02	No	Detected by both ITAG and Atlas
Solyc02g070940	Chlorophyll a/b binding protein (AHRD V1 **** Q41422_SOLTU); contains Interpro domain(s) IPR001344 Chlorophyll A-B binding protein	LHCB1.4	At2g34430	NP_001316856.1	MAAATMALSSPSFAGQAVKLSPSASEISGNGRITMRKAVAKSAPSSSPWYGPDRVKYLGPFSGESPSYLTGEFPGDYGWDTAGLSADPETFAKNRELEVIHCRWAMLGALGCVFPELLARNGVKFGEAVWFKAGSQIFSEGGLDYLGNPSLVHAQSILAIWACQVVLMGAVEGYRIAGGPLGEVVDPLYPGGSFDPLGLAEDPEAFAELKVKEIKNGRLAMFSMFGFFVQAIVTGKGPLENLADHLADPVNNNAWAFATNFVPGK	2	4	0			1256	0	3	3	'1.1.1.1.1'	'Photosynthesis.photophosphorylation.photosystem II.LHC-II complex.component *(LHCb1/2/3)'	'mercator4v5.0: component *(LHCb1/2/3) of LHC-II complex & original description: Chlorophyll a/b binding protein (AHRD V1 **** Q41422_SOLTU); contains Interpro domain(s) IPR001344 Chlorophyll A-B binding protein '	Cp	2	Cp	Cp	Cp	Cp	100	thylakoid-integral	plastid	plp_at_00209; plp_at_01045; plp_at_01189; plp_at_01382; plp_at_01774	Cp	0.997395	0.001343	NA	Detected by both ITAG and Atlas
Solyc02g070980	Chlorophyll a_b binding protein IPR001344 Chlorophyll A-B binding protein	LHCB1.4	At2g34430	NP_001316869.1	MAAAAMALSSPSFAGQAVKLSPSASENSGNGRITMRKAVAKSAPSSSPWYGPDRVKYLGPFSGESPSYLTGEFPGDYGWDTAGLSADPETFAKNRELEVIHCRWAMLGALGCVFPELLARNGVKFGEAVWFKAGSQIFSEGGLDYLGNPSLVHAQSILAIWACQVVLMGAVEGYRIAGGPLGEVVDPLYPGGSFDPLGLAEDPEAFAELKVKEIKNGRLAMFSMFGFFVQAIVTGKGPLENLADHLADPVNNNAWAFATNFVPGK	2	4	0			1257	0	3	3	'1.1.1.1.1'	'Photosynthesis.photophosphorylation.photosystem II.LHC-II complex.component *(LHCb1/2/3)'	'mercator4v5.0: component *(LHCb1/2/3) of LHC-II complex & original description: Chlorophyll a/b binding protein (AHRD V1 **** Q41422_SOLTU); contains Interpro domain(s) IPR001344 Chlorophyll A-B binding protein '	Cp	2	Cp	Cp	Cp	Cp	100	thylakoid-integral	plastid	plp_at_00209; plp_at_01045; plp_at_01189; plp_at_01382; plp_at_01774	Cp	1	0	NA	Detected by both ITAG and Atlas
Solyc02g071040	Starch synthase IV, Glycogen synthase (AHRD V1 *-*- D1R4V0_9CHLA); contains Interpro domain(s) IPR011835 Glycogen/starch synthases, ADP-glucose type	SS4	At4g18240	NP_001234617.2	MEMKISNCFPTQKWCGGASLSRQVNVRFYPLPSQRLPPASGKMRQRRNFSLQNKKKQTKTINIERPPDVDLQLSDDIDSDTEKMSKQSLSNSNQEVPIEENVDTSTETKSSDESTYSSVDSNEEGQPSSVHLKDLIGMIRNAEKNIHLLNEARVHALEELQKVLGEKEDLHGKINILEMKLAETDARLRVASQEKIHVELLEDQLGKLKNELSSSRGSEENVLHVNNSVPLSRSDLVNSLSEQCDSLRKENMLLKQDLQSMKSELSLVKETDERILMLEKERSVLESSLSELESKLAASQEGVSELSALKLECKNLYEKVEHLQALLAKATKQADQAISVLQQNQELRKKVDRLEESLEEASIYKLSSEKLQQYNEQMQQKIKLLDERLQRSDEEIQSY…	6	10	6	0.326	0.00210222	1061	4	0	4	'3.2.2.4.4'	'Carbohydrate metabolism.starch metabolism.biosynthesis.starch synthase activities.starch synthase *(SS4)'	'mercator4v5.0: starch synthase *(SS4) & swissprot: Probable starch synthase 4, chloroplastic/amyloplastic & original description: Glycogen synthase (AHRD V1 *-*- D1R4V0_9CHLA); contains Interpro domain(s) IPR011835 Glycogen/starch synthases, ADP-glucose type'	Cp	4	Cp	Cp	Cp	Cp	88.4	plastid	plastid	plp_at_00419	-	0.07	0	No	ITAG only
Solyc02g071190	Carboxyl-terminal-processing protease (AHRD V1 ***- B6SPN8_MAIZE); contains Interpro domain(s) IPR004447 Peptidase S41A, C-terminal protease	CTPA1	At5g46390	XP_010316905.1	MRLLHSPLPSPSPPLLTSFSPIKASISPKKSSFVSHHEPLQQLLSTGVSLVLSLGLLVSAPISIALESPSLQSSNSSLEVICRENEGEEVYEKDTEVSKVVSNENIVEEAWQIVNDSFLNTSDRRSWSPESWLQKKDDILSSSIQTRSKAHDIIKRMLASLGDPYTRFLSPEQFSKMARYDMTGIGVNLRDVPDGNGGSKLKVLGLLLDGPAHNAGVRQGDELISVNGVDVLGKSSFEASSLLLGPNGTSVNIMVKHGNCGPVQSIDVERQSIAKTPVFYRLDQIENGSTSVGYVRLKEFNALARKDLVTAIKRLEGMGASSFVLDLRDNLGGLVQAGIEIAKLFLNEGDTVIYTVGRDPQNTRNIVAEAPPLITAPVIVLVNKSTASASEIVATALHD…	14	48	14	5.062	0.0326424	321	5	3	8	'18.11.3.3'	'Protein modification.targeting peptide maturation.plastid.carboxy-terminal processing peptidase *(CtpA)'	'mercator4v5.0: carboxy-terminal processing peptidase *(CtpA) & swissprot: Carboxyl-terminal-processing peptidase 1, chloroplastic & original description: Carboxyl-terminal-processing protease (AHRD V1 ***- B6SPN8_MAIZE); contains Interpro domain(s) IPR004447 Peptidase S41A, C-terminal protease'	Cp	2	Cp	none	Cp	Cp	70.5	thylakoid-peripheral-lumenal-side	plastid	plp_at_01958	Thylakoid	0.01	0.98	No but known to be lumenal	ITAG only
Solyc02g071280	Ribosome maturation factor rimM (AHRD V1 *-*- A4CTC3_SYNPV); contains Interpro domain(s) IPR011961 16S rR processing protein RimM	-	At5g46420	XP_004232981.1	MQGSSALSCSSNSISAPVGLCCSQRLTLPFRNQRIGFLENPSSLKIFHFHRNTTLPLLNCTATEEIVEASETEGLFVETGYIYSVHGLQGEVRVKATTDFPELRFSQPGRRWLRQQVTGRDMIQEIELVEGRGHPGQKSWILKFHEINTIEQAQKLVGSALLVKNEDRPILEEGEFYTPDLVGMKVFLKETRELVGTVINVFNSGASDLLHVELLPNQNARPQLEGSASGPLVWVPFVEAIVPNIDLSKREMLITPPKGLLELNIRADERSKKERRQLEWKERKKSQKRLIAAKKILHEMEQDHIFHGFRYGEKNQRSFLANQIVDVNSILLQHALQNKKIPYKRWSFPDFVNALQVNNTLKLSKEFFSKENVEHSSIVSKVQEQGHCLISSGKVAIVL…	1	1	1	0.105	0.000677094	1199	1	0	1	'35.2'	'not assigned.not annotated'	'mercator4v5.0: not classified & original description: Ribosome maturation factor rimM (AHRD V1 *-*- A4CTC3_SYNPV); contains Interpro domain(s) IPR011961 16S rRNA processing protein RimM'	Cp	2	Cp	possibly Cp	Cp	Cp	90.7	plastid stroma	plastid	-	Cp	0.98	0	No	ITAG only
Solyc02g071710	GDSL esterase_lipase At1g29670 IPR001087 Lipase, GDSL	-	At1g29670	XP_004233007.1	MGSGMKIWFVLLTTIFVINFRPFLVMVKGEPQVPCLFIFGDSLFDNGNNNDLLTTAKANYPPYGIDFPDGPTGRFTNGKNSADFLAELLGFNKFIEPFATVKGVDIVRGVNYASGAAGIRDESGIHLGDRISLNRQLRNHKVTISHMSTLLGNKTLTMDYLSKCIYIVGMGNNDYINNYLMPQFYPSSHLYNPEKFATILMQQYSKQLKTLYHYGARKVAVFGVGSLGCIPAELAMYGTKDTICVDSINSAVQKFADKFKPMIDDFNNNLPSANFIYINLTSIAIGDPAQIGLTNLAEPCCEISSVIAKGQCLKGGGACSDRASHYFWDGFHPTEIPNKVTAIRAYTALLPTDAYPFDISHLAATTLALNKIGQSGAEII	7	21	6	3.394	0.0218863	426	5	3	8	'35.1'	'not assigned.annotated'	'mercator4v5.0: not classified & swissprot: GDSL esterase/lipase At1g29670 & original description: GDSL esterase/lipase At1g29670 (AHRD V1 ***- GDL15_ARATH); contains Interpro domain(s) IPR001087 Lipase, GDSL'	S	1	-	ER	Cp	ER	98.2	-	extracellular	plp_at_00066	ER	0	0	No	Detected by both ITAG and Atlas
Solyc02g071890	Histidinol dehydrogenase IPR012131 Histidinol dehydrogenase, prokaryotic-type	HIS-N8	At5g63890	NP_001308679.1	MKSYKLSELTTSEVDSLKARPRIDFSSIFGTVQPIVDDVRNRGDAAVKDYTSRFDKVVLDKIVEDVSELPDPELDSSVREAFDVAYNNIYAFHAAQKPVEKVVENMHGVRCKRVARSIASVGLYVPGGTAVLPSTALMLSVPAQIAGCKTVVLATPPSRDGSICKEVLYCAKKAGVTHILKAGGAQAISAMAWGTESCPKVEKIYGPGNQYVTAAKMILQNSEAMVSIDMPAGPSEVLVIADKHSSPVHVAADLLSQAEHGPDSQVVLVIAGDGVDLNAIQEEIMKQCQALPRGEFALKALSHSFTVLARDMLEAISFSNMYAPEHLIINVDEAEKWENLIENAGSVFMGKWTPESVGDYASGTNHVLPTYGYARMYGGVSLDSFLKYITVQSLTEEGL…	12	43	12	6.079	0.0392005	268	5	3	8	'4.1.2.9'	'Amino acid metabolism.glutamate group amino acid biosynthesis.histidine.histidinol dehydrogenase'	'mercator4v5.0: histidinol dehydrogenase & swissprot: Histidinol dehydrogenase, chloroplastic & original description: Histidinol dehydrogenase (AHRD V1 **** B9GH07_POPTR); contains Interpro domain(s) IPR012131 Histidinol dehydrogenase, prokaryotic-type'	-	2	-	none	Cp	C	95.76	plastid stroma	plastid	plp_at_02611	-	0	0	No	ITAG only
Solyc02g072160	NAD(P)-binding Rossmann-fold superfamily protein	-	At4g18810	XP_010316841.1	MNPERKPQEQEWRESERGKLAFGKMESCYFSVTKPSSSSTILNFQGVSSLGGRSSQKSLGAPSHLSWPLSGPNKKSQNFVYRRKTFKGPILAEAGKQVNSMDSSGITLVTGATGGVGRRVVDVLRNKKLSVRVLVRNEEKARRMLGEDVDLVVGDVTKASTLLPEYFKGITSVINAVSVIVGPKEGDTPDREKYSQGIKFFEPEIKGDSPEMVEYVGMKNLINAVKKNLGIRTGKLLFGYEGNSFKELPWGALDDVVMGGVSQSTFQIDLTGGENGGPTGLFKGVVTTANNGGFASIRTKNFSEPEDLSAYDGLELRLKGDGRRYKLIVRTSSDWDTVGYTAIFDTVEGWQSVRLPFSSLRPIFRARTVLDASPFDPSQITSLQLMFSKFESDGKLNPT…	11	84	11	3.047	0.0196486	457	5	3	8	'35.1'	'not assigned.annotated'	'mercator4v5.0: not classified & swissprot: Protein HIGH CHLOROPHYLL FLUORESCENCE PHENOTYPE 173, chloroplastic & original description: NADH ubiquinone oxidoreductase complex I intermediate-associated protein 30 (AHRD V1 **-- B2IZH1_NOSP7); contains Interpro domain(s) IPR013857 NADH:ubiquinone oxidoreductase intermediate-associated protein 30'	-	4	-	none	Cp	N	56.3	plastid stroma	plastid	-	-	0	0	No	Detected by both ITAG and Atlas
Solyc02g072260	SAP-like protein BP-73 [Solanum lycopersicum, 4e-179, 97.33%], NCBI, manual annotation	-	At4g18740	XP_004233069.1	MGATATAVFSSNSISQLPSFSALCKPNLGIRIPKGVLFNLAEITYGLSLSTNRRDFHCSTLSTIRADGIRRRKSSKDATPGKTSKGSELNIQPSPDSKLPNSLNQEEIISLFKRIQSSISKGDSTSSKKRSTKSSEERPAIDSVLEILRHSKTEAKGTKDDKGSTHQEDQKEPETDYSPTADPRSTRLRSSFVKRSPLQSPFNSKEKVKLKMETSLENHVESEAVKIEEMKLPQLKELAKSRGLKGYSKLKKSELVELLIGC	3	4	3	0.778	0.00501695	870	3	0	3	'35.2'	'not assigned.not annotated'	'mercator4v5.0: not classified & original description: H2B histone-fold-like protein (Fragment) (AHRD V1 ***- A7VMP7_TOBAC); contains Interpro domain(s) IPR011112 Rho termination factor, N-terminal'	Cp	3	Cp	Cp	Cp	N	41	-	nucleus	-	Cp	0.64	0	No	Detected by both ITAG and Atlas
Solyc02g076720	Phosphoribosylformylglycimidine synthase IPR010073 Phosphoribosylformylglycimidine synthase, eukaryotes and proteobacteria	PUR4	At1g74260	XP_004233026.1	MVSEKINSYPSTITVSTPPTIEIYVSLPFLTINFPRILQQVLAMATSAWDIAATEFLQGFHRQKLALPRHSSKQTNLLLWGTLPRQSSFGYSHKNLRLRSHIPAKISAVVSGNVSSLVDENSGKVQEVAENLIHLYRVPFLQDSATAELLKLVQTKISNQIIGLKTEQCFNVGLKSDLSSDKFSVLKWLLGETYEPESLGSESFLEREQRKHPDAYIVEVGPRLCFTTAWSANAVSICQACGLTEINRLERSRRYLLYVKGSLLDSQINEFASMVHDRMTECIYVEKLTSFKTSIVPEEVRYIPVMEKGRKALEEINEEMGLAFDEQDLQYYTKLFRDDIKRNPTNVELFDIAQSNSEHSRHWFFTGKLVIDGQPVDKTLMQIVKSTLLANPNNSVIGF…	30	119	24	3.359	0.0216606	429	5	3	8	'6.1.1.4'	'Nucleotide metabolism.purines.ribonucleotide (RN) anabolism.formylglycinamidine RN synthase *(PUR4)'	'mercator4v5.0: formylglycinamidine RN synthase *(PUR4) & swissprot: Probable phosphoribosylformylglycinamidine synthase, chloroplastic/mitochondrial & original description: Phosphoribosylformylglycinamidine synthase (AHRD V1 **** A9Y5J1_ARATH); contains Interpro domain(s) IPR010073 Phosphoribosylformylglycinamidine synthase, eukaryotes and proteobacteria'	-	1	-	none	Cp	Cp	73.99	plastid stroma; mitochondria	mitochondrion,plastid	plp_at_00144; plp_at_02503	-	0.01	0	No	Detected by both ITAG and Atlas
Solyc02g076950	UPF0052 domain protein (AHRD V1 **-- A1CBK9_ASPCL); contains Interpro domain(s) IPR002882 LPPG:FO 2-phospho-L-lactate transferase CofD/UPF0052	-	At2g34090	XP_025885160.1	MADGYLGPSPLLKPSSLYTFPFTFSPFSGSPRSLSFSFMASNCSSARHCSCSSTSSSTTHQPSILVFSGGTAFNGVVEELKNLTTRVAHVLPVSDDGGSTAEIVRVLGGPAVGDIRSRCLRLSGQSTSEARAVRILLGHRLPLDARRAKSEWYEIVEGSHELWQDVSKPYRETIRAFLAYFQDQILRRSDEHFCFSNGSIGNFFFAGARIFFQSLDAAIFLFSRVSEIPAESFVLPVISTNERLTLGCELSAIHNISFQLVISA	1	1	1	0.334	0.00215381	1050	1	0	1	'35.2'	'not assigned.not annotated'	'mercator4v5.0: not classified & original description: UPF0052 domain protein (AHRD V1 **-- A1CBK9_ASPCL); contains Interpro domain(s) IPR002882 LPPG:FO 2-phospho-L-lactate transferase CofD/UPF0052'	Cp	2	Cp	Cp	Cp	Cp	99.8	-	-	-	Cp	0.69	0	No	Detected by both ITAG and Atlas
Solyc02g077280	GTP-binding protein era homolog (AHRD V1 ***- D0MDG4_RHOM4); contains Interpro domain(s) IPR005662 GTP-binding protein Era	ERA-like	At5g66470	XP_004232950.1	MRALCLNVSLFTATLPKNNTPLIHSYCNCFSTSFPGDNGRFGQRVTTTRRRNSKSEIFLGDEEEVQAGENEKFSSIAEETSRAMRLRRSKGVVDTEEEEEEDDSSMLLSLSVKPDRNMALLDDYEMEELDFVPENPNHRSGYVAVLGKPNVGKSTLSNQMVGQKLSIVTDKPQTTRHRVLGICSGPDHQMILYDTPGVIEKKMHKLDTMMMKNVRSAAVNADCVLVVVDACKVPAKIDEVLEEGVGDLKYKVPTLLVLNKKDLIKPGEIAKRLEWYEKFTDVDEVIPVSAKYGHGVEDVKDWILSKLPLGPAYYPKDIASEHPERFFVAEIVREKIFLQYRNEVPYACQVNVVSYKTRPNAKDFIQVEVIVERNTQKIILIGKEGKALKLLATAARLDI…	9	31	9	1.555	0.0100274	685	5	3	8	'35.1'	'not assigned.annotated'	'mercator4v5.0: not classified & swissprot: GTPase ERA-like, chloroplastic & original description: GTP-binding protein era homolog (AHRD V1 ***- D0MDG4_RHOM4); contains Interpro domain(s) IPR005662 GTP-binding protein Era'	Cp	5	Cp	none	Cp	C	99.6	plastid stroma	plastid	-	M	0.06	0	No	Detected by both ITAG and Atlas
Solyc02g077680	Phosphorylase (AHRD V1 **** B9H2Q8_POPTR); contains Interpro domain(s) IPR011833 Glycogen/starch/alpha-glucan phosphorylase	PHS2	At3g46970	XP_010316777.1	MAAIAVPLLAVRSPQANLQFPSIFNLNRPFSTSLFSNAFTHVKVSSTTSSSNQVVTETTCTSSSTISVQNDDALDTTLFVIRAKNRIGLLQIITRVFKVLGLKIEKAIIEFEGEFFVKKFYVNDSNGKKIEKVEYLEKIQKALLEAIDGDDGGAGVTAPSAVAVSGRGVVVRKPGLKMELGDRKAKVEKMFGLMDEFLKNDSISLQKDILDHVEFTVARSRFSFDDFEAYQALAHSVRDRLIERWHDTHQYFKKKDPKRIYFLSLEFLMGRSLTNSVTNLGIQDEYADALTQLGFDFEVLAEQEGDAALGNGGLARLAACQMDSLATLDYPAWGYGLRYQYGLFRQIIVDGFQHEQPDFWLNFGNPWEIERVHVSYPVKFYGTVEEEVLNGKKCKIWIP…	14	42	14	1.371	0.00884092	722	5	1	6	'3.2.3.5.2'	'Carbohydrate metabolism.starch metabolism.degradation.maltose metabolism.cytosolic alpha-glucan phosphorylase'	'mercator4v5.0: cytosolic alpha-glucan phosphorylase & swissprot: Alpha-glucan phosphorylase 2, cytosolic & original description: Phosphorylase (AHRD V1 **** B9H2Q8_POPTR); contains Interpro domain(s) IPR011833 Glycogen/starch/alpha-glucan phosphorylase'	Cp	1	Cp	Cp	Cp	Cp	93.9	-	cytosol	-	Cp	0.98	0.01	No	Detected by both ITAG and Atlas
Solyc02g077990	30S ribosomal protein S5 (AHRD V1 ***- B6TT32_MAIZE); contains Interpro domain(s) IPR005712 Ribosomal protein S5, bacterial-type	RPS5	At2g33800	XP_004232896.1	MAASSLSTFSSLSLRAPSRFSPFQSQPHHTFFIPKTIQSPFHLLLNPTKFDPIKPNSTTAETTFFDNTDPEEISTYDPPERPEDFIEPASFDDGPMESEEEIAKAYEELYGAAYSGETFLGNDIYAMDSKVKKTTSFGKTKKEKAKDGFDERVVQVRRVTKVVKGGKQLHFRAVVVVGDKKGQVGVGVGKAKEVIAAVQKSAVNARRNLITVPMTKYLTFPHRSEGDFGAARVMLRPAAPGTGVIAGGAVRIVLEMAGVENALGKQLGSNNALNNARATVVAVQQMRQFSEVAQERGIPMEELWK	12	66	12	9	0.0580367	169	5	3	8	'17.6.2.3.5'	'Protein biosynthesis.organelle machinery.plastidial ribosome biogenesis.small ribosomal subunit proteome.component *(uS5c)'	'mercator4v5.0: component *(uS5c) of small plastid ribosomal-subunit proteome & swissprot: 30S ribosomal protein S5, chloroplastic & original description: 30S ribosomal protein S5 (AHRD V1 ***- B6TT32_MAIZE); contains Interpro domain(s) IPR005712 Ribosomal protein S5, bacterial-type'	Cp	3	Cp	Cp	Cp	Cp	100	plastid ribosome	plastid	plp_at_00208; plp_at_01187; plp_at_01639; plp_at_02516	Cp	0.99	0.01	No	Detected by both ITAG and Atlas
Solyc02g078240	Probable 2-carboxy-D-arabinitol-1-phosphatase	-	At5g22620	XP_004232874.1	MMTSRVIFTIPYFSFPSISNKSPYPKLIPDTSAPICYAICCSTSTPGLPVTTEILRNDTPLTGGAFDFENATTSLTKRVLASPKKVTIVRHGLSSWNEESRVQGSSNLSILSEKGTMQAERCKMALSDIHFDQCFSSPISRAKTTAEIIWKGKEEPLVFLDSLKEAHLFFLEGMKNEDAKRIYPKEYTTWREDPSKFCVDGVYPLQKLWGRAHEAWEEILLTPGEHFLVVTHKSILRALICTALGLGPERFRSVDINNGGLCVFKFNKEGEAMLQSLNMTAHMYTDHVYHY	2	4	2	0.468	0.00301791	991	4	1	5	'35.1'	'not assigned.annotated'	'mercator4v5.0: not classified & swissprot: Probable 2-carboxy-D-arabinitol-1-phosphatase & original description: 2,3-bisphosphoglycerate-dependent phosphoglycerate mutase (AHRD V1 ***- GPMA_CYTH3); contains Interpro domain(s) IPR013078 Phosphoglycerate mutase'	-	5	Cp	ER	Cp	C	81.5	plastid stroma	plastid	-	Cp	0.64	0.08	No	Detected by both ITAG and Atlas
Solyc02g079210	MORF1 (MULTIPLE ORGANELLAR RNA EDITING FACTOR 1)	MORF1	At4g20020	XP_004232793.1	MALYTSRLRRALPLSSSIFAQTFHQPNLISPIASLSQCTSTQSNLSKLNRFDFPSQWRLFRSSTISLSSRSRSFDRNPADDEIGPDTILFEGCDYEHWLIVIDFPKDTQLTREEMIETYVQTAAKVFGSVEEAKKKIYALSTTTYRGFQVLCSEDTSKKFEGLPGVVFVLPDSYIDPVNKEYGGDKYNNGEIIERPPPPQFQRQGSRPRRGPQYQQGNYRPPQQNYGPAQGHPPQQNYGAAQGPPPQQNYNAPQGPPPQQNYGPPRYPPPQQNYGSRQYAPPPQQNYRQPQDLSPQQNYERPQNPQPNQSYGVPQSVPSQWNHGLQPKFVPQQIYGPQGAGDHRGPAPPDSNLDAWDNSQVGWGDSIRSPFPRRDQRGGAPPEQGGFGGVQHYGSQQGG…	1	2	1	0.179	0.00115428	1134	1	0	1	'16.6.2.2.1'	'RNA processing.organelle machinery.RNA modification.C-to-U RNA editing.RNA editing factor *(MORF)'	'mercator4v5.0: RNA editing factor *(MORF) & swissprot: DAG protein, chloroplastic & original description: DAG protein (AHRD V1 *-*- B6SJX7_MAIZE)'	Cp	5	Cp	M	Cp	M	99.2	-	-	-	M	0.08	0	No	Detected by both ITAG and Atlas
Solyc02g079250	3'(2') 5'-bisphosphate nucleotidase-like protein (AHRD V1 **** Q682R6_ARATH); contains Interpro domain(s) IPR000760 Inositol monophosphatase	-	At4g05090	XP_004232790.1	MDLLRYSASRYPAAHLQLPFRTPLRRRFVAVRSSLSLPFAEQKAKYYSELEAAVDVVERACRLCVDVKKSLFSSDGRILEKNDQTPVTIADFGVQALVSLEMNKLFPSIPLVAEEDSAFLRSNNLVGSVVDVVKDKATLGDEVTEDNILKAIDRGGKDAYVFAPEPATYWILDPIDGTRGFVRGSEALYVVGLALVVEGKIVLGVMGCPNWHEDCSDNSIIGVQENQSSRSGIIMVSHVGCGTWTKRLSDILSNESPHTWTRCSVDSCQMVQGARVTIPESQAWKSLPLSGLFDAKTDSENIGEGNILLLSACCGSLCKYLMVASGRASVYIQGKKATSIIKVWDHAVGIICVHEAGGKES	8	36	8	2.594	0.0167275	504	5	3	8	'35.1'	'not assigned.annotated'	'mercator4v5.0: not classified & swissprot: Putative PAP-specific phosphatase, mitochondrial & original description: 3&apos(2&apos) 5&apos-bisphosphate nucleotidase-like protein (AHRD V1 **** Q682R6_ARATH); contains Interpro domain(s) IPR000760 Inositol monophosphatase'	M	2	Cp	possibly M	Cp	M	100	-	plastid	-	-	0.23	0	No	Detected by both ITAG and Atlas
Solyc02g079730	Thioredoxin-like fold domain-containing protein MRL7, chloroplastic [Solanum lycopersicum, 0.0, 99.43%], manual annnotation	MRL7	At4g28590	XP_004232766.1	MVIHSALNLNFCAISSLSALKAGQHCSSCSFSNFLLPPPLKRLTCFATSKKSEEEHVSDPKNNSGSRSRKAIRSRESKVTHNEDKDSAKIFPSTIPKKPRRGRRSEAAAVEDFVRDSLEKTFASIREQNSDMMKDTENILKDRVDDDTESDESSDDEDDSSRDKKEKKMIIEEEDPNWPLDADVGWGIRASEYFDKHPIKNVIGEDGVEIDWEGEIDDCWVKEINCLEWESFAFHPSPLIVLVFERYNRASDNWKALKELEKAAKVYWSAKERLPPRTVKIDINIERDLAYALKVKESPQILFLRGNRILYREKEIRTADDLVQMIAYFYYNAKKPSCIDDAALSQQSYTSQIKKEAVEHGSIPV	1	1	1	0.155	0.00099952	1161	1	1	2	'15.6.1.2.4.3'	'RNA biosynthesis.organelle machinery.RNA polymerase activities.plastid-encoded RNA polymerase (PEP) complex.PEP assembly/activity regulation.regulatory factor *(NCP/RCB)'	'mercator4v5.0: regulatory factor *(NCP/RCB) of plastid-encoded RNA polymerase activity & swissprot: Thioredoxin-like fold domain-containing protein MRL7, chloroplastic & original description: Thioredoxin family protein (AHRD V1 ***- B6TC88_MAIZE)'	Cp	5	Cp	none	Cp	N	69.5	plastid nucleoid	plastid	-	Cp	0.66	0	No	Detected by both ITAG and Atlas
Solyc02g079770	MORF9 (MULTIPLE ORGANELLAR RNA EDITING FACTOR 9)	MORF9	At1g11430	XP_004232761.1	MAALKLPSFSKTLNPNSQFQNLPKTPTFLLSLSYPFLTTSLSSIPPSTSSRFPVVRAISDGEYSSKRSSNSDERETIMLPGCDYNHWLIVMEFPKDPAPTREQMIDTYLDTLATVLGSMEEAKKNMYAFSTTTYTGFQCTVSEETSEKFKGLPGVLWVLPDSYIDVKNKDYGGDKYINGEIIPCQYPTYQPKQANRTRSKSKAYVRRRDGPPPERTRRAAAPESSS	2	11	2	1.154	0.00744159	767	5	2	7	'16.6.2.2.1'	'RNA processing.organelle machinery.RNA modification.C-to-U RNA editing.RNA editing factor *(MORF)'	'mercator4v5.0: RNA editing factor *(MORF) & swissprot: Multiple organellar RNA editing factor 9, chloroplastic & original description: DAG protein (AHRD V1 ***- B6TYI4_MAIZE)'	Cp	1	Cp	Cp	Cp	Cp	99.6	plastid stroma	plastid	plp_at_00028; plp_at_01295; plp_at_02481	Cp	0.92	0.08	No	Detected by both ITAG and Atlas
Solyc02g079950	Oxygen-evolving enhancer protein 3 (AHRD V1 ***- Q7Y1T5_PEA); contains Interpro domain(s) IPR008797 Photosystem II oxygen evolving complex protein PsbQ	OEE3 PSBQ	At4g05180	NP_001234528.1	MAHAMASMGGLIGSSQTVLDGSLQLSGSARLSTVSTNRIALSRPGLTVRAQQGSVDIETSRRAMIGLVAAGLAGSVAKAAFAEARSIKVGPPPPPSGGLPGTLNSDEARDFSLPLKNRFYLQPLTPAEAAQRVKDSAKEIVSVKDFIDKKAWPYVQNDLRLRAEYLRYDLKTVISAMPKEQKGKLQDLSGKLFKTISDLDHAAKTKNSAEAQKYYAETVTTLNDVLANLG	18	199	18	99	0.638403	22	5	3	8	'1.1.1.2.2.3'	'Photosynthesis.photophosphorylation.photosystem II.PS-II complex.oxygen-evolving center (OEC) extrinsic components.component *(OEC16/PsbQ)'	'mercator4v5.0: component *(PsbQ) of PS-II oxygen-evolving center & swissprot: Oxygen-evolving enhancer protein 3, chloroplastic & original description: Oxygen-evolving enhancer protein 3 (AHRD V1 ***- Q7Y1T5_PEA); contains Interpro domain(s) IPR008797 Photosystem II oxygen evolving complex protein PsbQ'	Cp	2	Cp	Cp	Cp	Cp	100	thylakoid-peripheral-lumenal-side	plastid	plp_at_00391; plp_at_01234; plp_at_01670; plp_at_01844; plp_at_01943	Thylakoid	0.38	0.62	Yes	Detected by both ITAG and Atlas
Solyc02g080220	Pectinesterase (AHRD V1 ***- B9RXQ4_RICCO); contains Interpro domain(s) IPR000070 Pectinesterase, catalytic	PME	At1g11580	XP_010316615.1	MTTNYSSQPLLDSPKTKSSSSTKALYVLLSLAAIVGSVGFISIWAINRTSISLTTRVCDTAHDQPSCLAMLSEVAPAGLMDTKTVDLLQMVLHKSSLKIHETIHLASNVNGRINNGQEQVALEDCLELMDLSRDRLMDSMMGLGNLTAQAHFDVHSWLSSILTNHVTCIDGLNGQVRSIMEPMLNDLVARARTSLALMVAIAPQKNIVPTVSDGLPSWVSANDRRLLQLSANAIAANVVVAKDGSGKYKTVKEAVASAPDNSKTRYVIYVKKGIYKENVEIGKTKKNLMLVGDGMDATIITGNLNVIDGSTTFKSATVAAVGDGFIAQDIQFQNTAGPQKHQAVALRVGADQSVINRCKMDAFQDTLYTHTLRQFYRDCYITGTVDFIFGNAAVVFQNS…	2	5	0	0.233	0.0015025	1096	3	1	4	'21.3.1.2.1'	'Cell wall organisation.pectin.homogalacturonan.modification and degradation.pectin methylesterase'	'mercator4v5.0: pectin methylesterase & swissprot: Pectinesterase/pectinesterase inhibitor & original description: Pectinesterase (AHRD V1 ***- B9RXQ4_RICCO); contains Interpro domain(s) IPR000070 Pectinesterase, catalytic'	Cp	3	Cp	none	Cp	V	47.7	-	-	-	-	0.03	0	No	Detected by both ITAG and Atlas
Solyc02g080440	FeS assembly protein SufB (AHRD V1 ***- Q3MG36_AVT); contains Interpro domain(s) IPR010231 SUF system FeS cluster assembly, SufB	ABCI8 NAP1	At4g04770	XP_004232719.1	MASLLTNGISHFCPQSIAEQPKLPKGYNFLPNSPGPKISNPGNFKIKAADAKATVEVPGKESSLSISNEGDPLQKFLKRDYKWGFNENIESFALPKGLSEDTIRLISSRKNEPEWMLEYRLKSYEKFVKMKEPKWSDNQYPEIDFQNICYYSEPKKKPTLDSLDEADPELVRYFDKLGIPLNERNRLANVAVDAVLDSVSIATTHRKTLEKSGVIFCSISEAIREYPDLVRKYLFRVVPPEDNFYAALNSAVFSDGSFVYIPKNTKCPMQISTYFRINAMETGQFERTLIVADEGSFVEYLEGCTAPSYDTNQLHAAVVELYCHEGAEIKYSTVQNWYAGDEEGRGGIYNFVTKRGICAGARSKISWTQVETGSAITWKYPSVVLEGDESVGEFYSVAL…	6	12	4	0.701	0.00452041	904	4	0	4	'7.12.1.1.1.1'	'Coenzyme metabolism.iron-sulfur cluster assembly machinery.plastidial SUF system.assembly phase.SUF-BCD scaffold complex.component *(SUF-B)'	'mercator4v5.0: component *(SUF-B) of plastidial SUF system assembly phase & swissprot: UPF0051 protein ABCI8, chloroplastic & original description: FeS assembly protein SufB (AHRD V1 ***- Q3MG36_ANAVT); contains Interpro domain(s) IPR010231 SUF system FeS cluster assembly, SufB'	Cp	5	-	possibly Cp	not Cp	Cp	65.6	plastid	plastid	-	Cp	0.99	0	No	Atlas only
Solyc02g080540	ATP synthase gamma chain (AHRD V1 ***- B7FIR4_MEDTR); contains Interpro domain(s) IPR000131 ATPase, F1 complex, gamma subunit	ATPC	At4g04640	XP_004232711.1	MSCSNLTMLVSSKPSLSESSALSFRSAVSSFQLPNHNLSGPSNPSRSSSVIPVRCGLRDLRDRIDSVKNTQKITEAMKLVAAAKVRRAQEAVVGARPFSETLVEVLYNINEQLQTDDIDVPLTKVRPVKKVALVVVTGDRGLCGGFNNYIIKKAEARIRDLKALGLDYTIISVGKKGNSYFLRRPYIPVDKFLEGSNLPTAKDAQAIADDVFSFFVSEEVDKVELLYTKFVSLVKSEPVIHTLLPLSPKGEICDINGNCVDAAEDEFFRLTTKEGKLTVERDVMRTKTTDFSAILQFEQDPVQILDALLPLYLNSQILRALQESLASELASRMSAMSSATDNASELKKNLSRVYNRQRQAKITGEILEIVAGADALV	12	165	12	38.811	0.250273	45	5	3	8	'1.1.9.2.3'	'Photosynthesis.photophosphorylation.ATP synthase complex.peripheral CF1 subcomplex.subunit gamma'	'mercator4v5.0: subunit gamma of peripheral CF1 subcomplex of ATP synthase complex & swissprot: ATP synthase gamma chain, chloroplastic & original description: ATP synthase gamma chain (AHRD V1 ***- B7FIR4_MEDTR); contains Interpro domain(s) IPR000131 ATPase, F1 complex, gamma subunit'	Cp	1	Cp	Cp	Cp	Cp	98.8	thylakoid-peripheral-stromal-side	plastid	-	Cp	1	0	No	Detected by both ITAG and Atlas
Solyc02g080570	Starch synthase 3, Glycogen synthase (AHRD V1 *-** D4ZXV2_SPIPL); contains Interpro domain(s) IPR011835 Glycogen/starch synthases, ADP-glucose type	SS3	At1g11720	NP_001234623.1	MDVPLPLHRPLSCTSVSNAITHLKIKPFLGFVSHGTTSLSVQSSSWRRDVMVTGVPFPFCANFSGRRRRKVSTPRSQQSSPKGFVPRKPSGMSTQRKVQKSNGDKESQSTSTSKESEISNQKTVEAKVETSDDDTKGVVRDHKFLEDEDEINGSTKSISMSPGRGSSQFVESEEIGDDDNDAVKLNESKRLEESDFLIDSVIREQSGSQGETNDSSKGSHAVGTKFYEILQVDVEPQQLKEINAGSVEYTGPVASKLLEITKASDVQHTESNEIDYLDSNSFFKSDLVEEDDPLTAGTVETGDSSLNLRLEIEANLRRQAIERLAEENLLQGIRLFCFPEVVKPDEDVEIFLNRGLSTLKNEPDVLIMGAFNEWRYRSFTTRLTETHLNGDWWSCTIHV…	25	84	25	4.012	0.0258715	372	5	3	8	'3.2.2.4.3'	'Carbohydrate metabolism.starch metabolism.biosynthesis.starch synthase activities.starch synthase *(SS3)'	'mercator4v5.0: starch synthase *(SS3) & swissprot: Soluble starch synthase 3, chloroplastic/amyloplastic & original description: Glycogen synthase (AHRD V1 *-** D4ZXV2_SPIPL); contains Interpro domain(s) IPR011835 Glycogen/starch synthases, ADP-glucose type'	Cp	4	Cp	Cp	Cp	Cp	79.3	plastid stroma	plastid	-	-	0.05	0	No	Detected by both ITAG and Atlas
Solyc02g080620	Prephete dehydratase family protein (AHRD V1 **** D7KMI7_ARALY); contains Interpro domain(s) IPR001086 Prephete dehydratase	ADT1	At1g11790	XP_004232706.1	MALKLVPIWACCTNQQHCCTYPQSLKLGYGSRLSGSSFLNLRAHKKWECLVLLSETERAITPVEDEQPLAPPGDASVQEAQIIQSKGFHRDLQSLPKPLSATYLSSGQHDGSNVRVAYQGIPGAYSEAAALKAYPKCETVPCDQFEAAFKAVELWLVDKAVLPIENSVAGSIHRNYDLLLRHRLHIVGEVQLLVNHCLLGLPGIRKEELKRVVSHPQALEQCNIMLNELGVARLSSDDTSSAAQIVASEGKRDTGAVASARAAEIYGLSILAERIQDDPDNITRFLILAREPIISGTDRPYKTSIVFTLEEGPGVLFKALAVFALREINLTKIESRPQKKRPLRVVDDSNKGSAKYFDYLFYIDFEASMADPRAQYALEHLQEFARFIRVLGCYPMDKNL	3	7	2	0.245	0.00157989	1091	2	0	2	'4.5.2.4'	'Amino acid metabolism.shikimate group amino acid biosynthesis.phenylalanine and tyrosine.arogenate dehydratase *(ADT)'	'mercator4v5.0: arogenate dehydratase *(ADT) & swissprot: Arogenate dehydratase/prephenate dehydratase 1, chloroplastic & original description: Prephenate dehydratase family protein (AHRD V1 **** D7KMI7_ARALY); contains Interpro domain(s) IPR001086 Prephenate dehydratase'	M	3	-	Cp	Cp	Cp	90.6	plastid stroma	plastid	-	Cp	0.52	0.07	No	ITAG only
Solyc02g080640	Phosphoadenosine phosphosulfate reductase (AHRD V1 *-** B7I7M3_ACIB5); contains Interpro domain(s) IPR013766 Thioredoxin domain	APR3	At4g21990	NP_001233829.1	MALTFTSSSAIHGSLSSSSSSYEQPKVSQLGTFQPLDRPQLLSSTVLNSRRRSAVKPLYAEPKRNDSIVPSAATIVAPEVGESVEAEDFEKLAKELQNASPLEVMDKALEKFGDDIAIAFSGAEDVALIEYAHLTGRPYRVFSLDTGRLNPETYQLFDTVEKHYGIRIEYMFPDSVEVQALVRTKGLFSFYEDGHQECCRVRKVRPLRRALKGLRAWITGQRKDQSPGTRSEIPIVQVDPSFEGLDGGAGSLVKWNPVANVDGKDIWNFLRAMNVPVNSLHSQGYVSIGCEPCTRPVLPGQHEREGRWWWEDAKAKECGLHKGNIKDETVNGAAQTNGTATVADIFDTKDIVTLSKPGVENLVKLEDRREPWLVVLYAPWCQFCQAMEGSYVELAEKLA…	1	3	0	0.155	0.00099952	1162	3	0	3	'25.2.2.1'	'Nutrient uptake.sulfur assimilation.sulfate assimilation.(phospho)adenosine phosphosulfate reductase *(APR)'	'mercator4v5.0: (phospho)adenosine phosphosulfate reductase *(APR) & swissprot: 5'-adenylylsulfate reductase 3, chloroplastic & original description: Phosphoadenosine phosphosulfate reductase (AHRD V1 *-** B7I7M3_ACIB5); contains Interpro domain(s) IPR013766 Thioredoxin domain'	Cp	1	Cp	Cp	Cp	Cp	100	plastid	plastid	-	Cp	0.98	0	No	ITAG only
Solyc02g080780	orotidine 5'-phosphate decarboxylase	-	At1g62250	XP_004232700.1	MLGLQNPQAISSCQSFLDTSVLHELIPCKSKNVNPSISNLSSATLVRSPAKGVSSCSFSWNWPNQLKTYKLSQQSASYRLLCRSQDATSPENEYRSSRNIAISLFRRYKNFLERGGGDNLKEFISAGVNAYALGCTDEGLRKELFSLKESGVEIEAMETYGGSTSLKSKILSVEVDECIMWLSIIFITILCTPQPTIVRWSSTSPVSDEMIVQWKGFCAIIANAYFVRGMAWLPVKTLQLEQMAVAGHAEEPSVVASRMRLVFTTLEVVSPQWPRG	1	1	1	0.212	0.00136709	1111	1	2	3	'35.2'	'not assigned.not annotated'	'mercator4v5.0: not classified & original description: Unknown Protein (AHRD V1)'	Cp	4	Cp	possibly Cp	Cp	Cp	40.1	-	-	-	-	0.33	0.01	No	Detected by both ITAG and Atlas
Solyc02g080980	Leucyl-tRNA synthetase IPR002302 Leucyl-tRNA synthetase, class Ia, bacterial_mitochondrial	LeuRS1	At4g04350	XP_004232688.2	MYDLHVEQKESTSILVDNQAAIAISNNPVFHKKTKHFNIKFYFLREVQQRGEVTLVYTKTLPISKFELLRQKIGVCSIQSKEECKESVLNRSKFNFTVLYDIDAVSTKEPFKCVINQGIILGEVQYTACKDDEGNLISADSVDELAEYKQERIPEEKVMKSGDLFVLKDNPNIRLIARAHKMSKSRGNVINPDDVVLEYGADSLRLYEMFMGPLRDSKTWNTSGIDGVHRFLARSWRLVVGSASPTGSYLDGTVTVDEKPSIEQLRSLHRCIDKVTEEIEGTRFNTGISAMMEFINAAYKWDKLPRSIIEAFVLLLSPYAPHMAEELWSRLGHSNSLAYEPFPKADTAYLKESTVVLPVQINGKTRGTIQVEETCTEEEAFRLASFDTKLSKFLDGKSI…	7	25	7	1.818	0.0117234	633	5	3	8	'35.1'	'not assigned.annotated'	'mercator4v5.0: not classified & swissprot: Leucine--tRNA ligase, chloroplastic/mitochondrial & original description: Leucyl-tRNA synthetase (AHRD V1 ***- D0MFP2_RHOM4); contains Interpro domain(s) IPR002302 Leucyl-tRNA synthetase, class Ia, bacterial/mitochondrial'	-	1	-	none	Cp	C	62.8	plastid stroma	plastid	plp_at_00389	-	0	0	No	Detected by both ITAG and Atlas
Solyc02g080990	Leucyl-tRNA synthetase IPR002302 Leucyl-tRNA synthetase, class Ia, bacterial_mitochondrial	LeuRS2	At4g04350	XP_010316571.2	MGEKGLWQQMDSWINGAGLHVGHPLGYTATDILARFKRMQGFNVLHPMGWDAFGLPAEQYAIDTGTHPKITTLRNISRFRSQLKSLGFSYDWDREISTTEPDYYKWTQWIFLQLLKRGLAYQAEVPVNWCPALGTVLANEEVIDGVSERGGHPVIRKPMRQWMLRITAYADRLLEDLDDLDWPESIKEMQRNWIGRSEGAELDFVVINGNSQEEEKRITVYTTRPDTIFGATYLVLAPEHPFLSSLVSEAQSKHVEEYREHAFRKSDLERTELQKEKTGVFTGCYAKNPANGQAVPIWVADYVLGSYGTGAIMAVPAHDTRDFEFAMKYTIPISWVVRPDDSNCGNFEKPYSGEGSMINSSYSESGLDINGLPSKEAASRVVQWLEKSGNGKKKVNYKL…	6	15	6	2.162	0.0139417	566	5	2	7	'17.2.12'	'Protein biosynthesis.aminoacyl-tRNA synthetase activities.leucine-tRNA ligase'	'mercator4v5.0: leucine-tRNA ligase & swissprot: Leucine--tRNA ligase, chloroplastic/mitochondrial & original description: Leucyl-tRNA synthetase (AHRD V1 **** C6IZI6_9BACL); contains Interpro domain(s) IPR002302 Leucyl-tRNA synthetase, class Ia, bacterial/mitochondrial'	-	3	-	none	Cp	M	62.64	plastid stroma	plastid	plp_at_00389	-	0	0	No	Detected by both ITAG and Atlas
Solyc02g081000	Leucyl-tRNA synthetase (AHRD V1 *-*- D5H7P2_SALRM); contains Interpro domain(s) IPR002302 Leucyl-tRNA synthetase, class Ia, bacterial/mitochondrial	LeuRS3	At4g04350	XP_010316571.2	MNSGPNSLNRVSPAKPKPKHMLTLSKLLLINKLPPSNCQTTATSSLPFSPIAMPIQLHTSTRLHHLPSHLLPRPPLLRSALLLPACRRPLLRREFCNHERFGVSNCTKSSSKNTVTVLVNAIDGQKINEKHEKVKRAYPFHEIEPKWQHYWEENKTFRTPDEIDTSKPKFYVLDMFPYPRYGLFYSHSFNFKLLCAKDGLWSIFF	2	3	2	0.359	0.00231502	1039	2	0	2	'35.1'	'not assigned.annotated'	'mercator4v5.0: not classified & swissprot: Leucine--tRNA ligase, chloroplastic/mitochondrial & original description: Leucyl-tRNA synthetase (AHRD V1 *-*- D5H7P2_SALRM); contains Interpro domain(s) IPR002302 Leucyl-tRNA synthetase, class Ia, bacterial/mitochondrial'	Cp	5	Cp	none	Cp	Cp	33.7	plastid stroma	plastid	plp_at_00389	-	0.18	0.01	No	Detected by both ITAG and Atlas
Solyc02g081170	Plastid-lipid-associated protein, chloroplastic (AHRD V1 **-- PAP_CITUN); contains Interpro domain(s) IPR006843 PAP fibrillin	CHRC FBN1	At4g04020	NP_001234183.1 Laizet et al (2004)	MASISSLNQIPCRTLQITSQYSKPTSKISTLPISSTNFPSKTELHRAISVKEFTYPKPKFTAQATNYDKEDEWGPEVEKISPGGVAVVDEEPPKEPSEIELLKKQLADSFYGTNRGLSASSETRAEIVELITQLESKNPNPAPTEALTLLNGKWILAYTSFSGLFPLLSRGNLLLVRVEEISQTIDSESFTVQNSVVFAGPLATTSISTNAKFEVRSPKRVQIKFEEGIIGTPQLTDSIVLPENVEFLGQKIDLSPFKGLITSVQDTASSVAKSISSQPPIKFPISNNNAQSWLLTTYLDDELRISRGDAGSVFVLIKEGSPLLKP	11	100	11	4.456	0.0287346	349	5	3	8	'5.9.1'	'Lipid metabolism.plastoglobule-associated activities.Fibrillin plastoglobule core protein *(FBN1/2)'	'mercator4v5.0: Fibrillin plastoglobule core protein *(FBN1/2) & swissprot: Light-induced protein, chloroplastic & original description: Plastid-lipid-associated protein, chloroplastic (AHRD V1 **-- PAP_CITUN); contains Interpro domain(s) IPR006843 PAP fibrillin'	Cp	2	Cp	Cp	Cp	Cp	100	plastoglobules	plastid	plp_at_00388; plp_at_01232; plp_at_01668; plp_at_01842; plp_at_01942; plp_at_02543	Cp	0.99	0	No	Detected by both ITAG and Atlas
Solyc02g081910	DNA topoisomerase IPR005733 DNA topoisomerase I, bacterial-type	-	At4g31210	XP_010316521.1	MALVQQLLTTASTSCRSIMLQNRTLHNYQANCLQCSTFATVDSFEKMSRKARICCGIRARQPRNLRVVSQQKIHPLRSYYTNEPGSSSAFSVLQLSKEGFPSTPMPIIFSFRPFGGIGSRSYNTDGKMHFSRDARAIADKGSGGAKVFSDGNKTFFKNLKNHSERSNELAVHRRNALSDKVTEKGTPNSKVSASKNVDLVISKDTPVKTDEKDVNLDISGIPLGNNGKPTSTGSEKTKKQSRSKKDKNVSSATVDQPKASKTRRAKKPSPAKDEESPAVSEISSPVHSSSVGPADNVSMKVDLAQVKRTSPRKRKPTKVSNSVAELNGATVVPSDSKLVTDKSSDVSSKSKPPGQKKWPKLYPPTAKSVLVVESVTKARVIQGYLGDMFEVLPSYGHVR…	1	1	1	0.038	0.000245044	1246	1	0	1	'13.1.6.4'	'Cell division.DNA replication.organelle machinery.type-Ia DNA topoisomerase'	'mercator4v5.0: type-Ia DNA topoisomerase & swissprot: DNA topoisomerase 3-alpha & original description: DNA topoisomerase (AHRD V1 **** B9SPT5_RICCO); contains Interpro domain(s) IPR005733 DNA topoisomerase I, bacterial-type'	M	5	Cp	Cp	Cp	N	95.6	plastid nucleoid	plastid	-	Cp	0.44	0.05	No	Detected by both ITAG and Atlas
Solyc02g081920	Plastid transcriptionally active 14	pTAC14 (PAP7)	At4g20130	XP_004232623.1	MVSSTILIQQPTNFFHQPELHHQLWRGLQHGCVASLQKQPILVCNSNKRNRPLRVSSSANGAVTSSTLEAYDSSPSPSAFPLFTPPSQPQDTPASQLELADPDFYKIGYVRSFRAYGIEFREGPDGYGVFASKDVEPLRRARVIMEIPLELMLTISKKLPWMFFPDIIPVGHPVFDIINSTNPETDSDLRLACLLLYAFDCKDNFWQLYGDFLPSADECTSFLLATEEDLLELQDEKLASTMREQQNRALEFWEKNWHSAVPLKIKRLAQDPERFIWAMSIAQSRCISMQTRIGSLVQEANMLVPYADMMNHSFQPNCFFHWRFKDRMLEVMINAGQKIRKGDEMTVNYMAGQKNDLFMQRYGFSSPVNPWDVIHFTGDAKIHLDTFLSVFNISGLPGE…	5	5	5	0.688	0.00443658	911	1	0	1	'15.6.1.2.2.7'	'RNA biosynthesis.organelle machinery.RNA polymerase activities.plastid-encoded RNA polymerase (PEP) complex.essential co-factor components.lysine N-methyltransferase component *(PAP7/TAC14)'	'mercator4v5.0: cofactor of plastid-encoded RNA polymerase *(PAP7/TAC14) & swissprot: Protein PLASTID TRANSCRIPTIONALLY ACTIVE 14 & original description: Plastid ribulose-1 5 bisphosphate carboxylase/oxygenase large subunit N-methyltransferase-related protein (Fragment) (AHRD V1 *-*- A7KWL3_ARALP); contains Interpro domain(s) IPR001214 SET'	-	5	Cp	possibly Cp	Cp	N	95.5	plastid nucleoid	plastid	plp_at_00423	Cp	0.96	0	No	Detected by both ITAG and Atlas
Solyc02g082200	Glutaredoxin (AHRD V1 ***- A9LC71_PTEVI); contains Interpro domain(s) IPR004480 Glutaredoxin-related protein	GRX4	At3g54900	NP_001310489.1	MSLGISLQWQLPSVIRSTTTSAAQRTTDVFLSFPTVHSGRALQSSAIPSSSIATGKRDGRLRSLRCLSALDPNLKSTLDKVVTSQKIVLFMKGTKEFPQCGFSNTVVQILKALNAPFETLNILENEALRQGLKEYSSWPTFPQLYIDGEFFGGCDIVVEAYKSGELQELLERTLCS	2	10	2	1.154	0.00744159	768	5	3	8	'7.12.1.1.3'	'Coenzyme metabolism.iron-sulfur cluster assembly machinery.plastidial SUF system.assembly phase.glutaredoxin maturation factor *(GRXS14)'	'mercator4v5.0: glutaredoxin maturation factor *(GRXS14) & swissprot: Monothiol glutaredoxin-S7, chloroplastic & original description: Glutaredoxin (AHRD V1 ***- A9LC71_PTEVI); contains Interpro domain(s) IPR004480 Glutaredoxin-related protein'	Cp	2	Cp	Cp	Cp	Cp	75.3	plastid	plastid	-	Cp	0.88	0.01	No	Detected by both ITAG and Atlas
Solyc02g082830	Phosphoserine aminotransferase (AHRD V1 **** B9H657_POPTR); contains Interpro domain(s) IPR003248 Phosphoserine aminotransferase	PSAT	At4g35630	XP_004232556.1	MAMSAATTQSFLLNNKTTRHNYQTLKSATHIATFPSTTTLTSTYKSMSISCSAAASTTTTPLQTPPTTSSDRVFNFAAGPATLPENVLQKAQADLVNWRGSGMSVMEMSHRGKEFLSIIQKAESDLRTLLNISDEYAVLFLQGGATTQFAAIPLNICSPDDAVDYIVTGSWGDKAFKEAAKYSKPNVIWSGKSEKYTKIPNFDSLVQNPDAKYLHICANETIHGVEFKDYPTPLNEKTILVADMSSNFCSKPVDVSKFGIIYAGAQKNVGPSGVTIVIIRKDLIGNAQESTPVMLDYKIHAENNSLYNTPPCYGIYMCGLVFEDLLDQGGLVEVEKKNQKKAQILYDAIDSSNGFYRCPVDKSVRSLMNVPFTLAKPELEAEFVKTAAGEKMVQLKGHR…	11	75	10	5.158	0.0332615	316	5	3	8	'4.4.1.2'	'Amino acid metabolism.serine group amino acid biosynthesis.non-photorespiratory serine.phosphoserine aminotransferase'	'mercator4v5.0: phosphoserine aminotransferase & swissprot: Phosphoserine aminotransferase 1, chloroplastic & original description: Phosphoserine aminotransferase (AHRD V1 **** B9H657_POPTR); contains Interpro domain(s) IPR003248 Phosphoserine aminotransferase'	Cp	3	Cp	Cp	Cp	Cp	93.1	plastid stroma	plastid	-	Cp	0.98	0.01	No	Detected by both ITAG and Atlas
Solyc02g083270	Thiol-disulfide oxidoreductase LTO1; Vitamin K epoxide reductase (AHRD V1 **-- B4AXQ4_9CHRO); contains Interpro domain(s) IPR012932	VKOR LTO1	At4g35760	NM_001311344.1	MASIIGVSSSPFPTQTSHLLPSRSNSISSLVQLKRDSVRRLLLLRVNCSSRQVGDAETESESKVVLPDTPADTGISAYNWCAALGGIGFLETSYLTFLKLTNSAAFCPVGDGASCGDILNSSYSAVFGVPLPLIGMVAYGVVAILGIQLGQKSRPLGTGEANGRLVLLGTTTSMAAASAYFLYILSTKFTGEFCPYCLASVLLSFSLFISSMKGLGFQEVQKDVGIQLLIVLLVVSTLNNSYSDSQPTNTGSALAEMEYFTAEITSESTPFAISLAKHLHSIGAKMYGAFWCSHCQEQKQMFGREAAKLLDYVECFPYGLKRGISMINACQEAKLEGFPTWVINGEVLSGEKKLSELAALSGFDMKEELTEAK	3	5	3	1.154	0.00744159	769	2	0	2	'1.1.1.3.16'	'Photosynthesis.photophosphorylation.photosystem II.assembly.assembly factor *(LTO1)'	'mercator4v5.0: protein involved in PS-II assembly *(LTO1) & swissprot: Thiol-disulfide oxidoreductase LTO1 & original description: Vitamin K epoxide reductase (AHRD V1 **-- B4AXQ4_9CHRO); contains Interpro domain(s) IPR012932 Vitamin K epoxide reductase'	Cp	1	Cp	Cp	Cp	Cp	99.9	thylakoid-integral	plastid	-	Cp	0.92	0.06	No but associated with lumenal proteins	Detected by both ITAG and Atlas
Solyc02g083280	Senescence associated gene 1; Thiosulfate sulfurtransferase/rhodanese-like domain-containing protein 1 (AHRD V1 *--* TSTD1_HUMAN); contains Interpro domain(s) IPR001763 Rhodanese-like	SAG1	At4g35770	XP_004232533.1	MRTISLHSTSFSLVEFHGTKNLAQSRINRSVSLIPMARSQFQPKIRRDIGTSNRNPSFSWMATVGEKVHNSTVPTSVPVRVALELLQAGHRYLDVRTTEEYNDGHAAGAINIPYMLRIGSGMIKNPNFLEEVLEQFGKDDEIIVGCQLGKRSFMAATELLAAGFTGVTDIAGGYAAWTESGLPIES	3	49	3	1.848	0.0119169	626	5	3	8	'35.1'	'not assigned.annotated'	'mercator4v5.0: not classified & swissprot: Rhodanese-like domain-containing protein 15, chloroplastic & original description: Thiosulfate sulfurtransferase/rhodanese-like domain-containing protein 1 (AHRD V1 *--* TSTD1_HUMAN); contains Interpro domain(s) IPR001763 Rhodanese-like'	Cp	3	Cp	Cp	Cp	C	97.8	plastid	plastid	-	Cp	0.56	0	No	Detected by both ITAG and Atlas
Solyc02g083410	15-cis-phytoene desaturase (PDS) - Currently this gene is misannotated and is a fusion ofPBL22 and PDS	PDS	At3g09580	XP_004232522.1	MPPCLCLPATLPHPSSTLFSTRRRFPLLKPPYASSNIPVGSTSQPNTTGVIVIGGGLAGLAAAIRLQADNIPFLLLEASDAVGGRVRSDVVDGYTLDRGFQIFITGYPEARKVLDYDSLDLRKFYSGAQVYYGGRFHTVADPLRHFADALQSLTNPIGSVVDKLLIGLTRLKVLTQGDDEILSADEEPTMNLLKKIGFSDAILERFFRPFFGGIFFDRELETTSRLFNFIFKCLALGDNTLPAKGIAAIPEQLAAKLPSNSILFNTRVVSVDSGSDSSTKIRVTLQNGEMLESEFGVILAVEEPEAVKLLAGEKTGEVRQPVRSTVCLYFSADQGKVPVQDPVLLLNGSGKGIVNNMFFATNVAPSYAPAGKALVSVTLVGLYGDVADEDLVDRVVKEL…	16	82	16	2.621	0.0169016	503	5	3	8	'50.2.7'	'Enzyme classification.EC_2 transferases.EC_2.7 transferase transferring phosphorus-containing group'	'mercator4v5.0: EC_2.7 transferase transferring phosphorus-containing group & swissprot: Receptor-like protein kinase THESEUS 1 & original description: Receptor-like kinase (AHRD V1 *-*- A7VM40_MARPO); contains Interpro domain(s) IPR002290 Serine/threonine protein kinase'	Cp	3	Cp	Cp	Cp	Cp	52.1	plastid	plastid	plp_at_00260; plp_at_01061	Cp	0.74	0.05	No	Detected by both ITAG and Atlas
Solyc02g083500	Adenine nucleotide alpha hydrolase family protein (from NCBI); Genomic DNA chromosome 5 TAC clone K2A18 (AHRD V1 ***- Q9FKX3_ARATH); contains Interpro domain(s) IPR006016 UspA	AANH-like	At5g66090	XP_004232513.1	MAFAHCFLTVPADTTNFHTATSILTRPFSSSVSSSFSSSNLKTCSLSNFHKNLRIGLKVSVKAQASEDSAAADAFTNFKHVLLPITDRNPYLSEGSRQAAATAAAMAKKYGADITVVVIDEKGKEAYPEHETQLASIRWHLAEGGYQEFKLLERLGEGSKPTAIIGEIADDMNLDMVVMSMEAIHSKHVDANLLAEFIPCPVLLLPL	9	97	9	132.352	0.853474	17	5	3	8	'35.2'	'not assigned.not annotated'	'mercator4v5.0: not classified & original description: Genomic DNA chromosome 5 TAC clone K2A18 (AHRD V1 ***- Q9FKX3_ARATH); contains Interpro domain(s) IPR006016 UspA'	Cp	2	Cp	Cp	Cp	Cp	89.4	plastid stroma	plastid	plp_at_02472	Cp	0.97	0.01	No	Detected by both ITAG and Atlas
Solyc02g083590	Dehydroquite synthase (AHRD V1 ***- Q8RU74_SOLLC); contains Interpro domain(s) IPR016037 3-dehydroquite synthase AroB, subgroup	DHQS	At5g66120	NP_001233863.1	MASSFCPKQALSFTNSTHQLHQSRAIPRDIHVRFPAPVSSPSSRCGLKSKATTRLKVLATSATKVMDHSSSKASSQAPTVVEVDLGTRSYPIYIGAGLLDQPDLLQRHIHGKRVLVVTNTTVAPLYLDKTISALTDGNPNVTVESVILPDGEQFKNMETLMKVFDKAIESRLDRRCTFVALGGGVIGDMCGYAAASYLRGVNFIQIPTTVMAQVDSSVGGKTGINHPLGKNMIGAFYQPQCVLIDTDTLNTLPDRELASGLAEVIKYGLIRDAEFFEWQEQNMPLLLARDPTAFTYAIKRSCENKADVVSQDEKESGVRATLNLGHTFGHAVETGVGYGQWLHGEAVAAGTVMAVDMSRRLGWIDDSLVQRVQKILQQAKLPTSPPETMTVEMFKSIMA…	12	48	12	4.275	0.0275674	356	5	3	8	'4.5.1.2'	'Amino acid metabolism.shikimate group amino acid biosynthesis.shikimate pathway.3-dehydroquinate synthase *(DHQS)'	'mercator4v5.0: 3-dehydroquinate synthase *(DHQS) & swissprot: 3-dehydroquinate synthase, chloroplastic & original description: Dehydroquinate synthase (AHRD V1 ***- Q8RU74_SOLLC); contains Interpro domain(s) IPR016037 3-dehydroquinate synthase AroB, subgroup'	Cp	2	Cp	Cp	Cp	Cp	100	stroma	peroxisome	-	Cp	1	0	No	Detected by both ITAG and Atlas
Solyc02g083810	ferredoxin--NADP reductase (AHRD V1 ***- D7MN04_ARALY); contains Interpro domain(s) IPR012146 ferredoxin--NADP reductase	PETH1 LFNR	At1g20020	XP_004232495.1	MATAVSAAVSLPSSKSTSFSSRNSIISTDKINFNKVPLYYRNVSGASRLVSIRAQVTTEAPAKVEKISKKQEEGVIVNKFRPKEPYVGRCLLNTKITGDDAPGETWHMVFSTEGEVPYREGQSIGVIADGVDANGKPHKLRLYSIASSALGDFGDSKTHMFPCVSRGLCTPMTKGKKLKEFAQTSYVYPFYFSDLKPGAEVKITGPVGKEMLMPKDPNATVIMLATGTGIAPFRSFLWKMFFEKHEDYKFNGTAWLFLGVPTSSSLLYKEEFEKMKEKAPENFRLDFAVSREQTNEKGEKMYIQTRMAQYAEELWTLLQKDNTFIYMCGLKGMEQGIDEIMSSLAERDGIVWADYKKQLKKAEQWNVEVY	20	395	11	42.652	0.275042	41	5	3	8	'1.1.5.2.1'	'Photosynthesis.photophosphorylation.linear electron flow.ferredoxin-NADP reductase (FNR) activity.ferredoxin-NADP oxidoreductase'	'mercator4v5.0: ferredoxin-NADP oxidoreductase & swissprot: Ferredoxin--NADP reductase, leaf-type isozyme, chloroplastic & original description: Ferredoxin--NADP reductase (AHRD V1 ***- D7MN04_ARALY); contains Interpro domain(s) IPR012146 Ferredoxin--NADP reductase'	Cp	1	Cp	Cp	Cp	Cp	100	thylakoid-peripheral-stromal-side	plastid	plp_at_00052; plp_at_01150; plp_at_01713; plp_at_02392	Cp	1	0	No	Detected by both ITAG and Atlas
Solyc02g084440	Fructose-bisphosphate aldolase (AHRD V1 ***- Q9SXX4_NICPA); contains Interpro domain(s) IPR000741 Fructose-bisphosphate aldolase, class-I	FBA3	At2g21330	NP_001294934.1 Cai et al (2016)	MASASLLKTSPVLDKTEFVKGQSLRLPSVSVRCQPSALTVRASSYADELVKTAKTIASPGRGILAMDESNATCGKRLASIGMENTEANRQAFRTLLVSVPGLGEYISGAILFEETLYQSTVEGKKMVDVLVEQNIVPGIKVDKGLVPLAGSNNESWCQGLDGLASRSAAYYQQGARFAKWRTVVSIPNGPSALAVKEAAWGLARYAAISQDNGLVPIVEPEILLDGEHNIDRTFEVAKQVWAEVFFYLAQNNVMFEGILLKPSMVTPGAECKDRATPQQVADYTLSLLRQRIPPAVPGIMFLSGGQSEVEATLNLNAMNQSPNPWHVSFSYARALQNTCLKTWSGRPENVKAAQDALLVRAKANSLAQLGKYTGEGESDEAKKGMFVKGYVY	19	316	10	41.813	0.269632	42	5	3	8	'1.2.5'	'Photosynthesis.calvin cycle.fructose 1,6-bisphosphate aldolase'	'mercator4v5.0: fructose 1,6-bisphosphate aldolase & swissprot: Fructose-bisphosphate aldolase 2, chloroplastic & original description: Fructose-bisphosphate aldolase (AHRD V1 ***- Q9SXX4_NICPA); contains Interpro domain(s) IPR000741 Fructose-bisphosphate aldolase, class-I'	Cp	3	Cp	Cp	Cp	Cp	77.5	plastid stroma	plastid	plp_at_00184; plp_at_01372; plp_at_01926; plp_at_02366	Cp	0.99	0	No	ITAG only
Solyc02g084750	CDK5RAP1-like protein	CDK5RAP1	At4g36390	XP_004232445.1	MASSLSSLSTMLSQPHCAVRIKFPKQYSVRFLSSKLLEVQSTSSRRTSVSLGRSSTFSIKISRNFSQCHSRTSLTSKNQIPTLRDFIPKATQTVSSSDVQQESVMISDVMPRGRIYHETYGCQMNVNDMEIVLSIMKNAGYTESVEVPENAEIIFINTCAIRDNAELKVWQRLNYFWFLKRQWKSNVASGRSQSAHPPKVVVLGCMAERLKDKILDADKMVDVVCGPDAYRDLPRLLEEVDYGQKGINTLLSLEETYADINPVRISKNSISAFVSVMRGCNNMCSFCIVPFTRGRERSRPVESIVKEVAELWKEGVKEVTLLGQNVNSYNDTSGVENPDEPAVSWELSDGFSSMFKVKHVGLRFADLLDRLAIEFPEMRFRYTSPHPKDFPDDLLYVMR…	1	1	1	0.07	0.000451396	1231	1	0	1	'35.1'	'not assigned.annotated'	'mercator4v5.0: not classified & swissprot: CDK5RAP1-like protein & original description: (Dimethylallyl)adenosine tRNA methylthiotransferase miaB (AHRD V1 ***- MIAB_SALRD); contains Interpro domain(s) IPR006463 tRNA-i(6)A37 modification enzyme MiaB'	Cp	1	Cp	Cp	Cp	Cp	88.3	plastid	plastid	-	Cp	0.98	0.02	No	Detected by both ITAG and Atlas
Solyc02g085100	Putative glucose-6-phosphate 1-epimerase	-	At5g66530	XP_004232421.1	MAALSMTWSCSPLTSSKFRRVNRYSGMAFASVKSTEGLGNLPKVVLTSPHGSEAELYLFGACVTSWKVDSKDLLFVRPDAVFNGQKPISGGIPHCFPQFGPGPIQQHGFGRNMNWSLVSSESVKEKPVVTVELRDGPYSRAMWDYSFHALYKITLDKKTLSTELTVKNTDNKPFSFTTALHTYFSASVTGASVNGLKGCKTLNKVPDPTNPVEGKEERDVVTFPGFVDCVYLDAPNELHLDNGLGDKISIKNTNWSDAVLWNPHLTMEQSYKDFVCVENAKIGTVQLEPEQSWTAVQHLTVA	7	86	7	18.953	0.122219	86	5	3	8	'35.1'	'not assigned.annotated'	'mercator4v5.0: not classified & swissprot: Putative glucose-6-phosphate 1-epimerase & original description: Aldose 1-epimerase family protein (AHRD V1 **** D7MMG0_ARALY); contains Interpro domain(s) IPR014718 Glycoside hydrolase-type carbohydrate-binding, subgroup'	Cp	4	Cp	Cp	Cp	Cp	94	plastid stroma	plastid	plp_at_02577	Cp	0.73	0.16	No	Detected by both ITAG and Atlas
Solyc02g085290	Maf-like protein expressed IPR003697 Maf-like protein	-	At5g66550	XP_004232406.1	MAPKNLSFKIILGSSSMARRKILADMGYEFTVMGADIDEKSIRKDNAEELVIALAEAKADAIMSRLKTTDQLDENTHSTLLITADTVAVYEGIVREKPSSKEEARQFIKSYSGGQATVVGSVVVTNLTKGIRKGAWERSEVYFHDIPDEIIDSLIEEGIILNVAGGLMLEHPLTLPFVDTLIGTADSVMGLPRNLTEKLIEEAL	4	33	4	13.678	0.0882028	117	5	3	8	'35.2'	'not assigned.not annotated'	'mercator4v5.0: not classified & original description: Maf-like protein expressed (AHRD V1 ***- Q2R2T0_ORYSJ); contains Interpro domain(s) IPR003697 Maf-like protein'	S	5	-	possibly M	Cp	C	78.9	plastid	plastid	-	-	0	0	No	Detected by both ITAG and Atlas
Solyc02g085520	Adenylosuccinate synthetase, chloroplastic (AHRD V1 **** PURA_SOLBU); contains Interpro domain(s) IPR001114 Adenylosuccinate synthetase	PURA	At3g57610	AAG01122.1	MNISTLRLDSNPITTATATHRNGILGCNGTYSYRFNQFQQRKKTASIVVCSTKPLASVVDHQGVNESGLRRIESLSQVSGVLGCQWGDEGKGKLVDILAKHFDIVARCQGGANAGHTIYNSEGKKFALHLVPSGILNEETLCVIGNGVVVHLPGLFKEIDGLEANGVSCQGRILVSDRAHLLFDFHQEIDGLREAELAKSFIGTTKRGIGPCYSSKVIRNGLRVSDLRHMDTFPQKLDLLLSDAAARFPGFKYGPDMLREEVERYKKFAERLEPFVTDTVHFMNDAISQKKKILVEGGQATMLDIDFGTYPFVTSSSPSAGGICTGLGIAPKVVGDLVGVVKAYTTRVGSGPFPTEIMGKGGDLLRFAGQEFGTTTGRPRRCGWLDIVALKFCCQINGF…	15	82	10	3.084	0.0198872	453	5	3	8	'6.1.1.10'	'Nucleotide metabolism.purines.ribonucleotide (RN) anabolism.adenylosuccinate synthetase *(PUR11)'	'mercator4v5.0: adenylosuccinate synthetase *(PUR11) & swissprot: Adenylosuccinate synthetase, chloroplastic & original description: Adenylosuccinate synthetase, chloroplastic (AHRD V1 **** PURA_SOLBU); contains Interpro domain(s) IPR001114 Adenylosuccinate synthetase'	-	5	Cp	none	Cp	C	100	plastid stroma	plastid	plp_at_00356; plp_at_02596	Cp	0.83	0	No	Detected by both ITAG and Atlas
Solyc02g085700	Geranylgeranyl pyrophosphate synthase 2 (AHRD V1 ***- Q1A7S9_SOLLC); contains Interpro domain(s) IPR000092 Polyprenyl synthetase	GGPPS-2	At4g36810	NP_001234302.2	MSLSTTITTWGYTHHPFSDVGNKGRSRFRSPGFMPHLKMKFFTNPSSLSVSALLTKEQESKSKKQAMEFKEYVLEKAVSVNKALESAVSIKEPVMIHESMRYSLLAGGKRIRPMLCIAACELVGGVESTAMPAACAVEMIHTMSLIHDDLPCMDNDDLRRGKPTNHKIYGEDVAVLAGDALLALAFEHIATHTKGVSSDRIVRVIGELAKCIGAEGLVAGQVVDIISEGISDVDLKHLEFIHLHKTAALLEGSVVLGAILGGAPDEDVEKLRKFARCIGLLFQVVDDILDVTKSSQQLGKTAGKDLVADKVTYPKLIGIEKSREFAEELNKEAKAQLVGFDQEKAAPLFALANYIAYREN	9	50	8	3.833	0.0247172	389	5	3	8	'9.1.3.1.1'	'Secondary metabolism.terpenoids.isoprenyl diphosphate biosynthesis.geranyl diphosphate synthase complex.catalytic component *(LSU/IDS11)'	'mercator4v5.0: catalytic component *(IDS11) of geranyl diphosphate synthase complex & swissprot: Geranylgeranyl pyrophosphate synthase, chloroplastic & original description: Geranylgeranyl pyrophosphate synthase (AHRD V1 ***- D0FZ25_9ASTE); contains Interpro domain(s) IPR000092 Polyprenyl synthetase'	Cp	5	Cp	possibly Cp	Cp	Cp	98.6	plastid stroma	plastid	-	Cp	0.96	0.03	No	Detected by both ITAG and Atlas
Solyc02g085730	Allene oxide cyclase (AHRD V1 **** Q9LEG5_SOLLC); contains Interpro domain(s) IPR009410 Allene oxide cyclase	AOC	At1g13280	NP_001234019.1	MATVSSASAALRTISSSSSKLSSAFQTKKIQSFKLPNPLISQNHKLTTTSTTASRSFSCKSQSTSTDSTNTEVQELSVYEINERDRGSPAYLRLSQKTVNSLGDLVPFSNKLYTADLKKRIGITAGLCILIKHEEEKKGDRYEAVYSFYFGDYGHIAVQGAYLTYEETYLAVTGGSGIFAGVSGQVKLQQLIFPFKLFYTFYLKGIPGLPSELLCTAVPPSPTVEPTPEAKACEEGAALKNYTN	3	23	3	1.154	0.00744159	770	5	3	8	'11.7.1.4'	'Phytohormone action.jasmonic acid.biosynthesis.allene oxidase cyclase *(AOC)'	'mercator4v5.0: allene oxidase cyclase *(AOC) & swissprot: Allene oxide cyclase, chloroplastic & original description: Allene oxide cyclase (AHRD V1 **** Q9LEG5_SOLLC); contains Interpro domain(s) IPR009410 Allene oxide cyclase'	Cp	1	Cp	Cp	Cp	Cp	99.2	plastid stroma	plastid	-	Cp	0.96	0	No	Detected by both ITAG and Atlas
Solyc02g085950	Ribulose bisphosphate carboxylase small chain (AHRD V1 ***- A9YTZ7_SOLTU); contains Interpro domain(s) IPR000894 Ribulose bisphosphate carboxylase, small chain	RBCS-3B	At5g38410	NP_001296139.1	MASSIVSSAAVATRGNGAQASMVAPFTGLKSTASFPVSRKQNLDITSIASNGGRVSCMQVWPPINMKKYETLSYLPDLSDEQLLSEIEYLLKNGWVPCLEFETEHGFVYRENHKSPGYYDGRYWTMWKLPMFGCTDATQVLAEVQEAKKAYPQAWVRIIGFDNVRQVQCISFIAYKPEGY	8	231	1	14.849	0.0957541	113	5	3	8	'1.2.1.1.2'	'Photosynthesis.calvin cycle.ribulose-1,5-bisphosphat carboxylase/oxygenase (RuBisCo) activity.RuBisCo heterodimer.small subunit'	'mercator4v5.0: small subunit of ribulose-1,5-bisphosphat carboxylase/oxygenase heterodimer & swissprot: Ribulose bisphosphate carboxylase small subunit, chloroplastic 4 & original description: Ribulose bisphosphate carboxylase small chain (AHRD V1 ***- A9YTZ7_SOLTU); contains Interpro domain(s) IPR000894 Ribulose bisphosphate carboxylase, small chain'	Cp	2	Cp	Cp	Cp	Cp	100	plastid stroma	plastid	plp_at_00545; plp_at_02355	Cp	0.99	0	No	Detected by both ITAG and Atlas
Solyc02g086080	Alpha/beta hydrolase fold (AHRD V1 ***- A1T9R4_MYCVP); contains Interpro domain(s) IPR000073 Alpha/beta hydrolase fold-1	-	At5g38360	XP_004232353.1	MATVCTLILPKFPQSRGVSTTRAVLKRDPKMKVPYELKQEQSRLFHKLPSGLNMEVLYQRGSDQIRSTKNPPLVFVHGSFHAAWCWAEHWLPFFSQNGYDSYALSLLGQGESDSPAAAVAGTLETHAGDIADFIHKEIRLPPVLLGHSFGGLIVQYYIANIRREAVKGSDSEKKSLFPNLSGAVLVCSVPPSGNSGLVWRYLFSKPLAAFKVTRSLAAKAFQTSLPLCKETFFSAGMEDQLVARYQELMTESSRMPLFDLRKLNASLPVSRLEDPAFKVLVVGAKDDFIVDMEGLNETGRFYGIPTVCIEGVAHDIMIDCSWRKGAQLILSWLNSLN	4	11	4	0.778	0.00501695	871	5	2	7	'35.2'	'not assigned.not annotated'	'mercator4v5.0: not classified & original description: Alpha/beta hydrolase fold (AHRD V1 ***- A1T9R4_MYCVP); contains Interpro domain(s) IPR000073 Alpha/beta hydrolase fold-1'	Cp	5	-	possibly Cp	Cp	Cp	62.9	-	-	-	-	0.33	0.04	No	Detected by both ITAG and Atlas
Solyc02g086560	Sirohydrochlorin ferrochelatase B	SIRB	At1g50170	XP_004232317.1	MDSLSLQSHLSLRSSTSTYPARGPGIAVPEFVKLLKGPSKSRYLPQRYCMATSSREGLKGIEEGDGVIIVDHGSRRKESNLMLNGFVAMFRERTKYPIVEPAHMELAEPSIRDAFSLCVQQGARRVIVSPFFLSPGRHWNQDIPSLTAEAAKEHPGVPYVITAPLGLHELLVDVVNDRINHCLSHIAGKADECSVCAGTGKCQLRQ	2	9	2	0.778	0.00501695	872	4	3	7	'7.13.3.2'	'Coenzyme metabolism.tetrapyrrole biosynthesis.siroheme biosynthesis.sirohydrochlorin ferrochelatase'	'mercator4v5.0: sirohydrochlorin ferrochelatase & swissprot: Sirohydrochlorin ferrochelatase, chloroplastic & original description: Cobalamin (Vitamin B12) biosynthesis CbiX protein (AHRD V1 *--- A6C9M5_9PLAN); contains Interpro domain(s) IPR002762 Cobalamin (vitamin B12) biosynthesis CbiX'	Cp	5	Cp	possibly Cp	Cp	Cp	96.4	plastid	plastid	-	-	0.33	0	No	Detected by both ITAG and Atlas
Solyc02g086610	Isocitrate dehydrogenase-like protein (AHRD V1 **** Q8LPJ5_ARATH); contains Interpro domain(s) IPR004790 Isocitrate dehydrogenase DP-dependent, eukaryotic	ICDH	At1g65930	XP_004232313.1	MAGVASFVSSSSASASSIASKKFYFQVNSNRQLFNNRVSLTTRIPNASIRCFASTSGPTSKILVQNPIVEMDGDEMTRVIWKMIKDKLIYPYLELDTKYYDLGILNRDATDDQVTVESAEATLKYNVAVKCATITPDETRVKEFGLKSMWKSPNGTIRNILNGTVFREPILCTNIPRIVPGWKKPICIGRHAFGDQYRATDAIINGPGKLKMVFVPENGESPTELDVYDFKGPGIALAMYNVDQSIRAFAESSMSMAFSKKWPLYLSTKNTILKKYDGRFKDIFQEVYEEKWKQQFEEHSIWYEHRLIDDMVAYVLKSEGGYVWACKNYDGDVQSDLLAQGFGSLGLMTSVLLSSDGKTLEAEAAHGTVTRHFRLHQKGQETSTNSVASIFAWTRGLGH…	14	66	14	2.924	0.0188555	475	5	3	8	'50.1.1'	'Enzyme classification.EC_1 oxidoreductases.EC_1.1 oxidoreductase acting on CH-OH group of donor'	'mercator4v5.0: EC_1.1 oxidoreductase acting on CH-OH group of donor & swissprot: Isocitrate dehydrogenase [NADP], chloroplastic/mitochondrial & original description: Isocitrate dehydrogenase-like protein (AHRD V1 **** Q8LPJ5_ARATH); contains Interpro domain(s) IPR004790 Isocitrate dehydrogenase NADP-dependent, eukaryotic'	Cp	2	Cp	Cp	Cp	Cp	86.2	-	cytosol	-	Cp	0.95	0	No	Detected by both ITAG and Atlas
Solyc02g086680	Peptide deformylase 1B (AHRD V1 **** Q5VNP3_ORYSJ); contains Interpro domain(s) IPR000181 Formylmethionine deformylase	PDF1B	At5g14660	NP_001234441.1 Giglione et al (2000)	MAMAAASWASSSSFTRFLRPLLSRNSSPSPISYSLHRYKSANCLFFSASSNKPPKLAVYAQARRVLSSKTKGDEIATPADLSFVVPLKIVEYPDPILRAKNKRIDNFDANLKKLVDEMFDIMYKTDGIGLSAPQVGMNVQLMVFNAAGERGEGEEIVLVNPRVSRYSRRIIPYEEGCLSFPMIHGDVKRPESVKVDAQDINGTRFEISLSALPARVFQHEFDHLQGVLFFDKMTDEVLDTIREKLVALEKKYEDRTGLPTPESINTRKIKKAAVGFGKS	5	9	5	0.968	0.00624217	822	5	2	7	'17.6.6.1'	'Protein biosynthesis.organelle machinery.peptide deformylation.formylmethionine deformylase *(PDF)'	'mercator4v5.0: formylmethionine deformylase *(PDF) & swissprot: Peptide deformylase 1B, chloroplastic & original description: Peptide deformylase-like (AHRD V1 **** Q5VNP3_ORYSJ); contains Interpro domain(s) IPR000181 Formylmethionine deformylase'	Cp	3	Cp	Cp	Cp	Cp	99.2	plastid stroma; mitochondria	plastid	-	Cp	0.95	0	No	Detected by both ITAG and Atlas
Solyc02g086730	50S ribosomal protein L12-C (AHRD V1 ***- Q8LBJ7_ARATH); contains Interpro domain(s) IPR015608 Ribosomal protein L12, chloroplast	RPL12-C	At3g27840	XP_010316288.1	MASTLSTITLRSPSPISPATASSTHASISFPTKTLELPIRTPKLYHRRATLVRPLAAVEAPEKVVQLGDEISNLTLADAQKLVEYLQDKLGVSAASFAPAAVVASPGGAAADAPAVVEEKTEFDVVIDEVPSNARIATIKAVRALTSLALKEAKELIEGLPKKFKEGVSKDEAEDAKKQLEEAGAKVSIA	11	83	1	62.096	0.400427	29	4	3	7	'17.6.2.2.10'	'Protein biosynthesis.organelle machinery.plastidial ribosome biogenesis.large ribosomal subunit proteome.component *(bL12c)'	'mercator4v5.0: component *(bL12c) of large plastid ribosomal-subunit proteome & swissprot: 50S ribosomal protein L12, chloroplastic & original description: 50S ribosomal protein L12-C (AHRD V1 ***- Q8LBJ7_ARATH); contains Interpro domain(s) IPR015608 Ribosomal protein L12, chloroplast'	Cp	1	Cp	Cp	Cp	Cp	99.6	plastid	plastid	-	Cp	1	0	No	Detected by both ITAG and Atlas
Solyc02g086740	50S ribosomal protein L12-A (AHRD V1 ***- Q8LBJ7_ARATH); contains Interpro domain(s) IPR015608 Ribosomal protein L12, chloroplast	RPL12-A	At3g27850	XP_004232303.1	MASTLSTIALCSPSHISPSTHASISFPTKTLQLPIRTSKLHHRRATFVRPLAAVEAPEKVVQLGDEISTLTLADAQKLVEYLQDKLGVSAASFAPAAVVAAPGGAAADAPAVVEEKTEFDVVIDEVPSNARIATIKAVRALTSLALKEAKELIEGLPKKFKEGVSKDEAEDAKKQLEEAGAKVSIA	11	87	1	99	0.638403	23	4	3	7	'17.6.2.2.10'	'Protein biosynthesis.organelle machinery.plastidial ribosome biogenesis.large ribosomal subunit proteome.component *(bL12c)'	'mercator4v5.0: component *(bL12c) of large plastid ribosomal-subunit proteome & swissprot: 50S ribosomal protein L12, chloroplastic & original description: 50S ribosomal protein L12-C (AHRD V1 ***- Q8LBJ7_ARATH); contains Interpro domain(s) IPR015608 Ribosomal protein L12, chloroplast'	Cp	1	Cp	Cp	Cp	Cp	99.8	plastid ribosome	plastid	plp_at_00307; plp_at_01213; plp_at_01655; plp_at_01815	Cp	1	0	No	ITAG only
Solyc02g086820	Carbonic anhydrase (AHRD V1 ***- Q5NE20_SOLLC); contains Interpro domain(s) IPR015892 Carbonic anhydrase, prokaryotic-like, conserved site	CA1	At3g01500	NP_001234048.1	MSTASINNCLTLSPAQASLKKPTRPVAFARLGNSSSSSSIPSLIRNEPVFAAPTPIINPIVREEMAKESYDQAIAALEKLLSEKAELGPVAAARVDQITAELKSADGGKAFDPVEHMKAGFIHFKTEKYDTNPALYGELAKGQSPKFMVFACSDSRVCPSHVLNFQPGEAFMVRNIANMVPAYDKVRYSGVGAAIEYAVLHLKVENIVVIGHSACGGIKGLMSLPEDGSESTAFIEDWVKICLPAKAKVLADHGGKEFAHQCTACEKEAVNVSLGNLLTYPFVREGLVKKTLALKGGYYDFVKGGFELWGLEFGLSPPLSV	18	434	18	49.119	0.316745	37	5	3	8	'1.4.1.2'	'Photosynthesis.CAM/C4 photosynthesis.carbon dioxide-bicarbonate equilibrium.beta-type carbonic anhydrase'	'mercator4v5.0: beta-type carbonic anhydrase & swissprot: Carbonic anhydrase, chloroplastic & original description: Carbonic anhydrase (AHRD V1 ***- Q5NE20_SOLLC); contains Interpro domain(s) IPR015892 Carbonic anhydrase, prokaryotic-like, conserved site'	Cp	1	Cp	Cp	Cp	Cp	100	plastid stroma	plastid	plp_at_00245; plp_at_01058; plp_at_01413; plp_at_01649; plp_at_01791; plp_at_02605	Cp	0.99	0	No	Detected by both ITAG and Atlas
Solyc02g086830	Protease Do-like (S2 serine-type protease) (AHRD V1 **** Q7UQ70_RHOBA); contains Interpro domain(s) IPR001254 Peptidase S1 and S6, chymotrypsin/Hap	DEG1	At3g27925	XP_004232295.1	MAASSHSLASSACFSTTPARKFSGSDRFQLAKSLLCRKIPGFSGSVVCARRICSNYASSGDQSNYGKKLMDSIFVACTSVALSFSLYIADVDPASAFVVTSPRKLQTDELATVRLFQENTPSVVYITNLASRQDMFTLDVFEVPQGSGSGFVWDKNGNIVTNYHVIRGASDLRVTLADQTTYDAKVVGFDQDKDVAVLHIDAPKDKLRPIPIGVSADLLVGQKVFAIGNPFGLDHTLTTGVISGLRREINSAATGRPIQDVIQTDAAINPGNSGGPLLDSSGNLIGINTAIYSPSGASSGVGFSIPVDTVSGIVDQLVQFGKVTRPILGIKFAPDQSVEQLGVTGVLVLDAPPNGPAGKAGLLPTKRDSYGRLILGDIITSINGKKVSNGTDLYRILDQ…	13	137	13	11.915	0.0768341	135	5	3	8	'19.4.2.3'	'Protein homeostasis.proteolysis.serine-type peptidase activities.DEG-type protease'	'mercator4v5.0: protease *(Deg) & swissprot: Protease Do-like 1, chloroplastic & original description: Protease Do-like (S2 serine-type protease) (AHRD V1 **** Q7UQ70_RHOBA); contains Interpro domain(s) IPR001254 Peptidase S1 and S6, chymotrypsin/Hap'	Cp	2	Cp	Cp	Cp	Cp	99.9	thylakoid-peripheral-lumenal-side	plastid	-	Thylakoid	0.14	0.86	Yes	Detected by both ITAG and Atlas
Solyc02g086880	FNADH1-Formate dehydrogenase IPR006140 NAD-isomer specific 2-hydroxyacid dehydrogenase, NADNA-binding	FNADH1	At5g14780	NP_001234857.1	MAMRRVASTAARAIASPSSLVFTRELQASPGPKKIVGVFYKANEYAEMNPNFLGCAENALGIREWLESKGHQYIVTPDKEGPDCELEKHIPDLHVLISTPFHPAYVTAERIKKAKNLQLLLTAGIGSDHVDLKAAAAAGLTVAEVTGSNTVSVAEDELMRILILVRNFLPGHHQVINGEWNVAAIAHRAYDLEGKTVGTVGAGRIGRLLLQRLKPFNCNLLYHDRLKMDSELENQIGAKFEEDLDKMLSKCDIVVINTPLTEKTKGMFDKERIAKLKKGVLIVNNARGAIMDTQAVVDACNSGHIAGYSGDVWYPQPAPKDHLWRYMPNQAMTPHISGTTIDAQLRYAAGTKDMLDRYFKGEDFPAENYIVKDGELAPQYR	5	20	5	1.069	0.00689347	800	5	3	8	'50.1.16'	'Enzyme classification.EC_1 oxidoreductases.EC_1.17 oxidoreductase acting on CH or CH2 group'	'mercator4v5.0: EC_1.17 oxidoreductase acting on CH or CH2 group & swissprot: Formate dehydrogenase, mitochondrial & original description: Formate dehydrogenase (AHRD V1 **** Q5NE18_SOLLC); contains Interpro domain(s) IPR006140 D-isomer specific 2-hydroxyacid dehydrogenase, NAD-binding'	M	3	-	M	Cp	M	99.12	-	mitochondrion	-	M	0	0	No	Detected by both ITAG and Atlas
Solyc02g086890	Photosystem I assembly factor 3	PSA3	At3g55250	XP_004232292.1	MVVVSSLHSPSSSSSIYCNSISPSLRYFRRFYTFPSRRNNSNSNGGAVLLVKAYMDETTNPISSFANKVIGSLPVFGLIARIVNEEGGVGGDFIDFAEFRRRVGNKCSINDSRAFYEFRDRRGKTGDPLYVLLCCWLAAVGAGLLKSEEILEGVARLSLANDIEFEEQNFIAMMNEAREKRSKLGAPAPTIPMEFRAEKALEAIHVCCYGRDLIDEEDEKLLSTMLNAVFPTVGRQKVEIIVKEKAKRMADGTEEIKYEPKQLSKEAVQMQMKDLEFLKQNSLNQ	5	29	5	1.738	0.0112075	645	5	3	8	'1.1.4.3.8'	'Photosynthesis.photophosphorylation.photosystem I.assembly and maintenance.assembly factor *(PSA3)'	'mercator4v5.0: assembly factor PSA3 involved in PS-I assembly & swissprot: Photosystem I assembly factor PSA3, chloroplastic & original description: Calcium homeostasis regulator chor1 (Fragment) (AHRD V1 *-*- A6N1L7_ORYSI)'	Cp	2	Cp	Cp	Cp	Cp	96.2	thylakoid-peripheral-stromal-side	plastid	-	Cp	0.89	0.05	No	Detected by both ITAG and Atlas
Solyc02g086910	Peptidyl-prolyl cis-trans isomerase cyclophilin-type (AHRD V1 ***- A8IRU6_CHLRE); contains Interpro domain(s) IPR002130 Peptidyl-prolyl cis-trans isomerase, cyclophilin-type	CYP38	At3g01480	XP_004232290.1	MAASVSCHYFSSPLTTSTKSIKPKLNYSHFAPALSKGSIRHFVPLCSSQRSLPSESECQDKEKDWFLSLKKCAAAVALSVSLISGLPGSQWLGPAHASTPALPDVSVLISGPPIKDPGALLRYALPIDNKAIREVQKPLEDITDSLKIAGVKALDSVERNTRQASRALKEGKTLIISGVAKSKTDHAIELLNKLEAGLGELQQIVEDRTRDAVAPKQKELLNYVGGVEEDMVDGFPYEVPEEYQNMPLLKGRATVDMKVKVKDNPNLEECVFRIVLDGYNAPVTAGNFIDLVERHFYDGMDIQRADGFVVQTGDPEGPAEGFIDPSTEKTRTVPLEIMVVGEKAPFYGETLEDLGLYKAQTRLPFNAFGTMAMAREEFENNSASSQVFWLLKESELTPS…	13	194	13	19.691	0.126978	82	5	3	8	'1.1.1.4.8'	'Photosynthesis.photophosphorylation.photosystem II.repair and reassembly cycle.assembly factor *(CYP38)'	'mercator4v5.0: protein involved in PS-II assembly *(CYP38) & swissprot: Peptidyl-prolyl cis-trans isomerase CYP38, chloroplastic & original description: Peptidyl-prolyl cis-trans isomerase cyclophilin-type (AHRD V1 ***- A8IRU6_CHLRE); contains Interpro domain(s) IPR002130 Peptidyl-prolyl cis-trans isomerase, cyclophilin-type'	Cp	3	Cp	Cp	Cp	Cp	98.9	thylakoid-peripheral-lumenal-side	plastid	plp_at_00244; plp_at_01648; plp_at_01790; plp_at_01931; plp_at_02415	Thylakoid	0.15	0.85	Yes	ITAG only
Solyc02g087150	Uncharacterized protein	-	At5g14910	XP_004232276.1	MATVSAFSVCRAKSHSRIPHSSSNAIPQLFPMQFLRCQSNRSIGGGYSCSSSSVKAKVPLRTTRICSATEEDGATAVAEEESAAPTTSDQTVSVSVSPSDVLTMFFQAEGTMNEAAIPSVTNSLEDIEGITGLKIQVVEGIASVELTKQTTIQATGVASSLVETIQGSGFKLQTLNLSFQDEEDIS	1	15	1	2.162	0.0139417	567	5	3	8	'17.6.2.4.3'	'Protein biosynthesis.organelle machinery.plastidial ribosome biogenesis.plastidial ribosome-associated proteins.ribosome biogenesis factor *(CRASS)'	'mercator4v5.0: ribosome biogenesis factor *(CRASS) & original description: Heavy-metal-associated domain-containing protein (AHRD V1 *-*- D7M6P1_ARALY); contains Interpro domain(s) IPR006121 Heavy metal transport/detoxification protein'	Cp	3	Cp	possibly Cp	Cp	Cp	89	plastid stroma	plastid	plp_at_00513; plp_at_01255; plp_at_02560	Cp	0.98	0	No	Detected by both ITAG and Atlas
Solyc02g087230	Ferredoxin-thioredoxin reductase catalytic chain (AHRD V1 ***- B6TNR7_MAIZE); contains Interpro domain(s) IPR004209 Ferredoxin thioredoxin reductase, beta subunit	FRTB	At2g04700	XP_004232269.1	MRTLQASTSYSVGFGISSFATRPKPSSTHRCLTVAKMEPSEKSVEIMRKFSEQYARRSETYFCMDKGVTSVVIKGLAEHKDTLGAPLCPCRHYDDKAAEAQQGFWNCPCVPMRERKECHCMLFLTPDNDFAGEEQTITMEEIKETTANM	1	4	1	0.585	0.00377238	944	4	3	7	'10.3.1.2.2'	'Redox homeostasis.thiol-based redox regulation.thioredoxin reductase activities.ferredoxin-dependent thioredoxin reductase (FTR) complex.subunit beta'	'mercator4v5.0: subunit beta of ferredoxin-dependent thioredoxin reductase (FTR) complex & swissprot: Ferredoxin-thioredoxin reductase catalytic chain, chloroplastic & original description: Ferredoxin-thioredoxin reductase catalytic chain (AHRD V1 ***- B6TNR7_MAIZE); contains Interpro domain(s) IPR004209 Ferredoxin thioredoxin reductase, beta subunit'	Cp	3	Cp	possibly M	Cp	Cp	100	plastid stroma	plastid	-	Cp	0.68	0	No	Detected by both ITAG and Atlas
Solyc02g087250	Group II intron splicing factor CRS1-like IPR001890 RNA-binding, CRM domain	CFM2	At3g01370	XP_004232267.1	MNIINRAASIFLLLVFFLAFFKDSVHGRPLLLSMSRPKPDDAALFARWLVSQNYWGVLNTIASDMGGAPFGNVVSFSDGLPDKGRGIPYFYLTTLDPTARNALKDQRSSFTISEYAIGTCGKKDPENPSCAKITLVGKLKVVAGDPKETSFAQTALFTKHPEMEGWPKSHDFQIYKLEIEEIFMINWFGGPKPLTVDQYLQAKMIASSSSTPMLLPFCNFHPINPSKTLLKPSPSHSLFSSTPSLSPKPFFPRDSLPVFAASPDTEALPESAIRRIADKLRSLGFVEQPKNQETQENALSSNPTANSPGQIFVPLPTQLPKYRVGHTLDTSWSTPENPVPQPGLGKSIQKFHELRDEFLKEKDKERLKNKEYKKERAPSLAELTLPAEELRRLRTVGIA…	1	16	1	0.04	0.000257941	1244	5	3	8	'16.6.1.1.1.3'	'RNA processing.organelle machinery.pre-RNA splicing.plastidial RNA splicing.CFM-type splicing factor families.splicing factor *(CFM2)'	'mercator4v5.0: plastidial RNA splicing factor *(CFM2) & swissprot: CRM-domain containing factor CFM2, chloroplastic & original description: Group II intron splicing factor CRS1-like (AHRD V1 *--- Q5JK63_ORYSJ); contains Interpro domain(s) IPR001890 RNA-binding, CRM domain'	S	1	-	ER	Cp	Cp	93.32	plastid stroma	-	-	ER	0	0	No	Detected by both ITAG and Atlas
Solyc02g087400	Signal recognition particle 43 kDa protein	SRP43	At2g47450	XP_010316268.1	MDALFVNSSLSRLKLKFSSQFPTFSPLPHHSYLPLKKLNLPLVFATLQNQHQQQSAAEEVAQEEFEDYDADETYGEVNKIIGSRAIEGGKGMEYLIEWKDEHAPTWVPSNFIAQDVVAEYETPWWNAAKKSDESALRELIEAEDDRDVDAVDDDGRTALLFVSGLGSEPCVKLLAEAGADVNYRDRSGGLTALHMAAGYVKPGVAKLLIELGADPEVQDYRGQTPLSLARMVLNQTPKGNPMQFARRLGLENVIRVLEDAIFEYAQVEEILEKRGKGENVEYLVKWKDGEDNEWVKAWLISEDLVRDFEAGLEYAEAECILEKREGDNGKGEYLVKWTDIEEATWEPEENVDPLLIEDFEKGQQKVVS	11	61	11	5.31	0.0342416	306	5	3	8	'23.1.7.3.1'	'Protein translocation.chloroplast.thylakoid membrane SRP insertion system.SRP43-SRP54 transit complex.component *(cpSRP43)'	'mercator4v5.0: component *(cpSRP43) of thylakoid membrane SRP insertion system & swissprot: Signal recognition particle 43 kDa protein, chloroplastic & original description: Ankyrin repeat domain containing protein (AHRD V1 *--- B2WQ30_PYRTR); contains Interpro domain(s) IPR002110 Ankyrin'	M	5	Cp	none	Cp	C	94.8	plastid stroma	plastid	-	Cp	0.49	0.08	No	Detected by both ITAG and Atlas
Solyc02g088000	Starch Synthase 2, Glycogen synthase (AHRD V1 **** D5MJP6_9BACT); contains Interpro domain(s) IPR011835 Glycogen/starch synthases, ADP-glucose type	SS2	At3g01180	XP_004232219.1	MENSIVLHTGNQFHPSLPFFSFRPKKLSRIHGSSREQMWRIKRVKATGENSGEAASADESDDALQVTIEKSKKVLAMQQDLLQQIAERRKVVSSIKSSLADATGTYDGGSGSLSDVDIPDVDKDYNVTVPSTAATPITDVDKNTPPAISQDFVESKREVKRDLADERAPPLSRSSITASSQTSSTVSSKRILNVPPETPKFSQETLLNVNSRKSLVDVPGKKIQSYMPSLCKESSAQSLVEKRNENLEGSSAEANEETEDLVNIDEKPPPLAGTNVMNIILVASECAPWSKTGGLGDVAGALPKALARRGHRVMVVAPRYDNYPEPQDSGVRKIYKVHGQDVEVTYFQAFIDGVDFVFIDSHMFRHIGNNIYGGNRVDILKRMVLFCKAAIEVPWHVPC…	11	56	11	1.913	0.012336	616	5	3	8	'3.2.2.4.2'	'Carbohydrate metabolism.starch metabolism.biosynthesis.starch synthase activities.starch synthase *(SS2)'	'mercator4v5.0: starch synthase *(SS2) & swissprot: Granule-bound starch synthase 2, chloroplastic/amyloplastic & original description: Glycogen synthase (AHRD V1 **** D5MJP6_9BACT); contains Interpro domain(s) IPR011835 Glycogen/starch synthases, ADP-glucose type'	Cp	4	Cp	possibly Cp	Cp	Cp	99.7	stroma	plastid	-	Cp	0.67	0	No	Detected by both ITAG and Atlas
Solyc02g088350	BIOGENESIS FACTOR REQUIRED FOR ATP SYNTHASE 1	BFA1	At3g29185	XP_004230904.1	MATAPAIFVPSTSLASSNARKINLSSWNEKLVIPQNFPFWTPKYQSRKPPSCSGTNVTVVQGDRNTTELPMSIDALDSFIRLNLGNWTGSFHQFDGHGNLMHRITTKLAVGSYGEGELMSLLQTLYIKQPPSTTSCSGDDCESEWFEYKIKETNMFTVDKYQQIGFFPKEKAYALRYQTAGMLETVLRQGVLGEDDIGEESPRNLKLPSKRPSIVCENCLYSLEKDRRVRAFHIMDPKGVLEMLLVFLEERGNGEAIPPSFDDFKEDTERILPHLGTWKGHSRTTRTGVYGATITEASTTAVLEINKDGQLIQDITSTSGATNITTNVHWTGTISNNLVTFDGGFQLTLLPGGIYMGYPSDVAKNVQESTAFHVEFCWLESPGKRQRLIRTYDVEGFAV…	5	16	5	1.276	0.00822831	747	5	3	8	'1.1.9.3.2'	'Photosynthesis.photophosphorylation.ATP synthase complex.assembly.assembly factor *(BFA1)'	'mercator4v5.0: ATP synthase complex assembly factor *(BFA1) & original description: Genomic DNA chromosome 3 P1 clone MXO21 (AHRD V1 ***- Q9LS78_ARATH)'	Cp	2	Cp	Cp	Cp	Cp	96.2	plastid	plastid	-	Cp	0.93	0	No	Detected by both ITAG and Atlas
Solyc02g088460	Chorismate mutase 1 (AHRD V1 **** D2CSU4_PETHY); contains Interpro domain(s) IPR008238 Chorismate mutase of the AroQ class, eukaryotic type	CM1	At3g29200	XP_004232192.1	MEAQLLRLSSTPITTPLITNYKRNNTLLPHQKFLKFHLSNSGTIKHGIRPIQAFSASLGEMKRIDETESYTLDGIRNSLIRQEDSIIFSLVERAQYCFNAETYDPNVFVMDGFHGSLVEYIVKETEKLHAKVGRYTSPDEHPFFPKTLPEPMLPPMQYPKVLHSAADSININVTIWEMYFKKLLPRLVKEGNDGNSGSTAVCDTICLQALSKRIHYGKFVAEAKFRASPDVYKAAIKAQDRDGLMDLLTYPTVEEAIKNRVEMKTKTYGQELNNGPEHVGDPVYKIKPSLVAELYGDWIMPLTKDVQVEYLLRRLD	5	18	5	2.455	0.0158311	532	5	3	8	'4.5.2.1'	'Amino acid metabolism.shikimate group amino acid biosynthesis.phenylalanine and tyrosine.chorismate mutase'	'mercator4v5.0: chorismate mutase & swissprot: Chorismate mutase 1, chloroplastic & original description: Chorismate mutase 1 (AHRD V1 **** D2CSU4_PETHY); contains Interpro domain(s) IPR008238 Chorismate mutase of the AroQ class, eukaryotic type'	Cp	5	-	possibly Cp	Cp	Cp	99.7	plastid stroma	-	-	Cp	0.6	0.03	No	Detected by both ITAG and Atlas
Solyc02g088540	tRNA guanosine-2'-O-methyltransferase (AHRD V1 *-*- B9L1B3_THERP); contains Interpro domain(s) IPR001537 tRNA/rRNA methyltransferase, SpoU	-	At5g15390	XP_004232187.1	MSACKTLVRSSISFFQFQTRNSYQRSFSSHISSNFSFFRPLPLLSRNPAFRIEPCRDPSRRYGSTQGAISLETSEEMAVPRVAVESSEEKSKDTVEELLYNKDDVSKLMKMERRLDTEGLGHQERWFPYLDKVKAGSMYLSSSEILEAVTPYIMDSRKERFRHAVKNRTYSVCLVVEGLSDFGNVSATFRSADALGIQSVHVVACDSSKRYRENRHVSMGAEKWLDIELWDSVHECFTVLKSRGYRIATTHLGMDTVSVYDMDWSCPTAIVVGNELRGISDEALESSDLHCSIPMKGMVDSFNVSVAAGLLMHHAVCDRTSRLGCHGDLTREESRILLAEFSLRHNDNAIRIAQEYAERKIAELKSKL	1	1	1	0.233	0.0015025	1097	1	1	2	'16.2.6.2.16'	'RNA processing.RNA modification.RNA methylation.tRNA methylation.TrmH-type tRNA methyltransferase'	'mercator4v5.0: TrmH-type tRNA methyltransferase & original description: tRNA guanosine-2&apos-O-methyltransferase (AHRD V1 *-*- B9L1B3_THERP); contains Interpro domain(s) IPR001537 tRNA/rRNA methyltransferase, SpoU'	Cp	4	Cp	possibly M	Cp	Cp	88.3	-	-	-	M	0.16	0	No	Atlas only
Solyc02g088610	ATP-dependent chaperone ClpB (AHRD V1 **** B5W0X8_SPIMA); contains Interpro domain(s) IPR017730 Chaperonin ClpB	CLPB3	At5g15450	NP_001234143.2	MSTVTSFSGVQFCVPSSSSNSSNRVALFSSHSAPYLNFSGKSRVLGKCSSLKLKRKDVFFSRKTEKLSQGSRLTVRCDASNGRITQQDFTEMAWQAIVASPEIAKENKHQIVETEHLMKALLEQKNGLARRIFSKTGVDNTRLLEATDKFIRQQPKVIGETAGSMLGRELEGLMQRAREYKKEYGDSFVSVEHLVLGFIQDKRFGKQLFNDFQISLKTLKTAIESIRGRQNVIDQDPEGKYESLEKYGKDLTAMARAGKLDPVIGRDDEIRRCIQILSRRTKNNPVLIGEPGVGKTAISEGLAQRIVQGDVPQALMNRRLISLDMGALIAGAKYRGEFEDRLKAVLKEVTESEGQIILFIDEIHTVVGAGATNGAMDAGNLLKPMLGRGELRCIGATTL…	45	214	43	17.166	0.110695	98	5	3	8	'26.5.2.4'	'External stimuli response.temperature.heat response.organellar chaperone *(Clp-p/Clp-m)'	'mercator4v5.0: organellar chaperone *(Clp-p/Clp-m) & swissprot: Chaperone protein ClpB3, chloroplastic & original description: ATP-dependent chaperone ClpB (AHRD V1 **** B5W0X8_SPIMA); contains Interpro domain(s) IPR017730 Chaperonin ClpB'	Cp	1	Cp	Cp	Cp	Cp	97.9	plastid stroma	plastid	plp_at_02561	Cp	0.98	0.02	No	Detected by both ITAG and Atlas
Solyc02g090030	Oxygen-evolving enhancer protein 1 of photosystem II (AHRD V1 ***- A8J0E4_CHLRE); contains Interpro domain(s) IPR002628 Photosystem II manganese-stabilizing protein PsbO	PSBO-2 OEE1-2B	At3g50820	NP_001308345.1	MAASLQAAATLMQPTKVGGVSARNNLPLRSAQSLSKAFGLEPSASKLSCSLQADLKDFAQKCTDAAKIAGFALATSALVVSGANAEGVPKRLTFDEIQSKTYMEVKGTGTANQCPTIDGGVDSFSFKPGKYNAKKFCLEPTSFTVKAEGVSKNSAPDFQKTKLMTRLTYTLDEIEGPFEVSPDGTVKFEEKDGIDYAAVTVQLPGGERVPFLFTIKQLVASGKPESFSGDFLVPSYRGSSFLDPKGRGGSTGYDNAVALPAGGRGDEEELQKENVKNTASLTGKITFTVTKSNPQTGEVIGVFESIQPSDTDLGAKTPKDVKIQGIWYAQLES	15	309	3	13.125	0.0846368	123	5	3	8	'1.1.1.2.2.1'	'Photosynthesis.photophosphorylation.photosystem II.PS-II complex.oxygen-evolving center (OEC) extrinsic components.component *(OEC33/PsbO)'	'mercator4v5.0: component *(PsbO/OEC33) of PS-II oxygen-evolving center & swissprot: Oxygen-evolving enhancer protein 1, chloroplastic & original description: Oxygen-evolving enhancer protein 1 of photosystem II (AHRD V1 ***- A8J0E4_CHLRE); contains Interpro domain(s) IPR002628 Photosystem II manganese-stabilizing protein PsbO'	Cp	3	Cp	Cp	Cp	Cp	100	thylakoid-peripheral-lumenal-side	plastid	plp_at_00332; plp_at_01217; plp_at_01657; plp_at_01823; plp_at_01935; plp_at_02427	Thylakoid	0.36	0.64	Yes	Detected by both ITAG and Atlas
Solyc02g090100	Unknown Protein (AHRD V1), possibly ycf	-	At2g23670	XP_004232074.1	MSSTTTSLTVRTYPPRCVLNANTNPPTKQAAVALRGRRQLISLVTATTVVKALEMPSKAADIGLFGLRKKLKKVEDEAEELVKEGFEAADKGIAAAEKGIEAAEKGLLTAEKGIEAAEEKIESTVSFGGLAQAGAVAGAEFVGVLIAGAVVNGILGPEPQKS	3	11	3	1.154	0.00744159	771	5	2	7	'35.2'	'not assigned.not annotated'	'mercator4v5.0: not classified & original description: Unknown Protein (AHRD V1)'	Cp	3	Cp	possibly M	Cp	Cp	97	thylakoid	plastid	plp_at_00188; plp_at_01182; plp_at_01763	Cp	0.87	0.12	No	Detected by both ITAG and Atlas
Solyc02g090670	Methionine aminopeptidase (AHRD V1 ***- B9H6F3_POPTR); contains Interpro domain(s) IPR002467 Peptidase M24A, methionine aminopeptidase, subfamily 1	MAP1D	At4g37040	XP_004232042.1	MVGFVSTFLGDCRFINHPHSLRRLFHYKPGNKHVSMQCSRTFSGLTDLLFNRRNVDELPNTNRKRLRPGQISPPRPVPEQIQRPPYVKSRKPPGIGSGSEVHDKKGIEKMRASGRLAAQVLQYAGTLVKPGIMTDEIDQAVHQMIIDNGAYPSPLGYGGFPKSVCTSINECICHGIPDSRPLEDGDIINIDVTVYLNGYHGDTSAMFFAGTVDEEAKNLVQVTKECLDKAISICAPGVEFNKIGKTIHDLADKHRYGVVQQFVGHGVGRAFHSDPVILHYRNNDRGRMILNQTFTIEPMLTIGSIDGVIWGDDWTVVTDDGSLSAQFEHTILITADGAEILTQC	3	13	3	2.162	0.0139417	568	5	3	8	'19.2.1.2.1.1'	'Protein homeostasis.ubiquitin-proteasome system.N-degron pathways.Arg/N-degron pathway.N-terminal modification.methionyl aminopeptidase *(MAP1)'	'mercator4v5.0: methionyl aminopeptidase *(MAP1) & swissprot: Methionine aminopeptidase 1D, chloroplastic/mitochondrial & original description: Methionine aminopeptidase (AHRD V1 ***- B9H6F3_POPTR); contains Interpro domain(s) IPR002467 Peptidase M24A, methionine aminopeptidase, subfamily 1'	Cp	5	Cp	Cp	Cp	C	70.7	plastid stroma; mitochondria	mitochondrion,plastid	-	-	0.26	0.06	No	Detected by both ITAG and Atlas
Solyc02g090890	Zeaxanthin epoxidase, chloroplastic	ZEP ABA1	At5g67030	NP_001296233.1	MYSTVFYTSVHPSTSVLSRKQLPLLISKDFSAELYHSLPCRSLENGHINKVKGVKVKATIAEAPVTPTEKTDSGANGDLKVPQKKLKVLVAGGGIGGLVFALAAKKRGFDVLVFERDLSAIRGEGQYRGPIQIQSNALAALEAIDLDVAEDIMNAGCITGQRINGLVDGISGNWYCKFDTFTPAVERGLPVTRVISRMTLQQILARAVGEEIIMNESNVVDFEDDGEKVTVVLENGQRFTGDLLVGADGIRSKVRTNLFGPSEATYSGYTCYTGIADFVPADIDTVGYRVFLGHKQYFVSSDVGGGKMQWYAFYNEPAGGADAPNGKKERLLKIFGGWCDNVIDLLVATDEDAILRRDIYDRPPTFSWGRGRVTLLGDSVHAMQPNLGQGGCMAIEDSY…	23	170	23	12.219	0.0787944	131	5	3	8	'1.1.1.5.3.1.2.2'	'Photosynthesis.photophosphorylation.photosystem II.photosynthetic acclimation.non-photochemical quenching (NPQ).qE/qZ-type quenching.xanthophyll cycle.zeaxanthin epoxidase *(ZEP)'	'mercator4v5.0: zeaxanthin epoxidase *(ZEP) & swissprot: Zeaxanthin epoxidase, chloroplastic & original description: Zeaxanthin epoxidase, chloroplastic'	Cp	5	-	Cp	Cp	M	68.3	thylakoid-peripheral-stromal-side; stroma	plastid	plp_at_01620	Cp	0.97	0.01	No	ITAG only
Solyc02g091280	ATP-dependent Clp protease proteolytic subunit (AHRD V1 **** B9H362_POPTR); contains Interpro domain(s) IPR001907 Peptidase S14, ClpP	CLPP3	At1g66670	XP_004232007.1 D'Andrea et al (2018)	MEGSCLTFSTALAPARPSTCLHYNSTFVKQFQTNTITPRRGLSVKASTHKPTLSTNWDVSSYSKAPAWMPRFEELDTTNMLLRQRIIFLGSQVDDITADFIISQLLILDAEDDKKDIRLIINSPGGSVTAGMGIYDAMKMCKADVSTICMGLAASMGAFLLASGSKGKRYCMPNAKVMIHQPLGTSGGKATEMGIRIREMGYHKMKLNKILSRVTGQPLEKIEVDTDRDNFMNAWESKEYGLVDAVIDDGKPGLVAPITEDAPPPKTRVWYKWKAEGTRKRKNNWPSEEKLFQNDEQSNEQKDEALSPL	6	30	6	3.125	0.0201516	451	5	3	8	'19.4.2.9.1'	'Protein homeostasis.proteolysis.serine-type peptidase activities.chloroplast Clp-type protease complex.proteolytic core component *(ClpP1/3-6)'	'mercator4v5.0: proteolytic core component *(ClpP1/3-6) of chloroplast Clp-type protease complex & swissprot: ATP-dependent Clp protease proteolytic subunit 3, chloroplastic & original description: ATP-dependent Clp protease proteolytic subunit (AHRD V1 **** B9H362_POPTR); contains Interpro domain(s) IPR001907 Peptidase S14, ClpP'	Cp	2	Cp	possibly Cp	Cp	Cp	91.7	plastid stroma	plastid	plp_at_01341; plp_at_02500	Cp	0.98	0	No	Detected by both ITAG and Atlas
Solyc02g091290	Methionyl-tRNA formyltransferase (AHRD V1 ***- B9GV84_POPTR); contains Interpro domain(s) IPR005794 Methionyl-tRNA formyltransferase	-	At1g66520	XP_010316070.1	MLSSSVMIRRFCSFNVTASSSAITSTTKKKRLVFLGSPQVSASVLDALFNASAAPDSLFEITAIVTQPPSGRDRGRKVMPSPVAQHALDRGFPSDLIFTPVKAGEEAFLFNFKSLEPELCVTAAYGNILPTKFLNIPSKGTVNIHPSLLPLYRGAAPVQRALEDGVKETGVSLAYTVRKLDAGPVIACERVTIDDQIKAPDLLDLLFNLGSKLLIRELPSIFDGSASGIAEEQDDSKATLAPKITPEESWLSFDDDAQVLHNKVRAFAGWPGTRARLKVIDPNNGESSIIELKIITTRIYGGINSQDIEANDVLFTKSSLVIPCGGGTALEVLEIQLPGKRAVNAAAFWNGLRGQMLKKL	5	11	5	1.581	0.0101951	680	4	3	7	'17.6.3.1'	'Protein biosynthesis.organelle machinery.translation initiation.methionyl-tRNA formyltransferase'	'mercator4v5.0: methionyl-tRNA formyltransferase & original description: Methionyl-trna formyltransferase (AHRD V1 ***- B9GV84_POPTR); contains Interpro domain(s) IPR005794 Methionyl-tRNA formyltransferase'	Cp	4	Cp	M	Cp	M	96.9	plastid	mitochondrion	-	M	0.04	0.01	No	ITAG only
Solyc02g091340	Pyridoxal kinase isoform 1, pyridoxal kinase (Salt overly sensitive 1)	SOS4	At5g37850	XP_004231999.1	MARPPILALAIPSDTGRVLSIQSHTVQGYVGNKSAVFPLQLLGYDVDPINSVQFSNHTGYPTFKGQVLNGEQLWELIEGLEANGLLYYTHLLTGYIGSVSFLNTVLKVVDKLRSVNPKLKFVCDPVMGDEGKLYVPPELVTVYREKVVPVASMLTPNQFEAEQLTGSRITSEKDGQEACNILHAAGPSKVVITSINIDGTLLLIGSHQKEKGQSPEQFKIVIPKIPAYFTGTGDLTTALLLGWSNKYPDDLDKAAELAVSSVQALLLRTLADYQKVGYDCQSSSLEIRLIQSLDDIRNPEVKYRAKRYN	1	5	1	0.52	0.00335323	978	3	2	5	'7.7.2.1'	'Coenzyme metabolism.pyridoxal-phosphate homeostasis.salvage biosynthetic pathway.pyridoxal kinase *(SNO1/SOS4)'	'mercator4v5.0: pyridoxal kinase *(SNO1/SOS4) & swissprot: Pyridoxal kinase & original description: Pyridoxal kinase (AHRD V1 **** Q4JR84_SOLTU); contains Interpro domain(s) IPR004625 Pyridoxal phosphate (active vitamin B6) biosynthesis, pyridoxal kinase'	-	4	-	possibly ER	Cp	C	69.14	-	-	-	-	0.06	0	No	ITAG only
Solyc02g091490	Fructokinase 3 (AHRD V1 **-* Q6VWJ5_SOLLC); contains Interpro domain(s) IPR011611 Carbohydrate/purine kinase	FRK3	At1g66430	NP_001234396.2	MALHATAFSFTGVSTSSKSSRSALLSVFPLPRRCTVKATSQYPHSFPRCKIQGRALPSDNGLVEKDESSLVVCFGEMLIDFVPTTSGLSLAEAPAFKKAPGGAPANVAVGISRLGGSSAFIGKVGEDEFGYMLAEILKENNVNSDGMRFDPGARTALAFVTLRKDGEREFMFYRNPSADMLLQEDELDLELIRKAKVFHYGSISLITEPCKSAHIAAAKAAKDAGVILSYDPNLRLPLWPSAESAREGILSIWNTADIIKISEEEISFLTQGEDPYDDNVVRKLYHPNLKLLLVTEGPEGCRYYTKDFSGRVKGIKVDAVDTTGAGDAFVAGILSQLASDVSLLQDEGKLRDALSFANACGALTVMERGAIPALPTKEVVLNALLKSVA	11	106	9	4.179	0.0269484	362	5	3	8	'3.1.4.4'	'Carbohydrate metabolism.sucrose metabolism.degradation.fructose kinase'	'mercator4v5.0: fructose kinase & swissprot: Probable fructokinase-6, chloroplastic & original description: Fructokinase 3 (AHRD V1 **-* Q6VWJ5_SOLLC); contains Interpro domain(s) IPR011611 Carbohydrate/purine kinase'	Cp	2	Cp	Cp	Cp	Cp	94.9	plastid stroma	plastid	plp_at_02499	Cp	0.98	0.01	No	Detected by both ITAG and Atlas
Solyc02g091530	PTST; 5'-AMP-activated protein kinase subunit beta-1 (Fragment)	PTST	At5g39790	XP_025885479.1	MNISILLRQSEIWKSVVIYERYKSDRIVIEKNILFMNLISAIAAELGIDESKKDIEIRYVVEGVALPCNCCFEFHQLGRNSLIMDCNLLNSLGQTCFPRFKVENIDGVRGNMTSYKSRIGFCRMHTLFSVPNWKLSIPCTSWKIFCAPENSLVVSEKIEDAGLSDPEQVPEQPLRTEELKLLLADAERSKLLKKLSEANRYNRLLKRELQAKEDAMVNFKSELSVTELEIQALARLAEEIAKSAIPAGSRKIKGRYIQSHLFSRLEAISEKLKEQIKGVEAVQAKEVPLSWVGVAESVQVMGSFDGWSQGEHLSPEYTGSYMNFSATLFLRPGRYEIKFLVDDEWKLSPELPTTGEGLTKNNLLVVE	6	17	6	1.404	0.00905372	718	5	3	8	'3.2.2.4.7'	'Carbohydrate metabolism.starch metabolism.biosynthesis.starch synthase activities.scaffold protein of amylose biosynthesis *(PTST1)'	'mercator4v5.0: scaffold protein of amylose biosynthesis *(PTST1) & swissprot: Protein PTST, chloroplastic & original description: 5&apos;-AMP-activated protein kinase subunit beta-1 (Fragment) (AHRD V1 *-*- AAKB1_PIG)'	-	4	-	none	Cp	C	99.82	plastid	-	-	-	0	0	No	Detected by both ITAG and Atlas
Solyc02g091560	Serine hydroxymethyltransferase IPR001085 Serine hydroxymethyltransferase	SHM1	At4g37930	XP_004231981.1	MAMAIALRRLSATIDKPVKSLYNGGSIYYMSSLPNEAVYDKEKSGVAWPKQLNAPLEVVDPEIADIIEHEKARQWKGLELIPSENFTSVSVMQAVGSVMTNKYSEGYPGARYYGGNEYIDMAETLCQKRALEAFRLDPAKWGVNVQPLSGSPANFHVYTALLKPHERIMALDLPHGGHLSHGYQTDTKKISAVSIFFETMPYRLDESTGYIDYDQLEKSATLFRPKLIVAGASAYARLYDYDRIRKVCNKQKAILLADMAHISGLVAAGVIPSPFDYADVVTTTTHKSLRGPRGAMIFYRKGVKEVNKQGKEVFYDYEDKINQAVFPGLQGGPHNHTITGLAVALKQATTPEYRAYQEQVLSNSAKFAQALEEKGYELVSGGTDNHLVLVNMKNKGIDG…	17	86	12	6.667	0.0429923	241	5	3	8	'1.3.5'	'Photosynthesis.photorespiration.serine hydroxymethyltransferase *(SHM)'	'mercator4v5.0: serine hydroxymethyltransferase & swissprot: Serine hydroxymethyltransferase, mitochondrial & original description: Serine hydroxymethyltransferase (AHRD V1 **** C6ZJZ0_SOYBN); contains Interpro domain(s) IPR001085 Serine hydroxymethyltransferase'	-	5	-	M	Cp	M	65.95	-	mitochondrion	plp_at_00473	M	0	0	No	Detected by both ITAG and Atlas
Solyc02g091580	Oligopeptidase A (AHRD V1 ***- Q9LSL3_ARATH); contains Interpro domain(s) IPR001567 Peptidase M3A and M3B, thimet/oligopeptidase F	OOP TOP1	At5g65620	XP_004231980.1	MKYRRIGSPLSRILYGSSTTPSLILSLFLILMATRFSLSRSARLCLRPTSTFSRLSTKNLLQCPSCPLWSSSFSLCLHTFRKSTSPGKSITVRSFSPSSASISDHPSKMSMASDDNPLLKDFDFPPFDVIEAKHVRPGIRALLNKIEEELSALEKSVEPTWPKLAEPLEKIIDRLTVVWGAVNHLKSVKDNPELRSALEEVQPEKVAFQLKLGQSKPIYNAFKAIRESPEWDSLSDARKRIVESQIKEAVLSGIALEDDQREQFNKIEQDLAKLSQKFDENVLDSTKKFEKLIIDKKDIDGLPATSLGLAAQTAVSKGHENATAEDGPWIITLDAPSYMSVIQHAKNRTLREEVYRACINRASSGDLDNTEIINQILKLRLEKAKLLGYNNYAEVSMAM…	28	113	28	8.454	0.0545158	194	5	3	8	'19.4.5.1'	'Protein homeostasis.proteolysis.metallopeptidase activities.M3-class (Thimet) metalloprotease'	'mercator4v5.0: M3-class (Thimet) metalloprotease & swissprot: Organellar oligopeptidase A, chloroplastic/mitochondrial & original description: Oligopeptidase A (AHRD V1 ***- Q9LSL3_ARATH); contains Interpro domain(s) IPR001567 Peptidase M3A and M3B, thimet/oligopeptidase F'	M	5	Cp	M	Cp	PM	90.8	plastid stroma; mitochondria	plastid	plp_at_02575	M	0.03	0	No	Detected by both ITAG and Atlas
Solyc02g091640	Uncharacterized protein	-	At4g37920	XP_004231977.1	MSRLHCLETSIFATANLSLFHTPFSPSAVLPITSTKPASLLFENFKKSASRTPTRTSANNPTTKVLASGVSTAAVDGEADVEVAEGYTITQFCDKMIDLFLNEKPKSKDWRKYLVFREEWKKYGDRFYSRCRTRADTEDDSQMKEKLISLARKVRKIDDEMERHTELLKEIQDNPRDLNAIVTKRRKDFNGEFFRHLSLLSETYNSLEDRDAFARLGTRCLSAVSAYDNTLEIVGTLDTAQAKFDDILNSMSVDAACDKIKSLAKSKELDSSLVLLINGAWASAKESSTMRNEVKEIMHRLYKATQSSLRSMAPKEIKLLKYLLNITDPEERFSALATAFSPGHEHDAKDPNAIYTSPKELHKWIKIMLDAYNMNKEETEIREAKQLDQPMVIQRLSIL…	1	3	1	0.105	0.000677094	1200	3	0	3	'15.6.1.2.4.4'	'RNA biosynthesis.organelle machinery.RNA polymerase activities.plastid-encoded RNA polymerase (PEP) complex.PEP assembly/activity regulation.regulatory factor *(RP8) of RpoA activity'	'mercator4v5.0: regulatory factor *(RP8) of RNA polymerase RpoA activity & swissprot: Uncharacterized protein At4g37920 & original description: Endoribonuclease E-like protein (AHRD V1 **-- Q656E2_ORYSJ)'	Cp	1	Cp	none	Cp	N	69.9	plastid	plastid	-	Cp	0.89	0	No	Detected by both ITAG and Atlas
Solyc02g091970	Branched-chain-amino-acid aminotransferase (AHRD V1 ***- Q9SNY8_SOLTU); contains Interpro domain(s) IPR005786 Branched-chain amino acid aminotransferase II	BCAT	At3g49680	XP_004231952.1	MEFILQFQKQSHFTSYIGNSAINSGNSFRVASPASDVASELADIDWDNLGFGFMPTDYMYSMKCSQGENFSKGELQRFGNIELSPSAGILNYGQGLFEGLKAYRKHDGNILLFRPEENATRLKMGAERMCMPSPSVEQFVEAVKATVLANERWIPPPGKGSLYIRPLLMGSGAVLGLAPAPEYTFLIYVSPVGNYFKEGLAPINLVVETEMHRATPGGTGGVKTIGNYAAVLKAQSAAKAKGYSDVLYLDCVQKKYLEEVSSCNVFIVKGNLIVTPAIKGTILPGITRKSIIDVAISQGFEVEERQVSVDELLDADEVFCTGTAVVVSPVGSITHQGRRVTYGNDGVGLVSQQLYSALTSLQMGLSEDKMGWIVELK	9	52	5	6.499	0.0419089	245	5	3	8	'4.2.2.8.6'	'Amino acid metabolism.aspartate group amino acid biosynthesis.aspartate-derived amino acids.isoleucine.valine/leucine/isoleucine aminotransferase'	'mercator4v5.0: valine/leucine/isoleucine aminotransferase & swissprot: Branched-chain amino acid aminotransferase 2, chloroplastic & original description: Branched-chain-amino-acid aminotransferase (AHRD V1 ***- Q9SNY8_SOLTU); contains Interpro domain(s) IPR005786 Branched-chain amino acid aminotransferase II'	-	5	-	possibly Cp	Cp	Cp	82.3	plastid stroma	plastid	-	-	0.01	0	No	Detected by both ITAG and Atlas
Solyc02g093140	CBS domain-containing protein-like (AHRD V1 ***- B8AP73_ORYSI); contains Interpro domain(s) IPR000644 Cystathionine beta-synthase, core	CBSX1 LEJ2	At4g36910	XP_004231863.1	MASISPSGSCLHRTPAAFHRQLPCLLLSLPGHILAASTKFYLPLRLSDSRDTFRLASANTLTANSVPPRNGVYTVGDFMTRKEELHVVKPTTSVDEALEALVEHRITGFPVIDDNWKLVGLVSDYDLLALDSVSGTGTADAGIFPEVDSNWKTFNEVQKLLGKTKGKVVGDLMTPAPLVVRESTNLEDAARLLLKTKYRRLPVVDGKGKLVGIITRGNVVRAALQIKRATEMED	5	10	2			1258	0	2	2	'10.3.5'	'Redox homeostasis.thiol-based redox regulation.regulatory protein *(LEJ1/2)'	'mercator4v5.0: regulatory protein *(LEJ1/2) of thiol-based redox regulation & original description: CBS domain-containing protein-like (AHRD V1 ***- B8AP73_ORYSI); contains Interpro domain(s) IPR000644 Cystathionine beta-synthase, core '	Cp	3	Cp	Cp	Cp	Cp	86.4	plastid stroma	plastid	-	Cp	0.84	0.02	NA	Atlas only
Solyc02g093170	Cyclin delta-3 (AHRD V1 **-- Q94JY0_ARATH)	PAB	At4g34090	XP_004231860.1	MKLGGGVGFGCPRAVAFPGILFSRCRPTFRCYSSSSSPDHVSFIKDVAATQAPEHLNELLKILQVRGEEIISPGAKQGLVPLVIPLSRRSSDSVTALLRWPTAPSGMEMPLVEVRKYGVWLLSKNVDQYIHRVLAEEDANGNQEKVDELFRISAGAGKKLYEKGDFGASKISNIDTYILKKVGLFPDVLERRIKQHFDNGDNISALVTGEFYTKKEHFPGFARPFVFNAEVLLKVGRNIEAKDAARGALKSPWWTLGCEYHEVANMAEWEDEQIEYIKEKVTEEGREADLKKGKQPAQVALDEAAFLLDLASIDGSWDDCAERIAECYKEAGLHEVANFVVYRD	13	56	13	6.079	0.0392005	269	5	3	8	'13.2.1.1.10'	'Cell division.cell cycle organisation.cell cycle control.CYCLIN regulatory protein activities.regulatory protein *(CYL1)'	'mercator4v5.0: regulatory protein *(CYL1) of cell cycle & swissprot: Protein IN CHLOROPLAST ATPASE BIOGENESIS, chloroplastic & original description: Cyclin delta-3 (AHRD V1 **-- Q94JY0_ARATH)'	M	3	Cp	none	Cp	Cp	88.6	plastid stroma	plastid	plp_at_02445	M	0.08	0	No	Detected by both ITAG and Atlas
Solyc02g093460	tRNA pseudouridine synthase B (AHRD V1 *-*- D0MI93_RHOM4); contains Interpro domain(s) IPR020103 Pseudouridine synthase, catalytic domain	-	At5g14460	XP_004231838.1	MAKSVVIPRMSLIFLRSKSISQPRTVFFPSMLNSLLLKSHSLHFFSTTSTPYPLQYEMIISRPANPPSPTLKSRQQRFLPKSKPNDSEPLPGSELGFDDWVDRKLNLKSSSPQAEPQPEEPNSGIMEMDKGKRKYYNKRRKRMFGGSDSEDENNRDKDNELVELKQEVVELPTLHKKEEELYFYDNFAYPWEKDKHYKMVYQLEKKFFPDQGFDKAFLDPGQSNENVNRSKKKLGKKENLIEKDIDGGDGKSLIFFEEEEKSVSSETKKEAKVDVAEKKVEDFFKCLKKVPNKENGVVSAEPFLATRSTGLPPKWDSPGGTVVLVNKPKGWTSFTVCGKLRRLTKVKKVGHAGTLDPMATGLLIVCVGKSTKIVDSYQGMTKGYSGIFRLGEATSTWDA…	2	3	2	0.16	0.00103176	1157	2	0	2	'16.2.5.1.2'	'RNA processing.RNA modification.RNA pseudouridylation.stand-alone pseudouridine synthase activities.TruB-type tRNA pseudouridine synthase'	'mercator4v5.0: TruB-type tRNA pseudouridine synthase & swissprot: H/ACA ribonucleoprotein complex subunit 4 & original description: tRNA pseudouridine synthase B (AHRD V1 *-*- D0MI93_RHOM4); contains Interpro domain(s) IPR020103 Pseudouridine synthase, catalytic domain'	Cp	3	Cp	ER	Cp	M	49.2	plastid stroma	-	-	M	0.01	0	No	Detected by both ITAG and Atlas
Solyc02g093550	Methyltransferase type 11 (AHRD V1 ***- C7QSM0_CYAP0); contains Interpro domain(s) IPR013216 Methyltransferase type 11	-	At3g01660	XP_004231829.1	MFLTIVTHSHPKTWKSPNLHLFPLPSKTKTQPSIIITPKAYNNEDNNSTAGKIKRMVLTQQGRTKLNILPDKEFYAYPRFVTHVDDRFISNLTDLYRKCLKPEFEILDLMSSWVSHLPQEVKYKKVVGHGLNAQELAKNPKLDYFFVRDLNEDEKFEFENCSFDAVLCTVSVQYLQQPEKVFAEVFRILRPGGVFIVSFSNRLFYDKAISAWRDSTGYGRVQLVVQYFQCIKGFTEPQVIRKLPTNDDQQNKSPLSKIMQLIGLLSASSDPFYAVIAYRNFKPVHE	1	1	1	0.122	0.000786719	1187	1	1	2	'35.2'	'not assigned.not annotated'	'mercator4v5.0: not classified & original description: Methyltransferase type 11 (AHRD V1 ***- C7QSM0_CYAP0); contains Interpro domain(s) IPR013216 Methyltransferase type 11'	Cp	5	Cp	none	not Cp	M	55	-	mitochondrion	-	Cp	0.63	0	No	Detected by both ITAG and Atlas
Solyc02g093940	mTERF domain-containing protein , mitochondrial (AHRD V1 *--- MTER1_HUMAN); contains Interpro domain(s) IPR003690 Mitochodrial transcription termition factor-related	mTERF5	At4g14605	XP_004231794.1	MTSFMQLRIPNAKLAFFSRTSRVPLYRIVLSFPQKVFFCTAKYSESEVDGSFSLRLVPPTLVAAEKEEAKAVLTLFLKKQGLSNALAARAINRSESFIEHLVSRLHSVHKSRYLVGRELTTLEIRDALIPYLEALHEEYGSILVDVVESFPNPPVVEKIEETVEKVPIPVTPASPPSAVLDSKKLKALARVTDIGPTGKLPPHILYLVELGMDIERIRVITRKFPAFAYYSLEGKIKPVVEFLLDLGVPRSQIPTILSKRPQLCGISLSDNLIPTMTFLEELGVDKEQWAKVIYRFPALLTYSRPKLKATVDFLYEMGLSAECVSKVLTRCPNIISYSVEDKLRPATEYFRSMGVDVGVLLYRCPQTFGLSIEANIKPATEFFKDKGFSMTEIATMVSR…	7	17	7	0.931	0.00600357	827	5	3	8	'15.6.2.2'	'RNA biosynthesis.organelle machinery.transcriptional regulation.mTERF-type transcription factor'	'mercator4v5.0: mTERF-type transcription factor & swissprot: Transcription termination factor MTERF5, chloroplastic & original description: mTERF domain-containing protein 1, mitochondrial (AHRD V1 *--- MTER1_HUMAN); contains Interpro domain(s) IPR003690 Mitochodrial transcription termination factor-related'	M	2	Cp	M	Cp	G	41.9	plastid	plastid	-	M	0.13	0	No	Detected by both ITAG and Atlas
Solyc02g094150	Uncharacterized protein (putative RNA-binding protein) \;Sua5/YciO/YrdC/YwlC family protein (AHRD V1 ***- C9KUX7_9BACE); contains Interpro domain(s) IPR004388 Sua5/YciO/YrdC/YwlC	-	At3g01920	XP_004231776.1	MIVGVEEMSLEAKALGHSGIAGAVPLSFRRSFSSFPTRLSFHTAVPPQTRRFQSLAVIKRSPKRLKYSAPRLTKEDGLLYVQVDQFGSDSWKLDPVVELLKGGAVGVIPTDTLYAIVCDLSSHSAIERLRRIKEIEPSKPLSIICRSFRDIDTYTTGFPRGNAQGLTDIFRAVKHCLPGPYTFILTASKQLPKQCTRYGSATSKYASRKNVGVRIPDDPVCQAILEKLDRPLISTSVKSPKEDEWILDPVIIADVYGPEGLDFVVDAGVRVADPSTVVDMTESAPRIIRQGKGPKQPWMIAEDDDSPVDE	1	4	1	0.359	0.00231502	1040	3	0	3	'16.2.4.1.2'	'RNA processing.RNA modification.tRNA modification.N6-threonylcarbamoyladenosine modification.threonylcarbamoyl-AMP synthase *(SUA5)'	'mercator4v5.0: threonylcarbamoyl-AMP synthase & original description: Sua5/YciO/YrdC/YwlC family protein (AHRD V1 ***- C9KUX7_9BACE); contains Interpro domain(s) IPR004388 Sua5/YciO/YrdC/YwlC'	Cp	3	Cp	none	Cp	C	84.8	plastid	plastid	-	-	0.31	0	No	ITAG only
Solyc02g094420	Shikimate kinase-like (AHRD V1 ***- B9N0W2_POPTR); contains Interpro domain(s) IPR000623 Shikimate kinase	SK-like	At3g26900	XP_004245946.1	MKVVQLAQPFVVPTFCHHLKPPRAVSKHNHDFTISLTLKRKAAEISPDLKGTCLFLVGINSSIKSNSAQLLADALRYYYFDSDSVVEQALGGKDAVRSFMKTDLKGFRDSETEVLKQLSSMGRLVVCAGNGAVQCAANLALMRHGISIWIDVPLDMVAKQIVEEKFQLPAAEAINGSYSEVLTQLTAIYEDSRNGYATADTTIALQNTASRLGYDTLDAVTTEDMVLETLKEVERLMRSKKLMEEAARPF	5	10	5	1.61	0.0103821	671	5	3	8	'4.5.1.4'	'Amino acid metabolism.shikimate group amino acid biosynthesis.shikimate pathway.shikimate kinase'	'mercator4v5.0: shikimate kinase & swissprot: Probable inactive shikimate kinase like 1, chloroplastic & original description: Shikimate kinase (AHRD V1 ***- B9N0W2_POPTR); contains Interpro domain(s) IPR000623 Shikimate kinase'	M	5	-	none	Cp	Cp	100	plastid stroma	plastid	-	-	0.22	0.17	No	Detected by both ITAG and Atlas
Solyc02g094430	Esterase/lipase/thioesterase family protein (TAIR) I; Hydrolase alpha/beta fold family protein (AHRD V1 **-- D7L9I6_ARALY); contains Interpro domain(s) IPR000073 Alpha/beta hydrolase fold-1	ELT5	At3g26840	XP_004231751.1	MEAISAGTYTAAGVSPLLQSRNSCLRITSARFKIASTAATTGRSTASIGQQPPTVPMSIVDSSELEQTTTLNMKDFMKWSKDMIASGSEGGPPRWFSPLDCAAPLKDSPLLLYLPGIDGVGLGLIKHHKRLGKIFNIWCLHVPVTDRTSFSDLVYLVEATVRSEHHHAPRRPIYLLGESFGGCLALAVAARNPHIDLALILANPATRLRESQLENLITLCEVIPEQLHPSMVKLLSVTTGVPARLAVAIPGSGHSLQQAVAELFRGDVAFSSYLSVLADVLPVETLIWRLKILKSAASFVSSRLHAVRSQTLVLSSGKDHLISSPEESEKLHKMLPNCEIRKFNNSGHALLLEADFNLVTVIMGANFYRRGRHLDFVRDFVPPSTSEFDSVYQPYRWME…	1	2	1	0.101	0.0006513	1205	2	2	4	'7.15.3.4.3'	'Coenzyme metabolism.chlorophyll metabolism.chlorophyll catabolism.phytol degradation.phytyl ester synthase *(PES)'	'mercator4v5.0: phytyl ester synthase *(PES) & swissprot: Acyltransferase-like protein At3g26840, chloroplastic & original description: Hydrolase alpha/beta fold family protein (AHRD V1 **-- D7L9I6_ARALY); contains Interpro domain(s) IPR000073 Alpha/beta hydrolase fold-1'	Cp	3	Cp	Cp	Cp	Cp	95.4	plastoglobules	plastid	-	Cp	0.92	0	No	Detected by both ITAG and Atlas
Solyc02g094640	Acetyl-coenzyme A synthetase IPR011904 Acetate--CoA ligase	ACS	At5g36880	XP_004231738.1	MYQRSVHDPSGFWSDIASEFYWREKWGQQVYCENFDVRKGKIKIEWFKGGMTNICYNCLDRNIESGKGDKTAIYWEGNEPGLDSSMTYNQLLARVCQLANYLKDVGVHKGDAVVIYLPMLMELPIAMLACARIGAIHSVVFAGFSAESLAQRIIDCRPKVVITCNAVRRGSKIIYLKEIVDSALLESAQKGIVTDVCLTYENESAMKKEMTKWTKGRDIWWQDVILKYPVTCDVEWVDAEDPLFLLYTSGSTGKPKGVLHTTGGYMVYTATTFKYAFDYKPTDIYWCTADCGWITGHSYVTYGPLLNGATVVVFEGAPNYPDVGRCWDIVDKYKVSIFYTAPTLVRSLMREGDEHVSRYSRKSLRVLGSVGEPINPSAWRWFFNVIGDARCPISDTWWQ…	11	67	6	3.217	0.0207449	438	5	3	8	'5.1.2.3'	'Lipid metabolism.fatty acid metabolism.acetyl-CoA generation.plastidial acetyl-CoA synthetase'	'mercator4v5.0: plastidial acetyl-CoA synthetase & swissprot: Acetyl-coenzyme A synthetase, chloroplastic/glyoxysomal & original description: Acetyl-coenzyme A synthetase (AHRD V1 ***- Q2RNC6_RHORT); contains Interpro domain(s) IPR011904 Acetate--CoA ligase'	-	2	-	none	Cp	C	93.53	plastid stroma	plastid	plp_at_00544; plp_at_02565	-	0	0	No	Detected by both ITAG and Atlas
Solyc03g005000	Peptidase M48 Ste24p (AHRD V1 ***- B6TA12_MAIZE); contains Interpro domain(s) IPR001915 Peptidase M48, Ste24p	-	At3g27110	XP_004233997.1	MASLCFSPSVLSCKIKPPITGFRKQRLSLFVCRAASLPFRDLDADDFRHPLDRQNTLLLRAIPGLKDIGKALLGTVSEQIMLLENIGTSVLVSEDQLPELHYLMVEASRILNIEAPDLYIRQSPVPNAYTLAVSGKKPFVVVHTSLVELLSRNELQAVLAHELGHLKCDHGVWLTFANVLTLGAYTVPGVGSLIAQRLEEQLLRWLRAAELTCDRAALLVAQDPKVVVSVLMKLAGGCPSLSDQLNVDAFLEQARSYDKASSSPVGWYIRNAQTRQLSHPLPVLRAREIDEWSRSQEYRSLLQRAIQVNPVQKV	3	6	3	0.438	0.00282445	1009	3	2	5	'19.4.5.5.1'	'Protein homeostasis.proteolysis.metallopeptidase activities.M48-class metallopeptidase activities.zinc metalloprotease *(PGM48)'	'mercator4v5.0: zinc metalloprotease *(PGM48) & original description: Peptidase M48 Ste24p (AHRD V1 ***- B6TA12_MAIZE); contains Interpro domain(s) IPR001915 Peptidase M48, Ste24p'	Cp	3	Cp	Cp	Cp	G	45.9	plastoglobules	plastid	-	Cp	0.95	0.01	No	ITAG only
Solyc03g005190	ferredoxin (AHRD V1 *-*- Q8LD29_ARATH); contains Interpro domain(s) IPR010241 ferredoxin [2Fe-2S], plant	FDC1	At4g14890	XP_004234013.1	MAPNSIKKLRKLPHVFSKVLQLPIPSDADVEVVENPDFFRFMAKMDQHGENIRNVRAQTVEIHPGITKIVVVRNGGEAMLDQLNVDTWRFRLPTSTKPELATAAFADGELIVTVPKGVNGRGGKDVLLIHTNKTLTLTFSSLTMATIQLTTSPSLTLIPSRKQANLAAIKLNSPWSVRRRENRRVSSVVRAYKVIVEHEGKTTELEVEPDETILSKAIDVGMSVPYDCKLGVCMTCPAKLLSGNVDQSEGMLSDDVVERGYALLCAAYPRSDCHIRVIPEEELLSLQLATADD	3	8	3	0.54	0.0034822	972	5	3	8	'1.1.5.1.2'	'Photosynthesis.photophosphorylation.linear electron flow.ferredoxin electron carrier activities.ferredoxin targeted to non-NADP reduction'	'mercator4v5.0: ferredoxin targeted to non-NADP reduction & swissprot: Ferredoxin C 1, chloroplastic & original description: Ferredoxin (AHRD V1 *-*- Q8LD29_ARATH); contains Interpro domain(s) IPR010241 Ferredoxin [2Fe-2S], plant'	S	5	-	none	Cp	Cp	92.1	plastid	plastid	-	-	0	0	No	Detected by both ITAG and Atlas
Solyc03g005230	2-methyl-6-phytyl-1,4-hydroquinone methyltransferase, chloroplastic	VTE3	At3g63410	XP_010317394.1	MASSILSGSDNFKLLSGISPSGSSFLGSELNLKCLPQKGFVNLRATRTLRPTKCSLSASRPASQPRFIQHKKEAFWFYRFLSIVYDHVINPGHWTEDMRDEALEPAELHARNLQVVDVGGGTGFTTLGIVKHVDAKNVTIIDQSPHQLAKARQKEPLKECKILEGDAEDLPFPTDTFDRYISAGSIEYWPDPQRGIKEAYRVLTIGGVACLIGPVYPTFWLSRFFADVWMLFPKEEEYIEWFKKAGFTQVKLKRIGPKWYRGVRRHGLIMGCSVTGVKPYAGESPLQLGPKVEDVSKPVNPFVFLMRFLLGIMAASYYVLVPIYMWIKDQIVPKGQPI	4	11	3	0.931	0.00600357	828	5	0	5	'10.5.4'	'Redox homeostasis.tocopherol biosynthesis.MPBQ-methyltransferase *(VTE3)'	'mercator4v5.0: MPBQ-methyltransferase *(VTE3) & swissprot: 2-methyl-6-phytyl-1,4-hydroquinone methyltransferase, chloroplastic & original description: Menaquinone biosynthesis methyltransferase ubiE (AHRD V1 *-** A1BDQ8_CHLPD); contains Interpro domain(s) IPR013216 Methyltransferase type 11'	Cp	1	Cp	Cp	Cp	Cp	100	envelope-inner-integral	plastid	plp_at_00372; plp_at_01088; plp_at_01476	Cp	0.9	0	No	Detected by both ITAG and Atlas
Solyc03g005250	Sulfate adenylyltransferase IPR002650 ATP-sulfurylase	APS4	At5g43780	XP_004234019.3	MSQTRSHSGLLIEPDGGKLVELSVDESQRDLKRKEALNLPKIKLTKIDVEWVHVLSEGWASPLKGFMRESEFLQTLHFNSIRLEDGSVVNMSVPIVLAIDDSQKNQVDGSSSVALVVDENNPIAILTDIEIYKHNKEERIARTWGTTAPGLPYVDEAITHSGNWLIGGDLEVIEPVKYHDGLDSFRLSPSELRDEFTRRNADAVFAFQLRNPVHNGHALLMTDTRRLLLEMGYKNPILLLHPLGGYTKEDDVPLHWRMKQHEKVLEAGVLDPETTVLSIFPSPMHYAGPTEVQWHAKARINAGANFYIVGRDPAGMSHPLEKRDLYDADHGKKVLSMAPGLERLNILPFKVAAYDKTKNGMAFFDPSRPQDFIFISGTKMRTLAKTKESPPDGFMCPGG…	9	34	1			1259	0	3	3	'7.11.1'	'Coenzyme metabolism.phosphoadenosine phosphosulfate (PAPS) homeostasis.ATP sulfurylase *(APS)'	'mercator4v5.0: ATP sulfurylase *(APS) & original description: Sulfate adenylyltransferase (AHRD V1 **** Q43170_SOLTU); contains Interpro domain(s) IPR002650 ATP-sulfurylase '	-	2	-	NA	NA	C	85.07	plastid	plastid	-	-	0	0	NA	Detected by both ITAG and Atlas
Solyc03g005260	Sulfate adenylyltransferase (AHRD V1 **** Q43183_SOLTU); contains Interpro domain(s) IPR002650 ATP-sulfurylase	APS1	At3g22890	XP_004234020.1	MAAISSLSLKTPTKIQSLTKTHYSIPLNLPFSCRSKSKRTGSIGSRTRIRCGLLIEPDGGKLVELFVEESQRELKREDALKLPKIKLTKIDLEWVHVLSEGWASPLKGFMREDEFLQTLHFNSIRLEDGSVVNMSVPIVLAIDDSQKNLIGGSTSVALVDDENNPTAILSDIEIYKHNKEERIARTWGTTAPGLPYVDEAITHSGDWLIGGDLKVIDPVKYNDGLDRFRLSPAELRDEFTRRNADAVFAFQLRNPVHNGHALLMTDTRRRLLEMGYKNPVLLLHPLGGYTKADDVPLHWRMKQHEKVLEDGVLDPETTVVSIFPSPMHYAGPTEVQWHAKARINAGANFYIVGRDPAGMSHPLEKRDLYDADHGKKVLSMAPGLERLNILPFRVAAYDK…	18	124	9	12.335	0.0795425	129	5	3	8	'7.11.1'	'Coenzyme metabolism.phosphoadenosine phosphosulfate (PAPS) homeostasis.ATP sulfurylase *(APS)'	'mercator4v5.0: ATP sulfurylase *(APS) & swissprot: ATP sulfurylase 1, chloroplastic & original description: Sulfate adenylyltransferase (AHRD V1 **** Q43183_SOLTU); contains Interpro domain(s) IPR002650 ATP-sulfurylase'	Cp	2	Cp	Cp	Cp	Cp	100	plastid stroma	plastid,cytosol	plp_at_02594	Cp	1	0	No	Detected by both ITAG and Atlas
Solyc03g005340	Acyl-amino acid releasing enzyme, Prolyl endopeptidase (AHRD V1 *-** C0NUP9_AJECG); contains Interpro domain(s) IPR001375 Peptidase S9, prolyl oligopeptidase active site region	AARE1	At4g14570	XP_004234027.2 Yamaguchi et al (2003) Walling (2006)	MTNILSPLAAIRTHSIVSVLLHSHRFPPLSSETRLLKQHRPISCRPFWLTKQSFSVFSKMDCVGASSPKEFPLGLDASLEEEYFSQSSLLQDFTSIPNIDKAWTFTSDGGSQGMFSISQPNLLANKKRRYILPCHISKESTNAVSFQWAAFPIEMSNVSMMIPSPSGSKLLVVRNPENDSPTKFEIWGSSLVEKEFYVPASVHGSVYSDGWFEGISWNSDETLIAYVAEEPAPSKPTFTTFGYKKDNSTDKECGSWKGQGDWEEEWGETYAGKRQPALFIIDVNSGVVRPVEGIGKSLSVGQVVWAPSREGLEQYLVFVGWPSDNRKLGIKYCYNRPCALYAVKAPFSKVEVHQSGTNAAKDVSPIKLTQSISSAFFPRFSPDGKLLIFLSARSSVDSW…	4	10	4	0.311	0.00200549	1062	5	3	8	'50.3.4'	'Enzyme classification.EC_3 hydrolases.EC_3.4 hydrolase acting on peptide bond (peptidase)'	'mercator4v5.0: EC_3.4 hydrolase acting on peptide bond (peptidase) & swissprot: Acylamino-acid-releasing enzyme & original description: Prolyl endopeptidase (AHRD V1 *-** C0NUP9_AJECG); contains Interpro domain(s) IPR001375 Peptidase S9, prolyl oligopeptidase active site region'	Cp	2	Cp	Cp	Cp	Cp	94.1	-	cytosol	-	Cp	0.73	0	No	Detected by both ITAG and Atlas
Solyc03g005730	3-isopropylmalate dehydratase large subunit 2 (AHRD V1 ***- B6U6T6_MAIZE); contains Interpro domain(s) IPR011826 Homoaconitase/3-isopropylmalate dehydratase, large subunit, prokaryotic	IIL1	At4g13430	XP_004234053.1	MAASSAIASSSTTFINKKDVGLSAFSSQASFSVQTARKRISKRIVSVMTPQQTERKPATTGSVKTGMTMTEKILAKASDKPDVSPGDNVWVNVDVLMTHDVCGPGSIGIFKKEFGQNAKVWDREKLVIIPDHYIFTTDERANRNVDILRDFCNEQNIKYFYDIKDLGNFRANPDYKGVCHVALAQEGHCRPGEVLLGTDSHTCTAGAFGQFATGIGNTDAGFVLGTGKILLKVPPTLRFVMDGEMPDYLLAKDLILQIIGEISVAGATYKAMEFVGTTVESLTMEERMTLCNMVVEAGGKNGVIPADKTTYDYLEGRTSVPYEPVYSDEGARYLKEYRFDVSKLEPLVAKPHSPDNRALARECKDVKIDRVYIGSCTGGKTEDFMAAAKVFLASGKKVK…	12	93	9	3.262	0.0210351	435	5	3	8	'4.3.2.5.2.1'	'Amino acid metabolism.pyruvate group amino acid biosynthesis.pyruvate-derived amino acids.leucine.isopropylmalate isomerase heterodimer.large subunit'	'mercator4v5.0: large subunit of isopropylmalate isomerase heterodimer & swissprot: 3-isopropylmalate dehydratase large subunit, chloroplastic & original description: 3-isopropylmalate dehydratase large subunit 2 (AHRD V1 ***- B6U6T6_MAIZE); contains Interpro domain(s) IPR011826 Homoaconitase/3-isopropylmalate dehydratase, large subunit, prokaryotic'	Cp	1	Cp	Cp	Cp	Cp	83.4	plastid stroma	plastid	-	Cp	1	0	No	Detected by both ITAG and Atlas
Solyc03g005780	Chlorophyll a-b binding protein 3C (AHRD V1 **** Q2XTE0_SOLTU); contains Interpro domain(s) IPR001344 Chlorophyll A-B binding protein	CAB3C, LHCB3C	At1g29930	NP_001316912.1 Pichersky et al 1985	MATSTMALSSSTFAGKAVKLSPSSSEITGNGRVTMRKTATKAKPASSGSPWYGPDRVKYLGPFSGESPSYLTGEFPGDYGWDTAGLSADPETFAKNRELEVIHCRWAMLGALGCVFPELLARNGVKFGEAVWFKAGSQIFSEGGLDYLGNPSLVHAQSILAIWACQVVLMGAVEGYRIAGGPLGEVVDPLYPGGSFDPLGLADDPEAFAELKVKEIKNGRLAMFSMFGFFVQAIVTGKGPLENLADHLADPVNNNAWAFATNFVPGK	2	5	1	0.931	0.00600357	829	5	0	5	'1.1.1.1.1'	'Photosynthesis.photophosphorylation.photosystem II.LHC-II complex.component *(LHCb1/2/3)'	'mercator4v5.0: component *(LHCb1/2/3) of LHC-II complex & swissprot: Chlorophyll a-b binding protein 3C, chloroplastic & original description: Chlorophyll a-b binding protein 3C-like (AHRD V1 **** Q2XTE0_SOLTU); contains Interpro domain(s) IPR001344 Chlorophyll A-B binding protein'	Cp	2	Cp	Cp	Cp	Cp	100	thylakoid-integral	plastid	plp_at_00070; plp_at_01154; plp_at_01717	Cp	0.99	0	No	Detected by both ITAG and Atlas
Solyc03g006540	Unknown Protein (AHRD V1)	-	At2g01755	XP_004234127.1	MANMLNHRILFQCNNSQCLPYLLPCYFPNHNSNSIQTIFSLSQSSSLLTSHKSTVKRSLSIVICHARRRIIYDNDDDEKEDNNNSELAMLEFYSQTMRNEALLVKALVDEEDVEVLIFKGFSSCLSCRTSPDPSKSVLPARAVIKCIDRIKGPFDPSNIVYLEKGLTLEAFKDRILPRAK	3	7	3	0.995	0.00641628	812	4	1	5	'35.2'	'not assigned.not annotated'	'mercator4v5.0: not classified & original description: Unknown Protein (AHRD V1)'	Cp	3	Cp	Cp	Cp	C	91.7	plastid stroma	plastid	-	Cp	0.64	0.01	No	Detected by both ITAG and Atlas
Solyc03g006870	Phosphoglucomutase (AHRD V1 **** C1MKX8_MICPS); contains Interpro domain(s) IPR016055 Alpha-D-phosphohexomutase, alpha/beta/alpha I, II and III	PGM	At5g51820	XP_004234144.1	MAMESALASTRVSIPSLCSGITSSHHHHRSLSFLSFPKLCSFKYCFRTISTVPFVVSASSVSPSSPSTSVAQSQDLKIKSVPTKPIEGQKTGTSGLRKKVKVFMQDNYLANWIQALFNSLPLEDYKNGLLVLGGDGRYFNREAAQIIIKIAAGNGVGKILVGKDGILSTPAVSAVIRKREANGGFIMSASHNPGGPEYDWGIKFNYSSGQPAPESITDKIYGNTLSISEIKIADVPDVDLSQLGVTKYGNFSVEVVDPVADYLELMENVFDFSLIRSLVSRPDFRFVFDAMHAVTGAYAKPIFVDKLGASLDSIANGVPLEDFGHGHPDPNLTYAEDLVNILYGENGPDFGAASDGDGDRNMILGRSFFVTPSDSVAIIAANAQDAIPYFQSGPKGLAR…	16	141	16	5.918	0.0381623	277	5	3	8	'3.2.2.2'	'Carbohydrate metabolism.starch metabolism.biosynthesis.plastidial phosphoglucomutase'	'mercator4v5.0: plastidial phosphoglucomutase & swissprot: Phosphoglucomutase, chloroplastic & original description: Phosphoglucomutase (AHRD V1 **** C1MKX8_MICPS); contains Interpro domain(s) IPR016055 Alpha-D-phosphohexomutase, alpha/beta/alpha I, II and III'	Cp	1	Cp	Cp	Cp	Cp	85.1	plastid stroma	plastid	plp_at_00568; plp_at_01601; plp_at_02462	Cp	0.94	0.05	Yes	Detected by both ITAG and Atlas
Solyc03g007030	CDGSH iron sulfur domain-containing protein 1 (AHRD V1 ***- B5X1R9_SALSA); contains Interpro domain(s) IPR006622 Iron sulphur domain-containing, CDGSH-type, subfamily	-	At5g51720	NP_001309349.1	MASTTSIIQPGFSCGGALSSFTAKPRRVVMVRAQAINPDIKKDEAKVVDSVLVTELSKPLTAYCRCWRSGTFPLCDGSHVKHNKETGDNVGPLLLKKQ	2	5	2	3.642	0.0234855	400	5	2	7	'7.12.1.3.1'	'Coenzyme metabolism.iron-sulfur cluster assembly machinery.plastidial SUF system.export machinery.transfer factor *(NEET)'	'mercator4v5.0: iron-sulfur-cluster assembly transfer factor *(NEET) & swissprot: CDGSH iron-sulfur domain-containing protein NEET & original description: CDGSH iron sulfur domain-containing protein 1 (AHRD V1 ***- B5X1R9_SALSA); contains Interpro domain(s) IPR006622 Iron sulphur domain-containing, CDGSH-type, subfamily'	Cp	3	Cp	possibly Cp	Cp	M	81.4	plastid	plastid	-	Cp	1	0	No	Atlas only
Solyc03g007110	ATP-dependent Clp protease ATP-binding subunit ClpC (AHRD V1 *-*- D6KVC7_SCAIO); contains Interpro domain(s) IPR004176 Clp, N-terminal	CLPT1	At4g25370	XP_004234159.1	MATHSFSLLPIQSLTSNSSNKQSENTNTFLTHKYCKALATSFTGGKLLIRPQNLNSVTPKRRRSTVATVAFSLPITKPEGYEKQPKWSSRAIQAFVMAELEARKIKYPSTGTEALLMGILVEGTSLAAKFLRANGITFFKVSEETLKLLGKSDMYYSNPESPPLTKPARKALDWAVNEKLKSGEDGEITVTHIVLGIWSVKESAGHIIMSTLGFDDEKAKELAKFMDKDSELTYK	6	44	6	26.826	0.172988	66	5	3	8	'19.4.2.9.3'	'Protein homeostasis.proteolysis.serine-type peptidase activities.chloroplast Clp-type protease complex.plant-specific stabilizing component *(ClpT)'	'mercator4v5.0: plant-specific stabilizing component *(ClpT) of chloroplast Clp-type protease complex & swissprot: ATP-dependent Clp protease ATP-binding subunit CLPT1, chloroplastic & original description: ATP-dependent Clp protease ATP-binding subunit ClpC (AHRD V1 *-*- D6KVC7_SCAIO); contains Interpro domain(s) IPR004176 Clp, N-terminal'	Cp	2	Cp	Cp	Cp	Cp	99.4	plastid stroma	plastid	plp_at_00443; plp_at_01510; plp_at_01681; plp_at_02601	Cp	0.99	0	No	Detected by both ITAG and Atlas
Solyc03g007330	Cell division protease ftsH homolog (AHRD V1 *-*- FTSH_RICTY); contains Interpro domain(s) IPR005936 Peptidase M41, FtsH	FTSH11	At5g53170	XP_004234177.1	MTTLQASLLFKPLPPLLHFSSSKHVRSLSFANALSCRRLSTTASAPFKTRFCRHNLLLHCTLNPEQVDSSSEFALSNNDDNSIPEMEPIEFNEPSVVQIGSVQNSSIDSNAGVVSSSFSDNEAASEVLVENDELKKKLPILVFLMGVFAKVKKGFENILLSDWFSWWPFWHQEKRLERLIADADANPNDAAMQSALLAELNKHSPESVIRRFEQRAHAVDSRGVAEYMRALVATNAIAEYLPDEQSGKPSSLPSLLQELKQRASGNMDEPFLNPGISEKQPLHVVMVDPKVSNRSSRFAQEFLSTIIFTIAIGLVWIMGATALQKYIGGLGGIGASGVGSSSSYAPKELNKEIMPEKNVKTFKDVKGCDDAKQELEEVVEYLKNPSKFTRLGGKLPKGI…	1	2	1	0.077	0.000496536	1225	2	0	2	'19.4.5.8.1.1.1'	'Protein homeostasis.proteolysis.metallopeptidase activities.FtsH endopeptidase activities.FtsH mitochondrial protease complexes.i-AAA protease activities.ATP-dependent metalloprotease *(FtsH4/11)'	'mercator4v5.0: ATP-dependent metalloprotease *(FtsH4/11) & swissprot: ATP-dependent zinc metalloprotease FTSH 11, chloroplastic/mitochondrial & original description: Cell division protease ftsH homolog (AHRD V1 *-*- FTSH_RICTY); contains Interpro domain(s) IPR005936 Peptidase M41, FtsH'	Cp	2	Cp	none	Cp	ER	80	envelope	mitochondrion,plastid	-	Cp	0.81	0.1	No	Detected by both ITAG and Atlas
Solyc03g007540	Uncharacterized protien DUF3143	-	At5g52960	NP_001353345.1	MSTISATFFRSLYCIASPPPSTISRFFLPTPLLLPKFRSCPKPLTSSSRKPVACTNSSEEAEVSQTMDEWLQKLPDKTKPLYSHSLPCIEAWLRSLGFYQSRDDRALWFVENPDWQAQLSLDITELHIRYLKRGPGNLEKDVDRRFSYALSREDIENAILGGP	2	6	2	0.778	0.00501695	873	4	0	4	'35.2'	'not assigned.not annotated'	'mercator4v5.0: not classified & original description: Unknown Protein (AHRD V1)'	Cp	1	Cp	possibly Cp	Cp	Cp	95.1	plastid stroma	plastid	-	Cp	0.99	0	No	Detected by both ITAG and Atlas
Solyc03g007810	Pyruvate kinase (AHRD V1 ***- A5BTB0_VITVI); contains Interpro domain(s) IPR001697 Pyruvate kinase	PKP2	At5g52920	XP_004234211.1	MAQVVATRSIQSSFSSPSHGSLQSQVEKLKPPSLASKVLGRNERSNSCRAVRVNMPQIIARRSTRAEPQVLPVSPEDVPKSEEQEQYLQAIQQLGDTSVGMWSKPTVRRKTKIVCTIGPSTNTREMIWKLAEAGMNVARMNMSHGDHASHQKVIDLVKEYNAQSKDNVIAIMLDTKGPEVRSGDLPQPIMLKPGQEFTFTIQRGVGTADCVSVNYDDFVNDVEVGDMLLVDGGMMSLQVKSKTEESVKCEVIDGGELKSRRHLNVRGKSATLPSITEKDWDDIKFGVDNNIDFYAVSFVKDAAVVHELKNYLKSCGADIHVIVKIESADSIPNLHSIITASDGAMVARGDLGAELPIEEVPLLQEEIINICRSMGKAVIVATNMLESMIVHPTPTRAEV…	12	46	9	4.484	0.0289152	348	5	3	8	'3.12.8'	'Carbohydrate metabolism.plastidial glycolysis.pyruvate kinase'	'mercator4v5.0: pyruvate kinase & swissprot: Plastidial pyruvate kinase 2 & original description: Pyruvate kinase (AHRD V1 ***- A5BTB0_VITVI); contains Interpro domain(s) IPR001697 Pyruvate kinase'	Cp	1	Cp	Cp	Cp	Cp	95.8	plastid stroma	plastid	plp_at_02571	Cp	0.7	0	No	Atlas only
Solyc03g007980	Septum site-determining protein MinD (AHRD V1 ***- D8FVX6_9CYAN); contains Interpro domain(s) IPR010223 Septum site-determining protein MinD	MinD	At5g24020	XP_010317508.1	MLSLQPLNPKPSSLYSSTFTPPNSLSPKTLKPIPAFRPSRNFYPSIHSMLQYNRKPQLAGDTPRVVVITSGKGGVGKTTTTANIGLSLARLGFSVVAIDCDVGLRNLDLLLGLENRVNYTVVEVLNGDCRLDQALVRDKRWSNFELLCISKPRSKLPIGFGGKALVWLVDALKARDEGGPDFIIIDCPAGIDAGFITAITPANEAVLVTTPDITSLRDADRVTGLLECDGIRDIKMIVNRVRTDMIKGEDMMSVLDVQEMLGLPLLGVIPEDSEVIRSTNRGYPLVLNKPPALAGLAFEQAAWRLVEQDSMETVMMEEEPKKRGFFSFFGR	3	10	3	0.638	0.00411415	932	5	3	8	'13.5.2.1'	'Cell division.plastid division.spatial regulation.assembly factor *(MinD)'	'mercator4v5.0: plastid division FtsZ assembly factor *(MinD) & swissprot: Putative septum site-determining protein minD homolog, chloroplastic & original description: Septum site-determining protein MinD (AHRD V1 ***- D8FVX6_9CYAN); contains Interpro domain(s) IPR010223 Septum site-determining protein MinD'	Cp	1	Cp	none	Cp	Cp	100	plastid stroma; envelope-inner	plastid	-	Cp	0.95	0	No	Detected by both ITAG and Atlas
Solyc03g019660	Thylakoid lumenal 17.9 kDa protein, chloroplastic (AHRD V1 ***- TL1Y_ARATH)	TL17.9	At4g24930	XP_004234307.1	MASGISATLLPQFTVKQQNSPCYSTPNFAAEQQQCVPSIWSKVLPLAVAVSLVAPLSSSAIPSLNSKSTPVAPMTPFSQSKNLPTGLENGKIRPCPSVNPGCVSTNPQSSSSAFPLIISQNSSGNAIMQLQDAILKTQKNAKIQVVEDIPDGKYLQAEVDGGFGRDVLEFLVKGDSVAYRAMATKVTYIYPFTTAFGDSKGQEERMEMIAEELGWYAPSLDSMD	6	29	6	6.499	0.0419089	246	5	2	7	'35.1'	'not assigned.annotated'	'mercator4v5.0: not classified & swissprot: Thylakoid lumenal 17.9 kDa protein, chloroplastic & original description: Thylakoid lumenal 17.9 kDa protein, chloroplastic (AHRD V1 ***- TL1Y_ARATH)'	Cp	5	Cp	Cp	Cp	Cp	99.6	thylakoid-peripheral-lumenal-side	plastid	plp_at_00439; plp_at_01679; plp_at_01950	Thylakoid	0.27	0.7	No but known to be lumenal	Detected by both ITAG and Atlas
Solyc03g019680	CBS-CBS-PB5 protein; CBS domain containing protein (AHRD V1 ***- B6U1W0_MAIZE); contains Interpro domain(s) IPR000644 Cystathionine beta-synthase, core	CBSCBSPB5-like	At5g50640	XP_004234305.1	MTTSHGGGSLSRRSSLSLTSSTSNLKKKAAAHENGGGQPDSGTRKSMSLSRSMGLTGERTVKRLRLSKALTVPDSTSIYEACRRMAARRVDALLLTDSNALLCGILTDKDIATRVIAREVNIQETPVSKIMTKNPVFVLSDTLAVEALQKMVLGKFRHLPVVENGEVIALLDIAKCLYDAIARLERAAEKGKAIAAAVEGVEKHWGSSVSGSNTFIETLQERMFKPSLSTIISENSKVVIVEPSDTVLATAKKMLESRTSSAIVMVDNKPRGILTSKDMLMRVIAQDLSPESILVERVMTPSPECSTTDTPIVDALHTMHDGKFLHLPVVDKEGTVVAVLDVLHITHAAVSTVGQNAGPNNEAANTMMQRFWDSAMALTPDDDEETRSEGSLKLASEGA…	1	1	1	<0.038	0	1248	1	0	1	'35.1'	'not assigned.annotated'	'mercator4v5.0: not classified & swissprot: CBS domain-containing protein CBSCBSPB4 & original description: CBS domain containing protein (AHRD V1 ***- B6U1W0_MAIZE); contains Interpro domain(s) IPR000644 Cystathionine beta-synthase, core'	Cp	2	Cp	none	Cp	Cp	87.6	-	-	-	-	0.02	0	No	Detected by both ITAG and Atlas
Solyc03g019880	UPF0426 protein At1g28150, chloroplastic (AHRD V1 ***- Y1815_ARATH)	-	At1g28150	XP_004234323.1	MSMVLNCVAASPSCATRKWKPAVLGKQLPSGTSPFSVSAKTYGKFRVNAFFFNPIQEPILKEALKEPVAFAGGMFAGLLRLDLNDDPLKEWVSRTVEASGVTAKEIEAGDDQAEDTPQQIEIE	2	15	2	2.728	0.0175916	489	4	2	6	'35.1'	'not assigned.annotated'	'mercator4v5.0: not classified & swissprot: UPF0426 protein At1g28150, chloroplastic & original description: UPF0426 protein At1g28150, chloroplastic (AHRD V1 ***- Y1815_ARATH)'	Cp	4	Cp	possibly Cp	Cp	Cp	82.7	plastoglobules	plastid	-	Cp	0.96	0	No	Detected by both ITAG and Atlas
Solyc03g019940	Asparaginyl-tRNA synthetase (AHRD V1 **** D6YS69_WADCW); contains Interpro domain(s) IPR004522 Asparaginyl-tRNA synthetase, class IIb	AsnRS	At4g17300	XP_004234328.1	MAGALSPATTLRLKPFYAVRFFSHYRRPIKVLNPNFYSSYPPQLPPAPYLSRRRSFCSVVSAAISSGEAVERPKFENIEAKEGVKTEKVGEFRKRLRVADIKGGPEEGLDRLGETLVVRGWVRTVRAQSSVTFIDINDGSCLSNMQCVMGSDAEGYDQVENGLISTGASVWIEGTVVSSQGSKQKIELKVQKLVVVGKSDPSFPIQKKRVSREFLRTKAHLRPRTNTFGAVSRVRNALSYATHKFFQENGFVWVSSPIITASDCEGAGEQFCVTTLIPNSNEGGDSPVSAIPTTESGSVDWSQDFFGKRAYLTVSGQLNGETYATALSDIYTFGPTFRAENSNTSRHLAEFWMIEPELAFADLDDDMACATAYLQYVVQHVLENCKEDMDFFDTWIEKG…	13	48	13	2.162	0.0139417	569	5	3	8	'17.2.3'	'Protein biosynthesis.aminoacyl-tRNA synthetase activities.asparagine-tRNA ligase'	'mercator4v5.0: asparagine-tRNA ligase & swissprot: Asparagine--tRNA ligase, chloroplastic/mitochondrial & original description: Asparaginyl-tRNA synthetase (AHRD V1 **** D6YS69_WADCW); contains Interpro domain(s) IPR004522 Asparaginyl-tRNA synthetase, class IIb'	M	4	Cp	M	Cp	M	98.2	plastid stroma; mitochondria	plastid	-	Cp	0.97	0.02	No	Detected by both ITAG and Atlas
Solyc03g025310	Sec-independent protein translocase protein tatA/E homolog (AHRD V1 *-*- D4TUR0_9NOST); contains Interpro domain(s) IPR006312 Twin-arginine translocation protein TatA/E	TATB HCF106	At5g52440	XP_004234427.1	MAQINMSRSIFFVRPIYLQDQWRRKQYECRLAEFDSMTTSSLMASALSSSSSSLASSRRVSVTALSFSSISVTHNPKVHFFKWIPYSGLSSWNGLKQLSISKSQFSVKIGRSRKNKGKGVYASLFGVGAPEALVIGVVALLVFGPKGLAEVARNLGKTLREFQPTIRELQDVSREFKSTLEREIGLDDIKGSVQDTRNSSTMSPSSDSSYKNSVADPNGSPSPKLASTAEDDLERMMRIADAEKQAEKDLAALLESRSESQTVSQEVADNSSSSDRAYSTEEYLKISEEQLKAAAQKQSETSTPEQIPFNTQSLSQDSASSADGAYSTEDLSKAAAQQNLSSSQQSPSNAESQSQEAPGEAASMISSSTNPESET	5	29	5	1.154	0.00744159	772	5	3	8	'23.1.6.2'	'Protein translocation.chloroplast.thylakoid membrane Tat translocation system.component *(cpTatB)'	'mercator4v5.0: component *(cpTatB) of thylakoid membrane Tat translocation system & swissprot: Sec-independent protein translocase protein TATB, chloroplastic & original description: Sec-independent protein translocase protein tatA/E homolog (AHRD V1 *-*- D4TUR0_9NOST); contains Interpro domain(s) IPR006312 Twin-arginine translocation protein TatA/E'	M	5	Cp	none	Cp	C	75.9	thylakoid-integral	plastid	plp_at_00570; plp_at_01908	Thylakoid	0.16	0.46	Yes	Detected by both ITAG and Atlas
Solyc03g025410	TIC32, Dehydrogenase/reductase SDR family member 13 (AHRD V1 ***- DHR13_BOVIN); contains Interpro domain(s) IPR002347 Glucose/ribitol dehydrogenase [TIC32-like, NAD(P)-binding Rossmann-fold superfamily protein]	TIC32	At4g23430	XP_004234415.1	MWLFKRKGPSGFSSSSTAEEVTHGIDGSGLTAIVTGASSGIGSETSRVLALRGVHVIMAVRNMTSGKDVRDAIVTEIPAAKVDTMELDLSSLASVKKFASDFKSSGRPLNLLINNAGIMATPFMLSKDNIELQFATNHVGHFLLTNLLLEKMKETARKTKREGRIVNVSSEAHRFAYREGIRFDKINDPKSYNSYGAYGQSKLANILHANELTRRLKEDGVEISANSLHPGTITTNLFRHMGIFDGLVGTLGKLLLKNVQQGASTTCYLALNPQVKGVSGEYFSDNNLAKTTALAKDMDLAKRLWDFSMDLIK	5	18	5	1.894	0.0122135	619	5	3	8	'23.1.3.5.1'	'Protein translocation.chloroplast.inner envelope TIC translocation system.redox regulon complex.component *(Tic32)'	'mercator4v5.0: component *(Tic32) of inner envelope TIC translocation system & swissprot: Short-chain dehydrogenase TIC 32, chloroplastic & original description: Dehydrogenase/reductase SDR family member 13 (AHRD V1 ***- DHR13_BOVIN); contains Interpro domain(s) IPR002347 Glucose/ribitol dehydrogenase'	-	4	-	none	Cp	Cp	98.9	-	plastid,cytosol	plp_at_01096	-	0	0	No	ITAG only
Solyc03g026210	Dihydrodipicolite reductase-like protein CCR1	CCR1	At5g52100	XP_004234357.1	MAVLSCQTYFINSKKIIKTKPFICCSSSQNNNVKVIINGAAKEIGRAAVIAVTKARGMELAGAVDSNFVGQDIGQVCDMEEPLEIPIINDLTMVLGSISQLKATGVVIDFTDPSTVYDNVKQATAFGMNSVVYVPRIKQETVMALSMLCDKASTGCLVAPTLSIGSILLQQAAISASFHYNNVEIVESRANPLDFPSQDAVQIANNLSNLGQLYNRDDISSDIPARGQVLGEDGVRVHSLVLPGLPSSTSVYFSRPGEVYTLKHDITDVQCLMPGLILAIRKVVRLKNLVYGLEKFL	4	10	4	1.783	0.0114977	638	4	2	6	'1.1.8.1.6.3'	'Photosynthesis.photophosphorylation.chlororespiration.NADH dehydrogenase-like (NDH) complex.assembly and maintenance.assembly factor *(CRR1)'	'mercator4v5.0: assembly factor CRR1 involved in NDH complex assembly & swissprot: Dihydrodipicolinate reductase-like protein CRR1, chloroplastic & original description: Dihydrodipicolinate reductase family protein (AHRD V1 ***- D7MRM8_ARALY); contains Interpro domain(s) IPR011770 Dihydrodipicolinate reductase, bacterial and plant'	Cp	5	-	possibly Cp	Cp	Cp	98.6	plastid stroma	plastid	-	Cp	0.5	0.31	No	Detected by both ITAG and Atlas
Solyc03g026310	ABC transporter permease/ATP-binding protein B family (AHRD V1 ***- A6ANR0_VIBHA); contains Interpro domain(s) IPR001140 ABC transporter, transmembrane region	ABCB20	At4g25450	NP_001353317.1 Ofori et al 2018 Andolfo et al 2015	MATVPNTFWGLPLTPFPIQRRRNHRLVLLRSNGPSQFSISTAQPFRSQFVNCRKLKRSVVSSAYITGPAFDAFVSESDPKFEESDDSLVAVQPIEVIRWGFIWKLVSRHKLKLLASVFSLVICTTCSLSLPLLSGRFFEVLIGTRTDPLLELLSKVALLYTLEPIFTIIYVANITSIWEKVMSSLRAQIFRRVLIQKIDFFDRYKVGELTALLTSDLGSLKNIVSENTSRDRGFRALSEVVGTLSLLFALSPQLAPILGLLILAVSILVALFKRSTVNVFQAHGLVQASIADSVTESFSAIRTVRSFSGEKRQMSVFARQVLEFESSSIKIGTFKSFHESVTRVAIYISLMALYCLGGSKVKAGELSVGIMASFIGYTFTLTFAVQGLVNTFGDLRAAL…	1	3	1	0.096	0.000619058	1209	3	3	6	'24.1.3.1.1'	'Solute transport.primary active transport.ABC superfamily.ABC1 family.subfamily ABCB transporter'	'mercator4v5.0: subfamily ABCB transporter & swissprot: ABC transporter B family member 28 & original description: ABC transporter permease/ATP-binding protein (AHRD V1 ***- A6ANR0_VIBHA); contains Interpro domain(s) IPR001140 ABC transporter, transmembrane region'	Cp	3	Cp	Cp	Cp	PM	86.4	envelope-inner-integral	plastid	plp_at_01098; plp_at_01511	Cp	0.96	0.02	No	Detected by both ITAG and Atlas
Solyc03g026320	ABC transporter I family B member; Lipid A export ATP-binding_permease protein MsbA	ABCB30	At4g25450	NP_001353549.1 Andolfo et al 2015	MDFLQGSRKARRLDFLSRDYVLSFLVLLEAYLIMFYPSWKVDMNSRCSLGVMLLLVMVVFHNYSPHNLPPKKKLNSVDQIGCGKTPNLNATSALDTISERLVQEALDHLMKGRTTLVIAHRLSTVQNADQIALCSDGKIAELGTHLELLERKGQYASLVDTQRLHDTVH	1	1	1	0.233	0.0015025	1098	1	2	3	'35.1'	'not assigned.annotated'	'mercator4v5.0: not classified & swissprot: ABC transporter B family member 28 & original description: Lipid A export ATP-binding/permease protein MsbA (AHRD V1 *-*- A4BMK8_9GAMM)'	M	4	-	none	not Cp	M	94.71	envelope-inner-integral	plastid	plp_at_01098; plp_at_01511	-	0	0	No	Detected by both ITAG and Atlas
Solyc03g026330	Uncharacterized conserved protein (AHRD V1 *-*- Q7VAI6_PROMA)	-	At5g62140	XP_004234348.1	MGSQIYSSTPQFSCQFPKIKSRQISSYSSVQLKPRISIISCQQQPQSTGVVTETPVPRTAIYNVDFKTFEDCKLGISRYPDFVYNAQGGTGTGTGKRIESSDEISIDFDLEKLYIPPLTSATAKFLGLPLPPFLKIDVEPELLRGYVNQETG	3	13	3	1.154	0.00744159	773	5	3	8	'35.2'	'not assigned.not annotated'	'mercator4v5.0: not classified & original description: Uncharacterized conserved protein (AHRD V1 *-*- Q7VAI6_PROMA)'	Cp	3	Cp	Cp	Cp	Cp	99.9	plastid	plastid	-	Cp	0.83	0.08	No	Detected by both ITAG and Atlas
Solyc03g031700	ABC transporter FeS assembly protein SufB (AHRD V1 ***- C7JBP7_ACEP3); contains Interpro domain(s) IPR010231 SUF system FeS cluster assembly, SufB	ABCI8 NAP1	At4g04770	XP_004234480.1	MASLVTNGISCFSPQPITEQPKLSKGSQFLLKLANPRNPNSRILKVKAAELSYEATIDSPGKESSVSTSNENDPLQKFLKRDYKWGFNQEIDSFSLPKGLSAETVKLISGRKNEPNWMLEFRLKSYEKFLKMKEPKWSDNRYPEISFQDICYYSEPKKKPTLNSLDEADPELIKYFDKLGVPLNERNRLANVAVDAVLDSVSIATTHRKTLEKAGVIFCSISEAIREYPDLVKKYLGRVVPPEDNFYAALNSAVFSDGSFVYIPKNTRCPMQISTYFRINAMETGQFERTVIIAEEGSFVEYLEGCTAPSYDTNQLHAAVVELYCHEGAEIKYSTVQNWYAGDEEGRGGIYNFVTKRGICAGARSKISWTQVETGSAITWKYPSVVLEGDESVGEFYSV…	6	12	4	0.778	0.00501695	874	3	2	5	'7.12.1.1.1.1'	'Coenzyme metabolism.iron-sulfur cluster assembly machinery.plastidial SUF system.assembly phase.SUF-BCD scaffold complex.component *(SUF-B)'	'mercator4v5.0: component *(SUF-B) of plastidial SUF system assembly phase & swissprot: UPF0051 protein ABCI8, chloroplastic & original description: ABC transporter FeS assembly protein SufB (AHRD V1 ***- C7JBP7_ACEP3); contains Interpro domain(s) IPR010231 SUF system FeS cluster assembly, SufB'	Cp	2	Cp	Cp	Cp	Cp	70.6	plastid	plastid	-	Cp	1	0	No	Detected by both ITAG and Atlas
Solyc03g034170	Uncharacterized conserved membrane protein (AHRD V1 *--- A5GSC9_SYNR3). Similar to to At Acclimation of photosynthesis to the environment 1	-	At5g38660	XP_004234564.1	MVKTVAAMRGAGGTLFCSQSFAVFNNTQIHAQIRPSLPLTLPPLVHKLTTFSNQDSILAKTQYRLRLKVVTKAADSSQPTSAITSSGNAIVPDEEFSLAKVSFGVIGLGLGVSLLSYGFGAYFNILPGSEWSAIMLTYGFPLAIIGMALKYAELKPVPCLTYADAELLREKCATPVLKQVRSDVIRYRYGDEQHLDEALKRIFQFGLGGGIPRRSAPILQNIREEVTEDGKYCLVLVFEAKALQLSDFEKRQAKFTSFFGPGISSEIVKGENDLYEVRLISNTTL	4	6	4	1.154	0.00744159	774	3	3	6	'1.1.1.5.5.2'	'Photosynthesis.photophosphorylation.photosystem II.photosynthetic acclimation.acclimation factor activities.acclimation factor *(APE)'	'mercator4v5.0: photosynthetic acclimation APE acclimation factor & original description: Uncharacterized conserved membrane protein (AHRD V1 *--- A5GSC9_SYNR3)'	M	5	Cp	M	Cp	PM	93	thylakoid	plastid	plp_at_00547; plp_at_01899	Cp	0.77	0	No	Detected by both ITAG and Atlas
Solyc03g034190	Ribosomal protein PSRP-3/Ycf65 (AHRD V1 *-*- B5W261_SPIMA); contains Interpro domain(s) IPR006924 Ribosomal protein, PSRP-3/Ycf65	PSRP3-2 YCF65-2	At5g15760	XP_004234566.1	MMLSMATQLTVNWVPAFSSQNQFFSPKFVFFTKGQSFSRRSNVSAIVPRRNLGGFATSAAAALSFAEETSTRDSISSDSLQKEKLGVLVKPLEKPRLVLKFIWMEKNIGISLDQVIPGHGTIPLSPYYFWPRKDAWEELKVMLESKPWISQKQAIILLNQATDIINLWQQSGGDLA	5	23	3	4.623	0.0298115	339	5	3	8	'17.6.2.3.23'	'Protein biosynthesis.organelle machinery.plastidial ribosome biogenesis.small ribosomal subunit proteome.component *(cS23)'	'mercator4v5.0: component *(cS23) of small plastid ribosomal-subunit proteome & swissprot: 30S ribosomal protein 3, chloroplastic & original description: Ribosomal protein PSRP-3/Ycf65 (AHRD V1 *-*- B5W261_SPIMA); contains Interpro domain(s) IPR006924 Ribosomal protein, PSRP-3/Ycf65'	Cp	2	Cp	Cp	Cp	Cp	99.9	plastid ribosome	plastid	-	Cp	0.82	0.17	No	Detected by both ITAG and Atlas
Solyc03g034220	Ribulose bisphosphate carboxylase small chain (AHRD V1 ***- A9YTZ7_SOLTU); contains Interpro domain(s) IPR000894 Ribulose bisphosphate carboxylase, small chain	RBCS-2A	At5g38410	NP_001295873.1	MASSVISSAAVATRSNVTQASMVAPFTGLKSSATFPVTKKQNLDITSIASNGGRVSCMQVWPPINMKKYETLSYLPDLSDEQLLSEIEYLLKNGWVPCLEFETEHGFVYRENNKSPGYYDGRYWTMWKLPMFGCTDATQVLAEVQEAKKAYPQAWVRIIGFDNVRQVQCISFIAYKPEGY	8	216	1	11.589	0.0747319	140	4	3	7	'1.2.1.1.2'	'Photosynthesis.calvin cycle.ribulose-1,5-bisphosphat carboxylase/oxygenase (RuBisCo) activity.RuBisCo heterodimer.small subunit'	'mercator4v5.0: small subunit of ribulose-1,5-bisphosphat carboxylase/oxygenase heterodimer & swissprot: Ribulose bisphosphate carboxylase small subunit, chloroplastic 2 & original description: Ribulose bisphosphate carboxylase small chain (AHRD V1 ***- A9YTZ7_SOLTU); contains Interpro domain(s) IPR000894 Ribulose bisphosphate carboxylase, small chain'	Cp	2	Cp	Cp	Cp	Cp	100	plastid stroma	plastid	plp_at_00545; plp_at_02355	Cp	0.98	0	No	ITAG only
Solyc03g043750	Alternative NAD(P)H-ubiquinone oxidoreductase C1, chloroplastic/mitochondrial	NDC1	At5g08740	XP_004234639.1	MNQLLPPLHQKNPIASMEFTLASSASAKTALLSCRQMGLGSPKLPNVWRRSSWRSRSSRRNTSLRTVAMSTTAGLVNNMEAPEANAQNVNYMWPDKKRPRICIIGGGFGGLYTALRLESLVWPDDKKPQVVLIDQSERFVFKPLLYELLSGEVEAWEIAPQFSDLLANTGVRFFKDRVKCLYPCDHLGTNAPTAGTVHLESGLLIEYDWLVLAIGAEAKLDIVPGAADYALPFYTLEDAHRVDKKLRELERKNFGKDSAIRVAVVGCGYGGVELAATISERLQQKGIVQAINVDKTILSNAPAGNREAALKVLSSRKVQLILGYFVRCITKGNEPQTDAEPGSIDSAADHSESVTLELQPAERGLQGQTIRADIVLWTIGSKPLLPQLEPSDKPYDIPL…	6	17	6	1.069	0.00689347	801	5	2	7	'2.4.2.1.3'	'Cellular respiration.oxidative phosphorylation.alternative NAD(P)H dehydrogenase activities.type-II NAD(P)H dehydrogenase activities.NAD(P)H dehydrogenase *(NDC)'	'mercator4v5.0: NAD(P)H dehydrogenase *(NDC) & swissprot: Alternative NAD(P)H-ubiquinone oxidoreductase C1, chloroplastic/mitochondrial & original description: FAD-dependent pyridine nucleotide-disulphide oxidoreductase (AHRD V1 ***- A0YND6_LYNSP); contains Interpro domain(s) IPR013027 FAD-dependent pyridine nucleotide-disulphide oxidoreductase'	Cp	2	Cp	none	Cp	C	40.9	plastoglobules; mitochondria	mitochondrion,plastid	-	Cp	0.79	0.04	No	Detected by both ITAG and Atlas
Solyc03g043880	Branched-chain amino acid aminotransferase (AHRD V1 **** Q9SNY9_SOLTU); contains Interpro domain(s) IPR005786 Branched-chain amino acid aminotransferase II	BCAT	At5g65780	XP_004234645.1	MESGGVLAGLHRNPTCHHLLRPPRAAVNNLLSSSSFTDKRHFSPLPLKFQKQSHFASYSCNCSINDGSAFQVASSASATAELANIDWDNIGFAVMPTDYMYSMKCSQDGNFSKGELQRFGNIELSPASGILNYGQGLFEGLKAYKRHDGNILLFRPEENALRMKMGAERICMPSPSVEQFVEAVKATVLANERWIPPPGKGSLYIRPLLMGSGAILGVAPAPEYTFLIYVSPVGNYFKEGMAPINLLIETEMHRATPGGTGGVKTIGNYAAVLKAQSAAKAKGYSDVLYLDSVNNRYLEEVSSCNVFIVKGNLIATPAIKGTILPGITRKSIIDVALSQGFQVEERQVSVDELLDADEVFCTGTAVVVSPVGSITHLGKRVSYGSDGVGRVSKQLYSTL…	5	14	1	0.833	0.00537162	855	3	0	3	'4.2.2.8.6'	'Amino acid metabolism.aspartate group amino acid biosynthesis.aspartate-derived amino acids.isoleucine.valine/leucine/isoleucine aminotransferase'	'mercator4v5.0: valine/leucine/isoleucine aminotransferase & swissprot: Branched-chain amino acid aminotransferase 2, chloroplastic & original description: Branched-chain amino acid aminotransferase (AHRD V1 **** Q9SNY9_SOLTU); contains Interpro domain(s) IPR005786 Branched-chain amino acid aminotransferase II'	Cp	5	Cp	possibly Cp	Cp	Cp	89	plastid	plastid	-	Cp	0.7	0.06	No	Detected by both ITAG and Atlas
Solyc03g044190	FAD-dependent oxidoreductase IPR006076 FAD dependent oxidoreductase	-	At5g67290	XP_004234658.1	MDTNPQPKKVAVCGGGVIGVCTAYFLSKNGASVTLIEQSSVACAASGKAGGFLALDWCDGGPVASLARASFNLHRSLAQELNGSESYGYRPLTTLSVSITESSSSSSNRTGPIPSWVDGPAKSPRTIGSTDSTAQVHPEMFTKRLLSKAMEDYGVELVIGKVERVEMAEGKTRGVVLEDGREIDAAAIVLAVGPWSKRFSILGSLFRVYGIKAHSIVLEPKEANRITPHALFLTYYPAQGGKPMDPEVYPRPTGEVYICGMSAQAEVPDDPEQITPVPESINTLKRVASSVSSHLVEGEATVKAEQACILPCSEDDVPIIGEVPGVEGCYVATGHSCWGILNGPATGAAMAELILDGRASIVDLSRFSPARFASAVKK	1	1	1	0.155	0.00099952	1163	1	0	1	'35.2'	'not assigned.not annotated'	'mercator4v5.0: not classified & original description: FAD-dependent oxidoreductase (AHRD V1 **-- A8ISJ7_CHLRE); contains Interpro domain(s) IPR006076 FAD dependent oxidoreductase'	-	2	-	none	Cp	Cp	61.36	plastid	plastid	-	-	0	0	No	Detected by both ITAG and Atlas
Solyc03g044330	Acetolactate synthase (AHRD V1 **** D7RPJ7_SOLTU); contains Interpro domain(s) IPR012846 Acetolactate synthase, large subunit, biosynthetic	ASS2	At3g48560	XP_004234664.1	MAAAASPSPCFSKTLPPSSSKSSTILPRSTFSFHNHPQKASPLHLIHAQHNRRGFAVANVVISTTTHNDVSEPETFVSRFAPDEPRKGCDVLVEALEREGVTDVFAYPGGASMEIHQALTRSNIIRNVLPRHEQGGVFAAEGYARATGFPGVCIATSGPGATNLVSGLADALLDSIPIVAITGQVPRRMIGTDAFQETPIVEVTRSITKHNYLVMDVEDIPRVVREAFFLAKSGRPGPVLIDVPKDIQQQLVIPNWDQPMRLPGYMSRLPKLPNEMLLEQIVRLISESKKPVLYVGGGCSQSSEELRRFVELTGIPVASTLMGLGAFPTGDELSLQMLGMHGTVYANYAVDSSDLLLAFGVRFDDRVTGKLEAFASRAKIVHIDIDSAEIGKNKQPHVS…	9	28	1	2.3	0.0148316	551	5	3	8	'4.2.2.8.3.1'	'Amino acid metabolism.aspartate group amino acid biosynthesis.aspartate-derived amino acids.isoleucine.acetolactate synthase complex.catalytic component'	'mercator4v5.0: catalytic component of acetolactate synthase complex & swissprot: Acetolactate synthase 2, chloroplastic & original description: Acetolactate synthase (AHRD V1 **** D7RPJ7_SOLTU); contains Interpro domain(s) IPR012846 Acetolactate synthase, large subunit, biosynthetic'	Cp	1	Cp	Cp	Cp	Cp	100	plastid stroma	plastid	-	Cp	0.95	0.05	No	Detected by both ITAG and Atlas
Solyc03g044470	Red chlorophyll catabolite reductase (Fragment) (AHRD V1 **** Q1ELT8_SOLLC); contains Interpro domain(s) IPR009439 Red chlorophyll catabolite reductase (ACD2)	RCCR ACD2	At4g37000	XP_004234668.1	MAVPLSSAKFHTSILTQSLPSSSSRSFSVGKRFCCSSSSTSMEHHESKFKEFPYASVPHRELMVELVSTVENRLGESLLPCTLPSHVQYFENESATAHASLYVRSGNSSSQVDFILGSWVHCNLPTGGALNITSLSVYLRPSTDAPNFLIEVIQSSPTTLILILDLPPRKDLVQHPDYLKTFYEETQLDKQRQLLEKLPEVKPYFSSSLYIRALVSPSAILVSIETDPSQAIRIDEIIQDHISPVAKVMLDTWLNLCACTERRLTDDESKDLAKRDQIIKNKTIEIDLESSFPRLFGQQVANQVLGVLREIYNS	7	38	7	5.105	0.0329197	317	5	3	8	'7.15.3.3.4'	'Coenzyme metabolism.chlorophyll metabolism.chlorophyll catabolism.PAO-phyllobilin pathway.red chlorophyll catabolite reductase *(RCCR)'	'mercator4v5.0: red chlorophyll catabolite reductase *(RCCR) & swissprot: Red chlorophyll catabolite reductase, chloroplastic & original description: Red chlorophyll catabolite reductase (Fragment) (AHRD V1 **** Q1ELT8_SOLLC); contains Interpro domain(s) IPR009439 Red chlorophyll catabolite reductase'	Cp	1	Cp	Cp	Cp	Cp	100	thylakoid; mitochondria	plastid	plp_at_01528; plp_at_02552	Cp	0.53	0.08	No	Detected by both ITAG and Atlas
Solyc03g044630	Conserved domain protein (AHRD V1 *-*- B4WN95_9SYNE); contains Interpro domain(s) IPR005500 Protein of unknown function DUF309	-	At2g41120	XP_004234729.2	MANNISINLPKFNQTLISFTNISSLSNFPYSKIHLHSQLYHRQFKVTNYTSPSSYTYRLFSRRSFMEDEDDHKSKNYSFQEAVRLFNSRDYYRCHDVVEALWTESQEPIRSLLHGILQCAVGFHHLFNKNHKGAMMELGEGVCKLRKFNFENGPFYEFEKEISQVLDFIYATQIEVAACGDDICVTMDQSERSYQLLGGFAAGQQLYTLVTEQHDYCYIVFSYPKYDENVQQLRIKLPTINASEQNLKELEYS	1	3	1	0.292	0.00188297	1067	3	0	3	'35.2'	'not assigned.not annotated'	'mercator4v5.0: not classified & original description: Conserved domain protein (AHRD V1 *-*- B4WN95_9SYNE); contains Interpro domain(s) IPR005500 Protein of unknown function DUF309'	Cp	4	Cp	possibly Cp	Cp	Cp	88.4	-	-	-	-	0.35	0.01	No	Detected by both ITAG and Atlas
Solyc03g044660	Dihydrodipicolite synthase 2 (AHRD V1 **** D7LCJ3_ARALY); contains Interpro domain(s) IPR005263 Dihydrodipicolite synthase subfamily	DHDPS2	At3g60880	XP_004234671.1	MSSSITSCCHFYVERAGTTNRRNATWKSPRAAVIPSIHLPMRSNEVKNRTFAEDIKKLRLITAIKTPYLPDGRFDLEAYDALVNLQIENGVEGVIVGGTTGEGQLMSWDEHIMLIGHTINCFGGSIKVIGNTGSNSTREAIHATEQGFAVGMHAALHINPYYGKTSIEGLISHFDSVLPMGPTIIYNVPSRTGQDIPPHVIQALAKSPNLAGVKECVGNDRVEQYTRNGLVVWSGNDDECHDSRWHHGATGVISVTSNLVPGLMRELMFGGNNPVLNSKLMPLVEWLFHEPNPIALNTALAQLGVVRPVFRLPYVPLTKAKREEFVKIVEKIGRENFIGERDVQVLDDNDFFLVGRY	4	12	4	1.054	0.00679674	803	5	3	8	'4.2.2.3.1'	'Amino acid metabolism.aspartate group amino acid biosynthesis.aspartate-derived amino acids.lysine.hydroxy-tetrahydrodihydrodipicolinate synthase'	'mercator4v5.0: hydroxy-tetrahydrodihydrodipicolinate synthase & swissprot: 4-hydroxy-tetrahydrodipicolinate synthase, chloroplastic & original description: Dihydrodipicolinate synthase 2 (AHRD V1 **** D7LCJ3_ARALY); contains Interpro domain(s) IPR005263 Dihydrodipicolinate synthase subfamily'	Cp	2	-	Cp	Cp	Cp	100	plastid	plastid	-	Cp	0.49	0.05	No	Detected by both ITAG and Atlas
Solyc03g058190	Elongation factor family GTP-binding protein (AHRD V1 **** Q67QM4_SYMTH); contains Interpro domain(s) IPR006298 GTP-binding protein TypA	EF-typeA SVR3-like	At5g13650	XP_004234769.1	MEMSMASTTPCFSLPKKTFCISTPLLKKQLFGTTLPGCLSAKLPLKLNPIHTSIKCAVSEATQAPSALEKKSQLMRRSDIRNIAIVAHVDHGKTTLVDSMLKQAKVFRDNQFVQERIMDSNDIERERGITILSKNTSITYKDTKINIIDTPGHSDFGGEVERILNMVEGVLLVVDSVEGPMPQTRFVLKKALEFGHAVVVVVNKIDRPSARPEFVVNSTFELFIELNATDEQCDFQVIYASGIKGKAGLSPENLGEDLGSLFEAVIRCIPGPKINKDGALQMLATNIEYEEHKGRIAIGRVHAGSLRRGMDVKICTSEDACRFGRVSELFVYEKFSRVPAETVEAGDICAVCGIDDIQIGETIADKSDGKPLPSIKVEEPTVKMSFSVNTSPFVGREGK…	7	15	7	0.812	0.0052362	861	5	1	6	'35.1'	'not assigned.annotated'	'mercator4v5.0: not classified & swissprot: Putative elongation factor TypA-like SVR3, chloroplastic & original description: Elongation factor family GTP-binding protein (AHRD V1 **** Q67QM4_SYMTH); contains Interpro domain(s) IPR006298 GTP-binding protein TypA'	Cp	5	Cp	Cp	Cp	C	50.1	plastid stroma	plastid	plp_at_02557	Cp	0.99	0	No	Detected by both ITAG and Atlas
Solyc03g058860	3-dehydroquite synthase (AHRD V1 ***- B4FYZ3_MAIZE); contains Interpro domain(s) IPR002812 3-dehydroquite synthase, prokaryotic-type	-	At3g28760	XP_004234776.1	MDILLPSLSHSFPKFAGKRQNCRKFLGINRVARMCAFTPSNSKKKTVWIWTENKQVMTAAVEGGWNTFIFPSNRQDLALEWSSIAVIHPVFIKEGRLIDHEHKSVAAFAEISSPQQLEQFQISEEQSDKVVVNLLDWQVIPAENIVAAFQGTQTTVLAVSKNQSEAQAFLEALEHGLGGVVMKVEDVGAILELKGYFDRRREVDSLLNLTKAIITHIQVTGMGDRVCVDICSLMRPGEGLLVGSFARGLFLVHSECLESNYISSRPFRVNAGPVHAYVAVPGGKTSYLSELKSGKEVIVVDQRGMQRTAIVGRVKVETRPLILVEAKVESENESYSILLQNAETVGLVSPLHGEGHQRTTIPVTSLEVGSEVLLLLQGGARHTGIEIKEFIVEK	7	27	7	2.415	0.0155732	540	5	3	8	'35.2'	'not assigned.not annotated'	'mercator4v5.0: not classified & original description: 3-dehydroquinate synthase (AHRD V1 ***- B4FYZ3_MAIZE); contains Interpro domain(s) IPR002812 3-dehydroquinate synthase, prokaryotic-type'	Cp	3	Cp	none	Cp	C	77	-	plastid	-	Cp	0.79	0.02	No	Detected by both ITAG and Atlas
Solyc03g059180	Rhodanese/Cell cycle control phosphatase superfamily protein (TAIR)	-	At3g59780	XP_010317888.1	MATLPVCSATACSSSHSQIPFYGGLRSFSSCWKTYQLKCNVVDLSTSFHLNGPSFRGQSPIFLYSQFVQNSSLSSSSDSICTSCQNVIYSVNRELLTSDARSNSTGNLKFVDSSAVPVGREEMMGFNDDLVNIANFSPESANLESITTVDLTQGNPASILDSMDLETSSLSNVKSSALDVLSQVNKSITGSVENGQSYLNSSLDGISSSVTSAVRGATQAVDDVISKLTSTVDKTGDSAGNGVAAFSTGLKEVSGRVGLLAIDGLRHIILIFEDLVSRGATLVVFSYGSVKEVLPMEVQDLLNVSEERAVKLLTPFGTALGQGYVALEGLERSLGLDPSDPIIPFILFLGVSTAFWAFYWKLTYGGYAGDLSPKSSFELLKGDRKAVLIDIRPEDLREK…	1	1	1	0.116	0.000748028	1191	1	0	1	'35.2'	'not assigned.not annotated'	'mercator4v5.0: not classified & original description: Extracellular calcium sensing receptor (AHRD V1 *-*- C7BCU7_LIQFO); contains Interpro domain(s) IPR001763 Rhodanese-like'	Cp	4	Cp	Cp	Cp	Cp	73.8	thylakoid	plastid	-	Cp	0.6	0.06	No	Detected by both ITAG and Atlas
Solyc03g059260	Carboxyl-terminal-processing protease (AHRD V1 ***- B6T6L2_MAIZE); contains Interpro domain(s) IPR004447 Peptidase S41A, C-terminal protease	CTPA3	At3g57680	XP_010317889.1	METLCSNINVGSSISKPSFCYRFPSLTHRRGAACRRKELIPISLVGENDQNLVKCIGKGVIGLAAATVLSFSSYSPAFAQSLTVAFPVSHTPEVNTVQRTLIEAWSLIRETFVDPTFNHQDWDLKLQQTMVEMFPLRSEDAAYSKVRGMLSTLGDPYTRIISPKEYQSFRIGSDGNLQGVGLFVSVEPNTGHLVVLSCVENSPAARAGIHEGDELLEINGERLDGVDSETAAQKLRGRAGTTVTVKVHRDIGAGVSSYQEVKLPREVIKLSPVSSTIIPHKMPDGRLLKTGYVKLSSFSQSAAMEMENTIQDMENQGVESYILDLRNNPGGLVTAGLDVAQIWLDGDETLVNTVDRDGNMAPISMVNGHAVTHDPLVVLVNEGSASASEILAGALHDNG…	2	4	2	0.389	0.00250847	1025	4	0	4	'18.11.3.3'	'Protein modification.targeting peptide maturation.plastid.carboxy-terminal processing peptidase *(CtpA)'	'mercator4v5.0: carboxy-terminal processing peptidase *(CtpA) & swissprot: Carboxyl-terminal-processing peptidase 3, chloroplastic & original description: Carboxyl-terminal-processing protease (AHRD V1 ***- B6T6L2_MAIZE); contains Interpro domain(s) IPR004447 Peptidase S41A, C-terminal protease'	Cp	5	-	none	Cp	C	50.9	thylakoid-peripheral-lumenal-side	-	-	Thylakoid	0.09	0.91	No but known to be lumenal	Detected by both ITAG and Atlas
Solyc03g062710	NDH-Dependent cyclic electron flow 5	NDF5	At1g55370	XP_004234805.1	MATINTSLLSPNIILGSLISRSPSKSISAFPTPPLCSPLHYSCLTRNTQLPGVASISYPPVDMEYLESEFSGHGVTFTEVNESCVVRMALENGSIANLMLPSGLITSYKAQMWHGGTMELLHTTVSEGQNGSPVIEGGVSLACNCENDQGFSWSPSSWALHQVKGDPQGSIQVELICTSSDGKIEAKYMVTLQEDLLTSEIKIFNLGMASFRMTGSVLSHLTVSTPEASYAVGLQGSDFFSNPPFLANFSIVPPAFGKTKNQPSKKSFGEIFSSWGTKNQNPEKIAEKELEGEETDNYKHLTDEMSKIYRSAPRNFTLIDRGRRNSVVVGRDGFKEVYLLSPGSRHESYGRYSYICVGQAALLQPIIIESQSEWRGKQSLHNPNM	2	3	2	0.468	0.00301791	992	3	0	3	'1.1.8.1.6.7'	'Photosynthesis.photophosphorylation.chlororespiration.NADH dehydrogenase-like (NDH) complex.assembly and maintenance.assembly factor *(NDF5)'	'mercator4v5.0: assembly factor NDF5 involved in NDH complex assembly & swissprot: Protein NDH-DEPENDENT CYCLIC ELECTRON FLOW 5 & original description: Aldose 1-epimerase family protein expressed (AHRD V1 **-- Q10CW2_ORYSJ); contains Interpro domain(s) IPR011013 Glycoside hydrolase-type carbohydrate-binding'	Cp	1	Cp	Cp	Cp	Cp	99.7	thylakoid	-	-	Cp	0.99	0	No	Detected by both ITAG and Atlas
Solyc03g062720	Photosynthetic NDH subunit of subcomplex B 2, chloroplastic	PNSB2 NDH45 NDF2	At1g64770	XP_004234806.1	MAAAAVLSLSLPKLNNAIKASSGSSSSTTTFAPESLEEKFGRKGIKFSDGGTVELTVRNGSSVKLQIPNAHITSYKPKVYWKDDGFEEVLYTLPNSRGGIALVINEILEPNPKLPVPKTTTPSDQWTLTDVDSDSIDALQVELSCSRGSLDINYVVSLYPLSIATAVILKNNGRKPVKLTTAILSHLMSKTRKGTGIQGLRSCTYCTHPPLSSSFEILSPGEAMKTEEPGMFSFGWEPENKPGIWSTQDVPITVLKHKLSRLYSVPPQEKAKDFYNSIPSKYETIDQGRELFFRIIRLGFEDIYVSSPGSFSEKYGKDYFICTGPASMLVPLVINPGEEWRGAQVIEHDNL	4	37	4	4.179	0.0269484	363	5	3	8	'1.1.8.1.3.2'	'Photosynthesis.photophosphorylation.chlororespiration.NADH dehydrogenase-like (NDH) complex.subcomplex B.component *(PnsB2/NDF2)'	'mercator4v5.0: component *(PnsB2/NDF2) of NDH subcomplex B & swissprot: Photosynthetic NDH subunit of subcomplex B 2, chloroplastic & original description: Galactose mutarotase-like (AHRD V1 **-- A2Q5N9_MEDTR); contains Interpro domain(s) IPR011013 Glycoside hydrolase-type carbohydrate-binding'	Cp	2	Cp	Cp	Cp	Cp	96.9	thylakoid	plastid	plp_at_00126	Cp	0.55	0	No	Detected by both ITAG and Atlas
Solyc03g062790	probable plastid-lipid-associated protein 13	FBN7A	At2g42130	XP_004234807.1	MATSLQNLVPPFSCRRTTYTSPCTPIAIFRGGRRRNARKMLRVCRAMVEKTVQGASSTFAKEMERLSAKESLLLAFKDAGGFEALVTGKTTDVQCIDVNERIISLEKLNPTPRPSTSPNLEGRWNFEWFGAGSPVLLLAKIFFGRIPPTLANLSKLDVLIKDGCGTATAQVKILNSIENKFIISTKYSVEGPLRMKEEYVEGEFESPKVDEEAVPEQLRGAFGQAFNTLQQLPVPIRDAVSSGMKVSLSGTFQRLILISYLDDEILIIRNTAGEPEVLTRLEAGPDPQNITEYES	15	101	15	6.406	0.0413092	251	5	3	8	'5.9.3'	'Lipid metabolism.plastoglobule-associated activities.Fibrillin plastoglobule core protein *(FBN7)'	'mercator4v5.0: Fibrillin plastoglobule core protein *(FBN7) & swissprot: Probable plastid-lipid-associated protein 13, chloroplastic & original description: cDNA clone 002-130-C06 full insert sequence (AHRD V1 **-- B7F0E5_ORYSJ)'	Cp	2	Cp	Cp	Cp	Cp	48.1	plastoglobules	plastid	plp_at_01645	Cp	1	0	No	Detected by both ITAG and Atlas
Solyc03g062830	Nudix hydrolase 23 (AHRD V1 *-*- B6TED1_MAIZE); contains Interpro domain(s) IPR000086 NUDIX hydrolase domain	NUDX23	At2g42070	XP_004234808.1	MLKAIQIVGSSSGFASYRFRKPQPNSAFSLISRKPILTTSETLLLPASQLHSHKSCFRDFRMSSTHSKSSSSSSVAVQSTGNIRKINFCQFCGGPNKHEIPDGEEKVRAICTHCGKITYENPKMVVGCLIEHDKKILMCRRKIHPSYGLWTLPAGYMEIGESAAEGAIRETWEEANAEVEVQSLFAQLDIPLIGQTYMIFLAKLKNPHFSPGPESSECQLFELDDIPFDSLAFSSMLVSLNLYIEDIKVGRPKFHYGVINKRPGTSPSDIHAYTLDFHMQS	1	7	1	0.259	0.00167017	1082	3	2	5	'7.10.12'	'Coenzyme metabolism.FMN/FAD biosynthesis.FAD pyrophosphatase'	'mercator4v5.0: FAD pyrophosphatase & swissprot: Nudix hydrolase 23, chloroplastic & original description: Nudix hydrolase 23 (AHRD V1 *-*- B6TED1_MAIZE); contains Interpro domain(s) IPR000086 NUDIX hydrolase domain'	Cp	1	Cp	M	Cp	M	59.5	plastid stroma	plastid	-	Cp	0.37	0.01	No	Detected by both ITAG and Atlas
Solyc03g063110	Acyl-Acyl carrier protein (ACP) desaturase 5	AAD5	At3g02630	XP_004234817.1	MALNFNPPTFQSIQTTRRPCSPLRSHRVLMASTLRPPSVEGGNVKKPFSPPREVHVQVTHSMPPEKREIFDSLQGWAENNILVHLKPVEKCWQASDFLPDPASEGFEDQVKELRERCKEIPDDYFVVLVGDMITEEALPTYQTMINTLDSVRDETGASLTPWAIWTRAWTAEENRHGDLLNKYLYLSGRVDMRQIEKTIQYLIGSGMDPRTENNPYLGFIYTSFQERATFISHGNTARHAKEHGDMKLAQVCGIIAADEKRHETAYTKIVEKLFEVDPDGTVMAVADMMRKKISMPAHLMYDGRDDNLFEHFSAVAQRLGVYTAKDYADILEFLVGRWEIEKLTGLSGEGHKAQDYVCGLAPRIRKLEERAQARAKQKAPVPFSWVFGKDIKL	4	34	1	0.874	0.00563601	844	5	3	8	'5.1.7.2.1'	'Lipid metabolism.fatty acid metabolism.fatty acid desaturation.first desaturation.delta-9 stearoyl-ACP desaturase *(AAD)'	'mercator4v5.0: delta-9 stearoyl-ACP desaturase *(AAD) & swissprot: Stearoyl-[acyl-carrier-protein] 9-desaturase, chloroplastic & original description: Stearoyl-acyl carrier protein desaturase (AHRD V1 **** B7TZ44_SPIOL); contains Interpro domain(s) IPR005067 Fatty acid desaturase, type 2'	Cp	2	Cp	Cp	Cp	Cp	100	stroma	plastid	plp_at_02592	Cp	0.94	0	No	Detected by both ITAG and Atlas
Solyc03g063240	Haem oxidase; Pyridoxamine 5'-phosphate oxidase-related FMN-binding protein (AHRD V1 ***- D6UPC6_9BACT); contains Interpro domain(s) IPR012349 FMN-binding split barrel	HOZ	At3g03890	XP_004234820.1	MKTLVLAPSPLRTFSPFSSFLYSNLNNNATHNYLLSPSPSKSFSSLTSTSPLLAMASQNVSSGDEVDIFQLIQAHQEKAARLSPIEDVRTLLHYSLRGVLSTFSQKYEGYPSASMVDFACDTYGSPILAVSNLAVHTKDLLATSRCSLLVARDPEDRTDLVITVHGDAVPVPEIEKEGIRATYLARHPTAFWVDFGDFHFMRIEPRIVRYVVGVATAILGSGEFSKEEFRTAKVDPIYQFSRPITSHMNKDHMEDTKLIVQHATSVPVDFAYMLDIDSLGFNVKACYKDTDLKLRVPFPRRAVDRKDVKALIVEMLQAART	5	15	5	2.981	0.019223	464	5	3	8	'7.14.2.2'	'Coenzyme metabolism.heme biosynthesis.heme oxygenase activities.beta-barrel heme oxygenase *(HOZ)'	'mercator4v5.0: beta-barrel heme oxygenase *(HOZ) & original description: Pyridoxamine 5&apos-phosphate oxidase-related FMN-binding protein (AHRD V1 ***- D6UPC6_9BACT); contains Interpro domain(s) IPR012349 FMN-binding split barrel'	Cp	3	Cp	possibly M	Cp	Cp	98.3	plastid stroma	plastid	-	Cp	0.7	0.18	No	Detected by both ITAG and Atlas
Solyc03g063560	ferredoxin-dependent glutamate synthase	GLU1	At5g04140	XP_004234830.1	MAVNSVANVPQLLYGQSPKILTGNKDGLFADFLGFYCKSSKRIRRRIGYAATNRRSLINKKCNAVLDLQRGASNASRQSSDIVPKVADLDDILSERGACGVGFIANLDNKASHGIVKDALVALGCMEHRGGCGADNDSGDGSGLMTSIPWDLFNDWAEKEGIAVFDKLHTGVGMVFLPNDSNQMNEAKKVISNIFNNEGLEVLGWRSVPVDSSVVGYYAKVTMPNIQQVFVRVVKEENVDDIERELYICRKLIERAVNSEIWGNELYFCSLSNQTIVYKGMLRSEVLGRFYYDLQNELYTSPLAIYHRRFSTNTSPRWPLAQPMRFLGHNGEINTIQGNLNWMQSREASLKSAVWRDREDEIRPFGNPKASDSANLDSTAELLIRSGRAPEEALMILVP…	53	691	53	20.8	0.134129	73	5	3	8	'25.1.4.2.1'	'Nutrient uptake.nitrogen assimilation.ammonium assimilation.glutamate synthase activities.Fd-dependent glutamate synthase *(Fd-GOGAT)'	'mercator4v5.0: Fd-dependent glutamate synthase & swissprot: Ferredoxin-dependent glutamate synthase 1, chloroplastic/mitochondrial & original description: Glutamate synthase (Ferredoxin) (AHRD V1 ***- B8HTZ7_CYAP4); contains Interpro domain(s) IPR002932 Glutamate synthase, central-C'	-	5	-	Cp	Cp	C	66	plastid stroma	plastid	plp_at_00488; plp_at_01537; plp_at_02447	Cp	0.55	0	No	Detected by both ITAG and Atlas
Solyc03g065340	Phosphorylase (AHRD V1 **** B9SJB6_RICCO); contains Interpro domain(s) IPR011833 Glycogen/starch/alpha-glucan phosphorylase	PHS1A	At3g29320	NP_001362574.1	MATANGAHLFNHCGSNSRFIHFTSRNTTSKLFLTKTSHFRTPKRSFHVNNILTDKIHHPITEQGGESDLSCFSPDAASITSSIKYHAEFTPVFSPERFELPNAFFATAQSVRDSLLINWNATYDVYEKLNMKQAYYLSMEFLQGRALLNAIGNLELTGAFAEALKNLGHNLENVASQEPDAALGNGGLGRLASCFLDSLATLNYPAWGYGLRYKYGLFQQRITKDGQEEVAEDWLEIGSPWEVVRNDVSYPIKFYGKVSTGSDGKRYWIGGEDIKAVAYDVPIPGYKTRTTISLRLWSTQVPSADFNLSAFNAGEHTKACEAQANAEKICYILYPGDESEEGKILRLKQQYTLCSASLQDIISRFERRSGDRIKWEEFPEKVAVQMNDTHPTLCIPELM…	24	85	20	3.19	0.0205708	447	5	3	8	'3.2.3.3.4'	'Carbohydrate metabolism.starch metabolism.degradation.hydrolysis and phosphorolysis.plastidial alpha-glucan phosphorylase *(PHS1)'	'mercator4v5.0: plastidial alpha-glucan phosphorylase *(PHS1) & swissprot: Alpha-1,4 glucan phosphorylase L-1 isozyme, chloroplastic/amyloplastic & original description: Phosphorylase (AHRD V1 **** B9SJB6_RICCO); contains Interpro domain(s) IPR011833 Glycogen/starch/alpha-glucan phosphorylase'	Cp	2	Cp	Cp	Cp	Cp	98.9	plastid stroma	plastid	plp_at_00310; plp_at_02531	Cp	0.92	0.03	No	Detected by both ITAG and Atlas
Solyc03g071590	Malate dehydrogenase (AHRD V1 **** Q5NE17_SOLLC); contains Interpro domain(s) IPR011273 Malate dehydrogenase, NADP-dependent, plants	NADP-MDH	At5g58330	NP_001234009.2	MAVAEFIPSSSLTKTTSLYPSQFLHVSTHKPRLSLTPLRRSKICCSVISNAPVPVAKEPTKKTECFGVFCLTYDLKAEEETSSWKKLINVSVSGAAGMIANHFLFKLASGEVFGPDQPVALKLLGSERSIQALEGVAMELEDSLFPLLREVSIGIDPYEVFQDAEWALLIGAKPRGPGMERAGLLDINGQIFAEQGKALNAVASRNVKVIVVGNPCNTNALICLKNAPDIPAKNFHALTRLDENRAKCQLALKAGVFYDKVSNMTIWGNHSTTQVPDFLNAKINGFPVKDVIRDSKWLEEEFTEKIQKRGGVLIQKWGRSSAASTAVSVVDAMRSLVTPTPEGDWFSTGVYTNGNPYGIAKDIVFSMPCRSKGDGDYELVKDVLMDDYLRSRIKKSEDE…	15	67	3	4.623	0.0298115	340	5	3	8	'1.2.12'	'Photosynthesis.calvin cycle.NADPH-dependent malate dehydrogenase *(NADP-MDH)'	'mercator4v5.0: NADPH-dependent malate dehydrogenase *(NADP-MDH) & swissprot: Malate dehydrogenase [NADP], chloroplastic & original description: Malate dehydrogenase (AHRD V1 **** Q5NE17_SOLLC); contains Interpro domain(s) IPR011273 Malate dehydrogenase, NADP-dependent, plants'	Cp	1	Cp	Cp	Cp	Cp	100	plastid stroma	plastid	plp_at_01606; plp_at_02466	Cp	1	0	No	Detected by both ITAG and Atlas
Solyc03g078080	Plastid 55 UMP kinase, PUMPKIN; Uridylate kinase (AHRD V1 **** B6TC37_MAIZE); contains Interpro domain(s) IPR015963 Uridylate kinase, bacteria	PUMPKIN	At3g18680	XP_004235078.1	MAISTSFCRPISSFNALSSPSLCYFKPLYNHLKLDPSLPLVKCCSSHIGQSPEHINGRQPDLSPIASFGVTMTNNGTSKPSYRWRRVLLKVSGEALAGDQAQNIDPKITMAIAREVAAVTRLGIEVAIVVGGGNIFRGSSWAGSSGLDRSSADYIGMLATVMNAIFLQATMESIGIPTRVQTAFRMSEVAEPYIRRRAVRHLEKGRVVIFAAGTGNPFFTTDTAAALRCAEINAEVVLKATNVDGVYDDNPKHNPNARLQDNLTYHDVISKELSVMDLTAITLCQENNIPVVVFNLNKTGNIAKAIKGERVGTLIGDTWNTEAVVS	1	3	1	0.166	0.00107045	1148	3	1	4	'6.2.3.2'	'Nucleotide metabolism.pyrimidines.phosphotransfers.plastidial UMP kinase *(PUMPKIN)'	'mercator4v5.0: plastidial UMP kinase *(PUMPKIN) & original description: Uridylate kinase (AHRD V1 **** B6TC37_MAIZE); contains Interpro domain(s) IPR015963 Uridylate kinase, bacteria'	Cp	4	-	Cp	Cp	Cp	93.9	plastid stroma	plastid	-	Cp	0.91	0.07	No	Detected by both ITAG and Atlas
Solyc03g081300	pTAC-15, MTERF8-like. At4g38160-like protein (Fragment) (AHRD V1 *--- C0JEI4_9BRAS); contains Interpro domain(s) IPR003690 Mitochodrial transcription termition factor-related	pTAC15 mTERF8	At5g54180	XP_004235022.1	MSTPTKSFRLSPSPSCLFPPIRTLFPSALLPCQKLAFYPQKQDKLPLHFLVPQDSTLLLLKCNALAINDSSTNSFVDSGVMLFSLFREIGFNETDTEALLDAHPVISLTPFESIRTRIHSLQSLGVSGLALSRLIVKRPDVLTAVEIDGLVSFLIEGDLELAGKIKSSQIEHLFNSTEPRFLEGFETKVRLLLEFGITQDTIVHVLNNANLTKAFCLKSFEDIERMLTFLNRFGGGDLILRRPALLNYDLDAQLIPRVGFLLELSGGDETGTATVLRKLPFVVAYSVDHLKDHVEFLKSYAGLSEEEIFRIVLVYPNMFSASRKRKLHPRIDFLKQCGLSSHDIFRFLIKIGYKKNTKELAMAMGAVTRTSCKNMQEVIGVFLNYGLTFDDILEMSMKH…	7	13	7	1.371	0.00884092	723	3	3	6	'15.6.1.2.3.4'	'RNA biosynthesis.organelle machinery.RNA polymerase activities.plastid-encoded RNA polymerase (PEP) complex.regulatory co-factor components.component *(TAC15)'	'mercator4v5.0: cofactor of plastid-encoded RNA polymerase *(TAC15) & swissprot: Transcription termination factor MTERF8, chloroplastic & original description: At4g38160-like protein (Fragment) (AHRD V1 *--- C0JEI4_9BRAS); contains Interpro domain(s) IPR003690 Mitochodrial transcription termination factor-related'	Cp	5	Cp	none	Cp	G	71.5	plastid nucleoid	plastid	-	-	0.23	0.01	No	Detected by both ITAG and Atlas
Solyc03g082580	Glucosamine-6-phosphate deamise (AHRD V1 ***- GB_ACHLI); contains Interpro domain(s) IPR005900 6-phosphogluconolactose	PGL4	At5g24400	NP_001296736.1	MAVSLASSSPILSSISPTRFSPIRRSILLTSFSVAGKPLFCSHPHRTSSNSWRSQCRTKASMAESVTGKSKAEVKLYDSEEELATALAKYTADLSEKFCKERDAFTVVVSGGSLIKSLRKLVEPPYINSIDWSKWHIFWVDERVVPKDHPDSNYLLAYNGFLSKIPIPAGHVYAINDALSAEAAADDYETCLRHLVKSKIVDISKESGFPKFDVMLLGMGPDGHIASLFPGHPLVHEKEKWVTFIKDSPKPPPNRITFTFPVINSSANIALAIVGAGKADVVQKSLGDDKSSDLLPVQMVSPEGELVWYLDMDAASKL	4	16	4	0.848	0.00546834	854	5	3	8	'3.9.1.2'	'Carbohydrate metabolism.oxidative pentose phosphate pathway.oxidative phase.6-phosphogluconolactonase'	'mercator4v5.0: 6-phosphogluconolactonase & swissprot: Probable 6-phosphogluconolactonase 4, chloroplastic & original description: Glucosamine-6-phosphate deaminase (AHRD V1 ***- NAGB_ACHLI); contains Interpro domain(s) IPR005900 6-phosphogluconolactonase'	Cp	1	Cp	Cp	Cp	Cp	100	plastid stroma	peroxisome,plastid	-	Cp	0.99	0.01	No	Detected by both ITAG and Atlas
Solyc03g082890	thylakoid lumenal 17.4 kDa protein, chloroplastic isoform X1 [Solanum lycopersicum]; Pentapeptide repeat protein (AHRD V1 *-*- B4WQI2_9SYNE); contains Interpro domain(s) IPR001646 Pentapeptide repeat	TL17.4	At5g53490	XP_004234987.1	MASISIPLAYKSHYLLRSPVYRPLQLHSPIQIKCSASKDCSNSEESSTQFKQLRNVACGFLAVWALSSVSPVIAAGQRLPPLSTDPDRCERAFVGNTIGQANGVYDKPLDLRFCDYTNEKTNLKGKSLAAALMSDAKFDGADMTEVIMSKAYAVGASFKGTDFSNAVLDRVNFEKANLQGASFKNTVLSGSTFNNAQLDGADFEDTIIGYIDLQKICTNKTIDEEGRVNLGCR	7	39	7	3.924	0.025304	380	5	3	8	'35.1'	'not assigned.annotated'	'mercator4v5.0: not classified & swissprot: Thylakoid lumenal 17.4 kDa protein, chloroplastic & original description: Pentapeptide repeat protein (AHRD V1 *-*- B4WQI2_9SYNE); contains Interpro domain(s) IPR001646 Pentapeptide repeat'	M	5	-	possibly M	Cp	Cp	100	thylakoid-peripheral-lumenal-side	plastid	plp_at_00574; plp_at_01265; plp_at_01691; plp_at_01960; plp_at_02572	Thylakoid	0.1	0.9	Yes	Detected by both ITAG and Atlas
Solyc03g082960	Serine/threonine phosphatase family protein (AHRD V1 **** C1E0J1_9CHLO); contains Interpro domain(s) IPR015655 Protein phosphatase 2C	PPH1 TAP38 PP2C57	At4g27800	XP_004234983.1	MALSSPHLQKVLLNKICSYKITSKKSIIQKPLGGGGGGGGEGRGRCSSAIAIDAPAPFTSVSGIRWGSTMVQGPREEMEDDAVIVQSDDLDGFTYAAVFDGHAGFSSVKFLREELYKECVLALQGGPLLNRKDLNAIRKALQEAFENADRELLNRLESSEKEDESGATATALFVGNDTLIIAHVGDSSVVLSRSGKTEILTNSHRPYGNNKVSLQEIRRINEAGGWIVNGRICNDISVSRAFGDMRFKTKKKEMLEKGVKERRWSEKFISRIQFRGDLVIASPDVLQVNLGSDAEFVLLASDGLWDYMKSDEIVDFVRNQLREHGDVQIACEALARLALDRRTQDNVSIVIADLGRTDWRNLPVKKQNVVLELGQALVTISFVSIGIWLSTMISP	3	7	3	0.778	0.00501695	875	4	3	7	'1.1.1.5.1.3'	'Photosynthesis.photophosphorylation.photosystem II.photosynthetic acclimation.regulatory phosphorylation.phosphatase *(PPH1/TAP38)'	'mercator4v5.0: phosphatase *(PPH1/TAP38) & swissprot: Protein phosphatase 2C 57 & original description: Serine/threonine phosphatase family protein (AHRD V1 **** C1E0J1_9CHLO); contains Interpro domain(s) IPR015655 Protein phosphatase 2C'	Cp	5	-	possibly Cp	not Cp	M	99.9	thylakoid-peripheral-stromal-side	plastid	-	Cp	0.68	0	No	Detected by both ITAG and Atlas
Solyc03g082970	PDE225/PTAC7 (AHRD V1 ***- D7M329_ARALY)	pTAC7 (PAP12)	At5g24314	XP_004234982.1	MAASTLTFSSFSTLQTFPRIAALENKKRVNLCIRAQSASNSKNEGRGERRIWRRRKLTKKDETLDAKMERIPFLEEQVRKIRDGGKLLTMDIHRLLLNEDNRFDFVNEIAAEAKQYVENNRDEYGAKKAILHVLSNRMNDAGVYRSEAYMDSDPFKPGPGYLKDELL	2	4	2	1.154	0.00744159	775	1	1	2	'15.6.1.2.2.12'	'RNA biosynthesis.organelle machinery.RNA polymerase activities.plastid-encoded RNA polymerase (PEP) complex.essential co-factor components.component *(PAP12/TAC7)'	'mercator4v5.0: cofactor of plastid-encoded RNA polymerase *(PAP12/TAC7) & swissprot: Protein PLASTID TRANSCRIPTIONALLY ACTIVE 7 & original description: PDE225/PTAC7 (AHRD V1 ***- D7M329_ARALY)'	Cp	2	Cp	Cp	Cp	N	95.6	plastid nucleoid	plastid	-	Cp	0.9	0.05	No	Detected by both ITAG and Atlas
Solyc03g083090	Starch Synthase 1, Glycogen synthase (AHRD V1 ***- D5MWN9_BACSU); contains Interpro domain(s) IPR011835 Glycogen/starch synthases, ADP-glucose type	SS1	At5g24300	XP_004234971.1	MGSLRTPTNLSNKSCLCVSGRVVKGLRVERQVGLGFSWLLKGRRNRKVQSLCVTSSVSDGSSIAENKKVSEGLLLGPERDGSGSVVGFQLIPHSVAGDATMVESHDIVANDRDDLREDAEEMEETPIKLTFNIIFVTAEAAPYSKTGGLGDVCGSLPMALAARGHRVMVVSPRYLNGGPSDEKYANAVDLDVRATVHCFGDAQEVAFYHEYRAGVDWVFVDHSSYRRPGTPYGDIYGAFGDNQFRFTLLSHAACEAPLVLPLGGFTYGEKCLFLANDWHASLVPLLLAAKYRPYGVYKDARSIVAIHNIAHQGVEPAATYNNLGLPPQWYGALEWIFPTWARAHALDTGETVNVLKGAISVADRILTVSQGYSWEITTPEGGYGLHELLSSRQSVLNGI…	14	42	14	4.179	0.0269484	364	5	3	8	'3.2.2.4.1'	'Carbohydrate metabolism.starch metabolism.biosynthesis.starch synthase activities.starch synthase *(SS1)'	'mercator4v5.0: starch synthase *(SS1) & swissprot: Soluble starch synthase 1, chloroplastic/amyloplastic & original description: Glycogen synthase (AHRD V1 ***- D5MWN9_BACSU); contains Interpro domain(s) IPR011835 Glycogen/starch synthases, ADP-glucose type'	Cp	5	Cp	possibly Cp	Cp	Cp	99.8	plastid stroma	plastid	plp_at_02562	Cp	0.69	0.01	No	Detected by both ITAG and Atlas
Solyc03g083280	Pentatricopeptide repeat-containing protein (AHRD V1 *-*- D7KJV7_ARALY); contains Interpro domain(s) IPR002885 Pentatricopeptide repeat	-	At3g49240	XP_004234966.1	MALSKHIFLTHHLRTLAKPHYLRHPQPPPSFISLRLLSFATPEEAAAERRKRKRRLRIEPPLSSLRQQHQPRPTTPQNPSSTNNPNAPKIPETVSVLSGNRLNLHNRILKLIRENDLDEAALYTRHSVYSNCRPTIFTCNAVMAAQLRQSRYSDLLSLHRFITQAGIGANIVTHNLLLTAFMDCRKTDMAMEHYKQLINNAPFNPSPTTYRILIKGLVDNNKIDRAMELKEEMLSKGMGEKRCRPDTLSYNNLIEQLCKNDLLGEAEELYKDMGEKGVSPDEFTFVLLMDTCFKESRPDDAAAYFKTMVESKLRPNLGVYDRLVDGLVKVGKVDEAKSFFDLMMGKLRMNDDSYKFMMNALFDIGQHDEVLKIVDRMLREDPADFSDELQEFVREALAK…	6	13	6	0.738	0.00475901	895	5	1	6	'35.1'	'not assigned.annotated'	'mercator4v5.0: not classified & swissprot: Pentatricopeptide repeat-containing protein At3g49240, mitochondrial & original description: Pentatricopeptide repeat-containing protein (AHRD V1 *-*- D7KJV7_ARALY); contains Interpro domain(s) IPR002885 Pentatricopeptide repeat'	M	5	Cp	M	Cp	C	49	-	mitochondrion	-	M	0.14	0.02	No	Detected by both ITAG and Atlas
Solyc03g083440	Glutamate synthase (AHRD V1 **** C1E4G5_9CHLO); contains Interpro domain(s) IPR012220 Glutamate synthase, eukaryotic IPR006005 Glutamate synthase, NADH/DPH, small subunit 1	GS1	At5g53460	XP_004234955.1	MPKKRTRVQSSATYPPMSIASSSVLQSKNNGVVMSSPVKSLVGHQLNAMPLGRVGVGLGRTRVTRSSVVKRTTGFEKKFYGAKLRASGPERLHLWQSDGPGRAPKLRVVVRSALSQVPEKPLGLYDPSFDKDSCGVGFVAELSGESSRKTVADAIEMLVRMSHRGACGCETNTGDGAGILVGLPHDFYKEVTSEAGFEIPPPGQYAVGMFFLPTSDSRREQSKIVFTKVAESLGHTVLGWRPVPTDNSGLGKSALQTEPIIEQVFLTPTPRSKVDFERQMYILRRVAMVAIRAALNLQHGGVKDFYVCSLSSRTVVYKGQLKPNQLKEYYFADLGNERFTSYMALVHSRFSTNTFPSWDRAQPMRVLGHNGEINTLRGNVNWMRAREGLLKCKELGLSK…	35	83	35	1.501	0.00967923	703	5	2	7	'25.1.4.2.2'	'Nutrient uptake.nitrogen assimilation.ammonium assimilation.glutamate synthase activities.NADH-dependent glutamate synthase *(NADH-GOGAT)'	'mercator4v5.0: NADH-dependent glutamate synthase & swissprot: Glutamate synthase 1 [NADH], chloroplastic & original description: Glutamate synthase (AHRD V1 **** C1E4G5_9CHLO); contains Interpro domain(s) IPR012220 Glutamate synthase, eukaryotic IPR006005 Glutamate synthase, NADH/NADPH, small subunit 1'	Cp	3	Cp	none	Cp	M	93.5	stroma	plastid	plp_at_00572	-	0.04	0	No	Detected by both ITAG and Atlas
Solyc03g093240	RESISTANT TO INHIBITION WITH FOSMIDOMYCIN 1, RIF1	RIF1	At3g47450	XP_004235165.1	MAPKLLALSSLSSICPFSIPNSSSSNLNLYRYHTTKPTLIFCKSTEPQTISESEPEGYGAAAPTRGDIYLQRQQVVAASSSVLATTKKKKKKDNIFKISKLAPCCYGCGAPLHTSEVDAPGYVDQETYELKKKHHQLRKILCGRCRLLSHGHMITAVGGNGGYSGGKQFVTAEELREKLSHVRHEKALIVKLVDIVDFNGSFLARVRDLAGANPIILVITKVDLLPKDTDLNCVGDWVVEATMKKKLNVLSVHLTSSKSLVGISGVVAEIQKEKKGRDVYILGSANVGKSAFINALLNTMSYKDPVAASARKHKPIQSAVPGTTLGPIPIDAFLGGEKLYDTPGVHLHHRQAAVIHAEDLPTLAPQSRLRGQVFPSSGRNLDSQIANRMRSSGLSGLSI…	2	9	2	0.616	0.00397229	940	3	2	5	'35.1'	'not assigned.annotated'	'mercator4v5.0: not classified & swissprot: NO-associated protein 1, chloroplastic/mitochondrial & original description: GTP-binding protein YqeH (AHRD V1 **-- C6VPQ3_LACPJ); contains Interpro domain(s) IPR002917 GTP-binding protein, HSR1-related'	Cp	4	Cp	possibly Cp	Cp	V	95.4	plastid stroma	plastid	-	Cp	0.76	0.01	No	Detected by both ITAG and Atlas
Solyc03g093520	Phosphofructokinase family protein (AHRD V1 ***- D7MV38_ARALY); contains Interpro domain(s) IPR012004 Pyrophosphate-dependent phosphofructokinase TP0108	PFK4	At5g61580	XP_004235183.1	MEFSLYNSSSLRFPQNDFLPLHNRSTLGSFHTFSIKKLASKSISTCRPLIWRRLPLVRRNAQTATESNASGDKHGEDDFIVEDVPHLTHFLPDLPSYTNPLKKSQAYAIVKKTFVSPEDMVAKEIIVQKDSPRGIHFRRAGPREKVFFTPEEVRACIVTCGGLCPGINTVIREIVCGLKNMYGVDDVLGIQGGYSGFYSKNTLNLTTKVVNDIHKRGGTFLQTSRGGHDTKKIVDNIQDRGINQVYIIGGDGTQKGAAAIYKEVEKRGIKVAVAGIPKTIDNDIAVIDKSFGFDTAVEEAQRAINAAHVEAESVQNGVGIVKLMGRYSGFIAMLATLGNRDVDCCLIPESPFYLEGPGGLYEYVEQQLKENRHVLIVLAEGAGQEYVAQSMQAFQEKDA…	5	15	4	0.682	0.00439789	912	5	3	8	'2.1.1.1.1'	'Cellular respiration.glycolysis.cytosolic glycolysis.phosphofructokinase activities.ATP-dependent phosphofructokinase'	'mercator4v5.0: ATP-dependent phosphofructokinase & swissprot: ATP-dependent 6-phosphofructokinase 4, chloroplastic & original description: Phosphofructokinase family protein (AHRD V1 ***- D7MV38_ARALY); contains Interpro domain(s) IPR012004 Pyrophosphate-dependent phosphofructokinase TP0108'	Cp	3	Cp	possibly Cp	Cp	C	98.9	plastid stroma	plastid	-	Cp	0.54	0	No	Detected by both ITAG and Atlas
Solyc03g093690	Peptide methionine sulfoxide reductase msrA (AHRD V1 **** D2B4D8_STrRNAD); contains Interpro domain(s) IPR002569 Methionine sulphoxide reductase A	MSRA4	At4g25130	NP_001307972.1	MLLKTCLPSSTIATKSPLISFSKSTLLLPPFSRKVSSTFPRTSKTPSLYSPPKMSWLNKLGFGARTDTPMDSSSSAIPQGPDTDIPAPGQQFVQFGAGCFWGVELAFQRVPGVTKTEVGYSQGYLDNPTYEDICSGNTFHSEVVRVQYDPKECNFDTLLDVFWDRHDPTTLNRQGNDVGTQYRSGIYFYTPEQEKAALEARDRQQKILNRNIVTEILPAKKFYRAEEYHQQYLAKGGRFGFRQSVEKGCNDPIRCYG	7	31	4	2.384	0.0153733	545	5	3	8	'10.3.4.1'	'Redox homeostasis.thiol-based redox regulation.methionine sulfoxide reductase activities.methionine S-enantiomer sulfoxide reductase *(MsrA)'	'mercator4v5.0: methionine S-enantiomer sulfoxide reductase *(MsrA) & swissprot: Peptide methionine sulfoxide reductase & original description: Peptide methionine sulfoxide reductase msrA (AHRD V1 **** D2B4D8_STRRD); contains Interpro domain(s) IPR002569 Methionine sulphoxide reductase A'	Cp	1	Cp	Cp	Cp	Cp	52.7	plastid stroma	plastid	-	Cp	0.91	0.01	No	Detected by both ITAG and Atlas
Solyc03g094175	Pterin-4-alpha-carbinolamine dehydratase; SDIR-interacting protein; RuBisCo Assembly Factor 2	-	At5g51110	XP_004253324.1	MAAATHLSFSPPISVSSLPLRKPNFVTPNLQTSQSRICTRIRCNTNLLGDFGARDPFPAEVESKFGEKVLGNPDTEHKILIPAASALSLANQECTDISPNQTPLSEFEAKQLLFKVVGWRIANEDGVLKLQCTWKLKDFDCGVELINRIGKVVEGTGHLPTLHQLQQSNQVHAELWTPSIGGLSMNDFIIAAKIDQVKTSDLVPRKRVWA	3	8	3	2.162	0.0139417	570	3	3	6	'1.2.1.2.6'	'Photosynthesis.calvin cycle.ribulose-1,5-bisphosphat carboxylase/oxygenase (RuBisCo) activity.RuBisCo assembly.assembly factor *(RAF2)'	'mercator4v5.0: assembly factor involved in RuBisCo assembly *(RAF2) & swissprot: Probable pterin-4-alpha-carbinolamine dehydratase, chloroplastic & original description: Transcriptional coactivator/pterin dehydratase (AHRD V3.3 *** A0A200Q8U8_9MAGN)'	Cp	1	Cp	Cp	Cp	Cp	99.94	plastid stroma	plastid	-	Cp	0.966867	0.03244	#N/A	ITAG only
Solyc03g095180	Superoxide dismutase (AHRD V1 **** Q7YK44_SOLLC); contains Interpro domain(s) IPR001189 Manganese/iron superoxide dismutase	Fe-SOD2A (PAP9)	At5g51100	XP_004235206.1	MAAATASATLFSPFLPSPGFHESCRSLNWRTHKKQIASKAGTVKVTAKFELNPPPYPMNALEPHMSRTTFEYHWGKHHRAYVDNLNKQIVGTELDELTLEDIILVTYNQGNLLPPFNNAAQAWNHQFFWESMKPGGGGQPSGELLKLINRDFGSFEAFVKEFKAAAATQFGSGWAWLAYKANRLDVGNASNPHPSDEDKKLVIVKTPNAINPLVWDYSPLLTIDVWEHAYYLDFRNRRPDYISIFMEKLVSWEAVSSRLEAAQAQAAEREKEEERKKREEEEEYQDGNEVREMYVETTDSEAD	12	109	11	157.489	1.01557	15	5	3	8	'10.1.1.1'	'Redox homeostasis.reactive oxygen scavenging.superoxide dismutase activities.iron superoxide dismutase *(FSD)'	'mercator4v5.0: iron superoxide dismutase *(FSD) & swissprot: Superoxide dismutase [Fe] 2, chloroplastic & original description: Superoxide dismutase (AHRD V1 **** Q7YK44_SOLLC); contains Interpro domain(s) IPR001189 Manganese/iron superoxide dismutase'	Cp	2	Cp	Cp	Cp	Cp	99.6	plastid stroma	plastid	plp_at_00565	Cp	1	0	No	Detected by both ITAG and Atlas
Solyc03g095620	aarF domain-containing protein kinase	-	At5g05200	NP_001311229.1	MAVVTVLRGVSHGRLPLLTHSQFPIVTPTNIAYRNRPNVLRVFARYSQTQDLFTSRLQDRLENLPKLVEDIVQTSLSTGPRGALRLAQGVQAVVGVGSEWLQDVSKTANSSTGLPTQLQLGLLSPLYLRKLFERMGATYIKLGQFIASAPTLFPPEYVQEFQYCFDRAPAVPFEQIQTILREELGRPIDTVFEYIDPTPVASASIAQVHGARIRGTGEDVVIKVLKPGIEDILVADLNFIYIAARILEFLSPDLSRASLVAIVKDIRESMLEEVDFNKEATNVESFRNYLEAMGLTRQATAPKVYRQYSTKRILTMERLYGVPLTDLDSIKSLVSSPETSLITALNVWFGSLLACESFHADVHAGNLWQLRDGRIGFLDFGIVGRISPKTWAAMEVFLQ…	7	17	7	1.219	0.00786074	759	5	2	7	'18.4.21'	'Protein modification.phosphorylation.ABC1 atypical protein kinase'	'mercator4v5.0: ABC1 atypical protein kinase & swissprot: Uncharacterized aarF domain-containing protein kinase At5g05200, chloroplastic & original description: ABC-1 domain protein (AHRD V1 **-- A1TWJ2_MARAV); contains Interpro domain(s) IPR004147 ABC-1'	M	3	Cp	possibly M	Cp	M	90.7	plastoglobules	plastid	-	M	0.07	0	No	Detected by both ITAG and Atlas
Solyc03g095990	Unknown Protein [transmembrane protein [Arabidopsis thalianana], e-value 1e-53]	-	At3g56010	XP_010318243.1	MRGLRRCVPVTRHNFYLLVAKSDRLETEVSDKDSENAERSYSEAITPTVNTSSFESSKTEGEVQPIGQTDSAVQEAEASNGSGTSANLEEEASSSSPKPTLKRSPLTAREKLRAARVLSRYNESKTSKPQMGSKLIEALRESEKGKMRSGLPEAPTNLFDDSKRGMPKPGWTFEFPGGIDVFLVVFSFVFISTVMFATTYIVWKVGAIHFNE	1	3	1	0.668	0.00430761	915	2	0	2	'35.2'	'not assigned.not annotated'	'mercator4v5.0: not classified & original description: Unknown Protein (AHRD V1)'	M	2	-	possibly M	Cp	N	83.46	plastid	plastid	plp_at_01829	-	0	0	No	ITAG only
Solyc03g096850	Similar to AtENH1 (enhancer of SOS3)	ENH1	At5g17170	XP_004235309.1	MASAVVAGAASSSCSVSYSRNLSITKSNSSIPSLKSSTTPSQRTSFQGLSLQEAKRGVSNTFLGAESKRNATSNGGSRGLEITARKAAAAKNIEVEVDKPLGLTLGPKQGGGVLITGIDNGGNAARAGLKVGDQVVYTSSFFGDELWPADKLGFTKTAIQAKPDSVYFVISRGADVDVKRLPKRPAPPQFGRKLTDAQKARATHICLDCGYIYTLPKSFDEQPEDYACPQCIAPKKRFARYDVNTGRAIGGGLPPIGVIIGLIAGIGGVGALLVYGLQ	3	5	3	0.54	0.0034822	973	4	2	6	'35.2'	'not assigned.not annotated'	'mercator4v5.0: not classified & original description: Genomic DNA chromosome 5 P1 clone MKP11 (AHRD V1 **-- Q9FFJ2_ARATH); contains Interpro domain(s) IPR001478 PDZ/DHR/GLGF'	Cp	1	Cp	Cp	Cp	Cp	99.9	thylakoid	plastid	plp_at_00517; plp_at_01257; plp_at_01558; plp_at_01886	Cp	1	0	No	Detected by both ITAG and Atlas
Solyc03g097130	ATP-binding protein (AHRD V1 ***- D7M885_ARALY); contains Interpro domain(s) IPR000719 Protein kinase, core	-	At5g16810	XP_004235297.1	MVVGGAVADCLSKCGSSFAARSSSSSFCGIGLRLNLNSNINRTIRPRQAFVGLCVASLITDSDSFEVGRLIGSYGFMNVTSYSGLQSGMAMDYAVSEDIGNFKVQDIGEGSVKIRLYEGRVAQGPLRGTRVIFKVYPGQQVGGTEADMMAANELNAHASLQSNPKDICPHIQALLGGFETKTGEQWLAFRDIGKYSAADYAKITSENMSKMIGGGEQRLWNPFELDLTIKRRRYFVVRLLHGTMRGLSYMHDNDRLHQSLGPASVVLNTVVEKDAAYLIPRLRDLAFSVDVRYSQLEDRPNILSEGLWRRASVAGASSPLERRAFGIADDIYEAGLLFAYLAFVPFCEAGVMDSISLRRLLENTFQLDLQAAREYCSADDRLLEAVKFLDLGDGAGWEL…	7	20	7	1.462	0.00942773	704	5	3	8	'35.2'	'not assigned.not annotated'	'mercator4v5.0: not classified & original description: ATP binding protein (AHRD V1 ***- D7M885_ARALY); contains Interpro domain(s) IPR000719 Protein kinase, core'	Cp	2	Cp	Cp	Cp	Cp	98.5	-	-	-	Cp	0.8	0.07	No	ITAG only
Solyc03g097250	Uncharacterized protein	-	At3g02900	NP_001315610.1	MATGAAPFSLSGATHVKACEPWSAKSSSFVKTPMVAIQKKSNSQGTKTSKLSIRANYSDQRGGGGNGGDFVAGFLLGGAIFGTLGYIFAPQIRRSLLNEDEYGFRKAKRPMYYYDEGLEKTRQTLNNKLDQLNSAIDKVSSGLRGGNKMPSVPVESDAEEATM	1	1	1	0.212	0.00136709	1112	1	1	2	'5.1.3.2.4'	'Lipid metabolism.fatty acid metabolism.acetyl-CoA carboxylation.polymeric acetyl-CoA carboxylase complex.regulatory protein *(CTI)'	'mercator4v5.0: regulatory protein *(CTI) of polymeric acetyl-CoA carboxylase & original description: Chromosome 06 contig 1 DNA sequence (AHRD V1 *-*- Q016K0_OSTTA)'	Cp	3	Cp	Cp	Cp	Cp	99.6	plastid	plastid	-	Cp	0.79	0.19	No	Detected by both ITAG and Atlas
Solyc03g097290	Alanyl-tRNA Synthetase (AHRD V1 **** Q9FFC7_ARATH); contains Interpro domain(s) IPR002318 Alanyl-tRNA synthetase, class IIc	ALATS	At1g50200	XP_004235270.1	MRVSIDGSTWRCIALALPYYYRAATLPSSAALLLPPSPAVSGRLFNFTRTFSVSKPMGSQPEVLDWPANKVRQTFISFFQGKDHKEVQSSPVVPHNDPTLLFANAGMNQFKPIFLGIVDPNSPLSKLKRACDTQKCIRAGGKHNDLDDVGKDTYHHTFFEMLGNWSFGDYFKKEAIGWAWELLTQVYKLPSERIYATYFGGDEKSGLPADNEARDLWLKFLPPSRVLPFDCKDNFWEMGDTGPCGPCTEIHFDRIGNRDAASFVNNDDPTVIEIWNLVFIQFNREADGSLKPLPAKHVDTGMGFERLTSILQNKMSNYDTDVFLPIFDAIQKATGARPYSGKVGADDVDNVDMAYRVVADHIRTLSFAIADGSCPGNEGREYVLRRILRRAVRYGTEVL…	2	2	2	0.093	0.000599712	1217	1	0	1	'17.2.1'	'Protein biosynthesis.aminoacyl-tRNA synthetase activities.alanine-tRNA ligase'	'mercator4v5.0: alanine-tRNA ligase & swissprot: Alanine--tRNA ligase & original description: Alanyl-tRNA synthetase (AHRD V1 **** C1EDP7_9CHLO); contains Interpro domain(s) IPR018164 Alanyl-tRNA synthetase, class IIc, N-terminal'	M	2	Cp	ER	Cp	C	99.2	plastid stroma; mitochondria	mitochondrion	-	M	0.24491	0.001257	No	Detected by both ITAG and Atlas
Solyc03g097360	BolA-like IPR002634 BolA-like protein	BolA4	At5g17560	XP_004235350.1	MTKALFVRPNVAALCIRRLSCSVQPRLSAMVKCYSIAVRSYRPMKQLSHIGLKFEAFAGHRSFSIRATSDTGSSSFDSPLMQSMEKKIKEQLDADTVVVKDAYGDGRHVSIDVIATAFEGQSAVNRQRMVYKAIWEELQNTVHAVDQMTTKTPTEAAAGK	3	16	3	1.512	0.00975016	692	5	3	8	'7.12.2.1.8'	'Coenzyme metabolism.iron-sulfur cluster assembly machinery.mitochondrial ISC system.assembly phase.redox-dependent regulator *(BolA4)'	'mercator4v5.0: redox-dependent regulator (BolA4) of iron-sulfur cluster assembly machinery & swissprot: Protein BOLA4, chloroplastic/mitochondrial & original description: BolA-like (AHRD V1 ***- Q67VQ4_ORYSJ); contains Interpro domain(s) IPR002634 BolA-like protein'	M	4	-	M	Cp	Cp	66.29	plastid stroma	plastid	-	M	0.35	0	No	ITAG only
Solyc03g097370	DNA helicase-like (AHRD V1 **** Q9FGC2_ARATH); contains Interpro domain(s) IPR003593 ATPase, AAA+ type, core	-	At5g35970	XP_004235277.1	MQVKLLKMEASCNFCSSIYTLAPSCLSLRFRQKRSNLSSFIAKNRTFLDSISIRATASSSSSGGGTKAVTTRRRKPKNGGTNGGSGKNAKVSEIPAVSTKGSSGKVVDKVQVKRKKQQEECFQDDGPVNVRALHQNGDPLGRKDLGKCVVRWLSQGMRAMALDFVTAEMQGEFAELKQRMEPGLTFVIQAQPYINAVPMPLGLEAICLKACTHYPTLFDNFQRELREVLQDFQSKSSVQDWRETESWKLLKDLASSAQHKAIARKESQPKSVPGVMGMDLEKAKAIQSRIDDFANRMSDLLHIERDAELEFTQEELNAVPAPDVTSEAQKPLEFLVSHAQPEQELCDTICNLTAVSTSIGLGGMHLVLFKLEGNHRLPPTNLSPGDMVCVRICDSRGAG…	16	37	16	2.162	0.0139417	571	5	3	8	'35.1'	'not assigned.annotated'	'mercator4v5.0: not classified & swissprot: Regulator of nonsense transcripts 1 homolog & original description: DNA helicase-like (AHRD V1 **** Q9FGC2_ARATH); contains Interpro domain(s) IPR003593 ATPase, AAA+ type, core'	Cp	3	Cp	possibly Cp	Cp	N	93.5	plastid stroma	plastid	plp_at_00542; plp_at_01579	-	0.22	0	No	Detected by both ITAG and Atlas
Solyc03g097470	3-oxoacyl-(Acyl-carrier-protein) synthase III (AHRD V1 ***- D5A3B9_SPIPL); contains Interpro domain(s) IPR004655 Beta-ketoacyl-acyl carrier protein synthase III (FabH)	KAS3	At1g62640	XP_004235286.1	MANTTIAAGPTFSLQHRHQVFGRVGVSTLRHQQGHTLFFTQAVPAIRRKFCPSIGIYQDRQSFSDGTFNSVMCSSSVEGADKVSTDQSRVLRLGNRGCKLIGCGSAVPSLNVSNDDLAKIVDTNDQWISVRTGIRNRRVLSGKDSLTDLAAEAARKALEMAEVDPDDVDLILLCSSTPEDLFGSAPQVQRALGCKSNPLSFDITAACSGFMLGLVSAACYIRGGGFKNVLVIGADALSRYVDWTDRGTCILFGDAAGAVVVQACDIGEDGLFGFDLHSDGGGQRHLNALIKDNETDHAFGTNGSVIGFPPSNSSYSCIQMNGKEVFRFAVRVVPQSIEAALENAGLPRSKIDWLLLHQANQRILDAVATRLEVPPEHVISNLANYGNTSAASIPLALDE…	8	40	8	5.31	0.0342416	307	5	3	8	'5.1.4.2.3'	'Lipid metabolism.fatty acid metabolism.plastidial fatty acid synthase (ptFAS) system.ketoacyl-ACP synthase (ptKAS) activities.ketoacyl-ACP synthase III'	'mercator4v5.0: ketoacyl-ACP synthase III & swissprot: 3-oxoacyl-[acyl-carrier-protein] synthase 3 A, chloroplastic & original description: 3-oxoacyl- (AHRD V1 ***- D5A3B9_SPIPL); contains Interpro domain(s) IPR004655 Beta-ketoacyl-acyl carrier protein synthase III (FabH)'	M	5	Cp	Cp	Cp	Cp	100	plastid stroma	plastid	-	Cp	0.91	0.01	No	Detected by both ITAG and Atlas
Solyc03g097910	PYD1, PYRIMIDINE 1	PYD1	At3g17810	NP_001234738.1	MASLGLAQRIRIGLDGNSGVENPVMGRAGRLNFGRKRVGFRIMALEGQSVEPDLSVTVNGLKMPNPFVIGSGPPGTNYTVMKRAFDEGWGGVIAKTVSLEADKVKNVTPRYAKLRADANGSAKGQIIGWQNIELISDRPLETMLKEFKQLKEEYPDRILIASIMEEYNKAAWEELIYRCEETGIDAFEINFSCPHGMPERRMGAAVGQDCDLLEEVCGWINAVATVPVWAKMTPNITDITKPARVALNQGCEGVSAINTIMSVMGINLDTLRPEPCVEGYSTPGGYSSKAVHPIALAKVMNIARMMKSEFGDKDYSLSAIGGVETGGDAAEFILLGADTVQVCTGVMMHGYGLVKTLCSELKDFMRKHNFSSIEDFRGTSLEYFTTHTDLVRRQQEAIR…	8	23	7	3.084	0.0198872	454	5	3	8	'6.2.4.3'	'Nucleotide metabolism.pyrimidines.catabolism.dihydropyrimidine dehydrogenase *(PYD1)'	'mercator4v5.0: dihydropyrimidine dehydrogenase & swissprot: Dihydropyrimidine dehydrogenase (NADP(+)), chloroplastic & original description: Dihydroorotate dehydrogenase family protein (AHRD V1 **** D7L7W7_ARALY); contains Interpro domain(s) IPR005720 Dihydroorotate dehydrogenase, class 1, core'	-	5	-	possibly M	Cp	C	43.18	plastid	plastid	-	-	0.33	0	No	Detected by both ITAG and Atlas
Solyc03g097950	50S ribosomal protein L29 (AHRD V1 ***- B6TS58_MAIZE); contains Interpro domain(s) IPR001854 Ribosomal protein L29	RPL29A	At5g65220	XP_004235356.1	MMSLSIATPPSSVNFASKLNLSKSSFHGVRIAQVCPVHARSAHSIATTRSSSLMVVNMAKRDDELKEIRTKTTEELQEEIVDLKGELFMLRLQRSARNEFKSSEFLRMRKRIARMLTVKREREMEEGINKRISRKLDRKWKKSIVPRPPPSLKKLREEEAAEEAKESA	1	1	0			1260	0	1	1	'17.6.2.2.25'	'Protein biosynthesis.organelle machinery.plastidial ribosome biogenesis.large ribosomal subunit proteome.component *(uL29c)'	'mercator4v5.0: component *(uL29c) of large plastid ribosomal-subunit proteome & original description: 50S ribosomal protein L29 (AHRD V1 ***- B6TS58_MAIZE); contains Interpro domain(s) IPR001854 Ribosomal protein L29 '	Cp	1	Cp	Cp	Cp	Cp	90.9	plastid ribosome	plastid	plp_at_00596; plp_at_01618	Cp	0.998305	0.000473	NA	Atlas only
Solyc03g098000	UV-induced protein similar to At3g17800; DUF 760 domain	-	At1g48450	XP_004235367.1	MSPSGIKLYPSISHVKLSNRKVAFGSRKYTAIRASVSPSESGGSAAPIAPLQLESPIGQFLCQILTSHPHLVSAAVDQQLELLKIDRDAEQQKEEPSIAGTDIVLYRRIAEVKANERKKTLEEILYALVVQKFMDANVSLVPAISPSSSEPSGRIDTWPSQDDKLEHLHSAEANEMIQNHLSLILGSRLGDDSAVAQISKLRVGQVYAASIMYGYFLRRVDQRFQLEKSMKVLPPGVDNEDSSIQQVAGEDISGDRSDTSFRSTTQTHPELTSWSAGGVSPGGFGQGIKPSRLRNYVMSFDGETLQRYATIRSREAIGMIEKHTEALFGRPEIVITPQGTIDSSKDELIKISFGGLRRLVLEAVTFGSFLWDVESYVDSRYHFVAN	4	19	4	1.683	0.0108529	656	5	2	7	'35.1'	'not assigned.annotated'	'mercator4v5.0: not classified & swissprot: UV-B-induced protein At3g17800, chloroplastic & original description: At1g32160/F3C3_6 (AHRD V1 ***- Q9FVR1_ARATH); contains Interpro domain(s) IPR008479 Protein of unknown function DUF760'	Cp	4	Cp	possibly Cp	Cp	M	66.5	plastid	-	-	-	0.32	0.01	No	Detected by both ITAG and Atlas
Solyc03g098230	Bifunctional D-cysteine desulfhydrase/1-aminocyclopropane-1-carboxylate deaminase	DCD	At1g48420	NP_001234368.1	MSSCQWSSFTRVSLSPFPLQPAQLNTALNLKKQCCFTKSSMEDSSSQGHQSAFQFLTKKPYEPPPWASLLSPIPSHTFSLGHFPTPIHKWNLPNLPKNTEVWLKRDDMSGMQLSGNKVRKLEFLLADAVAQGADCIVTIGGIQSNHCRATAVAAKYLNLDCYLILRTSKLLVDKDPGLTGNLLVDRLVGAHIDLVSKEEYAKVGGEALTKILKEKLLNEGRKPYVIPVGGSNSLGTWGYIEAIRELEQQLQHLSIEQKFDDIVVACGSGGTVAGLSIASMLSGLKAKINAFCVCDDPDYFYEYVQGLLDGITAGVSSRDIVSIKTAKGLGYALSTTDELKFVKQVAETTGVILDPVYSGKAAYGMMKDMGENPTKWEGRKILFIHTGGLLGLYDKADEI…	7	10	7	1.404	0.00905372	719	5	3	8	'35.1'	'not assigned.annotated'	'mercator4v5.0: not classified & swissprot: Putative D-cysteine desulfhydrase 1, mitochondrial & original description: Pyridoxal phosphate-dependent enzyme D-cysteine desulfhydrase family (AHRD V1 **** D0LXJ6_HALO1); contains Interpro domain(s) IPR005966 Pyridoxal phosphate-dependent deaminase'	Cp	4	Cp	possibly Cp	Cp	Cp	90.7	plastid	plastid	plp_at_00092	Cp	0.53	0.07	No	Detected by both ITAG and Atlas
Solyc03g098440	Small glutamine-rich tetratricopeptide repeat-containing protein A (AHRD V1 *--- C1BM93_OSMMO); contains Interpro domain(s) IPR011990 Tetratricopeptide-like helical	-	At3g17670	XP_004235396.1	MSAIHLSTLRSISQQPFSLFLLFPLPKFKSINNTRIKASSVKEEEVERKMEIRVCTERACRKQGSLDTLQVLSGIAPPFVAVNSCGCLGRCGAGPNVVVLPGAVYVKHVGTPTRTAEVMAFVCLGRDDVEGESRRSLEALALRKRAEDEMGNGNFSEAHGLLSQAIALKPFGGVHIMLKDRCAAELAMGNLAEALEDSKEALNIAPNYPEGYICQGDVLMALDHVDAAERSYSMALELDPSIRRSKSFKARITKLNEKLALANSA	1	3	1	0.212	0.00136709	1113	3	2	5	'35.2'	'not assigned.not annotated'	'mercator4v5.0: not classified & original description: Small glutamine-rich tetratricopeptide repeat-containing protein A (AHRD V1 *--- C1BM93_OSMMO); contains Interpro domain(s) IPR011990 Tetratricopeptide-like helical'	Cp	4	Cp	possibly M	Cp	Cp	56.3	-	-	-	Cp	0.57	0.14	No	Detected by both ITAG and Atlas
Solyc03g110960	Nucleoside diphosphate kinase (AHRD V1 **** B9RAM1_RICCO); contains Interpro domain(s) IPR001564 Nucleoside diphosphate kinase, core	NDK2	At5g63310	XP_004236354.1	MESLCIVRASPCVSSSSSLSSKTSSLSCAPSCRVILNPIKKHHNLAAFQPAFHLFASTQSGPHGSKRNHTARIFLPHLVASMEEVEETYIMIKPDGVQRGLVGEIISRFEKKGFKLTGLKLFQCPKELAEEHYKDLQSKSFFPKLIDYITSGPVVCMAWEGIGVVASARKLIGATNPLNAEPGTIRGDLAVQTGRNVVHGSDSPENGKREIALWFKEGELSSWTPAQQPWLTE	9	83	4	9	0.0580367	170	5	3	8	'6.3.2.4'	'Nucleotide metabolism.deoxynucleotides.salvage pathway.nucleoside diphosphate kinase'	'mercator4v5.0: nucleoside diphosphate kinase & swissprot: Nucleoside diphosphate kinase 2, chloroplastic & original description: Nucleoside diphosphate kinase (AHRD V1 **** B9RAM1_RICCO); contains Interpro domain(s) IPR001564 Nucleoside diphosphate kinase, core'	Cp	1	Cp	Cp	Cp	Cp	99.9	plastid stroma	plastid	plp_at_01612; plp_at_02468	Cp	0.94	0	No	Detected by both ITAG and Atlas
Solyc03g111050	Plastid transcriptionally active 10	pTAC10 (PAP3)	At3g48500	NP_001334062.1	MQTLQTCSFFFTFPSPKTLLKPINSSKFTSFPFFNLSTSSNFKHSPLTLHCFSSDEYPVGDDDAFLEAFGPKEKESEEEARRRNWVDRGWAPWEEILSPEADFARKSLNEGEEVALQSPEAIEAFRMLSPNYRKKKIEEMGITEDEYYAKQFEIKGDIPEPLETTWAGPLVVRHVPPRDWPPRGWEVDKKELEFIREAHKMQAVRVDYDKVEEMVNTETDDMSLERYKVFLKQYNEWVAANKDRLEEESYKYDQDYYPGRRKRGKDYQDGMYELPFYYPGQICAGKVTAIHLYQGAFVDIGGVHDGWVPIKRNDWYWIRHHIKVGMHVMVEILAKRDPYRFRFPIEMRFVDPNIDHLIFNRFDFPPIFHREEDTNLDELRRDCGRQPIPRKDPGVKVEE…	9	18	9	1.264	0.00815093	752	5	0	5	'15.6.1.2.2.3'	'RNA biosynthesis.organelle machinery.RNA polymerase activities.plastid-encoded RNA polymerase (PEP) complex.essential co-factor components.component *(PAP3/TAC10)'	'mercator4v5.0: cofactor of plastid-encoded RNA polymerase *(PAP3/TAC10) & swissprot: Protein PLASTID TRANSCRIPTIONALLY ACTIVE 10 & original description: Plastid RNA-binding protein (AHRD V1 **-- D6QX33_NICBE); contains Interpro domain(s) IPR003029 Ribosomal protein S1, RNA binding domain'	Cp	3	Cp	possibly Cp	Cp	N	82.6	plastid nucleoid	plastid	plp_at_00327	Cp	0.7	0.2	No	Detected by both ITAG and Atlas
Solyc03g111260	Ribonuclease J; Metallo-beta-lactamase family protein (AHRD V1 *-*- A3ERL5_9BACT); contains Interpro domain(s) IPR001279 Beta-lactamase-like	RNJ	At5g63420	XP_010319059.1	MAAAFSAISLCPYKLCHQLNPRKHFISCYTPSTSSIGIRGSKGPRKRPDKLEGAGRSIDDSVQRRMEQFYEGSDGPPLRVLPIGGLGEIGMNCMLVGNYDRYILIDAGIMFPGYDEPGVQKIIPDTTFIKKWSHKIEAVIITHGHEDHIGALPWVIPALDSHTPIFASSFTMELIKKRLKEFGIFVPSRLKVFKTRRKFTAGPFEVEPITVTHSIPDCSGIVLRCSDGTILHTGDWKIDESPLDGKVFDREALEELSKEGVTLMMSDSTNVLSPGRTLSETVVADSLLRRISAAKGRVITTQFASNIHRLGSVKAAADLTGRKLVFVGMSLRTYLDAAWKDGKAPIDPSTLVKVEDIDAYAPKDLLIVTTGSQAEPRAALNLASYGSSHSLKLNKEDLV…	15	36	15	1.26	0.00812513	753	5	3	8	'16.6.3.1.2'	'RNA processing.organelle machinery.RNA homeostasis.ribonuclease activities.exoribonuclease *(RNase J)'	'mercator4v5.0: exoribonuclease *(RNase J) & swissprot: Ribonuclease J & original description: Metallo-beta-lactamase family protein (AHRD V1 *-*- A3ERL5_9BACT); contains Interpro domain(s) IPR001279 Beta-lactamase-like'	Cp	3	-	Cp	Cp	N	75.7	plastid stroma	plastid	plp_at_00589	Cp	0.9	0.07	No	Detected by both ITAG and Atlas
Solyc03g111610	HAD-superfamily hydrolase subfamily IA variant 3 containing protein expressed (AHRD V1 **** Q10I42_ORYSJ); contains Interpro domain(s) IPR005834 Haloacid dehalogese-like hydrolase	-	At3g48420	XP_004236312.1	MALRVVSSSPAIFSSQRRAASVLPSTLTLPNTNSSLLSSSSPISSIDRTKSVVTLRSKTSRRSGVVTCSASVLPKALLFDCDGVLVDTEKDGHRISFNDTFSEKELGVTWDVDLYGELLKIGGGKERMTAYFNKVGWPENAPKTEEERKEFIAGLHKRKTELFMVLIEKKLLPLRPGVEKLIDQALGNGVKVAVCSTSNEKAVSAIVSCLLGPERAEQIQIFAGDVVPRKKPDPAIYLLAAETLAVDPSSCVVVEDSGIGLAAAKAAGMTCIVTKSGYTAEENFSNADAVFDCIGDPPEERFDLAFCGSLLEKQYVS	13	122	13	16.191	0.104408	106	5	3	8	'1.2.1.3.3'	'Photosynthesis.calvin cycle.ribulose-1,5-bisphosphat carboxylase/oxygenase (RuBisCo) activity.RuBisCo regulation.xylulose-1,5-bisphosphate phosphatase *(CbbY)'	'mercator4v5.0: xylulose-1,5-bisphosphate phosphatase *(CbbY) & swissprot: CBBY-like protein & original description: HAD-superfamily hydrolase subfamily IA variant 3 containing protein expressed (AHRD V1 **** Q10I42_ORYSJ); contains Interpro domain(s) IPR005834 Haloacid dehalogenase-like hydrolase'	Cp	2	Cp	Cp	Cp	C	89.1	plastid stroma	plastid	plp_at_01453; plp_at_02424	Cp	0.96	0	No	Detected by both ITAG and Atlas
Solyc03g111700	Metallo-hydrolase/oxidoreductase superfamily protein	-	At1g29700	XP_004236302.1	MAIDCKFVPYLTPKQIVFPFPATEKVTKFKLSPACCFPFLISSYSSSLPLRPTVISAYKKNVVESNYYEDTFTLTYLEGNSWLWEVGGIKILVDPILVGNLDFGIPWLYDAAKKFVKNFQLDDLPLIHCLLITQSLDDHCHLNTLKPLSRKFPNLTVIATPNAKTLLDPLFTNVIYLEPGQDSAIEVSNGFQVKIKATAGPVLGPPWQRPENGYLVTSPKGALTLYYEPHCVYDKSTLEKHRADIVITPVIKQLLPNFTLVSGQEDAVQLAKCLFARFVVPMKNGDLDSKGLLASIVKSEGTMESFKQLLSKELPDAKVVEPTPGEPLDISIPVHGQ	5	24	5	2.831	0.0182558	480	5	3	8	'35.2'	'not assigned.not annotated'	'mercator4v5.0: not classified & original description: Inactivated Zn-dependent hydrolase of the beta-lactamase fold (AHRD V1 ***- B5ILK8_9CHRO)'	-	3	Cp	none	Cp	G	52.8	plastid	plastid	-	-	0.39	0.05	No	Detected by both ITAG and Atlas
Solyc03g111840	28 kDa ribonucleoprotein	-	At4g24770	XP_004236291.1	MSSLTKPLIKNLSMATNSCLISLPPFFTTTKSMSFISTPLKPISLSSSLSLKKTTTQFPSIVSVVAALQDDDSSVGLEDKEQGGEALSFDFASVGDAGESDEAEAEAEEYQEPPEDAKLFVGNLPYDIDSEGLAQLFQQAGVVEIAEVIYNRETDRSRGFGFVTMSTVEEAEKAVVLYNRYDLNGRLLTVNKAARRGSQPERPPRTFQPTYRIYVGNIPWDIDDARLEQVFSEHGKVVSARVVYDRESGRSRGFGFVTMSSEPEMSEAIANLDGQTLDGRTIRVNAAEERPRRNTF	7	128	7	18.953	0.122219	87	5	3	8	'16.6.3.3.2'	'RNA processing.organelle machinery.RNA homeostasis.plastidial mRNA stabilisation.ribonucleoprotein *(CP31)'	'mercator4v5.0: plastidial ribonucleoprotein *(CP31) & swissprot: 28 kDa ribonucleoprotein, chloroplastic & original description: Polyadenylate-binding protein 1-like (AHRD V1 **-- PAP1L_HUMAN); contains Interpro domain(s) IPR000504 RNA recognition motif, RNP-1'	Cp	1	Cp	possibly M	Cp	Cp	99	plastid stroma	plastid	plp_at_00437; plp_at_01507; plp_at_01678; plp_at_01860; plp_at_02442	Cp	0.95	0	No	Detected by both ITAG and Atlas
Solyc03g111850	Indole-3-glycerol phosphate synthase-like (AHRD V1 **** C8TFG9_ORYSI); contains Interpro domain(s) IPR013798 Indole-3-glycerol phosphate synthase	IGPS	At5g48220	XP_004236289.1	MDSVMPLRTTTAATATAASAAATVRPRFSFQLLANPRPRKPAFSLSVPTTIFTTHRARILPQFTPVRAQEDNSALVSESTIPEGDALKIKEWEVERFQDEIAASQGIKIRRRPTTGPPLHYVGPFEFRMQNEGNTPINILEEIIWYKDKEVSQMKEKKPLLLLKKLLSSVPPTRDFLGALRESYSRTGLPALIAEVKKASPSRGVLRENFNPVEIAKAYERGGAACLSVLTDQKYFQGSFENLEAIRNAGVECPLLCKEFVIEAWQIYYARVKGADAILLIAAVLPNLDIQYMIKICKLLGLTALVEVHDEREMDRVLGIDGVELIGINNRDLGTFKVDISNTKKLLEGERGERIREKGIIVVGESGLFTPADIGYVQEAGVKAVLVGESLVKQEDPAK…	10	42	10	2.162	0.0139417	572	5	3	8	'4.5.3.4'	'Amino acid metabolism.shikimate group amino acid biosynthesis.tryptophan.indole-3-glycerol phosphate synthase'	'mercator4v5.0: indole-3-glycerol phosphate synthase & swissprot: Indole-3-glycerol phosphate synthase, chloroplastic & original description: Indole-3-glycerol phosphate synthase-like (AHRD V1 **** C8TFG9_ORYSI); contains Interpro domain(s) IPR013798 Indole-3-glycerol phosphate synthase'	Cp	2	Cp	Cp	Cp	Cp	100	plastid stroma	plastid	plp_at_02567	Cp	0.88	0	No	Detected by both ITAG and Atlas
Solyc03g112060	Quinolite synthase A (AHRD V1 *-*- DA_CYAP4); contains Interpro domain(s) IPR003808 Fe-S metabolism associated SufE	QS	At5g50210	XP_004236277.1	MDAVNLAMKSSSSSFFLKTPCLFSSTKPISRAPSSVFTLPSTFRPLVKCIQAPFLPSPLNPDSKKPLNSVFTCSAVTSFPSQSHPNVHSGFSSAKLKLLISEFQSLIEPIDRVKRLMHYASLLPSMDGSVKTTENRVPGCTAQVWLHVSLDEEGKMRFLVDSDSEITKGFCACLVWLLDGAAPDEVLALKTEDLNALNAVGLNGKGSASRVNTWHNVLVSMQKRTRAAVAERDGKPRSELFPSMVVTADGIQPKGSYAEAQARFLFPDESRVQELVNALKEKKIGVVAHFYMDPEVQGVLTAAQKFWPHIHISDSLVMADSAVKMAKSGCQYITVLGVDFMSENVRAILDQAGFPEVGVYRMSDEHIGCSLAEAASSPSYMDYLTTASVSSPSLHVVYI…	7	23	7	1.555	0.0100274	686	5	2	7	'7.9.1.2'	'Coenzyme metabolism.NAD/NADP biosynthesis.de-novo pathway.quinolinate synthase'	'mercator4v5.0: quinolinate synthase & swissprot: Quinolinate synthase, chloroplastic & original description: Quinolinate synthase A (AHRD V1 *-*- NADA_CYAP4); contains Interpro domain(s) IPR003808 Fe-S metabolism associated SufE'	Cp	2	Cp	possibly Cp	Cp	Cp	70.5	plastid stroma	plastid	-	Cp	0.98	0.01	No	ITAG only
Solyc03g112070	Phosphoglycerate dehydrogenase (AHRD V1 **** D2D316_GOSHI); contains Interpro domain(s) IPR015508 D-3-phosphogylcerate dehydrogenase	PGDH1A	At3g19480	XP_004236276.1	MAASPSSTMILSSKSSRASLSWKNQLASTSAFRVSAVTLPRRSPRQCPRFVVFSMDAKPTVLVAEKLGEAGLKLLKEFANVDCSYNLTPEELCTKISLCDALVVRSGTKVTREIFESSGGRLKVVGRAGVGIDNVDLAAATEHGCLVVNAPTANTVAAAEHGIALLTAMARNVAQADASVKAGKWLRNKYVGVSLVGKTLAVMGFGKVGSEVARRAKGLGMHVIAHDPYAPADRARAIGVQLVSFDEALASADFISLHMPLTPATKQILNDETFAKMKKGVRIVNVARGGVIDEEALVRALDAGIVAQAALDVFTVEPPPKDSKLIQHENVTATPHLGASTTEAQEGVAIEVAEAVVGALKGELSATAVNAPMVPAEVLLELKPFVVLAEKLGRLAVQL…	17	92	10	8.12	0.052362	199	5	3	8	'50.1.1'	'Enzyme classification.EC_1 oxidoreductases.EC_1.1 oxidoreductase acting on CH-OH group of donor'	'mercator4v5.0: EC_1.1 oxidoreductase acting on CH-OH group of donor & swissprot: D-3-phosphoglycerate dehydrogenase 1, chloroplastic & original description: Phosphoglycerate dehydrogenase (AHRD V1 **** D2D316_GOSHI); contains Interpro domain(s) IPR015508 D-3-phosphogylcerate Dehydrogenase'	Cp	2	Cp	Cp	Cp	Cp	70.7	plastid stroma	plastid	-	Cp	0.99	0	No	Detected by both ITAG and Atlas
[truncated: 869 more rows]

## Sheet: Table S2B. Problem genes
Table S2B. Tomato genes that had problematic annotations in the S. lycopersicum genome ver 2.1 or 4.0
	Gene ID	New Gene ID
Genes with new gene Solyc accessions in ver 4.0	Solyc00g005840.2.1	Solyc07g032786.1.1
	Solyc00g006800.2.1	Solyc11g033288.1.1
	Solyc00g006810.2.1	Solyc11g033284.1.1
	Solyc00g009100.2.1	Solyc04g072036.1.1
	Solyc00g024150.2.1	Solyc03g094175.11 Solyc02g005510.4.1
	Solyc00g136560.2.1	Solyc10g085140.2.1
	Solyc00g187050.2.1	Solyc12g010030.1.1
[truncated: 56 more rows]
