# Supplementary material for: The tomato chloroplast stromal proteome compendium elucidated by leveraging a plastid protein-localization prediction Atlas
Source: Front Plant Sci. 2023 Aug 28;14:1020275. doi: 10.3389/fpls.2023.1020275 (PMC10493611; doi:10.3389/fpls.2023.1020275)
Supplement: Supplementary file 5 [file Table_3.xlsx]

## Sheet: Table S3A 
Table S3A: The tomato chloroplast protein Atlas includes 7,473 tomato nuclear-genome and plastid-genome encoded proteins: Localization predictions by TargetP, ChloroP, Predotar, Wolf PSORT, and YLoc.
Sol Genomics IDA	Descriptor	TargetPB	TargetP Reliability Class	ChloroP (transit peptide predicted)C	PredotarD	WoLF PSORTF	WoLF PSORT chloroplast prediction number of proteinsE	YLoc locationE	YLoc % confidence
544163593	photosystem II protein D1 (chloroplast) [Solanum lycopersicum]	-	-	-	-	-	-	-	-
544163594	maturase K (chloroplast) [Solanum lycopersicum]	-	-	-	-	-	-	-	-
544163595	ribosomal protein S16 (chloroplast) [Solanum lycopersicum]	-	-	-	-	-	-	-	-
544163596	photosystem II protein K (chloroplast) [Solanum lycopersicum]	-	-	-	-	-	-	-	-
544163597	photosystem II protein I (chloroplast) [Solanum lycopersicum]	-	-	-	-	-	-	-	-
544163598	ATP synthase CF1 alpha subunit (chloroplast) [Solanum lycopersicum]	-	-	-	-	-	-	-	-
544163599	ATP synthase CF0 subunit I (chloroplast) [Solanum lycopersicum]	-	-	-	-	-	-	-	-
544163600	ATP synthase CF0 subunit III (chloroplast) [Solanum lycopersicum]	-	-	-	-	-	-	-	-
544163601	ATP synthase CF0 subunit IV (chloroplast) [Solanum lycopersicum]	-	-	-	-	-	-	-	-
544163602	ribosomal protein S2 (chloroplast) [Solanum lycopersicum]	-	-	-	-	-	-	-	-
544163603	RNA polymerase beta' subunit (chloroplast) [Solanum lycopersicum]	-	-	-	-	-	-	-	-
544163604	RNA polymerase beta subunit (chloroplast) [Solanum lycopersicum]	-	-	-	-	-	-	-	-
544163605	RNA polymerase beta subunit (chloroplast) [Solanum lycopersicum]	-	-	-	-	-	-	-	-
544163606	cytochrome b6/f complex subunit VIII (chloroplast) [Solanum lycopersicum]	-	-	-	-	-	-	-	-
544163607	photosystem II protein M (chloroplast) [Solanum lycopersicum]	-	-	-	-	-	-	-	-
544163608	photosystem II protein D2 (chloroplast) [Solanum lycopersicum]	-	-	-	-	-	-	-	-
544163609	photosystem II plastid43 chlorophyll apoprotein (chloroplast) [Solanum lycopersicum]	-	-	-	-	-	-	-	-
544163610	photosystem II protein Z (chloroplast) [Solanum lycopersicum]	-	-	-	-	-	-	-	-
544163611	ribosomal protein S14 (chloroplast) [Solanum lycopersicum]	-	-	-	-	-	-	-	-
544163612	photosystem I P700 apoprotein A2 (chloroplast) [Solanum lycopersicum]	-	-	-	-	-	-	-	-
544163613	photosystem I P700 apoprotein A1 (chloroplast) [Solanum lycopersicum]	-	-	-	-	-	-	-	-
544163614	photosystem I assembly protein ycf3 (chloroplast) [Solanum lycopersicum]	-	-	-	-	-	-	-	-
544163615	ribosomal protein S4 (chloroplast) [Solanum lycopersicum]	-	-	-	-	-	-	-	-
544163616	NADH_plastoquinone oxidoreductase subunit J (chloroplast) [Solanum lycopersicum]	-	-	-	-	-	-	-	-
544163617	NADH_plastoquinone oxidoreductase subunit K (chloroplast) [Solanum lycopersicum]	-	-	-	-	-	-	-	-
544163618	NADH_plastoquinone oxidoreductase subunit 3 (chloroplast) [Solanum lycopersicum]	-	-	-	-	-	-	-	-
544163619	ATP synthase CF1 epsilon subunit (chloroplast) [Solanum lycopersicum]	-	-	-	-	-	-	-	-
544163620	ATP synthase CF1 beta subunit (chloroplast) [Solanum lycopersicum]	-	-	-	-	-	-	-	-
544163621	ribulose_1,5_bisphosphate carboxylase/oxygenase large subunit (chloroplast) [Solanum lycopersicum]	-	-	-	-	-	-	-	-
544163622	acetyl_CoA carboxylase carboxyltransferase beta subunit (chloroplast) [Solanum lycopersicum]	-	-	-	-	-	-	-	-
544163623	photosystem I subunit VIII (chloroplast) [Solanum lycopersicum]	-	-	-	-	-	-	-	-
544163624	photosystem I assembly protein ycf4 (chloroplast) [Solanum lycopersicum]	-	-	-	-	-	-	-	-
544163625	chloroplast envelope membrane protein (chloroplast) [Solanum lycopersicum]	-	-	-	-	-	-	-	-
544163626	cytochrome f (chloroplast) [Solanum lycopersicum]	-	-	-	-	-	-	-	-
544163627	photosystem II protein J (chloroplast) [Solanum lycopersicum]	-	-	-	-	-	-	-	-
544163628	photosystem II protein L, partial (chloroplast) [Solanum lycopersicum]	-	-	-	-	-	-	-	-
544163629	photosystem II cytochrome b559 beta subunit (chloroplast) [Solanum lycopersicum]	-	-	-	-	-	-	-	-
544163630	photosystem II cytochrome b559 alpha subunit (chloroplast) [Solanum lycopersicum]	-	-	-	-	-	-	-	-
544163631	cytochrome b6/f complex subunit VI (chloroplast) [Solanum lycopersicum]	-	-	-	-	-	-	-	-
544163632	cytochrome b6/f complex subunit V (chloroplast) [Solanum lycopersicum]	-	-	-	-	-	-	-	-
544163633	photosystem I subunit IX (chloroplast) [Solanum lycopersicum]	-	-	-	-	-	-	-	-
544163634	ribosomal protein L33 (chloroplast) [Solanum lycopersicum]	-	-	-	-	-	-	-	-
544163635	ribosomal protein S18 (chloroplast) [Solanum lycopersicum]	-	-	-	-	-	-	-	-
544163636	ribosomal protein L20 (chloroplast) [Solanum lycopersicum]	-	-	-	-	-	-	-	-
544163637	clp protease proteolytic subunit (chloroplast) [Solanum lycopersicum]	-	-	-	-	-	-	-	-
544163638	photosystem II plastid47 chlorophyll apoprotein (chloroplast) [Solanum lycopersicum]	-	-	-	-	-	-	-	-
544163639	photosystem II protein T (chloroplast) [Solanum lycopersicum]	-	-	-	-	-	-	-	-
544163640	photosystem II protein N (chloroplast) [Solanum lycopersicum]	-	-	-	-	-	-	-	-
544163641	photosystem II phosphoprotein (chloroplast) [Solanum lycopersicum]	-	-	-	-	-	-	-	-
544163642	cytochrome b6 (chloroplast) [Solanum lycopersicum]	-	-	-	-	-	-	-	-
544163643	cytochrome b6/f complex subunit IV (chloroplast) [Solanum lycopersicum]	-	-	-	-	-	-	-	-
544163644	RNA polymerase alpha subunit (chloroplast) [Solanum lycopersicum]	-	-	-	-	-	-	-	-
544163645	ribosomal protein S11 (chloroplast) [Solanum lycopersicum]	-	-	-	-	-	-	-	-
544163646	ribosomal protein L36 (chloroplast) [Solanum lycopersicum]	-	-	-	-	-	-	-	-
544163647	translational initiation factor 1 (chloroplast) [Solanum lycopersicum]	-	-	-	-	-	-	-	-
544163648	ribosomal protein S8 (chloroplast) [Solanum lycopersicum]	-	-	-	-	-	-	-	-
544163649	ribosomal protein L14 (chloroplast) [Solanum lycopersicum]	-	-	-	-	-	-	-	-
544163650	ribosomal protein L16 (chloroplast) [Solanum lycopersicum]	-	-	-	-	-	-	-	-
544163651	ribosomal protein S3 (chloroplast) [Solanum lycopersicum]	-	-	-	-	-	-	-	-
544163652	ribosomal protein L22 (chloroplast) [Solanum lycopersicum]	-	-	-	-	-	-	-	-
544163653	ribosomal protein S19 (chloroplast) [Solanum lycopersicum]	-	-	-	-	-	-	-	-
544163654	ribosomal protein L2 (chloroplast) [Solanum lycopersicum]	-	-	-	-	-	-	-	-
544163655	ribosomal protein L23 (chloroplast) [Solanum lycopersicum]	-	-	-	-	-	-	-	-
544163656	hypothetical chloroplast RF2 (chloroplast) [Solanum lycopersicum]	-	-	-	-	-	-	-	-
544163657	hypothetical chloroplast RF15 (chloroplast) [Solanum lycopersicum]	-	-	-	-	-	-	-	-
544163658	NADH_plastoquinone oxidoreductase subunit 2 (chloroplast) [Solanum lycopersicum]	-	-	-	-	-	-	-	-
544163659	ribosomal protein S7 (chloroplast) [Solanum lycopersicum]	-	-	-	-	-	-	-	-
544163660	ribosomal protein S12 (chloroplast) [Solanum lycopersicum]	-	-	-	-	-	-	-	-
544163661	NADH_plastoquinone oxidoreductase subunit 5 (chloroplast) [Solanum lycopersicum]	-	-	-	-	-	-	-	-
544163662	ribosomal protein L32 (chloroplast) [Solanum lycopersicum]	-	-	-	-	-	-	-	-
544163663	cytochrome c heme attachment protein (chloroplast) [Solanum lycopersicum]	-	-	-	-	-	-	-	-
544163664	NADH_plastoquinone oxidoreductase subunit 4, partial (chloroplast) [Solanum lycopersicum]	-	-	-	-	-	-	-	-
544163665	photosystem I subunit VII (chloroplast) [Solanum lycopersicum]	-	-	-	-	-	-	-	-
544163666	NADH_plastoquinone oxidoreductase subunit 4L (chloroplast) [Solanum lycopersicum]	-	-	-	-	-	-	-	-
544163667	NADH_plastoquinone oxidoreductase subunit 6 (chloroplast) [Solanum lycopersicum]	-	-	-	-	-	-	-	-
544163668	NADH_plastoquinone oxidoreductase subunit I (chloroplast) [Solanum lycopersicum]	-	-	-	-	-	-	-	-
544163669	NADH_plastoquinone oxidoreductase subunit 1 (chloroplast) [Solanum lycopersicum]	-	-	-	-	-	-	-	-
544163670	NADH_plastoquinone oxidoreductase subunit 7 (chloroplast) [Solanum lycopersicum]	-	-	-	-	-	-	-	-
544163671	ribosomal protein S15 (chloroplast) [Solanum lycopersicum]	-	-	-	-	-	-	-	-
544163672	hypothetical chloroplast RF1 (chloroplast) [Solanum lycopersicum]	-	-	-	-	-	-	-	-
544163673	ribosomal protein S12 (chloroplast) [Solanum lycopersicum]	-	-	-	-	-	-	-	-
544163674	ribosomal protein S7 (chloroplast) [Solanum lycopersicum]	-	-	-	-	-	-	-	-
544163675	NADH_plastoquinone oxidoreductase subunit 2 (chloroplast) [Solanum lycopersicum]	-	-	-	-	-	-	-	-
544163676	hypothetical chloroplast RF15 (chloroplast) [Solanum lycopersicum]	-	-	-	-	-	-	-	-
544163677	hypothetical chloroplast RF2 (chloroplast) [Solanum lycopersicum]	-	-	-	-	-	-	-	-
544163678	ribosomal protein L23 (chloroplast) [Solanum lycopersicum]	-	-	-	-	-	-	-	-
544163679	ribosomal protein L2 (chloroplast) [Solanum lycopersicum]	-	-	-	-	-	-	-	-
Solyc00g005020.1.1	Unknown Protein (AHRD V1)	plastid	5	-	ER	not plastid	0	EX	66.5
Solyc00g005430.1.1	Unknown Protein (AHRD V1)	S	2	Y	-	plastid	5	V	86
Solyc00g005840.2.1	Thioredoxin family protein (AHRD V1 ***- D7MCJ1_ARALY); contains Interpro domain(s) IPR015467 Thioredoxin, core	plastid	2	Y	plastid	plastid	12	plastid	99.8
Solyc00g005870.1.1	Mutator-like transposase (AHRD V1 *-*- Q94HK4_ORYSA); contains Interpro domain(s) IPR006564 Zinc finger, PMZ-type	-	4	-	possibly plastid	plastid	2	C	88.3
Solyc00g005900.1.1	Oxygen-evolving enhancer protein 1, chloroplastic (AHRD V1 ***- PSBO_SOLTU); contains Interpro domain(s) IPR002628 Photosystem II manganese-stabilizing protein PsbO	-	5	-	possibly plastid	plastid	5	plastid	100
Solyc00g006050.1.1	Unknown Protein (AHRD V1); contains Interpro domain(s) IPR001457 NADH:ubiquinone/plastoquinone oxidoreductase, chain 6	S	3	Y	ER	plastid	3	PM	98.7
Solyc00g006510.1.1	Unknown Protein (AHRD V1)	plastid	4	-	none	not plastid	0	N	95.9
Solyc00g006520.1.1	Unknown Protein (AHRD V1)	plastid	1	Y	plastid	plastid	5	N	98.5
Solyc00g006680.1.1	Plant senescence-associated protein (Fragment) (AHRD V1 *-*- D7PDP5_9HYPO)	plastid	5	-	none	plastid	4	N	75.8
Solyc00g006800.2.1	Transaldolase (AHRD V1 ***- Q9FVH1_SOLLC); contains Interpro domain(s) IPR014634 Transaldolase, bacterial/plant type	plastid	1	Y	plastid	plastid	12	C	84.4
Solyc00g006810.2.1	Peptidyl-prolyl cis-trans isomerase (AHRD V1 *-*- Q8DJW8_THEEB); contains Interpro domain(s) IPR001179 Peptidyl-prolyl cis-trans isomerase, FKBP-type	plastid	1	Y	plastid	plastid	17	plastid	99.9972
Solyc00g006830.2.1	No exine formation-1 (AHRD V1 **-- Q9LYR7_ARATH)	plastid	2	Y	none	not plastid	0	plastid	48.1747
Solyc00g007060.2.1	Serine/threonine kinase-like protein ABC1063 (AHRD V1 **** Q1KMP8_HORVD); contains Interpro domain(s) IPR002290 Serine/threonine protein kinase	plastid	1	Y	none	not plastid	0	C	61.789
Solyc00g007130.2.1	Amino acid transporter family protein (AHRD V1 **** D7LI10_ARALY); contains Interpro domain(s) IPR013057 Amino acid transporter, transmembrane	-	4	Y	none	plastid	11	PM	98.4614
Solyc00g007150.2.1	Unknown Protein (AHRD V1)	M	2	Y	-	plastid	7	N	93.6718
Solyc00g007950.1.1	Unknown Protein (AHRD V1)	M	3	-	plastid	plastid	4	M	89.1028
Solyc00g007960.1.1	Unknown Protein (AHRD V1)	plastid	5	-	none	plastid	7	EX	97.94
Solyc00g007980.1.1	Unknown Protein (AHRD V1)	M	4	-	plastid	not plastid	0	plastid	42.1595
Solyc00g008010.1.1	Unknown Protein (AHRD V1)	M	5	-	plastid	plastid	9	EX	91.9614
Solyc00g008050.1.1	Unknown Protein (AHRD V1)	-	3	-	possibly plastid	plastid	7	plastid	96.737
Solyc00g008060.1.1	Unknown Protein (AHRD V1)	-	2	-	possibly plastid	plastid	1	M	54.4278
Solyc00g008080.1.1	Unknown Protein (AHRD V1)	M	3	Y	M	plastid	9	plastid	78.7309
Solyc00g008100.1.1	Unknown Protein (AHRD V1)	-	5	-	possibly plastid	plastid	5	C	42.359
Solyc00g008110.1.1	Unknown Protein (AHRD V1)	M	3	Y	none	plastid	7	G	73.2559
Solyc00g008900.1.1	Unknown Protein (AHRD V1)	plastid	5	-	-	plastid	4	C	94.8996
Solyc00g009040.2.1	Polyadenylate-binding protein 2 (AHRD V1 **** B6U4M0_MAIZE); contains Interpro domain(s) IPR006515 Polyadenylate binding protein, human types 1, 2, 3, 4	S	3	Y	possibly plastid	not plastid	0	ER	33.105
Solyc00g009050.1.1	UPF0544 protein C5orf45 (AHRD V1 ***- CE045_HUMAN)	plastid	4	Y	plastid	plastid	11	N	64.4723
Solyc00g009060.2.1	Hypoxanthine phosphoribosyltransferase (AHRD V1 ***- B4UWA8_ARAHY); contains Interpro domain(s) IPR005904 Hypoxanthine phosphoribosyl transferase	plastid	5	-	none	plastid	4	C	99.7266
Solyc00g009080.2.1	Unknown Protein (AHRD V1)	plastid	5	Y	M	plastid	2	M	91.5708
Solyc00g009100.2.1	30S ribosomal protein S1-like (AHRD V1 ***- Q5ZC75_ORYSJ); contains Interpro domain(s) IPR003029 Ribosomal protein S1, RNA binding domain	S	3	Y	none	plastid	14	V	66.6447
Solyc00g009660.1.1	Unknown Protein (AHRD V1)	plastid	5	-	-	plastid	9	C	42.2726
Solyc00g009760.2.1	Cytochrome P450 monooxygenase (Fragment) (AHRD V1 *-*- Q6T4Q1_PYRCO)	plastid	2	Y	possibly plastid	not plastid	0	N	86.7772
Solyc00g009770.1.1	Unknown Protein (AHRD V1)	plastid	2	Y	none	not plastid	0	N	66.1313
Solyc00g010210.1.1	Polyprotein (AHRD V1 ***- Q94HW2_ARATH)	plastid	2	Y	none	not plastid	0	plastid	81.8755
Solyc00g010420.1.1	Unknown Protein (AHRD V1)	plastid	5	-	-	plastid	6	N	84.2692
Solyc00g010930.1.1	Unknown Protein (AHRD V1)	plastid	5	-	-	plastid	4	C	98.6481
Solyc00g011550.1.1	B3 domain-containing protein At1g49475 (AHRD V1 *-*- Y1475_ARATH); contains Interpro domain(s) IPR003340 Transcriptional factor B3	plastid	3	-	none	plastid	2	N	99.8329
Solyc00g011660.1.1	B3 domain-containing protein At1g49475 (AHRD V1 *-*- Y1475_ARATH); contains Interpro domain(s) IPR003340 Transcriptional factor B3	plastid	5	-	none	not plastid	0	N	97.8002
Solyc00g011880.2.1	AIG2-like protein (AHRD V1 ***- B4FVZ7_MAIZE); contains Interpro domain(s) IPR009288 AIG2-like	S	3	-	ER	not plastid	0	plastid	94.7452
Solyc00g012440.1.1	TO54-2 (Fragment) (AHRD V1 ***- Q3LVL5_TAROF)	-	4	Y	none	plastid	3	C	73.3783
Solyc00g012690.1.1	Ovarian tumour otubain (AHRD V1 ***- Q1SL15_MEDTR); contains Interpro domain(s) IPR018289 MULE transposase, conserved domain	-	2	-	possibly plastid	not plastid	0	C	59.4892
Solyc00g013130.2.1	NADH-quinone oxidoreductase subunit N (AHRD V1 ***- Q7CZK9_AGRT5); contains Interpro domain(s) IPR001750 NADH:ubiquinone/plastoquinone oxidoreductase	-	2	-	none	not plastid	0	plastid	80.7107
Solyc00g013150.1.1	Unknown Protein (AHRD V1)	plastid	2	Y	none	plastid	10	M	96.8082
Solyc00g013190.1.1	Unknown Protein (AHRD V1)	plastid	5	-	none	plastid	5	C	98.0406
Solyc00g013320.1.1	Unknown Protein (AHRD V1)	M	5	-	plastid	plastid	9	C	44.8709
Solyc00g014790.2.1	Unknown Protein (AHRD V1)	plastid	5	-	none	not plastid	0	C	84.9928
Solyc00g014800.1.1	Zinc-finger protein 1 (AHRD V1 *-*- D7KX25_ARALY); contains Interpro domain(s) IPR007087 Zinc finger, C2H2-type	-	4	Y	none	plastid	1	N	99.9613
Solyc00g014820.2.1	Unknown Protein (AHRD V1)	-	5	Y	possibly M	plastid	5	M	75.0055
Solyc00g014840.1.1	Unknown Protein (AHRD V1)	plastid	4	Y	none	plastid	10	plastid	62.1677
Solyc00g015720.1.1	Glycosyltransferase-like protein (AHRD V1 **-- D8QTD2_SELML); contains Interpro domain(s) IPR006740 Protein of unknown function DUF604	-	2	Y	possibly plastid	plastid	8	PM	65.8708
Solyc00g016480.1.1	HAT family dimerisation domain containing protein (AHRD V1 **-- Q53M48_ORYSJ)	M	5	Y	ER	plastid	7	G	50.6926
Solyc00g017210.1.1	Actin (AHRD V1 ***- P93775_STRAF); contains Interpro domain(s) IPR004000 Actin/actin-like	-	3	Y	none	plastid	3	C	93.7387
Solyc00g019620.1.1	PDZ domain containing protein (Fragment) (AHRD V1 *--- A8PIU5_BRUMA); contains Interpro domain(s) IPR001478 PDZ/DHR/GLGF	plastid	5	Y	possibly M	plastid	3	C	61.1876
Solyc00g019950.1.1	NADH-quinone oxidoreductase subunit C (AHRD V1 ***- NUOC_MAGSA); contains Interpro domain(s) IPR001268 NADH:ubiquinone oxidoreductase, 30 kDa subunit	-	1	-	possibly plastid	not plastid	0	C	94.2035
Solyc00g019970.2.1	Unknown Protein (AHRD V1)	plastid	4	Y	possibly plastid	plastid	11	plastid	91.3085
Solyc00g020020.2.1	Unknown Protein (AHRD V1)	plastid	5	-	possibly M	plastid	9	M	99.7242
Solyc00g020440.1.1	Unknown Protein (AHRD V1)	-	5	-	possibly plastid	not plastid	0	EX	56.5616
Solyc00g020960.1.1	Unknown Protein (AHRD V1)	M	4	-	possibly plastid	plastid	9	plastid	50.4772
Solyc00g020970.1.1	RING finger protein 13 (AHRD V1 *-*- RNF13_CHICK); contains Interpro domain(s) IPR018957 Zinc finger, C3HC4 RING-type	S	3	Y	ER	plastid	2	V	80.0136
Solyc00g021630.1.1	NADH-ubiquinone oxidoreductase chain 6 (Fragment) (AHRD V1 ***- Q2PZB4_BRAOB); contains Interpro domain(s) IPR001457 NADH:ubiquinone/plastoquinone oxidoreductase, chain 6	S	3	Y	ER	plastid	7	PM	98.1436
Solyc00g021650.1.1	Unknown Protein (AHRD V1)	M	3	Y	possibly ER	plastid	12	EX	89.1362
Solyc00g022080.1.1	Unknown Protein (AHRD V1)	M	4	-	possibly plastid	plastid	6	M	71.2241
Solyc00g022920.1.1	Phosphoribosylaminoimidazole carboxylase like protein (AHRD V1 ***- Q84TI2_ARATH); contains Interpro domain(s) IPR013817 Pre-ATP-grasp fold	plastid	3	Y	plastid	plastid	12	plastid	99.9743
Solyc00g023250.1.1	Short-chain dehydrogenase/reductase family protein (AHRD V1 ***- D7LJU7_ARALY); contains Interpro domain(s) IPR002347 Glucose/ribitol dehydrogenase	-	1	-	none	not plastid	0	plastid	89.0745
Solyc00g023270.1.1	Origin recognition complex subunit 2 (AHRD V1 *-*- Q9XFD6_ORYSJ); contains Interpro domain(s) IPR007220 Origin recognition complex subunit 2	-	3	Y	none	not plastid	0	N	56.1004
Solyc00g023570.1.1	Unknown Protein (AHRD V1)	plastid	2	Y	M	plastid	13	plastid	96.2378
Solyc00g023580.1.1	Unknown Protein (AHRD V1)	-	5	Y	possibly M	plastid	6	plastid	50.0354
Solyc00g023600.1.1	Unknown Protein (AHRD V1)	-	5	-	plastid	plastid	4	N	69.3406
Solyc00g023700.2.1	Unknown Protein (AHRD V1)	M	3	Y	none	plastid	11	M	95.541
Solyc00g024040.1.1	Thiamine-monophosphate kinase (AHRD V1 ***- C6X363_FLAB3); contains Interpro domain(s) IPR006283 Thiamine-monophosphate kinase	-	3	-	possibly M	plastid	3	plastid	27.1184
Solyc00g024150.2.1	Pterin-4-alpha-carbinolamine dehydratase (AHRD V1 *-** B6T9C1_MAIZE); contains Interpro domain(s) IPR001533 Transcriptional coactivator/pterin dehydratase	plastid	1	Y	plastid	plastid	13	plastid	99.6945
Solyc00g024160.1.1	ATP binding protein (AHRD V1 **-- D7MPZ5_ARALY); contains Interpro domain(s) IPR001841 Zinc finger, RING-type	plastid	5	-	none	plastid	2	N	98.9928
Solyc00g024670.1.1	Beta-1-3-galactosyl-o-glycosyl-glycoprotein (AHRD V1 **-* B6Z261_WHEAT); contains Interpro domain(s) IPR003406 Glycosyl transferase, family 14	plastid	5	Y	possibly M	plastid	6	G	99.5379
Solyc00g024690.1.1	Dof zinc finger protein DOF2.4 (AHRD V1 ***- DOF24_ARATH)	plastid	3	Y	none	plastid	1	N	96.9472
Solyc00g025500.1.1	Transcriptional regulator GntR-family (AHRD V1 ***- A9I3B6_BORPD); contains Interpro domain(s) IPR011711 GntR, C-terminal	plastid	4	Y	none	plastid	10	N	54.4618
Solyc00g025520.1.1	Unknown Protein (AHRD V1)	plastid	4	Y	plastid	plastid	8	plastid	98.3789
Solyc00g025540.1.1	Transcriptional regulator LysR family (AHRD V1 ***- A7IJH0_XANP2); contains Interpro domain(s) IPR005119 LysR, substrate-binding	plastid	5	Y	none	plastid	9	M	94.3276
Solyc00g026900.1.1	Unknown Protein (AHRD V1)	-	5	Y	none	plastid	4	plastid	70.7431
Solyc00g027130.1.1	Sentrin-specific protease 2 (AHRD V1 *-*- SENP2_HUMAN); contains Interpro domain(s) IPR003653 Peptidase C48, SUMO/Sentrin/Ubl1	M	2	Y	none	not plastid	0	P	55.314
Solyc00g027970.1.1	Abhydrolase domain-containing protein FAM108B1 (AHRD V1 **-- C0HAS5_SALSA); contains Interpro domain(s) IPR000073 Alpha/beta hydrolase fold-1	plastid	1	Y	plastid	plastid	5	plastid	84.9717
Solyc00g028110.1.1	Rhs element Vgr protein (AHRD V1 **-- A6V8B8_PSEA7); contains Interpro domain(s) IPR017847 Rhs element Vgr protein, subgroup	M	4	Y	none	plastid	10	plastid	62.9827
Solyc00g029070.1.1	Unknown Protein (AHRD V1)	plastid	3	Y	none	not plastid	0	N	93.8764
Solyc00g029290.1.1	High mobility group protein (AHRD V1 *-*- A8HXE1_CHLRE); contains Interpro domain(s) IPR000910 High mobility group, HMG1/HMG2	plastid	5	-	none	plastid	1	N	99.9993
Solyc00g029300.1.1	Vacuolar sorting-associated protein (AHRD V1 *-*- C0NCK1_AJECG)	plastid	5	-	none	not plastid	0	C	65.9436
Solyc00g030100.1.1	Unknown Protein (AHRD V1)	plastid	4	-	-	plastid	2	C	93.7415
Solyc00g031360.1.1	D-serine dehydratase (AHRD V1 ***- A3LDF4_PSEAE); contains Interpro domain(s) IPR011780 D-serine ammonia-lyase	plastid	3	Y	none	plastid	6	plastid	95.8161
Solyc00g031370.1.1	Transcriptional regulator (AHRD V1 ***- A3NNQ2_BURP6); contains Interpro domain(s) IPR005119 LysR, substrate-binding	S	4	-	possibly ER	plastid	6	C	79.824
Solyc00g031490.1.1	Unknown Protein (AHRD V1)	plastid	3	Y	plastid	plastid	6	plastid	98.4681
Solyc00g031500.1.1	Unknown Protein (AHRD V1)	plastid	3	Y	none	plastid	13	C	77.6431
Solyc00g031710.1.1	Unknown Protein (AHRD V1)	plastid	3	-	M	plastid	4	M	68.5932
Solyc00g031720.1.1	Copper-translocating P-type ATPase (AHRD V1 ***- B8LAF8_9GAMM); contains Interpro domain(s) IPR006121 Heavy metal transport/detoxification protein	plastid	5	-	none	plastid	3	C	99.9453
Solyc00g034010.1.1	Unknown Protein (AHRD V1)	-	5	Y	none	plastid	1	N	72.1882
Solyc00g035010.1.1	C2H2 finger domain-containing protein (AHRD V1 *--- C6HL38_AJECH)	plastid	5	-	possibly plastid	plastid	6	N	57.5298
Solyc00g036540.1.1	50S ribosomal protein L2 chloroplastic (AHRD V1 *-*- A6YA71_9MAGN); contains Interpro domain(s) IPR002171 Ribosomal protein L2	S	5	-	none	plastid	3	C	99.2063
Solyc00g044350.2.1	EPIDERMAL PATTERNING FACTOR-like protein 1 (AHRD V1 ***- EPFL1_ARATH)	plastid	2	Y	none	plastid	3	C	60.4586
Solyc00g049920.1.1	3-oxoacyl-reductase (AHRD V1 **-- B1BY37_CLOPE); contains Interpro domain(s) IPR002347 Glucose/ribitol dehydrogenase	-	5	-	possibly M	not plastid	0	plastid	98.4857
Solyc00g056180.1.1	Unknown Protein (AHRD V1)	S	4	-	none	plastid	6	plastid	55.5765
Solyc00g056680.1.1	Lipase-like protein (AHRD V1 ***- Q949E1_ORYSA); contains Interpro domain(s) IPR002921 Lipase, class 3	M	5	Y	possibly plastid	plastid	13	M	75.2618
Solyc00g062710.1.1	Unknown Protein (AHRD V1)	plastid	5	Y	none	plastid	7	C	78.7278
Solyc00g065610.1.1	Unknown Protein (AHRD V1)	plastid	4	-	plastid	plastid	10	plastid	60.5426
Solyc00g065620.1.1	Unknown Protein (AHRD V1)	plastid	5	Y	none	plastid	5	plastid	57.9327
Solyc00g066140.1.1	YdiU protein (AHRD V1 ***- C5W4G9_ECOBB); contains Interpro domain(s) IPR003846 Uncharacterised protein family UPF0061	-	2	Y	none	not plastid	0	C	83.9472
Solyc00g066370.1.1	Unknown Protein (AHRD V1)	S	3	Y	-	plastid	4	plastid	88.4493
Solyc00g067470.1.1	Unknown Protein (AHRD V1)	S	3	Y	-	plastid	8	V	91.5949
Solyc00g071600.1.1	GTPase activating protein (AHRD V1 ***- A8N3R7_COPC7)	M	4	Y	none	not plastid	0	C	55.0751
Solyc00g072400.2.1	Peroxidase 1 (AHRD V1 ***- A0SWU6_SESRO); contains Interpro domain(s) IPR002016 Haem peroxidase, plant/fungal/bacterial	S	1	Y	ER	plastid	5	EX	58.4202
Solyc00g073910.1.1	Unknown Protein (AHRD V1)	M	1	Y	M	not plastid	0	N	59.4463
Solyc00g075450.2.1	Unknown Protein (AHRD V1)	plastid	2	Y	none	plastid	8	V	90.4599
Solyc00g084870.2.1	Tplastid family transcription factor (AHRD V1 *-** A6MCZ2_9ORYZ); contains Interpro domain(s) IPR005333 Transcription factor, Tplastid	plastid	3	Y	possibly plastid	plastid	4	plastid	51.642
Solyc00g085780.1.1	Unknown Protein (AHRD V1)	M	4	Y	M	plastid	5	M	68.6944
Solyc00g090660.1.1	Unknown Protein (AHRD V1)	plastid	5	-	none	not plastid	0	C	93.892
Solyc00g090860.1.1	Nitrate transporter (AHRD V1 ***- O04431_NIplastidL); contains Interpro domain(s) IPR016196 Major facilitator superfamily, general substrate transporter	-	3	-	none	plastid	4	plastid	91.5994
Solyc00g092890.1.1	Unknown Protein (AHRD V1)	plastid	5	Y	none	plastid	13	M	90.3126
Solyc00g092900.1.1	Unknown Protein (AHRD V1)	M	5	-	possibly plastid	plastid	3	C	60.947
Solyc00g094010.1.1	Virulence VirF2 protein (AHRD V1 **-- Q2K2J5_RHIEC)	plastid	5	Y	possibly plastid	plastid	7	N	90.9994
Solyc00g095460.1.1	Isoflavone reductase family protein (AHRD V1 ***- B0YDY6_ASPFC); contains Interpro domain(s) IPR016040 NAD(P)-binding domain	plastid	5	-	ER	plastid	7	V	55.319
Solyc00g096060.1.1	Ectonucleoside triphosphate diphosphohydrolase 6 (AHRD V1 **-- Q6YHK4_CAVPO); contains Interpro domain(s) IPR000407 Nucleoside phosphatase GDA1/CD39	-	4	-	none	plastid	5	plastid	62.1885
Solyc00g097960.1.1	Unknown Protein (AHRD V1)	plastid	3	-	none	plastid	13	N	65.3637
Solyc00g099160.1.1	Unknown Protein (AHRD V1)	plastid	2	Y	none	plastid	6	N	87.906
Solyc00g099460.1.1	Unknown Protein (AHRD V1)	plastid	2	Y	none	plastid	4	plastid	76.4358
Solyc00g099470.1.1	Predicted CDS Pa_2_8820 (AHRD V1 *-*- B2B6U4_PODAN)	plastid	3	Y	possibly plastid	plastid	6	N	54.6074
Solyc00g100880.2.1	GTP binding protein (AHRD V1 **-- B6TE93_MAIZE); contains Interpro domain(s) IPR007612 Protein of unknown function DUF567	plastid	2	Y	possibly plastid	plastid	13	C	57.0188
Solyc00g104320.1.1	Unknown Protein (AHRD V1)	-	3	-	none	plastid	4	plastid	76.0528
Solyc00g106650.1.1	BZIP transcription factor family protein expressed (AHRD V1 *--- Q2R8T2_ORYSJ)	plastid	5	Y	none	plastid	2	C	87.4274
Solyc00g109860.1.1	Unknown Protein (AHRD V1)	M	5	-	possibly M	plastid	13	plastid	45.9229
Solyc00g110070.1.1	C2H2 finger domain-containing protein (AHRD V1 ***- C5JWJ2_AJEDS); contains Interpro domain(s) IPR007087 Zinc finger, C2H2-type	plastid	5	-	none	plastid	3	N	99.9185
Solyc00g111270.1.1	Unknown Protein (AHRD V1)	plastid	3	Y	plastid	plastid	6	C	53.1733
Solyc00g111370.1.1	Unknown Protein (AHRD V1)	M	4	Y	M	plastid	5	N	97.5865
Solyc00g112490.1.1	Hemagglutinin-related autotransporter protein (AHRD V1 **-- B5SEL8_RALSO); contains Interpro domain(s) IPR008009 Putative Ig	plastid	5	Y	possibly plastid	plastid	14	plastid	85.7922
Solyc00g112710.1.1	Unknown Protein (AHRD V1)	plastid	2	-	none	plastid	6	N	51.9793
Solyc00g112930.2.1	Alpha-N-acetylglucosaminidase (AHRD V1 ***- Q9ZR45_TOBAC); contains Interpro domain(s) IPR007781 Alpha-N-acetylglucosaminidase	M	5	Y	possibly plastid	plastid	7	EX	80.9509
Solyc00g113740.1.1	Unknown Protein (AHRD V1)	M	4	Y	-	plastid	10	plastid	69.8265
Solyc00g120120.1.1	Unknown Protein (AHRD V1)	M	2	Y	possibly M	plastid	7	M	95.9766
Solyc00g121230.1.1	Cation/multidrug efflux system mebrane-fusion component (AHRD V1 *-*- Q0K5F0_RALEH)	M	2	-	plastid	plastid	7	M	88.4645
Solyc00g123030.1.1	Unknown Protein (AHRD V1)	plastid	4	Y	none	plastid	4	N	74.4731
Solyc00g125990.1.1	NADH-quinone oxidoreductase subunit N (AHRD V1 ***- B1LUM3_METRJ); contains Interpro domain(s) IPR001750 NADH:ubiquinone/plastoquinone oxidoreductase	-	2	-	none	not plastid	0	plastid	98.0412
Solyc00g126440.1.1	Unknown Protein (AHRD V1)	plastid	2	Y	plastid	plastid	13	plastid	99.2809
Solyc00g127540.1.1	Ribonucleoside-diphosphate reductase (AHRD V1 ***- Q46X33_RALEJ)	-	3	Y	none	plastid	5	C	99.1025
Solyc00g127670.1.1	Membrane protein (AHRD V1 ***- B6TDF9_MAIZE)	M	3	Y	ER	plastid	3	PM	97.7179
Solyc00g127870.2.1	Phosphatidylinositol N-acetylglucosaminyltransferase subunit P (AHRD V1 ***- B6TUG3_MAIZE); contains Interpro domain(s) IPR013717 PIG-P	M	4	-	possibly M	plastid	4	plastid	88.5502
Solyc00g128870.2.1	Nudix hydrolase 1 (AHRD V1 ***- A6ANR4_VIBHA); contains Interpro domain(s) IPR000086 NUDIX hydrolase domain	plastid	5	Y	none	plastid	4	P	42.4761
Solyc00g129680.1.1	Unknown Protein (AHRD V1)	M	5	Y	none	plastid	10	EX	39.9998
Solyc00g130190.1.1	Nicotinate phosphoribosyltransferase (AHRD V1 *-*- Q46YY6_RALEJ); contains Interpro domain(s) IPR007229 Nicotinate phosphoribosyltransferase-related	M	4	Y	possibly M	plastid	8	M	99.0967
Solyc00g133110.1.1	Peptidase M14 carboxypeptidase A (AHRD V1 *-*- B4SIH8_STRM5)	plastid	3	Y	none	plastid	12	plastid	80.1929
Solyc00g135040.1.1	Transcriptional regulator ArsR family (AHRD V1 *-*- D7I5V9_PSESS); contains Interpro domain(s) IPR001845 Bacterial regulatory protein, ArsR	plastid	5	Y	none	plastid	11	plastid	98.7191
Solyc00g136560.2.1	Undecaprenyl pyrophosphate synthase (AHRD V1 *-*- D8G636_9CYAN); contains Interpro domain(s) IPR001441 Di-trans-poly-cis-decaprenylcistransferase-like	plastid	4	Y	none	plastid	9	ER	77.0581
Solyc00g139760.1.1	Filamentous hemagglutinin family outer membrane protein (AHRD V1 **-- C6BQ18_RALP1); contains Interpro domain(s) IPR012334 Pectin lyase fold	M	5	-	none	plastid	2	plastid	54.0639
Solyc00g140060.2.1	Tripeptidyl peptidase II (AHRD V1 ***- Q5VZU9_HUMAN); contains Interpro domain(s) IPR015500 Peptidase S8, subtilisin-related	plastid	3	Y	possibly plastid	plastid	14	plastid	82.3919
Solyc00g142160.1.1	Unknown Protein (AHRD V1)	M	4	Y	possibly M	plastid	9	M	49.7954
Solyc00g142170.2.1	RNA-dependent RNA polymerase (AHRD V1 *-*- Q18L78_9VIRU); contains Interpro domain(s) IPR008686 RNA-dependent RNA polymerase, mitoviral	plastid	5	Y	possibly M	plastid	11	M	48.1298
Solyc00g147770.1.1	HAT family dimerisation domain containing protein (AHRD V1 ***- Q2QPA8_ORYSJ); contains Interpro domain(s) IPR008906 HAT dimerisation	-	2	-	plastid	plastid	8	V	23.1493
Solyc00g153980.1.1	Unknown Protein (AHRD V1)	plastid	5	-	-	not plastid	0	EX	76.1284
Solyc00g154480.1.1	Cellulose synthase-like protein E1 (AHRD V1 *-*- CSLE1_ARATH); contains Interpro domain(s) IPR005630 Terpene synthase, metal-binding domain	M	2	-	possibly plastid	plastid	8	G	51.7045
Solyc00g160780.2.1	Unknown Protein (AHRD V1)	plastid	4	-	none	plastid	8	plastid	58.8207
Solyc00g165080.1.1	Unknown Protein (AHRD V1)	-	4	Y	ER	plastid	6	PM	88.3712
Solyc00g171810.2.1	ATP synthase subunit a (AHRD V1 ***- Q45KQ5_CAPAN); contains Interpro domain(s) IPR000568 ATPase, F0 complex, subunit A	plastid	1	Y	possibly plastid	plastid	1	P	67.0412
Solyc00g178340.1.1	Branched-chain-amino-acid aminotransferase (AHRD V1 ***- Q94CF8_CAPAN); contains Interpro domain(s) IPR005786 Branched-chain amino acid aminotransferase II	-	5	-	none	plastid	7	plastid	99.9814
Solyc00g186050.1.1	Unknown Protein (AHRD V1)	M	5	Y	possibly ER	plastid	13	M	64.0872
Solyc00g187050.2.1	Leucyl aminopeptidase (AHRD V1 ***- D7DWG6_NOSA0); contains Interpro domain(s) IPR011356 Peptidase M17, leucyl aminopeptidase	plastid	2	Y	plastid	plastid	18	plastid	97.7911
Solyc00g203660.1.1	Ribulose bisphosphate carboxylase large chain (Fragment) (AHRD V1 ***- C9WX59_9GENT); contains Interpro domain(s) IPR000685 Ribulose bisphosphate carboxylase, large subunit, C-terminal	S	4	-	possibly M	not plastid	0	plastid	44.1052
Solyc00g210860.1.1	Unknown Protein (AHRD V1)	plastid	4	-	none	not plastid	0	C	88.6825
Solyc00g217560.1.1	Transcription factor CYCLOIDEA (Fragment) (AHRD V1 *-*- CYCLD_ANTML); contains Interpro domain(s) IPR005333 Transcription factor, Tplastid	plastid	2	Y	none	plastid	2	N	98.3935
Solyc00g222060.1.1	Unknown Protein (AHRD V1)	plastid	3	Y	none	plastid	2	N	95.1826
Solyc00g230070.1.1	Photosystem II plastid43 chlorophyll apoprotein (AHRD V1 ***- D1L8N4_BRANA); contains Interpro domain(s) IPR000932 Photosystem antenna protein-like	M	1	-	possibly M	plastid	3	plastid	87.7477
Solyc00g230280.1.1	Unknown Protein (AHRD V1)	plastid	5	-	none	plastid	4	plastid	40.274
Solyc00g231780.1.1	NAD(P)H-quinone oxidoreductase subunit I chloroplastic (AHRD V1 *-*- D3WFI2_TROAR); contains Interpro domain(s) IPR009051 Alpha-helical ferredoxin	-	5	-	plastid	plastid	3	M	99.8997
Solyc00g233480.1.1	ABC transporter-like protein (AHRD V1 *-*- Q6K376_ORYSJ)	M	5	-	none	plastid	2	plastid	62.0105
Solyc00g244300.1.1	Unknown Protein (AHRD V1)	plastid	1	Y	possibly plastid	plastid	11	N	79.1328
Solyc00g245200.1.1	Photosystem I P700 chlorophyll a apoprotein A1 (AHRD V1 ***- D3WDZ5_9ROSA); contains Interpro domain(s) IPR001280 Photosystem I psaA and psaB	S	3	-	none	plastid	8	plastid	87.2753
Solyc00g256710.1.1	Unknown Protein (AHRD V1)	plastid	2	Y	plastid	not plastid	0	C	59.7695
Solyc00g268310.1.1	Major facilitator superfamily transporter (AHRD V1 *--- A2W2R0_9BURK); contains Interpro domain(s) IPR016196 Major facilitator superfamily, general substrate transporter	M	2	-	possibly M	plastid	8	C	61.1651
Solyc00g272810.1.1	N-acetyltransferase (AHRD V1 ***- B6SUK9_MAIZE); contains Interpro domain(s) IPR000182 GCN5-related N-acetyltransferase	-	4	-	possibly plastid	plastid	8	C	74.6416
Solyc00g273110.1.1	Unknown Protein (AHRD V1)	S	5	-	possibly plastid	plastid	6	EX	99.8491
Solyc00g284510.1.1	Unknown Protein (AHRD V1)	-	4	-	possibly plastid	plastid	2	C	57.9452
Solyc00g306830.1.1	Glucose-methanol-choline oxidoreductase (AHRD V1 *--- C9S8I2_VERA1); contains Interpro domain(s) IPR000172 Glucose-methanol-choline oxidoreductase, N-terminal	-	3	Y	none	plastid	6	P	49.5423
Solyc00g320430.1.1	Unknown Protein (AHRD V1)	plastid	5	Y	-	not plastid	0	C	49.5188
Solyc00g322830.1.1	Unknown Protein (AHRD V1)	-	3	Y	plastid	plastid	9	PM	86.327
Solyc01g005060.2.1	Zinc finger protein (AHRD V1 *-*- Q764N7_MALDO); contains Interpro domain(s) IPR007087 Zinc finger, C2H2-type	plastid	5	-	none	not plastid	0	N	99.9983
Solyc01g005210.2.1	Alpha alpha-trehalose-phosphate synthase (UDP-forming) (AHRD V1 **** A3CXN9_METMJ); contains Interpro domain(s) IPR001830 Glycosyl transferase, family 20	plastid	4	-	none	plastid	3	C	99.9612
Solyc01g005240.2.1	Aspartokinase (AHRD V1 ***- B9RGY9_RICCO); contains Interpro domain(s) IPR001341 Aspartate kinase region	plastid	3	Y	plastid	plastid	14	plastid	99.527
Solyc01g005250.2.1	Aspartate-semialdehyde dehydrogenase (AHRD V1 ***- B6TWW1_MAIZE); contains Interpro domain(s) IPR005986 Aspartate-semialdehyde dehydrogenase, bacterial	plastid	3	Y	possibly M	plastid	14	plastid	99.9913
Solyc01g005380.2.1	SET domain containing protein (AHRD V1 ***- B6U0H4_MAIZE); contains Interpro domain(s) IPR001214 SET	S	5	-	possibly plastid	plastid	11	M	69.4178
Solyc01g005420.2.1	SRC2-like protein (AHRD V1 ***- A4K8J5_CAPAN); contains Interpro domain(s) IPR018029 C2 membrane targeting protein	-	3	-	possibly plastid	plastid	5	C	96.8409
Solyc01g005430.2.1	UBX domain protein 6 (AHRD V1 ***- Q7SXA8_DANRE); contains Interpro domain(s) IPR018997 PUB domain	plastid	4	Y	none	plastid	1	N	86.8878
Solyc01g005480.2.1	Unknown Protein (AHRD V1); contains Interpro domain(s) IPR007749 Protein of unknown function DUF677	plastid	5	-	possibly plastid	plastid	3	C	64.5959
Solyc01g005500.2.1	3-phenylpropionate-dihydrodiol/cinnamic acid-dihydrodiol dehydrogenase (AHRD V1 *-*- HCAB_SHIFL); contains Interpro domain(s) IPR002347 Glucose/ribitol dehydrogenase	-	3	-	none	plastid	2	plastid	99.5708
Solyc01g005520.2.1	Tetratricopeptide TPR_2 repeat protein (AHRD V1 *--- A8ZVN6_DESOH); contains Interpro domain(s) IPR001478 PDZ/DHR/GLGF	plastid	1	Y	plastid	plastid	11	C	86.4166
Solyc01g005540.2.1	Lysyl-tRNA synthetase (AHRD V1 ***- B9SBP3_RICCO); contains Interpro domain(s) IPR002313 Lysyl-tRNA synthetase, class II	plastid	3	Y	possibly plastid	plastid	13	M	98.3769
Solyc01g005660.1.1	Myb transcription factor (AHRD V1 **-- Q6Q789_VITVI); contains Interpro domain(s) IPR015495 Myb transcription factor	plastid	4	-	none	plastid	12	N	99.9999
Solyc01g005800.2.1	Calmodulin binding protein (AHRD V1 *--* B6U0B7_MAIZE)	plastid	5	-	none	not plastid	0	N	67.8677
Solyc01g005840.2.1	Ubiquitin-conjugating enzyme E2 E3 (AHRD V1 **** B6T544_MAIZE); contains Interpro domain(s) IPR000608 Ubiquitin-conjugating enzyme, E2	-	5	Y	none	plastid	7	plastid	99.4415
Solyc01g005910.2.1	Acid phosphatase/vanadium-dependent haloperoxidase related (AHRD V1 *--- B2A528_NATTJ); contains Interpro domain(s) IPR003832 Acid phosphatase/vanadium-dependent haloperoxidase related	-	5	Y	possibly plastid	plastid	13	plastid	99.1805
Solyc01g005930.2.1	Unknown Protein (AHRD V1)	plastid	4	-	plastid	plastid	5	G	51.53
Solyc01g005940.2.1	Phytoene synthase 3	plastid	2	-	plastid	plastid	9	plastid	99.0145
Solyc01g005960.2.1	ATP dependent RNA helicase (AHRD V1 ***- B3LKV6_YEAS1); contains Interpro domain(s) IPR011545 DNA/RNA helicase, DEAD/DEAH box type, N-terminal	plastid	4	-	none	not plastid	0	C	97.5581
Solyc01g005980.2.1	POT family domain containing protein expressed (AHRD V1 *-*- D8L9H8_WHEAT); contains Interpro domain(s) IPR007493 Protein of unknown function DUF538	-	4	-	possibly plastid	plastid	6	plastid	81.5586
Solyc01g006010.2.1	Branchpoint-bridging protein (AHRD V1 *--- C1FYD8_PARBD)	plastid	4	Y	none	plastid	5	N	97.6043
Solyc01g006020.2.1	At3g32930-like protein (Fragment) (AHRD V1 *-*- B3SKU7_ARAHA)	plastid	2	Y	plastid	plastid	11	plastid	63.1605
Solyc01g006040.2.1	E3 ubiquitin-protein ligase BRE1-like 2 (AHRD V1 ***- BRE1B_ARATH)	plastid	4	-	none	not plastid	0	N	99.1052
Solyc01g006130.2.1	Homology to unknown gene (AHRD V1 *-*- Q010T6_OSTTA); contains Interpro domain(s) IPR001305 Heat shock protein DnaJ, cysteine-rich region	plastid	1	Y	plastid	plastid	10	C	72.0697
Solyc01g006140.2.1	DNA replication factor Cdt1 (AHRD V1 *-*- CDT1_HUMAN); contains Interpro domain(s) IPR014939 DNA replication factor CDT1-like	plastid	4	-	none	plastid	2	N	85.1918
Solyc01g006160.2.1	Unknown Protein (AHRD V1)	S	2	Y	ER	plastid	10	PM	99.1202
Solyc01g006180.2.1	GTP-binding protein-like (AHRD V1 ***- Q69NK1_ORYSJ)	plastid	4	Y	possibly M	plastid	14	M	92.1849
Solyc01g006250.1.1	Unknown Protein (AHRD V1); contains Interpro domain(s) IPR001810 Cyclin-like F-box	plastid	5	-	none	plastid	3	C	95.0806
Solyc01g006300.2.1	Peroxidase (AHRD V1 **** Q43774_SOLLC); contains Interpro domain(s) IPR002016 Haem peroxidase, plant/fungal/bacterial	S	1	Y	ER	plastid	10	EX	95.4306
Solyc01g006310.2.1	Peroxidase (AHRD V1 ***- D7LZC8_ARALY); contains Interpro domain(s) IPR002016 Haem peroxidase, plant/fungal/bacterial	S	2	Y	ER	plastid	7	G	60.7052
Solyc01g006380.2.1	U-box domain-containing protein (AHRD V1 ***- B6V8G2_HELAN)	plastid	5	-	possibly plastid	not plastid	0	N	80.8611
Solyc01g006420.2.1	Unknown Protein (AHRD V1)	S	5	-	-	not plastid	0	plastid	44.8039
Solyc01g006430.2.1	Omega-6 fatty acid desaturase (AHRD V1 **** Q461Q1_HEVBR); contains Interpro domain(s) IPR005804 Fatty acid desaturase, type 1	-	2	-	none	plastid	1	plastid	99.9866
Solyc01g006450.2.1	Enoyl reductase (AHRD V1 ***- P93062_BRANA); contains Interpro domain(s) IPR014358 Enoyl-[acyl-carrier-protein] reductase (NADH)	plastid	1	Y	plastid	plastid	12	plastid	99.9999
Solyc01g006500.2.1	Pentatricopeptide repeat-containing protein (AHRD V1 ***- D7MMK8_ARALY); contains Interpro domain(s) IPR002885 Pentatricopeptide repeat	plastid	2	Y	plastid	not plastid	0	C	67.2243
Solyc01g006520.2.1	Receptor-like protein kinase (AHRD V1 ***- Q39202_ARATH); contains Interpro domain(s) IPR002290 Serine/threonine protein kinase	S	1	Y	ER	plastid	6	PM	99.134
Solyc01g006540.2.1	Lipoxygenase (AHRD V1 **** Q96573_SOLLC); contains Interpro domain(s) IPR001246 Lipoxygenase, plant	-	5	Y	none	plastid	12	C	99.9854
Solyc01g006560.2.1	Lipoxygenase (AHRD V1 **** C0KKU8_SOLLC); contains Interpro domain(s) IPR001246 Lipoxygenase, plant	plastid	5	Y	possibly M	plastid	11	C	99.9948
Solyc01g006700.2.1	Downstream neighbor of SON (AHRD V1 *-*- Q5U2V7_RAT)	plastid	4	Y	none	plastid	7	C	61.5035
Solyc01g006710.2.1	ATP-dependent RNA helicase A-like protein (AHRD V1 ***- Q9FF84_ARATH); contains Interpro domain(s) IPR011545 DNA/RNA helicase, DEAD/DEAH box type, N-terminal	M	2	Y	M	plastid	16	N	99.8965
Solyc01g006720.2.1	ABC transporter G family member 22 (AHRD V1 ***- AB22G_ARATH); contains Interpro domain(s) IPR013525 ABC-2 type transporter	plastid	3	Y	none	not plastid	0	plastid	79.85
Solyc01g006750.2.1	Unknown Protein (AHRD V1)	M	4	Y	plastid	plastid	9	EX	84.8069
Solyc01g006770.1.1	Glycoprotein-N-acetylgalactosamine 3-beta-galactosyltransferase 1 (AHRD V1 *--- C1GLT_HUMAN); contains Interpro domain(s) IPR006740 Protein of unknown function DUF604	-	5	Y	none	plastid	2	G	92.3177
Solyc01g006790.2.1	Unknown Protein (AHRD V1)	M	3	Y	possibly M	plastid	12	C	46.8217
Solyc01g006820.2.1	Unknown Protein (AHRD V1)	M	4	Y	-	not plastid	0	C	54.7936
Solyc01g006850.1.1	Pentatricopeptide repeat-containing protein (AHRD V1 ***- D7LZQ2_ARALY); contains Interpro domain(s) IPR002885 Pentatricopeptide repeat	plastid	5	Y	possibly M	plastid	3	C	96.6221
Solyc01g006910.2.1	Ring finger protein (AHRD V1 *-*- O49869_HORVU); contains Interpro domain(s) IPR018957 Zinc finger, C3HC4 RING-type	-	3	Y	none	plastid	4	PM	73.1003
Solyc01g006940.2.1	Poly(U)-binding-splicing factor PUF60 (AHRD V1 *--* PUF60_BOVIN); contains Interpro domain(s) IPR003954 RNA recognition, region 1	plastid	1	Y	plastid	plastid	5	plastid	99.948
Solyc01g006970.2.1	ATP-dependent RNA helicase A-like protein (AHRD V1 ***- Q9FF84_ARATH); contains Interpro domain(s) IPR007502 Helicase-associated region	M	3	Y	plastid	plastid	14	N	99.8624
Solyc01g006980.2.1	Malonyl CoA-acyl carrier protein transacylase containing protein expressed (AHRD V1 ***- Q10MS3_ORYSJ); contains Interpro domain(s) IPR004410 Malonyl CoA-acyl carrier protein transacylase	plastid	2	Y	plastid	plastid	10	plastid	90.5426
Solyc01g007100.2.1	Digalactosyldiacylglycerol synthase 1, chloroplastic (AHRD V1 ***- DGDG1_LOTJA); contains Interpro domain(s) IPR001296 Glycosyl transferase, group 1	plastid	4	Y	none	plastid	3	C	60.2844
Solyc01g007160.2.1	N-acetyltransferase ESCO1 (AHRD V1 **-- B6TTW6_MAIZE); contains Interpro domain(s) IPR001126 DNA-repair protein, UmuC-like	plastid	3	-	none	plastid	2	N	82.0914
Solyc01g007260.2.1	Os04g0416500 protein (Fragment) (AHRD V1 ***- Q0JDA8_ORYSJ); contains Interpro domain(s) IPR004176 Clp, N-terminal	-	5	Y	none	plastid	11	N	89.1354
Solyc01g007300.1.1	NAD(P)H-quinone oxidoreductase subunit K chloroplastic (AHRD V1 ***- D3WB90_9BORA); contains Interpro domain(s) IPR006138 NADH:ubiquinone oxidoreductase, 20 kDa subunit	-	5	Y	none	plastid	8	M	54.9776
Solyc01g007420.2.1	Cytochrome b6-f complex subunit 6 (AHRD V1 *-*- Q5K3U2_9MAGN); contains Interpro domain(s) IPR007802 Cytochrome b6/f complex subunit VI	S	2	Y	none	plastid	6	V	48.5898
Solyc01g007480.1.1	Ribosomal protein S12 (Fragment) (AHRD V1 *-*- B0LN88_LYCCH)	S	2	-	possibly plastid	not plastid	0	EX	80.1256
Solyc01g007700.2.1	Conserved protein (AHRD V1 *-*- C7TFZ2_LACRL)	plastid	3	Y	possibly plastid	plastid	5	plastid	99.4671
Solyc01g007730.2.1	ORF91 (AHRD V1 *--- C1BRN8_9MAXI)	plastid	5	-	possibly plastid	plastid	2	C	79.806
Solyc01g007740.2.1	Peroxiredoxin (AHRD V1 **-- Q9FE12_PHAVU); contains Interpro domain(s) IPR000866 Alkyl hydroperoxide reductase/ Thiol specific antioxidant/ Mal allergen	plastid	1	Y	plastid	plastid	12	plastid	99.9408
Solyc01g007750.2.1	Mitochondrial transcription termination factor (Fragment) (AHRD V1 *--- C6FB10_PSEMZ); contains Interpro domain(s) IPR003690 Mitochodrial transcription termination factor-related	plastid	2	Y	possibly plastid	plastid	5	plastid	75.5523
Solyc01g007760.2.1	Transcription factor E2F (AHRD V1 **** Q9LEL4_DAUCA); contains Interpro domain(s) IPR015633 E2F Family	plastid	2	Y	none	plastid	9	N	99.5432
Solyc01g007770.2.1	Genomic DNA chromosome 5 P1 clone MHF15 (AHRD V1 ***- Q9FNI0_ARATH)	plastid	3	Y	possibly plastid	plastid	3	C	49.0959
Solyc01g007800.2.1	Plant-specific domain TIGR01568 family protein (AHRD V1 *--- B6SZV1_MAIZE); contains Interpro domain(s) IPR006458 Protein of unknown function DUF623, plant	plastid	4	Y	possibly M	plastid	4	M	94.0488
Solyc01g007810.1.1	Plant-specific domain TIGR01568 family protein (AHRD V1 *--- B6U9N9_MAIZE); contains Interpro domain(s) IPR006458 Protein of unknown function DUF623, plant	plastid	2	Y	none	plastid	10	N	67.6159
Solyc01g007840.2.1	CCR4-NOT transcription complex subunit 7 (AHRD V1 ***- B4FG48_MAIZE); contains Interpro domain(s) IPR006941 Ribonuclease CAF1	plastid	3	Y	plastid	plastid	6	plastid	84.4648
Solyc01g007850.2.1	Pentatricopeptide repeat-containing protein (AHRD V1 ***- D7MHD4_ARALY); contains Interpro domain(s) IPR002885 Pentatricopeptide repeat	M	5	-	possibly plastid	plastid	4	C	99.2865
Solyc01g007880.2.1	MORN repeat protein (AHRD V1 *--- D4V7H0_BACVU); contains Interpro domain(s) IPR019746 Tubulin/FtsZ, N-terminal	plastid	2	Y	plastid	plastid	19	PM	26.4338
Solyc01g007890.1.1	Unknown Protein (AHRD V1)	plastid	5	Y	none	plastid	1	N	76.7096
Solyc01g007910.2.1	Succinyl-CoA ligase (AHRD V1 ***- B9RL91_RICCO); contains Interpro domain(s) IPR005810 Succinyl-CoA ligase, alpha subunit	M	4	Y	M	plastid	17	M	99.9989
Solyc01g007930.2.1	Sel1 domain protein repeat-containing protein (AHRD V1 *-*- A5GBQ0_GEOUR); contains Interpro domain(s) IPR011990 Tetratricopeptide-like helical	M	5	Y	none	plastid	6	C	93.5729
Solyc01g008070.2.1	Alpha/beta superfamily hydrolase (AHRD V1 *--- D0CIF5_9SYNE); contains Interpro domain(s) IPR010765 Protein of unknown function DUF1350	plastid	4	Y	none	plastid	6	plastid	99.5697
Solyc01g008120.2.1	Histone acetyltransferase (AHRD V1 **** B9HG17_POPTR); contains Interpro domain(s) IPR009255 Transcriptional coactivation	plastid	3	Y	none	not plastid	0	N	99.9898
Solyc01g008160.2.1	Tetratricopeptide repeat-containing protein (AHRD V1 ***- D7L8H9_ARALY); contains Interpro domain(s) IPR011990 Tetratricopeptide-like helical	plastid	2	Y	plastid	plastid	11	plastid	98.4025
Solyc01g008170.2.1	Zinc finger CCCH domain-containing protein 17 (AHRD V1 ***- C3H17_ARATH); contains Interpro domain(s) IPR000571 Zinc finger, CCCH-type	plastid	5	-	none	not plastid	0	N	98.4657
Solyc01g008190.2.1	Os05g0304100 protein (Fragment) (AHRD V1 *-*- Q0DJB8_ORYSJ)	plastid	2	Y	plastid	plastid	12	plastid	60.4034
Solyc01g008200.2.1	Os05g0304100 protein (Fragment) (AHRD V1 ***- Q0DJB8_ORYSJ)	plastid	5	-	none	plastid	5	C	89.5896
Solyc01g008250.2.1	Thioredoxin X (AHRD V1 ***- B6T9S0_MAIZE); contains Interpro domain(s) IPR015467 Thioredoxin, core	plastid	1	Y	plastid	plastid	12	plastid	99.8693
Solyc01g008330.2.1	Acetyl-CoA carboxylase biotin carboxylase (AHRD V1 ***- B4VQU4_9CYAN); contains Interpro domain(s) IPR004549 Acetyl-CoA carboxylase, biotin carboxylase	plastid	2	Y	none	plastid	6	plastid	52.2494
Solyc01g008340.2.1	50S ribosomal protein L19 (AHRD V1 *-*- B6T8M1_MAIZE); contains Interpro domain(s) IPR001857 Ribosomal protein L19	M	3	Y	M	plastid	14	M	99.1227
Solyc01g008470.2.1	Non-selective cation channel-2 family (AHRD V1 **-- C1N231_MIplastidS); contains Interpro domain(s) IPR004728 Translocation protein Sec62	plastid	4	-	none	plastid	1	N	57.1114
Solyc01g008480.2.1	Pentatricopeptide repeat-containing protein (AHRD V1 ***- D7MTZ6_ARALY); contains Interpro domain(s) IPR002885 Pentatricopeptide repeat	M	5	Y	possibly M	plastid	8	M	85.0197
Solyc01g008490.2.1	Nuclear transcription factor Y subunit A-1 (AHRD V1 *-** B6TAR1_MAIZE); contains Interpro domain(s) IPR001289 CCAAT-binding transcription factor, subunit B	plastid	5	-	none	not plastid	0	N	99.9157
Solyc01g008510.2.1	Photosystem II 5 kDa protein, chloroplastic (AHRD V1 *-*- PST2_GOSHI)	plastid	2	-	plastid	not plastid	0	plastid	80.876
Solyc01g008520.2.1	DNA repair protein XRCC2 (AHRD V1 ***- XRCC2_HUMAN)	plastid	5	-	none	plastid	3	C	69.4887
Solyc01g008560.2.1	NAD kinase 1 (AHRD V1 **** B6SWV6_MAIZE); contains Interpro domain(s) IPR002504 ATP-NAD/AcoX kinase	plastid	5	-	none	not plastid	0	C	59.6435
Solyc01g008650.2.1	Cytochrome P450	S	2	Y	ER	plastid	12	G	86.7453
Solyc01g008670.2.1	Cytochrome P450	S	3	Y	ER	plastid	8	ER	56.2714
Solyc01g008700.2.1	cDNA clone 001-102-C05 full insert sequence (AHRD V1 **-- B7E7M9_ORYSJ)	plastid	2	Y	plastid	plastid	12	plastid	66.0933
Solyc01g008740.1.1	Calcium-dependent protein kinase 17 (AHRD V1 **** Q6KC53_NIplastidL); contains Interpro domain(s) IPR002290 Serine/threonine protein kinase	plastid	4	-	none	not plastid	0	C	96.9498
Solyc01g008770.2.1	Rho GTPase activating protein 12 (AHRD V1 *--* Q6P4P5_DANRE); contains Interpro domain(s) IPR000198 RhoGAP	plastid	2	Y	plastid	plastid	10	C	83.4082
Solyc01g008780.2.1	Phospholipase A22 (AHRD V1 ***- B9SJ74_RICCO); contains Interpro domain(s) IPR016090 Phospholipase A2	-	2	Y	none	plastid	2	P	53.7624
Solyc01g008790.2.1	Phosphoesterase family protein (AHRD V1 ***- D7LEV5_ARALY); contains Interpro domain(s) IPR007312 Phosphoesterase	S	3	Y	ER	not plastid	0	plastid	70.6306
Solyc01g008800.1.1	Tir-nbs-lrr, resistance protein	plastid	5	Y	none	plastid	6	C	92.4406
Solyc01g008820.2.1	Signal peptide peptidase family protein (AHRD V1 ***- D7LQE4_ARALY); contains Interpro domain(s) IPR007369 Peptidase A22B, signal peptide peptidase	S	3	Y	ER	plastid	2	PM	98.2743
Solyc01g008860.1.1	ATP binding / serine-threonine kinase (AHRD V1 **** C5DB71_VITVI); contains Interpro domain(s) IPR002290 Serine/threonine protein kinase	plastid	2	Y	plastid	plastid	1	plastid	85.7229
Solyc01g008870.1.1	ATP binding / serine-threonine kinase (AHRD V1 **** C5DB71_VITVI); contains Interpro domain(s) IPR002290 Serine/threonine protein kinase	plastid	1	Y	possibly plastid	plastid	12	plastid	99.863
Solyc01g008920.2.1	NAD dependent epimerase/dehydratase family protein expressed (AHRD V1 **-- Q10L97_ORYSJ); contains Interpro domain(s) IPR013120 Male sterility, NAD-binding	plastid	1	Y	plastid	plastid	12	plastid	99.9864
Solyc01g008930.2.1	Phycoerythrobilin ferredoxin oxidoreductase (AHRD V1 **** Q6E5A3_MAIZE); contains Interpro domain(s) IPR009249 Ferredoxin-dependent bilin reductase	plastid	3	Y	plastid	plastid	14	plastid	99.8992
Solyc01g008940.2.1	Anther protein (AHRD V1 ***- Q8RX90_TOBAC)	S	1	Y	ER	not plastid	0	EX	99.5919
Solyc01g009010.2.1	4-diphosphocytidyl-2-C-methyl-D-erythritol kinase (AHRD V1 ***- A4USB3_NICBE); contains Interpro domain(s) IPR004424 4-diphosphocytidyl-2C-methyl-D-erythritol kinase	plastid	2	Y	possibly plastid	plastid	21	plastid	99.9599
Solyc01g009030.2.1	Nuclear control of ATPase protein (AHRD V1 *--- C9SK53_VERA1); contains Interpro domain(s) IPR013946 Nuclear control of ATP synthase 2	plastid	5	Y	none	not plastid	0	plastid	82.6236
Solyc01g009060.2.1	BTB/POZ domain containing protein expressed (AHRD V1 ***- Q10C73_ORYSJ); contains Interpro domain(s) IPR013089 Kelch related	plastid	5	-	none	plastid	2	C	99.1868
Solyc01g009080.2.1	FHA domain containing protein (AHRD V1 ***- B6TP39_MAIZE); contains Interpro domain(s) IPR000253 Forkhead-associated	plastid	3	Y	none	plastid	11	plastid	99.8147
Solyc01g009090.2.1	Serrate RNA effector molecule homolog (AHRD V1 *-*- SRRT_DROWI)	plastid	5	-	none	not plastid	0	N	99.4394
Solyc01g009110.2.1	Histone deacetylase family protein expressed (AHRD V1 ***- Q2QWU2_ORYSJ); contains Interpro domain(s) IPR000286 Histone deacetylase superfamily	plastid	5	-	none	plastid	2	N	58.2502
Solyc01g009120.2.1	Histone deacetylase family protein expressed (AHRD V1 ***- Q2QWU2_ORYSJ); contains Interpro domain(s) IPR000286 Histone deacetylase superfamily	plastid	4	Y	none	plastid	12	plastid	99.5617
Solyc01g009160.2.1	Harpin-induced protein-like (Fragment) (AHRD V1 **-- D2CFH8_COFAR); contains Interpro domain(s) IPR010847 Harpin-induced 1	plastid	2	Y	none	not plastid	0	N	43.9212
Solyc01g009180.2.1	5-methyltetrahydropteroyltriglutamate--homocysteine methyltransferase (AHRD V1 ***- B6UF55_MAIZE); contains Interpro domain(s) IPR006276 5-methyltetrahydropteroyltriglutamate--homocysteine S-methyltransferase	plastid	3	Y	M	plastid	8	plastid	83.1926
Solyc01g009210.1.1	Unknown Protein (AHRD V1)	S	2	Y	ER	plastid	3	EX	97.4754
Solyc01g009250.2.1	Unknown Protein (AHRD V1)	M	5	Y	none	plastid	10	M	87.2141
Solyc01g009260.1.1	60S ribosomal protein L5, mitochondrial (AHRD V1 *-*- RM05_SOLTU)	plastid	4	Y	possibly plastid	plastid	7	M	94.7312
Solyc01g009270.1.1	Unknown Protein (AHRD V1)	plastid	4	Y	none	plastid	2	N	69.4551
Solyc01g009290.2.1	Polyribonucleotide 5&apos;-hydroxyl-kinase Clp1 (AHRD V1 **** CLP1_CHICK); contains Interpro domain(s) IPR010655 Pre-mRNA cleavage complex II Clp1	-	5	-	none	plastid	11	plastid	35.9797
Solyc01g009490.1.1	cDNA clone J100026I16 full insert sequence (AHRD V1 **-- B7FA06_ORYSJ)	M	4	-	possibly plastid	plastid	8	plastid	46.8618
Solyc01g009550.1.1	Hypothetical chloroplast RF1 (AHRD V1 ***- C3UP30_9MAGN)	-	5	-	M	plastid	8	plastid	56.9787
Solyc01g009580.1.1	Terminal flower 1 (Fragment) (AHRD V1 **-- B3VT07_9ROSA); contains Interpro domain(s) IPR008914 Phosphatidylethanolamine-binding protein PEBP	-	5	-	none	plastid	10	plastid	87.6312
Solyc01g009590.2.1	A9-like protein (Fragment) (AHRD V1 **-- A4L798_SINAL); contains Interpro domain(s) IPR003612 Plant lipid transfer protein/seed storage/trypsin-alpha amylase inhibitor	S	3	Y	ER	plastid	4	EX	68.1678
Solyc01g009600.2.1	Dehydration-responsive family protein (AHRD V1 **-- D7M5L0_ARALY); contains Interpro domain(s) IPR004159 Protein of unknown function DUF248, methyltransferase putative	-	5	Y	none	plastid	15	plastid	87.0019
Solyc01g009620.2.1	Cleavage and polyadenylation specificity factor subunit 5 (AHRD V1 ***- C1BVK1_9MAXI); contains Interpro domain(s) IPR016706 Cleavage and polyadenylation specificity factor, 25 kDa subunit	-	3	-	plastid	plastid	10	plastid	73.9818
Solyc01g009630.2.1	Cleavage and polyadenylation specificity factor subunit 5 (AHRD V1 ***- C1BVK1_9MAXI); contains Interpro domain(s) IPR016706 Cleavage and polyadenylation specificity factor, 25 kDa subunit	-	2	-	plastid	plastid	5	C	79.1281
Solyc01g009670.2.1	CCA-adding enzyme (AHRD V1 *-*- CCA_STAES); contains Interpro domain(s) IPR002646 Polynucleotide adenylyltransferase region	M	5	-	possibly M	plastid	17	M	99.224
Solyc01g009730.1.1	Unknow protein (AHRD V1 *-*- Q5W7C9_ORYSJ); contains Interpro domain(s) IPR010399 Tify	plastid	5	Y	none	not plastid	0	C	72.9612
Solyc01g009770.2.1	Major ampullate spidroin 2-2 (AHRD V1 *-*- B6TJV0_MAIZE); contains Interpro domain(s) IPR001202 WW/Rsp5/WWP	plastid	2	Y	none	not plastid	0	N	99.7746
Solyc01g009890.1.1	Glutaredoxin (AHRD V1 ***- B9GZC7_POPTR); contains Interpro domain(s) IPR011905 Glutaredoxin-like, plant II	plastid	5	Y	none	plastid	3	C	99.6129
Solyc01g009900.2.1	Glutaredoxin (AHRD V1 ***- B9GF65_POPTR); contains Interpro domain(s) IPR011905 Glutaredoxin-like, plant II	M	3	Y	none	plastid	7	C	99.5332
Solyc01g009910.1.1	Glutaredoxin (AHRD V1 ***- B9GF65_POPTR); contains Interpro domain(s) IPR011905 Glutaredoxin-like, plant II	M	2	Y	none	plastid	8	C	99.8864
Solyc01g009960.2.1	Stearoyl-acyl-carrier protein desaturase (AHRD V1 **** C0KWD3_RICCO); contains Interpro domain(s) IPR005067 Fatty acid desaturase, type 2	plastid	4	-	none	plastid	2	plastid	99.9966
Solyc01g009970.2.1	Amidohydrolase 2 (AHRD V1 ***- Q01SB2_SOLUE); contains Interpro domain(s) IPR006992 Amidohydrolase 2	plastid	5	Y	possibly plastid	plastid	14	PM	40.8164
Solyc01g009990.2.1	Peptidyl-prolyl cis-trans isomerase (AHRD V1 ***- B9RMA5_RICCO); contains Interpro domain(s) IPR002130 Peptidyl-prolyl cis-trans isomerase, cyclophilin-type	plastid	1	Y	plastid	plastid	14	plastid	99.8692
Solyc01g010030.2.1	Receptor-like protein kinase At3g21340 (AHRD V1 *-*- RLK6_ARATH); contains Interpro domain(s) IPR002290 Serine/threonine protein kinase	plastid	3	Y	plastid	plastid	13	plastid	97.1001
Solyc01g010080.2.1	Potassium/sodium hyperpolarization-activated cyclic nucleotide-gated channel 4 (AHRD V1 **** HCN4_MOUSE); contains Interpro domain(s) IPR000595 Cyclic nucleotide-binding	plastid	2	Y	none	plastid	1	C	56.0518
Solyc01g010130.2.1	Transcription factor (AHRD V1 *-** D6MKM4_9ASPA); contains Interpro domain(s) IPR011598 Helix-loop-helix DNA-binding	-	3	Y	none	not plastid	0	N	99.9908
Solyc01g010280.2.1	Unknown Protein (AHRD V1)	plastid	5	Y	none	not plastid	0	N	94.3253
Solyc01g010350.2.1	Glucose-6-phosphate/phosphate translocator (AHRD V1 **** Q7XY15_WHEAT); contains Interpro domain(s) IPR004696 Tpt phosphate/phosphoenolpyruvate translocator	plastid	1	Y	plastid	plastid	11	plastid	99.9968
Solyc01g010390.2.1	Beta-glucosidase (AHRD V1 ***- D3YJ59_VITVI); contains Interpro domain(s) IPR001360 Glycoside hydrolase, family 1	S	1	Y	ER	plastid	5	ER	99.9209
Solyc01g010440.2.1	Unknown Protein (AHRD V1)	plastid	5	-	none	not plastid	0	N	96.9777
Solyc01g010460.2.1	Unknown Protein (AHRD V1)	plastid	2	Y	possibly plastid	plastid	21	G	27.246
Solyc01g010470.2.1	Isoamylase N-terminal domain containing protein (AHRD V1 ***- Q6AVV5_ORYSJ)	plastid	3	-	none	plastid	7	plastid	46.5703
Solyc01g010520.2.1	Uncharacterized plant-specific domain TIGR01589 family protein (AHRD V1 ***- Q60CZ4_SOLDE); contains Interpro domain(s) IPR006476 Conserved hypothetical protein CHP01589, plant	plastid	5	-	none	plastid	1	N	99.2271
Solyc01g010640.2.1	Uncharacterized membrane protein (AHRD V1 **-- Q46JN3_PROMT); contains Interpro domain(s) IPR001395 Aldo/keto reductase	plastid	2	Y	plastid	plastid	14	plastid	87.9446
Solyc01g010660.2.1	Receptor-like protein kinase At3g21340 (AHRD V1 **** RLK6_ARATH); contains Interpro domain(s) IPR002290 Serine/threonine protein kinase	plastid	1	Y	plastid	plastid	18	plastid	99.942
Solyc01g010830.2.1	HAD-superfamily hydrolase (AHRD V1 ***- D5A3P4_SPIPL); contains Interpro domain(s) IPR011949 HAD-superfamily hydrolase, subfamily IA, REG-2-like	M	3	Y	possibly M	plastid	15	plastid	50.3779
Solyc01g010950.2.1	Kinase family protein (AHRD V1 **** D7KBF8_ARALY); contains Interpro domain(s) IPR016253 Integrin-linked protein kinase	plastid	5	-	none	not plastid	0	C	96.1548
Solyc01g010980.1.1	Unknown Protein (AHRD V1)	plastid	5	-	-	not plastid	0	N	93.7603
Solyc01g011080.2.1	Unknown Protein (AHRD V1)	plastid	5	Y	-	plastid	5	C	81.0025
Solyc01g011090.2.1	Phospholipid-transporting ATPase (AHRD V1 ***- C5G6U4_AJEDR); contains Interpro domain(s) IPR001757 ATPase, P-type, K/Mg/Cd/Cu/Zn/Na/Ca/Na/H-transporter	plastid	5	Y	possibly plastid	plastid	10	plastid	88.7641
Solyc01g011200.2.1	Aspartyl protease family protein (AHRD V1 ***- D7LJ61_ARALY); contains Interpro domain(s) IPR001461 Peptidase A1	-	4	Y	possibly plastid	plastid	3	plastid	58.8105
Solyc01g011290.1.1	HAT family dimerisation domain containing protein (AHRD V1 **-- Q2R0X2_ORYSJ)	M	5	-	plastid	plastid	5	M	63.3733
Solyc01g011300.1.1	Aspartyl protease family protein (AHRD V1 -**- D7LJ61_ARALY); contains Interpro domain(s) IPR001461 Peptidase A1	-	3	-	none	plastid	3	plastid	41.3883
Solyc01g011310.1.1	Aspartyl protease family protein (AHRD V1 **-- D7LJ61_ARALY); contains Interpro domain(s) IPR001461 Peptidase A1	-	5	-	none	not plastid	0	plastid	84.4557
Solyc01g011330.1.1	Aspartyl protease family protein (AHRD V1 **-- D7M1J9_ARALY); contains Interpro domain(s) IPR001461 Peptidase A1	-	4	-	possibly plastid	plastid	10	plastid	77.8655
Solyc01g011350.2.1	cDNA clone J013057D02 full insert sequence (AHRD V1 **-- B7EBX1_ORYSJ)	plastid	2	Y	none	plastid	5	N	96.6029
Solyc01g011390.2.1	Unknown Protein (AHRD V1)	plastid	2	Y	none	not plastid	0	N	99.1448
Solyc01g011480.1.1	Photosystem II plastid43 chlorophyll apoprotein (AHRD V1 ***- B7T461_9ROSI); contains Interpro domain(s) IPR000932 Photosystem antenna protein-like	-	3	-	none	plastid	4	plastid	71.3349
Solyc01g012600.1.1	Dicer-like protein (AHRD V1 *-*- B9HYI3_POPTR)	-	4	-	none	not plastid	0	plastid	99.5562
Solyc01g012730.1.1	Dicel-like 2 (Fragment) (AHRD V1 *-*- B8ZYR7_NICBE)	M	4	-	possibly plastid	plastid	14	EX	80.435
Solyc01g013770.1.1	Unknown Protein (AHRD V1)	M	5	-	possibly plastid	plastid	10	EX	99.633
Solyc01g013940.1.1	Dicel-like 2 (Fragment) (AHRD V1 ***- B8ZYR7_NICBE)	plastid	4	-	none	plastid	10	plastid	95.0424
Solyc01g013960.1.1	LRR receptor-like serine/threonine-protein kinase, RLP	-	4	-	possibly plastid	not plastid	0	C	61.042
Solyc01g014210.1.1	ADP ATP carrier protein-like (AHRD V1 **** Q2XTC3_SOLTU); contains Interpro domain(s) IPR002113 Adenine nucleotide translocator 1	-	5	Y	none	plastid	13	M	69.757
Solyc01g014270.2.1	Unknown Protein (AHRD V1)	S	2	Y	ER	plastid	6	EX	93.7427
Solyc01g014400.1.1	Dicer-like protein (AHRD V1 ***- B9HHX6_POPTR)	-	4	-	possibly plastid	plastid	2	C	34.8555
Solyc01g014510.1.1	S-locus-specific glycoprotein S14 (Fragment) (AHRD V1 *--- SLSG4_BRAOL); contains Interpro domain(s) IPR001480 Curculin-like (mannose-binding) lectin	S	1	Y	ER	not plastid	0	PM	93.6227
Solyc01g014580.1.1	Unknown Protein (AHRD V1)	plastid	5	Y	none	plastid	1	N	99.6191
Solyc01g014620.1.1	Unknown Protein (AHRD V1)	plastid	3	Y	none	plastid	1	plastid	80.3019
Solyc01g014630.1.1	Unknown Protein (AHRD V1)	S	3	-	possibly plastid	plastid	1	EX	66.8206
Solyc01g014760.1.1	Unknown Protein (AHRD V1)	plastid	3	Y	possibly plastid	plastid	7	N	42.7391
Solyc01g014850.2.1	Zinc finger CCCH domain-containing protein 14 (AHRD V1 ***- C3H14_ORYSJ); contains Interpro domain(s) IPR018111 K Homology, type 1, subgroup	-	5	Y	none	plastid	4	plastid	66.7614
Solyc01g014940.1.1	LRR receptor-like serine/threonine-protein kinase, RLP	-	5	-	none	plastid	7	plastid	34.1552
Solyc01g014990.1.1	Unknown Protein (AHRD V1)	plastid	1	Y	plastid	plastid	4	V	98.1224
Solyc01g015000.2.1	Nitrogen regulatory protein P-II (AHRD V1 *-*- Q8DLA5_THEEB); contains Interpro domain(s) IPR002187 Nitrogen regulatory protein PII	plastid	2	Y	plastid	plastid	7	plastid	87.2985
Solyc01g015210.1.1	B3 domain-containing protein At1g49475 (AHRD V1 *-*- Y1475_ARATH); contains Interpro domain(s) IPR003340 Transcriptional factor B3	plastid	5	-	none	plastid	6	N	98.2401
Solyc01g015240.1.1	Unknown Protein (AHRD V1)	plastid	2	Y	possibly plastid	plastid	5	N	70.4886
Solyc01g016350.1.1	Unknown Protein (AHRD V1)	S	4	-	none	plastid	4	plastid	49.2493
Solyc01g016390.2.1	Os06g0207500 protein (Fragment) (AHRD V1 *-*- Q0DDQ9_ORYSJ)	plastid	3	Y	none	not plastid	0	N	36.393
Solyc01g016430.1.1	Unknown Protein (AHRD V1)	plastid	3	Y	possibly ER	plastid	20	EX	91.409
Solyc01g016450.1.1	Unknown Protein (AHRD V1)	plastid	5	-	possibly plastid	plastid	4	plastid	87.5052
Solyc01g016480.1.1	Ulp1 protease family C-terminal catalytic domain containing protein (AHRD V1 *-*- Q60D46_SOLDE)	plastid	5	-	none	not plastid	0	N	69.1319
Solyc01g016510.1.1	AT4g03420/F9H3_4 (AHRD V1 ***- Q8S9K9_ARATH); contains Interpro domain(s) IPR008507 Protein of unknown function DUF789	plastid	5	Y	possibly plastid	plastid	13	N	61.2465
Solyc01g016650.1.1	Unknown Protein (AHRD V1)	plastid	5	Y	ER	plastid	3	EX	97.6369
Solyc01g016690.1.1	Unknown Protein (AHRD V1)	plastid	4	Y	ER	plastid	2	V	68.1656
Solyc01g016780.1.1	Unknown Protein (AHRD V1)	M	5	Y	none	plastid	8	EX	99.2208
Solyc01g016880.1.1	Unknown Protein (AHRD V1)	plastid	2	Y	possibly plastid	plastid	14	N	81.1359
Solyc01g016890.1.1	Unknown Protein (AHRD V1)	M	5	-	possibly plastid	plastid	2	C	90.6732
Solyc01g016940.1.1	Unknown Protein (AHRD V1)	M	4	-	plastid	plastid	7	M	96.9212
Solyc01g016980.1.1	Unknown Protein (AHRD V1)	-	5	Y	plastid	plastid	14	C	74.731
Solyc01g017070.1.1	Ycf2 (AHRD V1 *-*- A6Y9W3_9MAGN); contains Interpro domain(s) IPR008543 Chloroplast Ycf2	M	4	-	possibly plastid	plastid	3	C	80.1033
Solyc01g017250.1.1	Ycf1 (AHRD V1 *--- D2KLR1_OLEEU); contains Interpro domain(s) IPR008896 Ycf1	plastid	3	Y	possibly plastid	plastid	2	C	88.7275
Solyc01g017300.1.1	Photosystem I P700 chlorophyll a apoprotein A1 (AHRD V1 *-*- D4PBB1_PHODC); contains Interpro domain(s) IPR001280 Photosystem I psaA and psaB	S	5	-	possibly plastid	plastid	10	plastid	99.9974
Solyc01g017320.1.1	Photosystem I P700 chlorophyll a apoprotein A1 (AHRD V1 ***- D3WBY3_9MAGN); contains Interpro domain(s) IPR001280 Photosystem I psaA and psaB	-	3	-	possibly M	not plastid	0	plastid	99.608
Solyc01g017350.1.1	DNA-directed RNA polymerase subunit beta&apos&apos (AHRD V1 ***- A9XW65_CORFO)	-	3	-	none	plastid	4	plastid	91.2339
Solyc01g017430.1.1	Cytochrome b6-f complex subunit 4 (AHRD V1 ***- D5FHB7_PHODC); contains Interpro domain(s) IPR005870 Cytochrome b6/f complex, subunit IV	-	3	-	none	not plastid	0	plastid	97.6235
Solyc01g017760.1.1	Unknown Protein (AHRD V1)	-	5	-	ER	plastid	8	plastid	91.9781
Solyc01g018000.1.1	Unknown Protein (AHRD V1)	S	3	Y	ER	plastid	3	PM	99.9898
Solyc01g018020.1.1	Transketolase-like protein (AHRD V1 ***- Q8LE99_ARATH); contains Interpro domain(s) IPR005478 Bacterial transketolase	-	4	-	none	plastid	11	plastid	92.257
Solyc01g018050.1.1	Unknown Protein (AHRD V1)	M	5	Y	possibly plastid	plastid	3	C	71.6287
Solyc01g018090.1.1	Photosystem I P700 chlorophyll a apoprotein A1 (AHRD V1 *-*- B0Z4L7_OENAR); contains Interpro domain(s) IPR001280 Photosystem I psaA and psaB	M	3	-	none	not plastid	0	plastid	46.1616
Solyc01g019100.1.1	Unknown Protein (AHRD V1)	-	2	-	none	plastid	6	V	54.4954
Solyc01g020130.2.1	Glycosyltransferase (AHRD V1 ***- Q50HV0_SOLLC); contains Interpro domain(s) IPR005027 Glycosyl transferase, family 43	M	5	Y	possibly M	plastid	7	PM	98.8093
Solyc01g020190.2.1	Membrane-associated ring finger 6 (AHRD V1 *--- B3VKM1_PIG); contains Interpro domain(s) IPR011016 Zinc finger, RING-CH-type	plastid	3	Y	none	plastid	7	C	97.1609
Solyc01g020530.1.1	Unknown Protein (AHRD V1)	M	4	Y	possibly plastid	plastid	8	PM	89.947
Solyc01g020600.1.1	Os11g0256400 protein (Fragment) (AHRD V1 *-*- Q0ITH1_ORYSJ)	-	4	-	possibly plastid	plastid	7	C	61.56
Solyc01g021610.1.1	Unknown Protein (AHRD V1)	plastid	5	-	none	plastid	1	N	93.2918
Solyc01g028810.2.1	chaperonin (AHRD V1 ***- B4VMY1_9CYAN); contains Interpro domain(s) IPR001844 Chaperonin plastidn60	plastid	1	Y	plastid	plastid	8	plastid	99.9343
Solyc01g028830.2.1	ATP binding / serine-threonine kinase (AHRD V1 **** C5DB71_VITVI); contains Interpro domain(s) IPR002290 Serine/threonine protein kinase	plastid	4	-	none	plastid	3	plastid	99.1085
Solyc01g028850.1.1	Unknown Protein (AHRD V1); contains Interpro domain(s) IPR010285 Protein of unknown function DUF889, eukaryote	-	3	Y	none	not plastid	0	N	99.6356
Solyc01g028870.2.1	N utilization substance protein B homolog (AHRD V1 *-*- D5S311_CLODI); contains Interpro domain(s) IPR006027 NusB/RsmB/TIM44	plastid	2	Y	plastid	plastid	19	plastid	92.5136
Solyc01g028900.2.1	1-deoxy-D-xylulose-5-phosphate synthase (AHRD V1 **-- DXS_DESAP); contains Interpro domain(s) IPR005475 Transketolase, central region	plastid	5	Y	none	plastid	7	M	99.9922
Solyc01g034030.1.1	Unknown Protein (AHRD V1)	S	4	Y	none	plastid	13	C	77.8249
Solyc01g034200.1.1	Uncharacterized mitochondrial protein AtMg00820 (AHRD V1 **-- M820_ARATH); contains Interpro domain(s) IPR013103 Reverse transcriptase, RNA-dependent DNA polymerase	-	4	-	possibly plastid	not plastid	0	M	78.2756
Solyc01g038220.1.1	Unknown Protein (AHRD V1)	plastid	5	Y	none	not plastid	0	N	86.0595
Solyc01g044360.2.1	Importin beta-3 (AHRD V1 **-- Q16TN4_AEDAE); contains Interpro domain(s) IPR011989 Armadillo-like helical	plastid	4	-	none	plastid	5	C	97.3507
Solyc01g044480.2.1	Elongation factor P (AHRD V1 ***- B6TAH3_MAIZE); contains Interpro domain(s) IPR008991 Translation protein SH3-like	M	1	Y	M	plastid	6	N	54.8065
Solyc01g049630.1.1	Unknown Protein (AHRD V1)	plastid	4	-	none	plastid	2	N	99.638
Solyc01g049680.2.1	Transcriptional activator protein Pur-alpha (AHRD V1 *-*- C1BSV9_9MAXI); contains Interpro domain(s) IPR006628 PUR-alpha/beta/gamma, DNA/RNA-binding	plastid	5	-	none	plastid	2	N	99.0008
Solyc01g049720.1.1	Unknown Protein (AHRD V1)	S	4	-	possibly plastid	plastid	8	EX	99.1999
Solyc01g049770.2.1	Unknown Protein (AHRD V1)	plastid	4	Y	plastid	plastid	8	N	58.4637
Solyc01g049780.1.1	Unknown Protein (AHRD V1)	plastid	4	-	none	plastid	1	N	40.5639
Solyc01g049810.2.1	Pentatricopeptide repeat-containing protein (AHRD V1 ***- D7MLP6_ARALY); contains Interpro domain(s) IPR002885 Pentatricopeptide repeat	-	5	-	none	not plastid	0	plastid	42.7765
Solyc01g049820.2.1	Unknown Protein (AHRD V1)	plastid	2	Y	none	plastid	2	N	56.5736
Solyc01g049930.2.1	Unknown Protein (AHRD V1)	-	5	Y	none	plastid	6	EX	42.8936
Solyc01g049990.1.1	Unknown Protein (AHRD V1)	plastid	4	Y	-	plastid	3	N	51.9355
Solyc01g050020.1.1	Photosystem II plastid47 chlorophyll apoprotein (AHRD V1 ***- B7T460_9ROSI); contains Interpro domain(s) IPR000932 Photosystem antenna protein-like	M	5	-	possibly ER	plastid	5	plastid	99.7702
Solyc01g056210.1.1	Unknown Protein (AHRD V1); contains Interpro domain(s) IPR015410 Region of unknown function DUF1985	plastid	5	-	none	not plastid	0	N	80.1072
Solyc01g056320.1.1	Unknown Protein (AHRD V1)	plastid	4	-	-	plastid	8	N	61.7873
Solyc01g056480.2.1	Unknown Protein (AHRD V1)	plastid	5	Y	plastid	plastid	11	plastid	89.9408
Solyc01g056780.2.1	50S ribosomal protein L34 (AHRD V1 *-*- D7KDQ0_ARALY); contains Interpro domain(s) IPR000271 Ribosomal protein L34	plastid	2	Y	plastid	plastid	9	plastid	99.991
Solyc01g056790.2.1	Exostosin-like (AHRD V1 ***- Q2HVN7_MEDTR); contains Interpro domain(s) IPR004263 Exostosin-like	S	1	Y	ER	plastid	8	PM	93.7453
Solyc01g056880.1.1	Soul heme-binding family protein (AHRD V1 ***- D7L8V8_ARALY); contains Interpro domain(s) IPR006917 SOUL haem-binding protein	-	3	-	possibly plastid	not plastid	0	EX	62.8753
Solyc01g056890.1.1	Unknown Protein (AHRD V1)	-	5	Y	plastid	plastid	3	plastid	99.9282
Solyc01g056900.1.1	Unknown Protein (AHRD V1)	plastid	3	Y	plastid	plastid	8	plastid	97.8469
Solyc01g056950.1.1	Orf141 protein (AHRD V1 *-*- Q5U6D6_BETVU)	plastid	5	-	none	plastid	2	N	93.2051
Solyc01g057070.1.1	Arabidopsis protein targeted to chloroplast protein At3g28460 (AHRD V1 *-*- C7IVV2_9POAL); contains Interpro domain(s) IPR016065 Protein of unknown function methylase putative	plastid	4	-	none	plastid	11	V	49.3313
Solyc01g057130.1.1	Unknown Protein (AHRD V1)	plastid	3	Y	-	not plastid	0	N	72.2431
Solyc01g057140.1.1	Unknown Protein (AHRD V1)	S	5	-	possibly plastid	plastid	2	C	59.2612
Solyc01g057150.1.1	Unknown Protein (AHRD V1)	M	4	Y	none	plastid	10	EX	63.4657
Solyc01g057200.2.1	Pentatricopeptide repeat-containing protein (AHRD V1 ***- D7MMK8_ARALY); contains Interpro domain(s) IPR002885 Pentatricopeptide repeat	plastid	2	Y	plastid	plastid	14	plastid	93.5829
Solyc01g057320.1.1	Kinesin-like protein (AHRD V1 ***- Q75LL2_ORYSJ); contains Interpro domain(s) IPR001752 Kinesin, motor region	plastid	3	Y	none	plastid	4	C	99.9988
Solyc01g057350.1.1	Unknown Protein (AHRD V1)	M	5	Y	none	plastid	8	M	56.9425
Solyc01g057490.2.1	Unknown Protein (AHRD V1)	-	4	Y	none	plastid	10	N	68.8861
Solyc01g057600.2.1	Unknown Protein (AHRD V1)	plastid	2	Y	possibly plastid	plastid	5	N	63.242
Solyc01g057610.1.1	Unknown Protein (AHRD V1)	S	1	Y	-	plastid	1	EX	95.9005
Solyc01g057680.2.1	Hcr2-p4.1 (AHRD V1 ***- Q4G2V7_SOLPI); contains Interpro domain(s) IPR013210 Leucine-rich repeat, N-terminal	S	5	-	possibly plastid	plastid	11	N	57.4562
Solyc01g057740.1.1	RNase H family protein (AHRD V1 ***- Q0KIQ6_SOLDE)	-	3	-	possibly plastid	plastid	6	EX	56.3359
Solyc01g057780.2.1	Zinc finger protein VAR3, chloroplastic (AHRD V1 **-- VAR3_ARATH); contains Interpro domain(s) IPR001876 Zinc finger, RanBP2-type	M	4	Y	possibly M	plastid	12	N	99.082
Solyc01g057830.2.1	30S ribosomal protein S1 (AHRD V1 **-- B4FUZ5_MAIZE); contains Interpro domain(s) IPR003029 Ribosomal protein S1, RNA binding domain	plastid	4	Y	plastid	plastid	14	plastid	94.7124
Solyc01g057960.1.1	Class III homeodomain-leucine zipper (AHRD V1 *-*- Q1WD30_GINBI); contains Interpro domain(s) IPR013978 MEKHLA	-	4	-	possibly plastid	plastid	13	plastid	62.9213
Solyc01g058010.2.1	Neutral invertase (AHRD V1 ***- A7LH71_VITVI); contains Interpro domain(s) IPR006937 Plant neutral invertase	plastid	3	-	none	plastid	3	plastid	74.7579
Solyc01g058060.1.1	Unknown Protein (AHRD V1)	-	5	Y	none	plastid	7	N	76.1111
Solyc01g058140.2.1	Beta-glucosidase A (AHRD V1 *-** B5YCI2_DICT6); contains Interpro domain(s) IPR018120 Glycoside hydrolase, family 1, active site IPR001360 Glycoside hydrolase, family 1	S	1	Y	none	plastid	8	V	57.8258
Solyc01g058190.2.1	30S ribosomal protein S6 (AHRD V1 *-*- B4WXW0_9GAMM); contains Interpro domain(s) IPR000529 Ribosomal protein S6	plastid	2	Y	plastid	not plastid	0	N	98.7597
Solyc01g058240.1.1	Unknown Protein (AHRD V1)	plastid	2	Y	-	plastid	8	EX	67.2381
Solyc01g058340.1.1	Unknown Protein (AHRD V1)	-	3	-	possibly plastid	plastid	1	C	67.8821
Solyc01g058490.1.1	Unknown Protein (AHRD V1)	plastid	2	Y	-	plastid	5	N	97.0418
Solyc01g058500.2.1	Unknown Protein (AHRD V1)	M	5	Y	none	plastid	4	plastid	90.7308
Solyc01g058600.1.1	Unknown Protein (AHRD V1)	M	5	Y	none	plastid	2	M	76.7709
Solyc01g058670.2.1	Transcription factor (AHRD V1 *-** D7L4N5_ARALY)	plastid	3	Y	none	plastid	3	N	91.9735
Solyc01g059870.2.1	Phytochrome B1	M	5	Y	none	plastid	4	C	79.7896
Solyc01g059910.2.1	Pto-like, Serine/threonine kinase protein, resistance protein	M	3	Y	possibly plastid	plastid	13	plastid	77.4195
Solyc01g059960.1.1	GAI-like protein 1 (Fragment) (AHRD V1 **-- A1YWM9_9ROSI); contains Interpro domain(s) IPR005202 GRAS transcription factor	M	5	Y	none	plastid	11	EX	30.6255
Solyc01g060140.2.1	Calmodulin-binding transcription activator 5 (AHRD V1 **** D7MA72_ARALY); contains Interpro domain(s) IPR002110 Ankyrin	-	4	Y	none	not plastid	0	C	95.3978
Solyc01g060150.2.1	Unknown Protein (AHRD V1)	plastid	4	-	none	plastid	2	N	51.4785
Solyc01g060160.1.1	Unknown Protein (AHRD V1)	-	2	-	possibly plastid	plastid	3	C	58.7283
Solyc01g060250.2.1	Unknown Protein (AHRD V1)	plastid	3	Y	possibly M	plastid	7	N	90.0513
Solyc01g060270.1.1	Os06g0207500 protein (Fragment) (AHRD V1 ***- Q0DDQ9_ORYSJ); contains Interpro domain(s) IPR004253 Protein of unknown function DUF231, plant	S	5	Y	none	plastid	13	G	91.4414
Solyc01g060310.1.1	MADS-box transcription factor (AHRD V1 *-*- Q9SEE0_PICAB); contains Interpro domain(s) IPR002100 Transcription factor, MADS-box	plastid	5	Y	none	plastid	4	N	99.3049
Solyc01g060440.1.1	Unknown Protein (AHRD V1)	plastid	5	-	none	not plastid	0	N	98.1954
Solyc01g065590.1.1	Lipoprotein (AHRD V1 **-- C7TFZ9_LACRL)	M	5	Y	possibly plastid	plastid	16	EX	96.2348
Solyc01g065600.1.1	NAD(P)H-quinone oxidoreductase chain 4, chloroplastic (AHRD V1 ***- NU4C_SOLLC); contains Interpro domain(s) IPR001750 NADH:ubiquinone/plastoquinone oxidoreductase	-	4	-	none	not plastid	0	plastid	86.0293
Solyc01g065620.1.1	NAD(P)H-quinone oxidoreductase chain 4, chloroplastic (AHRD V1 ***- NU4C_SOLLC)	S	1	Y	ER	plastid	11	V	56.9119
Solyc01g065670.1.1	WD-repeat protein-like (AHRD V1 ***- Q9FKS9_ARATH)	S	5	-	possibly plastid	plastid	1	M	96.5969
Solyc01g065680.2.1	Unknown Protein (AHRD V1)	plastid	3	-	-	plastid	6	N	91.948
Solyc01g065700.2.1	Integrin-linked kinase-associated serine/threonine phosphatase 2C (AHRD V1 **** ILKAP_BOVIN); contains Interpro domain(s) IPR015655 Protein phosphatase 2C	-	3	-	possibly plastid	plastid	7	M	87.3797
Solyc01g065790.1.1	Unknown Protein (AHRD V1)	M	3	Y	M	plastid	9	M	99.5849
Solyc01g065910.1.1	Periaxin-like protein (AHRD V1 *--- Q940G9_ARATH)	S	4	Y	ER	plastid	9	V	49.6612
Solyc01g065990.1.1	Unknown Protein (AHRD V1)	plastid	2	Y	none	not plastid	0	N	93.6504
Solyc01g066050.2.1	Peptidyl-prolyl cis-trans isomerase FKBP5 (AHRD V1 *--- FKBP5_HUMAN); contains Interpro domain(s) IPR011990 Tetratricopeptide-like helical	plastid	4	Y	none	not plastid	0	C	59.0601
Solyc01g066060.2.1	DAG protein (AHRD V1 ***- B6UD77_MAIZE)	M	5	Y	M	plastid	6	M	80.3963
Solyc01g066210.1.1	Unknown Protein (AHRD V1)	-	3	-	possibly plastid	plastid	4	C	94.9341
Solyc01g066310.2.1	Acyl-CoA dehydrogenase (AHRD V1 *-** A6F634_9ALTE); contains Interpro domain(s) IPR009100 Acyl-CoA dehydrogenase/oxidase, middle and N-terminal	-	5	Y	none	plastid	2	PM	48.9139
Solyc01g066340.2.1	Unknown Protein (AHRD V1)	plastid	5	-	none	not plastid	0	C	93.9933
Solyc01g066390.2.1	Unknown Protein (AHRD V1)	plastid	2	Y	plastid	plastid	5	C	63.8374
Solyc01g066410.1.1	Pectinesterase (AHRD V1 ***- Q4G2Z0_TOBAC); contains Interpro domain(s) IPR000070 Pectinesterase, catalytic	-	5	Y	none	not plastid	0	C	56.5832
Solyc01g066480.2.1	Fumarylacetoacetate hydrolase domain-containing protein 1 (AHRD V1 **-- B6TV71_MAIZE); contains Interpro domain(s) IPR002529 Fumarylacetoacetase, C-terminal-like	plastid	5	Y	M	plastid	17	M	99.2972
Solyc01g066500.1.1	MADS-box transcription factor 22 (AHRD V1 *-*- B6TGW7_MAIZE); contains Interpro domain(s) IPR002100 Transcription factor, MADS-box	-	5	Y	none	plastid	2	N	99.9998
Solyc01g066520.2.1	Dihydrolipoyllysine-residue acetyltransferase component of pyruvate dehydrogenase complex (AHRD V1 ***- C3BP76_9BACI); contains Interpro domain(s) IPR015761 Lipoamide Acyltransferase	M	3	Y	M	plastid	18	M	99.9998
Solyc01g066760.2.1	Unknown Protein (AHRD V1)	plastid	4	-	none	plastid	1	N	86.6529
Solyc01g066830.2.1	Sentrin-specific protease 2 (AHRD V1 *-** B6TMK2_MAIZE); contains Interpro domain(s) IPR003653 Peptidase C48, SUMO/Sentrin/Ubl1	plastid	5	Y	none	plastid	1	N	99.9939
Solyc01g066890.1.1	Unknown Protein (AHRD V1)	M	2	Y	M	plastid	7	M	91.6542
Solyc01g066900.2.1	Os12g0541400 protein (Fragment) (AHRD V1 ***- Q0IMU1_ORYSJ)	plastid	3	Y	none	plastid	3	N	98.0836
Solyc01g067030.2.1	F-box family protein (AHRD V1 ***- B9HCS6_POPTR); contains Interpro domain(s) IPR017451 F-box associated type 1	plastid	3	-	none	not plastid	0	C	29.3762
Solyc01g067130.2.1	Nuclear transcription factor Y subunit B-3 (AHRD V1 **** B6SUG8_MAIZE); contains Interpro domain(s) IPR003957 Transcription factor, CBFA/NFYB, DNA topoisomerase	plastid	4	-	none	plastid	5	N	98.4888
Solyc01g067160.2.1	Unknown Protein (AHRD V1)	-	3	-	possibly plastid	not plastid	0	C	47.8115
Solyc01g067170.1.1	Cullin 1-like protein C (AHRD V1 ***- A0ELU7_PETIN); contains Interpro domain(s) IPR019559 Cullin protein, neddylation domain	M	3	Y	ER	plastid	5	C	49.8955
Solyc01g067190.1.1	Unknown Protein (AHRD V1)	plastid	4	-	none	plastid	6	C	82.5933
Solyc01g067220.1.1	Unknown Protein (AHRD V1)	plastid	2	Y	plastid	plastid	5	N	94.8847
Solyc01g067250.2.1	Cullin 1-like protein C (AHRD V1 ***- A0ELU7_PETIN)	-	3	-	possibly plastid	not plastid	0	C	96.9004
Solyc01g067260.2.1	Cullin 1-like protein C (AHRD V1 ***- A0ELU7_PETIN); contains Interpro domain(s) IPR001373 Cullin, N-terminal	-	4	-	possibly plastid	plastid	7	C	63.4178
Solyc01g067280.2.1	F-box domain containing protein (AHRD V1 ***- B6T548_MAIZE); contains Interpro domain(s) IPR001810 Cyclin-like F-box	plastid	5	-	none	not plastid	0	C	56.9125
Solyc01g067290.2.1	NAD-dependent epimerase/dehydratase (AHRD V1 **-- C8RY11_9RHOB); contains Interpro domain(s) IPR016040 NAD(P)-binding domain	plastid	2	Y	possibly plastid	plastid	14	plastid	87.7529
Solyc01g067370.2.1	Pollen-specific lysine-rich protein SBgLR (AHRD V1 *--- Q6JLA6_SOLTU)	plastid	4	-	none	plastid	4	N	99.6209
Solyc01g067430.1.1	Unknown Protein (AHRD V1)	plastid	1	Y	plastid	plastid	4	N	50.7587
Solyc01g067480.2.1	Kelch-domain-containing protein (AHRD V1 *--- C5FLF8_NANOT); contains Interpro domain(s) IPR015915 Kelch-type beta propeller	M	3	Y	M	plastid	5	M	63.9442
Solyc01g067510.2.1	Receptor-like kinase (AHRD V1 **** A7VM36_MARPO); contains Interpro domain(s) IPR002290 Serine/threonine protein kinase	S	2	Y	ER	plastid	7	PM	69.9361
Solyc01g067520.2.1	Cellulose synthase D-like protein (AHRD V1 **** Q93XQ0_NICAL); contains Interpro domain(s) IPR005150 Cellulose synthase	plastid	3	Y	none	not plastid	0	plastid	96.1442
Solyc01g067530.2.1	GTPase obg (AHRD V1 ***- D5XBC9_THEPJ); contains Interpro domain(s) IPR014100 GTP-binding protein Obg/CgtA	plastid	1	Y	plastid	plastid	19	plastid	63.0553
Solyc01g067540.1.1	Ethylene responsive transcription factor 12 (AHRD V1 *-*- C0J9I3_9ROSA); contains Interpro domain(s) IPR001471 Pathogenesis-related transcriptional factor and ERF, DNA-binding	plastid	3	Y	none	not plastid	0	N	99.99
Solyc01g067580.2.1	Unknown Protein (AHRD V1)	plastid	5	-	none	not plastid	0	N	99.82
Solyc01g067630.2.1	MRNA complete cds clone RAFL24-13-K22 (AHRD V1 ***- Q67YQ9_ARATH)	plastid	1	Y	plastid	plastid	13	plastid	95.9823
Solyc01g067650.1.1	Unknown Protein (AHRD V1)	-	2	Y	none	plastid	4	EX	66.3446
Solyc01g067660.2.1	Beta-amylase (AHRD V1 **** Q5F304_SOYBN); contains Interpro domain(s) IPR013781 Glycoside hydrolase, subgroup, catalytic core	plastid	3	Y	plastid	not plastid	0	C	62.6671
Solyc01g067690.2.1	Unknown Protein (AHRD V1)	plastid	4	-	possibly plastid	plastid	4	N	96.8009
Solyc01g067720.2.1	Vesicle-associated membrane protein-associated protein (AHRD V1 *-*- Q1ANA7_WHEAT); contains Interpro domain(s) IPR000535 Major sperm protein	plastid	5	Y	plastid	plastid	12	PM	53.8497
Solyc01g067730.2.1	Acyl carrier protein (AHRD V1 ***- Q9XF20_CAPCH); contains Interpro domain(s) IPR003231 Acyl carrier protein (Aplastid)	plastid	1	Y	plastid	plastid	14	plastid	99.9856
Solyc01g067740.2.1	Superoxide dismutase (AHRD V1 **** B1Q475_CAPCH); contains Interpro domain(s) IPR001424 Superoxide dismutase, copper/zinc binding	-	5	-	none	not plastid	0	plastid	38.9379
Solyc01g067800.2.1	E3 ubiquitin-protein ligase MARCH1 (AHRD V1 *--* MARH1_MOUSE); contains Interpro domain(s) IPR011016 Zinc finger, RING-CH-type	-	4	Y	none	plastid	1	plastid	49.6969
Solyc01g067810.1.1	Unknown Protein (AHRD V1)	plastid	5	-	none	not plastid	0	N	97.6251
Solyc01g067890.2.1	1-deoxy-D-xylulose 5-phosphate synthase 1 (AHRD V1 ***- C7U110_SOLLC); contains Interpro domain(s) IPR005474 Transketolase, N-terminal IPR005475 Transketolase, central region IPR005477 Deoxyxylulose-5-phosphate synthase	-	4	-	none	plastid	6	plastid	99.6148
Solyc01g067900.2.1	Rapid alkalinization factor 2 (AHRD V1 **-- Q84UC8_9ROSI); contains Interpro domain(s) IPR008801 Rapid ALkalinization Factor	S	1	Y	ER	plastid	1	EX	97.151
Solyc01g067980.1.1	Protein phosphatase-2C (AHRD V1 *-*- O82469_MESCR); contains Interpro domain(s) IPR015655 Protein phosphatase 2C	plastid	4	-	none	plastid	7	plastid	96.9516
Solyc01g067990.1.1	Transducin family protein (AHRD V1 ***- D7MF31_ARALY)	-	5	-	plastid	not plastid	0	plastid	73.749
Solyc01g068010.1.1	Unknown Protein (AHRD V1)	M	5	Y	plastid	plastid	2	N	45.2912
Solyc01g068020.2.1	Cyclase/dehydrase (AHRD V1 ***- B6T2Z5_MAIZE); contains Interpro domain(s) IPR005031 Streptomyces cyclase/dehydrase	plastid	1	Y	plastid	plastid	12	plastid	99.2373
Solyc01g068030.2.1	Cyclase/dehydrase (AHRD V1 ***- B6T2Z5_MAIZE); contains Interpro domain(s) IPR005031 Streptomyces cyclase/dehydrase	plastid	1	Y	plastid	plastid	9	plastid	99.9633
Solyc01g068140.2.1	10-deacetylbaccatin III-10-O-acetyl transferase-like (AHRD V1 **-* Q9FTH0_ORYSJ); contains Interpro domain(s) IPR003480 Transferase	-	3	Y	possibly plastid	plastid	1	PM	65.8294
Solyc01g068180.2.1	Pentatricopeptide repeat-containing protein (AHRD V1 ***- D7MFI7_ARALY); contains Interpro domain(s) IPR002885 Pentatricopeptide repeat	M	4	Y	possibly M	plastid	7	C	98.3118
Solyc01g068200.2.1	Abscisic acid insensitive 8 homologue (Fragment) (AHRD V1 *--- A5A6Q3_TRIMO)	plastid	5	Y	plastid	plastid	7	G	61.8304
Solyc01g068250.2.1	WD-40 repeat family protein (AHRD V1 **-- Q1EPE0_MUSAC); contains Interpro domain(s) IPR017986 WD40 repeat, region	plastid	4	Y	none	not plastid	0	C	83.1006
Solyc01g068290.2.1	tRNA uridine 5-carboxymethylaminomethyl modification enzyme mnmG (AHRD V1 ***- B4VZ14_9CYAN); contains Interpro domain(s) IPR004416 Glucose-inhibited division protein A	plastid	4	Y	plastid	plastid	10	M	90.0991
Solyc01g068380.2.1	Purple acid phosphatase (AHRD V1 *-** B6TKL3_MAIZE); contains Interpro domain(s) IPR004843 Metallophosphoesterase	S	1	Y	ER	not plastid	0	PM	55.4116
Solyc01g068470.2.1	CM0216.540.nc protein (Fragment) (AHRD V1 ***- B0BL99_LOTJA)	plastid	3	Y	plastid	plastid	7	plastid	86.7676
Solyc01g068510.1.1	Unknown Protein (AHRD V1)	S	2	Y	ER	plastid	3	PM	99.9035
Solyc01g068540.2.1	Unknown Protein (AHRD V1); contains Interpro domain(s) IPR017877 MYB-like	plastid	3	Y	none	not plastid	0	N	99.9995
Solyc01g068590.2.1	Unknown Protein (AHRD V1)	-	5	Y	possibly plastid	plastid	9	EX	77.6245
Solyc01g068620.2.1	Cyclase/dehydrase (AHRD V1 *-*- D7E269_NOSA0); contains Interpro domain(s) IPR005031 Streptomyces cyclase/dehydrase	M	4	Y	none	plastid	10	plastid	42.0907
Solyc01g073640.2.1	Uncharacterized oxidoreductase Mb1385 (AHRD V1 ***- Y1385_MYCBO); contains Interpro domain(s) IPR002347 Glucose/ribitol dehydrogenase	S	4	-	none	not plastid	0	plastid	90.473
Solyc01g073720.2.1	Unknown Protein (AHRD V1)	S	2	Y	possibly ER	plastid	6	EX	58.2161
Solyc01g073730.2.1	Molybdenum cofactor biosynthesis protein A (AHRD V1 ***- D0MDU9_RHOM4); contains Interpro domain(s) IPR013483 Molybdenum cofactor biosynthesis protein A	M	3	Y	M	plastid	9	C	98.3878
Solyc01g073740.2.1	Citrate synthase (AHRD V1 ***- O24135_TOBAC); contains Interpro domain(s) IPR010109 Citrate synthase, eukaryotic	M	2	Y	M	plastid	2	M	96.1716
Solyc01g073770.2.1	PRLI-interacting factor A (AHRD V1 *-*- B6TGN5_MAIZE)	M	4	Y	none	plastid	7	N	68.5155
Solyc01g073870.2.1	ATP synthase subunit-like protein (AHRD V1 *-*- Q6YWH6_ORYSJ)	plastid	5	-	none	not plastid	0	N	86.8408
Solyc01g073920.2.1	Unknown Protein (AHRD V1)	plastid	4	Y	none	not plastid	0	C	66.4792
Solyc01g073930.2.1	N-terminal asparagine amidohydrolase family protein (AHRD V1 **** D7LLL3_ARALY)	plastid	4	-	possibly plastid	plastid	3	C	65.0564
Solyc01g073940.2.1	Zinc finger CCCH domain-containing protein 14 (AHRD V1 ***- C3H14_ORYSJ); contains Interpro domain(s) IPR018111 K Homology, type 1, subgroup	-	4	Y	none	not plastid	0	M	90.4762
Solyc01g073970.2.1	Histone H3 (AHRD V1 ***- D8L9K7_WHEAT); contains Interpro domain(s) IPR000164 Histone H3	plastid	3	Y	none	plastid	2	N	99.991
Solyc01g074000.2.1	Histone H3 (AHRD V1 ***- D8L9K7_WHEAT); contains Interpro domain(s) IPR000164 Histone H3	plastid	3	Y	none	plastid	2	N	99.991
Solyc01g074030.2.1	Beta-glucosidase 01 (AHRD V1 ***- B5M9E4_SOLLC); contains Interpro domain(s) IPR013781 Glycoside hydrolase, subgroup, catalytic core	S	1	Y	ER	plastid	8	ER	99.7842
Solyc01g079090.2.1	Protoporphyrinogen oxidase (AHRD V1 ***- O64384_SOLTU); contains Interpro domain(s) IPR004572 Protoporphyrinogen oxidase	plastid	1	Y	plastid	plastid	12	plastid	99.5227
Solyc01g079110.2.1	Histone H3 (AHRD V1 ***- D8L9K7_WHEAT); contains Interpro domain(s) IPR000164 Histone H3	plastid	3	Y	none	plastid	2	N	99.991
Solyc01g079120.2.1	Unknown Protein (AHRD V1)	plastid	2	Y	none	plastid	3	N	66.7139
Solyc01g079220.2.1	NifU like protein (AHRD V1 *-*- B8BR62_THAPS); contains Interpro domain(s) IPR001075 NIF system FeS cluster assembly, NifU, C-terminal	plastid	3	Y	plastid	plastid	11	plastid	96.7067
Solyc01g079270.1.1	Unknown Protein (AHRD V1); contains Interpro domain(s) IPR001092 Basic helix-loop-helix dimerisation region bHLH	-	4	-	possibly plastid	plastid	3	N	96.0221
Solyc01g079360.2.1	WRKY transcription factor 3 (AHRD V1 ***- C9DHZ2_9ROSI); contains Interpro domain(s) IPR003657 DNA-binding WRKY	M	3	Y	none	plastid	3	N	99.9826
Solyc01g079380.1.1	GRAS transcription factor (Fragment) (AHRD V1 **-* A2Q2Y2_MEDTR); contains Interpro domain(s) IPR005202 GRAS transcription factor	plastid	5	-	none	plastid	2	C	86.6281
Solyc01g079400.2.1	Os06g0207500 protein (Fragment) (AHRD V1 ***- Q0DDQ9_ORYSJ); contains Interpro domain(s) IPR004253 Protein of unknown function DUF231, plant	S	5	Y	ER	not plastid	0	G	55.3166
Solyc01g079420.2.1	Cytochrome c oxidase subunit VC family protein (AHRD V1 *-*- D7LT63_ARALY); contains Interpro domain(s) IPR008432 Cytochrome c oxidase subunit Vc	-	4	-	possibly plastid	not plastid	0	M	99.7388
Solyc01g079450.2.1	Peptidase S9 prolyl oligopeptidase active site domain protein (AHRD V1 ***- B4SK00_STRM5); contains Interpro domain(s) IPR001375 Peptidase S9, prolyl oligopeptidase active site region	plastid	3	Y	plastid	plastid	17	plastid	50.1791
Solyc01g079470.2.1	plastid12 (AHRD V1 ***- O24136_TOBAC); contains Interpro domain(s) IPR003823 Protein of unknown function plastid12	plastid	1	Y	plastid	plastid	10	C	56.6201
Solyc01g079480.2.1	BZIP transcription factor (AHRD V1 **-* Q1HW69_CAPAN); contains Interpro domain(s) IPR011616 bZIP transcription factor, bZIP-1	plastid	2	Y	none	not plastid	0	N	100
Solyc01g079490.2.1	Protein fat-free homolog (AHRD V1 ***- FFR_DICDI); contains Interpro domain(s) IPR014812 Vps51/Vps67	-	2	Y	none	plastid	1	N	65.5535
Solyc01g079520.2.1	DNA mismatch repair protein muts (AHRD V1 ***- Q16P35_AEDAE); contains Interpro domain(s) IPR017261 DNA mismatch repair protein Msh6	plastid	3	Y	possibly plastid	plastid	15	N	99.9011
Solyc01g079570.2.1	Beta xylosidase (AHRD V1 ***- Q6RXY3_FRAAN); contains Interpro domain(s) IPR001764 Glycoside hydrolase, family 3, N-terminal	S	2	Y	ER	plastid	13	PM	87.1316
Solyc01g079600.2.1	Lipase (AHRD V1 *-*- C1FIH0_9CHLO); contains Interpro domain(s) IPR002921 Lipase, class 3	-	4	Y	plastid	plastid	3	plastid	51.3612
Solyc01g079630.2.1	Unknown Protein (AHRD V1)	plastid	5	-	none	plastid	11	plastid	48.2094
Solyc01g079640.2.1	Unknown Protein (AHRD V1)	plastid	2	Y	none	plastid	9	N	99.3545
Solyc01g079680.2.1	Ran GTPase activating protein (Fragment) (AHRD V1 **-* A7M8K5_NICBE); contains Interpro domain(s) IPR003590 Leucine-rich repeat, ribonuclease inhibitor subtype	plastid	4	-	none	plastid	6	N	89.0416
Solyc01g079790.2.1	Glucose-1-phosphate adenylyltransferase (AHRD V1 **** P93230_SOLLC); contains Interpro domain(s) IPR011831 Glucose-1-phosphate adenylyltransferase	-	4	-	none	plastid	8	plastid	99.625
Solyc01g079800.2.1	ATP-dependent RNA helicase (AHRD V1 ***- A0YWB9_LYNSP); contains Interpro domain(s) IPR011545 DNA/RNA helicase, DEAD/DEAH box type, N-terminal	plastid	3	Y	plastid	plastid	12	plastid	88.301
Solyc01g079820.2.1	Redoxin domain protein (AHRD V1 **-- A1WHD5_VEREI); contains Interpro domain(s) IPR013740 Redoxin	M	4	Y	M	plastid	3	M	98.0429
Solyc01g079860.2.1	Carbohydrate kinase YjeF related protein (AHRD V1 **-- A3DLN4_STAMF); contains Interpro domain(s) IPR000631 Uncharacterised protein family, carbohydrate kinase-related	-	3	-	none	not plastid	0	plastid	84.5231
Solyc01g079870.2.1	Nuclear transcription factor Y subunit C-2 (AHRD V1 *-** B4FLF9_MAIZE); contains Interpro domain(s) IPR003958 Transcription factor CBF/NF-Y/archaeal histone	-	2	Y	none	not plastid	0	N	99.9909
Solyc01g079880.2.1	Asparagine synthetase (AHRD V1 *--- Q9ZST6_ARATH)	plastid	3	Y	possibly plastid	plastid	2	C	99.3261
Solyc01g079900.1.1	Xylanase inhibitor (Fragment) (AHRD V1 **-- Q53IQ3_WHEAT); contains Interpro domain(s) IPR001461 Peptidase A1	-	3	Y	none	plastid	13	C	71.1239
Solyc01g079960.2.1	Xylanase inhibitor (Fragment) (AHRD V1 **-- Q53IQ3_WHEAT); contains Interpro domain(s) IPR001461 Peptidase A1	S	2	Y	ER	plastid	13	PM	54.4958
Solyc01g079970.2.1	Xylanase inhibitor (Fragment) (AHRD V1 **-- Q53IQ3_WHEAT); contains Interpro domain(s) IPR001461 Peptidase A1	S	1	Y	ER	plastid	6	PM	39.042
Solyc01g079980.2.1	Xylanase inhibitor (Fragment) (AHRD V1 **-- Q53IQ3_WHEAT); contains Interpro domain(s) IPR001461 Peptidase A1	S	1	Y	ER	plastid	13	V	54.9853
Solyc01g079990.1.1	Xylanase inhibitor (Fragment) (AHRD V1 **-- Q53IQ3_WHEAT); contains Interpro domain(s) IPR001461 Peptidase A1	plastid	3	Y	none	plastid	5	plastid	98.7767
Solyc01g080090.2.1	Zinc finger RING-type protein (AHRD V1 *-*- B3U2A9_CUCSA)	M	5	-	possibly plastid	plastid	14	EX	75.9051
Solyc01g080140.2.1	Dolichol-phosphate mannosyltransferase (AHRD V1 **-- C0NU33_AJECG); contains Interpro domain(s) IPR013744 Protein of unknown function DUF1749	plastid	2	Y	possibly plastid	plastid	11	plastid	98.4835
Solyc01g080150.2.1	tRNA dimethylallyltransferase (AHRD V1 *-*- B6JYB4_SCHJY); contains Interpro domain(s) IPR002627 tRNA isopentenyltransferase	-	5	-	possibly plastid	plastid	2	M	53.6296
Solyc01g080180.2.1	Structural constituent of ribosome (AHRD V1 *--- D7LAI5_ARALY); contains Interpro domain(s) IPR008195 Ribosomal protein L34e	plastid	4	Y	none	not plastid	0	PM	94.708
Solyc01g080190.2.1	Pentatricopeptide repeat-containing protein (AHRD V1 ***- D7LYJ7_ARALY); contains Interpro domain(s) IPR002885 Pentatricopeptide repeat	S	5	Y	ER	plastid	4	V	58.3134
Solyc01g080220.2.1	Dienelactone hydrolase family protein (AHRD V1 **-- D7L3C7_ARALY); contains Interpro domain(s) IPR002925 Dienelactone hydrolase	-	2	-	none	plastid	3	plastid	90.3893
Solyc01g080250.2.1	BTB/POZ domain containing protein expressed (AHRD V1 ***- Q10C73_ORYSJ); contains Interpro domain(s) IPR013089 Kelch related	plastid	3	Y	none	plastid	9	C	88.1675
Solyc01g080280.2.1	Glutamine synthetase (AHRD V1 ***- B5LAU9_CAPAN); contains Interpro domain(s) IPR008146 Glutamine synthetase, catalytic region	plastid	2	Y	plastid	plastid	13	plastid	91.8159
Solyc01g080300.2.1	Cobalt transport protein (AHRD V1 ***- Q4C386_CROWT); contains Interpro domain(s) IPR003339 Cobalt transport protein	-	5	-	plastid	plastid	4	P	73.8849
Solyc01g080360.2.1	MHD domain-containing death-inducing protein (AHRD V1 *--- MUDEN_HUMAN); contains Interpro domain(s) IPR008968 Clathrin adaptor, mu subunit, C-terminal	plastid	5	-	possibly plastid	plastid	9	C	94.0549
Solyc01g080370.2.1	Glycosyltransferase (AHRD V1 *-*- B9HK74_POPTR); contains Interpro domain(s) IPR002495 Glycosyl transferase, family 8	plastid	2	Y	possibly plastid	plastid	8	G	98.5863
Solyc01g080440.1.1	Unknown Protein (AHRD V1)	plastid	5	-	none	plastid	3	N	67.6939
Solyc01g080460.2.1	Pyruvate phosphate dikinase (AHRD V1 ***- Q84N32_SORBI); contains Interpro domain(s) IPR010121 Pyruvate, phosphate dikinase	-	3	-	possibly M	plastid	11	plastid	99.6095
Solyc01g080480.2.1	Endonuclease/exonuclease/phosphatase family protein (AHRD V1 ***- D7L0T9_ARALY); contains Interpro domain(s) IPR005135 Endonuclease/exonuclease/phosphatase	plastid	4	-	plastid	plastid	19	C	82.5018
Solyc01g080600.2.1	Histone H3 (AHRD V1 ***- D8L9K7_WHEAT); contains Interpro domain(s) IPR000164 Histone H3	plastid	3	Y	none	plastid	2	N	99.991
Solyc01g080640.2.1	Multidrug resistance protein ABC transporter family (AHRD V1 **-- B9GS96_POPTR); contains Interpro domain(s) IPR001140 ABC transporter, transmembrane region	S	5	Y	plastid	not plastid	0	PM	75.7108
Solyc01g080650.2.1	Unknown Protein (AHRD V1)	plastid	4	Y	-	plastid	1	N	98.1773
Solyc01g080660.2.1	Splicing factor arginine/serine-rich 4 (AHRD V1 *--- B6THS7_MAIZE); contains Interpro domain(s) IPR012677 Nucleotide-binding, alpha-beta plait	plastid	5	-	possibly M	not plastid	0	N	99.1514
Solyc01g080720.2.1	Pentatricopeptide repeat-containing protein (AHRD V1 ***- D7L610_ARALY); contains Interpro domain(s) IPR002885 Pentatricopeptide repeat	M	1	Y	M	plastid	8	C	99.2785
Solyc01g080740.1.1	Ulp1 protease family C-terminal catalytic domain containing protein (AHRD V1 *-*- Q60D46_SOLDE); contains Interpro domain(s) IPR003653 Peptidase C48, SUMO/Sentrin/Ubl1	plastid	3	Y	none	plastid	2	N	93.8161
Solyc01g080760.2.1	Unknown Protein (AHRD V1)	plastid	1	Y	plastid	plastid	19	V	77.904
Solyc01g080770.2.1	Receptor like kinase, RLK	S	2	Y	ER	plastid	9	PM	99.9875
Solyc01g080810.2.1	Isoleucyl-tRNA synthetase (AHRD V1 ***- Q9FI67_ARATH); contains Interpro domain(s) IPR002301 Isoleucyl-tRNA synthetase, class Ia IPR018353 Isoleucyl-tRNA synthetase	plastid	4	Y	plastid	plastid	10	M	78.6117
Solyc01g080830.2.1	cDNA clone J023109D15 full insert sequence (AHRD V1 ***- B7EQP2_ORYSJ); contains Interpro domain(s) IPR004038 Ribosomal protein L7Ae/L30e/S12e/Gadd45	-	3	-	possibly plastid	plastid	10	C	85.0925
Solyc01g080840.2.1	Protein translocase subunit secA (AHRD V1 ***- B9I9A8_POPTR); contains Interpro domain(s) IPR000185 SecA protein	plastid	2	Y	none	plastid	1	N	77.3603
Solyc01g080850.2.1	Protein transport protein SEC23 (AHRD V1 ***- C5MDU5_CANTT); contains Interpro domain(s) IPR006900 Sec23/Sec24 helical region	plastid	5	Y	none	plastid	13	plastid	73.5871
Solyc01g080860.2.1	Protoheme IX farnesyltransferase (AHRD V1 ***- B6TRR8_MAIZE); contains Interpro domain(s) IPR006369 Protohaem IX farnesyltransferase	plastid	4	Y	M	plastid	11	M	99.2549
Solyc01g080960.2.1	AT-hook DNA-binding protein (Fragment) (AHRD V1 *--* A1DR79_CATRO); contains Interpro domain(s) IPR014476 Predicted AT-hook DNA-binding	-	3	-	possibly plastid	plastid	3	N	94.1586
Solyc01g081020.1.1	Pentatricopeptide repeat-containing protein (AHRD V1 ***- D7MAN3_ARALY); contains Interpro domain(s) IPR002885 Pentatricopeptide repeat	plastid	4	Y	plastid	plastid	4	plastid	99.3522
Solyc01g081080.1.1	Replication factor C subunit (AHRD V1 *-*- B8BYF4_THAPS); contains Interpro domain(s) IPR019483 DNA polymerase III, clamp-loader complex, subunit E, C-terminal	plastid	4	-	none	plastid	3	N	99.8104
Solyc01g081110.2.1	Pentatricopeptide repeat-containing protein (AHRD V1 ***- D7KHY5_ARALY); contains Interpro domain(s) IPR002885 Pentatricopeptide repeat	-	4	-	possibly plastid	plastid	2	C	83.1847
Solyc01g081140.1.1	Phototropic-responsive NPH3 family protein (AHRD V1 **-- D7L161_ARALY); contains Interpro domain(s) IPR004249 NPH3	plastid	4	Y	none	plastid	6	C	98.1883
Solyc01g081290.2.1	Pentatricopeptide repeat-containing protein (AHRD V1 ***- D7L173_ARALY); contains Interpro domain(s) IPR002290 Serine/threonine protein kinase	plastid	4	-	possibly plastid	plastid	8	C	99.996
Solyc01g081300.2.1	Phosphoribosylaminoimidazole-succinocarboxamide synthase (AHRD V1 **** Q6T7F0_TOBAC); contains Interpro domain(s) IPR001636 SAICAR synthetase	plastid	3	Y	plastid	not plastid	0	plastid	99.9935
Solyc01g081320.2.1	Pentatricopeptide repeat-containing protein (AHRD V1 ***- D7M643_ARALY); contains Interpro domain(s) IPR002885 Pentatricopeptide repeat	plastid	4	Y	none	plastid	12	C	95.6894
Solyc01g081330.2.1	Chaperone protein dnaJ (AHRD V1 ***- B6TA99_MAIZE); contains Interpro domain(s) IPR003095 Heat shock protein DnaJ	plastid	4	-	none	plastid	10	M	67.9071
Solyc01g081370.2.1	Aspartic proteinase nepenthesin I (AHRD V1 **-- A9ZMF9_NEPAL); contains Interpro domain(s) IPR001461 Peptidase A1	S	1	Y	ER	plastid	5	V	72.1903
Solyc01g081390.2.1	Glucose 6 phosphate/phosphate translocator-like protein (AHRD V1 **** Q9LF61_ARATH); contains Interpro domain(s) IPR004696 Tpt phosphate/phosphoenolpyruvate translocator	plastid	1	Y	plastid	plastid	18	plastid	99.9894
Solyc01g081430.2.1	Expressed protein (Fragment) (AHRD V1 ***- Q108V0_ORYSJ)	plastid	5	-	none	not plastid	0	C	91.4841
Solyc01g081440.2.1	Unknown Protein (AHRD V1); contains Interpro domain(s) IPR010410 Protein of unknown function DUF1005	plastid	5	Y	plastid	plastid	5	PM	56.32
Solyc01g081460.2.1	tRNA (guanine-N(7)-)-methyltransferase (AHRD V1 ***- D8G8F8_9CYAN); contains Interpro domain(s) IPR003358 tRNA (guanine-N-7) methyltransferase	plastid	3	Y	plastid	plastid	12	plastid	41.9906
Solyc01g081470.2.1	Ubiquinone/menaquinone biosynthesis methyltransferase ubiE (AHRD V1 ***- D0N8X4_PHYIN); contains Interpro domain(s) IPR004033 UbiE/COQ5 methyltransferase	M	1	Y	M	plastid	2	M	97.4069
Solyc01g081480.2.1	Genomic DNA chromosome 5 P1 clone MVA3 (AHRD V1 **-- Q9FN84_ARATH)	S	4	Y	possibly plastid	plastid	14	plastid	98.1647
Solyc01g081490.2.1	RNA polymerase sigma factor (AHRD V1 *-*- Q59965_SYNP2); contains Interpro domain(s) IPR016262 RNA polymerase sigma factor, SigB/SigC/SigD, plastid	plastid	4	Y	plastid	plastid	12	V	74.8962
Solyc01g081530.1.1	Annexin 3 (AHRD V1 *-*- A9X4R3_BRAJU); contains Interpro domain(s) IPR015472 Annexin like protein IPR001464 Annexin	-	2	-	possibly plastid	plastid	2	C	99.9383
Solyc01g081560.2.1	Pentatricopeptide repeat-containing protein (AHRD V1 ***- D7MHD4_ARALY); contains Interpro domain(s) IPR002885 Pentatricopeptide repeat	M	2	Y	possibly M	plastid	11	G	49.6158
Solyc01g086640.2.1	Os03g0169000 protein (Fragment) (AHRD V1 ***- Q0DUS7_ORYSJ); contains Interpro domain(s) IPR004348 Protein of unknown function DUF246, plant	-	5	Y	none	not plastid	0	G	91.1252
Solyc01g086650.2.1	Siroheme synthase (AHRD V1 ***- A3LD64_PSEAE); contains Interpro domain(s) IPR006366 Uroporphyrin-III C-methyltransferase, C-terminal	plastid	2	Y	plastid	plastid	21	plastid	99.664
Solyc01g086660.2.1	Unknown Protein (AHRD V1)	plastid	2	Y	-	plastid	6	N	67.3776
Solyc01g086670.2.1	Unknown Protein (AHRD V1)	plastid	2	Y	-	plastid	6	N	93.5177
Solyc01g086700.2.1	Phosphoribosylanthranilate transferase (Fragment) (AHRD V1 *--- Q43085_PEA); contains Interpro domain(s) IPR013583 Phosphoribosyltransferase C-terminal, plant	plastid	5	-	none	not plastid	0	C	96.7438
Solyc01g086740.2.1	Chaperone protein dnaJ (AHRD V1 ***- B6TA99_MAIZE); contains Interpro domain(s) IPR012724 Chaperone DnaJ	M	1	Y	M	plastid	11	M	99.9483
Solyc01g086750.2.1	Protein TIF31 homolog (AHRD V1 ***- TIF31_COCIM); contains Interpro domain(s) IPR011990 Tetratricopeptide-like helical	M	3	Y	possibly M	plastid	7	M	73.5096
Solyc01g086760.2.1	Histone H3 (AHRD V1 ***- B6SYV0_MAIZE); contains Interpro domain(s) IPR000164 Histone H3	plastid	2	Y	none	plastid	4	N	97.8921
Solyc01g086770.1.1	Unknown Protein (AHRD V1)	-	3	-	possibly plastid	plastid	1	PM	99.5905
Solyc01g086790.1.1	Unknown Protein (AHRD V1)	plastid	4	Y	none	not plastid	0	N	90.821
Solyc01g086800.2.1	Histone H3 (AHRD V1 **** Q53NE3_ORYSJ); contains Interpro domain(s) IPR000164 Histone H3	plastid	4	Y	none	plastid	2	N	99.9966
Solyc01g086820.2.1	Histone H3 (AHRD V1 ***- D8L9K7_WHEAT); contains Interpro domain(s) IPR000164 Histone H3	plastid	3	Y	none	plastid	2	N	99.991
Solyc01g086830.2.1	Protease inhibitor/seed storage/lipid transfer protein family protein (AHRD V1 **** D7L6K8_ARALY); contains Interpro domain(s) IPR003612 Plant lipid transfer protein/seed storage/trypsin-alpha amylase inhibitor	plastid	5	Y	ER	plastid	14	EX	96.7561
Solyc01g086900.2.1	RNA methyltransferase TrmH group 2 (AHRD V1 *-*- Q3M884_ANAVT); contains Interpro domain(s) IPR001537 tRNA/rRNA methyltransferase, SpoU	M	4	Y	plastid	plastid	13	plastid	77.4039
Solyc01g086910.2.1	Unknown Protein (AHRD V1)	plastid	5	Y	possibly M	plastid	10	EX	50.6767
Solyc01g086920.2.1	LRR receptor-like serine/threonine-protein kinase, RLP	M	4	Y	possibly M	plastid	13	M	41.3939
Solyc01g087040.2.1	Thylakoid lumenal 19 kDa protein, chloroplastic (AHRD V1 ***- TL19_ARATH); contains Interpro domain(s) IPR016123 Mog1/PsbP, alpha/beta/alpha sandwich	plastid	1	Y	plastid	plastid	12	plastid	93.9114
Solyc01g087070.2.1	Mitochondrial ADP/ATP carrier proteins (AHRD V1 **** Q2UU95_ASPOR); contains Interpro domain(s) IPR002113 Adenine nucleotide translocator 1	M	3	Y	none	plastid	9	M	99.9977
Solyc01g087160.2.1	Unknown Protein (AHRD V1)	plastid	4	-	possibly plastid	not plastid	0	N	88.276
Solyc01g087190.2.1	Chaperonin-like protein (AHRD V1 *-*- Q2LJI6_9NOSO); contains Interpro domain(s) IPR003435 Chaperonin-like RbcX	plastid	2	Y	possibly plastid	plastid	12	N	49.132
Solyc01g087200.2.1	Cc-nbs-lrr, resistance protein	-	5	-	plastid	plastid	4	C	86.3679
Solyc01g087290.2.1	TRNA-dihydrouridine synthase (AHRD V1 ***- A2VQL7_9BURK); contains Interpro domain(s) IPR001269 tRNA-dihydrouridine synthase	M	5	Y	M	plastid	4	plastid	77.5471
Solyc01g087430.2.1	PHD zinc finger-containing protein (AHRD V1 *--- D3BN85_POLPA); contains Interpro domain(s) IPR011011 Zinc finger, FYVE/PHD-type	M	3	Y	plastid	plastid	13	N	99.9801
Solyc01g087440.2.1	Protein EFR3 homolog B (AHRD V1 ***- EFR3B_DANRE)	plastid	3	-	none	plastid	6	C	55.601
Solyc01g087460.1.1	Protein phosphatase 2C (AHRD V1 ***- Q6QLU0_SOLLC); contains Interpro domain(s) IPR015655 Protein phosphatase 2C	M	5	Y	possibly M	plastid	6	M	95.475
Solyc01g087490.2.1	CONSTANS interacting protein 6 (Fragment) (AHRD V1 **-- Q2VY13_SOLLC); contains Interpro domain(s) IPR004082 Protein of unknown function DUF1423, plant	plastid	4	Y	none	plastid	4	N	49.438
Solyc01g087520.2.1	Ferredoxin-thioredoxin reductase variable chain (AHRD V1 *-*- B6UCW8_MAIZE); contains Interpro domain(s) IPR004207 Ferredoxin thioredoxin reductase, alpha chain	plastid	1	Y	plastid	plastid	12	plastid	100
Solyc01g087600.2.1	Protein E03H4.4 partially confirmed by transcript evidence (AHRD V1 *-*- O17744_CAEEL)	-	2	Y	none	plastid	4	P	39.4314
Solyc01g087660.2.1	Unknown Protein (AHRD V1)	plastid	5	Y	none	plastid	1	C	51.4254
Solyc01g087680.2.1	Uncharacterized membrane protein (AHRD V1 ***- A5GLU3_SYNPW); contains Interpro domain(s) IPR016804 Uncharacterised conserved protein Uplastid022348	plastid	4	Y	plastid	plastid	13	plastid	68.7049
Solyc01g087690.1.1	RNA polymerase sigma factor (AHRD V1 ***- Q59965_SYNP2); contains Interpro domain(s) IPR013325 RNA polymerase sigma factor, region 2	S	5	Y	plastid	plastid	3	N	98.6423
Solyc01g087700.1.1	Unknown Protein (AHRD V1)	S	1	Y	ER	plastid	6	EX	94.3627
Solyc01g087710.2.1	Uncharacterized membrane protein (AHRD V1 ***- A5GLU3_SYNPW); contains Interpro domain(s) IPR005134 Uncharacterised protein family UPF0114	plastid	2	Y	none	plastid	11	PM	60.8883
Solyc01g087730.2.1	50S ribosomal protein L1 (AHRD V1 ***- A8YGI8_MICAE); contains Interpro domain(s) IPR005878 Ribosomal protein L1, bacterial-type	plastid	2	Y	possibly plastid	plastid	14	plastid	99.6392
Solyc01g087750.2.1	Homology to unknown gene (Fragment) (AHRD V1 ***- Q015C3_OSTTA)	plastid	2	Y	plastid	plastid	13	plastid	99.9361
Solyc01g087770.2.1	Subtilisin-like protease (AHRD V1 **-- O82777_SOLLC); contains Interpro domain(s) IPR015500 Peptidase S8, subtilisin-related	-	4	-	none	not plastid	0	plastid	81.7762
Solyc01g087860.2.1	Unknown Protein (AHRD V1)	-	3	Y	none	plastid	3	C	60.0065
Solyc01g087870.2.1	Glucosamine--fructose-6-phosphate aminotransferase (AHRD V1 ***- A8IZE7_CHLRE); contains Interpro domain(s) IPR005855 Glucosamine-fructose-6-phosphate aminotransferase, isomerising	M	5	-	none	plastid	1	plastid	83.0739
Solyc01g087880.2.1	Unknown Protein (AHRD V1)	plastid	5	Y	none	not plastid	0	N	99.2611
Solyc01g087920.1.1	Serine carboxypeptidase 1 (AHRD V1 **** B6SW38_MAIZE); contains Interpro domain(s) IPR001563 Peptidase S10, serine carboxypeptidase	S	1	Y	ER	plastid	13	EX	60.1378
Solyc01g088030.2.1	Structure-specific endonuclease subunit slx1 (AHRD V1 *-*- D3PJZ8_9MAXI); contains Interpro domain(s) IPR000305 Excinuclease ABC, C subunit, N-terminal	plastid	2	Y	possibly M	not plastid	0	N	91.4548
Solyc01g088070.2.1	Nbs-lrr resistance protein (AHRD V1 *-*- B9GV80_POPTR)	-	5	-	possibly plastid	plastid	3	C	97.0559
Solyc01g088090.2.1	Hydrolase alpha/beta fold family protein (AHRD V1 ***- D7M5W5_ARALY); contains Interpro domain(s) IPR000073 Alpha/beta hydrolase fold-1	-	5	-	possibly plastid	plastid	12	PM	80.8069
Solyc01g088110.1.1	Unknown Protein (AHRD V1)	S	5	-	plastid	plastid	4	C	90.5611
Solyc01g088120.1.1	Unknown Protein (AHRD V1)	S	4	Y	ER	plastid	14	EX	82.0327
Solyc01g088130.2.1	CST complex subunit STN1 (AHRD V1 ***- STN1_ARATH); contains Interpro domain(s) IPR012340 Nucleic acid-binding, OB-fold	-	5	Y	none	plastid	3	C	81.9536
Solyc01g088250.2.1	IQ-domain 11 (AHRD V1 ***- D7M5A6_ARALY); contains Interpro domain(s) IPR000048 IQ calmodulin-binding region	plastid	5	Y	possibly M	plastid	1	C	74.5474
Solyc01g088290.1.1	Germin-like protein 5 (AHRD V1 ***- A8QK91_VITVI); contains Interpro domain(s) IPR014710 RmlC-like jelly roll fold	S	5	Y	none	plastid	2	EX	99.9898
Solyc01g088310.2.1	Geranylgeranyl reductase (AHRD V1 ***- Q09JZ1_BRARP); contains Interpro domain(s) IPR011774 Geranylgeranyl reductase, plants and cyanobacteria	-	5	Y	possibly plastid	plastid	14	plastid	65.1001
Solyc01g088350.2.1	NADH dehydrogenase (AHRD V1 *--- NDUF3_XENTR); contains Interpro domain(s) IPR007523 Protein of unknown function DUF498	M	2	Y	M	plastid	13	M	89.291
Solyc01g088360.2.1	Glucosamine--fructose-6-phosphate aminotransferase (AHRD V1 *-*- GLMS_GLUOX); contains Interpro domain(s) IPR005854 Amidophosphoribosyl transferase	plastid	2	Y	plastid	plastid	14	plastid	99.9942
Solyc01g088380.1.1	DNA helicase (AHRD V1 ***- A6ZT72_YEAS7); contains Interpro domain(s) IPR014808 DNA replication factor Dna2	plastid	5	Y	none	plastid	4	N	99.9508
Solyc01g088460.2.1	Unknown Protein (AHRD V1)	plastid	1	Y	plastid	plastid	15	N	87.408
Solyc01g088470.2.1	50S ribosomal protein L18 family (AHRD V1 ***- D7LAX4_ARALY); contains Interpro domain(s) IPR005484 Ribosomal protein L18/L5	plastid	4	Y	none	not plastid	0	C	92.3171
Solyc01g088580.1.1	Invertase inhibitor (AHRD V1 ***- A7IZL0_COFCA); contains Interpro domain(s) IPR006501 Pectinesterase inhibitor	M	4	Y	possibly M	plastid	12	plastid	78.7563
Solyc01g088590.2.1	Invertase inhibitor (AHRD V1 ***- A7IZL0_COFCA); contains Interpro domain(s) IPR006501 Pectinesterase inhibitor	S	1	Y	ER	plastid	3	EX	97.6981
Solyc01g088610.2.1	chaperonin (AHRD V1 ***- B5IMI3_9CHRO); contains Interpro domain(s) IPR001476 Chaperonin plastidn10	plastid	1	Y	plastid	plastid	13	plastid	99.9881
Solyc01g088630.1.1	RING finger protein (AHRD V1 *-*- C6EUD3_SOYBN); contains Interpro domain(s) IPR018957 Zinc finger, C3HC4 RING-type	plastid	4	Y	plastid	plastid	5	V	67.0457
Solyc01g088640.2.1	Ring finger protein 12 (AHRD V1 *-*- Q4V889_RAT); contains Interpro domain(s) IPR018957 Zinc finger, C3HC4 RING-type	plastid	3	Y	none	plastid	4	N	95.8767
Solyc01g088670.1.1	Pentatricopeptide repeat-containing protein (AHRD V1 ***- D7M761_ARALY); contains Interpro domain(s) IPR002885 Pentatricopeptide repeat	M	2	Y	M	plastid	13	M	80.6394
Solyc01g088700.2.1	Eukaryotic translation initiation factor 4 gamma 1 (AHRD V1 *-*- A9QXE6_MESAU); contains Interpro domain(s) IPR016021 MIF4-like, type 1/2/3	M	5	Y	none	not plastid	0	N	99.2918
Solyc01g088710.2.1	Metacaspase (AHRD V1 ***- A8NU42_COPC7); contains Interpro domain(s) IPR011600 Peptidase C14, caspase catalytic	plastid	5	-	possibly plastid	plastid	11	plastid	47.4957
Solyc01g088780.2.1	Rho-related GTP-binding protein RhoC (AHRD V1 **-- RHOC_PONAB); contains Interpro domain(s) IPR003578 Ras small GTPase, Rho type	-	2	Y	none	plastid	4	C	99.1712
Solyc01g088800.2.1	Polyadenylate-binding protein (AHRD V1 *--- C1GL98_PARBD); contains Interpro domain(s) IPR000504 RNA recognition motif, RNP-1	plastid	5	Y	none	plastid	2	N	99.4824
Solyc01g088820.2.1	Transcription factor (AHRD V1 **-- D7LLP9_ARALY); contains Interpro domain(s) IPR006578 MADF domain	plastid	2	Y	possibly plastid	plastid	11	N	99.9723
Solyc01g089840.2.1	Glutamyl-tRNA reductase (AHRD V1 ***- Q9ZPK4_SOYBN); contains Interpro domain(s) IPR015895 Tetrapyrrole biosynthesis, glutamyl-tRNA reductase, N-terminal	plastid	3	-	plastid	plastid	6	plastid	100
Solyc01g089870.2.1	Pentatricopeptide repeat-containing protein (AHRD V1 ***- D7KP29_ARALY); contains Interpro domain(s) IPR002885 Pentatricopeptide repeat	plastid	4	Y	none	plastid	2	C	89.5145
Solyc01g089890.2.1	Unknown Protein (AHRD V1); contains Interpro domain(s) IPR004895 Prenylated rab acceptor PRA1	M	5	Y	plastid	not plastid	0	P	38.2755
Solyc01g089930.1.1	Riboflavin biosynthesis protein RibD (AHRD V1 *--- B7KDE3_CYAP7); contains Interpro domain(s) IPR002734 Bacterial bifunctional deaminase-reductase, C-terminal	plastid	3	Y	none	plastid	10	plastid	99.0283
Solyc01g090140.1.1	Naringenin,2-oxoglutarate 3-dioxygenase (AHRD V1 *--* FL3H_ARATH); contains Interpro domain(s) IPR005123 Oxoglutarate and iron-dependent oxygenase	plastid	5	-	none	plastid	7	C	99.3486
Solyc01g090200.2.1	Glycyl-tRNA synthetase beta subunit (AHRD V1 ***- D2PQC6_KRIFD); contains Interpro domain(s) IPR002311 Glycyl-tRNA synthetase, class IIc, beta subunit, N-terminal	plastid	2	Y	possibly plastid	plastid	6	G	66.2223
Solyc01g090230.2.1	GRAM domain containing protein (AHRD V1 *-*- B4FWB9_MAIZE); contains Interpro domain(s) IPR004182 GRAM	plastid	1	Y	plastid	plastid	4	plastid	62.1413
Solyc01g090440.2.1	Unknown Protein (AHRD V1)	-	3	Y	none	not plastid	0	N	51.1042
Solyc01g090480.2.1	Nucleic acid binding protein (AHRD V1 **** B6UDK8_MAIZE); contains Interpro domain(s) IPR018111 K Homology, type 1, subgroup	plastid	2	Y	none	plastid	3	N	97.6959
Solyc01g090560.2.1	Ethylene-responsive transcription factor 4 (AHRD V1 *-*- ERF78_ARATH); contains Interpro domain(s) IPR001471 Pathogenesis-related transcriptional factor and ERF, DNA-binding	plastid	1	Y	none	not plastid	0	N	99.9996
Solyc01g090570.1.1	Unknown Protein (AHRD V1)	plastid	1	Y	plastid	plastid	9	V	96.8923
Solyc01g090590.2.1	Os11g0109966 protein (Fragment) (AHRD V1 *-*- C7J8E6_ORYSJ)	-	5	Y	none	plastid	4	N	42.2637
Solyc01g090660.2.1	Carotenoid cleavage dioxygenase 7	plastid	4	Y	plastid	plastid	5	P	42.1688
Solyc01g090670.2.1	Nuclear pore glycoprotein p62 (AHRD V1 *--- C0HBQ2_SALSA); contains Interpro domain(s) IPR007758 Nucleoporin, Nsp1-like, C-terminal	plastid	1	Y	plastid	plastid	3	N	98.3138
Solyc01g090680.2.1	Genomic DNA chromosome 5 TAC clone K11J9 (AHRD V1 *-*- Q9FKH0_ARATH)	plastid	4	Y	plastid	plastid	7	plastid	72.5824
Solyc01g090690.2.1	Elongation factor G (AHRD V1 ***- B0SNI8_LEPBP); contains Interpro domain(s) IPR004540 Translation elongation factor EFG/EF2	M	5	Y	M	plastid	10	M	73.3094
Solyc01g090700.2.1	Enoyl-CoA-hydratase (AHRD V1 ***- Q9SE41_AVIMR); contains Interpro domain(s) IPR001753 Crotonase, core	M	5	Y	M	plastid	6	M	96.6724
Solyc01g090770.2.1	Unknown Protein (AHRD V1); contains Interpro domain(s) IPR016803 Uncharacterised conserved protein Uplastid022280	plastid	4	-	none	plastid	1	N	69.4862
Solyc01g090780.2.1	Ccr4-Not transcription complex subunit (AHRD V1 *--* C5G9N0_AJEDR); contains Interpro domain(s) IPR007196 CCR4-Not complex component, Not1	-	5	-	possibly plastid	not plastid	0	plastid	80.9728
Solyc01g090810.2.1	Expansin protein (AHRD V1 ***- Q14F61_WHEAT); contains Interpro domain(s) IPR007112 Expansin 45, endoglucanase-like	S	1	Y	ER	plastid	14	EX	99.1545
Solyc01g090860.2.1	Poly(A) RNA polymerase protein 1 (AHRD V1 *--- TRF5_YEAST); contains Interpro domain(s) IPR002934 Nucleotidyltransferase	plastid	2	Y	none	plastid	8	N	69.7426
Solyc01g090870.1.1	ATOFP17/OFP17 (AHRD V1 ***- D7LBN3_ARALY)	M	4	Y	M	plastid	7	M	58.6149
Solyc01g090880.2.1	Holliday junction resolvase (AHRD V1 ***- B6TEN1_MAIZE); contains Interpro domain(s) IPR005227 Resolvase, holliday junction-type, YqgF-like	plastid	3	Y	plastid	plastid	11	M	96.0878
Solyc01g090900.2.1	Unknown Protein (AHRD V1)	M	4	Y	plastid	plastid	11	PM	88.4847
Solyc01g090940.2.1	Phosphatidate cytidylyltransferase (AHRD V1 **** B9RD70_RICCO); contains Interpro domain(s) IPR000374 Phosphatidate cytidylyltransferase	plastid	1	Y	possibly plastid	not plastid	0	plastid	81.9695
Solyc01g091010.2.1	YABBY-like transcription factor CRABS CLAW-like protein (AHRD V1 **-* Q6SRZ7_ANTMA); contains Interpro domain(s) IPR006780 YABBY protein	-	4	Y	none	not plastid	0	N	78.5286
Solyc01g091070.2.1	Methionine aminopeptidase (AHRD V1 ***- B9RD92_RICCO); contains Interpro domain(s) IPR002467 Peptidase M24A, methionine aminopeptidase, subfamily 1	-	5	-	possibly plastid	plastid	3	C	63.384
Solyc01g091190.2.1	3-phosphoshikimate 1-carboxyvinyltransferase (AHRD V1 ***- Q30CZ8_FAGSY); contains Interpro domain(s) IPR001986 3-phosphoshikimate 1-carboxyvinyltransferase, core	plastid	1	Y	plastid	plastid	13	plastid	99.9999
Solyc01g091200.2.1	NAD dependent epimerase/dehydratase family protein expressed (AHRD V1 ***- Q2MJA7_ORYSJ); contains Interpro domain(s) IPR016040 NAD(P)-binding domain	-	1	Y	possibly plastid	not plastid	0	G	99.9754
Solyc01g091210.2.1	tRNA 2&apos-phosphotransferase (AHRD V1 ***- B6K5D9_SCHJY); contains Interpro domain(s) IPR002745 Phosphotransferase KptA/Tpt1	M	4	Y	M	plastid	15	EX	45.5126
Solyc01g091230.2.1	Receptor like kinase, RLK	S	2	Y	ER	not plastid	0	PM	54.9617
Solyc01g091330.2.1	Maleylacetoacetate isomerase/glutathione S-transferase (AHRD V1 ***- C9Q4X6_9VIBR); contains Interpro domain(s) IPR005955 Maleylacetoacetate isomerase	M	5	Y	possibly M	plastid	13	C	98.9622
Solyc01g091360.2.1	Homology to unknown gene (AHRD V1 ***- Q00VP3_OSTTA); contains Interpro domain(s) IPR010865 Protein of unknown function DUF1499	plastid	4	Y	plastid	plastid	4	C	47.3701
Solyc01g091400.2.1	LOB domain protein 31 (AHRD V1 *-*- D7M5R7_ARALY); contains Interpro domain(s) IPR004883 Lateral organ boundaries, LOB	-	5	-	none	plastid	8	plastid	62.086
Solyc01g091420.1.1	LOB domain protein 30 (AHRD V1 ***- D7M5R6_ARALY); contains Interpro domain(s) IPR004883 Lateral organ boundaries, LOB	plastid	4	Y	none	plastid	9	N	76.5013
Solyc01g091450.2.1	Pentatricopeptide repeat-containing protein (AHRD V1 ***- D7KP55_ARALY); contains Interpro domain(s) IPR002885 Pentatricopeptide repeat	plastid	4	Y	plastid	plastid	12	C	85.8675
Solyc01g091480.2.1	Kinesin (AHRD V1 *-*- D2VUW4_NAEGR); contains Interpro domain(s) IPR001752 Kinesin, motor region	plastid	4	Y	possibly plastid	plastid	12	C	99.8731
Solyc01g091500.2.1	Forkhead-associated domain-containing protein (AHRD V1 ***- D7LCJ5_ARALY); contains Interpro domain(s) IPR000253 Forkhead-associated	plastid	2	Y	none	not plastid	0	N	99.5318
Solyc01g091580.2.1	Signal recognition particle-docking protein FtsY (AHRD V1 ***- A7H885_ANADF); contains Interpro domain(s) IPR004390 Cell division transporter substrate-binding protein FtsY	plastid	4	Y	plastid	plastid	9	C	94.3109
Solyc01g091590.2.1	SRC2 protein (AHRD V1 ***- A7XAJ8_9CONI); contains Interpro domain(s) IPR000008 C2 calcium-dependent membrane targeting	plastid	5	-	none	plastid	3	C	83.8157
Solyc01g091600.2.1	RING finger family protein (AHRD V1 *-*- D6RU92_SILLA); contains Interpro domain(s) IPR018957 Zinc finger, C3HC4 RING-type	plastid	3	Y	none	not plastid	0	N	89.1146
Solyc01g091610.1.1	Pentatricopeptide repeat-containing protein (AHRD V1 ***- D7LS65_ARALY); contains Interpro domain(s) IPR002885 Pentatricopeptide repeat	M	5	-	possibly plastid	not plastid	0	C	92.3547
Solyc01g091630.2.1	Homeobox-leucine zipper protein ATHB-9 (AHRD V1 *-*- ATBH9_ARATH); contains Interpro domain(s) IPR002913 Lipid-binding START	-	5	Y	none	not plastid	0	N	99.7707
Solyc01g091660.2.1	Alcohol dehydrogenase (Fragment) (AHRD V1 ***- Q6R4X9_ZEAMM); contains Interpro domain(s) IPR002347 Glucose/ribitol dehydrogenase	-	5	-	none	plastid	2	plastid	61.2852
Solyc01g091690.2.1	Dehydration-responsive family protein (AHRD V1 **-- D7M5L0_ARALY); contains Interpro domain(s) IPR004159 Protein of unknown function DUF248, methyltransferase putative	-	5	-	possibly plastid	plastid	3	G	81.7455
Solyc01g091760.2.1	Ethylene responsive transcription factor 2a (AHRD V1 *-*- C0J9I7_9ROSA); contains Interpro domain(s) IPR001471 Pathogenesis-related transcriptional factor and ERF, DNA-binding	plastid	4	Y	none	plastid	1	N	99.9997
Solyc01g091780.2.1	Fructosamine kinase family protein (AHRD V1 ***- D7LS54_ARALY); contains Interpro domain(s) IPR016477 Fructosamine/Ketosamine-3-kinase	plastid	3	Y	plastid	plastid	1	plastid	99.0062
Solyc01g091800.2.1	Ribosomal RNA small subunit methyltransferase A (AHRD V1 ***- D6YS21_WADCW); contains Interpro domain(s) IPR011530 rRNA adenine dimethylase	-	5	-	none	plastid	2	plastid	50.3322
Solyc01g091830.2.1	Unknown Protein (AHRD V1)	-	4	-	plastid	plastid	3	N	53.5391
Solyc01g091910.2.1	Phospholipase D (AHRD V1 **** Q9XGT0_GOSHI); contains Interpro domain(s) IPR011402 Phospholipase D, plant	plastid	3	Y	none	plastid	11	C	93.7335
Solyc01g091940.2.1	CRS2-associated factor 1, chloroplastic (AHRD V1 ***- CAF1P_ARATH); contains Interpro domain(s) IPR001890 RNA-binding, CRM domain	M	2	Y	M	plastid	9	M	94.3113
Solyc01g094020.2.1	Receptor kinase-like protein (AHRD V1 *-*- Q9STJ8_ARATH); contains Interpro domain(s) IPR002290 Serine/threonine protein kinase	-	4	Y	none	plastid	12	PM	53.2596
Solyc01g094040.2.1	Plastocyanin-like domain containing protein expressed (AHRD V1 **-- Q2QRP3_ORYSJ); contains Interpro domain(s) IPR003245 Plastocyanin-like	S	1	Y	ER	plastid	5	EX	61.815
Solyc01g094120.2.1	Cytochrome P450	S	1	-	possibly plastid	plastid	9	G	95.0657
Solyc01g094280.2.1	FolD bifunctional protein (AHRD V1 ***- B6TJF9_MAIZE); contains Interpro domain(s) IPR000672 Tetrahydrofolate dehydrogenase/cyclohydrolase	plastid	1	Y	plastid	plastid	9	M	98.5552
Solyc01g094290.2.1	Glutathione-regulated potassium-efflux system protein (AHRD V1 *-*- B3CM92_WOLPP); contains Interpro domain(s) IPR004771 K+/H+ exchanger	-	5	-	possibly plastid	not plastid	0	PM	88.9692
Solyc01g094300.1.1	PRP31 pre-mRNA processing factor 31 homolog (Predicted) (AHRD V1 *--- B1MTX8_CALMO); contains Interpro domain(s) IPR002687 Pre-mRNA processing ribonucleoprotein, binding region	S	1	-	possibly plastid	plastid	5	EX	82.1524
Solyc01g094340.2.1	Acetyl-coenzyme A carboxylase carboxyl transferase subunit alpha (AHRD V1 *-*- A0YRC5_LYNSP); contains Interpro domain(s) IPR001095 Acetyl-CoA carboxylase, alpha subunit	plastid	4	-	none	not plastid	0	C	71.9666
Solyc01g094370.2.1	Remorin 2 (AHRD V1 ***- Q9XEX9_SOLLC); contains Interpro domain(s) IPR005516 Remorin, C-terminal region	plastid	5	-	none	not plastid	0	N	98.656
Solyc01g094380.2.1	Glycosyltransferase CAZy family GT90 (Fragment) (AHRD V1 **-- D8SQN9_SELML); contains Interpro domain(s) IPR008539 Protein of unknown function DUF821, CAP10-like	-	1	Y	none	not plastid	0	G	97.6591
Solyc01g094460.2.1	AT-hook motif nuclear localized protein 1 (AHRD V1 ***- O04696_PEA); contains Interpro domain(s) IPR005175 Protein of unknown function DUF296	-	5	Y	none	not plastid	0	N	96.597
Solyc01g094500.2.1	Riboflavin biosynthesis protein ribD (AHRD V1 ***- B6TRH4_MAIZE); contains Interpro domain(s) IPR004794 Riboflavin biosynthesis protein RibD	plastid	4	Y	none	plastid	11	plastid	99.982
Solyc01g094600.2.1	Pentatricopeptide repeat-containing protein (AHRD V1 ***- D7MBT1_ARALY); contains Interpro domain(s) IPR002885 Pentatricopeptide repeat	S	4	Y	ER	plastid	6	ER	62.0617
Solyc01g094620.2.1	Mediator of RNA polymerase II transcription subunit 12 (AHRD V1 *--- B2G3S6_ZYGRO); contains Interpro domain(s) IPR019035 Mediator complex, subunit Med12	plastid	3	Y	none	plastid	4	plastid	39.8834
Solyc01g094630.2.1	Unknown Protein (AHRD V1)	plastid	4	-	none	not plastid	0	N	99.8309
Solyc01g094650.2.1	Protein PAIR1 (AHRD V1 *-*- PAIR1_ORYSJ)	plastid	2	Y	none	plastid	6	N	97.1686
Solyc01g094700.2.1	Glycerol-3-phosphate acyltransferase 4 (AHRD V1 **** D7KQ54_ARALY); contains Interpro domain(s) IPR002123 Phospholipid/glycerol acyltransferase	-	3	Y	none	not plastid	0	PM	82.422
Solyc01g094800.2.1	Chromodomain-helicase-DNA-binding protein 1 (AHRD V1 *--* CHD1_DROME); contains Interpro domain(s) IPR000330 SNF2-related	plastid	5	Y	none	plastid	3	N	99.9996
Solyc01g094840.2.1	RING finger protein 13 (AHRD V1 *-*- RNF13_RAT); contains Interpro domain(s) IPR018957 Zinc finger, C3HC4 RING-type	M	5	-	none	not plastid	0	plastid	42.6012
Solyc01g094880.2.1	Protein RIC1 homolog (AHRD V1 **-- RIC1_MOUSE); contains Interpro domain(s) IPR009771 Protein of unknown function DUF1339	-	5	-	possibly plastid	plastid	3	PM	45.335
Solyc01g094900.1.1	Ferric reductase (AHRD V1 ***- B5KGU9_MALXI); contains Interpro domain(s) IPR013130 Ferric reductase-like transmembrane component, N-terminal	-	4	-	possibly plastid	plastid	4	PM	99.8801
Solyc01g094940.2.1	Receptor-like protein kinase (AHRD V1 ***- Q9LYS5_ARATH); contains Interpro domain(s) IPR002290 Serine/threonine protein kinase	-	2	-	possibly plastid	plastid	4	PM	99.377
Solyc01g095000.2.1	Homology to unknown gene (AHRD V1 *-*- Q019E6_OSTTA)	plastid	1	Y	possibly plastid	plastid	8	C	52.5639
Solyc01g095010.2.1	Diacylglycerol kinase catalytic region (AHRD V1 **** D0LGX1_HALO1); contains Interpro domain(s) IPR001206 Diacylglycerol kinase, catalytic region	plastid	4	Y	possibly M	plastid	10	plastid	71.6489
Solyc01g095100.2.1	WRKY transcription factor 23 (AHRD V1 ***- C9DI12_9ROSI); contains Interpro domain(s) IPR003657 DNA-binding WRKY	-	3	Y	none	not plastid	0	N	99.9844
Solyc01g095120.2.1	Alpha/beta hydrolase fold (AHRD V1 **-- A4FFA2_SACEN); contains Interpro domain(s) IPR000073 Alpha/beta hydrolase fold-1	M	4	Y	possibly M	plastid	8	M	92.8415
Solyc01g095130.2.1	Transcription factor (AHRD V1 ***- O04238_VICFA)	-	3	-	none	plastid	5	plastid	71.3626
Solyc01g095160.2.1	Pentatricopeptide repeat-containing protein (AHRD V1 ***- D7MB20_ARALY); contains Interpro domain(s) IPR002885 Pentatricopeptide repeat	M	4	Y	none	plastid	6	C	77.9049
Solyc01g095180.2.1	RING finger protein 38 (AHRD V1 *-*- RNF38_HUMAN); contains Interpro domain(s) IPR018957 Zinc finger, C3HC4 RING-type	plastid	2	Y	plastid	plastid	13	plastid	58.9448
Solyc01g095230.2.1	Programmed cell death 7 (AHRD V1 *-*- Q567N3_DANRE)	plastid	3	Y	none	plastid	6	N	91.9383
Solyc01g095270.2.1	SOUL heme-binding protein-like (AHRD V1 *-*- D7G9H5_ECTSI); contains Interpro domain(s) IPR018790 Protein of unknown function DUF2358	plastid	2	Y	plastid	plastid	18	plastid	92.3887
Solyc01g095290.2.1	1 3-alpha-D-xylosyltransferase (AHRD V1 **-* Q9ZSJ2_ARATH); contains Interpro domain(s) IPR003388 Reticulon	plastid	5	Y	none	plastid	6	PM	70.4276
Solyc01g095300.2.1	Glycosyl transferase group 1 (AHRD V1 *-** D2LJY9_RHOVA); contains Interpro domain(s) IPR001296 Glycosyl transferase, group 1	-	5	Y	none	not plastid	0	N	57.2259
Solyc01g095330.2.1	Unknown Protein (AHRD V1)	S	2	Y	none	plastid	6	EX	95.0966
Solyc01g095380.1.1	Unknown Protein (AHRD V1)	-	2	-	none	plastid	1	plastid	79.7782
Solyc01g095390.2.1	SKIP interacting protein 7 (Fragment) (AHRD V1 *-*- B8Q893_ORYSI)	plastid	3	Y	none	plastid	4	N	99.4904
Solyc01g095430.2.1	Threonine endopeptidase (AHRD V1 **-- B6TCN7_MAIZE)	plastid	1	Y	plastid	plastid	14	plastid	99.7649
Solyc01g095510.2.1	Mitochondrial carrier family (AHRD V1 ***- C1E2Y0_9CHLO); contains Interpro domain(s) IPR002113 Adenine nucleotide translocator 1	plastid	5	Y	none	plastid	12	plastid	99.3211
Solyc01g095620.2.1	UDP-glucosyltransferase (AHRD V1 **-* B8QI32_9MAGN); contains Interpro domain(s) IPR002213 UDP-glucuronosyl/UDP-glucosyltransferase	-	4	-	possibly plastid	plastid	8	G	99.7543
Solyc01g095650.2.1	Histone H3 (AHRD V1 ***- B7XEI9_NICTO); contains Interpro domain(s) IPR000164 Histone H3	plastid	4	Y	none	plastid	2	N	99.9177
Solyc01g095670.2.1	Rhodanese-related sulfurtransferase (AHRD V1 *--- A0NUG1_9RHOB); contains Interpro domain(s) IPR001763 Rhodanese-like	plastid	4	-	none	plastid	10	C	61.4904
Solyc01g095680.2.1	Unknown Protein (AHRD V1)	plastid	5	Y	plastid	plastid	11	plastid	45.4198
Solyc01g095690.2.1	Pentatricopeptide repeat-containing protein (AHRD V1 ***- D7KIA6_ARALY); contains Interpro domain(s) IPR002885 Pentatricopeptide repeat	plastid	3	Y	possibly plastid	plastid	6	C	99.3482
Solyc01g095720.2.1	Lipase (AHRD V1 *-*- C1FIH0_9CHLO); contains Interpro domain(s) IPR002921 Lipase, class 3	plastid	3	-	possibly plastid	plastid	7	N	87.5471
Solyc01g095740.2.1	ATP-dependent RNA helicase DBP4 (AHRD V1 *-** C1GZM0_PARBA); contains Interpro domain(s) IPR011545 DNA/RNA helicase, DEAD/DEAH box type, N-terminal	M	5	Y	M	plastid	20	C	82.0253
Solyc01g095800.2.1	F-box/LRR-repeat protein (AHRD V1 *-*- C0S347_PARBP); contains Interpro domain(s) IPR006553 Leucine-rich repeat, cysteine-containing subtype	plastid	2	Y	none	plastid	2	C	53.4379
Solyc01g095810.2.1	Ring H2 finger protein (AHRD V1 *-*- D9ZHD8_HYPPE); contains Interpro domain(s) IPR001841 Zinc finger, RING-type	S	1	Y	ER	plastid	5	PM	99.8538
Solyc01g095980.2.1	Acid phosphatase/vanadium-dependent haloperoxidase related (AHRD V1 *--- A4XKK1_CALS8); contains Interpro domain(s) IPR003832 Acid phosphatase/vanadium-dependent haloperoxidase related	plastid	3	Y	plastid	plastid	6	PM	94.2016
Solyc01g096000.2.1	Harpin-induced protein (AHRD V1 ***- B6SQ86_MAIZE); contains Interpro domain(s) IPR010847 Harpin-induced 1	-	5	Y	none	plastid	7	PM	93.4087
Solyc01g096010.2.1	Unknown Protein (AHRD V1)	plastid	1	Y	plastid	plastid	20	N	76.8063
Solyc01g096060.2.1	Nuclear envelope protein that mediates the nuclear export of importin alpha (Srp1p) (AHRD V1 **-* C4R5I2_PIplastidG); contains Interpro domain(s) IPR013713 Exportin, Cse1-like	plastid	5	-	none	not plastid	0	C	99.9968
Solyc01g096100.2.1	AT2G46550 protein (Fragment) (AHRD V1 ***- B9DHY8_ARATH)	M	4	-	possibly plastid	plastid	5	C	64.2532
Solyc01g096170.2.1	Serine/threonine protein kinase (AHRD V1 *-** D0NNA3_PHYIN); contains Interpro domain(s) IPR002290 Serine/threonine protein kinase	plastid	4	Y	none	not plastid	0	plastid	71.9864
Solyc01g096240.2.1	Homology to unknown gene (AHRD V1 ***- Q01FV7_OSTTA)	plastid	5	-	possibly M	not plastid	0	PM	99.727
Solyc01g096250.2.1	Unknown Protein (AHRD V1)	M	5	Y	possibly M	not plastid	0	N	78.1563
Solyc01g096300.2.1	Cysteine-type endopeptidase/ ubiquitin thiolesterase (AHRD V1 **-- B6TDL6_MAIZE)	S	3	Y	none	plastid	6	PM	99.5236
Solyc01g096320.2.1	Homeobox leucine zipper protein (AHRD V1 ***- Q9XH73_PRUAR); contains Interpro domain(s) IPR001356 Homeobox	plastid	3	Y	none	not plastid	0	N	100
Solyc01g096330.2.1	Unknown Protein (AHRD V1)	-	4	-	possibly plastid	plastid	4	EX	57.3914
Solyc01g096400.2.1	Unknown Protein (AHRD V1)	plastid	5	Y	plastid	plastid	15	plastid	40.4177
Solyc01g096480.2.1	Thioredoxin protein (AHRD V1 ***- Q6JE37_NICBE); contains Interpro domain(s) IPR013766 Thioredoxin domain	plastid	2	Y	none	plastid	12	plastid	99.9741
Solyc01g096500.2.1	D-erythro-sphingosine kinase (AHRD V1 *-** D7MES6_ARALY); contains Interpro domain(s) IPR001206 Diacylglycerol kinase, catalytic region	plastid	4	Y	none	plastid	12	M	50.9877
Solyc01g096510.2.1	Sigma factor binding protein 1 (AHRD V1 *-*- D1MWZ4_CITLA); contains Interpro domain(s) IPR008889 VQ	-	3	Y	none	plastid	3	N	99.2658
Solyc01g096610.2.1	UPF0468 protein C16orf80 homolog (AHRD V1 ***- C1BNI4_9MAXI); contains Interpro domain(s) IPR007714 Protein of unknown function DUF667	S	3	Y	possibly ER	plastid	10	EX	65.069
Solyc01g096660.2.1	Genomic DNA chromosome 5 P1 clone MOJ9 (AHRD V1 ***- Q9FL44_ARATH)	plastid	2	Y	plastid	plastid	13	plastid	97.5337
Solyc01g096860.1.1	AP2-like ethylene-responsive transcription factor At1g16060 (AHRD V1 *-*- AP2L1_ARATH); contains Interpro domain(s) IPR001471 Pathogenesis-related transcriptional factor and ERF, DNA-binding	plastid	2	-	none	plastid	3	N	100
Solyc01g096870.2.1	Prolyl-tRNA synthetase (AHRD V1 **** Q7XZD2_RAPSA); contains Interpro domain(s) IPR004499 Prolyl-tRNA synthetase, class IIa, prokaryotic-type	plastid	4	Y	plastid	plastid	14	C	44.2096
Solyc01g096880.2.1	Nitrate transporter (AHRD V1 **** Q9SZY4_ARATH); contains Interpro domain(s) IPR000109 TGF-beta receptor, type I/II extracellular region	-	3	-	possibly plastid	not plastid	0	PM	99.408
Solyc01g096890.2.1	Genomic DNA chromosome 5 P1 clone MXI22 (AHRD V1 *-*- Q9FK37_ARATH)	plastid	4	Y	none	plastid	9	N	96.565
Solyc01g096900.2.1	DNA gyrase subunit A family protein (AHRD V1 ***- D7L923_ARALY); contains Interpro domain(s) IPR005743 DNA gyrase, subunit A	plastid	4	Y	possibly plastid	plastid	13	N	29.4371
Solyc01g096910.2.1	Vacuolar protein sorting 36 family protein (AHRD V1 ***- D7LY74_ARALY); contains Interpro domain(s) IPR007286 EAP30	-	4	-	possibly plastid	plastid	13	P	36.2636
Solyc01g096920.2.1	Polyadenylation factor I complex subunit Yth1 (plastidSF subunit) (ISS) (AHRD V1 *-*- Q01E48_OSTTA); contains Interpro domain(s) IPR019496 Nuclear fragile X mental retardation-interacting protein 1, conserved region	M	3	Y	none	plastid	3	N	99.1379
Solyc01g096930.2.1	Phospholipid-transporting ATPase (AHRD V1 **** B6JZB6_SCHJY); contains Interpro domain(s) IPR006539 ATPase, P-type, phospholipid-translocating, flippase	plastid	2	Y	none	not plastid	0	P	72.9589
Solyc01g097050.2.1	Nucleic acid binding protein (AHRD V1 *-*- D7L2W2_ARALY); contains Interpro domain(s) IPR014560 Uncharacterised conserved protein Uplastid030333, DNA/RNA-binding Alba-related	plastid	2	Y	plastid	plastid	10	plastid	77.8928
Solyc01g097070.2.1	DNA topoisomerase (AHRD V1 *--- B4Q9Z3_DROSI); contains Interpro domain(s) IPR010666 Zinc finger, GRF-type	-	3	Y	none	plastid	1	N	91.8083
Solyc01g097110.1.1	Fanconi anemia group D2 protein (AHRD V1 *-*- FACD2_HUMAN)	-	5	Y	none	plastid	4	M	47.781
Solyc01g097120.2.1	Os02g0200800 protein (Fragment) (AHRD V1 *-*- Q0E303_ORYSJ); contains Interpro domain(s) IPR009675 Targeting for Xklp2	plastid	3	Y	none	not plastid	0	N	99.641
Solyc01g097130.2.1	Pentatricopeptide repeat-containing protein (AHRD V1 ***- D7LT70_ARALY); contains Interpro domain(s) IPR002885 Pentatricopeptide repeat	-	2	-	possibly plastid	plastid	3	C	99.7506
Solyc01g097140.2.1	Dual-specificity tyrosine-phosphatase CDC25 (AHRD V1 **** Q10SX6_ORYSJ); contains Interpro domain(s) IPR001763 Rhodanese-like	M	4	-	possibly plastid	plastid	12	C	94.55
Solyc01g097160.2.1	FAD dependent oxidoreductase (AHRD V1 ***- B7G7N7_PHATR); contains Interpro domain(s) IPR006076 FAD dependent oxidoreductase	plastid	1	Y	none	plastid	12	plastid	97.5445
Solyc01g097170.2.1	Unknown Protein (AHRD V1)	plastid	1	Y	none	plastid	4	N	99.2035
Solyc01g097180.2.1	Os11g0282300 protein (Fragment) (AHRD V1 *-*- Q0ITA9_ORYSJ); contains Interpro domain(s) IPR012881 Protein of unknown function DUF1685	plastid	5	-	none	not plastid	0	N	98.526
Solyc01g097230.2.1	PRA1 family protein E (AHRD V1 *-*- PRA1E_ARATH); contains Interpro domain(s) IPR004895 Prenylated rab acceptor PRA1	plastid	1	Y	plastid	plastid	10	plastid	92.2005
Solyc01g097270.2.1	Chitinase (Fragment) (AHRD V1 *--- Q38777_ALLSA); contains Interpro domain(s) IPR000726 Glycoside hydrolase, family 19, catalytic IPR001153 Barwin	S	1	Y	ER	plastid	13	EX	97.4055
Solyc01g097280.2.1	Chitinase (Fragment) (AHRD V1 *--- B8QVF0_ZEAMP); contains Interpro domain(s) IPR000726 Glycoside hydrolase, family 19, catalytic IPR001153 Barwin	S	1	Y	ER	plastid	9	EX	99.9202
Solyc01g097310.2.1	Sec-independent protein translocase protein tatA/E homolog (AHRD V1 *-*- D7DW94_NOSA0); contains Interpro domain(s) IPR006312 Twin-arginine translocation protein TatA/E	plastid	1	Y	plastid	plastid	13	plastid	90.421
Solyc01g097330.2.1	Opaque 2 (Fragment) (AHRD V1 *--- Q84YB2_ZEAPE); contains Interpro domain(s) IPR011616 bZIP transcription factor, bZIP-1	-	2	Y	none	not plastid	0	N	99.9981
Solyc01g097460.2.1	Ribose-5-phosphate isomerase (AHRD V1 ***- A8IRQ1_CHLRE); contains Interpro domain(s) IPR004788 Ribose 5-phosphate isomerase	plastid	3	Y	plastid	plastid	17	plastid	93.4152
Solyc01g097570.2.1	Unknown Protein (AHRD V1)	S	3	Y	ER	plastid	12	EX	97.1271
Solyc01g097640.2.1	Ribosome biogenesis protein BMS1 homolog (AHRD V1 *--- BMS1_HUMAN); contains Interpro domain(s) IPR007034 Protein of unknown function DUF663	plastid	5	-	none	not plastid	0	N	94.6353
Solyc01g097660.2.1	Pectinesterase inhibitor (AHRD V1 -**- PMEI_ACTDE); contains Interpro domain(s) IPR006501 Pectinesterase inhibitor	S	2	-	ER	plastid	6	EX	60.668
Solyc01g097670.2.1	Pentatricopeptide repeat-containing protein (AHRD V1 ***- D7MHD4_ARALY); contains Interpro domain(s) IPR002885 Pentatricopeptide repeat	plastid	4	-	possibly plastid	plastid	14	C	89.1496
Solyc01g097730.2.1	Pentatricopeptide repeat-containing protein (AHRD V1 ***- D7KN02_ARALY); contains Interpro domain(s) IPR002885 Pentatricopeptide repeat	M	3	Y	none	plastid	12	plastid	93.7867
Solyc01g097810.2.1	Zeta-carotene desaturase	plastid	2	Y	plastid	plastid	12	plastid	99.9999
Solyc01g097860.2.1	Membrane protein (AHRD V1 *-*- A8JG04_CHLRE); contains Interpro domain(s) IPR010903 Protein of unknown function DUF1517	-	5	-	plastid	plastid	7	PM	94.2797
Solyc01g097910.2.1	Rubredoxin family protein (AHRD V1 *-*- D7KP11_ARALY); contains Interpro domain(s) IPR004039 Rubredoxin-type Fe(Cys)4 protein	plastid	2	Y	plastid	plastid	6	plastid	99.5481
Solyc01g097940.1.1	Cysteine synthase (AHRD V1 ***- Q9FSF5_TOBAC); contains Interpro domain(s) IPR001926 Pyridoxal phosphate-dependent enzyme, beta subunit	S	5	-	none	plastid	6	plastid	93.2862
Solyc01g097970.2.1	Deoxyuridine 5&apos-triphosphate nucleotidohydrolase (AHRD V1 ***- C1E7B9_9CHLO); contains Interpro domain(s) IPR008181 DeoxyUTP pyrophosphatase subfamily 1	plastid	3	Y	possibly plastid	plastid	6	M	54.2679
Solyc01g097980.2.1	Kinase family protein (AHRD V1 *-** D7M4D4_ARALY); contains Interpro domain(s) IPR002290 Serine/threonine protein kinase	plastid	1	Y	none	plastid	3	C	99.2091
Solyc01g098030.2.1	Contains similarity to RNA-binding protein from Arabidopsis thaliana gi|2129727 and contains RNA recognition PF|00076 domain (AHRD V1 *-*- Q8LA02_ARATH)	M	4	Y	M	plastid	12	N	99.2533
Solyc01g098040.2.1	Methyltransferase type 12 (AHRD V1 *-*- D5C2M0_NITHN); contains Interpro domain(s) IPR013217 Methyltransferase type 12	S	1	Y	ER	plastid	5	PM	58.6761
Solyc01g098130.2.1	Unknown Protein (AHRD V1)	S	4	-	plastid	plastid	3	EX	95.0647
Solyc01g098150.2.1	Pentatricopeptide repeat-containing protein (AHRD V1 ***- D7MHD4_ARALY); contains Interpro domain(s) IPR002885 Pentatricopeptide repeat	plastid	2	Y	plastid	plastid	11	ER	45.5926
Solyc01g098380.2.1	Dihydrodipicolinate reductase family protein (AHRD V1 **** D7LKV2_ARALY); contains Interpro domain(s) IPR011859 Dihydrodipicolinate reductase, plant	plastid	5	Y	possibly M	plastid	13	V	32.2187
Solyc01g098390.2.1	GID1-like gibberellin receptor (AHRD V1 **-- A7MAQ4_HORVU); contains Interpro domain(s) IPR013094 Alpha/beta hydrolase fold-3	plastid	5	-	none	plastid	3	C	93.3154
Solyc01g098430.2.1	Breast carcinoma amplified sequence 3 (Fragment) (AHRD V1 *--- B1AR77_MOUSE); contains Interpro domain(s) IPR011046 WD40 repeat-like	plastid	1	Y	none	plastid	14	N	84.8993
Solyc01g098450.2.1	Genomic DNA chromosome 3 P1 clone MYF24 (AHRD V1 ***- Q9LS59_ARATH)	plastid	3	Y	none	not plastid	0	N	78.3145
Solyc01g098480.1.1	Pentatricopeptide repeat-containing protein (AHRD V1 ***- D7LKZ8_ARALY); contains Interpro domain(s) IPR002885 Pentatricopeptide repeat	-	3	-	possibly plastid	plastid	10	M	59.8244
Solyc01g098550.2.1	Tryptophan synthase alpha chain (AHRD V1 ***- Q8LA83_ARATH); contains Interpro domain(s) IPR002028 Tryptophan synthase, alpha chain	M	4	Y	plastid	plastid	11	plastid	99.9997
Solyc01g098560.2.1	Glucose transporter 8 (AHRD V1 ***- Q2KKJ3_SOLIN); contains Interpro domain(s) IPR003663 Sugar/inositol transporter	-	1	Y	none	not plastid	0	PM	88.8208
Solyc01g098610.2.1	Glutathione synthetase (AHRD V1 **** Q6F4I7_ZINEL); contains Interpro domain(s) IPR005615 Glutathione synthase, eukaryotic	plastid	2	Y	possibly plastid	plastid	11	plastid	99.9957
Solyc01g098640.2.1	UPF0603 protein At1g54780, chloroplastic (AHRD V1 **-- U603_ARATH); contains Interpro domain(s) IPR007621 Protein of unknown function DUF477	plastid	1	Y	plastid	plastid	7	plastid	99.7165
Solyc01g098710.2.1	Aspartyl protease family protein (AHRD V1 **-- D7LT22_ARALY); contains Interpro domain(s) IPR001461 Peptidase A1	S	3	Y	ER	plastid	3	PM	99.6881
Solyc01g098750.2.1	RING finger protein B (AHRD V1 *--- RNGB_DICDI); contains Interpro domain(s) IPR018957 Zinc finger, C3HC4 RING-type	plastid	4	Y	none	plastid	6	N	67.5864
Solyc01g098850.2.1	Short-chain dehydrogenase/reductase family protein (AHRD V1 ***- D7L3S3_ARALY); contains Interpro domain(s) IPR002347 Glucose/ribitol dehydrogenase	plastid	3	Y	M	plastid	10	plastid	80.0221
Solyc01g098900.2.1	Yip1 domain-containing protein (AHRD V1 **-- D3BM06_POLPA); contains Interpro domain(s) IPR006977 Yip1 domain	plastid	4	Y	none	plastid	2	PM	93.8385
Solyc01g098990.2.1	Os06g0146300 protein (Fragment) (AHRD V1 ***- Q0DEL6_ORYSJ); contains Interpro domain(s) IPR018962 Domain of unknown function DUF1995	plastid	1	Y	plastid	plastid	13	plastid	99.9145
Solyc01g099000.1.1	Pentatricopeptide repeat-containing protein (AHRD V1 ***- D7L3T5_ARALY); contains Interpro domain(s) IPR002885 Pentatricopeptide repeat	plastid	5	Y	none	plastid	10	plastid	44.7188
Solyc01g099110.2.1	Xaa-pro aminopeptidase (AHRD V1 **-- A1DF27_NEOFI); contains Interpro domain(s) IPR000994 Peptidase M24, structural domain	plastid	2	Y	plastid	plastid	14	plastid	92.018
Solyc01g099120.2.1	Protein AUXIN RESPONSE 4 (AHRD V1 ***- AXR4_ARATH)	-	4	Y	none	not plastid	0	C	47.4889
Solyc01g099230.2.1	Zinc finger protein VAR3, chloroplastic (AHRD V1 *--- VAR3_ARATH); contains Interpro domain(s) IPR001876 Zinc finger, RanBP2-type	M	1	Y	M	plastid	12	N	99.9512
Solyc01g099260.2.1	Chaperone protein dnaJ (AHRD V1 *-*- A7J483_9EURY); contains Interpro domain(s) IPR001623 Heat shock protein DnaJ, N-terminal	-	5	Y	possibly plastid	plastid	2	N	66.4817
Solyc01g099280.2.1	5&apos-AMP-activated protein kinase gamma-1 subunit (AHRD V1 **** Q1M178_ONCMY); contains Interpro domain(s) IPR000644 Cystathionine beta-synthase, core	-	4	Y	none	plastid	5	PM	45.3448
Solyc01g099340.2.1	Zinc finger protein (AHRD V1 *--- Q764N7_MALDO); contains Interpro domain(s) IPR007087 Zinc finger, C2H2-type	plastid	5	-	none	not plastid	0	N	99.9997
Solyc01g099350.2.1	Acyl-CoA binding protein 4 acyl-CoA-binding domain 4 (AHRD V1 **-* D7L3U2_ARALY); contains Interpro domain(s) IPR015915 Kelch-type beta propeller	-	4	-	none	plastid	3	plastid	54.1958
Solyc01g099360.2.1	PWWP domain-containing protein (AHRD V1 *-*- D7L3U3_ARALY); contains Interpro domain(s) IPR000313 PWWP	plastid	5	-	none	not plastid	0	N	99.9984
Solyc01g099400.2.1	WD-repeat domain phosphoinositide-interacting protein 3 (AHRD V1 **-- B6SUF7_MAIZE); contains Interpro domain(s) IPR017986 WD40 repeat, region	M	5	Y	possibly ER	plastid	6	G	93.3548
Solyc01g099470.2.1	ATP-dependent DNA helicase Q-like SIM (AHRD V1 *-*- RQSIM_ARATH)	M	3	-	possibly plastid	not plastid	0	N	79.136
Solyc01g099490.1.1	Unknown Protein (AHRD V1)	M	4	-	possibly plastid	not plastid	0	M	68.6715
Solyc01g099690.2.1	ATP-dependent Clp protease proteolytic subunit (AHRD V1 ***- B9RFA9_RICCO); contains Interpro domain(s) IPR001907 Peptidase S14, ClpP	plastid	2	Y	plastid	plastid	9	plastid	99.8697
Solyc01g099700.2.1	Os07g0673000 protein (Fragment) (AHRD V1 ***- Q0D3Q5_ORYSJ)	S	4	Y	ER	plastid	18	G	66.1415
Solyc01g099840.2.1	Auxin-repressed protein (AHRD V1 ***- B4FA62_MAIZE); contains Interpro domain(s) IPR008406 Dormancyauxin associated	-	2	Y	none	not plastid	0	N	56.095
Solyc01g099930.2.1	Pectinesterase (Fragment) (AHRD V1 *-*- D7U9X3_VITVI)	plastid	1	Y	plastid	not plastid	0	N	99.9909
Solyc01g099970.2.1	F-box/LRR-repeat protein 14 (AHRD V1 *-*- B5X325_SALSA); contains Interpro domain(s) IPR006553 Leucine-rich repeat, cysteine-containing subtype	-	3	-	possibly plastid	plastid	2	P	59.4469
Solyc01g099980.2.1	Glycine-rich protein (AHRD V1 *--- D7M9Z2_ARALY); contains Interpro domain(s) IPR009836 Protein of unknown function DUF1399	plastid	5	-	none	plastid	2	C	73.2274
Solyc01g100100.2.1	RING finger protein (AHRD V1 *-*- B8M8P5_TALSN); contains Interpro domain(s) IPR001841 Zinc finger, RING-type	S	2	-	possibly plastid	plastid	12	EX	98.2303
Solyc01g100140.2.1	Protein DEHYDRATION-INDUCED 19 homolog 3 (AHRD V1 **-- DI193_ARATH); contains Interpro domain(s) IPR008598 Drought induced 19	plastid	4	Y	none	plastid	1	N	92.9187
Solyc01g100170.2.1	Soluble NSF Attachment Protein (SNAP) Receptor (SNARE) (AHRD V1 **** D7G2Z0_ECTSI); contains Interpro domain(s) IPR010989 t-SNARE	M	2	Y	M	plastid	5	C	99.768
Solyc01g100180.2.1	DNA polymerase III polC-type (AHRD V1 *-*- D2GFM8_STAAU); contains Interpro domain(s) IPR006055 Exonuclease	M	4	Y	possibly plastid	plastid	10	N	79.5434
Solyc01g100240.2.1	Calmodulin-binding protein (AHRD V1 **** D7L2U6_ARALY); contains Interpro domain(s) IPR012416 Calmodulin binding protein-like	plastid	4	-	none	plastid	7	N	85.0665
Solyc01g100250.2.1	ABC transporter permease protein (AHRD V1 ***- Q08TD1_STIAU); contains Interpro domain(s) IPR003453 Protein of unknown function DUF140	plastid	5	-	none	plastid	14	plastid	99.9624
Solyc01g100280.2.1	ATP-DEPENDENT DNA HELICASE (AHRD V1 *-** Q8SRI7_ENCCU); contains Interpro domain(s) IPR004589 DNA helicase, ATP-dependent, RecQ type	plastid	5	-	none	not plastid	0	N	99.9782
Solyc01g100360.2.1	Dihydrolipoyl dehydrogenase (AHRD V1 ***- B5LAW5_CAPAN); contains Interpro domain(s) IPR006258 Dihydrolipoamide dehydrogenase	plastid	1	Y	plastid	plastid	12	M	96.2899
Solyc01g100400.2.1	Pseudouridine synthase family protein (AHRD V1 ***- D7KAZ8_ARALY); contains Interpro domain(s) IPR006145 Pseudouridine synthase, RsuA and RluB/C/D/E/F	plastid	2	Y	none	plastid	12	EX	46.1074
Solyc01g100410.2.1	Iron-sulfur cluster insertion protein ErpA (AHRD V1 ***- C8Q1G7_9GAMM); contains Interpro domain(s) IPR016092 FeS cluster insertion	plastid	3	Y	M	plastid	14	M	99.1171
Solyc01g100420.2.1	Peptide chain release factor 2 (AHRD V1 ***- B6SY98_MAIZE); contains Interpro domain(s) IPR004374 Peptide chain release factor 2	plastid	4	Y	M	plastid	11	C	97.3663
Solyc01g100460.2.1	BZIP transcription factor (AHRD V1 **** C0LQL1_9CARY); contains Interpro domain(s) IPR011616 bZIP transcription factor, bZIP-1	plastid	5	-	none	not plastid	0	N	100
Solyc01g100520.2.1	ATP-dependent Clp protease proteolytic subunit (AHRD V1 ***- Q93YH0_SOLLC); contains Interpro domain(s) IPR018215 Peptidase S14, ClpP, active site	plastid	3	Y	plastid	plastid	14	plastid	99.9895
Solyc01g100540.2.1	PAPA-1-like conserved region family protein expressed (AHRD V1 *-*- Q2QNL8_ORYSJ); contains Interpro domain(s) IPR006880 PAPA-1-like conserved region	M	5	-	possibly plastid	not plastid	0	N	91.3006
Solyc01g100610.2.1	Solute carrier family 40 member 1 (AHRD V1 **-- S40A1_DANRE); contains Interpro domain(s) IPR016196 Major facilitator superfamily, general substrate transporter	plastid	3	Y	plastid	plastid	14	plastid	99.1228
Solyc01g100650.2.1	NHL repeat containing 2 (AHRD V1 *--- B2RR26_MOUSE); contains Interpro domain(s) IPR011042 Six-bladed beta-propeller, TolB-like	M	3	Y	possibly M	plastid	11	ER	87.7707
Solyc01g100660.2.1	Transcription factor (AHRD V1 ***- D7L4N5_ARALY)	plastid	5	-	none	not plastid	0	N	99.2839
Solyc01g100680.1.1	3&apos-5&apos exonuclease (AHRD V1 ***- B0WTA6_CULQU); contains Interpro domain(s) IPR002562 3'-5' exonuclease	-	2	Y	none	plastid	9	plastid	96.4522
Solyc01g100700.2.1	Unknown Protein (AHRD V1); contains Interpro domain(s) IPR019083 IGR protein motif	M	1	Y	M	plastid	6	M	94.7131
Solyc01g100710.2.1	Unknown Protein (AHRD V1)	M	3	Y	none	plastid	3	plastid	51.6369
Solyc01g100810.2.1	Neutral invertase (AHRD V1 ***- A7LH71_VITVI); contains Interpro domain(s) IPR006937 Plant neutral invertase	plastid	5	-	none	plastid	10	G	76.2977
Solyc01g100840.2.1	Trafficking protein particle complex subunit 4 (AHRD V1 ***- B6U8Z1_MAIZE); contains Interpro domain(s) IPR007233 Sybindin-like protein	-	4	-	possibly plastid	plastid	2	EX	96.981
Solyc01g100930.2.1	GDSL esterase/lipase At1g09390 (AHRD V1 ***- GDL2_ARATH); contains Interpro domain(s) IPR001087 Lipase, GDSL	S	1	Y	possibly ER	plastid	9	PM	57.2598
Solyc01g100960.2.1	Glucose-6-phosphate 1-dehydrogenase (AHRD V1 ***- B9RFN8_RICCO); contains Interpro domain(s) IPR001282 Glucose-6-phosphate dehydrogenase	plastid	2	Y	plastid	plastid	19	plastid	99.8868
Solyc01g101070.2.1	ABC transporter G family member 37 (AHRD V1 ***- AB37G_ARATH); contains Interpro domain(s) IPR013525 ABC-2 type transporter	plastid	4	-	none	not plastid	0	P	78.1302
Solyc01g101140.2.1	LOC100005105 protein (Fragment) (AHRD V1 *-*- A4QNR9_DANRE); contains Interpro domain(s) IPR007491 Protein of unknown function DUF537	-	3	-	none	not plastid	0	plastid	70.8105
Solyc01g102300.2.1	BHLH transcription factor (AHRD V1 *-** B6TXR4_MAIZE); contains Interpro domain(s) IPR011598 Helix-loop-helix DNA-binding	plastid	5	-	none	not plastid	0	N	99.9999
Solyc01g102360.1.1	Peptide transporter-like protein (AHRD V1 **-* Q9LSE8_ARATH); contains Interpro domain(s) IPR000109 TGF-beta receptor, type I/II extracellular region	-	2	Y	none	not plastid	0	PM	99.6938
Solyc01g102410.2.1	Glutaminyl-tRNA synthetase (AHRD V1 ***- A8BEZ0_GIALA); contains Interpro domain(s) IPR004526 Glutamyl-tRNA synthetase, class Ic, archaeal/eukaryotic cytosolic	S	5	-	plastid	plastid	4	C	94.8311
Solyc01g102470.2.1	Pentatricopeptide repeat-containing protein (AHRD V1 *-*- D7MEW5_ARALY); contains Interpro domain(s) IPR002885 Pentatricopeptide repeat	plastid	3	Y	plastid	plastid	14	plastid	84.8511
Solyc01g102550.2.1	Nucleoporin-like protein (AHRD V1 *-*- Q6YWF9_ORYSJ)	plastid	1	Y	none	not plastid	0	PM	36.3117
Solyc01g102720.2.1	START domain containing 10 (Fragment) (AHRD V1 **-- Q52LA1_MOUSE); contains Interpro domain(s) IPR002913 Lipid-binding START	plastid	4	-	none	plastid	13	N	72.3883
Solyc01g102730.2.1	Cinnamoyl-CoA reductase family (AHRD V1 ***- D7LQ28_ARALY); contains Interpro domain(s) IPR016040 NAD(P)-binding domain	-	3	-	none	plastid	12	plastid	40.0753
Solyc01g102770.1.1	Photosystem II reaction center protein Z (AHRD V1 ***- Q5IHA1_9SOLN); contains Interpro domain(s) IPR002644 Photosystem II protein PsbZ	S	1	Y	ER	not plastid	0	EX	50.3249
Solyc01g102800.2.1	Histidyl-tRNA synthetase (AHRD V1 *-*- Q52NV4_HUMAN); contains Interpro domain(s) IPR015807 Histidyl-tRNA synthetase, class IIa, subgroup	plastid	4	Y	none	not plastid	0	C	99.9342
Solyc01g102820.2.1	2-C-methyl-D-erythritol 4-phosphate cytidylyltransferase (AHRD V1 ***- A9ZN09_HEVBR); contains Interpro domain(s) IPR001228 4-diphosphocytidyl-2C-methyl-D-erythritol synthase	plastid	2	Y	plastid	plastid	13	plastid	99.089
Solyc01g102860.2.1	Unknown Protein (AHRD V1)	plastid	2	Y	plastid	plastid	17	plastid	81.2253
Solyc01g102920.2.1	Tir-nbs, resistance protein fragment	S	4	-	possibly plastid	plastid	2	PM	84.743
Solyc01g102950.2.1	FAD dependent oxidoreductase (AHRD V1 **-- B5VX05_SPIMA)	M	4	Y	plastid	plastid	12	M	44.8689
Solyc01g102990.2.1	ATP-dependent Clp protease ATP-binding subunit clpX (AHRD V1 ***- B6SSC5_MAIZE); contains Interpro domain(s) IPR004487 ClpX, ATPase regulatory subunit	plastid	2	Y	M	plastid	14	M	99.9994
Solyc01g103100.2.1	Short-chain dehydrogenase/reductase SDR (AHRD V1 ***- A6C8Y5_9PLAN); contains Interpro domain(s) IPR002347 Glucose/ribitol dehydrogenase	plastid	2	Y	plastid	plastid	12	plastid	99.5712
Solyc01g103110.2.1	Unknown Protein (AHRD V1); contains Interpro domain(s) IPR007434 Protein of unknown function DUF482	plastid	4	Y	possibly plastid	plastid	17	plastid	95.8307
Solyc01g103160.2.1	Pentatricopeptide repeat-containing protein (AHRD V1 *-*- D7LST4_ARALY); contains Interpro domain(s) IPR002885 Pentatricopeptide repeat	M	3	Y	M	plastid	7	N	86.1205
Solyc01g103170.2.1	Lysine ketoglutarate reductase trans-splicing related 1-like (AHRD V1 ***- Q5JLN0_ORYSJ); contains Interpro domain(s) IPR007877 Protein of unknown function DUF707	S	4	Y	none	plastid	2	G	69.0165
Solyc01g103210.2.1	Unknown Protein (AHRD V1)	plastid	5	-	possibly ER	plastid	3	EX	92.4908
Solyc01g103290.2.1	Unknown Protein (AHRD V1)	plastid	5	Y	-	plastid	9	V	98.5184
Solyc01g103360.2.1	Expressed protein (Fragment) (AHRD V1 ***- B3VV14_POPTN); contains Interpro domain(s) IPR006514 Protein of unknown function DUF579, plant	S	2	Y	ER	plastid	4	PM	76.8461
Solyc01g103390.2.1	Flavin oxidoreductase/NADH oxidase (AHRD V1 **-- A0YMI2_LYNSP); contains Interpro domain(s) IPR001155 NADH:flavin oxidoreductase/NADH oxidase, N-terminal	plastid	4	-	possibly plastid	plastid	9	M	50.2188
Solyc01g103400.2.1	Unknown Protein (AHRD V1)	S	2	Y	ER	plastid	8	PM	99.8027
Solyc01g103430.2.1	Glycogen synthase kinase (AHRD V1 **** C7AE95_SOYBN); contains Interpro domain(s) IPR002290 Serine/threonine protein kinase	plastid	4	-	none	plastid	2	C	97.2619
Solyc01g103440.2.1	Phosphoribosylamine--glycine ligase (AHRD V1 ***- D7KJV0_ARALY); contains Interpro domain(s) IPR000115 Phosphoribosylglycinamide synthetase	plastid	1	Y	plastid	plastid	12	plastid	99.9996
Solyc01g103450.2.1	Chaperone DnaK (AHRD V1 ***- Q1SKX2_MEDTR); contains Interpro domain(s) IPR012725 Chaperone DnaK	plastid	1	Y	plastid	plastid	14	plastid	60.0415
Solyc01g103500.2.1	Unknown Protein (AHRD V1)	S	1	Y	ER	plastid	7	PM	52.6227
Solyc01g103510.2.1	Ribosomal protein L3-like (AHRD V1 ***- Q2VCJ2_SOLTU); contains Interpro domain(s) IPR000597 Ribosomal protein L3	plastid	3	Y	none	plastid	2	C	99.9925
Solyc01g103530.2.1	Receptor like kinase, RLK	S	4	Y	ER	not plastid	0	PM	99.7701
Solyc01g103580.2.1	Genomic DNA chromosome 5 P1 clone MCL19 (AHRD V1 ***- Q9FNL3_ARATH); contains Interpro domain(s) IPR007770 Protein of unknown function DUF679	plastid	4	-	none	not plastid	0	PM	49.4717
Solyc01g103620.2.1	Sodium Bile acid symporter family protein expressed (AHRD V1 **** Q2QX41_ORYSJ); contains Interpro domain(s) IPR002657 Bile acid:sodium symporter	plastid	5	-	plastid	plastid	2	plastid	51.0962
Solyc01g103690.2.1	ATP-dependent RNA helicase A (AHRD V1 *-*- B0W4E8_CULQU); contains Interpro domain(s) IPR014001 DEAD-like helicase, N-terminal	plastid	3	-	none	not plastid	0	N	99.9997
Solyc01g103710.2.1	Fe/S biogenesis protein nfuA (AHRD V1 *--- NFUA_BUCCC); contains Interpro domain(s) IPR001075 NIF system FeS cluster assembly, NifU, C-terminal	plastid	1	Y	plastid	plastid	13	M	78.8398
Solyc01g103750.2.1	ATP phosphoribosyltransferase (AHRD V1 **** O46887_THLGO); contains Interpro domain(s) IPR001348 Histidine biosynthesis HisG: ATP phosphoribosyltransferase	plastid	2	Y	plastid	plastid	19	plastid	53.7589
Solyc01g103880.2.1	BZIP transcription factor family protein expressed (AHRD V1 *--- Q2R8T2_ORYSJ)	plastid	5	Y	none	plastid	2	C	87.4274
Solyc01g103920.2.1	Ferredoxin I (AHRD V1 ***- Q93XJ9_SOLTU); contains Interpro domain(s) IPR010241 Ferredoxin [2Fe-2S], plant	-	5	Y	plastid	plastid	9	plastid	99.9992
Solyc01g103950.2.1	Thiamine-phosphate pyrophosphorylase/thiamine-phosphate pyrophosphorylase (AHRD V1 **-- A9NB66_COXBR); contains Interpro domain(s) IPR004399 Phosphomethylpyrimidine kinase type-2	plastid	5	Y	plastid	plastid	14	plastid	99.6926
Solyc01g104000.2.1	Serine hydroxymethyltransferase (AHRD V1 ***- A9PL12_POPTM); contains Interpro domain(s) IPR001085 Serine hydroxymethyltransferase	plastid	4	Y	none	plastid	7	C	79.4505
Solyc01g104010.2.1	F2E2.8 (AHRD V1 ***- Q9LM58_ARATH)	-	3	Y	none	plastid	5	plastid	80.7371
Solyc01g104020.2.1	Embryo-specific 3 (AHRD V1 ***- Q2HUA9_MEDTR); contains Interpro domain(s) IPR010417 Embryo-specific 3	S	1	Y	ER	plastid	9	EX	98.9531
Solyc01g104040.2.1	UDP-glucose glycoprotein glucosyltransferase (AHRD V1 **** D7KYS8_ARALY); contains Interpro domain(s) IPR009448 UDP-glucose:Glycoprotein Glucosyltransferase	S	3	Y	ER	plastid	9	ER	91.515
Solyc01g104050.2.1	Receptor-like kinase (AHRD V1 ***- A7VM41_MARPO); contains Interpro domain(s) IPR002290 Serine/threonine protein kinase	S	1	Y	ER	not plastid	0	PM	99.9961
Solyc01g104060.2.1	Aminomethyltransferase (AHRD V1 ***- B0JMM8_MICAN); contains Interpro domain(s) IPR006222 Glycine cleavage T-protein, N-terminal	plastid	3	Y	plastid	plastid	11	plastid	94.05
Solyc01g104090.2.1	Pentatricopeptide repeat-containing protein (AHRD V1 ***- D7M9F5_ARALY); contains Interpro domain(s) IPR002885 Pentatricopeptide repeat	-	4	Y	none	plastid	13	C	94.6196
Solyc01g104160.2.1	Uncharacterised protein At1g10890 (AHRD V1 *--- Y1089_ARATH)	plastid	2	Y	none	not plastid	0	N	99.9722
Solyc01g104240.2.1	Hydroxyproline-rich glycoprotein-like (AHRD V1 *-*- Q5JLQ2_ORYSJ)	-	5	Y	none	plastid	8	PM	88.3107
Solyc01g104250.2.1	Rhomboid-like protein (AHRD V1 ***- B6T5H4_MAIZE); contains Interpro domain(s) IPR002610 Peptidase S54, rhomboid	M	4	-	plastid	plastid	11	plastid	81.8879
Solyc01g104270.2.1	Os12g0283800 protein (Fragment) (AHRD V1 *-*- Q0INW6_ORYSJ)	-	5	-	plastid	plastid	6	P	29.9162
Solyc01g104300.2.1	Unknown Protein (AHRD V1); contains Interpro domain(s) IPR006927 Protein of unknown function DUF639	plastid	5	Y	none	plastid	5	PM	67.0158
Solyc01g104310.2.1	Patatin-like phospholipase domain-containing protein (AHRD V1 *-*- B6KR35_TOXGO); contains Interpro domain(s) IPR002641 Patatin	plastid	2	Y	plastid	plastid	11	plastid	90.9966
Solyc01g104320.2.1	PAP fibrillin (AHRD V1 ***- A2Q498_MEDTR); contains Interpro domain(s) IPR006843 PAP fibrillin	plastid	1	Y	plastid	plastid	12	plastid	99.8846
Solyc01g104480.2.1	Unknown Protein (AHRD V1)	plastid	4	-	none	not plastid	0	N	97.7794
Solyc01g104490.2.1	Separin (AHRD V1 *--- C5JQX2_AJEDS); contains Interpro domain(s) IPR005314 Peptidase C50, separase	plastid	4	Y	possibly plastid	not plastid	0	C	99.8145
Solyc01g104520.1.1	Kinetochore protein (AHRD V1 ***- D7LUW1_ARALY); contains Interpro domain(s) IPR005550 Kinetochore protein Ndc80	plastid	2	Y	none	plastid	11	N	79.1534
Solyc01g104540.2.1	Unknown Protein (AHRD V1)	plastid	3	-	none	not plastid	0	N	99.332
Solyc01g104570.2.1	Kinetochore protein ndc80 (AHRD V1 *-*- B6K5V0_SCHJY); contains Interpro domain(s) IPR005550 Kinetochore protein Ndc80	M	5	Y	none	plastid	4	N	96.7448
Solyc01g104580.2.1	Harpin-induced protein 1 containing protein expressed (AHRD V1 ***- Q10NQ5_ORYSJ); contains Interpro domain(s) IPR010847 Harpin-induced 1	-	5	Y	none	plastid	14	PM	52.2159
Solyc01g104630.2.1	Pentatricopeptide repeat-containing protein (AHRD V1 ***- D7L9C2_ARALY); contains Interpro domain(s) IPR002885 Pentatricopeptide repeat	M	3	-	M	plastid	7	plastid	42.6208
Solyc01g104650.2.1	BZIP transcription factor (AHRD V1 **** Q53UC6_WHEAT); contains Interpro domain(s) IPR011700 Basic leucine zipper	plastid	2	Y	none	plastid	4	N	99.9932
Solyc01g104660.2.1	Exocyst subunit Exo70-interacting protein Roh1 (Fragment) (AHRD V1 *-*- C1IJU1_TOBAC); contains Interpro domain(s) IPR008511 Protein of unknown function DUF793	plastid	4	-	none	plastid	7	C	47.1797
Solyc01g104790.2.1	Unknown Protein (AHRD V1)	plastid	1	Y	none	plastid	2	C	70.7272
Solyc01g104880.2.1	Phosphatidylserine decarboxylase proenzyme 2 (AHRD V1 **** D3AWK7_POLPA); contains Interpro domain(s) IPR005221 Phosphatidylserine decarboxylase	plastid	2	Y	none	plastid	2	N	67.3798
Solyc01g104940.1.1	F-box (AHRD V1 *-*- Q84KQ8_PRUMU); contains Interpro domain(s) IPR001810 Cyclin-like F-box	plastid	5	-	none	not plastid	0	C	89.2929
Solyc01g104950.2.1	Alpha-L-arabinofuranosidase/beta-D-xylosidase (AHRD V1 **** D9D7L0_MALDO); contains Interpro domain(s) IPR001764 Glycoside hydrolase, family 3, N-terminal	S	5	Y	possibly ER	plastid	2	G	81.3695
Solyc01g104980.2.1	Kelch-like protein 14 (AHRD V1 ***- B6T7I5_MAIZE); contains Interpro domain(s) IPR015915 Kelch-type beta propeller	plastid	4	-	none	plastid	6	C	63.4899
Solyc01g105000.2.1	Copper chaperone (AHRD V1 *--- D3GC04_9ROSI); contains Interpro domain(s) IPR006121 Heavy metal transport/detoxification protein	M	3	Y	none	plastid	6	M	45.9976
Solyc01g105010.2.1	Non-specific lipid-transfer protein (AHRD V1 ***- Q6I6X1_ZINEL); contains Interpro domain(s) IPR013770 Plant lipid transfer protein and hydrophobic protein, helical	S	2	Y	ER	not plastid	0	EX	95.0042
Solyc01g105020.2.1	Phosphatase PTC7 homolog (AHRD V1 *-*- C1BT38_9MAXI); contains Interpro domain(s) IPR001932 Protein phosphatase 2C-related	plastid	5	Y	none	plastid	4	C	71.7929
Solyc01g105030.2.1	Chlorophyll a-b binding protein, chloroplastic (AHRD V1 **** CB12_PETHY); contains Interpro domain(s) IPR001344 Chlorophyll A-B binding protein	plastid	3	Y	plastid	plastid	14	plastid	99.9999
Solyc01g105050.2.1	Chlorophyll a-b binding protein, chloroplastic (AHRD V1 **** CB12_PETHY); contains Interpro domain(s) IPR001344 Chlorophyll A-B binding protein	plastid	3	Y	plastid	plastid	12	plastid	99.9995
Solyc01g105060.2.1	(3R)-hydroxymyristoyl- (AHRD V1 ***- Q9LX13_ARATH); contains Interpro domain(s) IPR010084 Beta-hydroxyacyl-(acyl-carrier-protein) dehydratase FabZ	plastid	1	Y	plastid	plastid	12	plastid	97.0405
Solyc01g105090.2.1	Chloroplastic group IIA intron splicing facilitator CRS1, chloroplastic (AHRD V1 *--- CRS1_MAIZE); contains Interpro domain(s) IPR001890 RNA-binding, CRM domain	plastid	5	-	none	plastid	10	C	53.2546
Solyc01g105170.2.1	Copper-exporting P-type ATPase A (AHRD V1 *-*- COPA_STAHJ); contains Interpro domain(s) IPR001757 ATPase, P-type, K/Mg/Cd/Cu/Zn/Na/Ca/Na/H-transporter	plastid	3	Y	plastid	plastid	12	plastid	99.4939
Solyc01g105220.2.1	Alternative oxidase (AHRD V1 **** B2CKL9_VITVI); contains Interpro domain(s) IPR002680 Alternative oxidase	M	4	Y	M	plastid	2	M	99.9903
Solyc01g105250.1.1	Unknown Protein (AHRD V1)	S	4	Y	ER	plastid	9	V	53.8571
Solyc01g105260.1.1	Integral membrane protein (AHRD V1 **-- B6U6B5_MAIZE); contains Interpro domain(s) IPR008217 Protein of unknown function DUF125, transmembrane	S	3	-	none	not plastid	0	plastid	82.7259
Solyc01g105280.2.1	Protein phosphatase 2C-like (AHRD V1 ***- A2Q6E4_MEDTR); contains Interpro domain(s) IPR015655 Protein phosphatase 2C	plastid	5	Y	none	plastid	10	plastid	69.0885
Solyc01g105310.2.1	Metacaspase (AHRD V1 ***- A8NU42_COPC7); contains Interpro domain(s) IPR011600 Peptidase C14, caspase catalytic	M	4	Y	none	plastid	4	C	98.6281
Solyc01g105360.2.1	UDP-glucuronosyltransferase (AHRD V1 **** Q5UB81_ARATH); contains Interpro domain(s) IPR002213 UDP-glucuronosyl/UDP-glucosyltransferase	-	4	-	plastid	plastid	5	PM	30.2315
Solyc01g105380.1.1	Unknown Protein (AHRD V1)	M	4	Y	possibly plastid	not plastid	0	C	44.3007
Solyc01g105390.2.1	Phospho-2-dehydro-3-deoxyheptonate aldolase 2 (AHRD V1 ***- B6UAK5_MAIZE); contains Interpro domain(s) IPR002480 DAHP synthetase, class II	-	3	-	none	not plastid	0	plastid	99.6643
Solyc01g105460.2.1	1 4-dihydroxy-2-naphthoate octaprenyltransferase (AHRD V1 **** B6UA12_MAIZE); contains Interpro domain(s) IPR011937 1,4-dihydroxy-2-naphthoate phytyltransferase	plastid	1	Y	plastid	plastid	14	plastid	75.4026
Solyc01g105540.2.1	2-oxoglutarate/malate translocator (AHRD V1 **-- Q9FMF7_ARATH); contains Interpro domain(s) IPR001898 Sodium/sulphate symporter	plastid	3	Y	plastid	plastid	11	plastid	99.999
Solyc01g105560.2.1	3 4-dihydroxy-2-butanone 4-phosphate synthase (AHRD V1 ***- D7CLR6_SYNLT); contains Interpro domain(s) IPR000422 DHBP synthase RibB	plastid	1	Y	plastid	plastid	11	plastid	99.9978
Solyc01g105600.2.1	Unknown Protein (AHRD V1)	M	3	Y	possibly plastid	plastid	10	plastid	84.1907
Solyc01g105670.2.1	Calcium-dependent protein kinase (AHRD V1 **** B6UA37_MAIZE); contains Interpro domain(s) IPR002290 Serine/threonine protein kinase	plastid	5	-	none	not plastid	0	C	99.9724
Solyc01g105730.1.1	Periaxin-like protein (AHRD V1 *--- Q9LXB8_ARATH)	S	4	Y	ER	plastid	6	ER	37.6979
Solyc01g105740.1.1	Unknown Protein (AHRD V1)	S	4	Y	ER	plastid	12	EX	46.0888
Solyc01g105870.2.1	(E)-beta-ocimene synthase (AHRD V1 **** Q5CD81_CITUN); contains Interpro domain(s) IPR005630 Terpene synthase, metal-binding domain	plastid	3	Y	plastid	plastid	13	plastid	60.3389
Solyc01g105880.2.1	(E)-beta-ocimene synthase (AHRD V1 **** Q5CD81_CITUN); contains Interpro domain(s) IPR005630 Terpene synthase, metal-binding domain	plastid	3	Y	possibly M	plastid	8	C	61.4193
Solyc01g105890.2.1	(E)-beta-ocimene synthase (AHRD V1 **** Q5CD81_CITUN); contains Interpro domain(s) IPR005630 Terpene synthase, metal-binding domain	plastid	4	Y	possibly plastid	plastid	8	C	92.815
Solyc01g105900.2.1	(E)-beta-ocimene synthase (AHRD V1 **** Q5CD81_CITUN); contains Interpro domain(s) IPR005630 Terpene synthase, metal-binding domain	plastid	4	Y	possibly M	plastid	2	plastid	99.9813
Solyc01g105910.1.1	D-limonene synthase (AHRD V1 ***- Q6F5H2_CITUN); contains Interpro domain(s) IPR001906 Terpene synthase-like	plastid	2	-	none	plastid	8	plastid	99.8529
Solyc01g105920.2.1	(E)-beta-ocimene synthase (AHRD V1 **** Q5CD81_CITUN); contains Interpro domain(s) IPR005630 Terpene synthase, metal-binding domain	plastid	4	Y	plastid	plastid	7	plastid	54.2322
Solyc01g105930.1.1	D-limonene synthase (AHRD V1 ***- Q6F5H2_CITUN); contains Interpro domain(s) IPR001906 Terpene synthase-like	plastid	5	-	possibly plastid	plastid	9	plastid	99.6033
Solyc01g105980.2.1	Unknown Protein (AHRD V1)	-	5	Y	none	not plastid	0	P	65.0917
Solyc01g105990.2.1	Os01g0107900 protein (Fragment) (AHRD V1 *-*- Q0JRC9_ORYSJ)	plastid	1	Y	plastid	plastid	12	N	37.8693
Solyc01g106010.2.1	Fructose-1 6-bisphosphatase class 1 (AHRD V1 ***- D3PE46_DEFDS); contains Interpro domain(s) IPR000146 Fructose-1,6-bisphosphatase	-	3	-	none	plastid	6	plastid	96.5869
Solyc01g106020.2.1	Nucleic acid binding protein (AHRD V1 **-* B6U784_MAIZE); contains Interpro domain(s) IPR018111 K Homology, type 1, subgroup	plastid	2	Y	none	plastid	14	plastid	58.7905
Solyc01g106050.2.1	Dynamin-2 (AHRD V1 ***- D0MQ53_PHYIN); contains Interpro domain(s) IPR000375 Dynamin central region	plastid	5	-	none	plastid	3	C	99.9168
Solyc01g106080.2.1	Methylmalonate-semialdehyde dehydrogenase (AHRD V1 **** D3BUA7_POLPA); contains Interpro domain(s) IPR010061 Methylmalonate-semialdehyde dehydrogenase IPR015590 Aldehyde dehydrogenase	M	4	Y	M	plastid	8	M	91.9794
Solyc01g106090.2.1	Photosystem II oxygen evolving complex protein PsbP (AHRD V1 *-*- B8HJK6_CYAP4); contains Interpro domain(s) IPR002683 Photosystem II oxygen evolving complex protein PsbP	M	3	-	none	plastid	11	plastid	100
Solyc01g106190.2.1	Os11g0167200 protein (Fragment) (AHRD V1 *-*- Q0IUD3_ORYSJ)	M	3	-	possibly plastid	plastid	10	M	50.8496
Solyc01g106210.2.1	Chaperone DnaK (AHRD V1 ***- A2Q199_MEDTR); contains Interpro domain(s) IPR012725 Chaperone DnaK	M	2	Y	M	plastid	3	M	98.6654
Solyc01g106260.2.1	Chaperone DnaK (AHRD V1 ***- A2Q199_MEDTR); contains Interpro domain(s) IPR012725 Chaperone DnaK	M	2	Y	M	plastid	2	M	99.6233
Solyc01g106280.2.1	DNA-binding bromodomain-containing protein (AHRD V1 *--* D7KG11_ARALY); contains Interpro domain(s) IPR001487 Bromodomain	plastid	5	-	possibly plastid	plastid	4	N	99.9999
Solyc01g106380.2.1	Genomic DNA chromosome 5 BAC clone T12B11 (AHRD V1 ***- Q9FGE8_ARATH)	M	5	Y	plastid	plastid	4	C	54.0922
Solyc01g106390.2.1	Glutamyl-tRNA reductase (AHRD V1 ***- A5BZY3_VITVI); contains Interpro domain(s) IPR000343 Tetrapyrrole biosynthesis, glutamyl-tRNA reductase	plastid	1	Y	plastid	plastid	14	plastid	100
Solyc01g106400.2.1	Peptide methionine sulfoxide reductase msrB (AHRD V1 ***- B6T2C6_MAIZE); contains Interpro domain(s) IPR002579 Methionine sulphoxide reductase B	plastid	4	Y	none	plastid	11	C	98.5383
Solyc01g106430.2.1	Inorganic pyrophosphatase family protein (AHRD V1 **** D7M262_ARALY); contains Interpro domain(s) IPR008162 Inorganic pyrophosphatase	plastid	3	Y	plastid	plastid	14	M	59.8417
Solyc01g106450.2.1	L-galactose dehydrogenase (AHRD V1 **-* Q07A10_NICLS); contains Interpro domain(s) IPR001395 Aldo/keto reductase	M	3	-	possibly plastid	plastid	7	V	47.1934
Solyc01g106590.2.1	Leaf senescence protein-like (AHRD V1 **-- Q8H2I6_ORYSJ); contains Interpro domain(s) IPR004253 Protein of unknown function DUF231, plant	S	5	Y	possibly ER	plastid	7	G	99.4793
Solyc01g106690.2.1	Unknown Protein (AHRD V1); contains Interpro domain(s) IPR010410 Protein of unknown function DUF1005	plastid	5	-	none	plastid	3	PM	50.6589
Solyc01g106720.1.1	MADS-box transcription factor (AHRD V1 *-*- Q6S5H1_NEMVE); contains Interpro domain(s) IPR002100 Transcription factor, MADS-box	-	5	Y	none	plastid	2	N	99.9975
Solyc01g106740.2.1	Aspartyl-tRNA synthetase (AHRD V1 **** D8FUD3_9CYAN); contains Interpro domain(s) IPR004524 Aspartyl-tRNA synthetase, class IIb, bacterial/mitochondrial type	plastid	2	Y	M	plastid	9	M	94.4626
Solyc01g106750.1.1	Unknown Protein (AHRD V1)	plastid	1	Y	plastid	plastid	4	N	91.0005
Solyc01g106780.2.1	Pyruvate kinase (AHRD V1 **** B9GIN5_POPTR); contains Interpro domain(s) IPR001697 Pyruvate kinase	-	3	Y	plastid	not plastid	0	C	98.1361
Solyc01g106790.2.1	Tubulin alpha-6 chain (AHRD V1 **-- B6SR73_MAIZE)	plastid	2	Y	possibly plastid	plastid	11	P	43.3437
Solyc01g106810.2.1	Unknown Protein (AHRD V1)	plastid	4	Y	none	plastid	7	plastid	88.6635
Solyc01g106820.2.1	Peptidase M50 family (AHRD V1 ***- B6UET0_MAIZE)	plastid	2	Y	plastid	plastid	3	plastid	84.8338
Solyc01g106880.2.1	Ribosomal RNA small subunit methyltransferase E (AHRD V1 ***- C6WZC1_FLAB3); contains Interpro domain(s) IPR006700 Ribosomal RNA small subunit methyltransferase E	plastid	3	Y	plastid	plastid	20	plastid	85.4306
Solyc01g106890.2.1	Unknown Protein (AHRD V1)	plastid	5	-	plastid	plastid	8	C	68.2987
Solyc01g107030.2.1	Somatic embryogenesis related protein (AHRD V1 ***- B6TIS5_MAIZE)	plastid	2	-	none	not plastid	0	N	99.955
Solyc01g107060.2.1	Unknown Protein (AHRD V1)	plastid	4	Y	-	plastid	11	EX	86.4374
Solyc01g107090.2.1	Beta-1 4-xylosidase (AHRD V1 *-*- D7LA14_ARALY)	M	5	Y	none	not plastid	0	N	87.1302
Solyc01g107100.2.1	Beta-1 4-xylosidase (AHRD V1 ***- D7LA14_ARALY)	M	5	Y	none	not plastid	0	N	79.7562
Solyc01g107110.2.1	Unknown Protein (AHRD V1)	plastid	5	-	-	not plastid	0	N	98.1088
Solyc01g107200.2.1	Os02g0794300 protein (Fragment) (AHRD V1 *-*- Q0DWU9_ORYSJ); contains Interpro domain(s) IPR007573 Protein of unknown function DUF566	plastid	3	Y	plastid	plastid	3	N	99.958
Solyc01g107240.2.1	Peroxisomal membrane MPV17/PMP22-like protein (AHRD V1 *--- A8J1X1_CHLRE); contains Interpro domain(s) IPR007248 Mpv17/PMP22	M	3	-	possibly M	plastid	11	plastid	69.5924
Solyc01g107250.2.1	LRR receptor-like serine/threonine-protein kinase, RLP	S	3	Y	ER	plastid	2	EX	93.5747
Solyc01g107260.2.1	Transport protein-related (AHRD V1 *-*- Q1EPF1_MUSAC)	plastid	4	Y	none	not plastid	0	N	98.1323
Solyc01g107270.2.1	Phosphoribosylformylglycinamidine synthase (AHRD V1 ***- A9Y5J1_ARATH); contains Interpro domain(s) IPR010073 Phosphoribosylformylglycinamidine synthase, eukaryotes and proteobacteria	plastid	3	Y	none	plastid	20	C	92.3239
Solyc01g107320.2.1	Pentatricopeptide repeat-containing protein (AHRD V1 ***- D7M7W8_ARALY); contains Interpro domain(s) IPR002885 Pentatricopeptide repeat	plastid	5	Y	none	plastid	7	C	79.8182
Solyc01g107330.2.1	SWIB/MDM2 domain protein (AHRD V1 ***- D6VG39_9BURK); contains Interpro domain(s) IPR019835 SWIB domain	plastid	2	Y	plastid	plastid	18	plastid	99.4632
Solyc01g107340.2.1	Unknown Protein (AHRD V1)	plastid	5	Y	ER	plastid	3	EX	52.442
Solyc01g107350.2.1	Os12g0581300 protein (Fragment) (AHRD V1 *-*- Q0IMB2_ORYSJ); contains Interpro domain(s) IPR006873 Protein of unknown function DUF620	plastid	2	Y	none	plastid	2	C	54.3012
Solyc01g107380.2.1	Seed maturation protein PM23 (Fragment) (AHRD V1 ***- Q9SEL1_SOYBN)	plastid	1	Y	plastid	plastid	2	M	36.4272
Solyc01g107450.2.1	Unknown Protein (AHRD V1)	plastid	3	Y	M	plastid	14	M	91.4325
Solyc01g107500.2.1	Unknown Protein (AHRD V1)	plastid	1	Y	none	not plastid	0	N	99.9867
Solyc01g107520.2.1	PBSP domain-containing protein (AHRD V1 **-- C9S7G7_VERA1); contains Interpro domain(s) IPR007541 Plant Basic Secretory Protein	S	1	Y	ER	plastid	2	EX	76.941
Solyc01g107560.2.1	UDP-glucosyltransferase 1 (AHRD V1 **** C6ZRH7_CAPAN); contains Interpro domain(s) IPR002213 UDP-glucuronosyl/UDP-glucosyltransferase	-	5	Y	none	plastid	8	plastid	89.1589
Solyc01g107610.2.1	PRKR interacting protein 1 (AHRD V1 *-*- B6TNU4_MAIZE); contains Interpro domain(s) IPR009548 Protein of unknown function DUF1168	plastid	4	Y	none	plastid	6	N	99.6696
Solyc01g107640.2.1	Tic21 (AHRD V1 **-- Q09S70_PEA)	plastid	3	Y	possibly plastid	plastid	14	PM	70.2799
Solyc01g107660.2.1	Stress enhanced protein 1 (Fragment) (AHRD V1 *-*- C6JT32_9MYRT)	plastid	1	Y	plastid	plastid	13	plastid	94.5044
Solyc01g107670.2.1	LRR receptor-like serine/threonine-protein kinase, RLP	S	1	Y	ER	plastid	9	EX	51.7547
Solyc01g107750.2.1	Phosphatase and tensin-like A (AHRD V1 *--- C5IX04_APIME); contains Interpro domain(s) IPR014020 Tensin phosphatase, C2 domain	plastid	4	Y	none	not plastid	0	C	99.1373
Solyc01g107800.2.1	Expressed protein (Fragment) (AHRD V1 *-*- B3VV16_POPTN); contains Interpro domain(s) IPR006514 Protein of unknown function DUF579, plant	-	4	Y	none	plastid	4	G	99.4693
Solyc01g107840.2.1	Immediate-early salicylate-induced glucosyltransferase (AHRD V1 *-*- P93364_TOBAC)	-	5	-	possibly plastid	plastid	2	EX	96.7783
Solyc01g107860.2.1	CBS domain-containing protein-like (AHRD V1 ***- B8AP73_ORYSI); contains Interpro domain(s) IPR000644 Cystathionine beta-synthase, core	plastid	1	Y	plastid	plastid	13	plastid	97.8986
Solyc01g107880.2.1	Membrane-associated ring finger 6 (AHRD V1 *--- B3VKM1_PIG); contains Interpro domain(s) IPR011016 Zinc finger, RING-CH-type	plastid	2	Y	none	plastid	1	PM	56.0195
Solyc01g107920.2.1	Os07g0175100 protein (Fragment) (AHRD V1 ***- Q0D898_ORYSJ)	S	1	Y	ER	plastid	12	PM	53.3874
Solyc01g107930.2.1	RING-finger protein like (AHRD V1 *-*- B6SVN2_MAIZE); contains Interpro domain(s) IPR018957 Zinc finger, C3HC4 RING-type	plastid	4	Y	none	plastid	3	N	99.7651
Solyc01g107940.2.1	RING-finger protein like (AHRD V1 *-*- B6SVN2_MAIZE); contains Interpro domain(s) IPR018957 Zinc finger, C3HC4 RING-type	plastid	5	Y	none	plastid	2	N	95.0536
Solyc01g108010.2.1	Limkain b1-like protein (AHRD V1 *--- Q66S24_OIKDI); contains Interpro domain(s) IPR007491 Protein of unknown function DUF537	plastid	5	-	none	plastid	4	C	84.6498
Solyc01g108020.2.1	Thioredoxin m (AHRD V1 ***- B9HS17_POPTR); contains Interpro domain(s) IPR015467 Thioredoxin, core	plastid	2	-	plastid	plastid	13	plastid	99.7932
Solyc01g108070.2.1	4-methyl-5(B-hydroxyethyl)-thiazole monophosphate biosynthesis enzyme (AHRD V1 *-*- C5BNJ2_TERTT); contains Interpro domain(s) IPR006287 DJ-1	-	3	-	possibly plastid	plastid	4	P	52.6032
Solyc01g108110.2.1	Alpha 1 3 fucosyltransferase (AHRD V1 **** Q5DTC8_MEDSA); contains Interpro domain(s) IPR001503 Glycosyl transferase, family 10	plastid	4	-	possibly plastid	plastid	4	G	99.1641
Solyc01g108130.2.1	B3 domain-containing protein At3g19184 (AHRD V1 *-*- Y3918_ARATH); contains Interpro domain(s) IPR003340 Transcriptional factor B3	plastid	5	-	none	not plastid	0	N	99.9971
Solyc01g108180.2.1	Pentatricopeptide repeat-containing protein (AHRD V1 ***- D7MA46_ARALY); contains Interpro domain(s) IPR002885 Pentatricopeptide repeat	M	5	Y	M	not plastid	0	C	82.7613
Solyc01g108190.2.1	Calmodulin-like protein (AHRD V1 ***- Q67TZ4_ORYSJ); contains Interpro domain(s) IPR011992 EF-Hand type	plastid	4	Y	possibly plastid	plastid	13	C	99.4276
Solyc01g108200.2.1	cDNA clone J013057C16 full insert sequence (AHRD V1 *-*- B7F5R8_ORYSJ)	plastid	2	Y	plastid	plastid	14	plastid	94.6447
Solyc01g108230.2.1	LAG1 longevity assurance homolog 2 (AHRD V1 **-- C1BLI2_OSMMO); contains Interpro domain(s) IPR006634 TRAM, LAG1 and CLN8 homology	S	5	-	possibly plastid	plastid	3	G	54.8792
Solyc01g108310.2.1	Os11g0248200 protein (Fragment) (AHRD V1 *--- Q0ITJ6_ORYSJ); contains Interpro domain(s) IPR006630 RNA-binding protein Lupus La	plastid	5	-	none	plastid	1	N	99.7524
Solyc01g108350.2.1	Copper ion binding protein (AHRD V1 **-- B6TG98_MAIZE); contains Interpro domain(s) IPR008972 Cupredoxin	S	1	Y	ER	plastid	7	PM	48.1956
Solyc01g108360.2.1	Copper ion binding protein (AHRD V1 **-- B6TG98_MAIZE); contains Interpro domain(s) IPR008972 Cupredoxin	S	1	Y	ER	not plastid	0	PM	66.8654
Solyc01g108380.1.1	Protease inhibitor protein (AHRD V1 -**- B3FNP9_HEVBR); contains Interpro domain(s) IPR000864 Proteinase inhibitor I13, potato inhibitor I	plastid	2	-	none	plastid	11	plastid	88.6133
Solyc01g108410.1.1	Pentatricopeptide repeat-containing protein (AHRD V1 ***- D7M761_ARALY); contains Interpro domain(s) IPR002885 Pentatricopeptide repeat	M	3	Y	M	plastid	3	C	88.5269
Solyc01g108440.2.1	Calmodulin-binding protein (AHRD V1 **-* D7L4F9_ARALY); contains Interpro domain(s) IPR012442 Protein of unknown function DUF1645	-	4	Y	none	not plastid	0	N	96.1334
Solyc01g108450.2.1	Serine carboxypeptidase 1 (AHRD V1 **** B6SW38_MAIZE); contains Interpro domain(s) IPR001563 Peptidase S10, serine carboxypeptidase	M	3	-	plastid	plastid	19	V	82.897
Solyc01g108550.1.1	Unknown Protein (AHRD V1)	plastid	4	-	-	not plastid	0	N	93.7299
Solyc01g108600.2.1	Presequence protease, mitochondrial (AHRD V1 **-- PREP_DANRE); contains Interpro domain(s) IPR013578 Peptidase M16C associated	plastid	4	Y	plastid	plastid	12	M	82.1254
Solyc01g108630.2.1	Nitrite reductase (AHRD V1 ***- Q76KB0_TOBAC); contains Interpro domain(s) IPR006067 Nitrite and sulphite reductase 4Fe-4S region	plastid	2	Y	possibly M	plastid	15	plastid	99.9463
Solyc01g108650.2.1	Unknown Protein (AHRD V1)	S	5	Y	none	plastid	6	PM	99.5518
Solyc01g108660.2.1	N-acetyl-gamma-glutamyl-phosphate reductase (AHRD V1 ***- A7WPL0_TOBAC); contains Interpro domain(s) IPR000706 N-acetyl-gamma-glutamyl-phosphate reductase	M	5	-	plastid	plastid	9	M	80.6598
Solyc01g108680.2.1	Hydrolase alpha/beta fold family protein (AHRD V1 **-- D7LG04_ARALY); contains Interpro domain(s) IPR000073 Alpha/beta hydrolase fold-1	-	3	-	none	plastid	2	plastid	44.5503
Solyc01g108910.2.1	COSII_At2g15890 (Fragment) (AHRD V1 *-*- C0KFD9_9SOLN)	plastid	2	Y	plastid	plastid	17	plastid	65.3148
Solyc01g108930.2.1	B3 domain-containing protein Os03g0622200 (AHRD V1 ***- Y3222_ORYSJ); contains Interpro domain(s) IPR003340 Transcriptional factor B3	-	5	-	possibly plastid	not plastid	0	N	99.1506
Solyc01g108950.1.1	B3 domain-containing protein Os11g0197600 (AHRD V1 *-*- Y1176_ORYSJ); contains Interpro domain(s) IPR003340 Transcriptional factor B3	-	4	Y	none	plastid	12	N	99.9566
Solyc01g108960.1.1	Unknown Protein (AHRD V1)	M	3	Y	possibly M	plastid	10	EX	98.7949
Solyc01g108990.2.1	Unknown Protein (AHRD V1)	M	2	Y	possibly M	plastid	17	C	65.8579
Solyc01g109040.2.1	Plastoquinol-plastocyanin reductase (AHRD V1 **-* B6SRD7_MAIZE); contains Interpro domain(s) IPR012595 PetM of cytochrome b6/f complex subunit 7	plastid	2	Y	plastid	plastid	7	plastid	70.1589
Solyc01g109110.2.1	Guanine nucleotide-binding protein alpha-1 subunit (AHRD V1 *-*- B6TWS6_MAIZE); contains Interpro domain(s) IPR001019 Guanine nucleotide binding protein (G-protein), alpha subunit	-	1	-	possibly plastid	plastid	2	C	99.9092
Solyc01g109150.2.1	cytochrome P450	-	3	-	none	plastid	3	plastid	47.7198
Solyc01g109200.2.1	RING finger protein (AHRD V1 *-*- C6EUD3_SOYBN); contains Interpro domain(s) IPR018957 Zinc finger, C3HC4 RING-type	M	4	-	M	plastid	9	G	39.8872
Solyc01g109300.2.1	4-hydroxy-3-methylbut-2-enyl diphosphate reductase (AHRD V1 ***- A2TGW4_9LAMI); contains Interpro domain(s) IPR003451 LytB protein	plastid	2	Y	plastid	plastid	3	plastid	95.139
Solyc01g109330.2.1	Cytochrome c biogenesis protein ccsB (AHRD V1 *-*- D8G1N6_9CYAN); contains Interpro domain(s) IPR007816 ResB-like	-	5	Y	none	not plastid	0	P	50.9898
Solyc01g109420.2.1	Flavoprotein wrbA (AHRD V1 ***- B6SPB2_MAIZE); contains Interpro domain(s) IPR010089 Flavoprotein WrbA	-	4	-	none	plastid	3	plastid	67.173
Solyc01g109510.2.1	Subunit of the SWI/SNF chromatin remodeling complex (AHRD V1 *-*- C4QY27_PIplastidG); contains Interpro domain(s) IPR007526 SWIRM	-	4	Y	none	not plastid	0	N	99.9941
Solyc01g109530.2.1	Receptor like kinase, RLK	plastid	2	Y	none	plastid	2	N	65.3033
Solyc01g109550.2.1	Mitochondrial transcription termination factor (Fragment) (AHRD V1 *--- C6FB12_PSEMZ); contains Interpro domain(s) IPR003690 Mitochodrial transcription termination factor-related	M	3	Y	M	plastid	15	C	69.6292
Solyc01g109590.2.1	Receptor-like protein kinase (AHRD V1 ***- Q9LYS5_ARATH); contains Interpro domain(s) IPR002290 Serine/threonine protein kinase	-	5	Y	none	plastid	12	PM	97.889
Solyc01g109620.2.1	NADH-quinone oxidoreductase subunit I (AHRD V1 **** D5BPB0_PUNMI); contains Interpro domain(s) IPR001450 4Fe-4S ferredoxin, iron-sulphur binding, subgroup	M	1	Y	M	plastid	9	M	99.9997
Solyc01g109650.2.1	Receptor like kinase, RLK	S	2	Y	ER	not plastid	0	PM	99.8018
Solyc01g109690.1.1	Myb family transcription factor (Fragment) (AHRD V1 **** D7KSM0_ARALY); contains Interpro domain(s) IPR017884 SANT, eukarya	plastid	5	-	none	not plastid	0	N	99.9913
Solyc01g109760.2.1	Nodulin family protein (AHRD V1 ***- D7MWD3_ARALY); contains Interpro domain(s) IPR010658 Nodulin-like	-	5	Y	none	not plastid	0	PM	99.3848
Solyc01g109790.2.1	Glucose-1-phosphate adenylyltransferase (AHRD V1 **** Q15I66_SOLLC); contains Interpro domain(s) IPR011831 Glucose-1-phosphate adenylyltransferase IPR005836 ADP-glucose pyrophosphorylase, conserved site	-	3	-	none	plastid	7	plastid	99.955
Solyc01g109800.2.1	Genomic DNA chromosome 5 TAC clone K1F13 (AHRD V1 *-*- Q9FJZ5_ARATH)	-	5	-	possibly plastid	not plastid	0	G	96.9152
Solyc01g109820.1.1	Zinc finger (C3HC4 RING finger) protein (AHRD V1 *-*- B9QDQ8_TOXGO); contains Interpro domain(s) IPR001841 Zinc finger, RING-type	plastid	2	Y	possibly plastid	plastid	2	plastid	87.5212
Solyc01g109850.2.1	Diaminopimelate decarboxylase (AHRD V1 **** D2DKE7_SOYBN); contains Interpro domain(s) IPR002986 Diaminopimelate decarboxylase	plastid	1	Y	plastid	plastid	12	plastid	92.4548
Solyc01g109880.2.1	BZIP transcription factor (AHRD V1 ***- C0KYN1_SOLLC); contains Interpro domain(s) IPR011700 Basic leucine zipper	plastid	3	Y	none	not plastid	0	N	99.9993
Solyc01g109900.2.1	Unknown Protein (AHRD V1)	S	1	Y	ER	plastid	4	EX	97.8688
Solyc01g109910.2.1	AT2G21500 protein (Fragment) (AHRD V1 **-- B9DHX0_ARATH); contains Interpro domain(s) IPR001841 Zinc finger, RING-type	plastid	5	-	none	not plastid	0	C	58.3827
Solyc01g109930.2.1	Inositol monophosphatase family protein (AHRD V1 **** D7MGB6_ARALY); contains Interpro domain(s) IPR011809 Histidinol-phosphate phosphatase, putative, inositol monophosphatase	plastid	2	Y	plastid	plastid	14	C	58.4595
Solyc01g109950.2.1	Pto-like, Serine/threonine kinase protein, resistance protein	S	5	Y	possibly ER	not plastid	0	PM	98.9313
Solyc01g109980.2.1	BEL1-like homeodomain protein 6 (AHRD V1 *--- BLH6_ARATH); contains Interpro domain(s) IPR006563 POX	-	4	Y	none	not plastid	0	N	99.9995
Solyc01g109990.2.1	RNA-binding protein 28 (AHRD V1 *--- B0X2T7_CULQU); contains Interpro domain(s) IPR012677 Nucleotide-binding, alpha-beta plait	-	5	Y	none	not plastid	0	N	95.626
Solyc01g110010.2.1	Pentatricopeptide repeat protein (AHRD V1 ***- Q6PRD0_ORYSJ); contains Interpro domain(s) IPR002885 Pentatricopeptide repeat	plastid	2	-	none	plastid	10	C	96.2397
Solyc01g110130.2.1	DNA replication licensing factor (AHRD V1 ***- Q2TZM7_ASPOR); contains Interpro domain(s) IPR008047 MCM protein 4	plastid	2	Y	none	plastid	2	N	99.9996
Solyc01g110160.2.1	Chromosome 11 contig 1 DNA sequence (AHRD V1 ***- Q00YQ5_OSTTA)	M	4	Y	M	plastid	15	M	79.6529
Solyc01g110190.2.1	Kinesin like protein (AHRD V1 ***- Q9SVI8_ARATH); contains Interpro domain(s) IPR001752 Kinesin, motor region	plastid	4	Y	plastid	plastid	8	C	99.9966
Solyc01g110200.1.1	MEI2-like RNA binding protein (AHRD V1 *--- Q652K6_ORYSJ); contains Interpro domain(s) IPR007201 RNA recognition motif 2	plastid	2	Y	possibly plastid	plastid	4	C	71.1398
Solyc01g110210.1.1	Terminal ear1-like 2 protein (AHRD V1 *--- A9XIW7_POPCN); contains Interpro domain(s) IPR007201 RNA recognition motif 2	plastid	3	-	none	not plastid	0	N	58.8743
Solyc01g110270.2.1	Crs1/yhby domain containing protein (Fragment) (AHRD V1 *-*- A6N061_ORYSI); contains Interpro domain(s) IPR001890 RNA-binding, CRM domain	plastid	4	Y	ER	plastid	9	M	95.6762
Solyc01g110280.2.1	DNA-damage-inducible protein F (AHRD V1 **-- B4V9L8_9ACTO); contains Interpro domain(s) IPR002528 Multi antimicrobial extrusion protein MatE	plastid	3	-	possibly plastid	not plastid	0	P	89.8583
Solyc01g110360.2.1	Fructose-bisphosphate aldolase (AHRD V1 ***- B0FPD8_SOLTU); contains Interpro domain(s) IPR000741 Fructose-bisphosphate aldolase, class-I	plastid	2	Y	plastid	plastid	8	plastid	75.4675
Solyc01g110400.2.1	Unknown Protein (AHRD V1)	M	2	-	possibly M	plastid	7	C	58.6842
Solyc01g110480.2.1	BZIP transcription factor family protein expressed (AHRD V1 *-*- Q8LN44_ORYSJ); contains Interpro domain(s) IPR011616 bZIP transcription factor, bZIP-1	-	3	Y	none	not plastid	0	N	99.9963
Solyc01g110520.2.1	Glucosamine--fructose-6-phosphate aminotransferase (AHRD V1 *-*- GLMS_METKA); contains Interpro domain(s) IPR005854 Amidophosphoribosyl transferase	plastid	2	Y	plastid	plastid	13	plastid	99.9331
Solyc01g110530.2.1	Peptidyl-prolyl cis-trans isomerase C (AHRD V1 *--* PPIC_ECOLI); contains Interpro domain(s) IPR000297 Peptidyl-prolyl cis-trans isomerase, PpiC-type	plastid	5	-	none	plastid	2	N	99.6579
Solyc01g110540.2.1	Unknown Protein (AHRD V1)	M	5	-	-	plastid	9	plastid	96.749
Solyc01g110550.2.1	Ribosome-binding factor A (AHRD V1 **** B6TDG2_MAIZE); contains Interpro domain(s) IPR000238 Ribosome-binding factor A	plastid	4	Y	none	plastid	6	plastid	64.7391
Solyc01g110560.2.1	Auxin responsive SAUR protein (AHRD V1 *-*- Q1SN26_MEDTR); contains Interpro domain(s) IPR003676 Auxin responsive SAUR protein	plastid	5	-	none	plastid	6	C	70.2665
Solyc01g110640.1.1	Unknown Protein (AHRD V1)	plastid	5	-	none	plastid	4	N	55.1528
Solyc01g111020.2.1	Pentatricopeptide repeat-containing protein (AHRD V1 *-*- D7L4E9_ARALY); contains Interpro domain(s) IPR002885 Pentatricopeptide repeat	plastid	2	Y	plastid	plastid	13	C	72.975
Solyc01g111060.2.1	5&apos-methylthioadenosine/S-adenosylhomocysteine nucleosidase (AHRD V1 **** D4FIY6_STAEP); contains Interpro domain(s) IPR018017 Nucleoside phosphorylase, family 1	-	3	-	possibly plastid	plastid	6	C	93.268
Solyc01g111120.2.1	Triosephosphate isomerase (AHRD V1 **** D6N3G7_GOSHI); contains Interpro domain(s) IPR000652 Triosephosphate isomerase	plastid	1	Y	plastid	plastid	11	plastid	99.9485
Solyc01g111170.2.1	Peptidyl-prolyl cis-trans isomerase (AHRD V1 ***- Q9XF12_SOLTU); contains Interpro domain(s) IPR002130 Peptidyl-prolyl cis-trans isomerase, cyclophilin-type	-	3	-	none	plastid	5	plastid	63.0271
Solyc01g111190.2.1	Magnesium transporter NIPA2 (AHRD V1 *-*- NIPA2_BOVIN); contains Interpro domain(s) IPR008521 Protein of unknown function DUF803	M	4	Y	possibly M	plastid	3	M	92.6997
Solyc01g111330.2.1	Thaumatin-like protein (AHRD V1 ***- Q9STX6_ARATH); contains Interpro domain(s) IPR001938 Thaumatin, pathogenesis-related	S	1	Y	ER	plastid	10	EX	98.8199
Solyc01g111350.2.1	Nodulin family protein (AHRD V1 ***- D7MDH3_ARALY); contains Interpro domain(s) IPR010658 Nodulin-like	S	3	Y	none	not plastid	0	PM	99.4713
Solyc01g111380.2.1	Actin depolymerizing factor 5 (AHRD V1 **** A1XJ48_GOSHI); contains Interpro domain(s) IPR002108 Actin-binding, cofilin/tropomyosin type	-	2	-	possibly plastid	plastid	7	C	99.9825
Solyc01g111440.2.1	Senescence-associated protein 12 (AHRD V1 *-*- O81657_HEMSP); contains Interpro domain(s) IPR009686 Senescence-associated	plastid	4	-	none	plastid	4	C	63.4962
Solyc01g111470.2.1	Pentatricopeptide repeat-containing protein (AHRD V1 ***- D7L879_ARALY); contains Interpro domain(s) IPR002885 Pentatricopeptide repeat	plastid	4	Y	possibly plastid	plastid	10	plastid	89.4881
Solyc01g111490.1.1	Unknown Protein (AHRD V1); contains Interpro domain(s) IPR010666 Zinc finger, GRF-type	plastid	4	Y	plastid	plastid	11	plastid	95.4397
Solyc01g111530.2.1	Ubiquitin-protein ligase 4 (AHRD V1 *-** D7M7X1_ARALY); contains Interpro domain(s) IPR000569 HECT	plastid	2	Y	possibly plastid	plastid	1	C	94.3031
Solyc01g111610.2.1	Protein binding protein (AHRD V1 **-- D7L0L7_ARALY)	-	4	Y	none	not plastid	0	C	64.6706
Solyc01g111620.2.1	AT4G35080-like protein (Fragment) (AHRD V1 *--- D6PRD4_9BRAS); contains Interpro domain(s) IPR011541 Nickel/cobalt transporter, high-affinity	plastid	4	Y	plastid	plastid	2	plastid	77.2931
Solyc01g111720.2.1	Translation initiation factor IF-3 (AHRD V1 *-*- D4YMH3_9MICO); contains Interpro domain(s) IPR001288 Translation initiation factor 3	M	4	Y	possibly M	plastid	4	N	77.3717
Solyc01g111750.2.1	Heat shock protein DnaJ domain protein (AHRD V1 *--- B7K9K5_CYAP7)	plastid	1	Y	plastid	plastid	11	plastid	93.072
Solyc01g111790.1.1	Serine/threonine-protein phosphatase 2A regulatory subunit delta 1 isoform (AHRD V1 ***- Q0CAR1_ASPTN); contains Interpro domain(s) IPR002554 Protein phosphatase 2A, regulatory B subunit, B56	plastid	3	Y	none	plastid	3	M	28.5408
Solyc01g111870.1.1	Serine/threonine-protein kinase (AHRD V1 *-** D2V0W7_NAEGR); contains Interpro domain(s) IPR000403 Phosphatidylinositol 3- and 4-kinase, catalytic	-	4	-	possibly plastid	not plastid	0	C	89.2645
Solyc01g111930.2.1	Rop guanine nucleotide exchange factor 1 (AHRD V1 **-* ROGF1_ARATH); contains Interpro domain(s) IPR005512 Rop nucleotide exchanger, PRONE	plastid	4	-	none	not plastid	0	N	65.3311
Solyc01g111950.2.1	Receptor-like kinase (AHRD V1 *-*- A7VM42_MARPO); contains Interpro domain(s) IPR002290 Serine/threonine protein kinase	plastid	3	Y	possibly M	plastid	4	plastid	77.095
Solyc01g111980.2.1	Lysine/histidine transporter (AHRD V1 **** B9HR02_POPTR); contains Interpro domain(s) IPR013057 Amino acid transporter, transmembrane	-	5	Y	none	not plastid	0	PM	63.9469
Solyc01g111990.2.1	Alanyl-tRNA synthetase (AHRD V1 **** Q9FFC7_ARATH); contains Interpro domain(s) IPR002318 Alanyl-tRNA synthetase, class IIc	-	5	Y	possibly plastid	plastid	17	C	99.1113
Solyc01g112000.2.1	Expansin-like protein (AHRD V1 ***- A7X331_SOLLC); contains Interpro domain(s) IPR007112 Expansin 45, endoglucanase-like IPR007117 Pollen allergen/expansin, C-terminal	S	3	Y	ER	plastid	10	EX	97.2188
Solyc01g112040.2.1	Unknown Protein (AHRD V1)	plastid	3	Y	none	plastid	3	N	74.6169
Solyc01g112060.2.1	NmrA family protein (AHRD V1 **-- B2J8Q2_NOSP7); contains Interpro domain(s) IPR016040 NAD(P)-binding domain	plastid	2	Y	plastid	plastid	13	plastid	99.5092
Solyc01g112090.2.1	MATE efflux family protein expressed (AHRD V1 **-- Q2QYU0_ORYSJ); contains Interpro domain(s) IPR002528 Multi antimicrobial extrusion protein MatE	plastid	5	-	possibly plastid	plastid	2	plastid	90.0863
Solyc01g112180.2.1	Unknown Protein (AHRD V1)	plastid	4	Y	none	plastid	8	C	37.8086
Solyc01g112220.2.1	Serine/threonine protein kinase-like (AHRD V1 **** Q5XWQ1_SOLTU); contains Interpro domain(s) IPR002290 Serine/threonine protein kinase	plastid	1	Y	possibly plastid	plastid	2	plastid	98.7363
Solyc01g112230.2.1	PGPS/NH21 (AHRD V1 **-- Q9ZTM1_PETHY); contains Interpro domain(s) IPR000316 Plant EC metallothionein-like protein, family 15	plastid	4	-	none	plastid	4	C	82.5022
Solyc01g112260.2.1	Unknown Protein (AHRD V1)	plastid	4	Y	none	plastid	4	N	82.3457
Solyc01g112290.2.1	Glutamyl-tRNA synthetase (AHRD V1 ***- Q52JJ5_NICBE); contains Interpro domain(s) IPR004527 Glutamyl-tRNA synthetase, class Ic, bacterial/mitochondrial	plastid	5	Y	plastid	plastid	14	M	54.0951
Solyc01g112300.2.1	Chloride channel E (AHRD V1 ***- D3YP04_THEHA); contains Interpro domain(s) IPR001807 Chloride channel, voltage gated	plastid	1	Y	plastid	plastid	13	plastid	99.876
Solyc01g112330.1.1	ARID/BRIGHT DNA-binding domain-containing protein (AHRD V1 ***- D7L9D8_ARALY)	-	3	-	possibly plastid	not plastid	0	C	98.1406
Solyc01g112340.2.1	Guanine nucleotide exchange family protein (AHRD V1 ***- D7MEW8_ARALY)	-	4	-	none	plastid	9	plastid	96.8779
Solyc01g112350.2.1	Sec7 guanine nucleotide exchange factor (AHRD V1 *--* B0CY77_LACBS); contains Interpro domain(s) IPR000904 SEC7-like	S	1	Y	ER	not plastid	0	G	50.5723
Solyc01g112400.1.1	Unknown Protein (AHRD V1)	plastid	5	-	none	plastid	4	N	99.0745
Solyc02g005050.2.1	Unknown Protein (AHRD V1)	plastid	5	-	none	not plastid	0	N	73.0884
Solyc02g005160.1.1	Gag-Pol polyprotein (AHRD V1 ***- B8YLY4_MEDTR)	-	5	-	possibly plastid	plastid	12	plastid	98.279
Solyc02g005200.2.1	PsaB translation factor (Fragment) (AHRD V1 ***- A4S2E4_OSTLU); contains Interpro domain(s) IPR009472 Protein of unknown function DUF1092	plastid	3	Y	plastid	plastid	6	plastid	31.6776
Solyc02g005210.2.1	plastidLD51 protein required for cyt b6 assembly (AHRD V1 **-- D8LHH2_ECTSI)	plastid	5	Y	plastid	plastid	11	PM	26.3649
Solyc02g005270.1.1	Unknown Protein (AHRD V1)	M	4	Y	M	plastid	13	C	72.983
Solyc02g005330.1.1	Unknown Protein (AHRD V1)	S	3	-	plastid	plastid	6	plastid	77.1541
Solyc02g005350.2.1	Succinyl-CoA ligase (AHRD V1 ***- B9RL91_RICCO); contains Interpro domain(s) IPR005810 Succinyl-CoA ligase, alpha subunit	M	4	Y	possibly M	plastid	16	M	99.9121
Solyc02g005520.2.1	Unknown Protein (AHRD V1)	M	3	Y	M	plastid	10	M	89.8979
Solyc02g005570.1.1	Unknown Protein (AHRD V1)	M	5	-	possibly plastid	plastid	11	C	90.1446
Solyc02g011740.1.1	NAD(P)H-quinone oxidoreductase chain 4, chloroplastic (AHRD V1 ***- NU4C_TOBAC)	S	5	Y	possibly plastid	plastid	10	V	76.6918
Solyc02g011870.1.1	Ycf1 (Fragment) (AHRD V1 ***- A6Y9X6_HAMJA); contains Interpro domain(s) IPR008896 Ycf1	S	1	Y	ER	plastid	4	EX	99.7908
Solyc02g014120.1.1	HAT family dimerisation domain containing protein expressed (AHRD V1 ***- Q10BC8_ORYSJ); contains Interpro domain(s) IPR007021 Protein of unknown function DUF659	M	4	Y	M	plastid	6	M	83.9335
Solyc02g014150.2.1	Photosystem II stability/assembly factor Ycf48-like protein (AHRD V1 **-- B0C6T3_ACAM1); contains Interpro domain(s) IPR016705 Photosystem II stability/assembly factor, HCF136	plastid	2	Y	none	plastid	8	plastid	94.7043
Solyc02g014160.1.1	Unknown Protein (AHRD V1)	plastid	5	Y	none	plastid	13	plastid	55.5695
Solyc02g014170.2.1	Baculoviral IAP repeat-containing 2 (AHRD V1 *--- Q6P6S1_RAT); contains Interpro domain(s) IPR018957 Zinc finger, C3HC4 RING-type	S	1	Y	possibly ER	plastid	5	G	94.1118
Solyc02g014200.1.1	Ulp1 protease family C-terminal catalytic domain containing protein (AHRD V1 *-*- Q60D46_SOLDE)	plastid	3	Y	none	plastid	2	N	67.2309
Solyc02g014230.1.1	Lrr, resistance protein fragment	-	5	Y	possibly ER	plastid	2	V	48.1981
Solyc02g014320.1.1	NAK-type protein kinase (AHRD V1 *-*- Q1W203_TOBAC)	plastid	4	-	none	plastid	6	PM	39.5403
Solyc02g014550.1.1	Unknown Protein (AHRD V1)	S	2	-	possibly plastid	plastid	3	G	79.2703
Solyc02g014560.2.1	Calcium binding atopy-related autoantigen 1 (AHRD V1 **-* B6SL16_MAIZE); contains Interpro domain(s) IPR011992 EF-Hand type	plastid	4	Y	possibly M	plastid	4	M	77.8974
Solyc02g014570.1.1	Unknown Protein (AHRD V1)	M	5	-	possibly plastid	plastid	7	M	86.0511
Solyc02g014600.1.1	Unknown Protein (AHRD V1)	M	4	Y	possibly plastid	plastid	8	plastid	95.1366
Solyc02g014620.1.1	Unknown Protein (AHRD V1)	plastid	4	Y	possibly M	plastid	9	M	88.9544
Solyc02g014630.1.1	Unknown Protein (AHRD V1)	plastid	5	Y	none	plastid	6	C	56.0113
Solyc02g014860.2.1	Chaperone protein DnaJ (AHRD V1 *-*- D2QAE1_BIFDB); contains Interpro domain(s) IPR003095 Heat shock protein DnaJ	plastid	4	Y	possibly plastid	plastid	18	P	42.9232
Solyc02g020890.2.1	Transmembrane protein 53 (AHRD V1 *--- B5X6E4_SALSA); contains Interpro domain(s) IPR008547 Protein of unknown function DUF829, transmembrane 53	-	5	-	none	plastid	9	plastid	81.9243
Solyc02g020910.2.1	Myosin-like protein (AHRD V1 ***- Q9LHE9_ARATH); contains Interpro domain(s) IPR001609 Myosin head, motor region	M	5	Y	none	not plastid	0	C	99.9486
Solyc02g020940.2.1	Glyceraldehyde-3-phosphate dehydrogenase (AHRD V1 **** D7UNZ5_BRARC); contains Interpro domain(s) IPR000173 Glyceraldehyde 3-phosphate dehydrogenase	plastid	3	Y	plastid	plastid	17	plastid	92.4565
Solyc02g020980.2.1	4-alpha-glucanotransferase (AHRD V1 **** Q6R608_SOLTU); contains Interpro domain(s) IPR003385 Glycoside hydrolase, family 77	M	2	-	possibly M	plastid	6	plastid	41.2442
Solyc02g020990.2.1	Unknown Protein (AHRD V1)	plastid	2	Y	plastid	plastid	7	M	58.5038
Solyc02g021000.2.1	YGGT family conserved hypothetical integral membrane protein (AHRD V1 *-*- A4CQQ7_SYNPV); contains Interpro domain(s) IPR003425 Protein of unknown function YGGT	plastid	3	Y	possibly M	plastid	11	plastid	99.8177
Solyc02g021050.2.1	Predicted metal-binding possibly nucleic acid-binding protein (AHRD V1 *-*- D4LSP3_9FIRM); contains Interpro domain(s) IPR003772 Protein of unknown function DUF177	plastid	5	-	none	plastid	11	C	85.4461
Solyc02g021060.2.1	Uracil DNA glycosylase family protein (AHRD V1 **** D7L931_ARALY); contains Interpro domain(s) IPR002043 Uracil-DNA glycosylase	plastid	2	Y	possibly M	plastid	4	N	84.4342
Solyc02g021140.2.1	Superoxide dismutase (AHRD V1 ***- B9S4J6_RICCO); contains Interpro domain(s) IPR001189 Manganese/iron superoxide dismutase	M	5	-	none	plastid	11	plastid	93.1221
Solyc02g021170.1.1	Unknown Protein (AHRD V1)	plastid	2	Y	none	plastid	6	C	88.978
Solyc02g021220.1.1	Subtilisin-like protease (AHRD V1 **-- A9XG40_TOBAC); contains Interpro domain(s) IPR015500 Peptidase S8, subtilisin-related	S	1	Y	ER	plastid	10	V	69.4477
Solyc02g021270.2.1	Unknown Protein (AHRD V1)	S	3	-	-	plastid	6	plastid	30.857
Solyc02g021280.1.1	Pentatricopeptide repeat-containing protein (AHRD V1 ***- D7LLV1_ARALY); contains Interpro domain(s) IPR002885 Pentatricopeptide repeat	S	4	Y	ER	plastid	6	ER	78.6577
Solyc02g021380.1.1	Unknown Protein (AHRD V1)	plastid	5	-	possibly plastid	plastid	12	N	80.9631
Solyc02g021430.1.1	Mitochondrial transcription termination factor (Fragment) (AHRD V1 *--- C6FB12_PSEMZ); contains Interpro domain(s) IPR003690 Mitochodrial transcription termination factor-related	plastid	2	Y	possibly plastid	not plastid	0	plastid	99.3063
Solyc02g021660.1.1	Receptor-like kinase (AHRD V1 *-*- C6ZRM1_SOYBN); contains Interpro domain(s) IPR001245 Tyrosine protein kinase	M	5	-	none	plastid	6	plastid	99.979
Solyc02g021700.2.1	Alpha N-terminal protein methyltransferase 1 (AHRD V1 **** NTM1_ARATH); contains Interpro domain(s) IPR008576 Protein of unknown function DUF858, methyltransferase-like	plastid	4	Y	possibly M	plastid	16	M	96.5944
Solyc02g022830.2.1	DNA primase/helicase (AHRD V1 **-- C9KX74_9BACE); contains Interpro domain(s) IPR006154 Toprim domain, subgroup	M	3	Y	M	plastid	11	M	89.0458
Solyc02g022910.2.1	Fatty acid hydroxylase family protein expressed (AHRD V1 **** Q9AY73_ORYSJ); contains Interpro domain(s) IPR006694 Fatty acid hydroxylase	S	4	Y	none	plastid	5	PM	88.8001
Solyc02g022920.1.1	Ethylene-responsive nuclear protein (AHRD V1 ***- Q38MV1_SOLLC)	plastid	5	Y	none	not plastid	0	N	34.5355
Solyc02g023990.2.1	Short-chain dehydrogenase/reductase SDR (AHRD V1 **-- A1WVI4_HALHL); contains Interpro domain(s) IPR002347 Glucose/ribitol dehydrogenase	-	3	Y	none	not plastid	0	C	82.8992
Solyc02g024040.1.1	HAT family dimerization domain protein (AHRD V1 ***- D0UZH7_ORYSJ)	M	5	Y	none	plastid	5	plastid	92.4766
Solyc02g024050.2.1	Ferredoxin--NADP reductase (AHRD V1 ***- B9SB31_RICCO); contains Interpro domain(s) IPR012146 Ferredoxin--NADP reductase	plastid	1	Y	plastid	plastid	9	plastid	99.9991
Solyc02g030100.2.1	Vacuolar protein sorting-associated protein 54 (AHRD V1 ***- B0CS25_LACBS)	plastid	5	-	none	not plastid	0	plastid	40.8522
Solyc02g030290.1.1	Nbs, resistance protein fragment	-	5	-	plastid	plastid	5	C	84.9739
Solyc02g030350.1.1	Unknown Protein (AHRD V1)	-	5	Y	plastid	plastid	4	C	31.8944
Solyc02g030380.1.1	S glycoprotein (Fragment) (AHRD V1 ***- O23838_BRAOL); contains Interpro domain(s) IPR001480 Curculin-like (mannose-binding) lectin	-	5	Y	possibly plastid	plastid	8	C	91.0368
Solyc02g030540.1.1	Unknown Protein (AHRD V1)	plastid	4	Y	none	plastid	11	C	79.4369
Solyc02g031680.1.1	Unknown Protein (AHRD V1)	S	2	-	-	not plastid	0	plastid	62.2167
Solyc02g031730.1.1	Unknown Protein (AHRD V1)	plastid	3	Y	none	plastid	4	N	56.3681
Solyc02g031770.2.1	ATP synthase mitochondrial F1 complex assembly factor 1 (AHRD V1 **-- ATPF1_HUMAN); contains Interpro domain(s) IPR010591 ATP11	plastid	4	Y	M	plastid	11	plastid	98.227
Solyc02g031790.1.1	Receptor like kinase, RLK	plastid	5	-	none	plastid	2	PM	46.7179
Solyc02g031800.1.1	LRR receptor-like serine/threonine-protein kinase, RLP	plastid	4	Y	none	plastid	9	C	43.9091
Solyc02g031970.1.1	50S ribosomal protein L12-2 (AHRD V1 ***- B6SHT7_MAIZE); contains Interpro domain(s) IPR015608 Ribosomal protein L12, chloroplast	M	2	Y	M	plastid	11	M	72.9045
Solyc02g032230.1.1	Lrr, resistance protein fragment	-	5	-	possibly plastid	plastid	6	plastid	71.0507
Solyc02g032340.1.1	Zinc finger family protein (AHRD V1 *--- D7LUX5_ARALY); contains Interpro domain(s) IPR018957 Zinc finger, C3HC4 RING-type	M	4	Y	M	plastid	3	M	85.9794
Solyc02g032390.1.1	Unknown Protein (AHRD V1)	plastid	3	Y	none	not plastid	0	N	75.586
Solyc02g032440.1.1	Unknown Protein (AHRD V1)	M	3	Y	-	plastid	1	N	75.7233
Solyc02g032470.2.1	Unknown Protein (AHRD V1)	plastid	4	Y	none	not plastid	0	plastid	76.5028
Solyc02g032550.1.1	Ectonucleoside triphosphate diphosphohydrolase 6 (AHRD V1 **-- Q6YHK4_CAVPO); contains Interpro domain(s) IPR000407 Nucleoside phosphatase GDA1/CD39	-	3	-	possibly plastid	plastid	4	EX	53.667
Solyc02g032770.1.1	Unknown Protein (AHRD V1)	S	5	-	possibly plastid	plastid	9	V	68.8817
Solyc02g032780.1.1	Unknown Protein (AHRD V1)	plastid	4	-	none	not plastid	0	PM	45.7614
Solyc02g032860.2.1	Phosphoadenosine phosphosulfate reductase (AHRD V1 *-** A6EX37_9ALTE); contains Interpro domain(s) IPR004508 Thioredoxin-independent 5'-adenylylsulphate reductase	plastid	1	Y	plastid	plastid	14	plastid	99.9572
Solyc02g032870.2.1	5&apos;-tyrosyl-DNA phosphodiesterase (AHRD V1 *--- TDP2_BOVIN); contains Interpro domain(s) IPR005135 Endonuclease/exonuclease/phosphatase	plastid	3	Y	ER	plastid	11	V	99.1914
Solyc02g032910.1.1	Glycine rich protein (AHRD V1 *-*- Q43498_SOLLC)	S	4	-	ER	plastid	4	PM	90.7427
Solyc02g032960.2.1	Cell division protease FtsH homolog (AHRD V1 *--- C5NVJ0_9BACL); contains Interpro domain(s) IPR003959 ATPase, AAA-type, core	plastid	1	Y	plastid	plastid	12	plastid	92.4059
Solyc02g033020.1.1	Unknown Protein (AHRD V1)	plastid	5	-	none	not plastid	0	N	85.2003
Solyc02g033040.2.1	F-box family protein (AHRD V1 ***- B9HCS6_POPTR); contains Interpro domain(s) IPR001810 Cyclin-like F-box	plastid	3	-	none	plastid	3	N	57.0531
Solyc02g033060.2.1	Chromosome 07 contig 1 DNA sequence (AHRD V1 ***- Q015I8_OSTTA)	plastid	5	Y	plastid	plastid	12	plastid	99.6503
Solyc02g036200.1.1	Zinc ion binding protein (AHRD V1 **** D7LPW1_ARALY); contains Interpro domain(s) IPR006734 Protein of unknown function DUF597	plastid	2	-	none	not plastid	0	N	99.9517
Solyc02g036290.2.1	Malonyl-CoA decarboxylase like protein (AHRD V1 ***- Q7Y1Z8_ARATH); contains Interpro domain(s) IPR007956 Malonyl-CoA decarboxylase	plastid	4	-	none	plastid	2	P	38.171
Solyc02g036310.2.1	Malonyl-CoA decarboxylase like protein (AHRD V1 ***- Q7Y1Z8_ARATH)	M	2	Y	M	plastid	4	M	89.2415
Solyc02g036340.2.1	AAA family ATPase (AHRD V1 *-*- Q8F4H4_LEPIN)	M	2	Y	M	plastid	12	M	32.7776
Solyc02g036450.2.1	Ras-related protein Rab-5C (AHRD V1 ***- C1BU54_9MAXI); contains Interpro domain(s) IPR015599 Rab5-related	-	5	Y	none	plastid	10	C	99.8932
Solyc02g036470.2.1	Drug/metabolite transporter (AHRD V1 ***- B4TLZ1_SALSV); contains Interpro domain(s) IPR000620 Protein of unknown function DUF6, transmembrane	plastid	1	Y	plastid	plastid	9	plastid	99.9595
Solyc02g036480.1.1	Harpin-induced protein-like (Fragment) (AHRD V1 **-- D2CFH8_COFAR); contains Interpro domain(s) IPR010847 Harpin-induced 1	plastid	5	-	none	not plastid	0	P	66.4359
Solyc02g037490.1.1	Acyl-CoA synthetase/AMP-acid ligase II (AHRD V1 **** Q2W3Z0_MAGSA); contains Interpro domain(s) IPR000873 AMP-dependent synthetase and ligase	-	3	Y	none	plastid	9	P	44.9256
Solyc02g037500.1.1	Unknown Protein (AHRD V1)	M	4	Y	possibly plastid	plastid	2	C	57.4246
Solyc02g038720.1.1	Acyl carrier protein (AHRD V1 ***- B9RR02_RICCO); contains Interpro domain(s) IPR003231 Acyl carrier protein (Aplastid)	plastid	1	Y	plastid	plastid	14	plastid	75.7589
Solyc02g038770.1.1	RING finger protein 44 (AHRD V1 *--- RNF44_DANRE); contains Interpro domain(s) IPR018957 Zinc finger, C3HC4 RING-type	plastid	3	-	none	plastid	2	C	94.2667
Solyc02g043820.1.1	Unknown Protein (AHRD V1)	-	4	Y	none	not plastid	0	N	98.1143
Solyc02g043840.1.1	HAT family dimerisation domain containing protein (AHRD V1 ***- Q2R3V9_ORYSJ); contains Interpro domain(s) IPR007021 Protein of unknown function DUF659	M	5	Y	possibly plastid	plastid	9	plastid	77.9567
Solyc02g043930.1.1	Gag-Pol polyprotein (AHRD V1 ***- B8YLY7_LOTJA); contains Interpro domain(s) IPR001584 Integrase, catalytic core	plastid	5	-	none	plastid	2	N	98.4402
Solyc02g043940.1.1	Unknown Protein (AHRD V1)	plastid	5	-	none	plastid	3	EX	94.7811
Solyc02g044000.1.1	ABC transporter C family member 14 (AHRD V1 *-*- AB14C_ARATH); contains Interpro domain(s) IPR012340 Nucleic acid-binding, OB-fold	S	2	Y	none	plastid	3	G	33.4685
Solyc02g049070.2.1	Genomic DNA chromosome 5 P1 clone MAH20 (AHRD V1 **-- Q9FNN4_ARATH)	plastid	1	Y	plastid	plastid	14	plastid	99.3271
Solyc02g050130.1.1	Polyprotein (AHRD V1 **-- Q9SXQ4_ARATH)	plastid	3	Y	none	plastid	11	plastid	93.2006
Solyc02g050200.1.1	Breast cancer susceptibility protein 2b (AHRD V1 ***- Q7Y1C4_ARATH); contains Interpro domain(s) IPR015187 BRCA2, oligonucleotide/oligosaccharide-binding 1	-	5	-	possibly plastid	plastid	2	N	94.9458
Solyc02g050240.2.1	Oligopeptidase (Protease II) (AHRD V1 ***- A6EQV2_9BACT); contains Interpro domain(s) IPR002470 Peptidase S9A, prolyl oligopeptidase	plastid	3	Y	plastid	plastid	12	plastid	51.4525
Solyc02g055400.1.1	Unknown Protein (AHRD V1)	plastid	5	-	none	plastid	2	M	75.8444
Solyc02g055430.1.1	Unknown Protein (AHRD V1)	plastid	3	Y	none	not plastid	0	N	96.9031
Solyc02g055440.2.1	Genomic DNA chromosome 3 P1 clone MPN9 (AHRD V1 ***- Q9LT28_ARATH)	plastid	4	-	plastid	plastid	15	plastid	56.5398
Solyc02g055500.1.1	Purine permease family protein (AHRD V1 **-- D7MCV2_ARALY); contains Interpro domain(s) IPR004853 Protein of unknown function DUF250	plastid	5	-	none	plastid	4	plastid	84.0138
Solyc02g060560.1.1	Unknown Protein (AHRD V1)	plastid	4	-	none	plastid	1	N	86.5944
Solyc02g061660.1.1	Unknown Protein (AHRD V1)	plastid	5	-	none	plastid	2	N	85.7048
Solyc02g061740.1.1	AMP-dependent synthetase and ligase family protein (AHRD V1 ***- D7L9G8_ARALY); contains Interpro domain(s) IPR000873 AMP-dependent synthetase and ligase	-	5	-	none	plastid	6	plastid	35.8502
Solyc02g061760.2.1	Mate efflux family protein (AHRD V1 **-- D7LLI9_ARALY); contains Interpro domain(s) IPR002528 Multi antimicrobial extrusion protein MatE	plastid	5	Y	possibly M	plastid	9	PM	99.5671
Solyc02g061810.2.1	Palmitoyltransferase (AHRD V1 *-*- A6ZY88_YEAS7); contains Interpro domain(s) IPR001594 Zinc finger, DHHC-type	-	4	-	possibly plastid	plastid	1	PM	99.9289
Solyc02g061820.2.1	Ankyrin repeat domain 1 (AHRD V1 *--- B5AZT4_CRIGR); contains Interpro domain(s) IPR002110 Ankyrin	plastid	2	Y	possibly plastid	plastid	11	C	67.5401
Solyc02g061840.2.1	Nuclear SR-like RNA binding protein (AHRD V1 *--- A8JAT7_CHLRE); contains Interpro domain(s) IPR012677 Nucleotide-binding, alpha-beta plait	plastid	1	Y	possibly plastid	not plastid	0	N	99.9746
Solyc02g061860.1.1	Unknown Protein (AHRD V1)	plastid	4	-	none	not plastid	0	C	56.4508
Solyc02g061930.1.1	Polyprotein (AHRD V1 *-*- O49143_ARATH); contains Interpro domain(s) IPR013103 Reverse transcriptase, RNA-dependent DNA polymerase	-	5	-	possibly plastid	not plastid	0	N	95.7382
Solyc02g061960.2.1	La related protein-like (AHRD V1 *--- Q5NBG8_ORYSJ); contains Interpro domain(s) IPR006630 RNA-binding protein Lupus La	plastid	1	Y	none	plastid	8	N	99.9994
Solyc02g061990.2.1	Basic leucine zipper transcription factor (AHRD V1 **-* Q9FQ01_9ROSI)	plastid	2	Y	none	not plastid	0	N	99.9922
Solyc02g062100.2.1	Senescence-associated protein 12 (AHRD V1 *--- O81657_HEMSP); contains Interpro domain(s) IPR009686 Senescence-associated	plastid	4	Y	none	plastid	14	C	70.6549
Solyc02g062130.2.1	Ferredoxin--NADP reductase (AHRD V1 ***- D7MN04_ARALY); contains Interpro domain(s) IPR012146 Ferredoxin--NADP reductase	plastid	1	Y	plastid	plastid	11	plastid	99.9998
Solyc02g062150.1.1	Pectinesterase (AHRD V1 **** B7SIX2_9CONI); contains Interpro domain(s) IPR000070 Pectinesterase, catalytic	plastid	4	Y	ER	not plastid	0	EX	45.7912
Solyc02g062160.1.1	Chaperone protein dnaJ 11 (AHRD V1 *-*- B6SS19_MAIZE); contains Interpro domain(s) IPR001623 Heat shock protein DnaJ, N-terminal	plastid	2	Y	possibly plastid	plastid	4	C	86.0601
Solyc02g062260.1.1	Unknown Protein (AHRD V1)	-	5	Y	possibly M	not plastid	0	C	51.838
Solyc02g062270.2.1	Unknown Protein (AHRD V1)	plastid	4	Y	none	not plastid	0	N	99.3899
Solyc02g062340.2.1	Fructose-bisphosphate aldolase (AHRD V1 ***- Q9SXX4_NIplastidA); contains Interpro domain(s) IPR000741 Fructose-bisphosphate aldolase, class-I	plastid	2	Y	plastid	plastid	14	plastid	94.0636
Solyc02g062350.2.1	Heat shock protein DnaJ domain protein (AHRD V1 **-- D7DZS3_NOSA0)	plastid	2	Y	plastid	not plastid	0	PM	57.4174
Solyc02g062450.1.1	Unknown Protein (AHRD V1); contains Interpro domain(s) IPR010666 Zinc finger, GRF-type	plastid	5	Y	plastid	plastid	11	plastid	93.2072
Solyc02g062560.2.1	TIM-barrel enzyme family protein (AHRD V1 *--- C5JTT1_AJEDS); contains Interpro domain(s) IPR008322 Uncharacterised conserved protein Uplastid033271 IPR009215 TIM-barrel signal transduction protein, predicted IPR018087 Glycoside hydrolase, family 5, conserved site	plastid	2	Y	plastid	plastid	6	C	79.5459
Solyc02g062580.2.1	Dolichyldiphosphatase 1 (AHRD V1 *--- C1C1U9_9MAXI); contains Interpro domain(s) IPR000326 Phosphatidic acid phosphatase type 2/haloperoxidase	plastid	5	Y	possibly ER	plastid	4	PM	97.6693
Solyc02g062590.2.1	Galactinol synthase (AHRD V1 ***- C7G304_SOLLC); contains Interpro domain(s) IPR002495 Glycosyl transferase, family 8	S	4	-	none	plastid	3	plastid	71.8919
Solyc02g062610.2.1	Hydrolase alpha/beta fold family protein (AHRD V1 ***- D7MBG9_ARALY); contains Interpro domain(s) IPR000073 Alpha/beta hydrolase fold-1	plastid	4	Y	none	plastid	12	M	96.4638
Solyc02g062700.2.1	26S protease regulatory subunit 6A (AHRD V1 *--- PRS6A_YEAST); contains Interpro domain(s) IPR003959 ATPase, AAA-type, core	plastid	4	Y	possibly plastid	plastid	7	C	87.0127
Solyc02g062720.2.1	DNA-3-methyladenine glycosylase 1 (AHRD V1 ***- B6U6Y8_MAIZE); contains Interpro domain(s) IPR003265 HhH-GPD domain	plastid	2	Y	none	plastid	2	plastid	37.6852
Solyc02g062770.1.1	Late embryogenesis abundant protein (AHRD V1 *-*- Q3I3Y9_PICGL)	M	5	Y	possibly M	plastid	8	C	74.8864
Solyc02g062790.2.1	Receptor-like kinase (AHRD V1 *-** A7VM65_9VIRI); contains Interpro domain(s) IPR002290 Serine/threonine protein kinase	plastid	2	Y	none	not plastid	0	N	50.1119
Solyc02g062910.1.1	Pentatricopeptide repeat-containing protein (AHRD V1 ***- D7MBF2_ARALY); contains Interpro domain(s) IPR002885 Pentatricopeptide repeat	plastid	4	-	M	plastid	10	C	92.1252
Solyc02g062930.2.1	Unknown Protein (AHRD V1)	S	1	-	plastid	plastid	2	EX	91.0639
Solyc02g062970.2.1	Xaa-Pro aminopeptidase 2 (AHRD V1 ***- Q93X45_SOLLC); contains Interpro domain(s) IPR001131 Peptidase M24B, X-Pro dipeptidase/aminopeptidase P, conserved site IPR000994 Peptidase M24, structural domain	-	4	-	possibly plastid	plastid	9	plastid	40.2659
Solyc02g062990.1.1	Glucosyltransferase (AHRD V1 ***- A7M6J8_9ERIC); contains Interpro domain(s) IPR002213 UDP-glucuronosyl/UDP-glucosyltransferase	-	3	-	none	plastid	10	plastid	32.7414
Solyc02g063010.2.1	BES1/BZR1 homolog protein 2 (AHRD V1 **-- BEH2_ARATH); contains Interpro domain(s) IPR008540 BZR1, transcriptional repressor	plastid	5	-	none	not plastid	0	N	90.5461
Solyc02g063100.1.1	Unknown Protein (AHRD V1)	plastid	5	Y	none	plastid	1	M	92.2406
Solyc02g063110.1.1	Unknown Protein (AHRD V1)	-	5	Y	none	plastid	2	C	60.931
Solyc02g063150.2.1	Ribulose bisphosphate carboxylase small chain (AHRD V1 ***- Q84QE5_TOBAC); contains Interpro domain(s) IPR000894 Ribulose bisphosphate carboxylase, small chain	plastid	2	Y	plastid	plastid	14	plastid	100
Solyc02g063170.2.1	Homology to unknown gene (Fragment) (AHRD V1 *-*- Q01BV2_OSTTA)	plastid	3	Y	possibly M	plastid	12	plastid	99.8257
Solyc02g063190.2.1	UDP-N-acetylenolpyruvoylglucosamine reductase (AHRD V1 *-*- D1R942_9CHLA); contains Interpro domain(s) IPR006094 FAD linked oxidase, N-terminal	plastid	5	Y	plastid	plastid	10	plastid	97.4951
Solyc02g063230.1.1	At1g67050 (Fragment) (AHRD V1 ***- B0FU30_ARATH)	plastid	3	Y	none	not plastid	0	N	82.2008
Solyc02g063300.2.1	Unknown Protein (AHRD V1)	plastid	2	Y	possibly plastid	plastid	9	C	50.8517
Solyc02g063490.2.1	Malate dehydrogenase (AHRD V1 **** B9S7S1_RICCO); contains Interpro domain(s) IPR010097 Malate dehydrogenase, NAD-dependent, eukaryotes and gamma proteobacteria	plastid	4	-	none	plastid	15	P	76.345
Solyc02g063510.1.1	Unknown Protein (AHRD V1)	-	3	-	plastid	not plastid	0	plastid	73.0799
Solyc02g063530.2.1	Unknown Protein (AHRD V1)	plastid	4	Y	possibly plastid	plastid	8	plastid	93.9987
Solyc02g064550.2.1	C1orf93 homolog (AHRD V1 **-- C1C416_RANCA); contains Interpro domain(s) IPR012335 Thioredoxin fold	plastid	1	Y	plastid	plastid	14	plastid	99.4924
Solyc02g064570.1.1	Unknown Protein (AHRD V1); contains Interpro domain(s) IPR008889 VQ	plastid	3	-	plastid	not plastid	0	plastid	58.0951
Solyc02g064600.2.1	Unknown Protein (AHRD V1)	-	4	-	possibly plastid	not plastid	0	PM	70.8003
Solyc02g064620.2.1	Unknown Protein (AHRD V1)	-	4	-	possibly plastid	not plastid	0	PM	70.8003
Solyc02g064650.2.1	Adenylyl-sulfate kinase (AHRD V1 **** C6TL96_SOYBN); contains Interpro domain(s) IPR002891 Adenylylsulphate kinase, C-terminal	M	5	-	M	plastid	3	plastid	88.1612
Solyc02g064670.1.1	Ribosomal protein L26-like 1 (AHRD V1 ***- B7TJ03_PIG); contains Interpro domain(s) IPR005756 Ribosomal protein L26, eukaryotic/archaeal	M	4	Y	none	not plastid	0	C	93.2614
Solyc02g064700.2.1	Protein serine/threonine kinase (AHRD V1 **** D3B471_POLPA); contains Interpro domain(s) IPR002290 Serine/threonine protein kinase	plastid	5	Y	M	plastid	11	C	92.115
Solyc02g064750.2.1	Prolyl 4-hydroxylase alpha subunit-like protein (AHRD V1 ***- Q9LSI6_ARATH); contains Interpro domain(s) IPR006620 Prolyl 4-hydroxylase, alpha subunit	S	4	Y	ER	plastid	3	G	82.9423
Solyc02g064790.1.1	COBRA-like protein 4 (AHRD V1 ***- B6SST3_MAIZE)	S	5	-	possibly plastid	plastid	4	PM	46.2512
Solyc02g064880.1.1	Protein serine/threonine kinase (AHRD V1 **** D3BP85_POLPA); contains Interpro domain(s) IPR002290 Serine/threonine protein kinase	M	2	Y	M	not plastid	0	M	99.5704
Solyc02g064930.1.1	Serine/threonine-protein kinase 4 (AHRD V1 ***- STK4_XENLA); contains Interpro domain(s) IPR002290 Serine/threonine protein kinase	M	5	Y	possibly M	plastid	14	M	86.0691
Solyc02g064950.2.1	CBS domain-containing protein-like (AHRD V1 ***- B8AP73_ORYSI); contains Interpro domain(s) IPR000644 Cystathionine beta-synthase, core	plastid	2	Y	plastid	plastid	13	M	67.0689
Solyc02g064980.1.1	Protein serine/threonine kinase (AHRD V1 ***- D3BP85_POLPA); contains Interpro domain(s) IPR002290 Serine/threonine protein kinase	-	4	Y	none	not plastid	0	C	68.0752
Solyc02g065020.1.1	Unknown Protein (AHRD V1)	-	3	Y	none	plastid	1	N	98.34
Solyc02g065060.2.1	Short-chain dehydrogenase/reductase family protein (AHRD V1 **** D7LTG0_ARALY); contains Interpro domain(s) IPR002347 Glucose/ribitol dehydrogenase	M	5	-	possibly M	plastid	16	plastid	97.082
Solyc02g065080.2.1	2,3-bisphosphoglycerate-dependent phosphoglycerate mutase (AHRD V1 *-*- GPMA_METS4); contains Interpro domain(s) IPR013078 Phosphoglycerate mutase	plastid	5	-	none	plastid	2	C	99.6703
Solyc02g065110.2.1	Protein serine/threonine kinase (AHRD V1 *-*- D3BP85_POLPA); contains Interpro domain(s) IPR002290 Serine/threonine protein kinase	plastid	3	Y	possibly plastid	plastid	4	N	88.4996
Solyc02g065150.1.1	LOB domain family protein (AHRD V1 ***- D7LG10_ARALY); contains Interpro domain(s) IPR004883 Lateral organ boundaries, LOB	plastid	5	-	none	plastid	2	N	98.3187
Solyc02g065360.2.1	DUF647 domain-containing protein (AHRD V1 *--- C5GE92_AJEDR); contains Interpro domain(s) IPR006968 Protein of unknown function DUF647	plastid	5	-	none	plastid	6	plastid	62.6275
Solyc02g065400.2.1	Oxygen-evolving enhancer protein 1 of photosystem II (AHRD V1 ***- A8J0E4_CHLRE); contains Interpro domain(s) IPR002628 Photosystem II manganese-stabilizing protein PsbO	plastid	4	Y	plastid	plastid	13	plastid	99.9978
Solyc02g065420.2.1	UPF0497 membrane protein At3g50810 (AHRD V1 ***- U497K_ARATH); contains Interpro domain(s) IPR006702 Uncharacterised protein family UPF0497, trans-membrane plant	S	5	Y	none	plastid	12	EX	82.5447
Solyc02g065470.1.1	Pathogenesis-related protein (AHRD V1 ***- B3TLW3_ELAGV); contains Interpro domain(s) IPR001283 Allergen V5/Tpx-1 related	S	4	Y	ER	plastid	14	EX	97.9823
Solyc02g065480.2.1	Ternary complex factor MIP1 (AHRD V1 **-- B6UE27_MAIZE); contains Interpro domain(s) IPR006869 Protein of unknown function DUF547	M	4	-	possibly plastid	plastid	9	C	60.9754
Solyc02g065520.1.1	Receptor-like protein kinase 5 (AHRD V1 *-*- RLK5_ARATH); contains Interpro domain(s) IPR002290 Serine/threonine protein kinase	S	1	Y	ER	plastid	1	PM	88.5273
Solyc02g065550.2.1	Coiled-coil domain-containing protein 109A (AHRD V1 *--- C109A_MOUSE); contains Interpro domain(s) IPR006769 Protein of unknown function DUF607	plastid	5	Y	possibly M	plastid	12	M	98.1463
Solyc02g065560.1.1	Pentatricopeptide repeat-containing protein (AHRD V1 ***- D7LGC7_ARALY); contains Interpro domain(s) IPR002885 Pentatricopeptide repeat	plastid	4	-	none	plastid	21	C	72.02
Solyc02g065590.2.1	Alpha/beta hydrolase fold-3 (AHRD V1 *--- C8PY72_9GAMM); contains Interpro domain(s) IPR002018 Carboxylesterase, type B	-	5	Y	none	not plastid	0	P	55.026
Solyc02g065620.2.1	Zinc finger family protein (AHRD V1 **-- D7KV04_ARALY); contains Interpro domain(s) IPR001357 BRCT	plastid	3	-	none	plastid	1	N	99.7858
Solyc02g065630.2.1	Myosin-like protein (AHRD V1 *--- Q9C717_ARATH)	plastid	5	-	none	not plastid	0	plastid	66.4259
Solyc02g065800.1.1	Transcription factor CYCLOIDEA (Fragment) (AHRD V1 *-*- CYCLD_ANTML); contains Interpro domain(s) IPR005333 Transcription factor, Tplastid	plastid	2	Y	none	plastid	5	N	98.0812
Solyc02g066920.2.1	Genomic DNA chromosome 5 TAC clone K3 (AHRD V1 ***- Q9FL87_ARATH)	plastid	5	-	none	not plastid	0	N	72.3927
Solyc02g066930.2.1	RNA-binding protein (AHRD V1 *--* Q941H9_TOBAC); contains Interpro domain(s) IPR015465 RNA recognition motif, glycine rich protein	-	3	-	none	not plastid	0	plastid	76.9867
Solyc02g066940.2.1	Splicing factor -like RNA-binding domain protein (AHRD V1 *--* C7SB52_PLADU)	plastid	5	-	none	plastid	3	N	99.4895
Solyc02g066970.1.1	Unknown Protein (AHRD V1); contains Interpro domain(s) IPR001092 Basic helix-loop-helix dimerisation region bHLH	plastid	5	Y	possibly M	plastid	4	N	99.9907
Solyc02g066980.1.1	Targeting protein for Xklp2 containing protein expressed (AHRD V1 *-*- Q10Q22_ORYSJ); contains Interpro domain(s) IPR009675 Targeting for Xklp2	plastid	1	Y	none	not plastid	0	N	99.6221
Solyc02g067040.2.1	cDNA clone J075153F01 full insert sequence (AHRD V1 *--- B7F9A7_ORYSJ); contains Interpro domain(s) IPR009769 Protein of unknown function DUF1336	plastid	4	Y	possibly plastid	plastid	16	N	95.2507
Solyc02g067050.2.1	Uncharacterized ACR COG1678 family protein (AHRD V1 **-- B6SSQ6_MAIZE); contains Interpro domain(s) IPR003774 Protein of unknown function DUF179	plastid	4	Y	plastid	plastid	6	plastid	66.4864
Solyc02g067060.2.1	Glycosyltransferase (AHRD V1 ***- B9IK47_POPTR); contains Interpro domain(s) IPR002495 Glycosyl transferase, family 8	-	3	Y	none	plastid	6	G	99.9786
Solyc02g067100.2.1	Targeting protein for Xklp2 containing protein expressed (AHRD V1 *-*- Q10Q22_ORYSJ); contains Interpro domain(s) IPR009675 Targeting for Xklp2	plastid	2	Y	none	not plastid	0	N	99.3889
Solyc02g067180.2.1	Cystathionine gamma synthase (AHRD V1 ***- Q6R8F6_SOLLC); contains Interpro domain(s) IPR000277 Cys/Met metabolism, pyridoxal phosphate-dependent enzyme	plastid	3	-	plastid	plastid	8	plastid	99.8267
Solyc02g067200.2.1	Pentatricopeptide repeat-containing protein (AHRD V1 ***- D7M7B2_ARALY); contains Interpro domain(s) IPR002885 Pentatricopeptide repeat	M	4	Y	none	plastid	3	C	96.377
Solyc02g067360.2.1	Protease Do-like (S2 serine-type protease) (AHRD V1 **** Q7UQ70_RHOBA); contains Interpro domain(s) IPR001254 Peptidase S1 and S6, chymotrypsin/Hap	plastid	5	Y	plastid	plastid	12	C	69.4339
Solyc02g067480.2.1	Pyridine nucleotide-disulfide oxidoreductase (AHRD V1 **-* D3I8P7_9BACT); contains Interpro domain(s) IPR004792 HI0933-like protein	M	4	Y	none	plastid	7	M	33.6215
Solyc02g067530.2.1	Prolyl 4-hydroxylase alpha subunit-like protein (AHRD V1 ***- Q9LSI6_ARATH); contains Interpro domain(s) IPR006620 Prolyl 4-hydroxylase, alpha subunit	S	2	Y	ER	plastid	9	G	78.3139
Solyc02g067540.2.1	Methyltransferase (AHRD V1 *-*- B9LJG4_CHLSY); contains Interpro domain(s) IPR016065 Protein of unknown function methylase putative	plastid	2	Y	plastid	plastid	12	plastid	82.8898
Solyc02g067620.1.1	Zinc transporter like 1 (AHRD V1 *-*- Q9JKN2_MOUSE); contains Interpro domain(s) IPR002524 Cation efflux protein	M	5	Y	none	plastid	2	PM	99.2838
Solyc02g067660.2.1	Phytoalexin deficient 4 (Fragment) (AHRD V1 **-- B2BDV5_ARALY); contains Interpro domain(s) IPR002921 Lipase, class 3	-	5	-	possibly plastid	not plastid	0	plastid	55.6405
Solyc02g067680.1.1	RING finger protein (AHRD V1 ***- C6EUD3_SOYBN); contains Interpro domain(s) IPR018957 Zinc finger, C3HC4 RING-type	plastid	5	Y	none	plastid	13	plastid	50.1331
Solyc02g067690.2.1	Glucosyltransferase-like protein (AHRD V1 **** Q9LEQ4_ARATH); contains Interpro domain(s) IPR002213 UDP-glucuronosyl/UDP-glucosyltransferase	S	5	Y	plastid	plastid	7	G	99.7324
Solyc02g067800.2.1	LOB domain protein 1 (AHRD V1 ***- B2KKZ3_ORYSJ); contains Interpro domain(s) IPR004883 Lateral organ boundaries, LOB	plastid	4	Y	none	plastid	13	N	94.6368
Solyc02g067910.1.1	Unknown Protein (AHRD V1); contains Interpro domain(s) IPR013177 Protein of unknown function DUF1713, mitochondria	M	4	Y	M	plastid	5	N	73.6624
Solyc02g067940.1.1	Unknown Protein (AHRD V1)	plastid	3	Y	none	plastid	3	N	96.8448
Solyc02g067960.1.1	Mitochondrial transcription termination factor family protein (AHRD V1 ***- D7KVZ3_ARALY); contains Interpro domain(s) IPR003690 Mitochodrial transcription termination factor-related	S	4	Y	possibly M	plastid	18	G	48.9482
Solyc02g067980.2.1	Serine/threonine-protein phosphatase 2A regulatory subunit delta 1 isoform (AHRD V1 ***- Q0CAR1_ASPTN); contains Interpro domain(s) IPR002554 Protein phosphatase 2A, regulatory B subunit, B56	plastid	3	Y	none	plastid	8	N	57.8468
Solyc02g068010.2.1	DNA-binding protein (Fragment) (AHRD V1 *-*- Q5IRD2_9ROSI); contains Interpro domain(s) IPR006634 TRAM, LAG1 and CLN8 homology	S	1	-	ER	plastid	6	PM	82.101
Solyc02g068030.1.1	Unknown Protein (AHRD V1)	-	3	Y	none	plastid	3	C	61.9872
Solyc02g068050.2.1	SET domain-containing protein (AHRD V1 ***- D7M620_ARALY); contains Interpro domain(s) IPR001214 SET	plastid	3	Y	plastid	plastid	14	plastid	98.4884
Solyc02g068090.2.1	30S ribosomal protein S21, chloroplastic (Fragment) (AHRD V1 *--- RR21_SPIOL); contains Interpro domain(s) IPR001911 Ribosomal protein S21	plastid	1	Y	plastid	plastid	6	N	98.9587
Solyc02g068100.2.1	SWI/SNF related matrix associated actin dependent regulator of chromatin subfamily d member 1 (AHRD V1 ***- Q802C8_DANRE); contains Interpro domain(s) IPR019835 SWIB domain	-	5	Y	none	plastid	11	N	99.3106
Solyc02g068180.2.1	Cobalt import ATP-binding protein CbiO 2 (AHRD V1 ***- D4QI89_ENTFC); contains Interpro domain(s) IPR003439 ABC transporter-like	plastid	2	Y	plastid	plastid	10	plastid	99.9714
Solyc02g068270.2.1	Unknown Protein (AHRD V1)	plastid	1	Y	plastid	plastid	14	plastid	99.9459
Solyc02g068340.2.1	Kinesin-like calmodulin binding protein (AHRD V1 **** Q7Y1U0_GOSHI); contains Interpro domain(s) IPR001752 Kinesin, motor region	-	5	Y	none	plastid	5	C	99.9978
Solyc02g068350.1.1	Uroporphyrinogen-III synthase (AHRD V1 ***- Q3M8K2_ANAVT); contains Interpro domain(s) IPR003754 Tetrapyrrole biosynthesis, uroporphyrinogen III synthase	plastid	4	-	none	plastid	14	P	54.7566
Solyc02g068380.2.1	N-carbamoyl-L-amino-acid amidohydrolase (AHRD V1 **-- Q1LHR1_RALME); contains Interpro domain(s) IPR010158 Amidase, hydantoinase/carbamoylase	S	2	Y	possibly plastid	plastid	5	V	81.0488
Solyc02g068390.2.1	Mitochondrial inner membrane protease subunit 1 (AHRD V1 **-- B6T7U7_MAIZE); contains Interpro domain(s) IPR000223 Peptidase S26A, signal peptidase I	M	4	Y	none	plastid	4	C	73.5994
Solyc02g068440.2.1	RNA binding protein (AHRD V1 *-** B6U487_MAIZE); contains Interpro domain(s) IPR012677 Nucleotide-binding, alpha-beta plait	plastid	5	Y	possibly plastid	plastid	13	plastid	80.3338
Solyc02g068460.1.1	Unknown Protein (AHRD V1); contains Interpro domain(s) IPR008889 VQ	plastid	2	Y	none	plastid	5	N	91.9539
Solyc02g068470.1.1	Unknown Protein (AHRD V1)	plastid	4	-	none	not plastid	0	N	99.7413
Solyc02g068500.2.1	Thioredoxin o (AHRD V1 *-*- B9MUN0_POPTR); contains Interpro domain(s) IPR015467 Thioredoxin, core	M	2	Y	M	plastid	5	M	64.9737
Solyc02g068560.2.1	Chromodomain helicase DNA binding protein 5 (AHRD V1 *--- A2A8L1_MOUSE); contains Interpro domain(s) IPR000330 SNF2-related	plastid	4	-	none	plastid	5	N	99.9994
Solyc02g068640.2.1	Pyrroline-5-carboxylate reductase (AHRD V1 **** D2DEW0_PHYES); contains Interpro domain(s) IPR000304 Delta 1-pyrroline-5-carboxylate reductase	-	5	-	plastid	plastid	10	C	66.1197
Solyc02g068690.2.1	Exostosin family protein-like protein (AHRD V1 **-- Q84SM6_ORYSJ); contains Interpro domain(s) IPR004263 Exostosin-like	plastid	4	Y	none	plastid	4	plastid	47.8068
Solyc02g068710.2.1	ParB domain protein nuclease (AHRD V1 **-- B8HYI6_CYAP4); contains Interpro domain(s) IPR016692 Sulfiredoxin	M	5	Y	plastid	not plastid	0	plastid	89.1548
Solyc02g068730.2.1	chaperonin (AHRD V1 ***- B2IXD2_NOSP7); contains Interpro domain(s) IPR001844 Chaperonin plastidn60	-	5	-	possibly plastid	plastid	7	plastid	91.0023
Solyc02g068890.2.1	Pentatricopeptide repeat-containing protein (AHRD V1 ***- D7MTZ6_ARALY); contains Interpro domain(s) IPR002885 Pentatricopeptide repeat	M	3	Y	possibly M	plastid	13	M	88.2192
Solyc02g068930.2.1	Cytochrome c6 (AHRD V1 ***- D7MKY9_ARALY); contains Interpro domain(s) IPR003088 Cytochrome c, class I	plastid	4	-	none	plastid	6	plastid	99.2724
Solyc02g068950.1.1	Unknown Protein (AHRD V1)	plastid	3	-	none	plastid	11	EX	89.543
Solyc02g069010.2.1	Inositol monophosphatase family protein (AHRD V1 **** D7KK98_ARALY); contains Interpro domain(s) IPR000760 Inositol monophosphatase	M	5	Y	none	plastid	17	C	86.4797
Solyc02g069130.2.1	Peptidyl-prolyl cis-trans isomerase (AHRD V1 *-*- B1WW43_CYAA5); contains Interpro domain(s) IPR001179 Peptidyl-prolyl cis-trans isomerase, FKBP-type	M	5	Y	none	plastid	8	ER	98.4042
Solyc02g069170.1.1	Os12g0574800 protein (Fragment) (AHRD V1 *-*- Q0IME3_ORYSJ); contains Interpro domain(s) IPR006565 Bromodomain transcription factor	M	5	Y	none	plastid	8	plastid	79.1317
Solyc02g069180.2.1	Protein binding protein (AHRD V1 **-- D7L0L7_ARALY)	-	5	Y	none	plastid	8	N	71.9823
Solyc02g069210.2.1	Metal ion transporter-like protein (AHRD V1 **** B4YHA7_HORVU); contains Interpro domain(s) IPR004698 Zinc/iron permease, fungal and plant	S	1	Y	ER	not plastid	0	PM	99.3264
Solyc02g069240.1.1	Protein-O-fucosyltransferase 1 (AHRD V1 ***- Q659R8_ORYSA)	S	3	Y	ER	plastid	11	G	90.9805
Solyc02g069310.2.1	NPR1-2 protein (Fragment) (AHRD V1 ***- B8XQT6_SOYBN); contains Interpro domain(s) IPR013069 BTB/POZ	plastid	3	Y	none	plastid	1	C	85.2518
Solyc02g069320.1.1	Genomic DNA chromosome 5 P1 clone MPH15 (AHRD V1 **-- Q9FG25_ARATH); contains Interpro domain(s) IPR003690 Mitochodrial transcription termination factor-related	plastid	2	Y	possibly plastid	plastid	12	C	89.4163
Solyc02g069360.1.1	Aspartic proteinase nepenthesin-2 (AHRD V1 **-- B6SJT4_MAIZE); contains Interpro domain(s) IPR001461 Peptidase A1	S	1	Y	ER	plastid	5	V	88.0599
Solyc02g069410.2.1	HAD-superfamily hydrolase subfamily IA variant 3 containing protein expressed (AHRD V1 *-*- Q10I42_ORYSJ)	plastid	4	Y	possibly plastid	plastid	12	M	54.754
Solyc02g069420.2.1	Phospholipid-translocating P-type ATPase flippase family protein (AHRD V1 **** A2DBI9_TRIVA); contains Interpro domain(s) IPR006539 ATPase, P-type, phospholipid-translocating, flippase	-	5	Y	none	not plastid	0	M	41.4883
Solyc02g069450.2.1	Photosystem I reaction center subunit III (AHRD V1 ***- Q9XQB4_PHAAU); contains Interpro domain(s) IPR003666 Photosystem I reaction centre protein PsaF, subunit III	plastid	3	Y	plastid	plastid	13	plastid	99.9962
Solyc02g069460.2.1	Photosystem I reaction center subunit III (AHRD V1 ***- Q9XQB4_PHAAU); contains Interpro domain(s) IPR003666 Photosystem I reaction centre protein PsaF, subunit III	plastid	1	Y	plastid	plastid	12	plastid	99.9999
Solyc02g069470.2.1	Inter-alpha-trypsin inhibitor heavy chain H3 (AHRD V1 *--- ITIH3_MESAU); contains Interpro domain(s) IPR002035 von Willebrand factor, type A	plastid	2	Y	possibly plastid	plastid	12	plastid	84.1044
Solyc02g069480.1.1	Polygalacturonase (AHRD V1 ***- B6UB39_MAIZE); contains Interpro domain(s) IPR000743 Glycoside hydrolase, family 28	S	1	Y	ER	not plastid	0	EX	99.9259
Solyc02g069500.1.1	Pentatricopeptide repeat-containing protein (AHRD V1 ***- D7MEV2_ARALY); contains Interpro domain(s) IPR002885 Pentatricopeptide repeat	plastid	5	-	possibly M	plastid	9	C	83.4932
Solyc02g069510.1.1	Light-dependent short hypocotyls 1 (AHRD V1 ***- D7M6V0_ARALY); contains Interpro domain(s) IPR006936 Protein of unknown function DUF640	plastid	3	Y	possibly plastid	plastid	10	N	47.2053
Solyc02g069530.1.1	Unknown Protein (AHRD V1)	plastid	3	-	none	plastid	1	N	93.419
Solyc02g069560.2.1	Chloroplast unusual positioning 1A (AHRD V1 *--- A2V813_PHYPA); contains Interpro domain(s) IPR015425 Actin-binding FH2	-	5	Y	none	not plastid	0	N	97.884
Solyc02g069570.2.1	Pentatricopeptide repeat-containing protein (AHRD V1 *-*- D7LDK6_ARALY); contains Interpro domain(s) IPR002885 Pentatricopeptide repeat	S	4	-	possibly plastid	not plastid	0	C	97.1063
Solyc02g069620.2.1	Ribose 5-phosphate isomerase-like (AHRD V1 ***- Q2LC22_9ASTR); contains Interpro domain(s) IPR004788 Ribose 5-phosphate isomerase	plastid	3	Y	plastid	plastid	14	plastid	98.5748
Solyc02g069660.2.1	Vacuolar protein sorting-associated protein 54 (AHRD V1 ***- B0CS25_LACBS)	plastid	2	Y	none	plastid	1	N	77.3606
Solyc02g069690.1.1	FAD-binding domain-containing protein (AHRD V1 **-- D7MMH5_ARALY); contains Interpro domain(s) IPR006094 FAD linked oxidase, N-terminal	S	1	Y	ER	plastid	5	G	33.6748
Solyc02g069740.2.1	Lysine-specific demethylase 5B (AHRD V1 *--- KDM5B_MOUSE); contains Interpro domain(s) IPR013129 Transcription factor jumonji	plastid	5	-	none	not plastid	0	N	99.7719
Solyc02g069750.1.1	Choline/ethanolamine kinase (AHRD V1 **** B6TU35_MAIZE); contains Interpro domain(s) IPR002573 Choline/ethanolamine kinase	M	4	-	M	plastid	5	C	99.1055
Solyc02g069760.1.1	RING-finger protein-like (AHRD V1 *-*- Q5QLR6_ORYSJ); contains Interpro domain(s) IPR018957 Zinc finger, C3HC4 RING-type	-	5	-	possibly plastid	plastid	1	C	96.1884
Solyc02g069790.2.1	Splicing factor 45 (AHRD V1 ***- B6TI71_MAIZE); contains Interpro domain(s) IPR016967 Splicing factor, SPF45	-	4	Y	none	not plastid	0	N	99.998
Solyc02g070040.1.1	Ethylene-responsive nuclear protein (AHRD V1 *-*- Q38MV1_SOLLC)	-	5	Y	none	plastid	2	N	34.7079
Solyc02g070060.1.1	FAD-binding domain-containing protein (AHRD V1 **-- D7MFH6_ARALY); contains Interpro domain(s) IPR006094 FAD linked oxidase, N-terminal	S	2	Y	ER	plastid	2	V	47.0354
Solyc02g070230.1.1	Toprim domain-containing protein (ISS) (AHRD V1 ***- Q016M7_OSTTA)	plastid	5	-	none	plastid	3	C	90.7075
Solyc02g070390.2.1	PTAC12 (AHRD V1 ***- D7LH29_ARALY)	-	5	Y	plastid	not plastid	0	C	92.247
Solyc02g070430.2.1	Gibberellin 2-oxidase 1 (AHRD V1 **** A7LCJ5_SOLTU); contains Interpro domain(s) IPR005123 Oxoglutarate and iron-dependent oxygenase	-	3	-	possibly plastid	not plastid	0	C	99.8499
Solyc02g070460.2.1	Cullin 4 (AHRD V1 ***- A9LK40_SOLLC); contains Interpro domain(s) IPR001373 Cullin, N-terminal	plastid	5	Y	none	plastid	8	C	96.8974
Solyc02g070560.2.1	Phospho-N-acetylmuramoyl-pentapeptide-transferase (AHRD V1 ***- A0ZB89_NODSP); contains Interpro domain(s) IPR003524 Phospho-N-acetylmuramoyl-pentapeptide transferase	plastid	3	Y	none	not plastid	0	PM	90.2272
Solyc02g070620.2.1	F-box family protein (AHRD V1 ***- B9GFB6_POPTR); contains Interpro domain(s) IPR001810 Cyclin-like F-box	plastid	3	Y	none	plastid	2	N	42.9728
Solyc02g070770.2.1	NAD-dependent epimerase/dehydratase (AHRD V1 **-- B8HW76_CYAP4); contains Interpro domain(s) IPR016040 NAD(P)-binding domain	plastid	4	Y	possibly plastid	plastid	15	plastid	83.6576
Solyc02g070790.2.1	3-oxoacyl-(Acyl-carrier-protein) synthase 2 (AHRD V1 **** D0ZZB8_CHLPP); contains Interpro domain(s) IPR017568 3-oxoacyl-[acyl-carrier-protein] synthase 2	plastid	2	Y	plastid	plastid	9	plastid	91.7421
Solyc02g070800.2.1	Ycf23 protein (AHRD V1 ***- Q7NE74_GLOVI); contains Interpro domain(s) IPR007570 Protein of unknown function DUF561	plastid	4	Y	plastid	plastid	8	plastid	98.5525
Solyc02g070940.1.1	Chlorophyll a/b binding protein (AHRD V1 **** Q41422_SOLTU); contains Interpro domain(s) IPR001344 Chlorophyll A-B binding protein	plastid	2	Y	plastid	plastid	14	plastid	100
Solyc02g070950.1.1	Chlorophyll a/b binding protein (AHRD V1 **** Q41422_SOLTU); contains Interpro domain(s) IPR001344 Chlorophyll A-B binding protein	plastid	2	Y	plastid	plastid	14	plastid	100
Solyc02g070970.1.1	Chlorophyll a/b binding protein (AHRD V1 **** Q41422_SOLTU); contains Interpro domain(s) IPR001344 Chlorophyll A-B binding protein	plastid	2	Y	plastid	plastid	14	plastid	100
Solyc02g070980.1.1	Chlorophyll a/b binding protein (AHRD V1 **** Q41422_SOLTU); contains Interpro domain(s) IPR001344 Chlorophyll A-B binding protein	plastid	2	Y	plastid	plastid	14	plastid	100
Solyc02g070990.1.1	Chlorophyll a/b binding protein (AHRD V1 **** Q41422_SOLTU); contains Interpro domain(s) IPR001344 Chlorophyll A-B binding protein	plastid	2	Y	plastid	plastid	14	plastid	100
Solyc02g071000.1.1	Chlorophyll a/b binding protein (AHRD V1 **** Q41425_SOLTU); contains Interpro domain(s) IPR001344 Chlorophyll A-B binding protein	plastid	3	Y	plastid	plastid	14	plastid	100
Solyc02g071010.1.1	Chlorophyll a/b binding protein (AHRD V1 **** Q41422_SOLTU); contains Interpro domain(s) IPR001344 Chlorophyll A-B binding protein	plastid	2	Y	plastid	plastid	14	plastid	100
Solyc02g071030.1.1	Chlorophyll a/b binding protein (AHRD V1 **** Q41422_SOLTU); contains Interpro domain(s) IPR001344 Chlorophyll A-B binding protein	plastid	2	Y	plastid	plastid	14	plastid	100
Solyc02g071040.2.1	Glycogen synthase (AHRD V1 *-*- D1R4V0_9CHLA); contains Interpro domain(s) IPR011835 Glycogen/starch synthases, ADP-glucose type	plastid	4	Y	plastid	plastid	11	plastid	88.3986
Solyc02g071080.1.1	Purine permease family protein (AHRD V1 **-* D7MCV2_ARALY); contains Interpro domain(s) IPR004853 Protein of unknown function DUF250	S	5	Y	possibly plastid	plastid	5	PM	74.2839
Solyc02g071140.2.1	Outward rectifying potassium channel (AHRD V1 **** B9I109_POPTR); contains Interpro domain(s) IPR013099 Ion transport 2	plastid	5	-	none	not plastid	0	PM	70.1738
Solyc02g071190.2.1	Carboxyl-terminal-processing protease (AHRD V1 ***- B6SPN8_MAIZE); contains Interpro domain(s) IPR004447 Peptidase S41A, C-terminal protease	plastid	2	Y	none	plastid	1	plastid	70.4646
Solyc02g071210.2.1	Cold acclimation protein COR413-like (AHRD V1 *-*- A6YDU6_LOLTE); contains Interpro domain(s) IPR008892 Cold acclimation WCOR413	plastid	5	Y	plastid	plastid	6	plastid	91.8472
Solyc02g071250.2.1	Protein phosphatase (AHRD V1 *-*- A8N6T5_COPC7); contains Interpro domain(s) IPR011948 Dullard-like phosphatase domain	plastid	3	Y	possibly M	plastid	13	C	95.7906
Solyc02g071260.2.1	Phytochrome E	plastid	5	Y	none	not plastid	0	N	65.638
Solyc02g071280.2.1	Ribosome maturation factor rimM (AHRD V1 *-*- A4CTC3_SYNPV); contains Interpro domain(s) IPR011961 16S rRNA processing protein RimM	plastid	2	Y	possibly plastid	plastid	11	plastid	90.7151
Solyc02g071290.1.1	Unknown Protein (AHRD V1)	plastid	5	-	-	plastid	7	V	51.0253
Solyc02g071320.2.1	Unknown Protein (AHRD V1)	plastid	5	-	none	not plastid	0	N	99.5736
Solyc02g071520.2.1	RAG1-activating protein 1 homolog (AHRD V1 **-- R1AP1_DICDI); contains Interpro domain(s) IPR018179 RAG1-activating protein 1 homologue	S	1	Y	none	plastid	12	PM	99.8579
Solyc02g071570.2.1	Pentatricopeptide repeat-containing protein At4g21190 (AHRD V1 ***- PP332_ARATH)	S	4	-	possibly plastid	not plastid	0	C	74.6165
Solyc02g071590.1.1	Alpha alpha-trehalose-phosphate synthase (AHRD V1 **** D0NRZ0_PHYIN); contains Interpro domain(s) IPR012766 Alpha,alpha-trehalose-phosphate synthase	plastid	5	-	none	not plastid	0	C	99.9066
Solyc02g071600.2.1	Unknown Protein (AHRD V1)	S	1	Y	ER	plastid	13	G	33.2263
Solyc02g071800.2.1	Receptor like kinase, RLK	S	3	-	possibly plastid	plastid	6	PM	79.5029
Solyc02g071850.1.1	Unknown Protein (AHRD V1)	M	3	Y	possibly M	plastid	8	plastid	67.7008
Solyc02g071930.1.1	CTD small phosphatase-like protein (AHRD V1 *-** C3KI43_ANOFI); contains Interpro domain(s) IPR011948 Dullard-like phosphatase domain	plastid	3	Y	M	plastid	3	M	86.652
Solyc02g071940.1.1	Unknown Protein (AHRD V1)	S	1	Y	ER	plastid	12	EX	93.5524
Solyc02g071950.1.1	Unknown Protein (AHRD V1)	plastid	5	Y	ER	plastid	2	EX	99.8234
Solyc02g072010.1.1	Pentatricopeptide repeat-containing protein (AHRD V1 ***- D7M9E6_ARALY); contains Interpro domain(s) IPR002885 Pentatricopeptide repeat	plastid	3	-	possibly plastid	plastid	12	plastid	70.1972
Solyc02g072140.1.1	UNE1-like protein (AHRD V1 ***- B2ZAQ7_GOSRA); contains Interpro domain(s) IPR006943 Protein of unknown function DUF641, plant	plastid	5	Y	none	plastid	2	C	54.7942
Solyc02g072170.2.1	Unknown Protein (AHRD V1)	plastid	3	-	none	not plastid	0	N	97.8251
Solyc02g072250.1.1	LRR receptor-like serine/threonine-protein kinase, RLP	plastid	4	Y	ER	not plastid	0	PM	50.9845
Solyc02g072260.2.1	H2B histone-fold-like protein (Fragment) (AHRD V1 ***- A7VMP7_TOBAC); contains Interpro domain(s) IPR011112 Rho termination factor, N-terminal	plastid	3	Y	plastid	plastid	13	N	40.9578
Solyc02g072390.1.1	LRR receptor-like serine/threonine-protein kinase, RLP	plastid	2	Y	possibly plastid	plastid	1	plastid	94.4643
Solyc02g072410.1.1	Unknown Protein (AHRD V1)	plastid	4	Y	possibly plastid	plastid	4	N	69.3916
Solyc02g072460.1.1	Ycf20-like protein (AHRD V1 ***- YC20L_SYNY3); contains Interpro domain(s) IPR007572 Protein of unknown function DUF565	plastid	5	Y	possibly plastid	plastid	14	plastid	98.1223
Solyc02g072520.2.1	Receptor like kinase, RLK	S	5	Y	ER	plastid	2	ER	55.0738
Solyc02g074600.2.1	Unknown Protein (AHRD V1)	plastid	5	Y	possibly plastid	plastid	14	EX	82.0552
Solyc02g076710.2.1	Cathepsin B-like cysteine proteinase (AHRD V1 *--* CYSP_SCHMA); contains Interpro domain(s) IPR013128 Peptidase C1A, papain	S	1	Y	ER	plastid	6	V	82.9836
Solyc02g076760.2.1	N-(5&apos-phosphoribosyl)anthranilate isomerase (AHRD V1 **** B9SQM9_RICCO); contains Interpro domain(s) IPR011060 Ribulose-phosphate binding barrel	-	5	-	none	plastid	2	plastid	97.4999
Solyc02g076820.2.1	Light-dependent short hypocotyls 1 (AHRD V1 ***- D7M6V0_ARALY); contains Interpro domain(s) IPR006936 Protein of unknown function DUF640	plastid	5	-	none	not plastid	0	N	93.8629
Solyc02g076870.2.1	Potential lipid particle serine esterase (AHRD V1 *--- Q59KL3_CANAL); contains Interpro domain(s) IPR007751 Protein of unknown function DUF676, hydrolase-like	plastid	1	Y	plastid	plastid	12	plastid	98.159
Solyc02g076900.2.1	Dual specificity protein phosphatase (AHRD V1 ***- Q2HSZ6_MEDTR)	plastid	5	Y	possibly M	plastid	4	N	96.2182
Solyc02g076950.2.1	UPF0052 domain protein (AHRD V1 **-- A1CBK9_ASPCL); contains Interpro domain(s) IPR002882 LPPG:FO 2-phospho-L-lactate transferase CofD/UPF0052	plastid	2	Y	plastid	plastid	19	plastid	99.7517
Solyc02g077060.1.1	RPW8.2 (AHRD V1 **-- C4P0N9_ARALP); contains Interpro domain(s) IPR008808 Mildew-resistance, broad-spectrum	plastid	5	-	possibly plastid	plastid	6	C	65.9832
Solyc02g077090.2.1	Chloroplast unusual positioning 1A (AHRD V1 *--- B3IYT7_ADICA)	plastid	1	Y	possibly M	plastid	9	plastid	74.4099
Solyc02g077210.1.1	Unknown Protein (AHRD V1)	plastid	2	Y	none	plastid	11	plastid	98.0044
Solyc02g077240.2.1	Pyruvate decarboxylase (AHRD V1 **** Q1I1D9_CITSI); contains Interpro domain(s) IPR012110 Pyruvate decarboxylase/indolepyruvate decarboxylase	plastid	3	Y	none	plastid	9	C	86.8036
Solyc02g077280.2.1	GTP-binding protein era homolog (AHRD V1 ***- D0MDG4_RHOM4); contains Interpro domain(s) IPR005662 GTP-binding protein Era	plastid	5	Y	none	plastid	13	C	99.5884
Solyc02g077300.1.1	Peroxidase 73 (AHRD V1 **** B6U0T8_MAIZE); contains Interpro domain(s) IPR002016 Haem peroxidase, plant/fungal/bacterial	S	1	Y	ER	plastid	14	G	49.3221
Solyc02g077390.1.1	WUSCHEL-related homeobox 11 (AHRD V1 *-*- B6SN57_MAIZE); contains Interpro domain(s) IPR001356 Homeobox	plastid	4	-	none	not plastid	0	N	99.9921
Solyc02g077470.2.1	Optic atrophy 3 protein homolog (AHRD V1 **-- OPA3_DANRE); contains Interpro domain(s) IPR010754 Optic atrophy 3-like	M	3	Y	M	plastid	11	M	76.8695
Solyc02g077480.1.1	Histone H3 (AHRD V1 ***- D8L9K7_WHEAT); contains Interpro domain(s) IPR000164 Histone H3	plastid	3	Y	none	plastid	2	N	99.991
Solyc02g077580.1.1	Glutaredoxin (AHRD V1 **** B9H2P7_POPTR); contains Interpro domain(s) IPR012335 Thioredoxin fold	plastid	2	Y	none	plastid	2	C	93.5865
Solyc02g077600.2.1	Guanylate-binding protein 10 (AHRD V1 *-*- Q000W5_MOUSE); contains Interpro domain(s) IPR015894 Guanylate-binding protein, N-terminal	plastid	3	Y	none	plastid	11	N	66.1619
Solyc02g077610.2.1	NAC domain protein IPR003441 (AHRD V1 ***- B9H2Q1_POPTR); contains Interpro domain(s) IPR003441 No apical meristem (NAM) protein	plastid	3	-	none	plastid	4	N	62.75
Solyc02g077680.2.1	Phosphorylase (AHRD V1 **** B9H2Q8_POPTR); contains Interpro domain(s) IPR011833 Glycogen/starch/alpha-glucan phosphorylase	plastid	1	Y	plastid	plastid	20	plastid	93.9136
Solyc02g077730.2.1	Unknown Protein (AHRD V1)	plastid	5	Y	M	plastid	12	M	99.4177
Solyc02g077740.2.1	OB-fold nucleic acid binding domain containing protein (AHRD V1 ***- B6SHT0_MAIZE); contains Interpro domain(s) IPR012340 Nucleic acid-binding, OB-fold	plastid	3	Y	none	plastid	12	C	78.0618
Solyc02g077860.1.1	Ribulose bisphosphate carboxylase large chain (Fragment) (AHRD V1 *-*- C7A608_9ROSI); contains Interpro domain(s) IPR000685 Ribulose bisphosphate carboxylase, large subunit, C-terminal	S	4	-	none	not plastid	0	plastid	52.9304
Solyc02g077910.2.1	Mitochondrial ornithine carrier protein (AHRD V1 **** B6K278_SCHJY); contains Interpro domain(s) IPR018108 Mitochondrial substrate/solute carrier	-	3	-	none	plastid	3	plastid	40.5938
Solyc02g077940.1.1	Unknown Protein (AHRD V1)	plastid	3	-	-	plastid	1	N	91.0337
Solyc02g077970.2.1	Late embryo abundance protein (Fragment) (AHRD V1 *-*- C6F8V9_PSEMZ)	plastid	2	Y	plastid	plastid	5	N	84.5209
Solyc02g077980.1.1	Unknown Protein (AHRD V1)	plastid	5	-	M	plastid	6	N	89.576
Solyc02g077990.2.1	30S ribosomal protein S5 (AHRD V1 ***- B6TT32_MAIZE); contains Interpro domain(s) IPR005712 Ribosomal protein S5, bacterial-type	plastid	3	Y	plastid	plastid	7	plastid	99.9852
Solyc02g078030.1.1	DNA-binding WRKY VQ (AHRD V1 ***- Q2HTS9_MEDTR); contains Interpro domain(s) IPR008889 VQ	plastid	2	Y	none	plastid	1	N	97.9021
Solyc02g078060.1.1	pistil extensin-like protein (Fragment) (AHRD V1 ***- Q49I27_9SOLA); contains Interpro domain(s) IPR006041 Pollen Ole e 1 allergen and extensin	plastid	4	-	none	not plastid	0	EX	99.8925
Solyc02g078110.1.1	Unknown Protein (AHRD V1)	plastid	2	Y	none	plastid	6	N	76.0648
Solyc02g078120.1.1	Eukaryotic translation initiation factor 3 subunit 7 (AHRD V1 ***- Q9FKV6_ARATH); contains Interpro domain(s) IPR007783 Eukaryotic translation initiation factor 3, subunit 7	plastid	4	Y	none	not plastid	0	C	99.1956
Solyc02g078180.2.1	Os11g0198100 protein (Fragment) (AHRD V1 *-*- Q0IU20_ORYSJ); contains Interpro domain(s) IPR006852 Protein of unknown function DUF616	M	4	Y	none	plastid	5	plastid	95.185
Solyc02g078200.2.1	50S ribosomal protein L21 (AHRD V1 *-*- B6TJJ8_MAIZE); contains Interpro domain(s) IPR001787 Ribosomal protein L21	plastid	5	Y	possibly M	plastid	16	M	81.1386
Solyc02g078220.1.1	Unknown Protein (AHRD V1)	M	4	Y	none	not plastid	0	PM	99.4822
Solyc02g078240.2.1	2,3-bisphosphoglycerate-dependent phosphoglycerate mutase (AHRD V1 ***- GPMA_CYTH3); contains Interpro domain(s) IPR013078 Phosphoglycerate mutase	-	5	Y	ER	plastid	4	C	81.473
Solyc02g078280.2.1	Myosin-like protein (AHRD V1 *-*- Q84ZN0_ORYSJ)	plastid	3	-	none	not plastid	0	N	99.6586
Solyc02g078300.2.1	Transcription initiation factor TFIID subunit (AHRD V1 ***- D3BV86_POLPA); contains Interpro domain(s) IPR003195 Transcription initiation factor IID, 18 kDa subunit	plastid	4	Y	none	plastid	2	N	99.9618
Solyc02g078390.2.1	MutS2 protein (AHRD V1 ***- B0JH18_MICAN); contains Interpro domain(s) IPR005747 DNA mismatch repair protein MutS, type 2	plastid	2	Y	none	plastid	9	N	84.595
Solyc02g078410.1.1	Acyl-CoA thioesterase/ catalytic/ hydrolase acting on ester bonds (AHRD V1 **-* B6TLJ7_MAIZE); contains Interpro domain(s) IPR003736 Phenylacetic acid degradation-related protein	-	4	-	none	plastid	7	plastid	52.2325
Solyc02g078500.2.1	Aluminum-induced protein-like (AHRD V1 ***- Q9FG81_ARATH)	plastid	5	Y	none	plastid	3	N	49.0058
Solyc02g078510.2.1	Acyltransferase-like protein (AHRD V1 ***- Q589X7_TOBAC)	plastid	2	Y	plastid	plastid	3	plastid	67.5934
Solyc02g078590.1.1	Alpha-1 4-galactosyltransferase (AHRD V1 *-*- Q0R0H6_MOUSE); contains Interpro domain(s) IPR007652 Alpha 1,4-glycosyltransferase conserved region	S	3	Y	ER	plastid	8	G	82.6275
Solyc02g078610.2.1	Splicing factor 3b subunit 2 (AHRD V1 **-- Q80W39_MOUSE); contains Interpro domain(s) IPR007180 Protein of unknown function DUF382	plastid	5	-	none	not plastid	0	N	99.9932
Solyc02g078650.2.1	Polyphenol oxidase (AHRD V1 ***- B3WFP2_TAROF); contains Interpro domain(s) IPR016213 Polyphenol oxidase, plant	plastid	1	Y	possibly plastid	plastid	20	plastid	99.9857
Solyc02g078660.2.1	Phosphoinositide-binding clathrin adaptor N-terminal Wiscott-Aldrich syndrome C-terminal (AHRD V1 *--- A2Q4Q2_MEDTR)	-	5	-	plastid	not plastid	0	N	94.7718
Solyc02g078710.1.1	Kelch-like 8 (AHRD V1 *-*- Q28D69_XENTR); contains Interpro domain(s) IPR015915 Kelch-type beta propeller	plastid	5	Y	possibly plastid	plastid	11	plastid	70.7976
Solyc02g078760.1.1	CK25 (AHRD V1 ***- Q1W1G0_TOBAC)	plastid	3	-	possibly plastid	not plastid	0	N	99.5652
Solyc02g078860.2.1	3&apos(2&apos) 5&apos-bisphosphate nucleotidase (AHRD V1 **** Q0WTT5_ARATH); contains Interpro domain(s) IPR006239 3(2),5 -bisphosphate nucleotidase HAL2	-	4	Y	none	plastid	18	C	48.0166
Solyc02g079000.2.1	Cell division protease ftsH homolog 4 (AHRD V1 *-*- FTSH4_SYNY3); contains Interpro domain(s) IPR003959 ATPase, AAA-type, core	plastid	1	Y	none	plastid	1	plastid	99.7105
Solyc02g079020.2.1	AP2 domain-containing transcription factor (AHRD V1 *--* B9HWL7_POPTR); contains Interpro domain(s) IPR003340 Transcriptional factor B3	plastid	4	-	none	plastid	2	N	99.9994
Solyc02g079090.2.1	F-box family protein (AHRD V1 ***- B9GFH4_POPTR); contains Interpro domain(s) IPR001810 Cyclin-like F-box	-	4	Y	possibly plastid	plastid	1	P	75.8126
Solyc02g079130.2.1	Protein translocase subunit secA (AHRD V1 *-*- SECA_CALS8); contains Interpro domain(s) IPR004027 SEC-C motif	M	3	Y	M	plastid	8	M	97.4583
Solyc02g079200.1.1	Armadillo/beta-catenin repeat family protein (AHRD V1 **-- D7KW19_ARALY); contains Interpro domain(s) IPR011989 Armadillo-like helical	plastid	4	-	none	not plastid	0	C	64.9356
Solyc02g079210.2.1	DAG protein (AHRD V1 *-*- B6SJX7_MAIZE)	plastid	5	Y	M	plastid	8	M	99.2299
Solyc02g079230.2.1	Vesicle-associated membrane family protein (AHRD V1 ***- D7MET3_ARALY); contains Interpro domain(s) IPR000535 Major sperm protein	plastid	5	Y	none	not plastid	0	N	74.0927
Solyc02g079250.2.1	3&apos(2&apos) 5&apos-bisphosphate nucleotidase-like protein (AHRD V1 **** Q682R6_ARATH); contains Interpro domain(s) IPR000760 Inositol monophosphatase	M	2	Y	possibly M	plastid	13	M	99.9917
Solyc02g079380.1.1	Pentatricopeptide repeat-containing protein (AHRD V1 ***- D7KMD0_ARALY); contains Interpro domain(s) IPR002885 Pentatricopeptide repeat	plastid	5	-	possibly plastid	plastid	10	plastid	44.6222
Solyc02g079410.2.1	Universal stress protein (Usp) (AHRD V1 *--- A2Q2X4_MEDTR); contains Interpro domain(s) IPR006016 UspA	plastid	4	-	none	plastid	3	C	73.6024
Solyc02g079550.1.1	Serine/threonine kinase receptor (AHRD V1 **** Q7DMS5_BRANA); contains Interpro domain(s) IPR002290 Serine/threonine protein kinase	S	2	Y	ER	not plastid	0	PM	98.981
Solyc02g079630.1.1	Receptor kinase (AHRD V1 **** Q39086_ARATH); contains Interpro domain(s) IPR002290 Serine/threonine protein kinase	plastid	5	Y	none	plastid	10	PM	98.3497
Solyc02g079660.1.1	Receptor-like protein kinase (AHRD V1 ***- Q9ZT06_ARATH); contains Interpro domain(s) IPR001245 Tyrosine protein kinase	-	4	-	none	plastid	3	plastid	55.7296
Solyc02g079680.1.1	Cysteine-rich receptor-like protein kinase 26 (AHRD V1 ***- CRK26_ARATH); contains Interpro domain(s) IPR000719 Protein kinase, core	plastid	4	-	none	plastid	5	M	61.2241
Solyc02g079730.2.1	Thioredoxin family protein (AHRD V1 ***- B6TC88_MAIZE)	plastid	5	Y	none	plastid	11	N	69.4778
Solyc02g079760.2.1	BHLH transcription factor-like protein (AHRD V1 *-*- Q5ZAK6_ORYSJ); contains Interpro domain(s) IPR011598 Helix-loop-helix DNA-binding	plastid	4	Y	none	not plastid	0	N	99.9883
Solyc02g079770.2.1	DAG protein (AHRD V1 ***- B6TYI4_MAIZE)	plastid	1	Y	plastid	plastid	15	plastid	99.6093
Solyc02g079820.2.1	Pentatricopeptide repeat-containing protein (AHRD V1 ***- D7KN35_ARALY); contains Interpro domain(s) IPR002885 Pentatricopeptide repeat	plastid	5	-	possibly M	plastid	16	C	96.9302
Solyc02g079830.1.1	Pentatricopeptide repeat-containing protein (AHRD V1 ***- D7KN35_ARALY); contains Interpro domain(s) IPR002885 Pentatricopeptide repeat	M	4	Y	M	plastid	10	C	85.276
Solyc02g079880.2.1	Translation initiation factor-related (AHRD V1 ***- D3YBD7_TRIRP)	-	3	Y	none	not plastid	0	N	77.1028
Solyc02g079890.1.1	Beta-ocimene synthase (AHRD V1 **** B1P189_PHALU); contains Interpro domain(s) IPR005630 Terpene synthase, metal-binding domain	-	3	-	plastid	plastid	7	C	93.8883
Solyc02g079920.2.1	Transcription factor (Fragment) (AHRD V1 *-** D6MKQ1_9ASPA); contains Interpro domain(s) IPR007087 Zinc finger, C2H2-type	-	5	-	possibly plastid	plastid	2	C	77.4049
Solyc02g079950.2.1	Oxygen-evolving enhancer protein 3 (AHRD V1 ***- Q7Y1T5_PEA); contains Interpro domain(s) IPR008797 Photosystem II oxygen evolving complex protein PsbQ	plastid	2	Y	plastid	plastid	14	plastid	99.9999
Solyc02g080040.2.1	Receptor-like protein kinase (AHRD V1 **** C6ZRS0_SOYBN); contains Interpro domain(s) IPR002290 Serine/threonine protein kinase	plastid	4	-	none	plastid	3	P	43.9643
Solyc02g080170.1.1	Pentatricopeptide repeat-containing protein (AHRD V1 ***- D7M761_ARALY); contains Interpro domain(s) IPR002885 Pentatricopeptide repeat	plastid	5	Y	M	plastid	20	plastid	43.4919
Solyc02g080200.2.1	Pectinesterase (AHRD V1 ***- B9RXQ4_RICCO); contains Interpro domain(s) IPR000070 Pectinesterase, catalytic	plastid	3	Y	plastid	plastid	18	PM	63.5828
Solyc02g080210.2.1	Pectinesterase (AHRD V1 ***- B9RXQ4_RICCO); contains Interpro domain(s) IPR000070 Pectinesterase, catalytic	plastid	3	Y	plastid	plastid	11	PM	52.7628
Solyc02g080220.2.1	Pectinesterase (AHRD V1 ***- B9RXQ4_RICCO); contains Interpro domain(s) IPR000070 Pectinesterase, catalytic	plastid	3	Y	none	plastid	13	V	47.6766
Solyc02g080230.2.1	Rop-interactive crib motif-containing protein 1 (AHRD V1 *--- D7LGA6_ARALY); contains Interpro domain(s) IPR000095 PAK-box/P21-Rho-binding	-	5	-	possibly plastid	not plastid	0	C	99.6076
Solyc02g080320.2.1	Pseudouridine synthase family protein (AHRD V1 **** D7MEP4_ARALY); contains Interpro domain(s) IPR006145 Pseudouridine synthase, RsuA and RluB/C/D/E/F	plastid	1	Y	plastid	plastid	20	plastid	99.0512
Solyc02g080390.2.1	Abnormal spindle-like microcephaly-associated protein (Fragment) (AHRD V1 *-*- B6UL97_HYLME); contains Interpro domain(s) IPR016146 Calponin-homology	plastid	2	Y	none	not plastid	0	C	99.9884
Solyc02g080400.1.1	Abnormal spindle-like microcephaly-associated protein homolog (AHRD V1 *-*- ASPM_MOUSE); contains Interpro domain(s) IPR016024 Armadillo-type fold	plastid	5	-	none	plastid	3	C	98.6265
Solyc02g080440.2.1	FeS assembly protein SufB (AHRD V1 ***- Q3MG36_ANAVT); contains Interpro domain(s) IPR010231 SUF system FeS cluster assembly, SufB	plastid	5	-	possibly plastid	not plastid	0	plastid	65.6407
Solyc02g080520.2.1	Os04g0625000 protein (Fragment) (AHRD V1 *-*- Q0J9Y7_ORYSJ)	-	5	Y	none	not plastid	0	N	75.588
Solyc02g080540.1.1	ATP synthase gamma chain (AHRD V1 ***- B7FIR4_MEDTR); contains Interpro domain(s) IPR000131 ATPase, F1 complex, gamma subunit	plastid	1	Y	plastid	plastid	13	plastid	98.7747
Solyc02g080560.1.1	Unknown Protein (AHRD V1)	M	4	Y	none	plastid	8	M	97.8738
Solyc02g080570.2.1	Glycogen synthase (AHRD V1 *-** D4ZXV2_SPIPL); contains Interpro domain(s) IPR011835 Glycogen/starch synthases, ADP-glucose type	plastid	4	Y	plastid	plastid	13	plastid	79.2775
Solyc02g080620.2.1	Prephenate dehydratase family protein (AHRD V1 **** D7KMI7_ARALY); contains Interpro domain(s) IPR001086 Prephenate dehydratase	M	3	-	plastid	plastid	14	plastid	90.5846
Solyc02g080630.2.1	Lactoylglutathione lyase (AHRD V1 ***- D2D330_GOSHI); contains Interpro domain(s) IPR004361 Glyoxalase I	S	1	Y	ER	plastid	4	G	78.1227
Solyc02g080640.2.1	Phosphoadenosine phosphosulfate reductase (AHRD V1 *-** B7I7M3_ACIB5); contains Interpro domain(s) IPR013766 Thioredoxin domain	plastid	1	Y	plastid	plastid	14	plastid	99.9847
Solyc02g080660.2.1	Glucan endo-1 3-beta-glucosidase 3 (AHRD V1 ***- B6UBU1_MAIZE); contains Interpro domain(s) IPR012946 X8	S	1	Y	ER	plastid	1	G	42.1028
Solyc02g080780.2.1	Unknown Protein (AHRD V1)	plastid	4	Y	possibly plastid	plastid	1	plastid	40.0588
Solyc02g080830.1.1	F-box-like (AHRD V1 ***- Q6H6K1_ORYSJ)	plastid	3	Y	possibly plastid	plastid	12	plastid	80.0166
Solyc02g080840.1.1	F-box-like (AHRD V1 ***- Q6H6K1_ORYSJ)	plastid	3	Y	plastid	plastid	12	plastid	93.5874
Solyc02g080850.1.1	F-box-like (AHRD V1 ***- Q6H6K1_ORYSJ)	plastid	5	-	plastid	plastid	12	plastid	91.4496
Solyc02g080860.1.1	Myb family transcription factor (AHRD V1 *--- D7LIV0_ARALY); contains Interpro domain(s) IPR006447 Myb-like DNA-binding region, SHAQKYF class	plastid	5	Y	none	plastid	1	N	99.4991
Solyc02g080880.2.1	Aspartic proteinase (AHRD V1 **-* Q8L6A8_THECC); contains Interpro domain(s) IPR001461 Peptidase A1	S	2	Y	possibly ER	plastid	13	V	47.6266
Solyc02g080890.2.1	Transcription factor WRKY (AHRD V1 ***- C7E5X8_CAPAN); contains Interpro domain(s) IPR003657 DNA-binding WRKY	-	4	Y	none	plastid	14	N	99.9608
Solyc02g080940.2.1	Proline synthetase co-transcribed bacterial homolog protein (AHRD V1 **-- B5X4B5_SALSA); contains Interpro domain(s) IPR011078 Predicted pyridoxal phosphate-dependent enzyme, YBL036C type	plastid	4	-	plastid	plastid	3	C	54.2712
Solyc02g080970.2.1	Os06g0661900 protein (Fragment) (AHRD V1 ***- Q0DAD0_ORYSJ); contains Interpro domain(s) IPR004949 Protein of unknown function DUF266, plant	M	5	Y	M	plastid	5	G	98.7837
Solyc02g081000.1.1	Leucyl-tRNA synthetase (AHRD V1 *-*- D5H7P2_SALRM); contains Interpro domain(s) IPR002302 Leucyl-tRNA synthetase, class Ia, bacterial/mitochondrial	plastid	5	Y	none	plastid	12	plastid	33.6775
Solyc02g081160.2.1	Diphosphate-fructose-6-phosphate 1-phosphotransferase (AHRD V1 ***- D1JTA2_9BACE); contains Interpro domain(s) IPR011183 Pyrophosphate-dependent phosphofructokinase PfpB	plastid	3	-	plastid	plastid	6	C	71.9919
Solyc02g081170.2.1	Plastid-lipid-associated protein, chloroplastic (AHRD V1 **-- PAP_CITUN); contains Interpro domain(s) IPR006843 PAP fibrillin	plastid	2	Y	plastid	plastid	8	plastid	99.9843
Solyc02g081200.1.1	At1g62390-like protein (Fragment) (AHRD V1 *--- C0JCT1_9BRAS); contains Interpro domain(s) IPR011990 Tetratricopeptide-like helical	M	5	Y	none	plastid	3	C	66.217
Solyc02g081210.2.1	Expansin (AHRD V1 ***- Q9ZP33_SOLLC); contains Interpro domain(s) IPR002963 Expansin	S	5	Y	ER	plastid	7	EX	94.9954
Solyc02g081220.1.1	Unknown Protein (AHRD V1)	S	1	-	ER	plastid	2	EX	96.6774
Solyc02g081230.2.1	Unknown Protein (AHRD V1)	S	3	Y	ER	plastid	8	PM	94.1092
Solyc02g081310.2.1	50S ribosomal protein L15 (AHRD V1 ***- D0P1Y0_PHYIN); contains Interpro domain(s) IPR005749 Ribosomal protein L15, bacterial-type	plastid	5	Y	M	plastid	8	M	99.7865
Solyc02g081330.2.1	Phytoene synthase 2	-	3	-	plastid	plastid	6	plastid	99.9859
Solyc02g081350.2.1	Acyl-CoA synthetase/AMP-acid ligase II (AHRD V1 **** D0C359_9GAMM); contains Interpro domain(s) IPR000873 AMP-dependent synthetase and ligase	-	4	Y	possibly plastid	plastid	11	plastid	52.9513
Solyc02g081360.2.1	Long-chain-fatty-acid--CoA ligase (AHRD V1 **** D0J2H7_COMT2); contains Interpro domain(s) IPR000873 AMP-dependent synthetase and ligase	-	4	Y	none	plastid	10	C	40.9543
Solyc02g081370.2.1	Acyl-CoA synthetase /AMP-acid ligase II (AHRD V1 **** D0S5Q6_ACICA); contains Interpro domain(s) IPR000873 AMP-dependent synthetase and ligase	-	4	Y	none	plastid	9	C	40.9543
Solyc02g081440.2.1	Os02g0638200 protein (Fragment) (AHRD V1 *-*- Q0DZ92_ORYSJ)	plastid	3	Y	none	not plastid	0	N	97.7824
Solyc02g081510.1.1	Receptor-like protein kinase (AHRD V1 **** Q9M576_ORYSA); contains Interpro domain(s) IPR002290 Serine/threonine protein kinase	-	4	-	possibly plastid	not plastid	0	C	71.9882
Solyc02g081550.2.1	ATP-dependent Zn protease cell division protein FtsH homolog (AHRD V1 **** B2XTF7_HETA2); contains Interpro domain(s) IPR001315 Caspase Recruitment IPR003960 ATPase, AAA-type, conserved site IPR005936 Peptidase M41, FtsH IPR006025 Peptidase M, neutral zinc metallopeptidases, zinc-binding site	plastid	3	Y	plastid	plastid	5	C	98.39
Solyc02g081640.2.1	Transcription factor tfiiib component (AHRD V1 *--- B6K325_SCHJY); contains Interpro domain(s) IPR014778 Myb, DNA-binding	M	5	Y	possibly M	not plastid	0	N	99.9843
Solyc02g081660.2.1	GTP-binding protein era homolog (AHRD V1 ***- D7AAD9_STAND); contains Interpro domain(s) IPR005662 GTP-binding protein Era	M	3	Y	M	plastid	6	C	99.3659
Solyc02g081670.1.1	Fimbriata (Fragment) (AHRD V1 **-- Q6QVW9_MIMLE); contains Interpro domain(s) IPR001810 Cyclin-like F-box	-	5	Y	none	plastid	12	V	52.0342
Solyc02g081740.1.1	Acyltransferase (Fragment) (AHRD V1 **-- C1JZ77_9SOLA); contains Interpro domain(s) IPR003480 Transferase	-	4	-	plastid	plastid	17	plastid	83.6257
Solyc02g081750.1.1	Acyltransferase (Fragment) (AHRD V1 **-- C1JZ77_9SOLA); contains Interpro domain(s) IPR003480 Transferase	-	4	-	possibly plastid	plastid	2	plastid	92.6145
Solyc02g081760.1.1	Acyltransferase (Fragment) (AHRD V1 **-- C1JZ77_9SOLA); contains Interpro domain(s) IPR003480 Transferase	-	5	-	plastid	plastid	9	plastid	96.0497
Solyc02g081800.1.1	Acyltransferase (Fragment) (AHRD V1 **-- C1JZ77_9SOLA); contains Interpro domain(s) IPR003480 Transferase	-	3	-	possibly plastid	not plastid	0	plastid	47.0717
Solyc02g081860.1.1	Pentatricopeptide repeat-containing protein (AHRD V1 ***- D7MRA3_ARALY); contains Interpro domain(s) IPR002885 Pentatricopeptide repeat	M	3	Y	M	plastid	16	C	76.9505
Solyc02g081880.2.1	Molybdenum cofactor sulfurase protein-like (AHRD V1 **-- Q653D7_ORYSJ); contains Interpro domain(s) IPR005303 MOSC, N-terminal beta barrel	plastid	5	-	possibly plastid	plastid	14	plastid	41.4525
Solyc02g081900.2.1	Pentatricopeptide repeat-containing protein (AHRD V1 ***- D7KMD0_ARALY); contains Interpro domain(s) IPR002885 Pentatricopeptide repeat	plastid	1	Y	plastid	plastid	13	C	86.2152
Solyc02g081910.1.1	DNA topoisomerase (AHRD V1 **** B9SPT5_RICCO); contains Interpro domain(s) IPR005733 DNA topoisomerase I, bacterial-type	M	5	Y	plastid	plastid	6	N	95.6166
Solyc02g081920.2.1	Plastid ribulose-1 5 bisphosphate carboxylase/oxygenase large subunit N-methyltransferase-related protein (Fragment) (AHRD V1 *-*- A7KWL3_ARALP); contains Interpro domain(s) IPR001214 SET	-	5	Y	possibly plastid	plastid	12	N	95.4722
Solyc02g081930.2.1	Unknown Protein (AHRD V1)	M	2	Y	M	not plastid	0	M	67.5435
Solyc02g082030.2.1	ABC-type transport system-like (AHRD V1 **-- Q5JL23_ORYSJ); contains Interpro domain(s) IPR003399 Mammalian cell entry related	plastid	2	Y	possibly plastid	plastid	12	plastid	87.4979
Solyc02g082120.2.1	DNA-3-methyladenine glycosylase I (AHRD V1 ***- B6TPB7_MAIZE); contains Interpro domain(s) IPR005019 Methyladenine glycosylase	plastid	5	Y	none	plastid	11	N	99.698
Solyc02g082200.2.1	Glutaredoxin (AHRD V1 ***- A9LC71_PTEVI); contains Interpro domain(s) IPR004480 Glutaredoxin-related protein	plastid	2	Y	plastid	plastid	13	plastid	75.3141
Solyc02g082220.2.1	Protein transport protein SEC24 (AHRD V1 ***- C5FL43_NANOT); contains Interpro domain(s) IPR006896 Sec23/Sec24 trunk region	plastid	3	Y	possibly plastid	plastid	13	plastid	82.5709
Solyc02g082230.2.1	Serine/threonine-protein phosphatase (AHRD V1 ***- D7MQI5_ARALY); contains Interpro domain(s) IPR006186 Serine/threonine-specific protein phosphatase and bis(5-nucleosyl)-tetraphosphatase	plastid	3	Y	none	plastid	3	C	99.9179
Solyc02g082260.2.1	Hydroxy-methylglutaryl-coenzyme A reductase (AHRD V1 **** O48624_TOBAC); contains Interpro domain(s) IPR004554 Hydroxymethylglutaryl-CoA reductase, class I, catalytic	-	2	Y	none	plastid	3	P	99.0522
Solyc02g082270.2.1	RNA-binding protein 68390-68829 (AHRD V1 *--* Q9C805_ARATH); contains Interpro domain(s) IPR000504 RNA recognition motif, RNP-1	-	3	Y	none	not plastid	0	plastid	99.5481
Solyc02g082300.2.1	AT-hook motif nuclear localized protein 2 (AHRD V1 *-*- A1A6F0_ORYSJ); contains Interpro domain(s) IPR005175 Protein of unknown function DUF296	plastid	3	Y	none	plastid	3	N	66.0621
Solyc02g082310.1.1	Receptor-like kinase (AHRD V1 *-*- A7VM55_9VIRI); contains Interpro domain(s) IPR002290 Serine/threonine protein kinase	plastid	4	Y	none	plastid	1	N	56.1587
Solyc02g082320.1.1	F-box family protein (AHRD V1 ***- B9IAP0_POPTR); contains Interpro domain(s) IPR017451 F-box associated type 1	S	5	-	possibly plastid	plastid	10	plastid	76.736
Solyc02g082480.2.1	Glutamate-gated kainate-type ion channel receptor subunit GluR5 (AHRD V1 **** B9H686_POPTR); contains Interpro domain(s) IPR017103 Ionotropic glutamate-like receptor, plant	M	4	Y	none	plastid	3	PM	88.4879
Solyc02g082640.1.1	Unknown Protein (AHRD V1)	M	5	Y	possibly plastid	plastid	4	plastid	84.039
Solyc02g082760.2.1	Catalase (AHRD V1 **** O24511_TOBAC); contains Interpro domain(s) IPR018028 Catalase related subgroup	-	5	Y	none	plastid	6	P	95.9105
Solyc02g082810.2.1	CCA-adding enzyme (AHRD V1 *--- CCA_STAHJ); contains Interpro domain(s) IPR002646 Polynucleotide adenylyltransferase region	M	3	Y	M	plastid	8	C	78.2726
Solyc02g082830.1.1	Phosphoserine aminotransferase (AHRD V1 **** B9H657_POPTR); contains Interpro domain(s) IPR003248 Phosphoserine aminotransferase	plastid	3	Y	plastid	plastid	16	plastid	93.1491
Solyc02g082860.2.1	Isocitrate dehydrogenase (AHRD V1 **** A3LYS8_PICST); contains Interpro domain(s) IPR004434 Isocitrate dehydrogenase NAD-dependent, mitochondrial	M	3	Y	M	plastid	16	M	99.3705
Solyc02g082870.2.1	Acyl-CoA synthetase/AMP-acid ligase II (AHRD V1 **** Q2W3Z0_MAGSA); contains Interpro domain(s) IPR000873 AMP-dependent synthetase and ligase	plastid	5	-	none	plastid	9	C	65.8916
Solyc02g082910.2.1	Acyl-CoA synthetase/AMP-acid ligase II (AHRD V1 **** D0C359_9GAMM); contains Interpro domain(s) IPR000873 AMP-dependent synthetase and ligase	-	5	-	possibly plastid	plastid	3	EX	62.9292
Solyc02g082950.2.1	Os03g0291800 protein (Fragment) (AHRD V1 ***- Q0DSS4_ORYSJ); contains Interpro domain(s) IPR004253 Protein of unknown function DUF231, plant	M	5	Y	possibly M	plastid	6	G	96.8081
Solyc02g082970.1.1	Pentatricopeptide repeat-containing protein (AHRD V1 ***- D7L9H0_ARALY); contains Interpro domain(s) IPR002885 Pentatricopeptide repeat	plastid	2	Y	possibly M	plastid	9	plastid	68.969
Solyc02g083000.1.1	CM0216.330.nc protein (AHRD V1 ***- B0BLI1_LOTJA); contains Interpro domain(s) IPR004320 Protein of unknown function DUF241, plant	plastid	5	-	none	plastid	6	N	60.6128
Solyc02g083030.1.1	CM0216.330.nc protein (AHRD V1 ***- B0BLI1_LOTJA); contains Interpro domain(s) IPR004320 Protein of unknown function DUF241, plant	plastid	5	-	none	plastid	6	N	62.9139
Solyc02g083040.1.1	CM0216.330.nc protein (AHRD V1 ***- B0BLI1_LOTJA); contains Interpro domain(s) IPR004320 Protein of unknown function DUF241, plant	plastid	4	Y	none	plastid	10	C	66.8147
Solyc02g083050.1.1	CM0216.330.nc protein (AHRD V1 ***- B0BLI1_LOTJA); contains Interpro domain(s) IPR004320 Protein of unknown function DUF241, plant	plastid	4	-	none	plastid	8	N	51.9067
Solyc02g083070.2.1	Unknown Protein (AHRD V1); contains Interpro domain(s) IPR004320 Protein of unknown function DUF241, plant	plastid	5	-	none	plastid	10	C	59.3521
Solyc02g083090.1.1	CM0216.330.nc protein (AHRD V1 ***- B0BLI1_LOTJA); contains Interpro domain(s) IPR004320 Protein of unknown function DUF241, plant	plastid	3	-	none	plastid	10	M	55.1573
Solyc02g083100.2.1	CM0216.330.nc protein (AHRD V1 ***- B0BLI1_LOTJA); contains Interpro domain(s) IPR004320 Protein of unknown function DUF241, plant	M	5	Y	none	plastid	4	M	73.2753
Solyc02g083120.1.1	CM0216.240.nc protein (AHRD V1 ***- B0BLH5_LOTJA); contains Interpro domain(s) IPR004320 Protein of unknown function DUF241, plant	M	4	Y	possibly plastid	plastid	6	plastid	40.1551
Solyc02g083130.2.1	IST1 homolog (AHRD V1 *--- C1BSR8_9MAXI); contains Interpro domain(s) IPR005061 Protein of unknown function DUF292, eukaryotic	M	3	Y	plastid	plastid	13	M	52.1698
Solyc02g083140.2.1	Ribonuclease E (AHRD V1 ***- B0LV36_SOLLC); contains Interpro domain(s) IPR019793 Peroxidases heam-ligand binding site	plastid	2	Y	possibly plastid	plastid	9	C	83.0053
Solyc02g083200.2.1	Unknown Protein (AHRD V1)	M	3	Y	none	plastid	1	M	39.2069
Solyc02g083270.2.1	Vitamin K epoxide reductase (AHRD V1 **-- B4AXQ4_9CHRO); contains Interpro domain(s) IPR012932 Vitamin K epoxide reductase	plastid	1	Y	plastid	plastid	14	plastid	99.8793
Solyc02g083280.2.1	Thiosulfate sulfurtransferase/rhodanese-like domain-containing protein 1 (AHRD V1 *--* TSTD1_HUMAN); contains Interpro domain(s) IPR001763 Rhodanese-like	plastid	3	Y	plastid	plastid	11	C	97.7882
Solyc02g083300.1.1	Unknown Protein (AHRD V1)	M	4	Y	none	plastid	8	EX	86.8418
Solyc02g083310.2.1	Wound responsive protein (Fragment) (AHRD V1 *--- A6N0L4_ORYSI); contains Interpro domain(s) IPR003729 Protein of unknown function DUF151	plastid	3	Y	none	not plastid	0	C	90.4947
Solyc02g083320.2.1	RNA-binding protein (AHRD V1 *--* B6JZH8_SCHJY); contains Interpro domain(s) IPR012677 Nucleotide-binding, alpha-beta plait	plastid	2	Y	none	not plastid	0	N	92.7689
Solyc02g083400.2.1	RING finger protein 38 (AHRD V1 *-*- RNF38_HUMAN); contains Interpro domain(s) IPR001841 Zinc finger, RING-type	-	4	Y	possibly plastid	not plastid	0	P	37.6286
Solyc02g083410.2.1	Receptor-like kinase (AHRD V1 *-*- A7VM40_MARPO); contains Interpro domain(s) IPR002290 Serine/threonine protein kinase	plastid	3	Y	plastid	plastid	6	plastid	52.1376
Solyc02g083500.2.1	Genomic DNA chromosome 5 TAC clone K2A18 (AHRD V1 ***- Q9FKX3_ARATH); contains Interpro domain(s) IPR006016 UspA	plastid	2	Y	plastid	plastid	16	plastid	89.4386
Solyc02g083520.2.1	BZIP transcription factor (AHRD V1 *-** Q32WR6_MALDO); contains Interpro domain(s) IPR011616 bZIP transcription factor, bZIP-1	plastid	4	Y	possibly plastid	plastid	3	N	100
Solyc02g083580.2.1	Ras-like GTP-binding protein RHO (AHRD V1 **-- RHO_APLCA); contains Interpro domain(s) IPR003578 Ras small GTPase, Rho type	-	5	Y	none	plastid	5	C	97.9747
Solyc02g083590.2.1	Dehydroquinate synthase (AHRD V1 ***- Q8RU74_SOLLC); contains Interpro domain(s) IPR016037 3-dehydroquinate synthase AroB, subgroup	plastid	2	Y	plastid	plastid	14	plastid	99.9969
Solyc02g083600.2.1	Replication factor C large subunit (AHRD V1 *--- D4GSN1_HALVD); contains Interpro domain(s) IPR004582 Checkpoint protein Rad24	plastid	4	Y	none	plastid	2	N	75.8954
Solyc02g083610.2.1	BZIP transcription factor (AHRD V1 *-*- D3YBE4_TRIRP); contains Interpro domain(s) IPR006867 Protein of unknown function DUF632	M	5	-	possibly plastid	not plastid	0	N	74.6954
Solyc02g083640.2.1	Male sterility 5 family protein (Fragment) (AHRD V1 *-*- B1Q3A0_BRACM); contains Interpro domain(s) IPR011990 Tetratricopeptide-like helical	plastid	2	Y	possibly plastid	plastid	8	N	50.2532
Solyc02g083680.1.1	Multi-sensor hybrid histidine kinase (AHRD V1 *-** A8ZX44_DESOH); contains Interpro domain(s) IPR004358 Signal transduction histidine kinase-related protein, C-terminal	plastid	4	Y	none	not plastid	0	plastid	89.488
Solyc02g083790.2.1	Thaumatin-like protein (AHRD V1 ***- Q9ZQY9_ARATH); contains Interpro domain(s) IPR001938 Thaumatin, pathogenesis-related	S	1	Y	ER	plastid	3	EX	96.4577
Solyc02g083810.2.1	Ferredoxin--NADP reductase (AHRD V1 ***- D7MN04_ARALY); contains Interpro domain(s) IPR012146 Ferredoxin--NADP reductase	plastid	1	Y	plastid	plastid	21	plastid	100
Solyc02g083850.2.1	Calcium-dependent protein kinase (AHRD V1 **** C6KGT3_SOLLC); contains Interpro domain(s) IPR002290 Serine/threonine protein kinase	plastid	1	Y	plastid	plastid	12	C	99.4782
Solyc02g083930.1.1	Unknown Protein (AHRD V1)	plastid	4	Y	none	plastid	2	M	67.9923
Solyc02g083970.1.1	Chromosome 18 contig 1 DNA sequence (AHRD V1 *-*- Q00SS6_OSTTA)	plastid	3	Y	possibly plastid	plastid	8	plastid	98.4193
Solyc02g084150.1.1	Unknown Protein (AHRD V1)	S	3	Y	ER	plastid	14	EX	93.4416
Solyc02g084290.1.1	Unknown Protein (AHRD V1)	plastid	5	-	none	plastid	9	plastid	33.3688
Solyc02g084360.2.1	V-type proton ATPase 16 kDa proteolipid subunit c2 (AHRD V1 **** VATL2_ARATH); contains Interpro domain(s) IPR011555 ATPase, V0 complex, proteolipid subunit C, eukaryotic	S	2	Y	none	not plastid	0	PM	86.9419
Solyc02g084440.2.1	Fructose-bisphosphate aldolase (AHRD V1 ***- Q9SXX4_NIplastidA); contains Interpro domain(s) IPR000741 Fructose-bisphosphate aldolase, class-I	plastid	3	Y	plastid	plastid	8	plastid	77.4656
Solyc02g084580.1.1	Unknown Protein (AHRD V1)	S	2	Y	ER	plastid	2	EX	99.0349
Solyc02g084660.2.1	Glutaredoxin I (AHRD V1 *-*- O65169_MESCR); contains Interpro domain(s) IPR011899 Glutaredoxin, eukaryotic and viruses	M	4	Y	none	plastid	6	M	78.9548
Solyc02g084670.2.1	Dehydration-responsive family protein (AHRD V1 **-- D7LF23_ARALY); contains Interpro domain(s) IPR004159 Protein of unknown function DUF248, methyltransferase putative	plastid	5	Y	none	plastid	8	M	28.0274
Solyc02g084750.2.1	(Dimethylallyl)adenosine tRNA methylthiotransferase miaB (AHRD V1 ***- MIAB_SALRD); contains Interpro domain(s) IPR006463 tRNA-i(6)A37 modification enzyme MiaB	plastid	1	Y	plastid	plastid	13	plastid	88.2925
Solyc02g084760.2.1	Ubiquitin-conjugating enzyme E2 W (AHRD V1 **** B6SI81_MAIZE); contains Interpro domain(s) IPR000608 Ubiquitin-conjugating enzyme, E2	plastid	5	-	none	plastid	2	N	90.1125
Solyc02g084800.2.1	Peroxidase (AHRD V1 ***- Q0ZA68_9ROSI); contains Interpro domain(s) IPR002016 Haem peroxidase, plant/fungal/bacterial	-	4	-	possibly plastid	plastid	2	C	82.8415
Solyc02g084860.1.1	BZIP transcription factor (AHRD V1 **-* C0KYN1_SOLLC); contains Interpro domain(s) IPR011616 bZIP transcription factor, bZIP-1	plastid	3	Y	none	not plastid	0	N	100
Solyc02g084900.2.1	Cell division protease ftsH homolog (AHRD V1 *--- FTSH_BAplastidE); contains Interpro domain(s) IPR003959 ATPase, AAA-type, core	S	3	-	possibly plastid	plastid	5	C	99.9601
Solyc02g084970.2.1	PAP2 domain protein (AHRD V1 *--- B6Q1Y8_PENMQ); contains Interpro domain(s) IPR000326 Phosphatidic acid phosphatase type 2/haloperoxidase	plastid	5	-	plastid	not plastid	0	PM	99.4853
Solyc02g084980.2.1	Galactinol synthase (AHRD V1 ***- C7G304_SOLLC); contains Interpro domain(s) IPR002495 Glycosyl transferase, family 8	-	5	-	plastid	plastid	5	M	77.3644
Solyc02g085000.2.1	Genomic DNA chromosome 5 TAC clone K1F13 (AHRD V1 ***- Q9FJZ1_ARATH)	-	3	-	possibly plastid	not plastid	0	N	88.2452
Solyc02g085070.1.1	Hydrolase alpha/beta fold family protein (AHRD V1 ***- D7MBG9_ARALY); contains Interpro domain(s) IPR000639 Epoxide hydrolase-like	plastid	3	Y	none	plastid	10	C	63.2025
Solyc02g085080.2.1	Transmembrane protein 53 (AHRD V1 *-*- B5X6E4_SALSA); contains Interpro domain(s) IPR008547 Protein of unknown function DUF829, transmembrane 53	plastid	3	Y	plastid	plastid	17	plastid	71.9126
Solyc02g085100.2.1	Aldose 1-epimerase family protein (AHRD V1 **** D7MMG0_ARALY); contains Interpro domain(s) IPR014718 Glycoside hydrolase-type carbohydrate-binding, subgroup	plastid	4	Y	plastid	plastid	7	plastid	93.9859
Solyc02g085160.1.1	Zinc finger-homeodomain protein 1 (Fragment) (AHRD V1 **-- B0LK17_YUCFI); contains Interpro domain(s) IPR006456 ZF-HD homeobox protein Cys/His-rich dimerisation region	-	4	Y	none	plastid	1	N	94.2449
Solyc02g085190.1.1	GATA transcription factor 19 (AHRD V1 *-** B6TS85_MAIZE); contains Interpro domain(s) IPR000679 Zinc finger, GATA-type	plastid	4	Y	none	plastid	5	C	95.9208
Solyc02g085330.1.1	AT5g66780/MUD21_2 (AHRD V1 ***- Q9FL02_ARATH)	M	1	Y	M	plastid	3	N	99.0456
Solyc02g085350.2.1	Succinate dehydrogenase flavoprotein subunit (AHRD V1 **** B8CCT7_THAPS); contains Interpro domain(s) IPR011281 Succinate dehydrogenase, flavoprotein subunit	M	2	Y	possibly M	plastid	8	M	99.9775
Solyc02g085430.2.1	Receptor-like protein kinase At3g21340 (AHRD V1 *-** RLK6_ARATH); contains Interpro domain(s) IPR002290 Serine/threonine protein kinase	plastid	2	Y	none	plastid	3	N	91.623
Solyc02g085460.1.1	Unknown Protein (AHRD V1)	M	4	Y	possibly M	not plastid	0	plastid	73.2112
Solyc02g085480.2.1	BAC19.4 (AHRD V1 ***- Q9FYX2_SOLLC); contains Interpro domain(s) IPR010608 Protein of unknown function DUF1195	-	2	Y	none	plastid	3	P	46.1163
Solyc02g085500.2.1	Ovate protein (AHRD V1 ***- Q8GSM4_SOLLC)	M	5	Y	M	plastid	2	N	98.7746
Solyc02g085520.2.1	Adenylosuccinate synthetase, chloroplastic (AHRD V1 **** PURA_SOLBU); contains Interpro domain(s) IPR001114 Adenylosuccinate synthetase	-	5	Y	none	plastid	9	C	99.9749
Solyc02g085540.1.1	NADH ubiquinone oxidoreductase kD subunit (AHRD V1 **-- C5FGY8_NANOT)	M	2	Y	possibly M	plastid	8	M	94.9456
Solyc02g085550.1.1	Pentatricopeptide repeat-containing protein (AHRD V1 ***- D7MBF2_ARALY); contains Interpro domain(s) IPR002885 Pentatricopeptide repeat	plastid	5	-	M	plastid	10	plastid	67.9853
Solyc02g085580.2.1	C2H2L domain class transcription factor (AHRD V1 **-* D9ZIU5_MALDO); contains Interpro domain(s) IPR007087 Zinc finger, C2H2-type	plastid	5	Y	none	not plastid	0	N	99.9984
Solyc02g085600.1.1	GRAS family transcription factor (AHRD V1 **-* B9HET8_POPTR); contains Interpro domain(s) IPR005202 GRAS transcription factor	plastid	2	Y	none	plastid	3	plastid	51.7182
Solyc02g085640.2.1	Xaa-Pro aminopeptidase 1 (AHRD V1 ***- Q93X46_SOLLC); contains Interpro domain(s) IPR001131 Peptidase M24B, X-Pro dipeptidase/aminopeptidase P, conserved site IPR000994 Peptidase M24, structural domain	-	4	-	possibly plastid	plastid	10	C	40.7095
Solyc02g085650.2.1	Pentatricopeptide repeat-containing protein (AHRD V1 *-*- D7MBF2_ARALY); contains Interpro domain(s) IPR000994 Peptidase M24, structural domain	plastid	4	-	M	plastid	6	plastid	49.7383
Solyc02g085660.1.1	UDP-glucosyltransferase (AHRD V1 **** B8QI32_9MAGN); contains Interpro domain(s) IPR002213 UDP-glucuronosyl/UDP-glucosyltransferase	S	5	Y	none	plastid	11	G	99.6753
Solyc02g085670.2.1	Major facilitator superfamily MFS_1 (AHRD V1 **-- A4FJQ9_SACEN); contains Interpro domain(s) IPR016196 Major facilitator superfamily, general substrate transporter	M	2	Y	M	plastid	4	PM	77.0148
Solyc02g085690.2.1	Ubiquitin-conjugating enzyme E2 4 (AHRD V1 ***- UBC4_SCHPO); contains Interpro domain(s) IPR015580 RUB1 conjugating enzyme Ubc12	S	3	-	plastid	plastid	4	V	34.5512
Solyc02g085700.1.1	Geranylgeranyl pyrophosphate synthase (AHRD V1 ***- D0FZ25_9ASTE); contains Interpro domain(s) IPR000092 Polyprenyl synthetase	plastid	5	Y	possibly plastid	plastid	10	plastid	98.6339
Solyc02g085710.2.1	Geranylgeranyl pyrophosphate synthase (AHRD V1 ***- Q9SSU0_9ROSI); contains Interpro domain(s) IPR000092 Polyprenyl synthetase	plastid	5	Y	none	plastid	12	C	64.4381
Solyc02g085720.1.1	Geranylgeranyl pyrophosphate synthase (AHRD V1 ***- Q9SSU0_9ROSI); contains Interpro domain(s) IPR000092 Polyprenyl synthetase	M	2	Y	possibly M	plastid	11	M	91.8424
Solyc02g085730.2.1	Allene oxide cyclase (AHRD V1 **** Q9LEG5_SOLLC); contains Interpro domain(s) IPR009410 Allene oxide cyclase	plastid	1	Y	plastid	plastid	10	plastid	99.2394
Solyc02g085740.2.1	Unknown Protein (AHRD V1)	plastid	2	Y	possibly plastid	plastid	12	V	67.965
Solyc02g085750.2.1	LuxR family transcriptional regulator (Fragment) (AHRD V1 *-*- D9ZBL8_9CARY)	plastid	5	-	none	plastid	1	N	97.6011
Solyc02g085940.2.1	Unknown Protein (AHRD V1)	plastid	3	Y	none	plastid	7	plastid	92.7408
Solyc02g085950.2.1	Ribulose bisphosphate carboxylase small chain (AHRD V1 ***- A9YTZ7_SOLTU); contains Interpro domain(s) IPR000894 Ribulose bisphosphate carboxylase, small chain	plastid	2	Y	plastid	plastid	14	plastid	100
Solyc02g086050.2.1	Homology to unknown gene (Fragment) (AHRD V1 *-*- Q01BV2_OSTTA)	plastid	2	Y	plastid	plastid	6	plastid	97.501
Solyc02g086070.2.1	Genomic DNA chromosome 5 P1 clone MXI10 (AHRD V1 ***- Q9FF25_ARATH)	-	4	Y	none	plastid	8	plastid	47.4072
Solyc02g086080.2.1	Alpha/beta hydrolase fold (AHRD V1 ***- A1T9R4_MYCVP); contains Interpro domain(s) IPR000073 Alpha/beta hydrolase fold-1	plastid	5	-	possibly plastid	plastid	7	plastid	62.8911
Solyc02g086160.2.1	D-xylose transporter (AHRD V1 **** D0DTW3_LACFE); contains Interpro domain(s) IPR003663 Sugar/inositol transporter	plastid	3	Y	none	plastid	11	plastid	88.152
Solyc02g086200.1.1	Chloroplastic group IIA intron splicing facilitator CRS1, chloroplastic (AHRD V1 ***- CRS1_ARATH); contains Interpro domain(s) IPR001890 RNA-binding, CRM domain	plastid	3	Y	possibly plastid	not plastid	0	C	69.4943
Solyc02g086220.2.1	Abhydrolase domain-containing protein FAM108B1 (AHRD V1 **-- C0HAS5_SALSA)	-	4	-	possibly plastid	plastid	4	plastid	94.5198
Solyc02g086260.1.1	Unknown Protein (AHRD V1)	plastid	3	Y	M	plastid	15	M	86.8143
Solyc02g086300.2.1	Glutamine amidotransferase (AHRD V1 *-*- C6YZA6_9BACE); contains Interpro domain(s) IPR011697 Peptidase C26	-	3	-	possibly plastid	plastid	2	G	56.5607
Solyc02g086370.2.1	ER Phosphatidate Phosphatase (AHRD V1 **** B9SJX0_RICCO); contains Interpro domain(s) IPR000326 Phosphatidic acid phosphatase type 2/haloperoxidase	M	5	Y	M	not plastid	0	PM	40.0833
Solyc02g086420.1.1	Unknown Protein (AHRD V1)	plastid	3	Y	-	plastid	6	plastid	95.8727
Solyc02g086430.2.1	Zinc finger protein 36 C3H type-like 1 (Fragment) (AHRD V1 *-*- C5H180_ACRGR); contains Interpro domain(s) IPR000571 Zinc finger, CCCH-type	plastid	3	-	none	plastid	7	N	99.9295
Solyc02g086480.1.1	LOB domain protein (AHRD V1 ***- Q9AS62_ORYSJ); contains Interpro domain(s) IPR004883 Lateral organ boundaries, LOB	plastid	3	-	none	plastid	10	N	95.5352
Solyc02g086540.1.1	Double-strand-break repair protein rad21 (AHRD V1 *-*- C5FNZ1_NANOT); contains Interpro domain(s) IPR006910 Rad21/Rec8 like protein, N-terminal	-	4	Y	possibly plastid	plastid	2	N	94.6555
Solyc02g086560.2.1	Cobalamin (Vitamin B12) biosynthesis CbiX protein (AHRD V1 *--- A6C9M5_9PLAN); contains Interpro domain(s) IPR002762 Cobalamin (vitamin B12) biosynthesis CbiX	plastid	5	Y	possibly plastid	plastid	12	plastid	96.4343
Solyc02g086580.2.1	ATP-dependent DNA helicase MER3 (AHRD V1 **** C5FL91_NANOT); contains Interpro domain(s) IPR011545 DNA/RNA helicase, DEAD/DEAH box type, N-terminal	-	5	Y	none	not plastid	0	N	99.8993
Solyc02g086600.2.1	Polyribonucleotide nucleotidyltransferase (AHRD V1 ***- Q1PVN2_9BACT); contains Interpro domain(s) IPR012162 Polyribonucleotide nucleotidyltransferase	M	3	Y	possibly M	plastid	13	N	82.8759
Solyc02g086610.2.1	Isocitrate dehydrogenase-like protein (AHRD V1 **** Q8LPJ5_ARATH); contains Interpro domain(s) IPR004790 Isocitrate dehydrogenase NADP-dependent, eukaryotic	plastid	2	Y	plastid	plastid	12	plastid	86.1674
Solyc02g086650.2.1	Glucose-6-phosphate/phosphate translocator 2 (AHRD V1 **** B6TIJ4_MAIZE); contains Interpro domain(s) IPR004696 Tpt phosphate/phosphoenolpyruvate translocator	plastid	2	Y	possibly plastid	plastid	8	plastid	99.999
Solyc02g086680.2.1	Peptide deformylase-like (AHRD V1 **** Q5VNP3_ORYSJ); contains Interpro domain(s) IPR000181 Formylmethionine deformylase	plastid	3	Y	plastid	plastid	9	plastid	99.2463
Solyc02g086730.1.1	50S ribosomal protein L12-C (AHRD V1 ***- Q8LBJ7_ARATH); contains Interpro domain(s) IPR015608 Ribosomal protein L12, chloroplast	plastid	1	Y	plastid	plastid	14	plastid	99.6187
Solyc02g086740.1.1	50S ribosomal protein L12-C (AHRD V1 ***- Q8LBJ7_ARATH); contains Interpro domain(s) IPR015608 Ribosomal protein L12, chloroplast	plastid	1	Y	plastid	plastid	14	plastid	99.7984
Solyc02g086760.1.1	Unknown Protein (AHRD V1)	plastid	5	Y	none	not plastid	0	N	65.7238
Solyc02g086820.2.1	Carbonic anhydrase (AHRD V1 ***- Q5NE20_SOLLC); contains Interpro domain(s) IPR015892 Carbonic anhydrase, prokaryotic-like, conserved site	plastid	1	Y	plastid	plastid	12	plastid	100
Solyc02g086830.2.1	Protease Do-like (S2 serine-type protease) (AHRD V1 **** Q7UQ70_RHOBA); contains Interpro domain(s) IPR001254 Peptidase S1 and S6, chymotrypsin/Hap	plastid	2	Y	plastid	plastid	10	plastid	99.9393
Solyc02g086890.2.1	Calcium homeostasis regulator chor1 (Fragment) (AHRD V1 *-*- A6N1L7_ORYSI)	plastid	2	Y	plastid	plastid	9	plastid	96.2083
Solyc02g086910.2.1	Peptidyl-prolyl cis-trans isomerase cyclophilin-type (AHRD V1 ***- A8IRU6_CHLRE); contains Interpro domain(s) IPR002130 Peptidyl-prolyl cis-trans isomerase, cyclophilin-type	plastid	3	Y	plastid	plastid	13	plastid	98.8899
Solyc02g086930.2.1	Homeobox-leucine zipper-like protein (AHRD V1 *-*- Q3HRT1_PICGL); contains Interpro domain(s) IPR001356 Homeobox IPR017970 Homeobox, conserved site	-	5	Y	none	not plastid	0	N	100
Solyc02g086980.2.1	Unknown Protein (AHRD V1)	plastid	5	Y	none	plastid	13	plastid	96.5327
Solyc02g087010.2.1	NHL repeat-containing protein (AHRD V1 ***- D7KY00_ARALY); contains Interpro domain(s) IPR001258 NHL repeat	S	1	Y	ER	plastid	4	G	70.6919
Solyc02g087150.2.1	Heavy-metal-associated domain-containing protein (AHRD V1 *-*- D7M6P1_ARALY); contains Interpro domain(s) IPR006121 Heavy metal transport/detoxification protein	plastid	3	Y	possibly plastid	plastid	10	plastid	89.045
Solyc02g087190.1.1	Peroxidase 65 (AHRD V1 **** B6TYF5_MAIZE); contains Interpro domain(s) IPR002016 Haem peroxidase, plant/fungal/bacterial	M	5	Y	ER	plastid	9	EX	83.3977
Solyc02g087220.2.1	Protein bicaudal C homolog 1-B (AHRD V1 *--- BIC1B_XENLA); contains Interpro domain(s) IPR001660 Sterile alpha motif SAM	M	4	Y	possibly M	plastid	6	N	65.372
Solyc02g087230.2.1	Ferredoxin-thioredoxin reductase catalytic chain (AHRD V1 ***- B6TNR7_MAIZE); contains Interpro domain(s) IPR004209 Ferredoxin thioredoxin reductase, beta subunit	plastid	3	Y	possibly M	plastid	11	plastid	99.9999
Solyc02g087240.2.1	NADH-quinone oxidoreductase F subunit family protein (AHRD V1 **** Q23KE4_TETTH); contains Interpro domain(s) IPR011537 NADH ubiquinone oxidoreductase, F subunit	M	1	Y	M	plastid	8	M	99.9945
Solyc02g087260.1.1	TMV response-related protein (AHRD V1 *--- B6UBT3_MAIZE); contains Interpro domain(s) IPR006904 Protein of unknown function DUF716	plastid	5	Y	ER	not plastid	0	PM	87.9505
Solyc02g087290.2.1	Alpha-mannosidase-like protein (AHRD V1 **** Q9LFR0_ARATH); contains Interpro domain(s) IPR000602 Glycoside hydrolase, family 38, core	M	4	Y	possibly M	plastid	8	G	97.523
Solyc02g087340.2.1	Seed maturation protein PM23 (Fragment) (AHRD V1 ***- Q9SEL1_SOYBN)	plastid	5	Y	M	plastid	9	plastid	69.9275
Solyc02g087370.1.1	Paired amphipathic helix protein SIN3 (AHRD V1 *--- B3LJ52_YEAS1); contains Interpro domain(s) IPR003822 Paired amphipathic helix	-	3	Y	none	not plastid	0	N	99.8234
Solyc02g087380.1.1	Paired amphipathic helix protein SIN3 (AHRD V1 *--- B3LJ52_YEAS1); contains Interpro domain(s) IPR003822 Paired amphipathic helix	-	3	Y	none	plastid	6	N	75.9194
Solyc02g087400.1.1	Ankyrin repeat domain containing protein (AHRD V1 *--- B2WQ30_PYRTR); contains Interpro domain(s) IPR002110 Ankyrin	M	5	Y	none	plastid	4	C	94.8492
Solyc02g087510.2.1	Ribosomal protein S6 kinase alpha-2 (AHRD V1 *-** KS6A2_HUMAN); contains Interpro domain(s) IPR002290 Serine/threonine protein kinase	plastid	4	Y	none	not plastid	0	C	99.868
Solyc02g087560.1.1	Pentatricopeptide repeat-containing protein (AHRD V1 ***- D7MJE2_ARALY); contains Interpro domain(s) IPR002885 Pentatricopeptide repeat	plastid	2	Y	plastid	plastid	21	plastid	65.8562
Solyc02g087630.2.1	Thioredoxin H (AHRD V1 ***- Q4U0W0_NICAL); contains Interpro domain(s) IPR015467 Thioredoxin, core	plastid	4	-	none	not plastid	0	plastid	93.8208
Solyc02g087640.2.1	Protein midA homolog, mitochondrial (AHRD V1 **-- MIDA_DANRE); contains Interpro domain(s) IPR003788 Protein of unknown function DUF185	M	2	Y	M	plastid	5	M	94.0804
Solyc02g087680.1.1	FACT complex subunit SSRP1 (AHRD V1 ***- SSRP1_CATRO); contains Interpro domain(s) IPR000969 Structure-specific recognition protein	-	4	-	possibly plastid	plastid	10	plastid	46.2414
Solyc02g087760.2.1	Calmodulin binding protein (AHRD V1 **-* B6U6R2_MAIZE); contains Interpro domain(s) IPR000048 IQ calmodulin-binding region	plastid	5	-	M	not plastid	0	C	92.3656
Solyc02g087830.2.1	ATP binding / serine-threonine kinase (AHRD V1 **** C5DB71_VITVI); contains Interpro domain(s) IPR002290 Serine/threonine protein kinase	plastid	5	-	none	plastid	8	plastid	89.6042
Solyc02g087840.2.1	Homeobox-leucine zipper-like protein (AHRD V1 *-*- Q3HRT1_PICGL); contains Interpro domain(s) IPR001356 Homeobox	plastid	5	Y	none	not plastid	0	N	99.9999
Solyc02g087850.1.1	Glutaredoxin family protein (AHRD V1 **-- D7LM49_ARALY); contains Interpro domain(s) IPR012335 Thioredoxin fold	plastid	5	-	none	plastid	5	C	77.6115
Solyc02g087860.2.1	Transcription factor style2.1 (AHRD V1 **-* B6CG45_SOLPN); contains Interpro domain(s) IPR011598 Helix-loop-helix DNA-binding	plastid	3	-	none	plastid	4	N	99.9951
Solyc02g087980.2.1	Structural maintenance of chromosomes protein 4 (AHRD V1 **-- D8TXU8_VOLCA); contains Interpro domain(s) IPR003395 RecF/RecN/SMC protein, N-terminal	plastid	5	-	none	not plastid	0	N	99.9087
Solyc02g088000.2.1	Glycogen synthase (AHRD V1 **** D5MJP6_9BACT); contains Interpro domain(s) IPR011835 Glycogen/starch synthases, ADP-glucose type	plastid	4	Y	possibly plastid	plastid	13	plastid	99.7105
Solyc02g088040.1.1	Structural constituent of ribosome (AHRD V1 **-- D7LAI5_ARALY); contains Interpro domain(s) IPR008195 Ribosomal protein L34e	-	5	-	possibly plastid	not plastid	0	plastid	69.2278
Solyc02g088160.2.1	UPF0497 membrane protein Os06g0231050 (AHRD V1 *-*- U4974_ORYSJ); contains Interpro domain(s) IPR006459 Uncharacterised protein family UPF0497, trans-membrane plant subgroup	-	3	-	possibly plastid	not plastid	0	PM	99.8006
Solyc02g088280.2.1	Unknown Protein (AHRD V1)	-	3	-	possibly plastid	plastid	7	C	97.1054
Solyc02g088320.2.1	cDNA clone J075153F01 full insert sequence (AHRD V1 **-- B7F9A7_ORYSJ); contains Interpro domain(s) IPR009769 Protein of unknown function DUF1336	plastid	5	-	plastid	plastid	4	M	79.8868
Solyc02g088340.2.1	WRKY transcription factor-c (AHRD V1 **** Q5DJV3_CAPAN); contains Interpro domain(s) IPR003657 DNA-binding WRKY	plastid	3	Y	none	not plastid	0	N	99.9952
Solyc02g088350.2.1	Genomic DNA chromosome 3 P1 clone MXO21 (AHRD V1 ***- Q9LS78_ARATH)	plastid	2	Y	plastid	plastid	14	plastid	96.2177
Solyc02g088440.1.1	Unknown Protein (AHRD V1)	S	5	Y	none	plastid	2	EX	99.7524
Solyc02g088460.2.1	Chorismate mutase 1 (AHRD V1 **** D2CSU4_PETHY); contains Interpro domain(s) IPR008238 Chorismate mutase of the AroQ class, eukaryotic type	plastid	5	-	possibly plastid	plastid	11	plastid	99.6846
Solyc02g088490.2.1	Saccharopine dehydrogenase (AHRD V1 ***- B6T3D2_MAIZE); contains Interpro domain(s) IPR005097 Saccharopine dehydrogenase	plastid	5	-	none	not plastid	0	PM	99.9276
Solyc02g088520.2.1	Unknown Protein (AHRD V1)	plastid	4	Y	-	not plastid	0	N	99.5257
Solyc02g088540.2.1	tRNA guanosine-2&apos-O-methyltransferase (AHRD V1 *-*- B9L1B3_THERP); contains Interpro domain(s) IPR001537 tRNA/rRNA methyltransferase, SpoU	plastid	4	Y	possibly M	plastid	13	plastid	88.277
Solyc02g088590.2.1	Circadian clock coupling factor ZGT (AHRD V1 ***- B4F853_MAIZE)	plastid	2	Y	possibly plastid	plastid	19	PM	58.7793
Solyc02g088600.2.1	Pentatricopeptide repeat-containing protein (AHRD V1 ***- D7MRA3_ARALY); contains Interpro domain(s) IPR002885 Pentatricopeptide repeat	M	5	Y	possibly M	plastid	11	C	96.3346
Solyc02g088610.2.1	ATP-dependent chaperone ClpB (AHRD V1 **** B5W0X8_SPIMA); contains Interpro domain(s) IPR017730 Chaperonin ClpB	plastid	1	Y	plastid	plastid	13	plastid	97.8854
Solyc02g088630.2.1	Glycosyltransferase (AHRD V1 ***- B9IK47_POPTR); contains Interpro domain(s) IPR002495 Glycosyl transferase, family 8	-	4	Y	possibly plastid	plastid	9	G	99.9638
Solyc02g088700.2.1	Mitochondrial processing peptidase beta subunit (AHRD V1 ***- Q9AXQ2_CUCME); contains Interpro domain(s) IPR011237 Peptidase M16, core	M	2	Y	M	plastid	11	M	99.9996
Solyc02g088740.1.1	Genomic DNA chromosome 5 TAC clone K3 (AHRD V1 ***- Q9FL84_ARATH)	M	5	Y	M	plastid	3	M	34.4892
Solyc02g088760.2.1	50S ribosomal protein L12-2 (AHRD V1 ***- B6SHT7_MAIZE); contains Interpro domain(s) IPR015608 Ribosomal protein L12, chloroplast	M	2	Y	M	plastid	3	M	99.8119
Solyc02g088840.2.1	Unknown Protein (AHRD V1)	-	5	Y	none	not plastid	0	N	91.6105
Solyc02g088920.2.1	Ras GTPase-activating protein-binding protein 2 (AHRD V1 *--- B5X4A8_SALSA); contains Interpro domain(s) IPR018222 Nuclear transport factor 2, Eukaryote	-	2	-	possibly plastid	not plastid	0	C	97.4909
Solyc02g089020.1.1	Transcription factor (Fragment) (AHRD V1 *-*- D6MK40_9ASPA); contains Interpro domain(s) IPR005333 Transcription factor, Tplastid	plastid	5	Y	none	plastid	1	N	95.2788
Solyc02g089060.2.1	Hydrolase alpha/beta fold family protein (AHRD V1 **-- D7LP51_ARALY); contains Interpro domain(s) IPR000073 Alpha/beta hydrolase fold-1	plastid	5	Y	none	plastid	8	N	57.9829
Solyc02g089270.1.1	Unknown Protein (AHRD V1)	S	3	Y	ER	plastid	3	EX	95.3701
Solyc02g089310.1.1	F-box family protein (AHRD V1 ***- B9N7N7_POPTR); contains Interpro domain(s) IPR015915 Kelch-type beta propeller	plastid	2	Y	none	plastid	3	C	73.8185
Solyc02g089320.2.1	Abhydrolase domain-containing protein FAM108B1 (AHRD V1 **-- C0HAS5_SALSA)	-	5	-	none	plastid	10	plastid	49.8883
Solyc02g089360.2.1	Nuclear inhibitor of protein phosphatase 1 (AHRD V1 *--- Q9V7W9_DROME); contains Interpro domain(s) IPR000253 Forkhead-associated	plastid	4	Y	none	not plastid	0	N	70.9201
Solyc02g089420.1.1	BZip transcription factor (AHRD V1 ***- Q9AT29_PHAVU); contains Interpro domain(s) IPR011616 bZIP transcription factor, bZIP-1	-	2	Y	none	not plastid	0	N	99.9998
Solyc02g089430.1.1	Unknown Protein (AHRD V1)	-	5	Y	none	plastid	1	PM	67.1299
Solyc02g089440.2.1	Glycosyltransferase (AHRD V1 **-- B9NC17_POPTR); contains Interpro domain(s) IPR002495 Glycosyl transferase, family 8	M	1	Y	possibly M	plastid	8	G	96.2927
Solyc02g089450.1.1	Unknown Protein (AHRD V1)	M	5	-	possibly plastid	plastid	14	PM	98.9472
Solyc02g089460.1.1	Unknown Protein (AHRD V1)	M	5	Y	none	plastid	4	PM	87.5847
Solyc02g089560.2.1	Pentatricopeptide repeat-containing protein At5g15980, mitochondrial (AHRD V1 ***- PP387_ARATH)	M	2	Y	possibly M	plastid	10	M	45.2217
Solyc02g089720.1.1	Endo-beta-1 3-glucanase (AHRD V1 ***- B5THH0_PNECA); contains Interpro domain(s) IPR005200 Glycoside hydrolase, family 81	plastid	3	Y	possibly M	plastid	4	C	44.6248
Solyc02g089810.2.1	Translation initiation factor eIF-2B delta subunit (AHRD V1 **** B6U6N6_MAIZE); contains Interpro domain(s) IPR000649 Initiation factor 2B related	plastid	5	Y	none	plastid	4	C	72.7467
Solyc02g089840.2.1	Transcription factor (AHRD V1 **-- D7MBD5_ARALY); contains Interpro domain(s) IPR006769 Protein of unknown function DUF607	M	5	Y	M	plastid	3	M	94.3411
Solyc02g089860.1.1	GNS1/SUR4 membrane family protein (AHRD V1 ***- D7MBD4_ARALY); contains Interpro domain(s) IPR002076 GNS1/SUR4 membrane protein	-	4	Y	possibly M	plastid	11	PM	97.0228
Solyc02g089880.2.1	Glycosyltransferase family GT8 protein (AHRD V1 ***- D0ECQ6_POPDE); contains Interpro domain(s) IPR002495 Glycosyl transferase, family 8	S	5	Y	ER	plastid	10	V	49.3935
Solyc02g089900.1.1	Receptor-like kinase (AHRD V1 *-*- A7VM35_MARPO); contains Interpro domain(s) IPR002290 Serine/threonine protein kinase	S	2	Y	ER	not plastid	0	V	67.583
Solyc02g089920.1.1	Receptor-like protein kinase At3g21340 (AHRD V1 *-*- RLK6_ARATH); contains Interpro domain(s) IPR002290 Serine/threonine protein kinase	S	2	Y	ER	plastid	6	PM	93.3481
Solyc02g089960.2.1	Unknown Protein (AHRD V1)	S	4	Y	none	plastid	1	PM	60.665
Solyc02g090020.2.1	Stress regulated protein isoform 2 (AHRD V1 **-- Q2KP23_9SOLN)	plastid	4	-	none	plastid	12	plastid	59.7961
Solyc02g090030.2.1	Oxygen-evolving enhancer protein 1 of photosystem II (AHRD V1 ***- A8J0E4_CHLRE); contains Interpro domain(s) IPR002628 Photosystem II manganese-stabilizing protein PsbO	plastid	3	Y	plastid	plastid	13	plastid	99.9999
Solyc02g090100.1.1	Unknown Protein (AHRD V1)	plastid	3	Y	possibly M	plastid	5	plastid	97.0064
Solyc02g090230.2.1	Nucleoporin p58/p45 (AHRD V1 ***- B4FHB0_MAIZE)	M	5	Y	possibly plastid	not plastid	0	N	95.1557
Solyc02g090240.2.1	Pentatricopeptide repeat-containing protein (AHRD V1 ***- D7LT58_ARALY); contains Interpro domain(s) IPR002885 Pentatricopeptide repeat	plastid	5	-	none	plastid	12	plastid	98.0672
Solyc02g090310.1.1	Dof zinc finger protein 4 (AHRD V1 *-*- A5HWF3_HORVD); contains Interpro domain(s) IPR003851 Zinc finger, Dof-type	plastid	5	Y	none	not plastid	0	N	99.9893
Solyc02g090380.2.1	Nbs-lrr, resistance protein	S	4	-	possibly plastid	not plastid	0	C	41.4339
Solyc02g090420.2.1	50S ribosomal protein L25 (AHRD V1 ***- Q0EYU4_9PROT); contains Interpro domain(s) IPR011035 Ribosomal protein L25/Gln-tRNA synthetase, anti-codon-binding domain	M	3	Y	M	plastid	16	M	95.2636
Solyc02g090430.2.1	Protein serine/threonine kinase (AHRD V1 *-** D3BP85_POLPA); contains Interpro domain(s) IPR002290 Serine/threonine protein kinase	plastid	4	Y	possibly plastid	plastid	5	N	99.226
Solyc02g090540.2.1	Short-chain dehydrogenase/reductase family protein (AHRD V1 **** D7LTG0_ARALY); contains Interpro domain(s) IPR002347 Glucose/ribitol dehydrogenase	plastid	5	-	none	plastid	10	plastid	96.6552
Solyc02g090650.2.1	Os10g0382300 protein (Fragment) (AHRD V1 ***- Q0IY13_ORYSJ); contains Interpro domain(s) IPR006595 CTLH, C-terminal to LisH motif	plastid	5	Y	none	not plastid	0	C	98.5736
Solyc02g090670.2.1	Methionine aminopeptidase (AHRD V1 ***- B9H6F3_POPTR); contains Interpro domain(s) IPR002467 Peptidase M24A, methionine aminopeptidase, subfamily 1	plastid	5	Y	plastid	plastid	6	C	70.703
Solyc02g090720.2.1	Unknown Protein (AHRD V1)	-	4	Y	none	not plastid	0	N	97.3292
Solyc02g090730.2.1	Cell number regulator 1 (AHRD V1 **-- B6TZ45_MAIZE); contains Interpro domain(s) IPR006461 Protein of unknown function Cys-rich	-	4	-	none	plastid	6	plastid	59.4868
Solyc02g090750.2.1	ATP-dependent RNA helicase fal1 (AHRD V1 ***- B2WHT2_PYRTR)	-	4	-	none	plastid	3	plastid	36.8724
Solyc02g090780.1.1	Unknown Protein (AHRD V1)	plastid	3	Y	none	not plastid	0	N	99.6532
Solyc02g090840.2.1	Os11g0282300 protein (Fragment) (AHRD V1 ***- Q0ITA9_ORYSJ); contains Interpro domain(s) IPR012881 Protein of unknown function DUF1685	plastid	3	Y	plastid	plastid	10	plastid	90.4871
Solyc02g090870.1.1	Unknown Protein (AHRD V1)	M	4	Y	none	plastid	2	C	46.2196
Solyc02g090890.2.1	Zeaxanthin epoxidase, chloroplastic	plastid	5	-	plastid	plastid	3	M	68.2876
Solyc02g090900.2.1	Remorin (AHRD V1 ***- Q00M66_SOYBN); contains Interpro domain(s) IPR005516 Remorin, C-terminal region	-	5	Y	none	plastid	3	N	44.172
Solyc02g090970.1.1	Serine/threonine-protein kinase 24 (AHRD V1 **** STK24_MOUSE); contains Interpro domain(s) IPR002290 Serine/threonine protein kinase	-	5	Y	none	plastid	2	C	84.0278
Solyc02g090980.1.1	Protein serine/threonine kinase (AHRD V1 ***- D3BP85_POLPA); contains Interpro domain(s) IPR002290 Serine/threonine protein kinase	-	4	Y	none	plastid	3	C	84.0344
Solyc02g091000.2.1	Harpin-induced protein (AHRD V1 ***- B6TDG9_MAIZE); contains Interpro domain(s) IPR010847 Harpin-induced 1	plastid	3	Y	none	plastid	4	P	58.1789
Solyc02g091020.1.1	Nucleoporin autopeptidase family protein expressed (AHRD V1 *-*- Q2QX81_ORYSJ)	M	3	Y	none	not plastid	0	N	68.0305
Solyc02g091100.2.1	Oxalyl-CoA decarboxylase (AHRD V1 **-- D5PWM9_COREQ); contains Interpro domain(s) IPR012001 Thiamine pyrophosphate enzyme, N-terminal TPP binding region	-	3	Y	none	plastid	9	P	99.9777
Solyc02g091120.2.1	DNA ligase (AHRD V1 ***- B9SPY8_RICCO); contains Interpro domain(s) IPR000977 ATP-dependent DNA ligase	-	5	Y	none	not plastid	0	N	99.4468
Solyc02g091130.2.1	ATP synthase subunit beta (AHRD V1 ***- Q9ZR78_NICSY); contains Interpro domain(s) IPR005722 ATPase, F1 complex, beta subunit	M	5	Y	M	plastid	8	M	99.9952
Solyc02g091280.2.1	ATP-dependent Clp protease proteolytic subunit (AHRD V1 **** B9H362_POPTR); contains Interpro domain(s) IPR001907 Peptidase S14, ClpP	plastid	2	Y	possibly plastid	plastid	14	plastid	91.6571
Solyc02g091290.2.1	Methionyl-trna formyltransferase (AHRD V1 ***- B9GV84_POPTR); contains Interpro domain(s) IPR005794 Methionyl-tRNA formyltransferase	plastid	4	Y	M	plastid	13	M	96.8781
Solyc02g091300.2.1	Metal ion binding protein (AHRD V1 **-- B6U811_MAIZE); contains Interpro domain(s) IPR006121 Heavy metal transport/detoxification protein	-	5	-	plastid	plastid	7	C	99.6677
Solyc02g091390.2.1	Little protein 1 (AHRD V1 ***- B4UWC1_ARAHY)	plastid	5	-	plastid	not plastid	0	EX	72.8318
Solyc02g091400.1.1	Unknown Protein (AHRD V1)	S	1	Y	ER	plastid	3	EX	70.4067
Solyc02g091450.2.1	Unknown Protein (AHRD V1)	plastid	2	Y	none	not plastid	0	V	51.5239
Solyc02g091490.2.1	Fructokinase 3 (AHRD V1 **-* Q6VWJ5_SOLLC); contains Interpro domain(s) IPR011611 Carbohydrate/purine kinase	plastid	2	Y	plastid	plastid	14	plastid	94.8639
Solyc02g091580.2.1	Oligopeptidase A (AHRD V1 ***- Q9LSL3_ARATH); contains Interpro domain(s) IPR001567 Peptidase M3A and M3B, thimet/oligopeptidase F	M	5	Y	M	plastid	4	PM	90.7595
Solyc02g091610.1.1	Unknown Protein (AHRD V1)	M	5	Y	plastid	plastid	3	EX	97.4511
Solyc02g091620.1.1	DNA mismatch repair protein-like (AHRD V1 *-*- Q69MM0_ORYSJ); contains Interpro domain(s) IPR002099 DNA mismatch repair protein	plastid	4	-	possibly plastid	plastid	2	V	73.3758
Solyc02g091640.2.1	Endoribonuclease E-like protein (AHRD V1 **-- Q656E2_ORYSJ)	plastid	1	Y	none	plastid	12	N	69.8775
Solyc02g091710.2.1	von Willebrand factor type A domain-containing protein (AHRD V1 *--- D2VKS7_NAEGR); contains Interpro domain(s) IPR002035 von Willebrand factor, type A	-	5	Y	none	plastid	7	C	96.8251
Solyc02g091750.2.1	Starch synthase V (AHRD V1 ***- B2ZGM7_SOLTU)	plastid	2	Y	plastid	plastid	10	N	89.6381
Solyc02g091760.1.1	Starch synthase V (AHRD V1 ***- B2ZGM7_SOLTU); contains Interpro domain(s) IPR013534 Starch synthase catalytic region	-	3	-	none	plastid	1	plastid	99.7295
Solyc02g091810.1.1	Transcription factor (AHRD V1 *-** Q9M4A8_MAIZE); contains Interpro domain(s) IPR011598 Helix-loop-helix DNA-binding	-	4	Y	none	not plastid	0	N	99.9852
Solyc02g091830.2.1	Hexokinase (AHRD V1 ***- Q9FVD3_CITSI); contains Interpro domain(s) IPR001312 Hexokinase	plastid	5	-	none	plastid	12	M	84.5418
Solyc02g091880.2.1	Cytochrome c oxidase subunit VIa family protein expressed (AHRD V1 **** Q7XZW4_ORYSJ); contains Interpro domain(s) IPR001349 Cytochrome c oxidase, subunit VIa	M	5	Y	M	plastid	5	M	99.9997
Solyc02g091960.2.1	Nuclear matrix constituent protein 2 (AHRD V1 ***- D2YZU6_APIGR)	-	5	-	plastid	plastid	12	N	83.0096
Solyc02g091970.2.1	Branched-chain-amino-acid aminotransferase (AHRD V1 ***- Q9SNY8_SOLTU); contains Interpro domain(s) IPR005786 Branched-chain amino acid aminotransferase II	-	5	-	possibly plastid	plastid	12	plastid	82.3075
Solyc02g092000.2.1	Unknown Protein (AHRD V1)	M	3	Y	possibly ER	plastid	9	M	53.0272
Solyc02g092010.2.1	GTP-binding protein hflX (AHRD V1 *-*- B8GW93_CAUCN); contains Interpro domain(s) IPR016496 GTP-binding protein, HflX	plastid	5	Y	M	plastid	6	M	49.8683
Solyc02g092080.1.1	Primary rRNA-binding ribosomal protein component of the large (60S) ribosomal subunit (AHRD V1 *-** C4R910_PIplastidG); contains Interpro domain(s) IPR012678 Ribosomal protein L23/L15e, core	plastid	2	Y	plastid	plastid	11	C	96.4406
Solyc02g092260.2.1	Amino-acid N-acetyltransferase (AHRD V1 ***- B4WYV1_9GAMM); contains Interpro domain(s) IPR010167 Amino-acid N-acetyltransferase (ArgA)	M	5	Y	plastid	plastid	20	C	84.8584
Solyc02g092370.1.1	GRAS family transcription factor (AHRD V1 **-- B9NAS9_POPTR); contains Interpro domain(s) IPR005202 GRAS transcription factor	M	2	Y	none	plastid	5	N	62.057
Solyc02g092410.2.1	Adenylyl-sulfate kinase (AHRD V1 **** C6TL96_SOYBN); contains Interpro domain(s) IPR002891 Adenylylsulphate kinase, C-terminal	plastid	5	-	none	plastid	7	plastid	99.7923
Solyc02g092430.1.1	Ribosomal protein L26 (AHRD V1 ***- A8HMG7_CHLRE); contains Interpro domain(s) IPR005756 Ribosomal protein L26, eukaryotic/archaeal	M	4	Y	none	plastid	2	C	78.977
Solyc02g092500.1.1	Unknown Protein (AHRD V1)	plastid	2	Y	possibly plastid	plastid	5	C	48.9324
Solyc02g092520.1.1	Unknown Protein (AHRD V1)	-	3	-	none	plastid	10	N	65.4929
Solyc02g092570.1.1	GRAS family transcription factor (AHRD V1 **-* B9GYX5_POPTR); contains Interpro domain(s) IPR005202 GRAS transcription factor	plastid	4	Y	none	plastid	11	C	84.6168
Solyc02g092660.2.1	Major facilitator superfamily domain-containing protein (AHRD V1 ***- C9SAV7_VERA1); contains Interpro domain(s) IPR008509 Protein of unknown function DUF791	S	4	Y	none	not plastid	0	PM	99.831
Solyc02g092700.2.1	Ycf36 protein (AHRD V1 *-*- D4ZSA0_SPIPL); contains Interpro domain(s) IPR009631 Protein of unknown function DUF1230	plastid	4	-	none	plastid	10	plastid	62.2518
Solyc02g092710.2.1	Prolyl 4-hydroxylase alpha-2 subunit (AHRD V1 ***- B6TYA6_MAIZE); contains Interpro domain(s) IPR006620 Prolyl 4-hydroxylase, alpha subunit	M	2	Y	ER	plastid	5	G	99.4542
Solyc02g092830.2.1	Unknown Protein (AHRD V1)	plastid	5	Y	M	not plastid	0	M	86.3275
Solyc02g092920.2.1	Cadmium-transporting ATPase (AHRD V1 ***- Q5WLE3_BACSK); contains Interpro domain(s) IPR006404 ATPase, P-type, heavy metal-(Cd/Co/Hg/Pb/Zn)-translocating	plastid	1	Y	plastid	plastid	12	PM	99.2039
Solyc02g092990.1.1	SCF E3 ubiquitin ligase complex F-box protein grrA (AHRD V1 *-** C9SVX6_VERA1); contains Interpro domain(s) IPR001810 Cyclin-like F-box	M	3	Y	none	plastid	7	N	57.8203
Solyc02g093090.1.1	Expressed protein (Fragment) (AHRD V1 *-*- B3VV20_POPTN); contains Interpro domain(s) IPR006514 Protein of unknown function DUF579, plant	-	5	Y	none	plastid	7	G	96.423
Solyc02g093100.2.1	Receptor like kinase, RLK	S	1	Y	ER	not plastid	0	PM	88.3314
Solyc02g093140.2.1	CBS domain-containing protein-like (AHRD V1 ***- B8AP73_ORYSI); contains Interpro domain(s) IPR000644 Cystathionine beta-synthase, core	plastid	3	Y	plastid	plastid	13	plastid	86.3675
Solyc02g093170.2.1	Cyclin delta-3 (AHRD V1 **-- Q94JY0_ARATH)	M	3	Y	none	plastid	7	plastid	88.6348
Solyc02g093260.1.1	Unknown Protein (AHRD V1)	plastid	4	Y	-	not plastid	0	N	84.7854
Solyc02g093280.2.1	Transcription factor EB (AHRD V1 *-*- TFEB_HUMAN); contains Interpro domain(s) IPR011598 Helix-loop-helix DNA-binding	-	5	Y	none	not plastid	0	N	99.9998
Solyc02g093330.2.1	Nup98 (Fragment) (AHRD V1 *--- A1YK38_DROME); contains Interpro domain(s) IPR007230 Peptidase S59, nucleoporin	plastid	2	Y	plastid	not plastid	0	C	94.9669
Solyc02g093350.2.1	Homology to unknown gene (AHRD V1 *-*- Q00ZA5_OSTTA)	-	5	-	possibly plastid	plastid	2	C	61.0114
Solyc02g093370.2.1	Sucrose cleavage protein-like (AHRD V1 **-- Q9LT55_ARATH); contains Interpro domain(s) IPR009737 Sucraseferredoxin-like	-	5	-	none	plastid	1	plastid	81.8344
Solyc02g093390.2.1	Ribosomal RNA-processing protein (AHRD V1 ***- B6K4Z8_SCHJY); contains Interpro domain(s) IPR007823 Methyltransferase-related	plastid	3	Y	none	plastid	3	N	87.7684
Solyc02g093460.2.1	tRNA pseudouridine synthase B (AHRD V1 *-*- D0MI93_RHOM4); contains Interpro domain(s) IPR020103 Pseudouridine synthase, catalytic domain	plastid	3	Y	ER	plastid	16	M	49.1836
Solyc02g093470.2.1	Lysine ketoglutarate reductase trans-splicing related 1 (AHRD V1 ***- B6TPP1_MAIZE); contains Interpro domain(s) IPR007877 Protein of unknown function DUF707	M	4	Y	none	plastid	3	G	99.0574
Solyc02g093500.2.1	GDSL esterase/lipase At5g14450 (AHRD V1 ***- GDL76_ARATH); contains Interpro domain(s) IPR001087 Lipase, GDSL	S	5	Y	none	plastid	9	plastid	50.0956
Solyc02g093550.2.1	Methyltransferase type 11 (AHRD V1 ***- C7QSM0_CYAP0); contains Interpro domain(s) IPR013216 Methyltransferase type 11	plastid	5	Y	none	not plastid	0	M	54.9828
Solyc02g093560.1.1	Unknown Protein (AHRD V1); contains Interpro domain(s) IPR013177 Protein of unknown function DUF1713, mitochondria	plastid	5	Y	M	plastid	7	M	57.8708
Solyc02g093590.2.1	CONSTANS-like zinc finger protein (AHRD V1 *-*- D0EP06_SOYBN); contains Interpro domain(s) IPR010402 CCT domain	plastid	3	Y	none	not plastid	0	N	100
Solyc02g093600.2.1	class I heat shock protein (AHRD V1 ***- Q69BI7_CARPA); contains Interpro domain(s) IPR008978 HSP20-like chaperone	-	3	-	possibly plastid	plastid	6	C	99.9141
Solyc02g093620.1.1	Pentatricopeptide repeat-containing protein (AHRD V1 ***- D7M6I3_ARALY); contains Interpro domain(s) IPR002885 Pentatricopeptide repeat	plastid	4	-	plastid	plastid	7	C	96.5024
Solyc02g093640.2.1	3-ketoacyl-CoA reductase 1 (AHRD V1 **-- Q0VH88_GOSHI); contains Interpro domain(s) IPR002347 Glucose/ribitol dehydrogenase	S	2	-	ER	plastid	8	G	61.2402
Solyc02g093800.2.1	Serine/threonine-protein phosphatase 2A regulatory subunit delta 1 isoform (AHRD V1 ***- Q0CAR1_ASPTN); contains Interpro domain(s) IPR002554 Protein phosphatase 2A, regulatory B subunit, B56	plastid	2	Y	none	plastid	6	N	95.3085
Solyc02g093890.1.1	Unknown Protein (AHRD V1)	-	3	Y	none	plastid	2	C	81.4929
Solyc02g093940.2.1	mTERF domain-containing protein 1, mitochondrial (AHRD V1 *--- MTER1_HUMAN); contains Interpro domain(s) IPR003690 Mitochodrial transcription termination factor-related	M	2	Y	M	plastid	14	G	41.9484
Solyc02g093990.2.1	Adenylate kinase family-like protein (AHRD V1 ***- Q38JG0_SOLTU); contains Interpro domain(s) IPR000850 Adenylate kinase	M	3	-	M	plastid	4	plastid	95.7992
Solyc02g094150.2.1	Sua5/YciO/YrdC/YwlC family protein (AHRD V1 ***- C9KUX7_9BACE); contains Interpro domain(s) IPR004388 Sua5/YciO/YrdC/YwlC	plastid	3	Y	none	plastid	3	C	84.8436
Solyc02g094210.1.1	Os02g0508100 protein (Fragment) (AHRD V1 ***- Q0E0Z9_ORYSJ)	S	1	Y	ER	not plastid	0	EX	97.1586
Solyc02g094260.1.1	Protein SMG9 (AHRD V1 ***- SMG9_RAT)	plastid	3	Y	none	plastid	10	plastid	92.3585
Solyc02g094360.2.1	Regulation of nuclear pre-mRNA domain containing 1B (AHRD V1 *-*- B5DEK0_RAT); contains Interpro domain(s) IPR006903 Protein of unknown function DUF618	-	4	-	possibly plastid	not plastid	0	N	86.1077
Solyc02g094380.1.1	Serine/threonine-protein kinase (AHRD V1 **** C6ZRV0_SOYBN); contains Interpro domain(s) IPR002290 Serine/threonine protein kinase	-	5	-	none	not plastid	0	plastid	66.0058
Solyc02g094420.2.1	Shikimate kinase (AHRD V1 ***- B9N0W2_POPTR); contains Interpro domain(s) IPR000623 Shikimate kinase	M	5	-	none	plastid	14	plastid	99.9751
Solyc02g094430.2.1	Hydrolase alpha/beta fold family protein (AHRD V1 **-- D7L9I6_ARALY); contains Interpro domain(s) IPR000073 Alpha/beta hydrolase fold-1	plastid	3	Y	plastid	plastid	20	plastid	95.4253
Solyc02g094460.1.1	AP2 domain-containing transcription factor (AHRD V1 *--* B9HIZ2_POPTR); contains Interpro domain(s) IPR003340 Transcriptional factor B3	plastid	2	Y	none	not plastid	0	N	99.9982
Solyc02g094470.2.1	Mitochondrial phosphate carrier protein (AHRD V1 **** B9GFH9_POPTR); contains Interpro domain(s) IPR001993 Mitochondrial substrate carrier	plastid	5	Y	none	plastid	9	M	57.8566
Solyc02g094510.2.1	Ring finger protein 10 (AHRD V1 *-*- Q6P1V6_XENTR)	plastid	1	Y	none	not plastid	0	N	98.643
Solyc02g094520.2.1	Histone-lysine N-methyltransferase (AHRD V1 *-*- B6K768_SCHJY); contains Interpro domain(s) IPR003105 SRA-YDG	plastid	5	-	none	plastid	3	N	99.9855
Solyc02g094590.2.1	Transcription-repair coupling factor (AHRD V1 ***- B4WRL4_9SYNE); contains Interpro domain(s) IPR011545 DNA/RNA helicase, DEAD/DEAH box type, N-terminal	plastid	1	Y	plastid	plastid	12	N	99.7613
Solyc02g094720.1.1	Unknown Protein (AHRD V1)	plastid	5	-	none	plastid	1	N	81.1212
Solyc02g094750.1.1	Targeting protein for Xklp2 containing protein expressed (AHRD V1 *-*- Q10Q22_ORYSJ)	plastid	2	Y	none	plastid	2	N	99.7216
Solyc03g005000.2.1	Peptidase M48 Ste24p (AHRD V1 ***- B6TA12_MAIZE); contains Interpro domain(s) IPR001915 Peptidase M48, Ste24p	plastid	3	Y	plastid	plastid	13	G	45.9364
Solyc03g005010.2.1	Uncharacterized RNA methyltransferase (AHRD V1 ***- C3BFC5_9BACI)	plastid	2	Y	plastid	plastid	1	G	54.9655
Solyc03g005030.2.1	Unknown Protein (AHRD V1)	M	5	Y	possibly plastid	not plastid	0	N	99.826
Solyc03g005130.1.1	Receptor-like protein kinase (AHRD V1 ***- B6ST43_MAIZE); contains Interpro domain(s) IPR002290 Serine/threonine protein kinase	S	4	Y	ER	plastid	8	PM	99.9958
Solyc03g005190.2.1	Ferredoxin (AHRD V1 *-*- Q8LD29_ARATH); contains Interpro domain(s) IPR010241 Ferredoxin [2Fe-2S], plant	S	5	-	none	plastid	6	plastid	92.0798
Solyc03g005200.2.1	Non-specific lipid-transfer protein (AHRD V1 ***- C6T196_SOYBN); contains Interpro domain(s) IPR013770 Plant lipid transfer protein and hydrophobic protein, helical	S	4	Y	ER	plastid	2	V	52.5571
Solyc03g005220.2.1	Histone H2A (AHRD V1 ***- B9MZP0_POPTR); contains Interpro domain(s) IPR002119 Histone H2A	plastid	3	Y	none	plastid	4	M	78.2063
Solyc03g005230.2.1	Menaquinone biosynthesis methyltransferase ubiE (AHRD V1 *-** A1BDQ8_CHLPD); contains Interpro domain(s) IPR013216 Methyltransferase type 11	plastid	1	Y	plastid	plastid	8	plastid	99.9942
Solyc03g005260.2.1	Sulfate adenylyltransferase (AHRD V1 **** Q43183_SOLTU); contains Interpro domain(s) IPR002650 ATP-sulfurylase	plastid	2	Y	plastid	plastid	12	plastid	99.9612
Solyc03g005290.1.1	Unknown Protein (AHRD V1)	plastid	3	Y	none	plastid	8	plastid	80.4002
Solyc03g005310.2.1	Genomic DNA chromosome 3 P1 clone MXC7 (AHRD V1 ***- Q9LS90_ARATH); contains Interpro domain(s) IPR011989 Armadillo-like helical	plastid	5	Y	none	plastid	14	plastid	73.8066
Solyc03g005330.1.1	CBL-interacting protein kinase 20 (AHRD V1 **** C4P7W9_VITVI); contains Interpro domain(s) IPR002290 Serine/threonine protein kinase	plastid	4	-	none	plastid	4	C	95.6621
Solyc03g005340.2.1	Prolyl endopeptidase (AHRD V1 *-** C0NUP9_AJECG); contains Interpro domain(s) IPR001375 Peptidase S9, prolyl oligopeptidase active site region	plastid	2	Y	plastid	plastid	11	plastid	94.1231
Solyc03g005450.2.1	Cellulose synthase (AHRD V1 **** B2LWL9_9ROSI); contains Interpro domain(s) IPR005150 Cellulose synthase	-	3	-	possibly plastid	not plastid	0	PM	99.9624
Solyc03g005510.1.1	Ethylene-responsive transcription factor 1A (AHRD V1 *-** A9P6A4_MEDTR); contains Interpro domain(s) IPR001471 Pathogenesis-related transcriptional factor and ERF, DNA-binding	plastid	3	-	none	plastid	6	N	99.9866
Solyc03g005590.1.1	Regulator of chromosome condensation domain-containing protein (AHRD V1 *--- Q55CR5_DICDI); contains Interpro domain(s) IPR009091 Regulator of chromosome condensation/beta-lactamase-inhibitor protein II	-	5	Y	possibly plastid	plastid	4	C	98.4242
Solyc03g005620.2.1	Kinesin like protein (AHRD V1 ***- O23291_ARATH); contains Interpro domain(s) IPR001752 Kinesin, motor region	plastid	4	Y	none	plastid	12	C	99.9972
Solyc03g005700.1.1	Mitochondrial import receptor subunit TOM22 (AHRD V1 ***- B6U2X6_MAIZE)	-	5	Y	none	plastid	10	C	80.6196
Solyc03g005730.2.1	3-isopropylmalate dehydratase large subunit 2 (AHRD V1 ***- B6U6T6_MAIZE); contains Interpro domain(s) IPR011826 Homoaconitase/3-isopropylmalate dehydratase, large subunit, prokaryotic	plastid	1	Y	plastid	plastid	12	plastid	83.3512
Solyc03g005760.1.1	Chlorophyll a-b binding protein 3C-like (AHRD V1 **** Q2XTE0_SOLTU); contains Interpro domain(s) IPR001344 Chlorophyll A-B binding protein	plastid	2	Y	plastid	plastid	14	plastid	100
Solyc03g005770.1.1	Chlorophyll a-b binding protein 3C-like (AHRD V1 **** Q2XTE0_SOLTU); contains Interpro domain(s) IPR001344 Chlorophyll A-B binding protein	plastid	2	Y	plastid	plastid	14	plastid	100
Solyc03g005780.1.1	Chlorophyll a-b binding protein 3C-like (AHRD V1 **** Q2XTE0_SOLTU); contains Interpro domain(s) IPR001344 Chlorophyll A-B binding protein	plastid	2	Y	plastid	plastid	14	plastid	100
Solyc03g005840.1.1	Outward rectifying potassium channel (AHRD V1 **** B9I109_POPTR); contains Interpro domain(s) IPR013099 Ion transport 2	plastid	4	Y	none	not plastid	0	P	70.6003
Solyc03g006050.2.1	Leucine rich repeat family protein (AHRD V1 *--- Q1EP22_MUSBA)	plastid	3	Y	ER	plastid	12	V	68.5587
Solyc03g006100.2.1	Receptor like kinase, RLK	plastid	5	-	none	plastid	5	PM	99.8372
Solyc03g006280.2.1	Unknown Protein (AHRD V1)	plastid	1	Y	plastid	plastid	12	C	53.7157
Solyc03g006310.2.1	Unknown Protein (AHRD V1)	plastid	4	Y	M	plastid	7	M	98.6717
Solyc03g006320.1.1	Ethylene-responsive transcription factor 4 (AHRD V1 *-*- B6THY5_MAIZE); contains Interpro domain(s) IPR001471 Pathogenesis-related transcriptional factor and ERF, DNA-binding	-	4	-	possibly plastid	plastid	11	N	91.7704
Solyc03g006400.2.1	Protein kinase (AHRD V1 ***- Q39886_SOYBN); contains Interpro domain(s) IPR001245 Tyrosine protein kinase	M	5	Y	none	not plastid	0	C	98.3373
Solyc03g006420.2.1	Origin recognition complex subunit 1 (AHRD V1 **-- Q945C8_MAIZE); contains Interpro domain(s) IPR001025 Bromo adjacent region	plastid	3	Y	none	plastid	1	N	99.9986
Solyc03g006430.2.1	Os11g0198100 protein (Fragment) (AHRD V1 *-*- Q0IU20_ORYSJ); contains Interpro domain(s) IPR006852 Protein of unknown function DUF616	M	5	Y	none	plastid	7	plastid	96.408
Solyc03g006500.2.1	Receptor-like protein kinase At3g21340 (AHRD V1 **** RLK6_ARATH); contains Interpro domain(s) IPR002290 Serine/threonine protein kinase	-	4	-	none	plastid	4	plastid	48.0873
Solyc03g006520.2.1	Splicing factor 3b subunit 2 (AHRD V1 **-- Q80W39_MOUSE); contains Interpro domain(s) IPR007180 Protein of unknown function DUF382	-	5	Y	none	not plastid	0	N	99.9947
Solyc03g006530.2.1	Phosphoinositide-binding clathrin adaptor N-terminal Wiscott-Aldrich syndrome C-terminal (AHRD V1 *--- A2Q4Q2_MEDTR)	-	4	-	plastid	plastid	4	N	69.6001
Solyc03g006540.2.1	Unknown Protein (AHRD V1)	plastid	3	Y	plastid	plastid	11	C	91.655
Solyc03g006590.2.1	Unknown Protein (AHRD V1)	-	1	Y	none	plastid	5	PM	77.9081
Solyc03g006600.1.1	Unknown Protein (AHRD V1)	plastid	4	-	none	not plastid	0	N	93.6485
Solyc03g006640.2.1	F-box family protein (AHRD V1 ***- B9H220_POPTR); contains Interpro domain(s) IPR001810 Cyclin-like F-box	-	5	Y	none	plastid	3	C	69.5269
Solyc03g006680.2.1	Universal stress protein (AHRD V1 **-- D6BRD7_9ROSI); contains Interpro domain(s) IPR006016 UspA	plastid	3	Y	none	not plastid	0	N	66.4998
Solyc03g006730.1.1	Serine/threonine-protein kinase receptor (AHRD V1 *-** B6U2B7_MAIZE); contains Interpro domain(s) IPR002290 Serine/threonine protein kinase	S	5	Y	ER	not plastid	0	PM	94.9412
Solyc03g006870.2.1	Phosphoglucomutase (AHRD V1 **** C1MKX8_MIplastidS); contains Interpro domain(s) IPR016055 Alpha-D-phosphohexomutase, alpha/beta/alpha I, II and III	plastid	1	Y	plastid	plastid	13	plastid	85.1172
Solyc03g007000.2.1	Peptidase M48 Ste24p (AHRD V1 *-*- D1N2Y3_9BACT); contains Interpro domain(s) IPR001915 Peptidase M48, Ste24p	M	4	Y	possibly M	plastid	4	M	98.7034
Solyc03g007030.2.1	CDGSH iron sulfur domain-containing protein 1 (AHRD V1 ***- B5X1R9_SALSA); contains Interpro domain(s) IPR006622 Iron sulphur domain-containing, CDGSH-type, subfamily	plastid	3	Y	possibly plastid	plastid	12	M	81.3506
Solyc03g007090.1.1	At5g51670-like protein (Fragment) (AHRD V1 *-*- C0JEX1_9BRAS); contains Interpro domain(s) IPR007700 Protein of unknown function DUF668	-	5	Y	none	plastid	6	P	47.5274
Solyc03g007110.2.1	ATP-dependent Clp protease ATP-binding subunit ClpC (AHRD V1 *-*- D6KVC7_SCAIO); contains Interpro domain(s) IPR004176 Clp, N-terminal	plastid	2	Y	plastid	plastid	13	plastid	99.3938
Solyc03g007330.2.1	Cell division protease ftsH homolog (AHRD V1 *-*- FTSH_RICTY); contains Interpro domain(s) IPR005936 Peptidase M41, FtsH	plastid	2	Y	none	plastid	11	ER	80.036
Solyc03g007370.2.1	RNA polymerase sigma factor (AHRD V1 *-** C7QR23_CYAP0); contains Interpro domain(s) IPR013325 RNA polymerase sigma factor, region 2	plastid	3	Y	plastid	plastid	10	N	96.725
Solyc03g007390.2.1	Pentatricopeptide repeat-containing protein (AHRD V1 ***- D7ML46_ARALY); contains Interpro domain(s) IPR002885 Pentatricopeptide repeat	plastid	4	Y	possibly ER	plastid	11	C	99.3451
Solyc03g007490.2.1	Kinesin like protein (AHRD V1 ***- O23274_ARATH)	plastid	2	Y	none	plastid	8	N	57.9326
Solyc03g007510.2.1	HAT dimerisation domain-containing protein-like (AHRD V1 ***- Q5NB62_ORYSJ); contains Interpro domain(s) IPR007021 Protein of unknown function DUF659	plastid	3	Y	plastid	plastid	8	C	50.1093
Solyc03g007540.2.1	Unknown Protein (AHRD V1)	plastid	1	Y	possibly plastid	plastid	20	plastid	95.0798
Solyc03g007550.2.1	Unknown Protein (AHRD V1)	S	5	-	plastid	plastid	7	G	84.9073
Solyc03g007620.2.1	Os01g0225300 protein (Fragment) (AHRD V1 *-*- Q0JPF5_ORYSJ)	-	5	Y	none	plastid	4	C	41.7785
Solyc03g007690.1.1	ABC transporter G family member 8 (AHRD V1 ***- AB8G_ARATH); contains Interpro domain(s) IPR013525 ABC-2 type transporter	-	4	Y	none	not plastid	0	plastid	70.9601
Solyc03g007810.2.1	Pyruvate kinase (AHRD V1 ***- A5BTB0_VITVI); contains Interpro domain(s) IPR001697 Pyruvate kinase	plastid	1	Y	plastid	plastid	14	plastid	95.7825
Solyc03g007830.2.1	Threonine endopeptidase (AHRD V1 *--- B6TCN7_MAIZE)	plastid	1	Y	plastid	plastid	7	plastid	74.4377
Solyc03g007840.1.1	Pentatricopeptide repeat-containing protein (AHRD V1 ***- D7MBT1_ARALY); contains Interpro domain(s) IPR002885 Pentatricopeptide repeat	M	2	-	possibly M	plastid	8	plastid	72.561
Solyc03g007860.1.1	ABC-type Co2+ transport system permease component (AHRD V1 *--- B6U434_MAIZE)	plastid	4	-	plastid	plastid	11	PM	89.4472
Solyc03g007900.2.1	Glutamine cyclotransferase-like (AHRD V1 **** Q2V9A5_SOLTU); contains Interpro domain(s) IPR007788 Glutamine cyclotransferase	plastid	4	Y	none	plastid	2	G	92.8846
Solyc03g007960.2.1	Beta-carotene hydroxylase 2	plastid	2	Y	plastid	plastid	5	M	70.3255
Solyc03g007970.1.1	UDP-N-acetylmuramate-alanine ligase (AHRD V1 ***- Q3LHF7_PHYPA); contains Interpro domain(s) IPR005758 UDP-N-acetylmuramate-alanine ligase	plastid	4	-	possibly plastid	not plastid	0	C	57.0293
Solyc03g007980.1.1	Septum site-determining protein MinD (AHRD V1 ***- D8FVX6_9CYAN); contains Interpro domain(s) IPR010223 Septum site-determining protein MinD	plastid	1	Y	none	plastid	13	plastid	99.9842
Solyc03g013120.1.1	Unknown Protein (AHRD V1)	plastid	3	Y	possibly plastid	plastid	8	N	96.7254
Solyc03g013150.1.1	Unknown Protein (AHRD V1)	-	3	Y	none	plastid	9	C	80.319
Solyc03g013230.1.1	Unknown Protein (AHRD V1)	-	5	Y	none	plastid	13	plastid	79.5788
Solyc03g013240.2.1	Homology to unknown gene (AHRD V1 ***- Q01H71_OSTTA)	plastid	3	Y	possibly plastid	plastid	13	C	80.1395
Solyc03g013420.1.1	Unknown Protein (AHRD V1)	plastid	4	Y	plastid	plastid	3	V	66.8883
Solyc03g013430.1.1	Unknown Protein (AHRD V1)	M	5	Y	none	plastid	9	PM	88.771
Solyc03g013490.1.1	Ycf2 (AHRD V1 ***- A6YA48_9MAGN)	plastid	4	-	none	not plastid	0	C	99.9864
Solyc03g019660.2.1	Thylakoid lumenal 17.9 kDa protein, chloroplastic (AHRD V1 ***- TL1Y_ARATH)	plastid	5	Y	plastid	plastid	14	plastid	99.6386
Solyc03g019680.2.1	CBS domain containing protein (AHRD V1 ***- B6U1W0_MAIZE); contains Interpro domain(s) IPR000644 Cystathionine beta-synthase, core	plastid	2	Y	none	plastid	6	plastid	87.5906
Solyc03g019790.2.1	Alpha-galactosidase (AHRD V1 **** Q9SP05_SOLLC); contains Interpro domain(s) IPR013785 Aldolase-type TIM barrel	S	2	Y	ER	plastid	10	G	83.5334
Solyc03g019810.2.1	Metallophosphoesterase (AHRD V1 **-- C5AIN9_BURGB)	M	3	-	possibly plastid	plastid	9	M	45.3748
[truncated: 5,475 more rows]

## Sheet: Table S3A legend
Table S3A Legend. The tomato chloroplast protein Atlas includes 7,473 tomato nuclear-genome and plastid=genome encoded proteins: Localization predictions by TargetP, ChloroP, Predotar, Wolf PSORT, and YLoc.
A Tomato genes were identified with Sol Genomics ID number (Solyc#) or NCBI gene identifier (GI#).
B Target P's subcellular locations are: chloroplast (plastid), mitochondria (M), secretory (S), and no predicted location is indicated by a dash (-).
C ChloroP was used to predict the presence of a chloroplast transit peptide (Y) and the lack of a predicted transit peptide is indicated with a dash (-).
D Predotar's predicted subcellular locations were: chloroplast/plastid (plastid),endoplasmic reticulum (ER) or mitochondrion (M). For proteins with localization predictions that were less clear, Predotar provided categories of possibly plastid, possibly M and possibly ER. Proteins with unresolved locations or that did not have a homolog detected by Predotar are indicated with a dash (-).
E WoLF PSORT's and YLoc's predicted subcellular locations were: chloroplast/plastid (plastid), cytosol (C), cytoskeleton (Cy), endoplasmic reticulum (ER), extracellular (EX), golgi apparatus (G), mitochondrion (M), nucleus (N), peroxisomes (P), plasma membrance (PM), and vacuole (V). Proteins with no chloroplast location in WoLF PSORT are indicated by "not plastid". Proteins with unresolved locat…
F WoLF PSORT provides the number of proteins in their database with localization features similar to the tomato query as a measure of confidence.

## Sheet: Table S3B
Table S3B. The tomato homologs of the 11443 Arabidopsis proteins with evidence for chloroplast localization by one or more Arabidopsis databases.A
Sol Genomics ID A, I	Descriptor	Atlas concensus B	TargetP C	TargetP Reliability Class	ChloroP (transit peptide predicted) D	Predotar E	WoLF PSORT F	WoLF PSORT chloroplast prediction number of proteins F	Yloc F	YLoc % confidence F	Arabidopsis ortholog subcellular localizations
											Arabidopsis gene G	PPDB	SUBA4	plprot
Solyc12g100340.1.1*	Acetyl-coenzyme A synthetase (AHRD V1 *-*- D9PVL2_METTM); contains Interpro domain(s) IPR000504 RNA recognition motif, RNP-1	-	-	-	-	-	-	-	-	-	AT1G55320*	-	P, plastid	-
Solyc12g100340.1.1*	Acetyl-coenzyme A synthetase (AHRD V1 *-*- D9PVL2_METTM); contains Interpro domain(s) IPR000504 RNA recognition motif, RNP-1	-	-	-	-	-	-	-	-	-	AT5G23050*	-	P, plastid	-
Solyc02g090890.2.1	Zeaxanthin epoxidase, chloroplastic	Atlas	Cp	5	-	Cp	Cp	3	M	68.3	AT5G67030	thylakoid-peripheral-stromal-side; stroma	plastid	plastid
Solyc12g100320.1.1	Unknown Protein (AHRD V1)	-	-	-	-	-	-	-	-	-	AT3G63390	-	Cp	-
Solyc11g008990.1.1	Phage shock protein A PspA (AHRD V ***- B7K4B0_CYAP8); contains Interpro domain(s) IPR00757 PspA/IM30	Atlas	Cp	2	Y	Cp	Cp	13	Cp	55.3	AT1G65260	thylakoid-peripheral-stromal-side; plastid stroma; envelope-intermembranespace	plastid	plastid
Solyc12g013810.1.1*	Thioredoxin (AHRD V ***- A7LNX7_9CARY); contains Interpro domain(s) IPR005746 Thioredoxin	Atlas	Cp	1	Y	Cp	Cp	12	Cp	99.9	AT3G15360*	thylakoid-peripheral-stromal-side; plastid stroma	plastid	plastid
Solyc12g007310.1.1*	Lactoylglutathione lyase (AHRD V **** B6SSK_MAIZE); contains Interpro domain(s) IPR00436 Glyoxalase I	Atlas	Cp	3	Y	M	Cp	13	C	55.3	AT1G67280*	thylakoid-peripheral-stromal-side; plastid stroma	plastid	plastid
Solyc11g069380.1.1	4-hydroxy-3-methylbut-2-en--yl diphosphate synthase (AHRD V ***- A9ZN4_HEVBR); contains Interpro domain(s) IPR0778 4-hydroxy-3-methylbut-2-en--yl diphosphate synthase, atypical	Atlas	Cp	3	Y	possibly Cp	Cp	14	Cp	98.2	AT5G60600	thylakoid-peripheral-stromal-side; plastid stroma	plastid	plastid
Solyc11g066390.1.1	Superoxide dismutase (AHRD V ***- Q7XAV2_SOLLC); contains Interpro domain(s) IPR0852 Superoxide dismutase, copper/zinc, binding site	Atlas	Cp	1	Y	Cp	Cp	11	Cp	99.9	AT2G28190	thylakoid-peripheral-stromal-side; plastid stroma	plastid	plastid
Solyc10g082030.1.1*	Peroxiredoxin (AHRD V **-- Q9FE2_PHAVU); contains Interpro domain(s) IPR000866 Alkyl hydroperoxide reductase/ Thiol specific antioxidant/ Mal allergen	Atlas	Cp	1	Y	Cp	Cp	13	Cp	100	AT3G11630*	thylakoid-peripheral-stromal-side; plastid stroma	plastid	plastid
Solyc10g047950.1.1	Inorganic pyrophosphatase family protein (AHRD V **** D7M262_ARALY); contains Interpro domain(s) IPR00862 Inorganic pyrophosphatase	Atlas	Cp	2	Y	Cp	Cp	14	Cp	95.7	AT5G09650*	thylakoid-peripheral-stromal-side; plastid stroma	plastid	plastid
Solyc12g100130.1.1	Vesicular glutamate transporter (AHRD V1 **-- A8J6T9_CIOIN); contains Interpro domain(s) IPR016196 Major facilitator superfamily, general substrate transporter	-	-	-	-	-	-	-	-	-	AT4G00370*	envelope-inner-integral	Cp	-
Solyc10g008390.2.1*	Thioredoxin (AHRD V ***- A7LNX7_9CARY); contains Interpro domain(s) IPR005746 Thioredoxin	Atlas	Cp	1	Y	Cp	Cp	11	Cp	91.8	AT4G03520	thylakoid-peripheral-stromal-side; plastid stroma	plastid	plastid
Solyc10g006970.2.1*	Thioredoxin m (AHRD V ***- B9HZV8_POPTR); contains Interpro domain(s) IPR005746 Thioredoxin	Atlas	Cp	1	Y	Cp	Cp	12	Cp	98.9	AT3G15360*	thylakoid-peripheral-stromal-side; plastid stroma	plastid	plastid
Solyc10g006290.2.1	Endoribonuclease L-PSP family protein (AHRD V **-* D7LAZ0_ARALY); contains Interpro domain(s) IPR09897 YjgF-like protein, conserved site	Atlas	M	5	Y	Cp	Cp	12	M	56.3	AT3G20390*	thylakoid-peripheral-stromal-side; plastid stroma	plastid	plastid
Solyc08g066850.2.1*	Lactoylglutathione lyase (AHRD V ***- B6SSK_MAIZE); contains Interpro domain(s) IPR00436 Glyoxalase I	Atlas	Cp	2	Y	possibly Cp	Cp	19	C	94.3	AT1G67280*	thylakoid-peripheral-stromal-side; plastid stroma	plastid	plastid
Solyc12g099970.1.1	5-amp-activated protein kinase beta subunit (AHRD V1 **** Q17IU7_AEDAE); contains Interpro domain(s) IPR006828 5-AMP-activated protein kinase, beta subunit, complex-interacting region	-	-	-	-	-	-	-	-	-	AT4G16360*	-	Cp	-
Solyc12g099960.1.1	Unknown Protein (AHRD V1)	-	-	-	-	-	-	-	-	-	AT1G16790	plastid	plastid	plastid
Solyc12g099940.1.1	Gcn5-related n-acetyltransferase family protein (AHRD V1 *-*- C1FD65_9CHLO); contains Interpro domain(s) IPR000182 GCN5-related N-acetyltransferase	-	-	-	-	-	-	-	-	-	AT4G28030*	plastid stroma	plastid	-
Solyc12g099930.1.1	Serine-glyoxylate aminotransferase (AHRD V1 ***- Q3S2I1_SPIPO); contains Interpro domain(s) IPR000192 Aminotransferase, class V/Cysteine desulfurase	-	-	-	-	-	-	-	-	-	AT2G13360	-	P, plastid	plastid
Solyc07g064600.2.1	Endoribonuclease L-PSP family protein (AHRD V **-* D7LAZ0_ARALY); contains Interpro domain(s) IPR09897 YjgF-like protein, conserved site	Atlas	Cp	2	Y	Cp	Cp	14	Cp	94.8	AT3G20390*	thylakoid-peripheral-stromal-side; plastid stroma	plastid	plastid
Solyc07g063190.2.1*	Thioredoxin (AHRD V ***- A7LNX7_9CARY); contains Interpro domain(s) IPR005746 Thioredoxin	Atlas	Cp	1	Y	Cp	Cp	14	Cp	99.8	AT3G15360*	thylakoid-peripheral-stromal-side; plastid stroma	plastid	plastid
Solyc06g068670.2.1	Unknown Protein (AHRD V)	Atlas	Cp	3	Y	Cp	Cp	11	EX	30.3	AT1G16880*	thylakoid-peripheral-stromal-side; plastid stroma	plastid	plastid
Solyc12g099860.1.1	GTP-binding family protein (AHRD V1 ***- D7LHA2_ARALY); contains Interpro domain(s) IPR002917 GTP-binding protein, HSR1-related	-	-	-	-	-	-	-	-	-	AT2G41670*	-	M, plastid	-
Solyc12g099850.1.1	Pentatricopeptide repeat-containing protein (AHRD V1 ***- D7KGE6_ARALY); contains Interpro domain(s) IPR002885 Pentatricopeptide repeat	-	-	-	-	-	-	-	-	-	AT3G57430*	plastid	plastid	-
Solyc05g056300.2.1*	Thioredoxin-like protein (AHRD V *-*- D8UJJ9_VOLCA); contains Interpro domain(s) IPR05467 Thioredoxin, core	Atlas	Cp	2	Y	Cp	Cp	14	Cp	74.8	AT3G02730	thylakoid-peripheral-stromal-side; plastid stroma	plastid	plastid
Solyc03g117890.2.1	Unknown protein DS2 from 2D-PAGE of leaf, chloroplastic (AHRD V **-- UP2_ORYSJ)	Atlas	Cp	2	Y	Cp	Cp	9	Cp	99.7	AT1G16880*	thylakoid-peripheral-stromal-side; plastid stroma	plastid	plastid
Solyc01g108020.2.1*	Thioredoxin m (AHRD V ***- B9HS7_POPTR); contains Interpro domain(s) IPR05467 Thioredoxin, core	Atlas	Cp	2	-	Cp	Cp	13	Cp	99.8	AT3G15360*	thylakoid-peripheral-stromal-side; plastid stroma	plastid	plastid
Solyc12g099770.1.1	Mitochondria fission 1 protein (AHRD V1 ***- B6T224_MAIZE); contains Interpro domain(s) IPR016543 Tetratricopeptide repeat 11 Fission 1 protein	-	-	-	-	-	-	-	-	-	AT3G57090*	plastid; P; M	M,P,plastid	-
Solyc12g099760.1.1	Homeobox protein (AHRD V1 *-*- D6BV21_ORYSJ); contains Interpro domain(s) IPR001356 Homeobox	-	-	-	-	-	-	-	-	-	AT1G28420*	-	N, plastid	-
Solyc12g099700.1.1	Lipoyl synthase (AHRD V1 *-*- B4UC29_ANASK); contains Interpro domain(s) IPR003698 Lipoate synthase	-	-	-	-	-	-	-	-	-	AT5G08415*	plastid	-	-
Solyc01g106430.2.1	Inorganic pyrophosphatase family protein (AHRD V **** D7M262_ARALY); contains Interpro domain(s) IPR00862 Inorganic pyrophosphatase	Atlas	Cp	3	Y	Cp	Cp	14	M	59.8	AT5G09650*	thylakoid-peripheral-stromal-side; plastid stroma	plastid	plastid
Solyc01g097460.2.1	Ribose-5-phosphate isomerase (AHRD V ***- A8IRQ_CHLRE); contains Interpro domain(s) IPR004788 Ribose 5-phosphate isomerase	Atlas	Cp	3	Y	Cp	Cp	17	Cp	93.4	AT3G04790	thylakoid-peripheral-stromal-side; plastid stroma	plastid	plastid
Solyc01g080840.2.1*	Protein translocase subunit secA (AHRD V ***- B9I9A8_POPTR); contains Interpro domain(s) IPR00085 SecA protein	Atlas	Cp	2	Y	-	Cp	1	N	77.4	AT4G01800	thylakoid-peripheral-stromal-side; plastid stroma	plastid	plastid
Solyc01g009080.2.1	FHA domain containing protein (AHRD V ***- B6TP39_MAIZE); contains Interpro domain(s) IPR000253 Forkhead-associated	Atlas	Cp	3	Y	-	Cp	11	Cp	99.8	AT2G21530	thylakoid-peripheral-stromal-side; plastid stroma	plastid	plastid
Solyc01g007740.2.1*	Peroxiredoxin (AHRD V **-- Q9FE2_PHAVU); contains Interpro domain(s) IPR000866 Alkyl hydroperoxide reductase/ Thiol specific antioxidant/ Mal allergen	Atlas	Cp	1	Y	Cp	Cp	12	Cp	99.9	AT3G11630*	thylakoid-peripheral-stromal-side; plastid stroma	plastid	plastid
Solyc10g077040.1.1	Magnesium-protoporphyrin IX monomethyl ester (AHRD V **** B9SCF8_RICCO); contains Interpro domain(s) IPR008434 Magnesium-protoporphyrin IX monomethyl ester aerobic oxidative cyclase	Atlas	Cp	3	Y	Cp	Cp	11	Cp	89.9	AT3G56940	thylakoid-peripheral-stromal-side; envelope-inner-peripheral-stromal-side	plastid	plastid
Solyc07g054820.2.1	Protein thf (AHRD V ***- A0YRG_LYNSP)	Atlas	Cp	1	Y	Cp	Cp	12	Cp	97.7	AT2G20890	thylakoid-peripheral-stromal-side; envelope-inner-peripheral-stromal-side	plastid	plastid
Solyc12g099440.1.1	Fatty acid oxidation complex subunit alpha (AHRD V1 ***- FADJ_ECOHS); contains Interpro domain(s) IPR006176 3-hydroxyacyl-CoA dehydrogenase, NAD binding	-	-	-	-	-	-	-	-	-	AT4G29010*	-	P, plastid	plastid
Solyc12g056830.1.1	ATP synthase delta subunit (AHRD V ***- Q7XYM8_BIGNA); contains Interpro domain(s) IPR0007 ATPase, F complex, OSCP/delta subunit	Atlas	Cp	3	Y	Cp	Cp	14	Cp	99.4	AT4G09650*	thylakoid-peripheral-stromal-side	plastid	plastid
Solyc12g099290.1.1	Aldehyde dehydrogenase (AHRD V1 ***- A2Q2X1_MEDTR); contains Interpro domain(s) IPR015590 Aldehyde dehydrogenase	-	-	-	-	-	-	-	-	-	AT1G74920*	-	C, plastid	-
Solyc12g013810.1.1*	Thioredoxin (AHRD V ***- A7LNX7_9CARY); contains Interpro domain(s) IPR005746 Thioredoxin	Atlas	Cp	1	Y	Cp	Cp	12	Cp	99.9	AT1G03680*	thylakoid-peripheral-stromal-side	plastid	plastid
Solyc12g013710.1.1*	Protochlorophyllide reductase (AHRD V ***- Q8LAV9_ARATH); contains Interpro domain(s) IPR005979 Light-dependent protochlorophyllide reductase	Atlas	Cp	2	Y	Cp	Cp	9	Cp	100	AT4G27440*	thylakoid-peripheral-stromal-side	plastid	plastid
Solyc12g013710.1.1*	Protochlorophyllide reductase (AHRD V ***- Q8LAV9_ARATH); contains Interpro domain(s) IPR005979 Light-dependent protochlorophyllide reductase	Atlas	Cp	2	Y	Cp	Cp	9	Cp	100	AT5G54190*	thylakoid-peripheral-stromal-side	plastid	-
Solyc12g005060.1.1*	ATP synthase gamma chain (AHRD V ***- C6TES6_SOYBN); contains Interpro domain(s) IPR0003 ATPase, F complex, gamma subunit	Atlas	Cp	1	Y	Cp	Cp	17	Cp	70.3	AT4G04640*	thylakoid-peripheral-stromal-side	plastid	plastid
Solyc11g044530.1.1*	PAP fibrillin (AHRD V ***- A2Q498_MEDTR); contains Interpro domain(s) IPR006843 PAP fibrillin	Atlas	Cp	2	Y	Cp	Cp	3	Cp	99.9	AT3G26070	thylakoid-peripheral-stromal-side	plastid	plastid
Solyc11g044530.1.1*	PAP fibrillin (AHRD V ***- A2Q498_MEDTR); contains Interpro domain(s) IPR006843 PAP fibrillin	Atlas	Cp	2	Y	Cp	Cp	3	Cp	99.9	AT3G26080*	thylakoid-peripheral-stromal-side	plastid	plastid
Solyc11g005340.1.1	PAP fibrillin family protein (AHRD V **-- B5W0K3_SPIMA); contains Interpro domain(s) IPR006843 PAP fibrillin	Atlas	Cp	3	-	M	Cp	11	Cp	68.6	AT5G09820	thylakoid-peripheral-stromal-side	plastid	-
Solyc10g075160.1.1*	Ferredoxin I (AHRD V ***- Q93XJ9_SOLTU); contains Interpro domain(s) IPR0024 Ferredoxin [2Fe-2S], plant	Atlas	Cp	2	Y	Cp	Cp	11	Cp	100	AT1G10960*	thylakoid-peripheral-stromal-side	plastid	-
Solyc10g075160.1.1*	Ferredoxin I (AHRD V ***- Q93XJ9_SOLTU); contains Interpro domain(s) IPR0024 Ferredoxin [2Fe-2S], plant	Atlas	Cp	2	Y	Cp	Cp	11	Cp	100	AT1G60950	thylakoid-peripheral-stromal-side	plastid	-
Solyc10g044520.1.1	Ferredoxin I (AHRD V ***- Q93XJ9_SOLTU); contains Interpro domain(s) IPR0024 Ferredoxin [2Fe-2S], plant	Atlas	Cp	3	Y	Cp	Cp	13	Cp	100	AT1G10960*	thylakoid-peripheral-stromal-side	plastid	-
Solyc12g099020.1.1	Unknown Protein (AHRD V1)	-	-	-	-	-	-	-	-	-	AT2G45540*	-	G, plastid	-
Solyc12g099010.1.1	Beige/BEACH domain containing protein (AHRD V1 *--- A2EN39_TRIVA); contains Interpro domain(s) IPR000409 Beige/BEACH	-	-	-	-	-	-	-	-	-	AT2G45540*	-	G, plastid	-
Solyc12g099000.1.1	S-adenosylmethionine synthase (AHRD V1 ***- B8LFH4_IPOBA); contains Interpro domain(s) IPR002133 S-adenosylmethionine synthetase	-	-	-	-	-	-	-	-	-	AT4G01850*	-	N,C, plastid	-
Solyc10g018590.1.1	Os04g055700 protein (Fragment) (AHRD V ***- Q0JB74_ORYSJ); contains Interpro domain(s) IPR006843 PAP fibrillin	Atlas	Cp	2	Y	Cp	Cp	5	Cp	95.7	AT4G00030	thylakoid-peripheral-stromal-side	plastid	-
Solyc10g008390.2.1*	Thioredoxin (AHRD V ***- A7LNX7_9CARY); contains Interpro domain(s) IPR005746 Thioredoxin	Atlas	Cp	1	Y	Cp	Cp	11	Cp	91.8	AT1G03680*	thylakoid-peripheral-stromal-side	plastid	plastid
Solyc12g098940.1.1*	Ubiquitin (AHRD V1 ***- D3PHG3_9MAXI); contains Interpro domain(s) IPR019956 Ubiquitin subgroup	-	-	-	-	-	-	-	-	-	AT2G47110*	-	C, plastid	-
Solyc12g098940.1.1*	Ubiquitin (AHRD V1 ***- D3PHG3_9MAXI); contains Interpro domain(s) IPR019956 Ubiquitin subgroup	-	-	-	-	-	-	-	-	-	AT3G62250*	-	N, plastid	-
Solyc10g006970.2.1*	Thioredoxin m (AHRD V ***- B9HZV8_POPTR); contains Interpro domain(s) IPR005746 Thioredoxin	Atlas	Cp	1	Y	Cp	Cp	12	Cp	98.9	AT1G03680*	thylakoid-peripheral-stromal-side	plastid	plastid
Solyc10g006900.2.1*	Protochlorophyllide reductase (AHRD V ***- Q8LAV9_ARATH); contains Interpro domain(s) IPR005979 Light-dependent protochlorophyllide reductase	Atlas	Cp	1	Y	Cp	Cp	13	Cp	100	AT4G27440*	thylakoid-peripheral-stromal-side	plastid	plastid
Solyc12g098860.1.1	DNA helicase (AHRD V1 *--- Q5CEI4_CRYHO); contains Interpro domain(s) IPR001650 DNA/RNA helicase, C-terminal	-	-	-	-	-	-	-	-	-	AT1G48310*	-	N, plastid	-
Solyc10g006900.2.1*	Protochlorophyllide reductase (AHRD V ***- Q8LAV9_ARATH); contains Interpro domain(s) IPR005979 Light-dependent protochlorophyllide reductase	Atlas	Cp	1	Y	Cp	Cp	13	Cp	100	AT5G54190*	thylakoid-peripheral-stromal-side	plastid	-
Solyc09g090570.2.1	Proton gradient regulation 5 (AHRD V ***- B0F83_CUCSA)	Atlas	Cp	5	Y	-	Cp	8	Cp	62.9	AT2G05620	thylakoid-peripheral-stromal-side	plastid	plastid
Solyc12g098740.1.1	Epsin-1 (AHRD V1 *-*- C0HAA4_SALSA); contains Interpro domain(s) IPR001026 Epsin, N-terminal	-	-	-	-	-	-	-	-	-	AT2G43160*	-	PM, plastid	-
Solyc09g063130.2.1*	Photosystem I reaction center subunit IV A (AHRD V *-*- B6TH55_MAIZE); contains Interpro domain(s) IPR003375 Photosystem I reaction centre subunit IV/PsaE	Atlas	Cp	1	Y	Cp	Cp	14	Cp	100	AT2G20260*	thylakoid-peripheral-stromal-side	plastid	plastid
Solyc09g063130.2.1*	Photosystem I reaction center subunit IV A (AHRD V *-*- B6TH55_MAIZE); contains Interpro domain(s) IPR003375 Photosystem I reaction centre subunit IV/PsaE	Atlas	Cp	1	Y	Cp	Cp	14	Cp	100	AT4G28750*	thylakoid-peripheral-stromal-side	plastid	plastid
Solyc08g077050.2.1*	Ferredoxin family protein (AHRD V ***- D7KHL5_ARALY); contains Interpro domain(s) IPR0024 Ferredoxin [2Fe-2S], plant	Atlas	Cp	1	Y	possibly Cp	Cp	2	Cp	100	AT1G10960*	thylakoid-peripheral-stromal-side	plastid	-
Solyc08g006160.2.1	Plastid fibrillin 3 (Fragment) (AHRD V **-- A6XBK9_COFCA); contains Interpro domain(s) IPR006843 PAP fibrillin	Atlas	Cp	2	Y	Cp	Cp	14	Cp	98.8	AT5G19940	thylakoid-peripheral-stromal-side	plastid	plastid
Solyc07g064940.2.1	Thioredoxin family protein (AHRD V *-*- QEPD8_MUSAC); contains Interpro domain(s) IPR03766 Thioredoxin domain	Atlas	M	4	-	possibly M	Cp	12	Cp	94.2	AT4G37200	thylakoid-peripheral-stromal-side	plastid	plastid
Solyc07g063190.2.1*	Thioredoxin (AHRD V ***- A7LNX7_9CARY); contains Interpro domain(s) IPR005746 Thioredoxin	Atlas	Cp	1	Y	Cp	Cp	14	Cp	99.8	AT1G03680*	thylakoid-peripheral-stromal-side	plastid	plastid
Solyc07g054210.2.1*	Protochlorophyllide reductase like protein (AHRD V ***- Q0WVW0_ARATH); contains Interpro domain(s) IPR005979 Light-dependent protochlorophyllide reductase	Atlas	Cp	2	Y	Cp	Cp	8	Cp	100	AT1G03630	thylakoid-peripheral-stromal-side	plastid	plastid
Solyc07g054210.2.1*	Protochlorophyllide reductase like protein (AHRD V ***- Q0WVW0_ARATH); contains Interpro domain(s) IPR005979 Light-dependent protochlorophyllide reductase	Atlas	Cp	2	Y	Cp	Cp	8	Cp	100	AT4G27440*	thylakoid-peripheral-stromal-side	plastid	plastid
Solyc12g098500.1.1*	Adenosylhomocysteinase (AHRD V1 ***- A1KYB0_TOBAC); contains Interpro domain(s) IPR000043 S-adenosyl-L-homocysteine hydrolase	-	-	-	-	-	-	-	-	-	AT3G23810*	-	C, plastid	-
Solyc12g098500.1.1*	Adenosylhomocysteinase (AHRD V1 ***- A1KYB0_TOBAC); contains Interpro domain(s) IPR000043 S-adenosyl-L-homocysteine hydrolase	-	-	-	-	-	-	-	-	-	AT4G13940*	-	C, plastid	-
Solyc12g098490.1.1	Serine hydroxymethyltransferase (AHRD V1 **** D2D306_GOSHI); contains Interpro domain(s) IPR001085 Serine hydroxymethyltransferase	-	-	-	-	-	-	-	-	-	AT4G13930*	-	C, plastid	-
Solyc07g054210.2.1*	Protochlorophyllide reductase like protein (AHRD V ***- Q0WVW0_ARATH); contains Interpro domain(s) IPR005979 Light-dependent protochlorophyllide reductase	Atlas	Cp	2	Y	Cp	Cp	8	Cp	100	AT5G54190*	thylakoid-peripheral-stromal-side	plastid	-
Solyc06g083680.2.1*	Photosystem I reaction center subunit IV A (AHRD V ***- B6TH55_MAIZE); contains Interpro domain(s) IPR008990 Electron transport accessory protein	Atlas	Cp	3	Y	Cp	Cp	14	Cp	100	AT2G20260*	thylakoid-peripheral-stromal-side	plastid	plastid
Solyc06g083680.2.1*	Photosystem I reaction center subunit IV A (AHRD V ***- B6TH55_MAIZE); contains Interpro domain(s) IPR008990 Electron transport accessory protein	Atlas	Cp	3	Y	Cp	Cp	14	Cp	100	AT4G28750*	thylakoid-peripheral-stromal-side	plastid	plastid
Solyc06g076790.1.1	Unknown Protein (AHRD V)	Atlas	Cp	4	Y	possibly Cp	Cp	13	Cp	84	AT3G47070	thylakoid-peripheral-stromal-side	plastid	plastid
Solyc06g069030.2.1	PAP fibrillin domain containing protein expressed (AHRD V **-- D8L9T8_WHEAT)	Atlas	Cp	5	-	-	Cp	7	Cp	84.3	AT1G18060	thylakoid-peripheral-stromal-side	plastid	plastid
Solyc12g098180.1.1	Vesicle-associated membrane protein 7B (AHRD V1 ***- D7KE74_ARALY); contains Interpro domain(s) IPR001388 Synaptobrevin	-	-	-	-	-	-	-	-	-	AT1G04760*	-	PM, plastid	plastid
Solyc12g098160.1.1*	Always early protein 3 (AHRD V1 **-- D7L0S7_ARALY); contains Interpro domain(s) IPR010561 DIRP	-	-	-	-	-	-	-	-	-	AT3G05380*	-	N, plastid	-
Solyc12g098160.1.1*	Always early protein 3 (AHRD V1 **-- D7L0S7_ARALY); contains Interpro domain(s) IPR010561 DIRP	-	-	-	-	-	-	-	-	-	AT3G21430*	-	N, plastid	-
Solyc12g098150.1.1	Voltage-gated potassium channel beta subunit (AHRD V1 **-- B6T7A1_MAIZE); contains Interpro domain(s) IPR005399 Potassium channel, voltage-dependent, beta subunit, KCNAB-related	-	-	-	-	-	-	-	-	-	AT1G60690*	-	C, plastid	plastid
Solyc06g068480.2.1*	Homology to unknown gene (Fragment) (AHRD V ***- Q0G24_OSTTA); contains Interpro domain(s) IPR08962 Domain of unknown function DUF995	Atlas	Cp	2	Y	Cp	Cp	21	Cp	58.1	AT1G73060	thylakoid-peripheral-stromal-side	plastid	plastid
Solyc06g054260.1.1	Photosystem I reaction center subunit II (AHRD V ***- B4FAW3_MAIZE); contains Interpro domain(s) IPR003685 Photosystem I protein PsaD	Atlas	Cp	1	Y	Cp	Cp	14	Cp	100	AT1G03130	thylakoid-peripheral-stromal-side	plastid	plastid
Solyc12g097010.1.1	Lrr, resistance protein fragment	-	-	-	-	-	-	-	-	-	AT5G11250*	-	Cp	-
Solyc06g054260.1.1	Photosystem I reaction center subunit II (AHRD V ***- B4FAW3_MAIZE); contains Interpro domain(s) IPR003685 Photosystem I protein PsaD	Atlas	Cp	1	Y	Cp	Cp	14	Cp	100	AT4G02770	thylakoid-peripheral-stromal-side	plastid	plastid
Solyc05g050500.1.1	ATP synthase F delta subunit (AHRD V ***- B4B4T7_9CHRO); contains Interpro domain(s) IPR0007 ATPase, F complex, OSCP/delta subunit	Atlas	Cp	4	Y	possibly Cp	Cp	3	Cp	99.9	AT4G09650*	thylakoid-peripheral-stromal-side	plastid	plastid
Solyc03g123880.2.1	Pyridoxamine 5&apos-phosphate oxidase-related FMN-binding (AHRD V **-- Q0TW9_SOLUE); contains Interpro domain(s) IPR009002 FMN-binding split barrel, related	Atlas	Cp	3	Y	Cp	Cp	13	Cp	44.7	AT3G21200	thylakoid-peripheral-stromal-side	plastid	-
Solyc03g082960.2.1	Serine/threonine phosphatase family protein (AHRD V **** CE0J_9CHLO); contains Interpro domain(s) IPR05655 Protein phosphatase 2C	Atlas	Cp	5	-	possibly Cp	not Cp	0	M	99.9	AT4G27800	thylakoid-peripheral-stromal-side	plastid	-
Solyc02g086890.2.1	Calcium homeostasis regulator chor (Fragment) (AHRD V *-*- A6NL7_ORYSI)	Atlas	Cp	2	Y	Cp	Cp	9	Cp	96.2	AT3G55250	thylakoid-peripheral-stromal-side	plastid	-
Solyc02g085730.2.1*	Allene oxide cyclase (AHRD V **** Q9LEG5_SOLLC); contains Interpro domain(s) IPR00940 Allene oxide cyclase	Atlas	Cp	1	Y	Cp	Cp	10	Cp	99.2	AT3G25770	thylakoid-peripheral-stromal-side	plastid	plastid
Solyc02g083810.2.1*	Ferredoxin--NADP reductase (AHRD V ***- D7MN04_ARALY); contains Interpro domain(s) IPR0246 Ferredoxin--NADP reductase	Atlas	Cp	1	Y	Cp	Cp	21	Cp	100	AT1G20020*	thylakoid-peripheral-stromal-side	plastid	plastid
Solyc02g083810.2.1*	Ferredoxin--NADP reductase (AHRD V ***- D7MN04_ARALY); contains Interpro domain(s) IPR0246 Ferredoxin--NADP reductase	Atlas	Cp	1	Y	Cp	Cp	21	Cp	100	AT5G66190*	thylakoid-peripheral-stromal-side	plastid	plastid
Solyc02g080540.1.1*	ATP synthase gamma chain (AHRD V ***- B7FIR4_MEDTR); contains Interpro domain(s) IPR0003 ATPase, F complex, gamma subunit	Atlas	Cp	1	Y	Cp	Cp	13	Cp	98.8	AT4G04640*	thylakoid-peripheral-stromal-side	plastid	plastid
Solyc02g062130.2.1*	Ferredoxin--NADP reductase (AHRD V ***- D7MN04_ARALY); contains Interpro domain(s) IPR0246 Ferredoxin--NADP reductase	Atlas	Cp	1	Y	Cp	Cp	11	Cp	100	AT1G20020*	thylakoid-peripheral-stromal-side	plastid	plastid
Solyc12g096700.1.1*	Ribosomal L9-like protein (AHRD V1 ***- B3TLR1_ELAGV); contains Interpro domain(s) IPR002359 Ribosomal protein L6, conserved site-2	-	-	-	-	-	-	-	-	-	AT1G33120*	-	C, plastid	plastid
Solyc12g096700.1.1*	Ribosomal L9-like protein (AHRD V1 ***- B3TLR1_ELAGV); contains Interpro domain(s) IPR002359 Ribosomal protein L6, conserved site-2	-	-	-	-	-	-	-	-	-	AT1G33140*	-	C, plastid	plastid
Solyc12g096680.1.1	Pentatricopeptide repeat-containing protein (AHRD V1 ***- D7L4A8_ARALY); contains Interpro domain(s) IPR002885 Pentatricopeptide repeat	-	-	-	-	-	-	-	-	-	AT2G03880	-	M, plastid	-
Solyc02g062130.2.1*	Ferredoxin--NADP reductase (AHRD V ***- D7MN04_ARALY); contains Interpro domain(s) IPR0246 Ferredoxin--NADP reductase	Atlas	Cp	1	Y	Cp	Cp	11	Cp	100	AT5G66190*	thylakoid-peripheral-stromal-side	plastid	plastid
Solyc01g104320.2.1	PAP fibrillin (AHRD V ***- A2Q498_MEDTR); contains Interpro domain(s) IPR006843 PAP fibrillin	Atlas	Cp	1	Y	Cp	Cp	12	Cp	99.9	AT3G26080*	thylakoid-peripheral-stromal-side	plastid	plastid
Solyc12g096580.1.1	Potassium transporter (AHRD V1 ***- Q1T722_PHRAU); contains Interpro domain(s) IPR018519 Potassium uptake protein, kup IPR003855 K+ potassium transporter	-	-	-	-	-	-	-	-	-	AT4G23620*	-	M, plastid	-
Solyc01g103920.2.1	Ferredoxin I (AHRD V ***- Q93XJ9_SOLTU); contains Interpro domain(s) IPR0024 Ferredoxin [2Fe-2S], plant	Atlas	-	5	Y	Cp	Cp	9	Cp	100	AT1G10960*	thylakoid-peripheral-stromal-side	plastid	-
Solyc01g100650.2.1	NHL repeat containing 2 (AHRD V *--- B2RR26_MOUSE); contains Interpro domain(s) IPR0042 Six-bladed beta-propeller, TolB-like	Atlas	M	3	Y	possibly M	Cp	11	ER	87.8	AT1G56500	thylakoid-peripheral-stromal-side	plastid	plastid
Solyc01g091580.2.1	Signal recognition particle-docking protein FtsY (AHRD V ***- A7H885_ANADF); contains Interpro domain(s) IPR004390 Cell division transporter substrate-binding protein FtsY	Atlas	Cp	4	Y	Cp	Cp	9	C	94.3	AT2G45770	thylakoid-peripheral-stromal-side	plastid	-
Solyc01g005520.2.1	Tetratricopeptide TPR_2 repeat protein (AHRD V *--- A8ZVN6_DESOH); contains Interpro domain(s) IPR00478 PDZ/DHR/GLGF	Atlas	Cp	1	Y	Cp	Cp	11	C	86.4	AT1G55480	thylakoid-peripheral-stromal-side	plastid	plastid
544163668	NADH_plastoquinone oxidoreductase subunit I (chloroplast) [Solanum lycopersicum]	Atlas	-	-	-	-	-	-	-	-	ATCG01090*	thylakoid-peripheral-stromal-side	plastid	-
544163665	photosystem I subunit VII (chloroplast) [Solanum lycopersicum]	Atlas	-	-	-	-	-	-	-	-	ATCG01060	thylakoid-peripheral-stromal-side	plastid	-
Solyc12g096420.1.1	RING-finger protein like (AHRD V1 *-*- B6SVN2_MAIZE); contains Interpro domain(s) IPR018957 Zinc finger, C3HC4 RING-type	-	-	-	-	-	-	-	-	-	AT5G24870*	-	N, plastid	-
544163661	NADH_plastoquinone oxidoreductase subunit 5 (chloroplast) [Solanum lycopersicum]	Atlas	-	-	-	-	-	-	-	-	ATCG01010	thylakoid-peripheral-stromal-side	plastid	-
544163620	ATP synthase CF1 beta subunit (chloroplast) [Solanum lycopersicum]	Atlas	-	-	-	-	-	-	-	-	ATCG00480	thylakoid-peripheral-stromal-side	plastid	-
Solyc12g096330.1.1	Ribosomal RNA large subunit methyltransferase H (AHRD V1 ***- A3UBP0_CROAH); contains Interpro domain(s) IPR003742 SPOUT methyltransferase, predi	-	-	-	-	-	-	-	-	-	AT5G10620	plastid	-	-
Solyc12g096320.1.1	ChaC cation transport regulator-like 1 (AHRD V1 ***- A8KBI8_DANRE); contains Interpro domain(s) IPR006840 ChaC-like protein	-	-	-	-	-	-	-	-	-	AT4G31290*	plastid	-	-
Solyc12g096300.1.1	40S ribosomal protein S6 (AHRD V1 ***- B6T1H0_MAIZE); contains Interpro domain(s) IPR014401 Ribosomal protein S6, eukaryotic	-	-	-	-	-	-	-	-	-	AT4G31700*	-	C, plastid	plastid
544163619	ATP synthase CF1 epsilon subunit (chloroplast) [Solanum lycopersicum]	Atlas	-	-	-	-	-	-	-	-	ATCG00470	thylakoid-peripheral-stromal-side	plastid	-
544163614	photosystem I assembly protein ycf3 (chloroplast) [Solanum lycopersicum]	Atlas	-	-	-	-	-	-	-	-	ATCG00360	thylakoid-peripheral-stromal-side	plastid	-
544163598	ATP synthase CF1 alpha subunit (chloroplast) [Solanum lycopersicum]	Atlas	-	-	-	-	-	-	-	-	ATCG00120	thylakoid-peripheral-stromal-side	plastid	-
Solyc12g007120.1.1*	Signal peptidase I (AHRD V *-*- BWP5_CYAA5); contains Interpro domain(s) IPR000223 Peptidase S26A, signal peptidase I	Atlas	Cp	1	Y	Cp	Cp	12	Cp	44.9	AT1G06870*	thylakoid-peripheral-lumenal-side; envelope-inner	-	-
Solyc04g079550.2.1*	Signal peptidase I (AHRD V *-*- B4WT4_9CYAN); contains Interpro domain(s) IPR000223 Peptidase S26A, signal peptidase I	Atlas	Cp	5	Y	Cp	Cp	12	Cp	81.2	AT1G06870*	thylakoid-peripheral-lumenal-side; envelope-inner	-	-
Solyc12g007120.1.1*	Signal peptidase I (AHRD V *-*- BWP5_CYAA5); contains Interpro domain(s) IPR000223 Peptidase S26A, signal peptidase I	Atlas	Cp	1	Y	Cp	Cp	12	Cp	44.9	AT3G24590	thylakoid-peripheral-lumenal-side; envelope	plastid	plastid
Solyc12g097030.1.1	Carboxyl-terminal processing protease (AHRD V ***- Q5N58_SYNP6); contains Interpro domain(s) IPR0055 Peptidase S4	Atlas	Cp	4	Y	Cp	Cp	16	C	60.4	AT4G17740	thylakoid-peripheral-lumenal-side	plastid	plastid
Solyc12g096000.1.1*	ATP-dependent RNA helicase eIF4A (AHRD V1 ***- A8PG49_COPC7); contains Interpro domain(s) IPR011545 DNA/RNA helicase, DEAD/DEAH box type, N-terminal	-	-	-	-	-	-	-	-	-	AT1G54270*	-	C, plastid	-
Solyc12g096000.1.1*	ATP-dependent RNA helicase eIF4A (AHRD V1 ***- A8PG49_COPC7); contains Interpro domain(s) IPR011545 DNA/RNA helicase, DEAD/DEAH box type, N-terminal	-	-	-	-	-	-	-	-	-	AT3G13920*	-	C, plastid	-
Solyc12g095990.1.1*	ATP-dependent RNA helicase eIF4A (AHRD V1 ***- A8PG49_COPC7); contains Interpro domain(s) IPR011545 DNA/RNA helicase, DEAD/DEAH box type, N-termial	-	-	-	-	-	-	-	-	-	AT1G54270*	-	C, plastid	-
Solyc12g095990.1.1*	ATP-dependent RNA helicase eIF4A (AHRD V1 ***- A8PG49_COPC7); contains Interpro domain(s) IPR011545 DNA/RNA helicase, DEAD/DEAH box type, N-termial	-	-	-	-	-	-	-	-	-	AT3G13920*	-	C, plastid	-
Solyc12g094720.1.1	PsbP domain-containing protein 3, chloroplastic (AHRD V ***- PPD3_ARATH); contains Interpro domain(s) IPR0623 Mog/PsbP, alpha/beta/alpha sandwich	Atlas	Cp	2	Y	Cp	Cp	20	Cp	100	AT1G76450	thylakoid-peripheral-lumenal-side	plastid	plastid
Solyc12g013580.1.1	Peptidyl-prolyl cis-trans isomerase cyclophilin-type (AHRD V ***- A8INE5_CHLRE); contains Interpro domain(s) IPR00230 Peptidyl-prolyl cis-trans isomerase, cyclophilin-type	Atlas	Cp	3	Y	Cp	Cp	10	Cp	100	AT3G15520	thylakoid-peripheral-lumenal-side	plastid	plastid
Solyc12g009600.1.1	Thylakoid lumenal protein (AHRD V ***- B6SU36_MAIZE)	Atlas	Cp	2	Y	Cp	Cp	13	N	44.8	AT4G02530	thylakoid-peripheral-lumenal-side	plastid	plastid
Solyc12g005630.1.1	Cytochrome b6-f complex iron-sulfur subunit (AHRD V ***- A9PEX3_POPTR); contains Interpro domain(s) IPR005805 Rieske iron-sulphur protein, C-terminal	Atlas	Cp	3	Y	Cp	Cp	7	Cp	99.9	AT4G03280	thylakoid-peripheral-lumenal-side	plastid	plastid
Solyc12g005180.1.1	Chloroplast lipocalin (AHRD V ***- Q38JB4_SOLTU); contains Interpro domain(s) IPR03208 Lipocalin-like	Atlas	Cp	4	Y	Cp	Cp	12	C	55.2	AT3G47860	thylakoid-peripheral-lumenal-side	plastid	plastid
Solyc10g084040.1.1	Thylakoid lumen 5.0-kDa protein (Fragment) (AHRD V **-- B8CL2_THAPS)	Atlas	Cp	1	Y	Cp	Cp	10	Cp	99.8	AT5G52970	thylakoid-peripheral-lumenal-side	plastid	plastid
Solyc10g054420.1.1	Photosystem II oxygen evolving complex protein PsbP (AHRD V ***- A0YXJ6_LYNSP); contains Interpro domain(s) IPR002683 Photosystem II oxygen evolving complex protein PsbP	Atlas	Cp	1	Y	Cp	Cp	13	Cp	100	AT2G39470	thylakoid-peripheral-lumenal-side	plastid	plastid
Solyc10g039270.1.1	Peptidyl-prolyl cis-trans isomerase (AHRD V *-** C6E462_GEOSM); contains Interpro domain(s) IPR0079 Peptidyl-prolyl cis-trans isomerase, FKBP-type	Atlas	Cp	5	Y	possibly M	Cp	14	Cp	90.3	AT3G60370	thylakoid-peripheral-lumenal-side	plastid	plastid
Solyc10g006530.2.1*	Oxygen evolving enhancer 3 family protein (AHRD V *-*- D7L9Q0_ARALY); contains Interpro domain(s) IPR008797 Photosystem II oxygen evolving complex protein PsbQ	Atlas	Cp	4	-	-	Cp	1	Cp	99.3	AT3G01440	thylakoid-peripheral-lumenal-side	plastid	plastid
Solyc10g006530.2.1*	Oxygen evolving enhancer 3 family protein (AHRD V *-*- D7L9Q0_ARALY); contains Interpro domain(s) IPR008797 Photosystem II oxygen evolving complex protein PsbQ	Atlas	Cp	4	-	-	Cp	1	Cp	99.3	AT4G21280*	thylakoid-peripheral-lumenal-side	plastid	plastid
Solyc12g094650.1.1	Genomic DNA chromosome 5 P1 clone MFC19 (AHRD V1 ***- Q9FHI2_ARATH); contains Interpro domain(s) IPR007658 Protein of unknown function DUF594	-	-	-	-	-	-	-	-	-	AT5G45540*	-	Cp	-
Solyc09g076030.2.1	Chromosome 04 contig DNA sequence (AHRD V *-*- Q0AH6_OSTTA)	Atlas	Cp	3	Y	Cp	Cp	8	C	38	AT1G05385	thylakoid-peripheral-lumenal-side	plastid	-
Solyc09g064500.2.1	Photosystem II reaction center psb28 protein (AHRD V ***- C6SZM2_SOYBN); contains Interpro domain(s) IPR00560 Photosystem II protein Psb28, class	Atlas	Cp	2	Y	Cp	Cp	13	Cp	100	AT4G28660	thylakoid-peripheral-lumenal-side	plastid	plastid
Solyc09g008650.2.1	Peptidyl-prolyl cis-trans isomerase (AHRD V ***- B8HUH5_CYAP4); contains Interpro domain(s) IPR0079 Peptidyl-prolyl cis-trans isomerase, FKBP-type	Atlas	M	5	Y	possibly Cp	Cp	12	Cp	100	AT3G10060	thylakoid-peripheral-lumenal-side	plastid	plastid
Solyc12g094620.1.1*	Catalase (AHRD V1 ***- Q2PYW5_SOLTU); contains Interpro domain(s) IPR018028 Catalase related subgroup	-	-	-	-	-	-	-	-	-	AT1G20620	-	P, plastid	plastid
Solyc12g094620.1.1*	Catalase (AHRD V1 ***- Q2PYW5_SOLTU); contains Interpro domain(s) IPR018028 Catalase related subgroup	-	-	-	-	-	-	-	-	-	AT1G20630*	-	P, plastid	plastid
Solyc12g094620.1.1*	Catalase (AHRD V1 ***- Q2PYW5_SOLTU); contains Interpro domain(s) IPR018028 Catalase related subgroup	-	-	-	-	-	-	-	-	-	AT4G35090*	-	P, plastid	-
Solyc08g079110.2.1	Pentapeptide repeat (AHRD V *-*- Q4C7L8_CROWT); contains Interpro domain(s) IPR00646 Pentapeptide repeat	Atlas	Cp	2	-	Cp	Cp	9	Cp	100	AT1G12250	thylakoid-peripheral-lumenal-side	plastid	plastid
Solyc12g094570.1.1	Os03g0133300 protein (Fragment) (AHRD V1 ***- Q0DVF0_ORYSJ)	-	-	-	-	-	-	-	-	-	AT1G42430*	plastid stroma	-	-
Solyc08g067840.2.1	PsbP domain-containing protein 5, chloroplastic (AHRD V **-- PPD5_ARATH); contains Interpro domain(s) IPR0623 Mog/PsbP, alpha/beta/alpha sandwich	Atlas	Cp	2	Y	Cp	Cp	21	Cp	98.8	AT5G11450	thylakoid-peripheral-lumenal-side	plastid	plastid
Solyc08g048550.2.1*	Protease Do-like (S2 serine-type protease) (AHRD V **** A6CGY_9PLAN); contains Interpro domain(s) IPR00254 Peptidase S and S6, chymotrypsin/Hap	Atlas	Cp	5	Y	Cp	Cp	9	Cp	99.4	AT3G27925*	thylakoid-peripheral-lumenal-side	plastid	plastid
Solyc08g048550.2.1*	Protease Do-like (S2 serine-type protease) (AHRD V **** A6CGY_9PLAN); contains Interpro domain(s) IPR00254 Peptidase S and S6, chymotrypsin/Hap	Atlas	Cp	5	Y	Cp	Cp	9	Cp	99.4	AT4G18370	thylakoid-peripheral-lumenal-side	plastid	plastid
Solyc12g094440.1.1	High mobility group family (Fragment) (AHRD V1 **-- B9GFX2_POPTR); contains Interpro domain(s) IPR001606 AT-rich interaction region	-	-	-	-	-	-	-	-	-	AT1G76110*	-	N, plastid	-
Solyc12g094430.1.1*	Glutathione S-transferase (AHRD V1 ***- C7F8A3_ARAHY); contains Interpro domain(s) IPR004046 Glutathione S-transferase, C-terminal	-	-	-	-	-	-	-	-	-	AT2G30860	-	C, plastid	plastid
Solyc12g094430.1.1*	Glutathione S-transferase (AHRD V1 ***- C7F8A3_ARAHY); contains Interpro domain(s) IPR004046 Glutathione S-transferase, C-terminal	-	-	-	-	-	-	-	-	-	AT2G30870	-	C, plastid	-
Solyc12g094420.1.1	Predicted mechanosensitive ion channel (AHRD V1 ***- Q2TZV3_ASPOR); contains Interpro domain(s) IPR016688 Membrane protein, At2g17000, predicted	-	-	-	-	-	-	-	-	-	AT1G53470*	-	PM, plastid	-
Solyc12g089310.1.1	Tubulin beta-1 chain (AHRD V1 ***- D7KT68_ARALY); contains Interpro domain(s) IPR002453 Beta tubulin	-	-	-	-	-	-	-	-	-	AT1G20010*	-	C, plastid	plastid
Solyc08g013670.2.1	Photosystem I reaction center subunit (AHRD V ***- D2K7Z2_TOBAC); contains Interpro domain(s) IPR008796 Photosystem I reaction centre subunit N	Atlas	Cp	1	Y	Cp	Cp	14	Cp	100	AT5G64040	thylakoid-peripheral-lumenal-side	plastid	plastid
Solyc07g054290.1.1	Photosystem II family protein (AHRD V *-*- D7KCG4_ARALY)	Atlas	Cp	2	Y	M	Cp	13	Cp	96.5	AT1G03600	thylakoid-peripheral-lumenal-side	plastid	plastid
Solyc12g089220.1.1*	Wound responsive protein (Fragment) (AHRD V1 *--- A6N0L4_ORYSI); contains Interpro domain(s) IPR003729 Protein of unknown function DUF151	-	-	-	-	-	-	-	-	-	AT1G19660*	plastid	plastid	-
Solyc12g089220.1.1*	Wound responsive protein (Fragment) (AHRD V1 *--- A6N0L4_ORYSI); contains Interpro domain(s) IPR003729 Protein of unknown function DUF151	-	-	-	-	-	-	-	-	-	AT1G75380*	plastid	-	-
Solyc07g044860.2.1*	Oxygen-evolving enhancer protein 2, chloroplastic (AHRD V ***- PSBP_SOLLC); contains Interpro domain(s) IPR002683 Photosystem II oxygen evolving complex protein PsbP	Atlas	Cp	3	Y	Cp	Cp	12	Cp	100	AT1G06680	thylakoid-peripheral-lumenal-side	plastid	plastid
Solyc12g089200.1.1	Peptidyl-prolyl cis-trans isomerase-like 4 (AHRD V1 ***- C3KHN3_ANOFI); contains Interpro domain(s) IPR002130 Peptidyl-prolyl cis-trans isomerase, cyclophilin-type	-	-	-	-	-	-	-	-	-	AT1G53720*	-	N, plastid	-
Solyc12g089100.1.1*	Pore protein of (OEP24) (AHRD V1 **-- O49929_PEA)	-	-	-	-	-	-	-	-	-	AT1G45170*	envelope-outer	M, plastid	-
Solyc12g089100.1.1*	Pore protein of (OEP24) (AHRD V1 **-- O49929_PEA)	-	-	-	-	-	-	-	-	-	AT5G42960*	envelope-outer	plastid	plastid
Solyc12g089090.1.1	Phosphatase PTC7 homolog (AHRD V1 *-*- C1BT38_9MAXI); contains Interpro domain(s) IPR001932 Protein phosphatase 2C-related	-	-	-	-	-	-	-	-	-	AT5G66720*	plastid stroma	plastid	-
Solyc07g044860.2.1*	Oxygen-evolving enhancer protein 2, chloroplastic (AHRD V ***- PSBP_SOLLC); contains Interpro domain(s) IPR002683 Photosystem II oxygen evolving complex protein PsbP	Atlas	Cp	3	Y	Cp	Cp	12	Cp	100	AT2G30790	thylakoid-peripheral-lumenal-side	plastid	plastid
Solyc07g032640.1.1	Oxygen-evolving enhancer protein , chloroplastic (AHRD V ***- PSBO_SOLTU); contains Interpro domain(s) IPR002628 Photosystem II manganese-stabilizing protein PsbO	Atlas	Cp	3	Y	Cp	Cp	13	Cp	100	AT5G66570*	thylakoid-peripheral-lumenal-side	plastid	plastid
Solyc07g032620.1.1	Oxygen-evolving enhancer protein , chloroplastic (AHRD V ***- PSBO_SOLTU); contains Interpro domain(s) IPR002628 Photosystem II manganese-stabilizing protein PsbO	Atlas	-	5	-	-	Cp	6	Cp	98.9	AT5G66570*	thylakoid-peripheral-lumenal-side	plastid	plastid
Solyc06g076480.2.1	Pentapeptide repeat-containing protein (AHRD V *-*- D8G5N8_9CYAN); contains Interpro domain(s) IPR00646 Pentapeptide repeat	Atlas	Cp	1	Y	Cp	Cp	9	Cp	100	AT2G44920	thylakoid-peripheral-lumenal-side	plastid	plastid
Solyc12g088900.1.1	Unknown Protein (AHRD V1)	-	-	-	-	-	-	-	-	-	AT1G47260*	-	M, plastid	plastid
Solyc06g065490.2.1	PsbP domain-containing protein 6, chloroplastic (AHRD V ***- PPD6_ARATH); contains Interpro domain(s) IPR0623 Mog/PsbP, alpha/beta/alpha sandwich	Atlas	Cp	2	Y	Cp	Cp	14	Cp	100	AT3G56650	thylakoid-peripheral-lumenal-side	plastid	plastid
Solyc05g007780.2.1	Oxygen evolving enhancer protein 3 (AHRD V ***- B6SZC8_MAIZE); contains Interpro domain(s) IPR008797 Photosystem II oxygen evolving complex protein PsbQ	Atlas	Cp	4	Y	possibly Cp	Cp	7	M	84.1	AT1G14150	thylakoid-peripheral-lumenal-side	plastid	plastid
Solyc04g082660.2.1	Peptidyl-prolyl cis-trans isomerase (AHRD V *-*- A8YBJ2_MICAE); contains Interpro domain(s) IPR0079 Peptidyl-prolyl cis-trans isomerase, FKBP-type	Atlas	Cp	1	Y	Cp	Cp	14	Cp	99.6	AT1G20810	thylakoid-peripheral-lumenal-side	plastid	plastid
Solyc12g088670.1.1	Cathepsin B-like cysteine proteinase (AHRD V1 **-- CYSP_SCHMA); contains Interpro domain(s) IPR013128 Peptidase C1A, papain IPR000169 Peptidase, cysteine peptidase active site IPR000668 Peptidase C1A, papain C-terminal	-	-	-	-	-	-	-	-	-	AT1G47128*	-	EX, plastid	plastid
Solyc04g082010.1.1*	Plastocyanin (AHRD V ***- Q0W9E5_SOLCO); contains Interpro domain(s) IPR000923 Blue (type ) copper domain	Atlas	Cp	1	Y	Cp	Cp	14	Cp	100	AT1G20340	thylakoid-peripheral-lumenal-side	plastid	plastid
Solyc04g082010.1.1*	Plastocyanin (AHRD V ***- Q0W9E5_SOLCO); contains Interpro domain(s) IPR000923 Blue (type ) copper domain	Atlas	Cp	1	Y	Cp	Cp	14	Cp	100	AT1G76100	thylakoid-peripheral-lumenal-side	plastid	plastid
Solyc04g074640.2.1	L-ascorbate peroxidase (AHRD V ***- A8JG56_CHLRE); contains Interpro domain(s) IPR002207 Plant ascorbate peroxidase	Atlas	Cp	3	Y	Cp	Cp	9	Cp	100	AT4G09010	thylakoid-peripheral-lumenal-side	plastid	plastid
Solyc12g088380.1.1	Helix-loop-helix DNA-binding domain containing protein (AHRD V1 *--- Q2QMV9_ORYSJ)	-	-	-	-	-	-	-	-	-	AT2G14760*	-	N, plastid	-
Solyc12g088320.1.1	LIM domain protein (AHRD V1 **-- Q306K1_BRANA); contains Interpro domain(s) IPR001781 Zinc finger, LIM-type	-	-	-	-	-	-	-	-	-	AT1G10200*	-	C, plastid	-
Solyc04g064670.2.1	Thylakoid lumenal 9 kDa protein, chloroplastic (AHRD V *-*- TL9_ARATH); contains Interpro domain(s) IPR0623 Mog/PsbP, alpha/beta/alpha sandwich	Atlas	Cp	3	Y	Cp	Cp	6	Cp	100	AT1G77090	thylakoid-peripheral-lumenal-side	plastid	plastid
Solyc12g088220.1.1	Branched-chain-amino-acid aminotransferase (AHRD V1 ***- Q94CF8_CAPAN); contains Interpro domain(s) IPR005786 Branched-chain amino acid aminotransferase II	-	-	-	-	-	-	-	-	-	AT1G10070*	-	Cp	-
Solyc04g054520.2.1	Peptidyl-prolyl cis-trans isomerase (AHRD V *-*- D8PA4_9BACT); contains Interpro domain(s) IPR0079 Peptidyl-prolyl cis-trans isomerase, FKBP-type	Atlas	Cp	5	Y	Cp	Cp	2	Cp	85.5	AT4G39710	thylakoid-peripheral-lumenal-side	plastid	plastid
Solyc04g050930.2.1	Violaxanthin de-epoxidase	Atlas	Cp	4	-	Cp	Cp	14	C	83	AT1G08550	thylakoid-peripheral-lumenal-side	plastid	plastid
Solyc04g015040.2.1	Peptidyl-prolyl cis-trans isomerase (AHRD V ***- CFEU4_9CHLO); contains Interpro domain(s) IPR0079 Peptidyl-prolyl cis-trans isomerase, FKBP-type	Atlas	Cp	2	Y	Cp	Cp	15	ER	66.4	AT2G43560	thylakoid-peripheral-lumenal-side	plastid	plastid
Solyc04g009420.2.1	Photosystem II oxygen evolving complex protein PsbP (AHRD V ***- QA6_TRIEI); contains Interpro domain(s) IPR0623 Mog/PsbP, alpha/beta/alpha sandwich	Atlas	Cp	2	Y	possibly Cp	Cp	16	Cp	99.7	AT2G28605	thylakoid-peripheral-lumenal-side	plastid	plastid
Solyc12g087940.1.1	Aspartic proteinase nepenthesin-1 (AHRD V1 **-- B6TE66_MAIZE); contains Interpro domain(s) IPR001461 Peptidase A1	-	-	-	-	-	-	-	-	-	AT3G54400*	-	EX, plastid	plastid
Solyc03g119150.2.1*	Peptidyl-prolyl cis-trans isomerase (AHRD V *-*- B4VX45_9CYAN); contains Interpro domain(s) IPR0079 Peptidyl-prolyl cis-trans isomerase, FKBP-type	Atlas	Cp	1	Y	Cp	Cp	12	Cp	94.4	AT1G18170	thylakoid-peripheral-lumenal-side	plastid	plastid
Solyc03g114930.2.1	Photosystem II oxygen evolving complex protein PsbP (AHRD V ***- A0ZMM6_NODSP); contains Interpro domain(s) IPR0623 Mog/PsbP, alpha/beta/alpha sandwich	Atlas	Cp	4	Y	Cp	Cp	14	Cp	100	AT3G55330	thylakoid-peripheral-lumenal-side	plastid	plastid
Solyc12g077580.1.1	40S ribosomal protein S13 (AHRD V1 *-*- D7LRU2_ARALY); contains Interpro domain(s) IPR009068 S15/NS1, RNA-binding	-	-	-	-	-	-	-	-	-	AT3G60770*	-	C, plastid	plastid
Solyc03g082890.2.1	Pentapeptide repeat protein (AHRD V *-*- B4WQI2_9SYNE); contains Interpro domain(s) IPR00646 Pentapeptide repeat	Atlas	M	5	-	possibly M	Cp	9	Cp	100	AT5G53490	thylakoid-peripheral-lumenal-side	plastid	plastid
Solyc03g059260.2.1	Carboxyl-terminal-processing protease (AHRD V ***- B6T6L2_MAIZE); contains Interpro domain(s) IPR004447 Peptidase S4A, C-terminal protease	Atlas	Cp	5	-	-	Cp	13	C	50.9	AT3G57680	thylakoid-peripheral-lumenal-side	-	-
Solyc03g019660.2.1	Thylakoid lumenal 7.9 kDa protein, chloroplastic (AHRD V ***- TLY_ARATH)	Atlas	Cp	5	Y	Cp	Cp	14	Cp	99.6	AT4G24930	thylakoid-peripheral-lumenal-side	plastid	plastid
Solyc02g090030.2.1*	Oxygen-evolving enhancer protein of photosystem II (AHRD V ***- A8J0E4_CHLRE); contains Interpro domain(s) IPR002628 Photosystem II manganese-stabilizing protein PsbO	Atlas	Cp	3	Y	Cp	Cp	13	Cp	100	AT3G50820*	thylakoid-peripheral-lumenal-side	plastid	plastid
Solyc02g090030.2.1*	Oxygen-evolving enhancer protein of photosystem II (AHRD V ***- A8J0E4_CHLRE); contains Interpro domain(s) IPR002628 Photosystem II manganese-stabilizing protein PsbO	Atlas	Cp	3	Y	Cp	Cp	13	Cp	100	AT5G66570*	thylakoid-peripheral-lumenal-side	plastid	plastid
Solyc02g086910.2.1	Peptidyl-prolyl cis-trans isomerase cyclophilin-type (AHRD V ***- A8IRU6_CHLRE); contains Interpro domain(s) IPR00230 Peptidyl-prolyl cis-trans isomerase, cyclophilin-type	Atlas	Cp	3	Y	Cp	Cp	13	Cp	98.9	AT3G01480	thylakoid-peripheral-lumenal-side	plastid	plastid
Solyc12g070280.1.1	Lipid A export ATP-binding/permease protein MsbA (AHRD V1 ***- B9NVE8_9RHOB); contains Interpro domain(s) IPR003439 ABC transporter-like	-	-	-	-	-	-	-	-	-	AT1G70610*	envelope-inner-integral	Cp	-
Solyc02g086830.2.1	Protease Do-like (S2 serine-type protease) (AHRD V **** Q7UQ70_RHOBA); contains Interpro domain(s) IPR00254 Peptidase S and S6, chymotrypsin/Hap	Atlas	Cp	2	Y	Cp	Cp	10	Cp	99.9	AT3G27925*	thylakoid-peripheral-lumenal-side	plastid	plastid
Solyc02g079950.2.1*	Oxygen-evolving enhancer protein 3 (AHRD V ***- Q7YT5_PEA); contains Interpro domain(s) IPR008797 Photosystem II oxygen evolving complex protein PsbQ	Atlas	Cp	2	Y	Cp	Cp	14	Cp	100	AT4G05180	thylakoid-peripheral-lumenal-side	plastid	plastid
Solyc02g079950.2.1*	Oxygen-evolving enhancer protein 3 (AHRD V ***- Q7YT5_PEA); contains Interpro domain(s) IPR008797 Photosystem II oxygen evolving complex protein PsbQ	Atlas	Cp	2	Y	Cp	Cp	14	Cp	100	AT4G21280*	thylakoid-peripheral-lumenal-side	plastid	plastid
Solyc02g071190.2.1	Carboxyl-terminal-processing protease (AHRD V ***- B6SPN8_MAIZE); contains Interpro domain(s) IPR004447 Peptidase S4A, C-terminal protease	Atlas	Cp	2	Y	-	Cp	1	Cp	70.5	AT5G46390	thylakoid-peripheral-lumenal-side	plastid	plastid
Solyc02g068930.2.1	Cytochrome c6 (AHRD V ***- D7MKY9_ARALY); contains Interpro domain(s) IPR003088 Cytochrome c, class I	Atlas	Cp	4	-	-	Cp	6	Cp	99.3	AT5G45040	thylakoid-peripheral-lumenal-side	-	-
Solyc02g067360.2.1*	Protease Do-like (S2 serine-type protease) (AHRD V **** Q7UQ70_RHOBA); contains Interpro domain(s) IPR00254 Peptidase S and S6, chymotrypsin/Hap	Atlas	Cp	5	Y	Cp	Cp	12	C	69.4	AT3G27925*	thylakoid-peripheral-lumenal-side	plastid	plastid
Solyc02g067360.2.1*	Protease Do-like (S2 serine-type protease) (AHRD V **** Q7UQ70_RHOBA); contains Interpro domain(s) IPR00254 Peptidase S and S6, chymotrypsin/Hap	Atlas	Cp	5	Y	Cp	Cp	12	C	69.4	AT5G39830	thylakoid-peripheral-lumenal-side	plastid	plastid
Solyc12g062820.1.1*	Pentatricopeptide repeat-containing protein (AHRD V1 ***- D7M697_ARALY); contains Interpro domain(s) IPR002885 Pentatricopeptide repeat	-	-	-	-	-	-	-	-	-	AT4G18750*	plastid	plastid	-
Solyc12g062820.1.1*	Pentatricopeptide repeat-containing protein (AHRD V1 ***- D7M697_ARALY); contains Interpro domain(s) IPR002885 Pentatricopeptide repeat	-	-	-	-	-	-	-	-	-	AT5G27110*	-	M, plastid	-
Solyc12g062790.1.1	Histidine decarboxylase (AHRD V1 *-*- Q9MA74_ARATH); contains Interpro domain(s) IPR002129 Pyridoxal phosphate-dependent decarboxylase	-	-	-	-	-	-	-	-	-	AT1G65960*	-	C, plastid	-
Solyc02g065400.2.1*	Oxygen-evolving enhancer protein of photosystem II (AHRD V ***- A8J0E4_CHLRE); contains Interpro domain(s) IPR002628 Photosystem II manganese-stabilizing protein PsbO	Atlas	Cp	4	Y	Cp	Cp	13	Cp	100	AT3G50820*	thylakoid-peripheral-lumenal-side	plastid	plastid
Solyc02g065400.2.1*	Oxygen-evolving enhancer protein of photosystem II (AHRD V ***- A8J0E4_CHLRE); contains Interpro domain(s) IPR002628 Photosystem II manganese-stabilizing protein PsbO	Atlas	Cp	4	Y	Cp	Cp	13	Cp	100	AT5G66570*	thylakoid-peripheral-lumenal-side	plastid	plastid
Solyc12g062670.1.1	HNH endonuclease domain-containing protein (Fragment) (AHRD V1 ***- C6F7M2_PSEMZ)	-	-	-	-	-	-	-	-	-	AT3G47490*	plastid	plastid	-
Solyc02g014150.2.1	Photosystem II stability/assembly factor Ycf48-like protein (AHRD V **-- B0C6T3_ACAM); contains Interpro domain(s) IPR06705 Photosystem II stability/assembly factor, HCF36	Atlas	Cp	2	Y	-	Cp	8	Cp	94.7	AT5G23120	thylakoid-peripheral-lumenal-side	plastid	plastid
Solyc12g062640.1.1	30S ribosomal protein S2 (AHRD V1 ***- RS2_ANAVT); contains Interpro domain(s) IPR005706 Ribosomal protein S2, bacterial-type	-	-	-	-	-	-	-	-	-	ATCG00160*	plastid ribosome	plastid	-
Solyc01g106090.2.1	Photosystem II oxygen evolving complex protein PsbP (AHRD V *-*- B8HJK6_CYAP4); contains Interpro domain(s) IPR002683 Photosystem II oxygen evolving complex protein PsbP	Atlas	M	3	-	-	Cp	11	Cp	100	AT4G15510	thylakoid-peripheral-lumenal-side	plastid	plastid
Solyc01g098640.2.1	UPF0603 protein Atg54780, chloroplastic (AHRD V **-- U603_ARATH); contains Interpro domain(s) IPR00762 Protein of unknown function DUF477	Atlas	Cp	1	Y	Cp	Cp	7	Cp	99.7	AT1G54780	thylakoid-peripheral-lumenal-side	plastid	plastid
Solyc01g009990.2.1*	Peptidyl-prolyl cis-trans isomerase (AHRD V ***- B9RMA5_RICCO); contains Interpro domain(s) IPR00230 Peptidyl-prolyl cis-trans isomerase, cyclophilin-type	Atlas	Cp	1	Y	Cp	Cp	14	Cp	99.9	AT5G13120	thylakoid-peripheral-lumenal-side	plastid	plastid
Solyc01g006130.2.1	Homology to unknown gene (AHRD V *-*- Q00T6_OSTTA); contains Interpro domain(s) IPR00305 Heat shock protein DnaJ, cysteine-rich region	Atlas	Cp	1	Y	Cp	Cp	10	C	72.1	AT2G34860	thylakoid-peripheral-lumenal-side	plastid	plastid
Solyc00g006810.2.1	Peptidyl-prolyl cis-trans isomerase (AHRD V *-*- Q8DJW8_THEEB); contains Interpro domain(s) IPR0079 Peptidyl-prolyl cis-trans isomerase, FKBP-type	Atlas	Cp	1	Y	Cp	Cp	17	Cp	100	AT5G13410	thylakoid-peripheral-lumenal-side	plastid	plastid
544163663	cytochrome c heme attachment protein (chloroplast) [Solanum lycopersicum]	Atlas	-	-	-	-	-	-	-	-	ATCG01040	thylakoid-peripheral-lumenal-side	plastid	-
Solyc03g114450.2.1*	Extracellular calcium sensing receptor (AHRD V ***- C7BCU7_LIQFO); contains Interpro domain(s) IPR00763 Rhodanese-like	Atlas	Cp	2	Y	Cp	Cp	12	Cp	99.5	AT5G23060	thylakoid-integral; M	plastid	plastid
Solyc12g062530.1.1	ATP synthase subunit beta chloroplastic (AHRD V1 ***- Q9TMV1_9LILI); contains Interpro domain(s) IPR005722 ATPase, F1 complex, beta subunit	-	-	-	-	-	-	-	-	-	AT5G08670*	-	M, plastid	plastid
Solyc12g062510.1.1	ATPase (AHRD V1 ***- C0SAL8_PARBP); contains Interpro domain(s) IPR001757 ATPase, P-type, K/Mg/Cd/Cu/Zn/Na/Ca/Na/H-transporter	-	-	-	-	-	-	-	-	-	AT1G26130*	-	PM, plastid	plastid
Solyc09g065160.2.1	Dynamin family protein (AHRD V *--- D0MDN4_RHOM4); contains Interpro domain(s) IPR0040 Dynamin, GTPase region	Atlas	Cp	2	Y	Cp	Cp	12	Cp	59	AT1G03160	thylakoid-integral; envelope-inner-integral	plastid	-
Solyc12g099650.1.1*	Photosystem II 5 kDa protein, chloroplastic (AHRD V1 ***- PST2_GOSHI)	Atlas	Cp	3	Y	Cp	Cp	9	Cp	99.9	AT1G51400	thylakoid-integral	plastid	plastid
Solyc12g099650.1.1*	Photosystem II 5 kDa protein, chloroplastic (AHRD V1 ***- PST2_GOSHI)	Atlas	Cp	3	Y	Cp	Cp	9	Cp	99.9	AT3G21055	thylakoid-integral	plastid	-
Solyc12g062420.1.1	Ribulose bisphosphate carboxylase large chain (Fragment) (AHRD V1 ***- B8QEU7_9VIRI); contains Interpro domain(s) IPR000685 Ribulose bisphosphate	-	-	-	-	-	-	-	-	-	AT2G07732*	-	M, plastid	-
Solyc12g044400.1.1*	Cell division protease ftsH homolog 4 (AHRD V *-*- FTSH4_SYNY3); contains Interpro domain(s) IPR003959 ATPase, AAA-type, core	Atlas	Cp	2	-	Cp	Cp	13	C	99.5	AT1G50250*	thylakoid-integral	plastid	plastid
Solyc12g062290.1.1	Serine protease (AHRD V1 **** D8UJN6_VOLCA); contains Interpro domain(s) IPR015724 Serine endopeptidase DegP2	-	-	-	-	-	-	-	-	-	AT5G40200*	-	N, plastid	plastid
Solyc12g044280.1.1*	Photosystem I reaction center subunit VI, chloroplastic (AHRD V ***- PSAH_SPIOL); contains Interpro domain(s) IPR004928 Photosystem I reaction centre subunit VI	Atlas	Cp	2	Y	Cp	Cp	14	Cp	100	AT1G52230*	thylakoid-integral	plastid	plastid
Solyc12g044280.1.1*	Photosystem I reaction center subunit VI, chloroplastic (AHRD V ***- PSAH_SPIOL); contains Interpro domain(s) IPR004928 Photosystem I reaction centre subunit VI	Atlas	Cp	2	Y	Cp	Cp	14	Cp	100	AT3G16140*	thylakoid-integral	plastid	plastid
Solyc12g036170.1.1	Unknown Protein (AHRD V)	Atlas	Cp	1	Y	possibly Cp	Cp	8	Cp	40.9	AT1G18730	thylakoid-integral	plastid	plastid
Solyc12g021280.1.1	Protein kinase (AHRD V ***- Q84V7_CHLRE); contains Interpro domain(s) IPR002290 Serine/threonine protein kinase	Atlas	-	5	Y	possibly Cp	Cp	10	G	84.1	AT1G68830*	thylakoid-integral	plastid	-
Solyc12g011450.1.1*	Chlorophyll a-b binding protein 3, chloroplastic (AHRD V ***- CB23_SOLLC); contains Interpro domain(s) IPR00344 Chlorophyll A-B binding protein	Atlas	Cp	3	Y	Cp	Cp	14	Cp	100	AT2G05100*	thylakoid-integral	plastid	plastid
Solyc12g057120.1.1	Subunit VIb of cytochrome c oxidase (AHRD V1 *-*- C4R7U6_PICPG); contains Interpro domain(s) IPR003213 Cytochrome c oxidase, subunit VIb	-	-	-	-	-	-	-	-	-	AT1G22450*	-	M, plastid	plastid
Solyc12g057110.2.1	14-3-3 (Fragment) (AHRD V1 ***- D3TIB7_MANIN); contains Interpro domain(s) IPR000308 14-3-3 protein	-	-	-	-	-	-	-	-	-	AT1G35160*	-	C, plastid	-
Solyc12g011450.1.1*	Chlorophyll a-b binding protein 3, chloroplastic (AHRD V ***- CB23_SOLLC); contains Interpro domain(s) IPR00344 Chlorophyll A-B binding protein	Atlas	Cp	3	Y	Cp	Cp	14	Cp	100	AT5G54270*	thylakoid-integral	plastid	plastid
Solyc12g011280.1.1*	Chlorophyll a-b binding protein 8, chloroplastic (AHRD V ***- CB3_SOLLC); contains Interpro domain(s) IPR00344 Chlorophyll A-B binding protein	Atlas	Cp	2	Y	Cp	Cp	14	Cp	100	AT1G45474*	thylakoid-integral	plastid	plastid
Solyc12g011280.1.1*	Chlorophyll a-b binding protein 8, chloroplastic (AHRD V ***- CB3_SOLLC); contains Interpro domain(s) IPR00344 Chlorophyll A-B binding protein	Atlas	Cp	2	Y	Cp	Cp	14	Cp	100	AT1G61520*	thylakoid-integral	plastid	plastid
Solyc12g009200.1.1*	Chlorophyll a-b binding protein, chloroplastic (AHRD V ***- CB2_PETHY); contains Interpro domain(s) IPR00344 Chlorophyll A-B binding protein	Atlas	Cp	2	Y	Cp	Cp	11	Cp	100	AT1G19150*	thylakoid-integral	plastid	-
Solyc12g009200.1.1*	Chlorophyll a-b binding protein, chloroplastic (AHRD V ***- CB2_PETHY); contains Interpro domain(s) IPR00344 Chlorophyll A-B binding protein	Atlas	Cp	2	Y	Cp	Cp	11	Cp	100	AT3G61470*	thylakoid-integral	plastid	plastid
Solyc12g056940.1.1*	Acetyl-CoA carboxylase (AHRD V1 ***- D2CFN2_9ROSI); contains Interpro domain(s) IPR013537 Acetyl-CoA carboxylase, central region	-	-	-	-	-	-	-	-	-	AT1G36160	-	C, plastid	-
Solyc12g056940.1.1*	Acetyl-CoA carboxylase (AHRD V1 ***- D2CFN2_9ROSI); contains Interpro domain(s) IPR013537 Acetyl-CoA carboxylase, central region	-	-	-	-	-	-	-	-	-	AT1G36180*	plastid	-	-
Solyc12g006140.1.1*	Chlorophyll a-b binding protein 37, chloroplastic (AHRD V ***- CB26_PETSP); contains Interpro domain(s) IPR00344 Chlorophyll A-B binding protein	Atlas	Cp	3	Y	Cp	Cp	5	Cp	100	AT2G05100*	thylakoid-integral	plastid	plastid
Solyc12g006140.1.1*	Chlorophyll a-b binding protein 37, chloroplastic (AHRD V ***- CB26_PETSP); contains Interpro domain(s) IPR00344 Chlorophyll A-B binding protein	Atlas	Cp	3	Y	Cp	Cp	5	Cp	100	AT3G27690*	thylakoid-integral	plastid	plastid
Solyc11g066110.1.1*	Inner membrane protein oxaA (AHRD V *-*- B9L0L4_THERP); contains Interpro domain(s) IPR00708 Membrane insertion protein, OxaA/YidC	Atlas	Cp	3	Y	Cp	Cp	13	M	67.2	AT1G24490*	thylakoid-integral	plastid	-
Solyc11g066110.1.1*	Inner membrane protein oxaA (AHRD V *-*- B9L0L4_THERP); contains Interpro domain(s) IPR00708 Membrane insertion protein, OxaA/YidC	Atlas	Cp	3	Y	Cp	Cp	13	M	67.2	AT2G28800*	thylakoid-integral	plastid	plastid
Solyc12g056780.1.1	Prostaglandin E synthase 3 (AHRD V1 **-- B4FLE3_MAIZE); contains Interpro domain(s) IPR017447 CS	-	-	-	-	-	-	-	-	-	AT4G02450*	-	C, plastid	-
Solyc11g044260.1.1*	Glutathione-regulated potassium-efflux system protein (AHRD V *-*- Q73FS4_WOLPM); contains Interpro domain(s) IPR00653 Cation/H+ exchanger	Atlas	Cp	5	Y	Cp	Cp	10	Cp	53.7	AT4G04850*	thylakoid-integral	plastid	-
Solyc11g018550.2.1	Thylakoid-bound ascorbate peroxidase 6	Atlas	Cp	1	Y	Cp	Cp	12	Cp	63.2	AT1G77490	thylakoid-integral	plastid	plastid
Solyc11g017200.1.1	TPR repeat (AHRD V *--- Q3NR5_SYNE7); contains Interpro domain(s) IPR0990 Tetratricopeptide-like helical	Atlas	Cp	5	Y	possibly M	Cp	13	Cp	99.6	AT1G22700	thylakoid-integral	plastid	plastid
Solyc11g011990.1.1	Plastid terminal oxydase	Atlas	Cp	1	Y	Cp	Cp	13	Cp	65.9	AT4G22260	thylakoid-integral	-	-
Solyc10g086570.2.1	Palmitoyltransferase PFA4 (AHRD V **-- B6TA04_MAIZE); contains Interpro domain(s) IPR00594 Zinc finger, DHHC-type	Atlas	Cp	3	Y	Cp	Cp	11	Cp	96.5	AT5G02160	thylakoid-integral	plastid	plastid
Solyc10g085980.1.1	Integral membrane protein TerC (AHRD V ***- A9B4B_HERA2); contains Interpro domain(s) IPR005496 Integral membrane protein TerC	Atlas	Cp	2	Y	possibly Cp	Cp	8	Cp	97.6	AT5G12130	thylakoid-integral	plastid	-
Solyc10g085680.1.1*	Protein kinase (AHRD V ***- Q84V7_CHLRE); contains Interpro domain(s) IPR002290 Serine/threonine protein kinase	Atlas	Cp	2	Y	Cp	Cp	10	Cp	46.3	AT1G68830*	thylakoid-integral	plastid	-
Solyc10g085680.1.1*	Protein kinase (AHRD V ***- Q84V7_CHLRE); contains Interpro domain(s) IPR002290 Serine/threonine protein kinase	Atlas	Cp	2	Y	Cp	Cp	10	Cp	46.3	AT5G01920	thylakoid-integral	plastid	-
Solyc10g081470.1.1*	Peptidase M50 family protein (AHRD V ***- CFJH6_9CHLO); contains Interpro domain(s) IPR00895 Peptidase M50	Atlas	Cp	2	Y	Cp	Cp	3	PM	99.5	AT5G35220*	thylakoid-integral	plastid	-
Solyc10g077120.1.1	Photosystem II core complex proteins psbY (AHRD V *-*- B6SR26_MAIZE)	Atlas	Cp	2	Y	-	Cp	3	Cp	99.8	AT1G67740	thylakoid-integral	plastid	plastid
Solyc10g011770.2.1	Threonine endopeptidase (AHRD V **-- B6TCN7_MAIZE)	Atlas	Cp	2	Y	Cp	Cp	14	Cp	99.9	AT4G01150*	thylakoid-integral	plastid	plastid
Solyc10g007690.2.1*	Chlorophyll a-b binding protein 8, chloroplastic (AHRD V ***- CB3_SOLLC); contains Interpro domain(s) IPR00344 Chlorophyll A-B binding protein	Atlas	Cp	1	Y	Cp	Cp	10	Cp	100	AT1G45474*	thylakoid-integral	plastid	plastid
Solyc10g007690.2.1*	Chlorophyll a-b binding protein 8, chloroplastic (AHRD V ***- CB3_SOLLC); contains Interpro domain(s) IPR00344 Chlorophyll A-B binding protein	Atlas	Cp	1	Y	Cp	Cp	10	Cp	100	AT1G61520*	thylakoid-integral	plastid	plastid
Solyc10g006230.2.1*	Chlorophyll a-b binding protein 7, chloroplastic (AHRD V ***- CB2_SOLLC); contains Interpro domain(s) IPR00344 Chlorophyll A-B binding protein	Atlas	Cp	1	Y	Cp	Cp	13	Cp	100	AT1G19150*	thylakoid-integral	plastid	-
Solyc10g006230.2.1*	Chlorophyll a-b binding protein 7, chloroplastic (AHRD V ***- CB2_SOLLC); contains Interpro domain(s) IPR00344 Chlorophyll A-B binding protein	Atlas	Cp	1	Y	Cp	Cp	13	Cp	100	AT3G61470*	thylakoid-integral	plastid	plastid
Solyc09g091240.2.1*	Predicted membrane protein (Fragment) (AHRD V **-- B9GMI0_POPTR); contains Interpro domain(s) IPR00727 Uncharacterised protein family UPF006	Atlas	Cp	1	Y	Cp	Cp	11	Cp	70.7	AT1G64150*	thylakoid-integral	-	-
Solyc09g083190.2.1	Genomic DNA chromosome 5 P clone MQD9 (AHRD V ***- Q9FG89_ARATH)	Atlas	Cp	3	Y	possibly Cp	Cp	6	PM	90.8	AT5G43750	thylakoid-integral	plastid	plastid
Solyc09g082700.2.1*	Early light-induced protein 7 (AHRD V ***- B2BJD6_RHOCT)	Atlas	Cp	1	Y	Cp	Cp	12	Cp	100	AT3G22840*	thylakoid-integral	-	-
Solyc09g082700.2.1*	Early light-induced protein 7 (AHRD V ***- B2BJD6_RHOCT)	Atlas	Cp	1	Y	Cp	Cp	12	Cp	100	AT4G14690*	thylakoid-integral	-	-
Solyc09g082690.2.1*	Early light-induced protein 7 (AHRD V ***- B2BJD6_RHOCT)	Atlas	Cp	2	Y	possibly Cp	Cp	12	Cp	100	AT3G22840*	thylakoid-integral	-	-
Solyc09g082690.2.1*	Early light-induced protein 7 (AHRD V ***- B2BJD6_RHOCT)	Atlas	Cp	2	Y	possibly Cp	Cp	12	Cp	100	AT4G14690*	thylakoid-integral	-	-
Solyc09g074880.2.1*	Homology to unknown gene (AHRD V ***- Q00YR0_OSTTA); contains Interpro domain(s) IPR0305 Tetratricopeptide TPR2	Atlas	Cp	1	Y	Cp	Cp	10	C	47.4	AT1G02910*	thylakoid-integral	plastid	-
Solyc09g065910.1.1	Photosystem II reaction center W protein (AHRD V ***- B6TMB3_MAIZE); contains Interpro domain(s) IPR009806 Photosystem II protein PsbW, class 2	Atlas	S	5	-	possibly Cp	Cp	4	PM	65.7	AT2G30570*	thylakoid-integral	plastid	plastid
Solyc09g065120.2.1*	Preprotein translocase secY subunit (AHRD V ***- B6U7Q0_MAIZE); contains Interpro domain(s) IPR002208 SecY protein	Atlas	-	4	-	Cp	Cp	15	C	78	AT2G18710*	thylakoid-integral	plastid	-
Solyc09g063140.2.1*	Os06g0235500 protein (Fragment) (AHRD V *-*- Q0DDB7_ORYSJ)	Atlas	-	4	Y	Cp	Cp	9	Cp	98.6	AT1G02910*	thylakoid-integral	plastid	-
Solyc09g014520.2.1*	Chlorophyll a-b binding protein 6A, chloroplastic (AHRD V **** CB_SOLLC); contains Interpro domain(s) IPR00344 Chlorophyll A-B binding protein	Atlas	Cp	4	-	Cp	Cp	7	Cp	100	AT3G08940	thylakoid-integral	plastid	plastid
Solyc12g056220.1.1	Aquaporin (AHRD V1 ***- Q8W507_TOBAC); contains Interpro domain(s) IPR012269 Aquaporin	-	-	-	-	-	-	-	-	-	AT2G45960*	-	PM, plastid	-
Solyc09g014520.2.1*	Chlorophyll a-b binding protein 6A, chloroplastic (AHRD V **** CB_SOLLC); contains Interpro domain(s) IPR00344 Chlorophyll A-B binding protein	Atlas	Cp	4	-	Cp	Cp	7	Cp	100	AT5G01530	thylakoid-integral	plastid	plastid
Solyc12g056120.1.1*	6-phosphogluconate dehydrogenase decarboxylating (AHRD V1 ***- Q9FFR3_ARATH); contains Interpro domain(s) IPR006113 6-phosphogluconate dehydrogenase, decarboxylating	-	-	-	-	-	-	-	-	-	AT1G64190	stroma	Cp	-
Solyc12g056120.1.1*	6-phosphogluconate dehydrogenase decarboxylating (AHRD V1 ***- Q9FFR3_ARATH); contains Interpro domain(s) IPR006113 6-phosphogluconate dehydrogenase, decarboxylating	-	-	-	-	-	-	-	-	-	AT5G41670	-	M, plastid	-
Solyc12g056110.1.1	V-type proton ATPase subunit E (AHRD V1 ***- D3PGM0_9MAXI); contains Interpro domain(s) IPR002842 ATPase, V1/A1 complex, subunit E	-	-	-	-	-	-	-	-	-	AT4G11150*	-	G,V, plastid	-
Solyc09g011010.2.1	One helix protein (AHRD V ***- Q84N30_IPONI)	Atlas	Cp	3	Y	Cp	Cp	10	Cp	100	AT5G02120	thylakoid-integral	plastid	plastid
Solyc12g056060.1.1*	Genomic DNA chromosome 5 TAC clone K16L22 (AHRD V1 *-*- Q9FJ36_ARATH)	-	-	-	-	-	-	-	-	-	AT1G64330*	-	V, plastid	-
Solyc12g056060.1.1*	Genomic DNA chromosome 5 TAC clone K16L22 (AHRD V1 *-*- Q9FJ36_ARATH)	-	-	-	-	-	-	-	-	-	AT5G41790*	-	C, plastid	plastid
Solyc08g081770.2.1*	Predicted membrane protein (Fragment) (AHRD V *--- B9GMI0_POPTR); contains Interpro domain(s) IPR00727 Uncharacterised protein family UPF006	Atlas	Cp	2	Y	Cp	Cp	13	Cp	98.4	AT1G64150*	thylakoid-integral	-	-
Solyc12g055940.1.1	Unknown Protein (AHRD V1)	-	-	-	-	-	-	-	-	-	AT1G64430	-	Cp	-
Solyc12g055890.1.1	2-oxoisovalerate dehydrogenase alpha subunit (AHRD V1 ***- C5JHU4_AJEDS); contains Interpro domain(s) IPR001017 Dehydrogenase, E1 component	-	-	-	-	-	-	-	-	-	AT1G21400*	-	M, plastid	-
Solyc12g055880.1.1	2-oxoisovalerate dehydrogenase subunit alpha (AHRD V1 ***- C1G8C8_PARBD); contains Interpro domain(s) IPR001017 Dehydrogenase, E1 component	-	-	-	-	-	-	-	-	-	AT1G21400*	-	M, plastid	-
Solyc12g055870.1.1	RAG1-activating protein 1 homolog (AHRD V1 **-- R1AP1_DICDI); contains Interpro domain(s) IPR018179 RAG1-activating protein 1 homologue	-	-	-	-	-	-	-	-	-	AT1G66770*	-	ER, plastid	plastid
Solyc12g055800.1.1*	V-type ATP synthase alpha chain (AHRD V1 ***- VATA_METTH); contains Interpro domain(s) IPR005725 ATPase, V1 complex, subunit A	-	-	-	-	-	-	-	-	-	AT1G78900	-	G,V, plastid	plastid
Solyc12g055800.1.1*	V-type ATP synthase alpha chain (AHRD V1 ***- VATA_METTH); contains Interpro domain(s) IPR005725 ATPase, V1 complex, subunit A	-	-	-	-	-	-	-	-	-	AT5G08670*	-	M, plastid	plastid
Solyc08g080050.2.1*	PGR5-like protein A, chloroplastic (AHRD V ***- PGLA_ARATH)	Atlas	Cp	2	Y	Cp	Cp	13	Cp	91.6	AT4G11960*	thylakoid-integral	plastid	plastid
Solyc08g080050.2.1*	PGR5-like protein A, chloroplastic (AHRD V ***- PGLA_ARATH)	Atlas	Cp	2	Y	Cp	Cp	13	Cp	91.6	AT4G22890	thylakoid-integral	plastid	plastid
Solyc08g077880.2.1	Light harvesting-like protein 3 (AHRD V **-- B9N2V9_POPTR)	Atlas	Cp	2	Y	Cp	Cp	2	Cp	97	AT5G47110	thylakoid-integral	plastid	plastid
Solyc08g067330.1.1*	Chlorophyll a-b binding protein 3C-like (AHRD V ***- Q2XTE0_SOLTU); contains Interpro domain(s) IPR00344 Chlorophyll A-B binding protein	Atlas	-	5	-	-	Cp	7	Cp	100	AT1G29910*	thylakoid-integral	plastid	plastid
Solyc08g067330.1.1*	Chlorophyll a-b binding protein 3C-like (AHRD V ***- Q2XTE0_SOLTU); contains Interpro domain(s) IPR00344 Chlorophyll A-B binding protein	Atlas	-	5	-	-	Cp	7	Cp	100	AT1G29920	thylakoid-integral	plastid	plastid
Solyc08g061610.2.1	Copper-exporting P-type ATPase A (AHRD V **** COPA_STAES); contains Interpro domain(s) IPR006403 ATPase, P type, cation/copper-transporter	Atlas	Cp	2	Y	possibly Cp	Cp	2	C	91.3	AT5G21930*	thylakoid-integral	plastid	-
Solyc12g049590.1.1	Phosphatidylinositol-4-phosphate 5-kinase family protein (AHRD V1 **-- D7L328_ARALY); contains Interpro domain(s) IPR016034 Phosphatidylinositol-4-phosphate 5-kinase, core, subgroup	-	-	-	-	-	-	-	-	-	AT3G14270*	-	V, plastid	-
Solyc08g007770.2.1	PGR5-like protein A, chloroplastic (AHRD V ***- PGLA_ARATH)	Atlas	Cp	4	Y	Cp	Cp	13	M	46.4	AT4G11960*	thylakoid-integral	plastid	plastid
Solyc08g007180.2.1	Light harvesting-like protein 3 (AHRD V **-- A9P99_POPTR)	Atlas	Cp	2	Y	Cp	Cp	6	Cp	86.8	AT4G17600	thylakoid-integral	plastid	plastid
Solyc08g006930.2.1	Photosystem I reaction center subunit X psaK (AHRD V ***- Q84QE6_TOBAC); contains Interpro domain(s) IPR07493 Photosystem I reaction center, PsaK, plant	Atlas	Cp	3	Y	Cp	Cp	14	Cp	100	AT1G30380	thylakoid-integral	plastid	plastid
Solyc07g066310.2.1	photosystem II polypeptide (AHRD V ***- Q6V7X5_TRIPR); contains Interpro domain(s) IPR00684 Photosystem II protein PsbR	Atlas	Cp	2	Y	Cp	Cp	13	Cp	100	AT1G79040	thylakoid-integral	plastid	plastid
Solyc12g049430.1.1	Peptidyl-prolyl cis-trans isomerase-like protein (AHRD V1 ***- D0NAF5_PHYIN); contains Interpro domain(s) IPR002130 Peptidyl-prolyl cis-trans isomerase, cyclophilin-type	-	-	-	-	-	-	-	-	-	AT1G53720*	-	N, plastid	-
Solyc07g066210.2.1	H(+)/Cl(-) exchange transporter ClcA (AHRD V *-*- D0Z037_LISDA); contains Interpro domain(s) IPR00807 Chloride channel, voltage gated IPR000644 Cystathionine beta-synthase, core	Atlas	Cp	4	-	-	Cp	5	P	46	AT4G35440*	thylakoid-integral	plastid	-
Solyc12g049330.1.1*	Zinc finger family protein (AHRD V1 ***- D7KLF2_ARALY)	-	-	-	-	-	-	-	-	-	AT1G54150	envelope-outer	M, plastid	-
Solyc12g049330.1.1*	Zinc finger family protein (AHRD V1 ***- D7KLF2_ARALY)	-	-	-	-	-	-	-	-	-	AT1G59560*	envelope-outer	Cp	-
Solyc12g049320.1.1	GRAS family transcription factor (AHRD V1 **-- Q4VYC3_POPTR); contains Interpro domain(s) IPR005202 GRAS transcription factor	-	-	-	-	-	-	-	-	-	AT3G13840*	-	N, plastid	-
Solyc07g066150.1.1	Photosystem I reaction center subunit V (AHRD V ***- B6U534_MAIZE); contains Interpro domain(s) IPR07494 Photosystem I reaction center, PsaG, plant	Atlas	Cp	1	Y	Cp	Cp	12	Cp	100	AT1G55670	thylakoid-integral	plastid	plastid
Solyc12g049120.1.1	ABC transporter B family member 15 (AHRD V1 ***- AB15B_ARATH); contains Interpro domain(s) IPR001140 ABC transporter, transmembrane region	-	-	-	-	-	-	-	-	-	AT3G28345*	-	V, plastid	-
Solyc07g063600.2.1*	Chlorophyll a-b binding protein 3, chloroplastic (AHRD V ***- CB23_SOLLC); contains Interpro domain(s) IPR00344 Chlorophyll A-B binding protein	Atlas	M	5	Y	Cp	Cp	14	Cp	100	AT2G05100*	thylakoid-integral	plastid	plastid
Solyc07g063600.2.1*	Chlorophyll a-b binding protein 3, chloroplastic (AHRD V ***- CB23_SOLLC); contains Interpro domain(s) IPR00344 Chlorophyll A-B binding protein	Atlas	M	5	Y	Cp	Cp	14	Cp	100	AT5G54270*	thylakoid-integral	plastid	plastid
Solyc07g063570.2.1	Cytochrome c biogenesis protein family (AHRD V ***- D7MU78_ARALY); contains Interpro domain(s) IPR003834 Cytochrome c assembly protein, transmembrane region	Atlas	Cp	2	Y	Cp	Cp	14	Cp	99.5	AT5G54290	thylakoid-integral	plastid	-
Solyc07g055320.2.1*	ATP-dependent Zn protease cell division protein FtsH homolog (AHRD V **** B2XTF7_HETA2); contains Interpro domain(s) IPR005936 Peptidase M4, FtsH	Atlas	Cp	5	Y	possibly Cp	Cp	13	C	100	AT1G06430*	thylakoid-integral	plastid	plastid
Solyc07g055320.2.1*	ATP-dependent Zn protease cell division protein FtsH homolog (AHRD V **** B2XTF7_HETA2); contains Interpro domain(s) IPR005936 Peptidase M4, FtsH	Atlas	Cp	5	Y	possibly Cp	Cp	13	C	100	AT2G30950	thylakoid-integral	plastid	plastid
Solyc07g047850.2.1*	Chlorophyll a-b binding protein 4, chloroplastic (AHRD V **** CB24_SOLLC); contains Interpro domain(s) IPR00344 Chlorophyll A-B binding protein	Atlas	Cp	4	-	Cp	Cp	2	Cp	100	AT2G05070	thylakoid-integral	plastid	plastid
Solyc07g047850.2.1*	Chlorophyll a-b binding protein 4, chloroplastic (AHRD V **** CB24_SOLLC); contains Interpro domain(s) IPR00344 Chlorophyll A-B binding protein	Atlas	Cp	4	-	Cp	Cp	2	Cp	100	AT2G05100*	thylakoid-integral	plastid	plastid
Solyc07g047850.2.1*	Chlorophyll a-b binding protein 4, chloroplastic (AHRD V **** CB24_SOLLC); contains Interpro domain(s) IPR00344 Chlorophyll A-B binding protein	Atlas	Cp	4	-	Cp	Cp	2	Cp	100	AT3G27690*	thylakoid-integral	plastid	plastid
Solyc07g022900.2.1*	Chlorophyll a-b binding protein 4, chloroplastic (AHRD V **** CA4_ARATH); contains Interpro domain(s) IPR00344 Chlorophyll A-B binding protein	Atlas	Cp	3	Y	Cp	Cp	9	Cp	100	AT1G45474*	thylakoid-integral	plastid	plastid
Solyc07g022900.2.1*	Chlorophyll a-b binding protein 4, chloroplastic (AHRD V **** CA4_ARATH); contains Interpro domain(s) IPR00344 Chlorophyll A-B binding protein	Atlas	Cp	3	Y	Cp	Cp	9	Cp	100	AT3G47470*	thylakoid-integral	plastid	plastid
Solyc07g009000.1.1	Photosystem II CP43 chlorophyll apoprotein (AHRD V ***- C8XU03_COILA); contains Interpro domain(s) IPR000932 Photosystem antenna protein-like	Atlas	-	4	-	-	Cp	4	Cp	94.7	ATCG00280*	thylakoid-integral	plastid	-
Solyc07g006520.2.1*	Preprotein translocase secY subunit (AHRD V ***- A8IS4_CHLRE); contains Interpro domain(s) IPR002208 SecY protein	Atlas	Cp	2	Y	possibly Cp	Cp	10	Cp	76.8	AT2G18710*	thylakoid-integral	plastid	-
Solyc06g084050.2.1	Photosystem II reaction center W protein (AHRD V ***- B6TMB3_MAIZE); contains Interpro domain(s) IPR009806 Photosystem II protein PsbW, class 2	Atlas	Cp	2	Y	Cp	Cp	10	Cp	100	AT2G30570*	thylakoid-integral	plastid	plastid
Solyc12g044540.1.1	HAT family dimerisation domain containing protein expressed (AHRD V1 **-- Q6AVI0_ORYSJ)	-	-	-	-	-	-	-	-	-	AT5G66720*	plastid stroma	plastid	-
Solyc06g082970.2.1	DnaJ domain family (AHRD V ***- Q84VQ4_ARATH); contains Interpro domain(s) IPR00623 Heat shock protein DnaJ, N-terminal	Atlas	Cp	5	Y	possibly Cp	Cp	11	C	72.8	AT5G21430	thylakoid-integral	plastid	plastid
Solyc06g082950.2.1	Photosystem I reaction center subunit XI (AHRD V ***- B6SHL_MAIZE); contains Interpro domain(s) IPR003757 Photosystem I reaction centre, subunit XI PsaL	Atlas	Cp	2	Y	Cp	Cp	12	Cp	100	AT4G12800*	thylakoid-integral	plastid	plastid
Solyc06g082940.2.1	Photosystem I reaction center subunit XI (AHRD V ***- B6SHL_MAIZE); contains Interpro domain(s) IPR003757 Photosystem I reaction centre, subunit XI PsaL	Atlas	Cp	2	Y	Cp	Cp	12	Cp	100	AT4G12800*	thylakoid-integral	plastid	plastid
Solyc12g044340.1.1	Coiled-coil domain-containing protein 111 (AHRD V1 ***- CC111_MOUSE); contains Interpro domain(s) IPR004340 DNA primase, UL52/UL70 type, Herpesviridae	-	-	-	-	-	-	-	-	-	AT5G52800	-	N, plastid	-
Solyc06g076250.2.1	Genomic DNA chromosome 5 BAC clone F2O5 (AHRD V **-- Q9LTI9_ARATH)	Atlas	Cp	4	Y	-	Cp	3	Cp	94.3	AT4G11960*	thylakoid-integral	plastid	plastid
Solyc06g074200.2.1	Sex-linked protein 9 (Fragment) (AHRD V ***- D7RW_SILCU); contains Interpro domain(s) IPR07498 Photosystem I PsaO	Atlas	Cp	1	Y	Cp	Cp	13	Cp	100	AT1G08380	thylakoid-integral	plastid	-
Solyc06g069730.2.1*	Chlorophyll a-b binding protein 4, chloroplastic (AHRD V ***- CA4_ARATH); contains Interpro domain(s) IPR00344 Chlorophyll A-B binding protein	Atlas	Cp	2	Y	Cp	Cp	14	Cp	100	AT3G47470*	thylakoid-integral	plastid	plastid
Solyc12g044300.1.1	Acyl-CoA synthetase (AMP-forming)/AMP-acid ligase II (AHRD V1 **** C7MWS2_SACVD); contains Interpro domain(s) IPR000873 AMP-dependent synthetase and ligase	-	-	-	-	-	-	-	-	-	AT3G48990*	-	P, plastid	-
Solyc12g044290.1.1	Acetyl-coenzyme A synthetase (AHRD V1 *-*- ACSA_XANP2); contains Interpro domain(s) IPR000873 AMP-dependent synthetase and ligase	-	-	-	-	-	-	-	-	-	AT3G48990*	-	P, plastid	-
Solyc06g069730.2.1*	Chlorophyll a-b binding protein 4, chloroplastic (AHRD V ***- CA4_ARATH); contains Interpro domain(s) IPR00344 Chlorophyll A-B binding protein	Atlas	Cp	2	Y	Cp	Cp	14	Cp	100	AT3G61470*	thylakoid-integral	plastid	plastid
Solyc06g066640.2.1*	Photosystem I reaction center subunit VI-, chloroplastic (AHRD V ***- PSAH_ARATH); contains Interpro domain(s) IPR004928 Photosystem I reaction centre subunit VI	Atlas	Cp	3	Y	Cp	Cp	13	Cp	100	AT1G52230*	thylakoid-integral	plastid	plastid
Solyc06g066640.2.1*	Photosystem I reaction center subunit VI-, chloroplastic (AHRD V ***- PSAH_ARATH); contains Interpro domain(s) IPR004928 Photosystem I reaction centre subunit VI	Atlas	Cp	3	Y	Cp	Cp	13	Cp	100	AT3G16140*	thylakoid-integral	plastid	plastid
Solyc12g043150.1.1	IST1-like protein (AHRD V1 *-*- D3BU39_POLPA); contains Interpro domain(s) IPR005061 Protein of unknown function DUF292, eukaryotic	-	-	-	-	-	-	-	-	-	AT1G52315*	-	M, plastid	-
Solyc12g043070.1.1	SNF2 domain-containing protein (AHRD V1 ***- D7LFU4_ARALY)	-	-	-	-	-	-	-	-	-	AT2G40770*	-	N, plastid	-
Solyc06g066000.1.1	ATP synthase subunit b&apos (AHRD V ***- D8G4T7_9CYAN); contains Interpro domain(s) IPR00246 ATPase, F0 complex, subunit B/B', bacterial and chloroplast	Atlas	Cp	1	Y	Cp	Cp	12	Cp	99.9	AT4G32260*	thylakoid-integral	plastid	plastid
Solyc06g065990.1.1	ATP synthase subunit b&apos (AHRD V ***- D8G4T7_9CYAN); contains Interpro domain(s) IPR00246 ATPase, F0 complex, subunit B/B', bacterial and chloroplast	Atlas	Cp	1	Y	Cp	Cp	7	Cp	99.9	AT4G32260*	thylakoid-integral	plastid	plastid
Solyc06g063370.2.1	Chlorophyll a-b binding protein A, chloroplastic (AHRD V ***- CB2A_PYRPY); contains Interpro domain(s) IPR00344 Chlorophyll A-B binding protein	Atlas	Cp	3	Y	Cp	Cp	10	Cp	100	AT4G10340	thylakoid-integral	plastid	plastid
Solyc12g042960.1.1	Unknown Protein (AHRD V1)	-	-	-	-	-	-	-	-	-	AT4G21700*	-	plastid	plastid
Solyc06g060340.2.1	Chloroplast photosystem II-associated protein (AHRD V ***- A8HPM2_CHLRE); contains Interpro domain(s) IPR00344 Chlorophyll A-B binding protein	Atlas	Cp	2	Y	Cp	not Cp	0	Cp	100	AT1G44575	thylakoid-integral	plastid	plastid
Solyc06g019200.2.1*	Peptidase M50 family protein (AHRD V ***- D7LZ04_ARALY); contains Interpro domain(s) IPR00895 Peptidase M50	Atlas	Cp	3	-	-	Cp	14	PM	100	AT5G35220*	thylakoid-integral	plastid	-
Solyc12g042910.1.1	Cryptochrome-like protein 1 (AHRD V1 ***- Q5IFN1_OSTTA); contains Interpro domain(s) IPR005101 DNA photolyase, FAD-binding/Cryptochrome, C-terminal	-	-	-	-	-	-	-	-	-	AT5G24850*	plastid nucleoid	M, plastid	-
Solyc05g056070.2.1*	Chlorophyll a-b binding protein 6A, chloroplastic (AHRD V ***- CB_SOLLC); contains Interpro domain(s) IPR00344 Chlorophyll A-B binding protein	Atlas	Cp	2	Y	Cp	Cp	10	Cp	100	AT2G40100*	thylakoid-integral	plastid	plastid
Solyc05g056070.2.1*	Chlorophyll a-b binding protein 6A, chloroplastic (AHRD V ***- CB_SOLLC); contains Interpro domain(s) IPR00344 Chlorophyll A-B binding protein	Atlas	Cp	2	Y	Cp	Cp	10	Cp	100	AT3G54890*	thylakoid-integral	plastid	plastid
Solyc05g056050.2.1*	Chlorophyll a-b binding protein 6A, chloroplastic (AHRD V ***- CB_SOLLC); contains Interpro domain(s) IPR00344 Chlorophyll A-B binding protein	Atlas	Cp	2	Y	Cp	Cp	7	Cp	100	AT2G40100*	thylakoid-integral	plastid	plastid
Solyc12g042830.1.1	class I heat shock protein (AHRD V1 -**- Q69BI7_CARPA); contains Interpro domain(s) IPR008978 HSP20-like chaperone	-	-	-	-	-	-	-	-	-	AT4G27670*	plastid stroma	-	-
Solyc05g056050.2.1*	Chlorophyll a-b binding protein 6A, chloroplastic (AHRD V ***- CB_SOLLC); contains Interpro domain(s) IPR00344 Chlorophyll A-B binding protein	Atlas	Cp	2	Y	Cp	Cp	7	Cp	100	AT3G54890*	thylakoid-integral	plastid	plastid
Solyc05g026550.2.1	NAD(P)H-quinone oxidoreductase subunit L (AHRD V *-*- Q05RD4_9SYNE); contains Interpro domain(s) IPR09654 NADH dehydrogenase, transmembrane subunit NdhL	Atlas	-	5	-	possibly Cp	not Cp	0	PM	99.9	AT1G70760	thylakoid-integral	plastid	-
Solyc05g025600.1.1	Chloroplast photosystem II subunit X (Fragment) (AHRD V ***- BPPX5_9MYRT); contains Interpro domain(s) IPR00958 Photosystem II protein PsbX	Atlas	M	5	Y	-	Cp	9	M	79.5	AT2G06520	thylakoid-integral	plastid	plastid
Solyc05g014050.2.1*	Inner membrane protein oxaA (AHRD V *-*- B9L0L4_THERP); contains Interpro domain(s) IPR00708 Membrane insertion protein, OxaA/YidC	Atlas	Cp	2	Y	Cp	Cp	12	M	70.3	AT1G24490*	thylakoid-integral	plastid	-
Solyc12g042740.1.1	Signal recognition particle protein 3 (AHRD V1 ***- D7KD74_ARALY); contains Interpro domain(s) IPR000897 Signal recognition particle, SRP54 subun	-	-	-	-	-	-	-	-	-	AT1G48900*	-	C, plastid	-
Solyc05g014050.2.1*	Inner membrane protein oxaA (AHRD V *-*- B9L0L4_THERP); contains Interpro domain(s) IPR00708 Membrane insertion protein, OxaA/YidC	Atlas	Cp	2	Y	Cp	Cp	12	M	70.3	AT2G28800*	thylakoid-integral	plastid	plastid
Solyc12g042590.1.1	WRKY transcription factor (AHRD V1 ***- D8WUJ0_ARTAN); contains Interpro domain(s) IPR003657 DNA-binding WRKY	-	-	-	-	-	-	-	-	-	AT1G80840*	-	N, plastid	-
Solyc12g042580.1.1	Blue copper-like protein (AHRD V1 *-*- B8Y8A0_GOSHI); contains Interpro domain(s) IPR003245 Plastocyanin-like	-	-	-	-	-	-	-	-	-	AT4G12880*	-	EX, plastid	-
Solyc12g042560.1.1*	heat shock protein (AHRD V1 *-*- B2D2G5_CAPSN); contains Interpro domain(s) IPR013126 Heat shock protein 70	-	-	-	-	-	-	-	-	-	AT1G16030*	-	C, plastid	plastid
Solyc12g042560.1.1*	heat shock protein (AHRD V1 *-*- B2D2G5_CAPSN); contains Interpro domain(s) IPR013126 Heat shock protein 71	-	-	-	-	-	-	-	-	-	AT3G12580*	-	C, plastid	-
Solyc05g008530.2.1	Sec-independent protein translocase TatC (AHRD V ***- Q3MG73_ANAVT); contains Interpro domain(s) IPR09822 Twin arginine-targeting protein translocase, TatC	Atlas	Cp	1	Y	Cp	Cp	11	Cp	100	AT2G01110	thylakoid-integral	plastid	-
Solyc12g042480.1.1	Cytochrome P450	-	-	-	-	-	-	-	-	-	AT3G26300*	-	ER, plastid	-
Solyc04g082930.1.1*	Chlorophyll a-b binding protein 36, chloroplastic (AHRD V ***- CB23_TOBAC); contains Interpro domain(s) IPR00344 Chlorophyll A-B binding protein	Atlas	-	5	-	-	Cp	2	Cp	39.2	AT1G76570*	thylakoid-integral	plastid	-
Solyc04g082930.1.1*	Chlorophyll a-b binding protein 36, chloroplastic (AHRD V ***- CB23_TOBAC); contains Interpro domain(s) IPR00344 Chlorophyll A-B binding protein	Atlas	-	5	-	-	Cp	2	Cp	39.2	AT3G27690*	thylakoid-integral	plastid	plastid
Solyc04g082920.2.1*	Chlorophyll a-b binding protein, chloroplastic (AHRD V **** CB2_PHYPA); contains Interpro domain(s) IPR00344 Chlorophyll A-B binding protein	Atlas	-	4	-	Cp	Cp	7	Cp	100	AT1G76570*	thylakoid-integral	plastid	-
Solyc04g082920.2.1*	Chlorophyll a-b binding protein, chloroplastic (AHRD V **** CB2_PHYPA); contains Interpro domain(s) IPR00344 Chlorophyll A-B binding protein	Atlas	-	4	-	Cp	Cp	7	Cp	100	AT3G27690*	thylakoid-integral	plastid	plastid
Solyc04g082250.2.1*	ATP-dependent zinc metalloprotease FTSH, chloroplastic (Fragment) (AHRD V ***- FTSH_CAPAN); contains Interpro domain(s) IPR005936 Peptidase M4, FtsH	Atlas	Cp	2	Y	Cp	Cp	13	Cp	92.6	AT1G50250*	thylakoid-integral	plastid	plastid
Solyc04g082250.2.1*	ATP-dependent zinc metalloprotease FTSH, chloroplastic (Fragment) (AHRD V ***- FTSH_CAPAN); contains Interpro domain(s) IPR005936 Peptidase M4, FtsH	Atlas	Cp	2	Y	Cp	Cp	13	Cp	92.6	AT5G42270	thylakoid-integral	plastid	plastid
Solyc12g042230.1.1	ATP synthase subunit beta chloroplastic (AHRD V1 ***- C0LE81_9ROSI); contains Interpro domain(s) IPR005722 ATPase, F1 complex, beta subunit	-	-	-	-	-	-	-	-	-	AT5G08670*	-	M, plastid	plastid
Solyc12g042200.1.1	U5 small nuclear ribonucleoprotein protein (AHRD V1 *--- C1BSR6_9MAXI); contains Interpro domain(s) IPR017986 WD40 repeat, region	-	-	-	-	-	-	-	-	-	AT5G50970*	-	N, plastid	-
Solyc04g079550.2.1*	Signal peptidase I (AHRD V *-*- B4WT4_9CYAN); contains Interpro domain(s) IPR000223 Peptidase S26A, signal peptidase I	Atlas	Cp	5	Y	Cp	Cp	12	Cp	81.2	AT2G30440	thylakoid-integral	-	-
Solyc04g071930.2.1	One helix protein 2 (AHRD V **-- B9H7V8_POPTR)	Atlas	Cp	1	Y	Cp	Cp	14	Cp	99.5	AT1G34000	thylakoid-integral	plastid	plastid
Solyc04g063360.2.1*	Cell division protease ftsH homolog (AHRD V *--- FTSH_CYACA); contains Interpro domain(s) IPR003959 ATPase, AAA-type, core	Atlas	Cp	2	Y	possibly Cp	Cp	14	C	97.1	AT1G50250*	thylakoid-integral	plastid	plastid
Solyc03g120640.2.1*	Photosystem I reaction center subunit VI-, chloroplastic (AHRD V ***- PSAH_ARATH); contains Interpro domain(s) IPR004928 Photosystem I reaction centre subunit VI	Atlas	Cp	3	Y	Cp	Cp	14	Cp	100	AT1G52230*	thylakoid-integral	plastid	plastid
Solyc03g120640.2.1*	Photosystem I reaction center subunit VI-, chloroplastic (AHRD V ***- PSAH_ARATH); contains Interpro domain(s) IPR004928 Photosystem I reaction centre subunit VI	Atlas	Cp	3	Y	Cp	Cp	14	Cp	100	AT3G16140*	thylakoid-integral	plastid	plastid
Solyc12g041870.1.1*	Glutamine synthetase (AHRD V1 ***- A8WCU7_GOSRA); contains Interpro domain(s) IPR008146 Glutamine synthetase, catalytic region	-	-	-	-	-	-	-	-	-	AT1G66200*	-	C, plastid	plastid
Solyc12g041870.1.1*	Glutamine synthetase (AHRD V1 ***- A8WCU7_GOSRA); contains Interpro domain(s) IPR008146 Glutamine synthetase, catalytic region	-	-	-	-	-	-	-	-	-	AT5G37600*	-	C, plastid	-
Solyc12g040870.1.1*	Nudix hydrolase 4 (AHRD V1 ***- B6T5N7_MAIZE); contains Interpro domain(s) IPR000086 NUDIX hydrolase domain	-	-	-	-	-	-	-	-	-	AT1G73540	plastid	-	-
Solyc12g040870.1.1*	Nudix hydrolase 4 (AHRD V1 ***- B6T5N7_MAIZE); contains Interpro domain(s) IPR000086 NUDIX hydrolase domain	-	-	-	-	-	-	-	-	-	AT2G01670*	plastid	-	-
Solyc12g040870.1.1*	Nudix hydrolase 4 (AHRD V1 ***- B6T5N7_MAIZE); contains Interpro domain(s) IPR000086 NUDIX hydrolase domain	-	-	-	-	-	-	-	-	-	AT3G26690	plastid	-	-
[truncated: 11,073 more rows]

## Sheet: Table S3B legend
Table S3B Legend. The tomato homologs of the 11,443 Arabidopsis proteins with evidence for chloroplast localization by one or more Arabidopsis databases A.
[truncated: 9 more rows]

## Sheet: Table S3C
Table S3C. The tomato stromal proteome and Arabidopsis orthologs reported in PPDB, SUBA4, and plprot
[truncated: 3,490 more rows]

[truncated: 3 more sheets: Table S3C Legend, Table S3D fruit, Table S3D Legend]
