# Supplementary material for: The tomato chloroplast stromal proteome compendium elucidated by leveraging a plastid protein-localization prediction Atlas
Source: Front Plant Sci. 2023 Aug 28;14:1020275. doi: 10.3389/fpls.2023.1020275 (PMC10493611; doi:10.3389/fpls.2023.1020275)
Supplement: Supplementary file 6 [file Table_4.xlsx]

## Sheet: TableS4A-Membrane proteins
Table S4A. Tomato integral membrane proteinsA
Gene and protein descriptors					ProteomicsB					Number of times detected			Database location		Algorithm Predictions
Tomato Gene ID	Gene nameC	DescriptorD	Arabidopsis homolog	NCBI Accession	Number of Peptides	Number of PSMs	Unique Peptides	emPAI	Mol %	Acetone	Gel	Total	PPDB	CCTOP (# TM domains)E	DeepTMHMM (# TM domains)E	TMPred (Max # TM domains)E	TargetP (v1)F	TargetP (v1) Reliability Class	ChloroPG	PredotarH	WoLF PSORI	YLocI	YLoc % confidence
544163613	PSAA	Photosystem I P700 apoprotein A1 (chloroplast) [Solanum lycopersicum]	Atcg00350	YP_008563088.1	1	1	1	0.155	0.00099952	1	0	1	thylakoid-integral	11	11	13	-	-	-	-	-	-	-
544163612	PSAB	Photosystem I P700 apoprotein A2 (chloroplast) [Solanum lycopersicum]	Atcg00340	YP_008563087.1	3	8	2	1.154	0.00744159	4	0	4	thylakoid-integral	11	11	14	-	-	-	-	-	-	-
Solyc02g069460	PSAF	Photosystem I reaction center subunit III (AHRD V1 ***- Q9XQB4_PHAAU); contains Interpro domain(s) IPR003666 Photosystem I reaction centre protein PSAF, subunit III	At1g31330	XP_004233198.1	3	3	1	1.154	0.00744159	2	1	3	thylakoid-integral	2	2	2	Cp	1	Cp	Cp	Cp	Cp	100
Solyc02g069450	PSAF	Photosystem I reaction center subunit III (AHRD V1 ***- Q9XQB4_PHAAU); contains Interpro domain(s) IPR003666 Photosystem I reaction centre protein PsaF, subunit III	AT1G31330	XP_004233199.1	3	4	1	-	0	0	1	1	thylakoid-integral	2	2	2	Cp	3	Cp	Cp	Cp	Cp	100
Solyc07g066150	PSAG	Photosystem I reaction center subunit V (AHRD V1 ***- B6U534_MAIZE); contains Interpro domain(s) IPR017494 Photosystem I reaction center, PSAG, plant	At1g55670	XP_004244001.1	1	1	1	1.154	0.00744159	1	0	1	thylakoid-integral	2	1	2	Cp	1	Cp	Cp	Cp	Cp	100
Solyc08g006930	PSAK	Photosystem I reaction center subunit X PSAK (AHRD V1 ***- Q84QE6_TOBAC); contains Interpro domain(s) IPR017493 Photosystem I reaction center, PSAK, plant	At1g30380	XP_004244537.1	2	4	2	3.642	0.0234855	4	3	7	thylakoid-integral	0	1	1	Cp	3	Cp	Cp	Cp	Cp	100
Solyc06g082940	PSAL	Photosystem I reaction center subunit XI (AHRD V1 ***- B6SHL1_MAIZE); contains Interpro domain(s) IPR003757 Photosystem I reaction centre, subunit XI PSAL	At4g12800	XP_004242464.1	2	5	0	0.585	0.00377238	3	2	5	thylakoid-integral	3	3	4	Cp	2	Cp	Cp	Cp	Cp	100
544163593	PSBA	Photosystem II protein D1 (chloroplast) [Solanum lycopersicum]	Atcg00020	YP_008563068.1	2	3	2	0.668	0.00430761	2	2	4	thylakoid-integral	5	5	6	-	-	-	-	-	-	-
544163638	PSBB	Photosystem II CP47 chlorophyll apoprotein (chloroplast) [Solanum lycopersicum]	Atcg00680	YP_008563114.1	2	3	2	0.52	0.00335323	2	1	3	thylakoid-integral	6	6	7	-	-	-	-	-	-	-
544163609	PSBC	Photosystem II CP43 chlorophyll apoprotein (chloroplast) [Solanum lycopersicum]	Atcg00280	YP_008563084.1	1	1	1	0.212	0.00136709	1	1	2	thylakoid-integral	6	6	8	-	-	-	-	-	-	-
544163608	PSBD2	Photosystem II protein D2 (chloroplast) [Solanum lycopersicum]	Atcg00270	YP_008563083.1	1	1	0	-	0	0	1	1	thylakoid-integral	5	5	7	-	-	-	-	-	-	-
544163630	PSBE	Photosystem II cytochrome b559 alpha subunit (chloroplast) [Solanum lycopersicum]	Atcg00580	YP_008563105.1	1	1	1	<0.038	0	1	0	1	thylakoid-integral	1	1	1	-	-	-	-	-	-	-
Solyc07g066310	PSBR	Photosystem II 10-kDa polypeptide, PSBR (AHRD V1 ***- Q6V7X5_TRIPR); contains Interpro domain(s) IPR006814 Photosystem II protein PSBR	At1g79040	NP_001234042.1	2	4	2	1.154	0.00744159	3	2	5	thylakoid-integral	1	1	1	Cp	2	Cp	Cp	Cp	Cp	100
Solyc06g060340	PSBS CP22	Photosystem II subunit S	At1g44575	NP_001296186.1 Walbraun et al 1994	2	3	2	0.389	0.00250847	3	1	4	thylakoid-integral	4	4	4	Cp	2	Cp	Cp	not Cp	Cp	100
Solyc11g042640	PSB33	Rieske (2Fe-2S) domain protein (AHRD V1 *-*- C7QP67_CYAP0); contains Interpro domain(s) IPR017941 Rieske [2Fe-2S] iron-sulphur domain	At1g71500	XP_004250718.1	9	30	9	3.642	0.0234855	5	3	8	thylakoid	0	1	3	Cp	4	Cp	Cp	Cp	M	92.2
Solyc02g070980	CAB1A LHCB1A	Chlorophyll a_b binding protein IPR001344 Chlorophyll A-B binding protein	At2g34430	NP_001316869.1 Pichersky et al 1985	2	4	0	-	0	0	3	3	thylakoid-integral	0	3	4	Cp	2	Cp	Cp	Cp	Cp	100
Solyc02g070940	CAB1B LHCB1B	Chlorophyll a/b binding protein (AHRD V1 **** Q41422_SOLTU); contains Interpro domain(s) IPR001344 Chlorophyll A-B binding protein	At2g34430	NP_001316856.1 Pichersky et al 1985	2	4	0	-	0	0	3	3	thylakoid-integral	0	3	4	Cp	2	Cp	Cp	Cp	Cp	100
Solyc03g005780	CAB3C LHCB3C	Chlorophyll a-b binding protein 3C (AHRD V1 **** Q2XTE0_SOLTU); contains Interpro domain(s) IPR001344 Chlorophyll A-B binding protein	At1g29930	NP_001316912.1 Pichersky et al 1985	2	5	1	0.931	0.00600357	5	0	5	thylakoid-integral	0	3	4	Cp	2	Cp	Cp	Cp	Cp	100
Solyc10g007690	CAB8A	Chlorophyll a-b binding protein 8, chloroplastic (AHRD V1 ***- CB13_SOLLC); contains Interpro domain(s) IPR001344 Chlorophyll A-B binding protein	At1g61520	NP_001332771.1 Pichersky et al 1989	2	9	1	0.995	0.00641628	3	2	5	thylakoid-integral	3	3	5	Cp	1	Cp	Cp	Cp	Cp	100
Solyc12g011280	CAB8B	Chlorophyll a-b binding protein 8, chloroplastic (AHRD V1 ***- CB13_SOLLC); contains Interpro domain(s) IPR001344 Chlorophyll A-B binding protein	At1g61520	XP_004251826.1	2	4	1	1.154	0.00744159	1	0	1	thylakoid-integral	0	3	4	Cp	2	Cp	Cp	Cp	Cp	100
Solyc06g063370	CAB9 LHCB9	Chlorophyll a-b binding protein; Type I CAB (26 kDa) CP29, chloroplastic	At4g10340	NP_001317571.1 Pichersky et al 1991	6	23	6	2.415	0.0155732	5	3	8	thylakoid-integral	0	3	4	Cp	3	Cp	Cp	Cp	Cp	100
Solyc03g115900	CAB11	Chlorophyll a-b binding protein P4, chloroplastic (AHRD V1 ***- CB24_PEA); contains Interpro domain(s) IPR001344 Chlorophyll A-B binding protein	At3g47470	NP_001316908.1 Schwartz et al 1991	1	1	0	0.292	0.00188297	1	0	1	thylakoid-integral	3	1	3	Cp	4	Cp	Cp	Cp	Cp	100
Solyc12g011450	CAB13 LHCB13	Chlorophyll a-b binding protein 13, chloroplastic (AHRD V1 ***- CB23_SOLLC); contains Interpro domain(s) IPR001344 Chlorophyll A-B binding protein	At5g54270	NP_001296244.1 Schwartz et al 1991	1	1	0	-	0	0	1	1	thylakoid-integral	0	3	4	Cp	3	Cp	Cp	Cp	Cp	100
Solyc08g007180	LH-like3a	LH-like3-Light harvesting-like protein 3 (AHRD V1 **-- A9P991_POPTR)	At4g17600	XP_004244555.1	2	2	1	0.585	0.00377238	1	0	1	thylakoid-integral	2	2	3	Cp	2	Cp	Cp	Cp	Cp	86.8
Solyc08g077880	LH-like3b	LH-like3- Light harvesting-like protein 3 (AHRD V1 **-- B9N2V9_POPTR); based on At- encodes a light-harvesting-like protein that is involved in chlorophyll and tocopherol biosynthesis anchoring geranylgeranyl reductase in the thylakoid membrane.	At5g47110	XP_004245825.1	3	6	2	0.995	0.00641628	5	2	7	thylakoid-integral	2	2	3	Cp	2	Cp	Cp	Cp	Cp	97
Solyc09g014520	-	Chlorophyll a-b binding protein CP29.1, chloroplastic (NCBI), Chlorophyll a-b binding protein 6A, chloroplastic (AHRD V1 **** CB11_SOLLC); contains Interpro domain(s) IPR001344 Chlorophyll A-B binding protein	At3g08940	XP_004246325.1	3	5	3	0.778	0.00501695	2	0	2	thylakoid-integral	3	3	3	Cp	4	-	Cp	Cp	Cp	100
Solyc09g011010	OHP1	One helix protein 1 (AHRD V1 ***- Q84N30_IPONI)	At5g02120	XP_004246456.1	1	2	1	0.585	0.00377238	2	0	2	thylakoid-integral	0	1	2	Cp	3	Cp	Cp	Cp	Cp	100
Solyc04g071930	OHP2	One helix protein 2 (AHRD V1 **-- B9H7V8_POPTR)	At1g34000	XP_004237827.1	3	12	2	0.995	0.00641628	5	1	6	thylakoid-integral	0	1	1	Cp	1	Cp	Cp	Cp	Cp	99.5
Solyc01g112060	YCF244	Uncharacterized protein ycf39 (NCBI); similar to AtHCF244; NmrA family protein (AHRD V1 **-- B2J8Q2_NOSP7); contains Interpro domain(s) IPR016040 D(P)-binding domain	At4g35250	XP_004231083.1	9	49	9	1.994	0.0128583	5	3	8	thylakoid	0	0	4	Cp	2	Cp	Cp	Cp	Cp	99.5
Solyc05g014310	HHL1	HHL1-Hypersensitive to highlight	At1g67700	XP_004239174.1	4	12	4	0.668	0.00430761	5	1	6	plastid	0	0	1	Cp	4	-	possibly Cp	Cp	N	65.6
Solyc08g075990	-	Low PSII accumulation 3, chloroplastic (NCBI, TAIR)	At5g48790	XP_004245955.1	5	18	5	1.276	0.00822831	5	3	8	thylakoid	0	0	1	Cp	4	Cp	Cp	Cp	Cp	72.7
Solyc01g096660	MPH1	PSII-associated proline-rich protein (NCBI); MAINTENANCE OF PSII UNDER HIGH LIGHT 1, MPH1 (At5g07020)	At5g07020	NP_001234524.1	4	51	4	4.623	0.0298115	5	3	8	thylakoid	0	1	2	Cp	2	Cp	Cp	Cp	Cp	97.5
Solyc01g095430	CURT1A	Curvature thylakoid 1A	At4g01150	XP_004229969.1	2	5	2	2.162	0.0139417	4	3	7	thylakoid-integral	2	2	3	Cp	1	Cp	Cp	Cp	Cp	99.8
Solyc10g011770	CURT1A	Curvature thylakoid 1A	At4g01150	XP_004248070.1	3	8	3	2.162	0.0139417	3	2	5	thylakoid-integral	2	2	3	_	3	-	Cp	Cp	Cp	99.9
Solyc10g005050	CURT1B PSAP pTAC8	Curvature thylakoid 1B, chloroplastic	At2g46820	XP_004248418.1	2	2	2	1.512	0.00975016	2	0	2	thylakoid	2	2	2	Cp	1	Cp	Cp	Cp	Cp	99.8
Solyc06g066620	CURT1C	Curvature thylakoid 1C; Thylakoid membrane	At1g52220	XP_004241735.1	1	3	1	0.292	0.00188297	3	1	4	thylakoid	2	2	2	Cp	4	Cp	Cp	Cp	Cp	87.5
Solyc11g010480	CURT1D	Curvature thylakoid 1D; CAAD protein superfamily	At4g38100	XP_004250138.1	13	26	13	2.631	0.0169661	5	2	7	thylakoid	2	2	2	Cp	2	Cp	Cp	Cp	N	77.6
Solyc05g009930	CHUP1	Chloroplast unusual positioning 1	At3g25690	XP_010320785.1	2	4	2	0.093	0.000599712	4	0	4	envelope-outer	0	0	1	S	2	-	ER	Cp	N	54.26
Solyc01g105990	EX1	Executer 1	At4g33630	XP_004230540.1	2	2	2	0.122	0.000786719	2	0	2	thylakoid	0	0	1	Cp	1	Cp	Cp	Cp	N	37.9
Solyc06g071430	EX2	Executer 2	At1g27510	XP_004241496.1	10	17	10	0.968	0.00624217	5	2	7	thylakoid	0	0	1	Cp	1	Cp	Cp	Cp	Cp	97.6
Solyc01g097860	FLAP1	Fluctuating light acclimation protein 1	At1g54520	XP_004230121.1	1	1	1	0.179	0.00115428	1	1	2	plastid	2	0	2	-	5	-	Cp	Cp	PM	94.3
Solyc03g062710	NDF5	NDH-Dependent cyclic electron flow 5	At1g55370	XP_004234805.1	2	3	2	0.468	0.00301791	3	0	3	thylakoid	0	0	5	Cp	1	Cp	Cp	Cp	Cp	99.7
Solyc12g036170	NDF6 PNSB4	NDH Dependent flow 6 (NDF6); NNADH complex. photosynthetic NNADH subunit of subcomplex B 4	At1g18730	XP_004252225.1	2	6	2	1.371	0.00884092	3	1	4	thylakoid-integral	0	1	1	Cp	1	Cp	possibly Cp	Cp	Cp	40.9
Solyc09g083190	NDH18 PNSB5	Photosynthetic NDH subunit of subcomplex B 5, chloroplastic (NCBI)	At5g43750	XP_004247633.1	1	1	1	0.585	0.00377238	1	0	1	thylakoid-integral	1	2	3	Cp	3	Cp	possibly Cp	Cp	PM	90.8
Solyc03g116870	NDH48 NDF1 PNSB1	NAD(P)H dehydrogenase subunit 48; photosynthetic NDH subunit of subcomplex B 1 (NCBI)	At1g15980	XP_004235943.1	1	2	1	0.136	0.000876999	2	0	2	thylakoid	0	0	5	Cp	2	Cp	Cp	Cp	Cp	94.7
544163670	NDHH	NADH-plastoquinone oxidoreductase subunit 7 (chloroplast) [Solanum lycopersicum]	Atcg01110	YP_008563145.1	11	47	11	9	0.0580367	5	3	8	thylakoid	0	0	2	-	-	-	-	-	-	-
544163616	NDHJ	NADH-plastoquinone oxidoreductase subunit J (chloroplast) [Solanum lycopersicum]	Atcg00420	YP_008563091.1	6	20	6	6.499	0.0419089	5	3	8	thylakoid	0	0	2	-	-	-	-	-	-	-
Solyc04g057980	NDHM	NAD(P)H-quinone oxidoreductase subunit M (AHRD V1 *-*- D8G7H3_9CYAN); contains Interpro domain(s) IPR018922 NAD(P)H-quinone oxidoreductase subunit M	At4g37925	XP_004237361.1	3	13	3	2.162	0.0139417	5	2	7	thylakoid	0	0	1	Cp	5	Cp	Cp	Cp	Cp	71.1
Solyc09g083150	NDHN	NAD(P)H-quinone oxidoreductase subunit N (AHRD V1 *-*- D4ZT43_SPIPL)	At5g58260	XP_004247632.1	3	8	3	0.931	0.00600357	2	1	3	thylakoid	0	0	0	Cp	3	Cp	Cp	Cp	Cp	91.6
Solyc11g006020	NDHO	NAD(P)H-quinone oxidoreductase subunit O (AHRD V1 *-*- NNADHO_GLOVI)	At1g74880	XP_004249910.1	5	54	5	20.544	0.132478	5	3	8	thylakoid	0	0	2	Cp	2	Cp	Cp	Cp	Cp	80.1
Solyc08g082400	NDHS	NAD(P)H-quinone oxidoreductase subunit S, chloroplastic	At4g23890	XP_004245512.1	9	44	9	12.895	0.0831536	5	3	8	thylakoid	0	0	1	Cp	1	Cp	Cp	Cp	Cp	84.8
Solyc09g018890	NDHV	NAD(P)H-quinone oxidoreductase subunit V, chloroplastic	At2g04039	XP_004246251.1	5	31	5	9	0.0580367	5	3	8	plastid	0	0	1	Cp	2	Cp	Cp	Cp	Cp	98.4
Solyc06g082970	NDHU CRRL	NAD(P)H-quinone oxidoreductase subunit U, chloroplastic (NCBI); DnaJ domain family (AHRD V1 ***- Q84VQ4_ARATH); contains Interpro domain(s) IPR001623 Heat shock protein DnaJ, N-terminal	At5g21430	XP_004242446.1	3	14	3	3.642	0.0234855	5	0	5	thylakoid-integral	1	1	3	Cp	5	Cp	possibly Cp	Cp	C	72.8
Solyc03g062720	PNSB2 NDH45 NDF2	Photosynthetic NDH subunit of subcomplex B 2, chloroplastic	At1g64770	XP_004234806.1	4	37	4	4.179	0.0269484	5	3	8	thylakoid	0	0	2	Cp	2	Cp	Cp	Cp	Cp	96.9
Solyc08g083360	PNSB3 NDF4	NDF4, NADH-DEPENDENT CYCLIC ELECTRON FLOW 1, PHOTOSYNTHETIC NADH SUBCOMPLEX B 3, PNSB3	At3g16250	XP_004245440.1	1	3	1	0.292	0.00188297	3	2	5	thylakoid	0	0	2	M	5	-	none	Cp	Cp	91.2
Solyc08g080050	PGRL1A	PGR5-like protein 1A, chloroplastic (AHRD V1 ***- PGL1A_ARATH) Proton gradient regulation 5	At4g22890	XP_004245668.1	2	2	2	0.468	0.00301791	2	1	3	thylakoid-integral	2	2	3	Cp	2	Cp	Cp	Cp	Cp	91.6
544163626	PETA	Cytochrome f (chloroplast) [Solanum lycopersicum]	Atcg00540	YP_008563101.1	8	24	4	3.394	0.0218863	5	3	8	thylakoid-integral	1	1	2	-	-	-	-	-	-	-
544163642	PETB	Cytochrome b6 (chloroplast) [Solanum lycopersicum]	Atcg00720	YP_008563118.1	1	2	1	0.468	0.00301791	1	0	1	thylakoid-integral	4	4	5	-	-	-	-	-	-	-
544163599	ATPF	ATP synthase CF0 subunit I (chloroplast) [Solanum lycopersicum]	Atcg00130	YP_008563074.1	4	11	4	1.424	0.00918269	5	2	7	thylakoid-integral	1	1	1	-	-	-	-	-	-	-
Solyc06g065990	ATPG	ATP synthase subunit b' (AHRD V1 ***- D8G4T7_9CYAN); contains Interpro domain(s) IPR002146 ATPase, F0 complex, subunit B/B', bacterial and chloroplast	At4g32260	XP_004241780.1	6	35	1	7.254	0.0467776	5	3	8	thylakoid-integral	2	2	4	Cp	1	Cp	Cp	Cp	Cp	99.9
Solyc10g005180	Y3IP1	YCF3-interacting protein 1	At5g44650	XP_004248408.1	3	10	3	2.162	0.0139417	5	0	5	thylakoid	1	1	2	Cp	1	Cp	Cp	Cp	PM	81.3
Solyc01g008160	SG1	SG1, SLOW GREEN 1; Tetratricopeptide repeat-containing protein (AHRD V1 ***- D7L8H9_ARALY); contains Interpro domain(s) IPR011990 Tetratricopeptide-like helical	At3g18420	XP_004228536	6	13	6	1.404	0.00905372	5	1	6	envelope	0	0	2	Cp	2	Cp	Cp	Cp	Cp	98.4
Solyc01g087750	RER4	Protein RETICULATA-RELATED 4, (NCBI); Homology to unknown gene (Fragment) (AHRD V1 ***- Q015C3_OSTTA) [PREDICTED: protein RETICULATA-RELATED 4, chloroplastic]	At5g12470	XP_004229662.1	1	2	1	0.145	0.000935035	2	3	5	envelope-inner-integral	3	0	6	Cp	2	Cp	Cp	Cp	Cp	99.9
Solyc03g124030	-	TPR repeat protein (AHRD V1 *--- A0ZBH5_NODSP); contains Interpro domain(s) IPR011990 Tetratricopeptide-like helical	At1g78915	XP_004235499.1	9	21	9	1.424	0.00918269	5	3	8	thylakoid	1	1	1	Cp	5	Cp	Cp	Cp	C	65.3
Solyc06g005710	pTAC16	Protein PLASTID TRANSCRIPTIONALLY ACTIVE 16	AT3G40690	XP_004240374.1	20	105	20	5.404	0.0348478	5	3	8	thylakoid	0	0	3	Cp	2	Cp	Cp	Cp	Cp	69.1
Solyc11g066110	ALB3	Albino3; inner membrane protein PPF-1, chloroplastic isoform X1 (NCBI); Inner membrane protein oxaA (AHRD V1 *-*- B9L0L4_THERP); contains Interpro domain(s) IPR001708 Membrane insertion protein, OxaA/YidC	At2g28800	XP_004250966.1	1	2	1	0.212	0.00136709	2	0	2	thylakoid-integral	4	5	7	Cp	3	Cp	Cp	Cp	M	67.2
Solyc05g014050	ALB4	Albino3-like protein 1, chloroplastic (NCBI); Inner membrane protein oxaA (AHRD V1 *-*- B9L0L4_THERP); contains Interpro domain(s) IPR001708 Membrane insertion protein, OxaA/YidC	At1g24490	XP_010320958.1	4	19	4	1.081	0.00697085	5	0	5	thylakoid-integral	4	4	6	Cp	2	Cp	Cp	Cp	M	70.3
Solyc01g097310	TATA	Sec-independent protein translocase protein tatA/E homolog (AHRD V1 *-*- D7DW94_NOSA0); contains Interpro domain(s) IPR006312 Twin-arginine translocation protein TatA/E	At5g28750	XP_004230095.1	4	15	4	9	0.0580367	5	0	5	thylakoid-integral	1	0	3	Cp	1	Cp	Cp	Cp	Cp	90.4
Solyc03g025310	TATB HCF106	Sec-independent protein translocase protein tatA/E homolog (AHRD V1 *-*- D4TUR0_9NOST); contains Interpro domain(s) IPR006312 Twin-arginine translocation protein TatA/E	At5g52440	XP_004234427.1	5	29	5	1.154	0.00744159	5	3	8	thylakoid-integral	1	0	4	M	5	Cp	none	Cp	C	75.9
Solyc09g031780	TIC110	Protein TIC110, chloroplastic isoform X2	At1g06950	XP_004246966.1	5	11	5	0.259	0.00167017	5	3	8	envelope-inner-integral	1	0	5	Cp	3	Cp	possibly Cp	Cp	Cp	92.8
Solyc03g025410	TIC32	TIC32, Dehydrogenase/reductase SDR family member 13 (AHRD V1 ***- DHR13_BOVIN); contains Interpro domain(s) IPR002347 Glucose/ribitol dehydrogenase [TIC32-like, NAD(P)-binding Rossmann-fold superfamily protein]	At4g23430	XP_004234415.1	5	18	5	1.894	0.0122135	5	3	8	-	0	0	4	-	4	-	none	Cp	Cp	98.9
Solyc08g081200	TIC32	TIC32, Dehydrogenase/reductase SDR family member 13 (AHRD V1 ***- DHR13_BOVIN); contains Interpro domain(s) IPR002347 Glucose/ribitol dehydrogenase [TIC32-like, NAD(P)-binding Rossmann-fold superfamily protein]	At4g23430	XP_004245595.1	2	2	2	0.52	0.00335323	1	2		-	0	0	4	-	4	-	none	Cp	Cp	98.9
Solyc11g020300	TIC40	Translocon TIC40 (AHRD V1 ***- Q9SC41_PEA); contains Interpro domain(s) IPR006636 Heat shock chaperonin-binding	At5g16620	XP_004250413.1	3	11	3	0.896	0.00577787	5	0	5	envelope-inner-integral	1	0	2	Cp	2	Cp	Cp	Cp	Cp	60.8
Solyc12g096550	TIC55	TIC 55, chloroplasTIC	At2g24820	XP_004253047.1	1	1	1	0.096	0.000619058	1	0	1	envelope-inner-integral	2	0	3	Cp	4	-	none	Cp	Cp	67.1
Solyc09g074940	TOC159	Translocase of chloroplast 159, chloroplastic	At4g02510	XP_010326580.1	5	14	5	0.238	0.00153475	5	2	7	envelope-outer	0	0	4	Cp	3	Cp	none	Cp	C	99.4
Solyc03g116790	DJA7	Chaperone protein DnaJ (AHRD V1 ***- B6TAJ2_MAIZE); contains Interpro domain(s) IPR012724 Chaperone DnaJ	At1g80030	XP_004235949.1	5	16	5	0.995	0.00641628	5	2	7	thylakoid	0	0	4	Cp	1	Cp	Cp	Cp	Cp	98.8
Solyc04g009940	CJD1	Chloroplast J-like domain1, CJD1 (At1g08640); Heat shock protein binding protein (AHRD V1 **-- D7KIU0_ARALY) Thylakoid memberane	At1g08640	XP_004236791.1	1	3	1	0.468	0.00301791	3	0	3	envelope-inner-integral	2	4	3	Cp	2	Cp	Cp	Cp	Cp	98.7
Solyc01g108200	SCO2	Protein disulfide-isomerase SCO2 (SNOWY COTYLEDON)	At3g19220	XP_010315236.1	1	3	1	0.931	0.00600357	3	0	3	thylakoid	0	0	2	Cp	2	Cp	Cp	Cp	Cp	94.6
Solyc01g105340	DJA6	chaperone protein dnaJ A7A, chloroplastic-like	At2g22360	XP_004230549.1	8	36	8	2.981	0.019223	5	1	6	thylakoid	0	0	2	M	4	-	possibly M	Cp	M	60.03
Solyc06g005940	PDIL1-1	PDIL-Protein disulfide isomerase-like IPR005792 Protein disulphide isomerase; similar to AtPDIL1-1	At1g21750	XP_004240392.1	16	67	16	8.085	0.0521363	5	3	8	-	0	4	1	S	1	-	ER	Cp	ER	96.12
Solyc06g060290	PDIL1-1	PDIL-Protein disulfide isomerase IPR005792 Protein disulphide isomerase; similar to AtPDIL1-1	At1g21750	XP_004242032.1	15	46	14	4.754	0.0306563	5	1	6	-	0	0	2	S	1	-	ER	Cp	ER	99.24
Solyc07g064940	HCF164	Thioredoxin family protein (AHRD V1 *-*- Q1EPD8_MUSAC); contains Interpro domain(s) IPR013766 Thioredoxin domain; HCF164- reduction cytochrome/b6f complex	At4g37200	XP_004244089.1	5	7	5	1.276	0.00822831	4	3	7	thylakoid-peripheral-stromal-side	0	1	1	M	4	-	possibly M	Cp	Cp	94.2
Solyc11g018550	tAPX6	Thylakoid-bound ascorbate peroxidase 6	At1g77490	NP_001234631.2 Najami et al 2008	10	52	4	3.062	0.0197454	3	2	5	thylakoid-integral	1	1	3	Cp	1	Cp	Cp	Cp	Cp	63.2
Solyc10g081470	EGY1 Lutescent2 (L2)	Lutescent 2, (Egy1 ortholog) Peptidase M50 family protein (AHRD V1 ***- C1FJH6_9CHLO); contains Interpro domain(s) IPR008915 Peptidase M50	At5g35220	NP_001299816.1	1	1	1	0.179	0.00115428	1	0	1	nucleus; envelope-outer	7	7	9	Cp	2	Cp	Cp	Cp	PM	99.5
Solyc06g019200	EGY2	Probable zinc metalloprotease EGY2, chloroplastic isoform X2; Peptidase M50 family protein (AHRD V1 ***- D7LZ04_ARALY); contains Interpro domain(s) IPR008915 Peptidase M50	At5g05740	XP_004240688.1	1	2	1	0.292	0.00188297	2	0	2	thylakoid	6	7	8	Cp	3	-	none	Cp	PM	100
Solyc10g086570	FIP	FtsH5 interacting protein (FIP) (TAIR)	At5g02160	NP_001234311.1	1	1	1	0.389	0.00250847	1	2	3	thylakoid-integral	1	0	1	Cp	3	Cp	Cp	Cp	Cp	96.5
Solyc03g007330	FTSH11	Cell division protease FTSH homolog (AHRD V1 *-*- FTSH_RICTY); contains Interpro domain(s) IPR005936 Peptidase M41, FTSH	At5g53170	XP_004234177.1	1	2	1	0.077	0.000496536	2	0	2	envelope	1	2	4	Cp	2	Cp	none	Cp	ER	80
Solyc07g055320	FTSH2	ATP-dependent zinc metalloprotease FTSH 2, chloroplastic (NCBI)	At2g30950	XP_004243266.1	16	152	12	7.432	0.0479254	5	3	8	thylakoid-integral	2	2	4	Cp	5	Cp	possibly Cp	Cp	C	100
Solyc04g082250	FTSH5	ATP-dependent zinc metalloprotease FTSH, chloroplastic (Fragment) (AHRD V1 ***- FTSH_CAPAN); contains Interpro domain(s) IPR005936 Peptidase M41, FTSH	At5g42270	NP_001234196.2	21	158	20	11.915	0.0768341	5	3	8	thylakoid-integral	1	2	6	Cp	2	Cp	Cp	Cp	Cp	92.6
Solyc06g005950	FTSH7	Cell division protease FtsH homolog IPR005936 Peptidase M41, FtsH	At3g47060	XP_004240393.1	1	1	1	0.061	0.00039336	1	0	1	envelope	2	2	7	_	4	-	none	Cp	Cp	98.14
Solyc03g005000	-	Peptidase M48 Ste24p (AHRD V1 ***- B6TA12_MAIZE); contains Interpro domain(s) IPR001915 Peptidase M48, Ste24p	At3g27110	XP_004233997.1	3	6	3	0.438	0.00282445	3	2	5	plastoglobules	0	0	2	Cp	3	Cp	Cp	Cp	G	45.9
Solyc02g049070	-	rRNA small subunit methyltransferase J [At5g08540]	At5g08540	XP_004231721.1	2	4	2	0.334	0.00215381	3	0	3	envelope-inner	1	2	2	Cp	1	Cp	Cp	Cp	Cp	99.3
Solyc03g096850	ENH1	Similar to AtENH1 (enhancer of SOS3)	At5g17170	XP_004235309.1	3	5	3	0.54	0.0034822	4	2	6	thylakoid	1	1	2	Cp	1	Cp	Cp	Cp	Cp	99.9
Solyc01g102950	LYCB	Lycopene beta/epsilon cyclase protein [At2g32640], manual annotation	At2g32640	XP_004230408.1	2	4	2	0.245	0.00157989	2	0	2	thylakoid	0	0	5	M	4	Cp	Cp	Cp	M	44.9
Solyc08g008630	-	beta-carotene isomerase D27, chloroplastic (AHRD V1 ***- Q014B2_OSTTA) [PREDICTED: beta-carotene isomerase D27, chloroplastic]	At1g64680	XP_004244658.1	5	22	5	2.981	0.019223	5	3	8	plastid	0	0	2	Cp	3	-	possibly M	Cp	Cp	93.6
Solyc08g076360	VTE4	Gamma-tocopherol methyltransferase (AHRD V1 **** Q1PBH9_SOLLC); contains Interpro domain(s) IPR013216 Methyltransferase type 11	At1g64970	NP_001233814.1	4	9	4	0.668	0.00430761	5	3	8	envelope	0	0	4	Cp	1	Cp	Cp	Cp	Cp	99.9
Solyc02g083270	VKOR LTO1	Vitamin K epoxide reductase (AHRD V1 **-- B4AXQ4_9CHRO); contains Interpro domain(s) IPR012932 Vitamin K epoxide reductase; Similar to AtLto1 (Lumenal thiol oxidoreductase)	At4g35760	NP_001298273.1	3	5	3	1.154	0.00744159	2	0	2	thylakoid-integral	5	5	6	Cp	1	Cp	Cp	Cp	Cp	99.9
Solyc03g005230	VTE3	2-methyl-6-phytyl-1,4-hydroquinone methyltransferase, chloroplastic	At3g63410	XP_010317394.1	4	11	3	0.931	0.00600357	5	0	5	envelope-inner-integral	2	0	4	Cp	1	Cp	Cp	Cp	Cp	100
Solyc03g115980	GGR CHLP	Geranylgeranyl reductase (AHRD V1 ***- Q1ZYL0_OLEEU); contains Interpro domain(s) IPR011774 Geranylgeranyl reductase, plants and cyanobacteria	At1g74470	XP_004235993.1	11	38	9	2.631	0.0169661	5	3	8	thylakoid	0	0	1	Cp	2	Cp	Cp	Cp	Cp	99.8
Solyc09g009820	-	Glutathione S-transferase domain protein (AHRD V1 *--- C6RLV9_ACIRA); contains Interpro domain(s) IPR004045 Glutathione S-transferase, N-terminal	At5g03880	XP_004246517.1	1	2	1	0.292	0.00188297	2	2	4	thylakoid	2	0	2	Cp	1	Cp	Cp	Cp	Cp	93.6
Solyc02g070490	CLD1	Chlorophyll dephytylase1, CLD1; Alpha_beta hydrolase fold IPR000073 Alpha_beta hydrolase fold-1	At5g38520	XP_004233123.1	4	16	4	0.778	0.00501695	5	2	7	thylakoid	0	0	6	_	2	-	possibly M	Cp	Cp	54.13
Solyc05g018650	FC2	Ferrochelatase 2 (AHRD V1 **** O64391_SOLTU); contains Interpro domain(s) IPR001015 ferrochelatase	At2g30390	XP_010321072.1	3	3	3	0.585	0.00377238	2	0	2	plastid	0	0	3	Cp	2	Cp	Cp	Cp	Cp	56.6
Solyc06g008160	FLU1	Fluorscent in blue light, chloroplastic-like isoform 1 [NBCI] Chloroplast FLU-like protein (Fragment) (AHRD V1 *--- D2K2R8_PICAB); contains Interpro domain(s) IPR011990 Tetratricopeptide-like helical	At3g14110	NP_001332946.1	4	6	4	0.778	0.00501695	5	1	6	thylakoid; envelope-inner	2	0	2	-	3	-	possibly M	Cp	C	42.4
Solyc09g072880	FLU2	Fluorscent in blue light, chloroplastic-like isoform 1 [NBCI] IPR011990 Tetratricopeptide-like helical	At3g14110	XP_004240478.1	1	1	1	0.194	0.00125101	1	0	1	thylakoid; envelope-inner	2	0	2	_	4	-	none	Cp	Cp	94.04
Solyc03g118240	CHLM	Magnesium-protoporphyrin IX methyltransferase (AHRD V1 **** D7MGJ7_ARALY); contains Interpro domain(s) IPR010251 Magnesium protoporphyrin O-methyltransferase	At4g25080	XP_004235845.1	19	84	19	43.367	0.279653	5	3	8	plastid	1	0	3	Cp	1	Cp	possibly Cp	Cp	Cp	99.8
Solyc03g044470	RCCR	Red chlorophyll catabolite reductase (Fragment) (AHRD V1 **** Q1ELT8_SOLLC); contains Interpro domain(s) IPR009439 Red chlorophyll catabolite reductase (ACD2)	At4g37000	XP_004234668.1	7	38	7	5.105	0.0329197	5	3	8	thylakoid; mitochondria	0	0	3	Cp	1	Cp	Cp	Cp	Cp	100
Solyc05g032660	NOL	Chlorophyll(ide) b reductase NOL, chloroplastic isoform X4	At5g04900	XP_010321272.1	2	4	2	0.233	0.0015025	3	2	5	thylakoid	0	0	2	Cp	1	Cp	Cp	Cp	Cp	94
Solyc11g066440	PAO ACD1	Pheophorbide a oxygenase, chloroplastic; lethal leaf spot 1-like protein (NCBI)	At3g44880	NP_001234535.2	1	3	1	0.105	0.000677094	3	0	3	thylakoid	2	0	4	Cp	1	Cp	Cp	Cp	PM	85.5
Solyc11g069800	AOS2	Allene oxide synthase 2; cytochrome P450	At5g42650	NP_001274707.1 Howe et al 2000	3	4	3	0.25	0.00161213	3	1	4	thylakoid	0	0	4	Cp	3	-	Cp	Cp	V	63.4
Solyc09g015650	FAX2	Fatty acid export 2, FAX2	At2g38550	XP_004246287.1	2	3	2	0.311	0.00200549	3	0	3	envelope-inner-integral	3	4	3	Cp	3	Cp	Cp	Cp	Cp	97.6
Solyc07g049690	HPL	Fatty acid hydroperoxide lyase, Cytochrome P450 74B	At4g15440	NP_001234420.2 Howe et al 2000	9	22	9	3.642	0.0234855	5	1	6	envelope-outer	1	0	5	-	5	-	none	Cp	Cp	99.9
Solyc06g068090	PLDA1	Phospholipase D IPR011402 Phospholipase D, plant	At1g52570	NP_001234102.2 Laxalt et at 2001	3	3	1	0.184	0.00118653	1	0	1	-	0	0	2	_	4	-	none	not Cp	C	98.88
Solyc08g066800	PLDA3	Phospholipase D (AHRD V1 **** Q9FR61_SOLLC); contains Interpro domain(s) IPR011402 Phospholipase D, plant	At3g15730	NP_001289824.2 Laxalt et at 2001	6	7	5	0.438	0.00282445	1	0	1	-	0	0	2	-	4	-	possibly Cp	not Cp	C	96.7
Solyc03g116620	PLDA4	Phospholipase D (AHRD V1 **** D2E4A5_9ROSI); contains Interpro domain(s) IPR011402 Phospholipase D, plant	At1g52570	XP_004235964.1	2	2	1	0.119	0.000767374	1	0	1	-	0	0	1	-	2	-	Cp	Cp	C	90.6
Solyc09g059040	CEQORH	Chloroplast envelope quinone oxidoreductase homolog	At4g13010	XP_010326282.1	2	7	2	0.413	0.00266324	3	0	3	envelope-inner-peripheral-stromal-side	0	0	3	-	3	-	none	Cp	Cp	98
Solyc09g059030	CEQORH	Chloroplast envelope quinone oxidoreductase homolog	At4g13010	XP_010326282.1	1	1	1	-	0	0	1	1	envelope-inner-peripheral-stromal-side	0	0	3	_	2	-	none	Cp	C	53.57
Solyc02g071710	-	GDSL esterase_lipase At1g29670 IPR001087 Lipase, GDSL	At1g29670	XP_004233007.1	7	21	6	3.394	0.0218863	5	3	8	-	0	0	3	S	1	-	ER	Cp	ER	98.2
Solyc12g009400	PDH-E1 ALPHA	Pyruvate dehydrogenase E1 component alpha subunit (AHRD V1 ***- Q5N030_SYNP6); contains Interpro domain(s) IPR017597 Pyruvate dehydrogenase (acetyl-transferring) E1 component, alpha subunit, subgroup y	AT1G01090	XP_004251713.1	6	10	0	-	0	0	3	3	envelope-inner-peripheral-stromal-side	0	0	0	Cp	1	Cp	Cp	Cp	M	67.3
Solyc04g083010	ABC1K3	ABC1-like kinase 3	At1g79600	NP_001311447.1	2	3	2	0.16	0.00103176	3	0	3	plastoglobules	0	0	3	Cp	2	-	possibly Cp	Cp	Cp	99.5
Solyc09g065160	FZL	Probable transmembrane GTPase FZO-like (FZL), chloroplastic isoform X1 [NCBI] dynamin family protein (AHRD V1 *--- D0MDN4_RHOM4); contains Interpro domain(s) IPR001401 dynamin, GTPase region	At1g03160	XP_004247163.1	17	44	17	2.162	0.0139417	5	3	8	thylakoid-integral; envelope-inner-integral	2	2	12	Cp	2	Cp	Cp	Cp	Cp	59
Solyc04g081070	ARC6	Hop-interacting protein THI044, ACR6 protein	At5g42480	NP_001265966.1	5	7	5	0.403	0.00259875	3	0	3	envelope-inner	3	1	2	Cp	5	Cp	Cp	Cp	Cp	42.9
Solyc04g076300	MSCS-like3	Mechanosensitive ion channel protein 3, chloroplastic isoform X1 (NCBI)	At1g58200	XP_010320208.2	1	1	1	0.064	0.000412705	1	0	1	envelope	5	6	7	Cp	4	-	Cp	Cp	PM	77.9
Solyc03g114450	CAS	Calcium sensing receptor (AHRD V1 ***- C7BCU7_LIQFO); contains Interpro domain(s) IPR001763 Rhodanese-like, thylakoid membrane	At5g23060	XP_004236097.1	2	4	2	0.179	0.00115428	3	1	4	thylakoid-integral; mitochondria	2	2	6	Cp	2	Cp	Cp	Cp	Cp	99.5
Solyc03g026310	ABCB20	ABC transporter permease/ATP-binding protein B family (AHRD V1 ***- A6ANR0_VIBHA); contains Interpro domain(s) IPR001140 ABC transporter, transmembrane region	At4g25450	NP_001353317.1 Ofori et al 2018 Andolfo et al 2015	1	3	1	0.096	0.000619058	3	3	6	envelope-inner-integral	6	6	4	Cp	3	Cp	Cp	Cp	PM	86.4
Solyc03g026320	ABCB30	ABC transporter I family B member; Lipid A export ATP-binding_permease protein MsbA	At4g25450	NP_001353549.1 Andolfo et al 2015	1	1	1	0.233	0.0015025	1	2	3	envelope-inner-integral	0	0	8	M	4	-	none	not Cp	M	94.71
Solyc04g056650	ABCI3-like	ABC transporter ATP-binding protein (AHRD V1 **** D4ZR39_SPIPL); contains Interpro domain(s) IPR003439 ABC transporter-like	At1g65410	NP_001353542.1	1	8	1	0.311	0.00200549	5	1	6	envelope-inner-peripheral-stromal-side	0	0	2	Cp	3	Cp	Cp	Cp	Cp	99.9
Solyc11g069260	ABCI9	Cobalt import ATP-binding protein cbiO 2 (AHRD V1 ***- B6U9M1_MAIZE); contains Interpro domain(s) IPR003439 ABC transporter-like	At4g33460	NP_001353549.1 Ofori et al 2018	1	1	1	0.233	0.0015025	1	0	1	envelope	0	0	3	Cp	4	-	none	Cp	Cp	99.3
Solyc09g091240	CMT1	Chloroplast manganese transporter1, CMT1 (based on Arabidopsis) Predicted membrane protein (Fragment) (AHRD V1 **-- B9GMI0_POPTR); contains Interpro domain(s) IPR001727 Uncharacterised protein family UPF0016	At4g13590	XP_004247813.1	1	1	1	0.233	0.0015025	1	0	1	envelope-inner	7	7	2	Cp	1	Cp	Cp	Cp	Cp	70.7
Solyc04g076050	CUTA	Divalent cation tolerance protein CutA (AHRD V1 *-*- Q3Z664_DEHE1); contains Interpro domain(s) IPR004323 Divalent ion tolerance protein, CutA1	At2g33740	XP_004237976.1	1	9	1	0.931	0.00600357	5	2	7	envelope-inner	1	0	6	S	5	Cp	M	Cp	M	47.6
Solyc01g094290	KEA2	K(+) efflux antiporter 2, chloroplastic (NCBI) Glutathione-regulated potassium-efflux system protein (AHRD V1 *-*- B3CM92_WOLPP); contains Interpro domain(s) IPR004771 K+/H+ exchanger	At4g00630	XP_004229880.1	9	18	9	0.708	0.00456555	5	2	7	envelope-inner-integral	13	14	11	-	5	-	possibly Cp	not Cp	PM	89
Solyc01g105170	-	Copper-exporting P-type ATPase A (AHRD V1 *-*- COPA_STAHJ); contains Interpro domain(s) IPR001757 ATPase, P-type, K/Mg/Cd/Cu/Zn//Ca//H-tRNAansporter	At4g33520	XP_025883792.1	1	7	1	0.259	0.00167017	4	1	5	thylakoid-integral	8	8	15	Cp	3	Cp	Cp	Cp	Cp	99.5
Solyc03g116110	-	Alpha/beta hydrolase fold protein (AHRD V1 ***- B2J569_NOSP7)	At1g74640	XP_004236001.1	4	10	4	0.833	0.00537162	4	3	7	plastid	0	0	2	Cp	3	Cp	Cp	Cp	Cp	95.6
Solyc01g081480	-	Alpha-beta hydrolase super family	At5g17670	XP_004229542.1	2	6	2	0.52	0.00335323	4	3	7	envelope	0	0	3	S	4	Cp	possibly Cp	Cp	Cp	98.2
Solyc03g059180	-	Rhodanese/Cell cycle control phosphatase superfamily protein (TAIR)	At3g59780	XP_010317888.1	1	1	1	0.116	0.000748028	1	0	1	thylakoid	1	4	4	Cp	4	Cp	Cp	Cp	Cp	73.8
Solyc10g076700	-	Rhodanese-like domain-containing protein 10	At3g08920	XP_004249076.1	3	9	3	0.874	0.00563601	4	3	7	thylakoid	0	0	4	Cp	4	Cp	possibly Cp	Cp	Cp	55.2
Solyc06g053140	-	Rhodanese-like domain-containing protein 14, chloroplastic	At4g27700	XP_004240967.1	4	28	4	4.623	0.0298115	5	3	8	thylakoid	0	0	2	Cp	1	Cp	Cp	Cp	Cp	92.9
Solyc10g009570	-	Rhodanese-like domain-containing protein 4	At4g01050	XP_004248078.3	3	4	3	0.35	0.00225698	2	0	2	thylakoid	3	4	3	Cp	1	Cp	possibly M	Cp	Cp	92.89
Solyc01g095670	-	Rhodanese-like domain-containing protein 4 (NCBI)	At4g01050	XP_010326928.1	4	11	4	0.624	0.00402388	5	3	8	thylakoid	0	0	5	Cp	4	-	none	Cp	C	61.5
Solyc04g080390	-	Plasma membrane fusion protein (based on At homolog; BlastP	At5g42765	XP_004238260.1	4	11	4	1.848	0.0119169	4	3	7	thylakoid	0	0	4	Cp	3	Cp	Cp	Cp	Cp	94.9
Solyc03g019680	CBSCBSPB5-like	BS domain containing protein	At5g50640	XP_004234305.1	1	1	1	<0.038	0	1	0	1	-	1	0	2	Cp	2	Cp	none	Cp	Cp	87.6
Solyc03g034170	-	Uncharacterized conserved membrane protein (AHRD V1 *--- A5GSC9_SYNR3). Similar to to At Acclimation of photosynthesis to the environment 1	At5g38660	XP_004234564.1	4	6	4	1.154	0.00744159	3	3	6	thylakoid	2	2	2	M	5	Cp	M	Cp	PM	93
Solyc02g091640	-	Uncharacterized protein	At4g37920	XP_004231977.1	1	3	1	0.105	0.000677094	3	0	3	plastid	0	0	3	Cp	1	Cp	none	Cp	N	69.9
Solyc01g006020	-	Uncharacterized protein	At3g32930	XP_004228682.1	2	6	2	0.425	0.00274062	5	2	7	-	0	0	2	Cp	2	Cp	Cp	Cp	Cp	63.2
Solyc03g097250	-	Uncharacterized protein	At3g02900	NP_001315610.1	1	1	1	0.212	0.00136709	1	0	1	plastid	1	2	3	Cp	3	Cp	Cp	Cp	Cp	99.6
Solyc06g069170	-	Uncharacterized protein	At1g73885	NP_001333824.1	1	7	1	0.585	0.00377238	4	0	4	thylakoid	1	1	2	Cp	4	Cp	Cp	Cp	Cp	53.1
Solyc11g007680	-	Uncharacterized protein	-	XP_004250008.1	2	3	2	3.642	0.0234855	3	0	3	envelope-outer	1	2	1	-	3	Cp	none	Cp	C	86.3
Solyc02g070770	-	Uncharacterized protein At2g34460, chloroplastic (NCBI); NAD-dependent epimerase/dehydratase (AHRD V1 **-- B8HW76_CYAP4); contains Interpro domain(s) IPR016040 NAD(P)-binding domain	At2g34460	XP_004233107.1	7	25	7	2.415	0.0155732	5	3	8	plastoglobules	0	0	1	Cp	4	Cp	possibly Cp	Cp	Cp	83.7
Solyc08g074560	ABC1K1	ABC1-like protein kinase; Uncharacterized aarF domain-containing protein kinase 1 (AHRD V1 *--- ADCK1_CHICK); contains Interpro domain(s) IPR004147 ABC-1	At4g31390	NP_001305094.1	1	1	1	0.061	0.00039336	1	2	3	plastoglobules	0	0	2	Cp	2	Cp	Cp	Cp	C	57.8
Solyc07g006490	-	Unknown Protein (AHRD V1)	At4g28025	XP_004242659.1	1	4	1	0.468	0.00301791	4	1	5	plastid	1	1	1	Cp	4	-	Cp	Cp	Cp	88.1
Solyc09g010120	-	Unknown Protein (AHRD V1)	At2g36145	XP_004246488.1	1	4	1	0.468	0.00301791	3	2	5	thylakoid	0	0	2	Cp	4	Cp	possibly Cp	Cp	Cp	87
Solyc11g065680	-	Unknown Protein (AHRD V1)	At2g01870	XP_004250934.1	1	1	1	0.389	0.00250847	1	0	1	plastid	1	1	1	Cp	3	Cp	possibly Cp	Cp	C	81.4
Solyc08g061810	-	Unknown Protein (AHRD V1)	At2g26340	XP_010325005.1	4	12	4	2.594	0.0167275	5	3	8	thylakoid	0	0	2	S	2	-	none	Cp	Cp	89
Solyc02g090100	-	Unknown Protein (AHRD V1), possibly ycf	-	XP_004232074.1	3	11	3	1.154	0.00744159	5	2	7	thylakoid	0	0	2	Cp	3	Cp	possibly M	Cp	Cp	97
Solyc04g011900	-	Unknown Transmembrane Os04g0639300 protein (Fragment) (AHRD V1 *-*- Q0J9P0_ORYSJ)	At2g21960	XP_004236712.1	1	4	1	0.359	0.00231502	2	0	2	plastid	3	2	1	Cp	3	Cp	possibly Cp	Cp	Cp	99.5
Solyc03g095990	-	Unknown Protein [transmembrane protein [Arabidopsis thalianana], e-value 1e-53]	At3g56010	XP_010318243.1	1	3	1	0.668	0.00430761	2	0	2	plastid	1	1	4	M	2	-	possibly M	Cp	N	83.46
Solyc12g055800	-	V-type Vacuolar ATP synthase subunit A, VHA; -V-type ATP synthase alpha chain IPR005725 ATPase, V1 complex, subunit A	At1g78900	NP_001234281.2	11	31	3	1.61	0.0103821	5	0	5	-	0	0	1	_	1	-	none	Cp	C	99.5
Solyc01g111760	-	V-type ATP synthase beta chain IPR005723 ATPase, V1 complex, subunit B	At4g38510	XP_004231058.1	11	36	1	2.162	0.0139417	5	0	5	-	0	0	3	-	2	-	none	not Cp	C	97.38
Solyc04g007550	-	ATP synthase subunit beta (AHRD V1 ***- O82722_NICSY); contains Interpro domain(s) IPR005722 ATPase, F1 complex, beta subunit	At5g08690	XP_004236964.1	16	136	2	9	0.0580367	4	3	7	-	0	0	2	Cp	4	Cp	M	Cp	M	100
Solyc05g008460	-	ATP synthase subunit beta (AHRD V1 ***- O82722_NICSY); contains Interpro domain(s) IPR005722 ATPase, F1 complex, beta subunit	At5g08690	XP_004238867.1	17	145	3	10.788	0.0695666	5	0	5	-	0	0	1	M	5	Cp	M	Cp	M	100
A Tomato membrane proteins were identified based on empirical evidence (PPDB), based Mercator predictions, or based on the tomato or Arabidopsis literature.
B Proteins were identified by acetone preparations and/or the gel method. For emPAI and Mol% calculations, only the data from the acetone prepartions were used. Proteins identified solely by the gel method have data for the number of peptides, PSMs and unique peptides.
C Names of tomato proteins were based on the literature, NCBI annotation (identified in BlastP searches), and/or SolyGenomics descriptor. In a small number of cases, tomato protein names were assigned based on NCBI annotations and the Arabidopsis homolog.
D Some Sol Genomics descriptors were updated when NCBI annotations and Arabidopsis gene annotations were aligned.
E The number of transmembrane domains were predicted by TMPred, deepTMHMM, and CCTOP. Values from transmembrane domain programs vary significantly.
F Target P's subcellular locations are: chloroplast (Cp), mitochondria (M), secretory (S), and no predicted location is indicated by a dash (-).
G ChloroP was used to predict the presence of a chloroplast transit peptide (Y) and the lack of a predicted transit peptide is indicated with a dash (-).
H Predotar's predicted subcellular locations were: chloroplast/plastid (Cp),endoplasmic reticulum (ER) or mitochondrion (M). For proteins with localization predictions that were less clear, Predotar provided categorized of possibly Cp, M and ER. Proteins with unresolved locations or that did not have a homolog detected by Predotar are indicated with a dash (-).
I WoLF PSORT's and YLoc's predicted subcellular locations were: chloroplast/plastid (Cp), cytosol (C), cytoskeleton (Cy), endoplasmic reticulum (ER), extracellular (EX), golgi apparatus (G), mitochondrion (M), nucleus (N), peroxisomes (P), plasma membrance (PM), and vacuole (V). Proteins with no chloroplast location in WoLF PSORT are indicated by not Cp.The number of proteins predicted to be in t…

## Sheet: Table S4B- Lumen
Table S4B. Tomato lumenal proteinsA
Functional Class	Gene and protein descriptors					ProteomicsB					Number of times detected			Mapman		Database locatations			Algorithm-predicted protein locations
	Tomato Gene ID	Protein NameC	Descriptor D	Arabidopsis homolog	Criteria of protein nameC	Peptides	PSMs	Unique Peptides	emPAI	Mol %	Acetone samples	Gel samples	Total	Bin code	Bin Descriptor	PPDB location	plprot	SUBA4	TargetP (v2)F	PredSLF	TargetP (v1)G	TargetP (v1) TP length	TargetP (v1) Reliability class	ChloroP Transit peptideH	PredotarI	WoLF PSORTJ	YLocJ	YLoc % confidence
Defense	Solyc08g074620	PPO-E	Polyphenol oxidase (AHRD V1 ***- Q41428_SOLTU); contains Interpro domain(s) IPR016213 Polyphenol oxidase, plant	-	NP_001318057.1	31	853	3	233.623	1.50652	5	1	6	35.2	not assigned.unknown	-	-	-	TH	Y	Cp	50	1	Cp	Cp	Cp	Cp	100
	Solyc08g074680	PPO-A	Polyphenol oxidase (AHRD V1 *-*- Q41428_SOLTU); contains Interpro domain(s) IPR002227 Tyrosinase	-	XP_004246029.3	20	115	18	1.886	0.0121619	5	0	5	35.2	not assigned.unknown	-	-	-	TH	Y	Cp	46	2	Cp	Cp	Cp	Cp	100
Proteolysis	Solyc12g097030	CTPA2	Carboxyl-terminal processing protease (AHRD V1 ***- Q5N158_SYNP6); contains Interpro domain(s) IPR005151 Peptidase S41	At4G17740	XP_004253014.1	18	76	18	3.758	0.0242335	5	3	8	29.5.5	protein.degradation.serine protease	thylakoid-peripheral-lumenal-side	-	Cp	TH	-	Cp	46	4	Cp	Cp	Cp	C	60.4
	Solyc02g071190	CTPA1	Carboxyl-terminal-processing protease (AHRD V1 ***- B6SPN8_MAIZE); contains Interpro domain(s) IPR004447 Peptidase S41A, C-terminal protease	At5G46390	XP_010316905.1	14	48	14	5.062	0.0326424	5	3	8	29.5	protein.degradation	thylakoid-peripheral-lumenal-side	-	Cp	TH	-	Cp	63	2	Cp	none	Cp	Cp	70.5
	Solyc03g059260	CTPA3	Carboxyl-terminal-processing protease (AHRD V1 ***- B6T6L2_MAIZE); contains Interpro domain(s) IPR004447 Peptidase S41A, C-terminal protease	At3G57680	XP_010317889.1	2	4	2	0.389	0.00250847	4	0	4	29.5	protein.degradation	thylakoid-peripheral-lumenal-side	-	-	TH	Y	Cp	25	5	-	none	Cp	C	50.9
	Solyc02g086830	DEG1	DegP Protease 1; Protease Do-like (S2 serine-type protease) (AHRD V1 **** Q7UQ70_RHOBA); contains Interpro domain(s) IPR001254 Peptidase S1 and S6, chymotrypsin/Hap	At3G27925	XP_004232295.1	13	137	13	11.915	0.0768341	5	3	8	29.5.5	protein.degradation.serine protease	-	-	-	TH	Y	Cp	53	2	Cp	Cp	Cp	Cp	99.9
	Solyc08g048550	DEG5	DegP Protease 5; Protease Do-like (S2 serine-type protease) (AHRD V1 **** A6CGY1_9PLAN); contains Interpro domain(s) IPR001254 Peptidase S1 and S6, chymotrypsin/Hap	At4G18370	XP_004244974.1	4	29	4	2.415	0.0155732	5	3	8	29.5	protein.degradation	thylakoid-peripheral-lumenal-side	Cp	Cp	TH	-	Cp	41	5	Cp	Cp	Cp	Cp	99.4
	Solyc02g067360	DEG8	DegP Protease 8; Protease Do-like (S2 serine-type protease) (AHRD V1 **** Q7UQ70_RHOBA); contains Interpro domain(s) IPR001254 Peptidase S1 and S6, chymotrypsin/Hap	At5G39830	XP_004233360.1	9	30	9	3.437	0.0221636	5	3	8	29.5.5	protein.degradation.serine protease	thylakoid-peripheral-lumenal-side	Cp	Cp	OTHER	Y	Cp	60	5	Cp	Cp	Cp	C	69.4
Protein folding	Solyc08g006540	FKBP13	Peptidyl-prolyl cis-trans isomerase IPR001179 Peptidyl-prolyl cis-trans isomerase, FKBP-type	At5G45680	Waseem et al 2018	6	38	6	2.831	0.0182558	5	3	8	29.8	protein.assembly and cofactor ligation	thylakoid-peripheral-lumenal-side	Cp	Cp	OTHER	-	_	-	5	-	possibly M	Cp	Cp	77.31
	Solyc04g054520	FKBP16-2	Peptidyl-prolyl cis-trans isomerase (AHRD V1 *-*- D8PA41_9BACT); contains Interpro domain(s) IPR001179 Peptidyl-prolyl cis-trans isomerase, FKBP-type	At4G39710	Waseem et al 2018	4	7	4	4.179	0.0269484	4	3	7	29.6	protein.folding	thylakoid-peripheral-lumenal-side	Cp	Cp	TH	Y	Cp	51	5	Cp	Cp	Cp	Cp	85.5
	Solyc04g015040	FKBP16-3	Peptidyl-prolyl cis-trans isomerase (AHRD V1 ***- C1FEU4_9CHLO); contains Interpro domain(s) IPR001179 Peptidyl-prolyl cis-trans isomerase, FKBP-type	At2G43560	Waseem et al 2018	6	93	6	15.681	0.101119	5	3	8	29.6	protein.folding	thylakoid-peripheral-lumenal-side	Cp	Cp	TH	-	Cp	53	2	Cp	Cp	Cp	ER	66.4
	Solyc09g008650	FKBP16-4	Peptidyl-prolyl cis-trans isomerase (AHRD V1 ***- B8HUH5_CYAP4); contains Interpro domain(s) IPR001179 Peptidyl-prolyl cis-trans isomerase, FKBP-type	At3G10060	Waseem et al 2018	1	1	1	0.212	0.00136709	1	0	1	29.6	protein.folding	thylakoid-peripheral-lumenal-side	Cp	Cp	TH	-	M	29	5	Cp	possibly Cp	Cp	Cp	100
	Solyc02g069130	FKBP17-1	Peptidyl-prolyl cis-trans isomerase (AHRD V1 *-*- B1WW43_CYAA5); contains Interpro domain(s) IPR001179 Peptidyl-prolyl cis-trans isomerase, FKBP-type	At4G19830	Waseem et al 2018	3	8	3	1.683	0.0108529	5	3	8	29.6	protein.folding	-	-	-	TH	-	M	41	5	Cp	none	Cp	ER	98.4
	Solyc03g119150	FKBP17-3	Peptidyl-prolyl cis-trans isomerase (AHRD V1 *-*- B4VX45_9CYAN); contains Interpro domain(s) IPR001179 Peptidyl-prolyl cis-trans isomerase, FKBP-type	At1G18170	Waseem et al 2018	2	2	2	0.668	0.00430761	2	3	5	29.6	protein.folding	thylakoid-peripheral-lumenal-side	Cp	Cp	CH	-	Cp	73	1	Cp	Cp	Cp	Cp	94.4
	Solyc04g082660	FKBP18	Peptidyl-prolyl cis-trans isomerase (AHRD V1 *-*- A8YBJ2_MICAE); contains Interpro domain(s) IPR001179 Peptidyl-prolyl cis-trans isomerase, FKBP-type	At1G20810	Waseem et al 2018	3	7	3	0.778	0.00501695	4	2	6	29.6	protein.folding	thylakoid-peripheral-lumenal-side	Cp	Cp	TH	-	Cp	60	1	Cp	Cp	Cp	Cp	99.6
	Solyc11g033284	FKBP19A	Peptidyl-prolyl cis-trans isomerase (AHRD V1 *-*- Q8DJW8_THEEB); contains Interpro domain(s) IPR001179 Peptidyl-prolyl cis-trans isomerase, FKBP-type	At5G13410	Waseem et al 2018	3	19	3	6.197	0.0399615	5	0	5	29.6	protein.folding	thylakoid-peripheral-lumenal-side	Cp	Cp	TH	Y	Cp	77	1	Cp	Cp	Cp	Cp	98.31
	Solyc10g039270	FKBP20-2	Peptidyl-prolyl cis-trans isomerase (AHRD V1 *-** C6E462_GEOSM); contains Interpro domain(s) IPR001179 Peptidyl-prolyl cis-trans isomerase, FKBP-type	At3G60370	Waseem et al 2018	5	13	5	1.154	0.00744159	5	2	7	29.6	protein.folding	thylakoid-peripheral-lumenal-side	Cp	Cp	TH	-	Cp	38	5	Cp	possibly M	Cp	Cp	90.3
	Solyc02g086910	CYP38	Peptidyl-prolyl cis-trans isomerase cyclophilin-type (AHRD V1 ***- A8IRU6_CHLRE); contains Interpro domain(s) IPR002130 Peptidyl-prolyl cis-trans isomerase, cyclophilin-type	At3G01480	XP_004232290.1	13	194	13	19.691	0.126978	5	3	8	29.6	protein.folding	thylakoid-peripheral-lumenal-side	Cp	Cp	TH	Y	Cp	45	3	Cp	Cp	Cp	Cp	98.9
	Solyc01g009990	PNSL5 CYP20-2	Photosynthetic NDH subunit of lumenal location 5; Peptidyl-prolyl cis-trans isomerase (AHRD V1 ***- B9RMA5_RICCO); contains Interpro domain(s) IPR002130 Peptidyl-prolyl cis-trans isomerase, cyclophilin-type	At5G13120	XP_004228428.1	10	191	10	30.623	0.197473	5	3	8	31.3.1	cell.cycle.peptidylprolyl isomerase	thylakoid-peripheral-lumenal-side	Cp	Cp	CH	-	Cp	67	1	Cp	Cp	Cp	Cp	99.9
	Solyc12g013580	CYP37	Peptidyl-prolyl cis-trans isomerase cyclophilin-type (AHRD V1 ***- A8INE5_CHLRE); contains Interpro domain(s) IPR002130 Peptidyl-prolyl cis-trans isomerase, cyclophilin-type	At3G15520	XP_004251848.1	7	30	7	1.683	0.0108529	5	3	8	31.3.1	cell.cycle.peptidylprolyl isomerase	thylakoid-peripheral-lumenal-side	Cp	Cp	TH	-	Cp	46	3	Cp	Cp	Cp	Cp	100
Cytb6/f complex	Solyc12g005630	PETC	Cytochrome b6-f complex iron-sulfur subunit (AHRD V1 ***- A9PEX3_POPTR); contains Interpro domain(s) IPR005805 Rieske iron-sulphur protein, C-terminal	At4G03280	NP_001304899.1	3	44	3	1.61	0.0103821	5	3	8	1.1.3	PS.lightreaction.cytochrome b6/f	thylakoid-peripheral-lumenal-side	-	Cp	CH	-	Cp	25	3	Cp	Cp	Cp	Cp	99.9
	Solyc04g082010	PETE	Plastocyanin (AHRD V1 ***- Q0W9E5_SOLCO); contains Interpro domain(s) IPR000923 Blue (type 1) copper domain	At1G20340	NP_001296192.1	1	44	1	5.31	0.0342416	5	3	8	1.1.5.1	PS.lightreaction.other electron carrier (ox/red).plastocyanin	thylakoid-peripheral-lumenal-side	-	Cp	TH	Y	Cp	62	1	Cp	Cp	Cp	Cp	100
	Solyc02g068930	PETJ	Cytochrome c6 (AHRD V1 ***- D7MKY9_ARALY); contains Interpro domain(s) IPR003088 Cytochrome c, class I	At5g45040	XP_004233233.1	2	10	2	0.425	0.00274062	5	2	7	1.1.5	PS.light reactions	thylakoid-peripheral-lumenal-side	-	-	TH	-	Cp	4	4	-	none	Cp	Cp	99.3
NAD(P)H complex	Solyc10g054420	PNSL1	Photosynthetic NDH subunit of lumenal location 1; Photosystem II oxygen evolving complex protein PsbP-like (AHRD V1 ***- A0YXJ6_LYNSP); contains Interpro domain(s) IPR002683 Photosystem II oxygen evolving complex protein PsbP	At2G39470	XP_004248685	3	7	3	1.154	0.00744159	4	3	7	1.1.1.2	PS.lightreaction.photosystem II.PSII polypeptide subunits	thylakoid-peripheral-lumenal-side	Cp	Cp	TH	-	Cp	32	1	Cp	Cp	Cp	Cp	100
	Solyc05g007780	PNSL2	Photosynthetic NDH subunit of lumenal location 2; Oxygen evolving enhancer protein-like 3 (AHRD V1 ***- B6SZC8_MAIZE); contains Interpro domain(s) IPR008797 Photosystem II oxygen evolving complex protein PsbQ	At1G14150	XP_010320690.1	1	6	1	0.778	0.00501695	3	3	6	1.1.1.2	PS.lightreaction.photosystem II.PSII polypeptide subunits	-	-	-	TH	-	Cp	75	4	Cp	possibly Cp	Cp	M	84.1
	Solyc10g006530	PNSL3	Photosynthetic NDH subunit of lumenal location 3; Oxygen evolving enhancer 3 family protein (AHRD V1 *-*- D7L9Q0_ARALY); contains Interpro domain(s) IPR008797 Photosystem II oxygen evolving complex protein PsbQ-like (similar to AtPQL1)	At3G01440	XP_004248376.1	2	4	2	1.512	0.00975016	4	1	5	1.1.1.2	PS.lightreaction.photosystem II.PSII polypeptide subunits	thylakoid-peripheral-lumenal-side	Cp	Cp	OTHER	Y	Cp	67	4	-	none	Cp	Cp	99.3
Photosystem I	Solyc08g013670	PSAN	Photosystem I reaction center subunit (AHRD V1 ***- D2K7Z2_TOBAC); contains Interpro domain(s) IPR008796 Photosystem I reaction centre subunit N	At5G64040	NP_001316061.1	1	16	1	0.334	0.00215381	4	3	7	1.1.2.2	PS.lightreaction.photosystem I.PSI polypeptide subunits	thylakoid-peripheral-lumenal-side	-	Cp	TH	Y	Cp	72	1	Cp	Cp	Cp	Cp	100
Photosystem II	Solyc02g065400	PSBO-1 OEE1-1	Oxygen-evolving enhancer protein 1 of photosystem II (AHRD V1 ***- A8J0E4_CHLRE); contains Interpro domain(s) IPR002628 Photosystem II manganese-stabilizing protein PSBO	At3G50820	SCL58735.1	15	300	3	15.681	0.101119	5	3	8	1.1.1.2	PS.lightreaction.photosystem II.PSII polypeptide subunits	thylakoid-peripheral-lumenal-side	Cp	Cp	TH	-	Cp	27	4	Cp	Cp	Cp	Cp	100
	Solyc02g090030	PSBO-1 OEE1-1	Oxygen-evolving enhancer protein 1 of photosystem II (AHRD V1 ***- A8J0E4_CHLRE); contains Interpro domain(s) IPR002628 Photosystem II manganese-stabilizing protein PSBO	At3G50820	NP_001308345.1	15	309	3	13.125	0.0846368	5	3	8	1.1.1.2	PS.lightreaction.photosystem II.PSII polypeptide subunits	thylakoid-peripheral-lumenal-side	Cp	Cp	TH	Y	Cp	43	3	Cp	Cp	Cp	Cp	100
	Solyc07g044860	PSBP OEE2	Oxygen-evolving enhancer protein 2, chloroplastic (AHRD V1 ***- PSBP_SOLLC); contains Interpro domain(s) IPR002683 Photosystem II oxygen evolving complex protein PSBP	At1G06680	NP_001234109.2	13	484	13	35.517	0.229032	5	3	8	1.1.1.2	PS.lightreaction.photosystem II.PSII polypeptide subunits	thylakoid-peripheral-lumenal-side	Cp	Cp	TH	Y	Cp	36	3	Cp	Cp	Cp	Cp	100
	Solyc02g079950	PSBQ OEE3	Oxygen-evolving enhancer protein 3 (AHRD V1 ***- Q7Y1T5_PEA); contains Interpro domain(s) IPR008797 Photosystem II oxygen evolving complex protein PSBQ	At4G05180	NP_001234528.1	18	199	18	99	0.638403	5	3	8	1.1.1.2	PS.lightreaction.photosystem II.PSII polypeptide subunits	thylakoid-peripheral-lumenal-side	Cp	Cp	TH	Y	Cp	49	2	Cp	Cp	Cp	Cp	100
Photosystem assembly, stability, repair and unknown functions	Solyc12g005180	LCNP	Chloroplast lipocalin (AHRD V1 ***- Q38JB4_SOLTU); contains Interpro domain(s) IPR013208 Lipocalin-like; similar to AtCHL (chloroplast lipocalin)/LCNP (lipocalin in the plastid)	At3G47860	Wahyudi et al 2019	8	37	8	6.017	0.0388007	5	3	8	20.2	stress.abiotic	thylakoid	-	Cp	TH	-	Cp	28	4	Cp	Cp	Cp	C	55.2
	Solyc02g014150	HCF136	Photosystem II stability/assembly factor Ycf48-like protein (AHRD V1 **-- B0C6T3_ACAM1); contains Interpro domain(s) IPR016705 Photosystem II stability/assembly factor, HCF136	At5G23120	XP_004231481.1	12	223	12	12.111	0.078098	5	3	8	1.1.1.3	PS.lightreaction.photosystem II.biogenesis	thylakoid-peripheral-lumenal-side	-	Cp	TH	Y	Cp	34	2	Cp	none	Cp	Cp	94.7
	Solyc02g083270	LTO1 VKOR	Lumen Thiol Oxidoreductase 1, Vitamin K epoxide reductase (AHRD V1 **-- B4AXQ4_9CHRO); contains Interpro domain(s) IPR012932 Vitamin K epoxide reductase	At4G35760	NP_001298273.1 At4G35760	3	5	3	1.154	0.00744159	2	0	2	35.2	not assigned.unknown	-	-	-	CH	-	Cp	47	1	Cp	Cp	Cp	Cp	99.9
	Solyc01g106090	PPD1 PSB27-like	PsbP domain protein, PPD1, PSB27-like, Photosystem II oxygen evolving complex protein PSBP (AHRD V1 *-*- B8HJK6_CYAP4); contains Interpro domain(s) IPR002683 Photosystem II oxygen evolving complex protein PSBP	At4G15510	XP_004230618.1	11	68	11	6.079	0.0392005	5	3	8	1.1.1.2	PS.lightreaction.photosystem II.PSII polypeptide subunits	thylakoid-peripheral-lumenal-side	Cp	Cp	MT	-	M	80	3	-	none	Cp	Cp	100
	Solyc04g009420	PPD2	Photosystem II oxygen evolving complex protein PSBP (AHRD V1 ***- Q11A16_TRIEI); contains Interpro domain(s) IPR016123 Mog1/PSBP, alpha/beta/alpha sandwich	At2G28605	XP_004236825.1	9	29	9	9	0.0580367	5	3	8	1.1.1.2	PS.lightreaction.photosystem II.PSII polypeptide subunits	thylakoid-peripheral-lumenal-side	-	Cp	TH	-	Cp	42	2	Cp	possibly Cp	Cp	Cp	99.7
	Solyc12g094720	PPD3	PsbP domain-containing protein 3, chloroplastic (AHRD V1 ***- PPD3_ARATH); contains Interpro domain(s) IPR016123 Mog1/PSBP, alpha/beta/alpha sandwich	At1G76450	XP_004253115.1	7	92	7	9	0.0580367	5	3	8	1.1.1.2	PS.lightreaction.photosystem II.PSII polypeptide subunits	thylakoid-peripheral-lumenal-side	-	Cp	TH	Y	Cp	54	2	Cp	Cp	Cp	Cp	100
	Solyc04g064670	PPD4	Thylakoid lumenal 19 kDa protein, chloroplastic (AHRD V1 *-*- TL19_ARATH); contains Interpro domain(s) IPR016123 Mog1/PsbP, alpha/beta/alpha sandwich	At1G77090	XP_004237726.1	7	46	7	7.111	0.0458554	5	3	8	1.1.1.2	PS.lightreaction.photosystem II.PSII polypeptide subunits	thylakoid-peripheral-lumenal-side	Cp	Cp	TH	Y	Cp	43	3	Cp	Cp	Cp	Cp	100
	Solyc08g067840	PPD5	PsbP domain-containing protein 5, chloroplastic (AHRD V1 **-- PPD5_ARATH); contains Interpro domain(s) IPR016123 Mog1/PsbP, alpha/beta/alpha sandwich	At5G11450	XP_004245232.1	6	23	6	1.894	0.0122135	5	3	8	1.1.1.2	PS.lightreaction.photosystem II.PSII polypeptide subunits	thylakoid-peripheral-lumenal-side	Cp	Cp	TH	Y	Cp	52	2	Cp	Cp	Cp	Cp	98.8
	Solyc06g065490	PPD6	PsbP domain-containing protein 6, chloroplastic (AHRD V1 ***- PPD6_ARATH); contains Interpro domain(s) IPR016123 Mog1/PsbP, alpha/beta/alpha sandwich	At3G56650	XP_004241815.1	4	68	4	2.511	0.0161922	5	3	8	1.1.1.2	PS.lightreaction.photosystem II.PSII polypeptide subunits	thylakoid-peripheral-lumenal-side	Cp	Cp	TH	-	Cp	56	2	Cp	Cp	Cp	Cp	100
	Solyc03g114930	PPL1	Photosystem II reaction center PsbP family protein; Photosystem II oxygen evolving complex protein PsbP (AHRD V1 ***- A0ZMM6_NODSP); contains Interpro domain(s) IPR016123 Mog1/PsbP, alpha/beta/alpha sandwich	At3G55330	NP_001334266.1	7	49	7	5.579	0.0359763	5	3	8	1.1.1.2	PS.lightreaction.photosystem II.PSII polypeptide subunits	thylakoid-peripheral-lumenal-side	Cp	Cp	TH	-	Cp	46	4	Cp	Cp	Cp	Cp	100
	Solyc01g006130	PSA2	Photosystem I assembly 2, chloroplastic (NCBI) (AHRD V1 *-*- Q010T6_OSTTA); contains Interpro domain(s) IPR001305 Heat shock protein dnaJ, cysteine-rich region; PSII assembly	At2g34860	XP_004228692.1 Walbraun et al 1994	2	2	2	-	0	0	1	1	29.6	protein.folding	thylakoid-peripheral-lumenal-side	Cp	Cp	TH	-	Cp	39	1	Cp	Cp	Cp	C	72.1
	Solyc07g054290	PSB27-H1	Photosystem II repair protein PSB27-H1; Photosystem II family protein (AHRD V1 *-*- D7KCG4_ARALY)	At1G03600	XP_004243333.3	3	9	3	1.512	0.00975016	5	3	8	1.1.1.2	PS.lightreaction.photosystem II.PSII polypeptide subunits	thylakoid-peripheral-lumenal-side	-	Cp	TH	Y	Cp	88	2	Cp	M	Cp	Cp	96.5
	Solyc09g076030	PSB27-H2	Homolog to AtPsb27 homolog involved in photosystem II biogenesis. LOW PSII ACCUMULATION 19, LPA19, PSB27-H2 Chromosome 04 contig 1 D sequence (AHRD V1 *-*- Q01AH6_OSTTA)	At1G05385	XP_004237942.1	8	37	8	4.878	0.0314559	5	3	8	1.1.1.2	PS.lightreaction.photosystem II.PSII polypeptide subunits	thylakoid-peripheral-lumenal-side	-	Cp	TH	Y	Cp	37	3	Cp	Cp	Cp	C	38
	Solyc09g064500	PSB28	Photosystem II reaction center psb28 protein (AHRD V1 ***- C6SZM2_SOYBN); contains Interpro domain(s) IPR005610 Photosystem II protein Psb28, class 1	At4G28660	XP_004247130.1	4	21	4	3.217	0.0207449	4	2	6	1.1.1.2	PS.lightreaction.photosystem II.PSII polypeptide subunits	thylakoid-peripheral-lumenal-side	-	Cp	CH	-	Cp	64	2	Cp	Cp	Cp	Cp	100
	Solyc06g076480	TL15-1	Pentapeptide repeat-containing protein (AHRD V1 *-*- D8G5N8_9CYAN); contains Interpro domain(s) IPR001646 Pentapeptide repeat	At2G44920	XP_010322337.1	4	27	4	1.154	0.00744159	5	3	8	35.1	not assigned.no ontology	thylakoid-peripheral-lumenal-side	Cp	Cp	TH	Y	Cp	61	1	Cp	Cp	Cp	Cp	100
	Solyc10g084040	TL15-2	Thylakoid lumen 15.0-kDa protein (Fragment) (AHRD V1 **-- B8C1L2_THAPS)	At5G52970	XP_004249484.1	7	44	7	7.111	0.0458554	5	3	8	35.1	not assigned.no ontology	thylakoid-peripheral-lumenal-side	-	Cp	TH	Y	Cp	73	1	Cp	Cp	Cp	Cp	99.8
	Solyc12g009600	TL16.5 MPH2	Thylakoid lumenal protein 16.5 kD; possibly, MPH2, Maintenance of photosystem II under high light 2. MPH2 is a green lineage-specific thylakoid lumen protein required for photosynthetic acclimation of PSII to stressful light conditions; (AHRD V1 ***- B6SU36_MAIZE)	At4G02530	XP_004251724.1	11	85	11	10.938	0.0705339	5	3	8	35.1	not assigned.no ontology	thylakoid-peripheral-lumenal-side	-	Cp	TH	Y	Cp	26	2	Cp	Cp	Cp	N	44.8
	Solyc03g082890	TL17.4	Thylakoid lumenal 17.4 kDa protein , Pentapeptide repeat protein (AHRD V1 *-*- B4WQI2_9SYNE); contains Interpro domain(s) IPR001646 Pentapeptide repeat	At5G53490	XP_004234987.1	7	39	7	3.924	0.025304	5	3	8	35.1	not assigned.no ontology	thylakoid-peripheral-lumenal-side	Cp	Cp	TH	Y	M	65	5	-	possibly M	Cp	Cp	100
	Solyc03g019660	TL17.9	Thylakoid lumenal 17.9 kDa protein, chloroplastic (AHRD V1 ***- TL1Y_ARATH)	At4G24930	XP_004234307.1	6	29	6	6.499	0.0419089	5	2	7	35.1	not assigned.no ontology	thylakoid-peripheral-lumenal-side	-	Cp	TH	-	Cp	49	5	Cp	Cp	Cp	Cp	99.6
	Solyc01g098640	TLP18.3	Thylakoid lumenal 18.3, UPF0603 protein At1g54780, chloroplastic (AHRD V1 **-- U603_ARATH); contains Interpro domain(s) IPR007621 Protein of unknown function DUF477	At1G54780	XP_004230168.1	10	34	10	5.31	0.0342416	5	3	8	35.1	not assigned.no ontology	thylakoid-peripheral-lumenal-side	-	Cp	TH	Y	Cp	37	1	Cp	Cp	Cp	Cp	99.7
	Solyc01g087040	TL19	Thylakoid lumenal 19 kDa protein, chloroplastic (AHRD V1 ***- TL19_ARATH); contains Interpro domain(s) IPR016123 Mog1/PsbP, alpha/beta/alpha sandwich	At3G63540	XP_004229619.1	9	122	9	315.228	2.03275	5	3	8	35.2	not assigned.unknown	-	-	-	CH	Y	Cp	49	1	Cp	Cp	Cp	Cp	93.9
	Solyc08g079110	TL20.3	Pentapeptide repeat (AHRD V1 *-*- Q4C7L8_CROWT); contains Interpro domain(s) IPR001646 Pentapeptide repeat	At1G12250	P_004245736.1	9	74	9	6.356	0.0409868	5	3	8	35.1.5	not assigned.no ontology.pentatricopeptide (PPR) repeat-containing protein	thylakoid-peripheral-lumenal-side	Cp	Cp	TH	Y	Cp	36	2	-	Cp	Cp	Cp	100
	Solyc04g074640	TL29	Thylakoid lumenal 29 kDa protein	At4G09010	XP_004237942.1	8	34	8	2.594	0.0167275	5	3	8	21.2.1	redox.ascorbate and glutathione.ascorbate	-	-	-	TH	Y	Cp	35	3	Cp	Cp	Cp	Cp	100
Xanthophyll synthesis	Solyc04g051610	VDE-like	VDE-like. Violaxanthin de-epoxidase-related protein (AHRD V1 ***- A8J136_CHLRE)	At2g21860	XP_004237473.1	1	1	1	0.166	0.00107045	1	0	1	16.1.4.21	secondary metabolism.isoprenoids.carotenoids.violaxanthin de-epoxidase	plastid	-	Cp	TH	Y	-	-	5	Cp	Cp	Cp	Cp	89.6
	Solyc04g050930	VDE1	Violaxanthin de-epoxidase	At1G08550	NP_001234610.2	17	98	17	5.579	0.0359763	5	3	8	16.1.4.21	secondary metabolism.isoprenoids.carotenoids.violaxanthin de-epoxidase	thylakoid-peripheral-lumenal-side	-	Cp	TH	-	Cp	63	4	-	Cp	Cp	C	83
unknown	Solyc05g012600	-	Unknown Protein (AHRD V1)	At2G03420	XP_004239076.1	1	4	1	0.259	0.00167017	4	0	4	35.2	not assigned.unknown	-	-	-	TH	Y	Cp	57	2	Cp	possibly Cp	Cp	Cp	99.4
	Solyc09g005740	-	Chloroplast lumen common family protein	At2g37400	XP_004246742.1	7	30	7	1.683	0.0108529	5	3	8	35.1	not assigned.no ontology	plastid	Cp	Cp	TH	-	M	58	5	Cp	Cp	Cp	C	95.2
	Solyc12g019550	-	Unknown Protein (AHRD V1)	At1G21500E	XP_004252001.1	2	4	2	2.162	0.0139417	3	0	3	35.2	not assigned.unknown	-	-	-	TH	Y	Cp	67	3	Cp	Cp	Cp	Cp	90.6
A Tomato lumenal proteins were identified based on empirical evidence (PPDB) or based on lumenal localization predicted by both PredSL and TargetP version 2. One protein was inferred by putative function (Vde1-like). The SolGenomics ID for FKB19 (in ITAG1.2) was changed to Solyc11g033284.1.1 (ITAG4); see Table S2C.
B Proteins were identified by acetone preparations and/or the gel method. For emPAI and Mol% calculations, only the data from the acetone prepartions were used. Proteins identified solely by the gel method have data for the number of peptides, PSMs and unique peptides.
C Names of tomato proteins were based on the literature and NCBI annotation (identified in BlastP searches). In a small number of cases, tomato protein names were assigned based on NCBI annotations and the Arabidopsis homolog.
D Some Sol Genomics descriptors were updated when NCBI annotations and Arabidopsis gene annotations were aligned.
E Solyc12g019550 has similarity to the hypothetical protein AT1G21500, which is predicted is lumenal (Peltier et al 2002; Schubert et al 2002).
F Target P version 2.0 and PredSL were used to predict presence of a thylakoid lumen composite transit peptide. TargetP predicted presence of thylakoid lumen composite transit peptide (TH), chloroplast transit peptide (CH), or absence of a targeting signal (OTHER). PredSL predicted presence (Y) or absence (-) of a thylakoid lumen composite transit peptide.
G Target P's subcellular locations are: chloroplast (Cp), mitochondria (M), secretory (S), and no predicted location is indicated by a dash (-).
H ChloroP was used to predict the presence of a chloroplast transit peptide (Y) and the lack of a predicted transit peptide is indicated with a dash (-).
I Predotar's predicted subcellular locations were: chloroplast/plastid (Cp),endoplasmic reticulum (ER) or mitochondrion (M). For proteins with localization predictions that were less clear, Predotar provided categorized of possibly Cp, M and ER. Proteins with unresolved locations or that did not have a homolog detected by Predotar are indicated with a dash (-).
J WoLF PSORT's and YLoc's predicted subcellular locations were: chloroplast/plastid (Cp), cytosol (C), cytoskeleton (Cy), endoplasmic reticulum (ER), extracellular (EX), golgi apparatus (G), mitochondrion (M), nucleus (N), peroxisomes (P), plasma membrance (PM), and vacuole (V). Proteins with no chloroplast location in WoLF PSORT are indicated by not Cp.The number of proteins predicted to be in t…

## Sheet: Table S4c-top At23
Table S4C. Twenty-three most abundant Arabidopsis stromal proteins with tomato stromal proteome homologs
Arabidopsis				Tomato
Locus A	Protein Name	Descriptor	Rank (Normalized concentration)B	Rank (Mol %)C	Gene IDD	Protein NameE	Mol %
Atcg00490	RBCL	RuBisCo large subunit	1	2	544163621	RBCL	10.4118
At1g67090	RBCS paralogsF	RBCS-4 and other paralogues 1–3	2	113,140 & 116	RBCS paralogs	RBCS3B, RBCS2 & RBCS1	0.228523
At5g35630	GS2	Glutamine synthetase	3	28	Solyc01g080280	GS2	0.400427
At3g62030	CYP20-3, ROC4G	Peptidylprolyl isomerase ROC4	4	-	-	-	-
At2g21170	TPI-1	Triosephosphate isomerase	5	75	Solyc01g111120	pdTPI-2A	0.132478
At3g60750	TKL1	Transketolase	6	39	Solyc10g018300	TKL1	0.292866
At3g01500	BCA1	Carbonic anhydrase	7	38	Solyc02g086820	CA1	0.316745
At2g21330	FBA1H	Fructose-bisphosphate aldolase 1	8	85	Solyc01g110360	FBA1	0.122219
At3g12780	PGK1I	Phosphoglycerate kinase-1	9	34	Solyc07g066610	cpPGK1	0.342526
At3g11630	2-CysPRXA	2-Cys peroxiredoxin A	10	263	Solyc10g082030	2-CYS-Prx1	0.0399615
At1g56190	PGK2I	Phosphoglycerate kinase-1	11	34	Solyc07g066610	cpPGK1	0.342526
At5g06290	2-CysPRXB	2-Cys peroxiredoxin B	12	147	Solyc01g007740	2-CYS-Prx2	0.0705339
At5g20720	CPN20 (CPN21)	Chaperonin 20	13	189	Solyc12g009250	CPN20	0.0580367
At3g04790	EMB3119	Ribose-5-phosphate isomerase (RPI), type A	14	53	Solyc01g097460	RPI3	0.216354
At3g26650	GAPA-1	Glyceraldehyde-3-phosphate dehydrogenase A-1	15	46	Solyc04g009030	GAPA-1	0.250273
At1g12900	GAPA-2	Glyceraldehyde-3-phosphate dehydrogenase A-2	16	36	Solyc02g020940	GAPA-2	0.316745
At3g55800	SBPASE	Sedoheptulose-bisphosphatase	17	76	Solyc05g052600	SBPase	0.132478
At4g38970	FBA2	Fructose-bisphosphate aldolase 2	18	96	Solyc02g062340	FBA2	0.115796
At1g42970	GAPB	Glyceraldehyde-3-phosphate dehydrogenase B	19	81	Solyc12g094640	GAPB	0.132478
At2g39730	RCA	Rubisco activase	20	13	Solyc10g086580	RCA2	1.16934
At4g20360	EF-Tu, SVR11	Elongation factor-Tu	21	11	Solyc06g071790	EF-TuB	1.33521
At3g45140	LOX2	Lipoxygenase 2	22	105	Solyc01g006560	TomLoxF	0.105124
At4g24280	cpHSC70-1J	Chloroplast heat shock protein 70-1	23	33	Solyc01g103450	HSC70-2	0.374517
AThe top 23 Arabidopsis stromal proteins identified by Peltier et al (2006) are shown. The ranking of tomato homologs within the stromal proteome are provided.
B The normalized ranking of the top 23 stromal proteins from the Supplemental Table from Peltier et al (2006).
C The mol % of tomato proteins was calculated as described in Materials and Methods and can be found in Table S2. The Mol% for the sum of the three tomato proteins is 0.228% ranking the pool in the 51st position (See Table 2).
D Gene IDs are from Sol Genomics database or NCBI.
E Names of tomato genes/proteins were curated from the literature, Sol Genomics data base, NCBI accessions, and were guided by names of Arabidopsis homologs (Table S2).
F Four Arabidopsis genes encode the small subunit of RuBisCo (At5g38410, At5g38420, At5g38430, and At1g67090). Due to their high sequence identity, Peliter et al could not distinguish between the different paralogs and their relative abundance was grouped. Here, the three RBCS proteins [RBCS3A (Solyc02g085950), RBCS2A (Solyc03g034220), and RBCS1 (Solyc02g063150)] that ranked 113, 140, and 116, re…
G At3g62030 encodes CYP20-3 (ROC4). Reciprocal BLASTP searches indicate there is no CYP20-3 homolog encoded by the tomato genome.
H There are four FBA proteins in the stromal proteome. The tomato FBA gene names were established by Cai et al (2016). Reciprocal BLASTP searches with the tomato and Arabidopsis FBAs indicate that the tomato FBA1 and FBA2 are highly related to both AtFBA1 (At2g21330) and AtFBA2 (At4g38970).
I There is one chloroplast PGK in tomato (cpPgk1) that is highly related to the two chloroplast PGKs in Arabidopsis (PGK1, At3g12760 and PGK2, At1g79550).
J Based on reciprocal BlastP analyses, AtcpHSC70-1 has highest identity with Solyc01g10340. This protein was named as a HSC70-2 based on identity with AtcpHSC70-2 (At2g17459).

## Sheet: Table S4D-uncharacterized prot
Table S4D. Uncharacterized or unknown proteins
Gene and protein descriptors					Proteomics						Number of times detected			Bin codes		Algorithms								Databases
Tomato Gene ID	Gene nameA	DescriptionB	Protein Sequence	Arabidopis homolog	Tomato protein NCBI accession	Peptides	PSMs	Unique Peptides	emPAI	Mol%	Acetone samples	Gel samples	Total	Bincode	Name	TargetP C ver.1	Transit peptide length	TargetP (reliability class)	ChloroP D	Predotar E	WoLF PSORT F	YLoc F	YLoc % Confidence	PPDB	SUBA4	plprot
Solyc12g014150	YCF45	Uncharacterized protein YCF45, GTPAse superfamily	MLSFALVHLHPSSSPNPQFHFPHKNQILPIQSLNFSPFTVIPTKLLSKPSFSRLLSSVSSSSLVADDFQVELGRLLSLLPEEMRRGVSEHPEYSNLIEVVMDLGRKPLARFPSGDFILSDQPITLGDLQQATSQVGDFAVDNRAGISRTLHRISAIRNRKGAIIGLTCRVGRAISGSANSLRDLVKDGASLLLIGPPGVGKTTIIRDIARMLANDYRKRVMIVDTSNEIGGDGDIPHAGIGNARRMQVPHNDMQHKVLIEAVENHMPQVIVIDEIGTKLEAMAASTIAQRGIQLVATAHGVTIENLVMNPALEMLVGGVQSVTLGDEEASRRRVQKSVLERKGPSSFSCGVEIISKAELRVHPDLEATVDAILAGRYPKYEIRKINPGSQDGIMEISSI…	At1g73170	XP_004251885.1	3	7	3	0.585	0.00377238	4	0	4	29.5	protein.degradation	Cp	59	2	Cp	possibly Cp	Cp	Cp	99.8	plastid stroma	plastid	-
Solyc05g026560	-	ARM-repeat superfamily	MIISIGGEMLLKPPTYLVKGVLRTPVGISVTVKRRKAYNPSFFSNSTFFHNHFNPRLCSSDGMGEVYVNPHQDFDMINDASSNVALFVRMLGLNADHDLLDREQAVIALSKYSLGGKQCVDTILQFRGSVNLTVNLLRSESNAACEAAAGLLRMISSVDIYRDLVADSGAVEEIYAVLRRSSLSSDVMEQGLCTLWNLSVDEKHRNKIANSDFLPLLIKFLEYEEVQVKEAAGGILANLALTASNHNNMIEAGVIPKLAMLLKNEAEGSKVIRNEATNALLELAKDEYSKILIMEEGLLLVPLVGAASYKSFKPPLYSWPSFPDGTKIEKTPKPSRFGASELLLGLNIEDNNVNIEEGKKNAMIGRTRQQFLARIGAIETEEENKSMGGLPSNPRFTLL…	At1g23180	XP_004239335.1	18	90	18	2.728	0.0163083	5	3	8	35.1.3	not assigned.no ontology.armadillo/beta-catenin repeat family protein	-	-	4	Cp	possibly Cp	Cp	C	71.7	plastid	plastid	-
Solyc04g015480	-	BTB/POZ domain protein TNFAIP protein	MASSSASSSSSNLSAIFPNSSSFNSQITHLFPIQSSYFNKNYRENALKFSSLSCSAAKQQTGPVKKRTSTNNTKKKKKPISNFESDVEVEEKGVQSSETYHPLPLPKPPAGFVLDEQGRVLMASNKRIATIVDSTNNFPLECVIRRVFRSTRGDECLLLCPVDMPVQILKSTNVEGWSAVSDEEVEAILPTAAYALAKIHMHLVYSGFCYTARGGCCYTEDDIFEFRTDDGDDVDGLPSEGIEITCFHMDGSHYMIYTPSDPLLFVAVKGKDGLLQIADDELLEDPAIISAIDEETEFNALVEEEAALLESLLGER	At4g33480	NP_001294941.1	3	6	3	2.162	0.00884092	2	1	3	35.2	not assigned.unknown	Cp	88	1	Cp	Cp	Cp	N	88.2	plastid	-	-
Solyc08g082570	-	CccP Conserved Cys-containing protein (IC) (AHRD V1 *-*- Q01E94_OSTTA)	MITATSMATGGSSSVFLSVPKLPSQKLQILSHKQVFFTNKKWSTLPFLCSSSTPLVEEENGSTDDVLPASINEESSSVLPPGACKGCGRLEIESGCNGEGRIQGGIATIPGFGWWPIKAYRPCPAFVASGGRYKRFGQSMDEVVSGKGGRVSTVGTDVEVQSSTKKNRTKRSKS	At5g42070	XP_010325350.1	1	1	1	0.389	0.00250847	1	0	1	35.2	not assigned.unknown	Cp	68	3	Cp	Cp	Cp	Cp	99.7	plastid	plastid	plastid
Solyc03g117740	-	Chloroplast At1g16080 protein (Fragment) (AHRD V1 *-*- Q1HRY1_SOLLC)	MKAAAAMVNTVTLSNSTFWHKPISRINQNFKIRASISTSGNMVAPAIIVGGGRVGRALQDLGNGDDVLVKRGEPVPIDFVGPILVCTRNDDLEAVLEATPKSRWSDLVFFQNGMLEPWFQSKGLGDADQVLAYFAVSKLGEPPTDGKTDTNPEGLTAAYGKWASAVAARLQNGGLSCKVLDKEPFQKQMLEKLIWICAFMLVGARHPGATVGAVEKEYRSEVSKLIAELAAAAAAEKGLVFEDAMEDRLCAYSRAVAHFPTAVKEFKWRNGWFYSLSEKAIAEGKPDPCPLHTAWLKELKIV	At1g16080	XP_004235881.1	15	212	15	34.938	0.0668389	5	3	8	35.2	not assigned.unknown	Cp	33	3	Cp	none	Cp	Cp	96.5	stroma	plastid	plastid
Solyc04g008710	-	Glutamic acid-rich protein-like	MALSSLVPALSSTPPCTAAMLNCSGSVSSTSSSPSCIGLLTCSFSQPPHTVALMPFLRPTSLCYSRSRRSSQIVRMAPEEEKKTQRSPLDFPIEWERPKPGRRADIFPQFSPMKTPLPPPMPGDPPEEEEEEEEKKEEEGEEDEEKEKEEEKEKDPDKDNPIKPPADFIPTK	-	XP_004236883.1	4	19	4	13.678	0.197473	5	0	5	35.2	not assigned.unknown	Cp	75	1	Cp	Cp	Cp	N	56.6	plastid stroma	plastid	-
Solyc09g011730	-	Nuclear transport factor 2 (NTF2) family protein	MWSAPNLQAMSLRPRIIQPHFCNDGCTKFRQHMFLAWSSINRVEINHCFTSHLHMQCCAVLADTTKIVSDNFRGNRSFDSKARTFKPFGQASHSLLLGRCQVRSEDSEGTLSGESILQNEETLARDLRTAIKEENYAQAAKIRDRLRLLQENSNASVLAANARFYNAFKTGDLAAMQALWSRGENTCIVHPGVSGISGYDLVMGSWEFVWAEYDFPLEIEIRDVQVHVRGDLGYVTCVEMVKTKGSSWGKQFATNVFEKVDGQWFICIHHASYIDL	At3g09250	XP_004246855.1	5	36	5	1.894	0.00918269	5	3	8	35.2	not assigned.unknown	M	104	4	-	possibly M	Cp	C	45.4	plastid stroma	plastid	-
Solyc03g083280	-	Pentatricopeptide repeat-containing protein (AHRD V1 *-*- D7KJV7_ARALY); contains Interpro domain(s) IPR002885 Pentatricopeptide repeat	MALSKHIFLTHHLRTLAKPHYLRHPQPPPSFISLRLLSFATPEEAAAERRKRKRRLRIEPPLSSLRQQHQPRPTTPQNPSSTNNPNAPKIPETVSVLSGNRLNLHNRILKLIRENDLDEAALYTRHSVYSNCRPTIFTCNAVMAAQLRQSRYSDLLSLHRFITQAGIGANIVTHNLLLTAFMDCRKTDMAMEHYKQLINNAPFNPSPTTYRILIKGLVDNNKIDRAMELKEEMLSKGMGEKRCRPDTLSYNNLIEQLCKNDLLGEAEELYKDMGEKGVSPDEFTFVLLMDTCFKESRPDDAAAYFKTMVESKLRPNLGVYDRLVDGLVKVGKVDEAKSFFDLMMGKLRMNDDSYKFMMNALFDIGQHDEVLKIVDRMLREDPADFSDELQEFVREALAK…	At3g49240	XP_004234966.1	7	14	7	0.905	0.00475901	5	0	5	35.1.5	not assigned.no ontology.pentatricopeptide (PPR) repeat-containing protein	M	36	5	Cp	M	Cp	C	49	-	mitochondrion	-
Solyc08g076090	-	Protein of unknown function DUF760 [PREDICTED: UV-B-induced protein At3g17800, chloroplastic]	MSVMFADVSVVLPSAAGGLKLSNAFSDSKFLLSPSFSKSSPSSSVPRLGLGLGKAQTRSWKIRATASGSSGGDLVPVAPVQLESAVGQFLAQMLQTHPHLLPAAIEQQLDNLQNERDAQLKENQSSTKDVLQKRIAEVKEKERRKILEEILYCLIVHKFVENDISMIPkinaseTSDPTGNVGYWPNQEQKLESVHSPDAFEMIISHITIVLGERAVGPLDSIVQMSKIKLGKLYAASIMYGYFLKRVDERYQLERSVSKPPESFQISTNPDEPAAPRQLWDPDSLIEIYPEDGDREGFAVSDIEGKPERLRSYVMYLDADTLQRYATLRSKEAVTVIEKQTQALFGRPDIKVTGDGTLDVSNDEVLSVTYSGLTMLVLEAVSFGSFLWETEGYVESKY…	At1g32160	XP_025888157.1	4	15	4	1.154	0.00231502	5	3	8	35.2	not assigned.unknown	Cp	63	2	Cp	possibly Cp	Cp	Cp	73.3	plastid	plastid	-
Solyc11g065240	-	Saccharopine dehydrogenase family protein expressed IPR005097 Saccharopine dehydrogenase	MASLGMYSWTTGIKKRVFVRAANLAKENEKRVEVAEKVRNSKAVILGGTGRVGGSTAIALSKLCPDLNIVIAGRNREKGAAMVSKLGKEFAEVNIDDREALEANLTDADIVVHAAGPFQQSENCKVLEAAIGTKTAYLDICDDTSYATRAKSYMNMALEANIPAITTAGIYPGVSNVMAAELVRTAKLESEGELERLRFYYYTAGTGGAGPTILATSFLLLGEDVIAYNKGEKIKLTPYSGMLSIDFGMGIGKKDVYLLNLPEVKSVHEVLGVPTVSARFGTDPFFWNWGMIAMRNLLPQEFLRDRSKVQQLVQLFDPVVRAVDGTAGEAVSMRVDLECSDGHNRIGIFSHKRLSRSVGISTAAFVLAMLEGSTKPGVWFPEEPEGIAVEAREVLLQRA…	At1g50450	XP_004250913.1	12	59	12	2.831	0.0139417	5	3	8	35.2	not assigned.unknown	-	-	5	-	possibly M	Cp	Cp	77.54	plastid	plastid	plastid
Solyc09g074660	-	Spermatogenesis-associated protein 20	MEMAEQQQQSSSLSTSSHTHKHINRLASEHSPYLLQHAHNPVDWYPWGEEAFAEARKRDVPIFLSIGYSTCHWCHVMEVESFEDEEVAKLLNDWFVSIKVDREERPDVDKVYMTYVQALYGGGGWPLSAFLSPDLKPLMGGTYFPPEDKFGRPGFKTILRKVKEAWNSKRDTLIQSGAFAIEQLSEALAATSTSNKLSDEVPQTALRKCANADHLAESYDSKYGGFGSAPKFPRPVEMQLMLYDSKRSGETGNSGEAKLKMVLFTLECMARGGIHNADHVGGGFHRYSVDECWHVPHFEKMLYDQGQLVNVYLDAFCITKDVYYSSLSRDILDYLRRDMIGPSGEIFSAEDADSYESEGASRKKEGAFYVWTSTEVDNIVGEHATLIKNHYYIKPSGNC…	At4g03200	XP_004247449.1	12	47	12	1.707	0.00896344	5	3	8	35.2	not assigned.unknown	-	-	5	-	none	Cp	N	48.94	plastid stroma	plastid	-
Solyc10g044710	-	TPR repeat (AHRD V1 ***- Q2HW44_MEDTR); contains Interpro domain(s) IPR011990 Tetratricopeptide-like helical	MAITHIYHVRVQPSVMKPFDKCYLGGKVVFGSRIQTYQNPVPTLSRRVFVCRVWDALTSGNSAVMAIRKGMHLFRQGDVLGSLVEFDKAIQLDPRQKAYLWQRGLSLYYLDRYEEGAHQFRIDVAQNPNDTEESIWCFLCEAQLYGVHEARKRYLEVGRDPRPVMREAYNMFKDGGDPEKLVAAFLSGRPNEYFYASLYAGLYYESQNEPDEGKVHLIAACQSPYGSRSDDYMAALSKVHCKCRNWNIN	At3g05625	NP_001306974.1	3	13	3	0.896	0.00430761	5	2	7	35.2	not assigned.unknown	-	-	3	Cp	none	Cp	M	74.1	plastid	plastid	plastid
Solyc02g087150	-	Uncharacterized protein	MATVSAFSVCRAKSHSRIPHSSSNAIPQLFPMQFLRCQSNRSIGGGYSCSSSSVKAKVPLRTTRICSATEEDGATAVAEEESAAPTTSDQTVSVSVSPSDVLTMFFQAEGTMNEAAIPSVTNSLEDIEGITGLKIQVVEGIASVELTKQTTIQATGVASSLVETIQGSGFKLQTLNLSFQDEEDIS	At5g14910	XP_004232276.1	1	19	1	2.162	0.0139417	5	3	8	35.1	not assigned.no ontology	Cp	77	3	Cp	possibly Cp	Cp	Cp	89	plastid stroma	plastid	plastid
Solyc04g009370	-	Uncharacterized protein	MPSTSSFWGLTTTNSAASTRMTSSLGTHPRICSLGGGPEHIVKERSCKISCFRYTDVESSWKELFPSKIQKFNSCRHLNTRKCWAVFSAATGDANDPDDSEDSKNPPENENESVNNEILRGNLERIVGRDDSAFSGIDLAALIRNKYGRSYDVQLIKKEFMGKNLLALNVMWKYREQRSFPLTEEEYLLRLDDVANTLKCWGAVSHIRNSLEKLKERPRIGKAVSIFIDMDESGGRAKEWIYK	At3g19900	XP_004236829.1	1	1	1	0.212	0.00136709	1	0	1	35.2	not assigned.unknown	Cp	50	3	Cp	Cp	Cp	Cp	94.8	plastid stroma	plastid	-
Solyc04g082310	-	Uncharacterized protein	MSSLTLKPTFLLQAYGSSSSSSAGSRRLCSLISFQKKTFRKQKFTLRAQSLDSPQNNNENDTKPPNGSMHKSRREILLEYVQNVQPEFMELFVKKAPQQVVEAMRQTVTNMIGTLPPQFFAITVTTVAENLAQLMYSVLMTGYMFRNAQFRLELQQSLEQAALPEAQEEKDSPDYASGTQKKVTGEVIRWNNVTGPEKIDALKYIELLEAEVEELNRQMERKSGNGYNELLEYLKTLEPQNIKELTSTAGEDVVLAMNSFIKRLLAVSDPSQMKTSVTETSAPELAKLLYWLMVVGYSIRNIEVRFDMERVLGTSPKLAELPPGENI	At1g63610	XP_004238419.1	8	35	8	6.017	0.025304	5	3	8	35.2	not assigned.unknown	Cp	47	3	Cp	possibly M	Cp	Cp	89	plastid	plastid	-
Solyc05g007060	-	Uncharacterized protein	MENQSFSMLSASKPQNGAVIQDSSFQGSESFFRSVLGNMEAIYLNKNPTAKAILELVRSADDDQICYNADHFAFRTFGVNGHGIDSMSKFFLDFGYERREELRFPAKKLKAFWFSPPKVSTSSRGSGVHGPLPRIFISELLVDQLSPEAQEIIKKYTNISHCGKEYAALASAFGILTWEKPSYSEFQLLARESEYAAWTLVNGYALNHVTISTHRLASNLRSIGNLNQFIEENGFNLNSEGGFLKVSPDGLLLQSSTVADSTFFEFSDGITEAVPCSYIEFAERLVLPQYKDLPAEKVEEFHRRDGFEVGNADKIFESTSKDQLTRRAA	At1g07040	XP_004238769.1	9	44	9	6.356	0.019223	5	3	8	35.2	not assigned.unknown	Cp	58	5	Cp	none	Cp	C	81.7	-	plastid	-
Solyc06g076790	-	Uncharacterized protein	MASLNMFVSPIATVTAQQHRSRVYTAATASKSSGGSTEEKSLLDFILGALQKQDQLLETDPLLKKVEDKSVSTTSSGRKNSVAVPPKKNSNGGGFAGFGGLFNKKD	At3G47070	XP_004241176.1	6	86	6	18.307	0.118053	5	3	8	35.2	not assigned.unknown	Cp	28	4	Cp	possibly Cp	Cp	Cp	84	thylakoid-peripheral-stromal-side	plastid	plastid
Solyc07g062440	-	Uncharacterized protein	MQNQNLSVAKTLNPTFTTLQSPSIAQFFNPLRRTLPTIPSTYNRTPKPLYIQAQNRELAISRRDDSHRRDIRSFAGRSKGKSGGTSPGRIEGSGEFRRQAKRNARRKSKKLAESLFYRLKNPHGNYPDNFSEEELQMIGLGYDRMVRFMERDDPNLKHPYDWYKYGQFGPYSWRGVVLGEPVRGRFSDPCVSMIGEVRDQEEWEKIEQHEMAQEFQNRLDAMDKNVGFRYFWVFVRHPKWRISDSPWQQWTLVSEVVVEAGNQRLDKWNLMGRLGNKARSLITQCAAWMRPDIVYVQRPVYQCRFEPQDDFFKALTPLLDPETEQDCLFELEDDNGRMEFCTYFGGLCKIVRVNPKAFVDDVVKAYEKLSDEKKSKCLGFLLDNHPVPLLHPYTKEWKV…	At3g14900	XP_010324394.1	1	2	1	0.077	0.000496536	2	0	2	35.2	not assigned.unknown	Cp	52	4	Cp	none	Cp	N	53	plastid stroma	plastid	-
Solyc08g013720	-	Uncharacterized protein	MSRLSVWGGPSASVFPIGNEKVLSSISHSRRQVHLRRRKTIRSCAADFKVLTSVTSNYNSIVILDTPQSRVLLLDSSNNVHSILHKETKWTGAYWDEFAGLPAIVPKGPLAIFGLGGATAAHLMLELWPSLLLVGWEIDEILIAKAREYLGLSDLEKHTQGGGVLEVHIGDVFSSSVTIPGGYAGIIVDLFSDGKVLPQLEEVTTWLEMNKMLMPNGRIMVNCGAATKELSDNSEMMQLDISKRDDPLELNATINALCKAFPEQVGWKKLPKSAGENYLALTGPLPDLDIWSAHLPDQLSSSVKEWRSCTPSPS	At5g44600	XP_025888437.1	6	44	6	5.813	0.0298115	5	3	8	35.2	not assigned.unknown	Cp	43	1	Cp	none	Cp	Cp	96.7	plastid	-	-
Solyc08g015620	-	Uncharacterized protein	MLTSSLRLPFLPLPHSHPVFSPLNFTKVVHFNNPNCPLNPISSSKRCGSTSSSSNGHTWPDGDAERYCSNDNLRKEDDYAIQMFGSDEELSSQIPTQVQTLVEGSGSVLVSEYKPVPDVDYLQELLAIQQQGPRNIGFFGTRNMGFMHQELIEILSYALVITKNHIFTSGAAGTNAAVIRGALRAEKPELLTVILPQSLEKQPPESQELLSKVKHVIEKPHNNADHLSLLEASRLCNMDIISQVQQVICFAFHDSRLLMETCQEAKNLRKIVTLFYLD	At2g43945	XP_004244778.1	5	80	5	11.915	0.0322103	5	3	8	35.2	not assigned.unknown	Cp	46	2	Cp	possibly M	Cp	Cp	33.5	plastid stroma	plastid	-
Solyc08g076450	-	Uncharacterized protein	MATFSNIGAICKVTSAPSLSSTSSRALFPTTLRSYSHSQVSRSRSCRLCIKSSYAEAVRGDPNSDAIDVVADVKTERIVVignaGSGFVGSAICKAAVSEGIEVISLSRSGRPSKSDSWVDQVTWITGDVFYANWDEVLIGATAVVSTLGGFGSDEQMLRINGEANVVAVNAAKEYGTPKFILISVHDYNLPSFLQSSYFIGKRKAESEVLSKFPSSGVVLRPAFIYGKRKVDGFEIPLDLIGEPLEKLLRATESFTKPLNSLPASDLILAPPVSVDDVAYAVINAVKDDDCFGIFTINQIKEAAAGVKV	At1g32220	XP_004245953.1	8	66	8	3.87	0.0171015	5	3	8	35.2	not assigned.unknown	Cp	54	1	Cp	Cp	Cp	Cp	99.4	plastoglobules	plastid	-
Solyc06g061090	-	Uncharacterized protein - TLDc domain protein	MSCSIAILNSISTPYFNKYCTRSLFKWNFGKNNKIDDKPQFTYHDLDLPFPPSLLTKTFLKGRELKCCYKASVDGFSATEFHNRSDFKGPCVIIGYTTEAFKFGAFNPEGYRSTDDYYDTFDAFLFYWDEDVEKPIMLPKVGGSGAALFDYARGGPQFGADGLLIGPPLAPVMGGFAGPDTNSGVGDLRQAKSRLGLSYAKRPDGKESLFGDESKAVVDEVLVFCSPQIASLY	At1g32520	XP_004241970.1	2	4	2	0.778	0.00215381	1	2	3	35.2	not assigned.unknown	-	-	4	-	possibly Cp	Cp	PM	58.1	plastid stroma	plastid	-
Solyc02g067050	-	Uncharacterized protein (AHRD V1 **-- B6SSQ6_MAIZE); contains Interpro domain(s) IPR003774 Protein of unknown function DUF179	MEACFVTSKPLSEKLFPLLGSRVSYSTRRRSFVSQFHQPKKVGNPFSVTCCQASSPLPSPSPQDEERPFTETDWRSFRARLVAGERASRSEDRSSVVNPDTVDDLPPPPAVTIGSKWAHTIHEPEKGCILIATEKLDGVHIFERTVVLLLSMGPIGPMGLILNRPSLMSIKEMKPSVLDMSGTFANRPLFFGGPLEDELFLVSPNEDGLGKSGVFDEVMRGLYYGTKESVGCASEMVKRDVVGVDNFRFFDGYCAWEKDQLKDEIRAGYWTVAACSPSVignaLSDVGSVGLWDEVLGLMTPKKVW	At3g29240	XP_004233379.1	2	2	2	0.425	0.00274062	2	0	2	35.1	not assigned.no ontology	Cp	50	4	Cp	Cp	Cp	Cp	66.5	plastid stroma	plastid	-
Solyc05g055430	-	Uncharacterized protein (RAP Annotation release2) Galactose-binding like domain containing protein (AHRD V1 **-- Q10RT4_ORYSJ); contains Interpro domain(s) IPR018971 Protein of unknown function DUF1997	MALSSASSSLTNLSYISFQYKNPRFSTTLSSVDSSKCTTLRITADSAPKARFIGRRKESLSVKQLQRPLMEYMSLPASQYSVLDAERIERVDDSTFRCYVYRFKFFAFEVCPVLLVRVEEQPDGCCIKLLSCKLEGSPIVVAQNDKFDASMVNKISYDSKLRDSPLQQLTSDAIIEVNIEIPVAFRAIPVQAIESTGSQVLDQILRIMLPRFMAQLVKDYQAWASGDTSRQPLGTGQI	At5g04440	XP_010321338.1	1	1	1	0.212	0	0	1	1	35.2	not assigned.unknown	Cp	43	1	Cp	Cp	Cp	Cp	0.9927	plastid stroma	plastid	-
Solyc06g053920	-	Uncharacterized protein LOC101257179 [Solanum lycopersicum]	MATRFPATTHSRVVATSSGEPKVEYPFSVSTRKWQVVTQRRRKSSRIKATDSDSFLEMWKRAMERERKSAEFKRIAENIAPPEVDESPEILEKKTKEFNKILQVSPEERDRVQSMQIIDRAAAALAAAKALIEENPLPRKDDDESDKSKKQGAGNVISIVPRSGTMMGTPGPSFWSWIPPSDSSFDDIQMKSDVSLSPNPPSPVIEKERSPDFLSIPFQSATIDKKHSPPLPPLQSHLEVENLEDSSSTPEIPQQVEERELGILFSANAAEAAHALKQKDEASSEGINPDGSRWWKETGTERRADGVVCKWTLTRGVSADKTVEWEDKYWEAADEFGHKELGSEKSGRDAAGNVWHEFWKESMWQNGGLVHMEKTADKWGKNDKGEEWHEKWWEHYGAG…	At3g55760	XP_004241037.1	2	2	2	0.166	0.00107045	1	0	1	35.2	not assigned.unknown	Cp	61	2	Cp	Cp	Cp	N	99.8	plastid stroma	plastid	plastid
Solyc01g098990	-	Uncharacterized protein LOC101264675 with DUF1955 domain	MASALYSSLSWCCTPIPKPSFKTPFSSSIYPLNTRGFSGISLHKSVPSSRTHAKFDKFQGQENLEPDPQLQTVEEEDQEEDDSRVELLIPQLQFLDDEGAQAELWELSRTFLETLIEETGCERVKAIFPDAGAAALLKYRWKDATFEFASLGDRKPVSKEDEIVVMVVPDYQMLEYVEKIASDLSDDPPRPLIMWNPRLISEDVGVGINVRRLRRNFLSTFTVAYSMRPLPDGAVFRCYPGLWKVFYDDKDRPNRYLLAKEQISRPTIEDLEIIYGGVDEKEDKGPSLLNQAAGIFSSINRFMKVISR	At5g27560	XP_004230190.1	4	19	4	4.012	0.00975016	5	3	8	35.2	not assigned.unknown	Cp	73	1	Cp	Cp	Cp	Cp	99.9	plastid	plastid	-
Solyc12g099400	-	Uncharacterized protein LOC101264805 [Solanum lycopersicum]	MTTHSTPPVSVGPLSLPYARVYTRSRPTYVASATSPPRSLRFSLSRRRDYFFPRKFTMPSAGSADFPVDGDELKFPLELADESDFDRIVSSDGLITICGFGSLLSERSARSTFPDLINFRVAKLSGFRRVFAHVAPIFFERGIAKPETKEISSLSVEPCEGETLIVTIFEIQRSEIPAFIEREHEFRFLAVIPETLNDLFYVNPAVICARYSDEEYLKNRCKGDKEIFFQRYGRYNIDKIWRDDIFPCRVYLRHCVLAAQNLGNLAYDNFLNADHTFLGDRRTTIREYLLTTGSGIMEEEPPELLKQRYGG	At4g16060	XP_019067119.1	5	18	5	1.848	0.00844756	5	3	8	35.2	not assigned.unknown	Cp	58	2	Cp	Cp	Cp	Cp	99.8	stroma	plastid	plastid
Solyc11g030710	-	Uncharacterized protein with DUF179 domain (putative electron transporter)	MISSLYCWFTCFSTRKGPEEDNLKGSNPSPENDSSKNTGSPKAHQKPLDWREFRASLYIQELAIVSDTQKQEGTSFGPEALPLKWAHPISAPENGCVLVATEKLDGVHTFERKVIFLLRSGNRHPQEGPFGVVINRPLGKKIIDMKPTNVDLATTFADCSLHFGGPLEATMFLLKTGAGSGLPRFEEVIPGVCFGARNSLEQASALVNKGVLKSHDFRFFVGYAGWQLDQLREEIESGYWYVASCSANLIFAGSQTSSSESLWVEILQLMGGQYSELSRKPKQDI	At1g33780	XP_004250645.1	3	6	3	0.638	0.00411415	4	0	4	35.1	not assigned.no ontology	_	-	3	-	none	Cp	Cp	99.38	plastid stroma	plastid	-
Solyc03g007540	-	Uncharacterized protien DUF3143	MSTISATFFRSLYCIASPPPSTISRFFLPTPLLLPKFRSCPKPLTSSSRKPVACTNSSEEAEVSQTMDEWLQKLPDKTKPLYSHSLPCIEAWLRSLGFYQSRDDRALWFVENPDWQAQLSLDITELHIRYLKRGPGNLEKDVDRRFSYALSREDIEILGGP	At5g52960	NP_001353345.1	2	6	2	0.778	0.00501695	4	0	4	35.2	not assigned.unknown	Cp	56	1	Cp	possibly Cp	Cp	Cp	95.1	plastid stroma	plastid	-
Solyc03g006540	-	Unknown Protein (AHRD V1)	MANMLNHRILFQCNNSQCLPYLLPCYFPNHNSNSIQTIFSLSQSSSLLTSHKSTVKRSLSIVICHARRRIIYDNDDDEKEDNNNSELAMLEFYSQTMRNEALLVKALVDEEDVEVLIFKGFSSCLSCRTSPDPSKSVLPARAVIKCIDRIKGPFDPSNIVYLEKGLTLEAFKDRILPRAK	At2g01755	XP_004234127.1	4	9	4	1.512	0.00641628	4	0	4	35.2	not assigned.unknown	Cp	12	3	Cp	Cp	Cp	C	91.7	plastid stroma	plastid	-
Solyc06g084470	-	Unknown Protein (AHRD V1)	MAWPLLTVSGCYCLGLSQLHVNVQLQPITRREIVHPSIHQCILSVDRIRARLPLLNAQTNGDYDSEQLIEDLRVPQQWLQPSKALEESEWLQTALNKWLDDEYCPEETNIEISRIAANSFYRSLLENKSDIGEILLTMAGDLESISYQESFHGAFSSANAAVNLIIQRLEQY	At4g03150	XP_004242319.1	2	5	2	2.981	0.00975016	2	2	4	35.2	not assigned.unknown	M	40	4	-	Cp	Cp	EX	66.8	plastid stroma	-	-
Solyc07g056240	-	Unknown Protein (AHRD V1)	MALNLSSVFVQPKSFLIPCTHKLYYSSLRRAALSEQGDGRVTKEEELPTYSGSLSSARTQLDLLEQLTSSSSEVNGYESDSTSGKPTIRDQLANLVGSRDDDFSIPLGKNLKKFSAKFLTTSQKRNIKRQAYLNEVSRRNDSTFFATIGAFVILPPLVILGIALATGYVQLFP	At2g42975	XP_004243212.1	1	1	1	0.292	0.00188297	1	0	1	35.2	not assigned.unknown	M	25	5	-	Cp	Cp	PM	97.1	plastid	plastid	plastid
Solyc10g007670	-	Unknown Protein (AHRD V1); contains Interpro domain(s) IPR001075 NIF system FeS cluster assembly, NifU, C-terminal	MALQLQHLSSSTTPKFNTFASQLLPIFQNVVCVSKFKNGGITSLRLSSSSSRIRKKRTTYLCRISASLSPLDLTEDNIIQVLEDAKAELAQLFDTTVGITGKAELAEVDGPYVKLRLSGKFWHTRSTVVARLGNYLKQRIPEILEVDIEDEKQLDDSPANF	At2g33180	XP_004248220.1	4	61	4	4.012	0.0258715	5	3	8	35.2	not assigned.unknown	Cp	82	2	Cp	Cp	Cp	Cp	57.9	-	plastid	plastid
Solyc01g103110	-	Unknown Protein (AHRD V1); contains Interpro domain(s) IPR007434 Protein of unknown function DUF482	MAITGALPSSPFLGHVPFYLGKSSSTHFTHNSVCIFKVKALFWGSRRSVKPADKVLSLGEFTLSEADSLGNTGTPEKISVSVVSSIAEVSPDNWDSCSLDATGHQQFNPFLSHGFLSSLEESGSAVEGTGWIPQHIIAEDASKNILGVVPLYLKSHSYGEYVFDNSWANAYYNYGLSYYPKLQCSVPFTPVTGPRILVRNTSHRDQVFDILVSALKDLAAKFKVSSLHITFPTSNEWNKLEEKGFLQRTGMQYHWKNRNYKNFDEFLMDMKQSKRKNIRQERKKISAQNVTMKRLRGHEIKASHWDTFYKFYRNTTDNKWGTAYLTRDFFHRMGAKMGDNVLLVVAEEGDELVAAALNFIGGDTLYGRLWGCLPGTYYANLHFEACYYQAIDAAIELNL…	At2g23390	XP_004230420.1	3	13	3	0.54	0.0034822	5	3	8	35.2	not assigned.unknown	Cp	34	4	Cp	possibly Cp	Cp	Cp	95.8	plastid	-	-
Solyc08g043180	-	Unknown Protein (AHRD V1); contains Interpro domain(s) IPR016124 Mog1/PsbP/DUF1795, alpha/beta/alpha sandwich	MCTQPNSISRRQVFFTGSNLLLSQLIPKSDAQTNSNSFLSGIANTKSWFQFYGDGFSIRVPPEFQDLTEPEDYNAGLSLYGDKAKPKKFAARFASSDGSEVLSVIIRPSNQLKITFLEAKDITDLGSLKEAAKIFVPAGSTLYSVRTIKIKEDEGFRTYYFYEFVRNEQHVALVAGVNSGKAVIAGATAPESKWAEDGLKLRSAAVSMTIL	At5g27390	XP_025888327.1	5	28	5	1.894	0.0122135	5	3	8	35.2	not assigned.unknown	M	93	3	Cp	none	Cp	Cp	85.7	plastid	plastid	-
Solyc03g026330	-	Uncharacterized conserved protein (AHRD V1 *-*- Q7VAI6_PROMA)	MGSQIYSSTPQFSCQFPKIKSRQISSYSSVQLKPRISIISCQQQPQSTGVVTETPVPRTAIYNVDFKTFEDCKLGISRYPDFVYNAQGGTGTGTGKRIESSDEISIDFDLEKLYIPPLTSATAKFLGLPLPPFLKIDVEPELLRGYVNQETG	At5g62140	XP_004234348.1	3	20	3	1.154	0.00744159	5	3	8	35.2	not assigned.unknown	Cp	40	3	Cp	Cp	Cp	Cp	99.9	plastid	plastid	-
Solyc06g042980	-	Uncharacterized protein	MSTIYSPSRTSATSRLPLGGAVAAAGGGGGVSGASRLRSSSLKKPPEPLRRAVADCLSSSSSPAHHGTPSATASEASRTLREYLAAYPTTDLAYGVILDHTLAERERR	AT3G12590	XP_019069964.1	1	1	1		0	1	0	1	35.2	not assigned.not annotated	Cp	na	2	Cp	Cp	Cp	M	69	-	-	-
Solyc06g063230	-	WD repeat protein	MQYPQATAAPERARARSLAVFSPKIITCKNRQQASHFCSTKFGSALPSGTSLSISRRANYNAAVRATSSSFSSSASPWDEKPYQVLPNGKIVYLDEQDVVTFLDPPMELIPLDPSSYNPALYLWKKIEDIPEERRHRLLALLNPRLISQAWEIAGTRYNNSKLVEKSASSLLATGNSDTVAEFWKCRTSGGPLQIAWLNFFKKVVFHAGDGKAYGRLISESVFSGLSSSFSPLYFTVSEVKEVMSTEEPCDLAYEFKDGILDLPDFPRGFPMPAEHPWPFNDEIVIYIRHAGPGVMVGQAWQEGKALQQVPKKLCSEILMVKEYLSS	AT1G73090	XP_004241908.1	1	1	1	0.155	0.00099952	1	0	1	35.2	not assigned.not annotated	Cp	na	3	Cp	none	Cp	M	46	plastid	-	-
Solyc05g012120	-	Uncharacterized protein	MMISRLSSKFNFFLRNPFFPTPLYHHNHRFLTILQQKQALHHLPNGLQNGPFFKNHISVLPLRCLSINSSEEIIPERNGNDPLHYETIEDVEPIDLWEEEEEVEPEIGDGGDGGGIVFQSCSWGEQALSIARDVLLPFGDDMELYSFKTSPHGYIYVRLDKLPNNFGCPSMDEMEEFSRQYKKRLDEAGALGKIPEDLAIEVSSPGAERLIKVPDDLSRFKDRPMRVIYIEEMNSRKVEKNGIFFMESIDAESGSCVWKLADVKENRDPASKGRPLSRKQKDWRLKLPYAMVKKVILYLNY	AT1G77122	XP_004239458.1	5	14	5	1.512	0.00975016	5	1	6	35.2	not assigned.not annotated	M	na	3	-	M	Cp	Cp	60.71	plastid	-	-
A Names of tomato proteins were based on the literature, NCBI annotation (identified in BlastP searches), and/or SolyGenomics descriptor. In a small number of cases, tomato protein names were assigned based on NCBI annotations and the Arabidopsis homolog.
B Some Sol Genomics descriptors were updated when NCBI annotations and Arabidopsis gene annotations were aligned.
C Target P's subcellular locations are: chloroplast (Cp), mitochondria (M), secretory (S), and no predicted location is indicated by a dash (-). Proteins discovered after TargetP1.0 was retired do not have transit peptide predictions (na).
D ChloroP was used to predict the presence of a chloroplast transit peptide (Y) and the lack of a predicted transit peptide is indicated with a dash (-).
E Predotar's predicted subcellular locations were: chloroplast/plastid (Cp),endoplasmic reticulum (ER) or mitochondrion (M). For proteins with localization predictions that were less clear, Predotar provided categorized of possibly Cp, M and ER. Proteins with unresolved locations or that did not have a homolog detected by Predotar are indicated with a dash (-).
F WoLF PSORT's and YLoc's predicted subcellular locations were: chloroplast/plastid (Cp), cytosol (C), cytoskeleton (Cy), endoplasmic reticulum (ER), extracellular (EX), golgi apparatus (G), mitochondrion (M), nucleus (N), peroxisomes (P), plasma membrance (PM), and vacuole (V). Proteins with no chloroplast location in WoLF PSORT are indicated by not Cp.The number of proteins predicted to be in t…

## Sheet: Table S4E-Enzymes unknown fxn
Table S4E. Miscellaneous enzymes of unknown function
Gene and protein descriptors						Proteomics					Number of times detected			Bin codes		Algorithms								Databases
Tomato Gene ID	Gene nameA	DescriptionB	Protein Sequence	Arabidopis homolog	Tomato protein NCBI accession	Peptides	PSMs	Unique Peptides	emPAI	Mol%	Acetone samples	Gel samples	Total	Bincode	Name	TargetP C ver.1	Transit peptide length	TargetP (reliability class)	ChloroP D	Predotar E	WoLF PSORT F	YLoc F	YLoc % Confidence	PPDB	SUBA4	plprot
Solyc08g008530	-	Aldolase (AHRD V1 ***- D7JQJ4_ECOLX); contains Interpro domain(s) IPR005000 HpcH/HpaI aldolase	MAAMAGFSSSSSSSLSTLRKSFTSTSPIFPSFHSLLPRIPKPSSLKTVNPTFKPSLPRRFSSAVAATADSAEVRQSLKTRLKNGETLYGIFLLGFSPTLAEIAGLAGYDFAVVDMEHGHGGISDALPCLHALAATQTPAILRIPESSATWAKKALDLGPQGIMFPMIDGPKSARKAVSYCRFPPNGVRGSAHTVVRASSYGIDEGYLSNYEDDLLIMCQVECVDGVKKIDEIAAVEGVDCIQMGPLDLSASLGYLWDPGNKKVKEMMNTAEKGALKKKPLDGGAYLSGFAMPHDSPENLKSRGYHMVSGAVDIALFRNAAVEDVNKFKMSLDKGFEDQKNADHKDGEEKYWSE	At4g10750	XP_004244652.1	5	8	5	1.424	0.00918269	5	1	6	35.1	not assigned.no ontology	Cp	64	1	Cp	Cp	Cp	Cp	99.6	plastid stroma	plastid	plastid
Solyc02g086080	-	Alpha/beta hydrolase fold (AHRD V1 ***- A1T9R4_MYCVP); contains Interpro domain(s) IPR000073 Alpha/beta hydrolase fold-1	MATVCTLILPKFPQSRGVSTTRAVLKRDPKMKVPYELKQEQSRLFHKLPSGLNMEVLYQRGSDQIRSTKNPPLVFVHGSFHAAWCWAEHWLPFFSQNGYDSYALSLLGQGESDSPAAAVAGTLETHAGDIADFIHKEIRLPPVLLGHSFGGLIVQYYIANIRREAVKGSDSEKKSLFPNLSGAVLVCSVPPSGNSGLVWRYLFSKPLAAFKVTRSLAAKAFQTSLPLCKETFFSAGMEDQLVARYQELMTESSRMPLFDLRKLNASLPVSRLEDPAFKVLVVGAKDDFIVDMEGLNETGRFYGIPTVCIEGVAHDIMIDCSWRKGAQLILSWLNSLN	At5g38360	XP_004232353.1	4	11	4	0.778	0.00501695	5	2	7	35.1	not assigned.no ontology	Cp	22	5	-	possibly Cp	Cp	Cp	62.9	-	-	-
Solyc04g007450	-	Alpha/beta hydrolase fold protein (AHRD V1 *--- B8JCK0_AD2); contains Interpro domain(s) IPR016969 Uncharacterised conserved protein UCP031088, alpha/beta hydrolase, At1g15070	MGYPIQSDIRSAIQIAAAFRHHNQYRYRRLPPAVISYRNAPNCCFTVNSSFKLRAFSTNDGDTTVQKVCNKPSLCTADELHYVSVNNSDWKLALWRYIPPPQAPKRNHPLLLLSGVGTNAIGYDLAPGSSFARYMSGEGFDTWVLELRGAGLSVQESDSTNIEKTAIAVSEQMEAAADNATDKVLSAAQQSTDSQSTLEESDTAVVKEESTAISTLWDESRVVNELTETFILLSERVSGFLNESQSRIMSAKLFDQISKLLEDSFLYERFNETRGKLLSLLETGQNSAVVDQVKDLSQKLVNIIEEGQRSVSPLVDLHERLTTTIEDFQKQLDLIVKYDWDFNADHYLEEDVPAAMEYIKAQTAPKDGKLLAIGHSMGGILLYAWLSQCGLQGREPGLT…	At1g15060	XP_004236968.1	6	9	6	0.817	0.00526844	3	0	3	35.2	not assigned.unknown	M	56	3	Cp	Cp	Cp	Cp	41.2	plastid stroma	plastid	-
Solyc03g116110	-	Alpha/beta hydrolase fold protein (AHRD V1 ***- B2J569_NOSP7)	MASSAIFNFLPSSSSSLSTLSFRNSRTQTPIFYKPLIVKASTSVDYSSSSLAGISTKNNNWVWKYKDNSVNIYYEEHHKGSDEPCKNILMIPTISDVSTVEEWRSVAKDIAGRDGKVNYRTAIVDWPGLGYSDRPKLDYNADVMEKFLVDFINAPDSPVNNSDKDLVVFGGGHAATLAVRAAKKGLVKPKAIASIAPTWAGPLPIVFGRDSSMETRYGFLRGTLRAPAVGWMMYNVLVSNEKSITSQYKSHVYADPEKVTPYIIESRFALTKRQGARYVPAAFLTGLLDPVKSREEFVQLFAELEGNIPCLVLATAGSPKRSKAEMEALKEAKGVSKYVEVPGALLPQEECPEIVAEQLYRFLQEIYEL	At1g74640	XP_004236001.1	4	10	4	0.833	0.00537162	4	3	7	35.2	not assigned.unknown	Cp	39	3	Cp	Cp	Cp	Cp	95.6	plastid	plastid	-
Solyc01g008070	-	Alpha/beta superfamily hydrolase (AHRD V1 *--- D0CIF5_9SYNE); contains Interpro domain(s) IPR010765 Protein of unknown function DUF1350	MNCVTAPKANWRCSPAISFYSDSTKLYNRSSIRFYAGNRNSSRIRCNLKATGSSNNQPETSTGIQLYRDIERLLTETVKQSQDWGSSQDWDEIEGAWVLQPKTSKPKLVVHFIGGVFVGAAPQLSYRLFLERLRQKDVLVIATPYASGFNADHFYIADEVQFKFDRCLRFLQERVQDLPVFGIGHSLGSVIHLLIGARYAVKRNGNVLMAFNNKDASLAVPLFSSVLVPMMQNLGPVLSQIASSPTIRLGAEMTMKQIENLSPSIMKQVFPLVEQLTPLYTDLINGKENFTPRPEETQRLIRSYYGISRNLLVKFKDDTIDETSTLAQVLSSGSAISSMLDMSIRTLPGNADHALPLQQALPNAPPGMTDAVNRSSELLANLTAGTPWENVTKEVGNTL…	At5g47860	XP_004228544.1	3	17	3	3.642	0.0234855	5	3	8	35.2	not assigned.unknown	Cp	45	4	Cp	none	Cp	Cp	99.6	plastid	plastid	-
Solyc01g080140	-	Alpha-beta hydrolase super family	MDLSTSASFSSSSSSSWFSGIVRGRSTSVKMSNKNPAAAAAAGGTDSVSGAGPITAKKQFRGVMFKYGPKAIQVAFKTGDYKQQLIFIGGLTDGFLATDYLEPLAIALDKEKWSLVQFLVSSSYSGYGTSSLRQDAMELDQLISYLINKEDSEGVVLLGHSTGCQDIVYYMRTNAACSRAVRAAILQAPVSDREYKATLPDTASMIDLASNMISEGRESELMPREANPDAPITAFRYHSLCAYNGEDDLFSSDFSDDQLKQKLGHMSNTPCQVIFSMGDEYVPDYVDKKALVDRLCKAMGGAEKVEIEYGNHSLSNRVVEAVEAIMSFVKREGPSGWDDPWN	At5g19050	XP_004229445.1	1	1	1	0.233	0.0015025	1	0	1	35.2	not assigned.unknown	Cp	37	2	Cp	possibly Cp	Cp	Cp	98.5	-	-	-
Solyc01g081480	-	Alpha-beta hydrolase super family	MNVVAWLSPCTTISSPNIFSCCSAISCQAESSLTTTTATAIRPAVILPGLGNNTNDYEKLALILKGYGVPTAIAKVSRIDWLRNAAGLLDTNYWRGTLQPRPVLDWYLKRIDEAVSEAKELAQGESGTLSLIGHSAGGWLARVYLQEFGSSDISLLLTLGTPHLPPPKGLPGVIDQTRGLLYYVEKNCGKAVYSPELRYVCIAGRYIQGSRFFDSSSTYSSEVMDGAEQPMSEVAAVSNTNAETETGSTFRTRFVGQGYKQVCGQADVWGDGVVPEVSAHLKGALNVTLEGVYHSPVGSDDATRPWYGSPAVVEQWIRHLLV	At5g17670	XP_004229542.1	2	6	2	0.52	0.00335323	4	3	7	35.2	not assigned.unknown	S	-	4	Cp	possibly Cp	Cp	Cp	98.2	envelope	plastid	plastid
Solyc01g009970	-	Amidohydrolase 2 (AHRD V1 ***- Q01SB2_SOLUE); contains Interpro domain(s) IPR006992 Amidohydrolase 2	MVAAVTVNSLKPLTCAPFFSSLNSFNCPCSLVSIPTIHSRLRPLLAQMAATGEVEPQVIDSHLHVWASPQEAAEKYPYFPGQEPSLTGHVEFLLECMEEAGVDGALIVQPINHKFNADHSYVTSVLKKFPSKFVGCCLANPAEDGSGIKHLEDLVLKDGYRAVRFNPYLWPSGEKMTNKIGKALFSKAGELGVPVGFMCMKGLLLHLQEIEELCTEFPSTVVLLNADHVAFCKPPKNDEERRGYSELLKLSRFPQVYVKFSALFRVSRNPYPYEDLPHVLPQLVSSYGAHRIMWGSDFPYVVAECGYKEAREAVSYLAKQGHLPSSATEWIMGKTIMQLFDGKWSSVAN	At2g35450	XP_004228429.1	7	30	7	4.878	0.0314559	5	3	8	35.1	not assigned.no ontology	Cp	45	5	Cp	possibly Cp	Cp	PM	40.8	plastid stroma	plastid	-
Solyc03g121670	-	Beta-lactamase domain protein (AHRD V1 **-- D5SNK2_PLAL2); contains Interpro domain(s) IPR001279 Beta-lactamase-like	MAVFLGIVRPPSHSLFSITRFTRQFSFTNNNSISISRKSFSRFKPIVTASLHSSSANSPNGAEISTNQSELIFLGTGTSEGIPRVSCLTNPVKTCPVCSKAAEPGSKNRRLNTSILIRHSRPSGNRNFLIDVGKFFYHSAMKWFPAYGIRTLDAVIITHSHADAIGGMDDLRDWTNNVQPSVPIYVASRDFEVMKKTHYYLIDKSNIIPGAAVSELQFNIIKEDPFVVHDLKVIPLPVWHGSGYRSLGFRFGNTCYISDVSDIPEETYPLLQDCELLIMDALRPDRSSATHFGLPRALEEVRKIKPKRTLFTGMMHLMNADHEVVTERLLKLRETEGVDVQLSYDGLRVPVSL	At3g13800	XP_004235592.1	4	12	4	0.896	0.00577787	5	3	8	35.1	not assigned.no ontology	Cp	48	3	Cp	Cp	Cp	M	51.8	-	plastid	-
Solyc05g055810	-	Catalytic/ hydrolase (AHRD V1 ***- B6TLB5_MAIZE)	MALLLSWRPSSAYNISFPFTMKNTSSSKSVKMGSFSTISCSITSSSASTMVAQRKLPILLFDVMDTIVRDPFYHDVPAFFRMSMKELLESKHPTSWIEFEKGLISEEELTRKFFKDGRSFDMEGLKNCMRRRYS	At1g79790	XP_010321332.1	5	24	5	6.197	0.0399615	5	2	7	35.1	not assigned.no ontology	Cp	39	2	Cp	Cp	Cp	V	55.2	plastid stroma	plastid	-
Solyc01g068620	-	Cyclase/dehydrase (AHRD V1 *-*- D7E269_NOSA0); contains Interpro domain(s) IPR005031 Streptomyces cyclase/dehydrase	MQVQYQLWWHTITTSSLPLSSIFYRHEATAVAAARYRHDTALSTGAFSLRLNRNPNLTSGRFRLDTVTCSLDIGGNATIDEYDDGDTRNDTGEDGSDEEEEDGGVETEIEKMGKNRRRIRSKIVVKASLQSVWEVLTDYERLADFIPGLAVCQLLEKEPNFARLLQIGEQNLAFGLKFNAKGVIDCYEKDLEDLPTGQRRDIEFKMVEGDFKNFEGKWSIEQCKTGGDQELDSSLDEPFHTTLSYIVDVEPKLWLPVRLIEGRLCKEININLQSVRDEAQKVYLSSFSSY	At4g01650	XP_004229152.1	5	17	5	2.162	0.0139417	4	2	6	35.2	not assigned.unknown	M	26	4	Cp	none	Cp	Cp	42.1	plastid stroma	-	-
Solyc01g068030	-	Cyclase/dehydrase (AHRD V1 ***- B6T2Z5_MAIZE); contains Interpro domain(s) IPR005031 Streptomyces cyclase/dehydrase	MSAITAIPASTTMSATATSASASSSAHILRLNHKQLIFSLHGRRKSISASSSSFFSTYRFNSSISRSSRRISYPSSIRIRPLSPVMEWQDVTVKMEVDVPISVAYKCYSDREAIPEWMPFISTVKILEDKPDLSRWSLKYNAFGQNIEYSWLARNMQPTPNQKIHWRSLEGLPNRGAVRFFPKGPSSCIIELTVSYEVPQLLVPVASALKPFLENLLSQGLERFATFARIYSADTPK	At1g02475	XP_025886530.1	6	30	2	3.125	0.0201516	5	3	8	35.2	not assigned.unknown	Cp	92	1	Cp	Cp	Cp	Cp	100	plastid	plastid	-
Solyc10g085400	-	D-alanine--D-alanine ligase family (AHRD V1 ***- D7L782_ARALY); contains Interpro domain(s) IPR013817 Pre-ATP-grasp fold	MASSILINSISPCSKYLRCNRNYCFSASAALKGAISFPVKCSSSSNLSCERSCRFGIVRASCAEEVVVDNADHEIDDVERKVLRVGIICGGPSAERGISLNSARSVLDNIQCLSRGTICMLAAITLIATSMPLPYPLPSLAQGFRSLSDFtheLASSVDIVFPVIHGRFGEDGGIQELLERSNIPFVGTGSIQCQKAFDKYDASLELDRQGFVTVPNFLIQGNETDESGLSKWFEQNLLDIKSGKVVVKPTRAGSSIGVSVAYGVSDSLTKANRVISEGIDDKVLIEIFLEGGSEFTAIVLDVGSGFNCQPVVLLPTEE	At3g08840	XP_004249555.1	1	2	1	0.179	0.00115428	2	0	2	35.1	not assigned.no ontology	Cp	59	2	Cp	Cp	Cp	Cp	89.5	plastid	-	-
Solyc03g116570	-	DCC family protein; YuxK (AHRD V1 **-- B4AHQ1_BACPU); contains Interpro domain(s) IPR007263 Putative thiol-disulphide oxidoreductase DCC	MNMAITSSASYAGLTVTPPFHARFRRQFTPLATLSTPPNTSSSSRQVAVDWVEETASFFELDNRPIMLFDGVCNLCNGGVKFVRDNDNKRRIRYEALQSEAGKNLLRRSGRAPDDISSVVLVEKDRSYVKSEAVLKIMEYINLPFPQLAFFLQFVPLFIRDFAYDNVANNRYALFGRSESCEI	At1g52590	XP_004236013.1	1	3	1	0.389	0.00250847	3	3	6	35.2	not assigned.unknown	Cp	41	3	Cp	Cp	Cp	Cp	99.5	plastoglobules	plastid	-
Solyc01g097160	-	FAD dependent oxidoreductase (AHRD V1 ***- B7G7N7_PHATR); contains Interpro domain(s) IPR006076 FAD dependent oxidoreductase	MNSACNNPLLSSSFLHQPLKSSRFPNVSIFFPIISNPITPNRCIPIKTTIKGSMESRNPTKGRSTSPRKFKPRYGTSRRSTIKKSLSQEQVNFTKPIPDDPVVGIIGGGMSGLTCALYLEKRGIRSTVFDTGIHGLGGRMGTRMINADHQPLIFNADHAAQFFTVTNPKFAELVDDWLKRGLVREWKGTIGELEVGGNFVPFPSSPPKYIGVNGMRPLADSLLSQTSLVNVVRPCWVSALEPFNGTWHLSEKGKPCGQFDAIVIAHNGKCANRLLAASGLPLIAKQMKRLELSSIWALLAAFEDPLPTALNAASLPFEGAFVKGVESVSWMANNTKKLLASDSGPQCWTFFSTATFGKQNKVPQESIPNATGEKVKEAMLEGVEKALGLSKSSLQKPFY…	At3g04650	XP_025888114.1	7	15	7	4.012	0.0258715	5	3	8	35.2	not assigned.unknown	Cp	78	1	Cp	none	Cp	Cp	97.5	plastid	-	-
Solyc06g060880	-	FAD/NAD(P)-binding oxidoreductase family protein	MALSSSTLLLVKSHISLSSFSNPSLYFRRGETRLRVRPISLSIINARADERKEDIVIVGAGIAGLATAVSLQRLGIRTLVLEQGESLRTGGTSLTLFKNGWKALDAIGVGNDLRSQFLEIQGMAIKSEDGRELRSFRFKDEDESQEVRAVERRVLLETLASRLPPDAISFSSKLANIERSENGETLLKLEDGIRISAKILIACDGIRSPVAKLMGFPEPNYVGHCAFRGLAYFPEGQPFEPKVNYIYGKGVRAGYVPVSETKVYWFICYNSSSPGPKITDPSILRQQAEQLVKNWPTELINLINLTPDDTIIRTSLVDRWLWPSISPPASTGSIVLVGDAWHPMTPNLGQGACCALEDSIVLTKKLAEAIKSKRTSVEDAFKAYGSERWPRIFPLTVRA…	At2g35660	XP_004241987.1	6	10	6	0.638	0.00411415	5	3	8	26.7	misc.oxidases - copper, flavone etc	Cp	47	3	Cp	Cp	Cp	Cp	97.5	-	mitochondrion	-
Solyc03g044190	-	FAD-dependent oxidoreductase IPR006076 FAD dependent oxidoreductase	MDTNPQPKKVAVCGGGVignaVCTAYFLSKNGASVTLIEQSSVACAASGKAGGFLALDWCDGGPVASLARASFNLHRSLAQELNGSESYGYRPLTTLSVSITESSSSSSNRTGPIPSWVDGPAKSPRTIGSTDSTAQVHPEMFTKRLLSKAMEDYGVELVignaKVERVEMAEGKTRGVVLEDGREIDAAAIVLAVGPWSKRFSILGSLFRVYGIKAHSIVLEPKEANRITPHALFLTYYPAQGGKPMDPEVYPRPTGEVYICGMSAQAEVPDDPEQITPVPESINTLKRVASSVSSHLVEGEATVKAEQACILPCSEDDVPIIGEVPGVEGCYVATGHSCWGILNGPATGAAMAELILDGRASIVDLSRFSPARFASAVKK	At5g67290	XP_004234658.1	1	1	1	0.155	0.00099952	1	0	1	26.7	misc.oxidases - copper, flavone etc	-	-	2	-	none	Cp	Cp	61.36	plastid	plastid	-
Solyc05g055820	-	HAD-superfamily hydrolase IPR005834 Haloacid dehalogese-like hydrolase (Low-quality protein)	MAMKSMLSQIIQSVKYQMIEDELKLSNYLSWTFCSCIFGKRKPDPDFYLEVVKHLNVNVSNCIFVDDRMGNVEAAVKLGLKGLQFKDLLQKDLSLLGVDISTNESEDLIECSS	At1g79790	XP_010321332.1	3	6	3	1.683	0.0108529	4	0	4	35.1	not assigned.no ontology	S	-	5	-	none	Cp	C	98.47	plastid stroma	plastid	-
Solyc09g090750	-	HAD-superfamily hydrolase subfamily IA variant 1 (AHRD V1 ***- D2R0E7_PIRSD); contains Interpro domain(s) IPR005834 Haloacid dehalogese-like hydrolase	MHLLLSKASLFFNPRVIFSSSTTMATSTSISVSSKPRLKGIVFDMDGTLTVPVIDFQAMYRAVLGHDEYLAVKSKNPSGIDILHHIESWSPDKQRRAYEVIADYEKQGLDRLQIMPGAAELCSFLDSRNIRRGLITRNVKDAVDLFHERFGVKFSPALSREYRPYKPDPAPLLHICSTWEVQSNEVMMIGDSLKDDVACGKRAGAFTCLLDERGRYDAPEYANVQHKPDYKVSSLVEVQSLLERDFELTS	At2g33255	XP_004247776.1	3	9	3	0.778	0.00501695	5	3	8	35.1	not assigned.no ontology	S	-	5	Cp	M	Cp	Cp	54.9	-	mitochondrion	-
Solyc02g069410	-	HAD-superfamily hydrolase subfamily IA variant 3 containing protein expressed (AHRD V1 *-*- Q10I42_ORYSJ)	MAIERASCPVLNTLRFCTKNSSKLYNFPRKHLQFPSFFPRNFNSINGKLYTHGLFLNSSSSFSNTTQETPSQKLALLLEVEGVLMDVDRLGNRQAFNTAFRKLGLDCANWSQPVYQDLVKKSMGDEERMLVLFFNRIGWPTSLPTSEKETFMKTVLREKRIALDELVMSKTLPLRPGVEEFIDEACEEGVPVVMLTAYCKSGEKQVRSIIEKLGNDKMAKIKIIGTEEVKRSAYGQLVLGEGVASDLGEQLAKEARKAVSAEEQRIAKEVASILKLTVDIDTTSSEGLQNVVAALRAGAEYADVPVHNCVLVSGSLSGVAGAERIGMSCVVVRSSSTARAEFPGAKAIMDGFGGADLTISRLRQIQES	At5g45170	XP_004233201.1	9	31	9	4.08	0.02631	5	3	8	35.1	not assigned.no ontology	Cp	66	4	Cp	possibly Cp	Cp	M	54.8	plastid stroma	plastid	-
Solyc03g111610	-	HAD-superfamily hydrolase subfamily IA variant 3 containing protein expressed (AHRD V1 **** Q10I42_ORYSJ); contains Interpro domain(s) IPR005834 Haloacid dehalogese-like hydrolase	MALRVVSSSPAIFSSQRRAASVLPSTLTLPNTNSSLLSSSSPISSIDRTKSVVTLRSKTSRRSGVVTCSASVLPKALLFDCDGVLVDTEKDGHRISFNDTFSEKELGVTWDVDLYGELLKIGGGKERMTAYFNKVGWPENAPKTEEERKEFIAGLHKRKTELFMVLIEKKLLPLRPGVEKLIDQALGNGVKVAVCSTSNEKAVSAIVSCLLGPERAEQIQIFAGDVVPRKKPDPAIYLLAAETLAVDPSSCVVVEDSGIGLAAAKAAGMTCIVTKSGYTAEENFSNADAVFDCIGDPPEERFDLAFCGSLLEKQYVS	At3g48420	XP_004236312.1	13	122	13	16.191	0.104408	5	3	8	35.1	not assigned.no ontology	Cp	69	2	Cp	Cp	Cp	C	89.1	plastid stroma	plastid	plastid
Solyc11g009020	-	HAD-superfamily hydrolase subfamily IA variant 3 containing protein expressed (AHRD V1 **** Q10I42_ORYSJ); contains Interpro domain(s) IPR005834 Haloacid dehalogese-like hydrolase	MASSINLLISPPNSQYSFCSRNSLLFSPSITTFRRTLPSKSLSISASASSTRALEALIFDCDGVILESEHLHRQAYNDAFSHFNVRCPDNDDKPLNWSLEFYDVLQNQIGGGKPKMRWYFKENGWPTSTIFQHSPEDDNDRAKLIDTLQDWKTERYKEIIKSGTVEPRPGVLRLMDEAKAAGKMLAVCSAATKSSVVLCLENLIGLDRFHGLDCFLAGDDVKEKKPDPSIYITAAKKLGVSENNCLVVEDSVignaLQAATGAGMSCVITYTSSTADQDFKEAIAIYPDLSDVRFNDLESLVAK	At4g39970	XP_004250102.1	6	48	6	5.813	0.0374852	5	3	8	35.1	not assigned.no ontology	Cp	45	1	Cp	Cp	Cp	C	66.7	plastid stroma	plastid	plastid
Solyc12g038820	-	HAD-superfamily hydrolase subfamily IIA IPR005834 Haloacid dehalogenase-like hydrolase	MVIISNSSRRASTTLEKLRSLGFDPSLFIGAITSGELTHQYLQTRDDAWFASIGRSCIHMTWSDRGAISLEGLGLEVVEKVEEADFILAHGTEALGLSSGAAVPMNLDELEKILDQCAAKKIPMVVANPDFVTVEARSLRVMPGTLAATYEKLGGEVKWMGKPDKIIYKSAMEMASVVDASDCVAIGDSLHHDIKGANVAGIASAFITGGIHAAELGLGKFGEVVDDDNVHALALASYPTYVLPSFTW	At5g10460	XP_004252255.1	1	2	1	0.259	0.00167017	2	1	3	35.1	not assigned.no ontology	M	11	5	-	possibly M	Cp	M	56.86	-	plastid	-
Solyc07g006200	-	HD domain containing protein (AHRD V1 ***- B6TWI3_MAIZE); contains Interpro domain(s) IPR006674 Metal-dependent phosphohydrolase, HD region, subdomain	MSRVLCKSLIPSLLSSSSSSSISAQFRFKYFSTSSSSSSPRVSRMATEASSSSSSSASPSPSSAIDFLTLCHRLKTTKREGWVRRGVNNPESIANADHMYRMGVMALIAADLPGVDRDKCVKMAIVHDIAEAIVGDITPADGVPKDEKSRRERAALEDMCKLLGGGSRAKEISDLWMEYEENSSLEAKVVKDFDKVEMILQALEYENEQGKDLEEFFQSTAGKFQTEVGKAWASEVASRRKKSN	At1g26160	XP_004242640.1	5	24	5	4.995	0.0322103	5	3	8	35.1	not assigned.no ontology	Cp	70	2	Cp	Cp	Cp	N	56.3	plastid stroma	plastid	-
Solyc06g068220	-	Hydrolase alpha/beta fold family protein (AHRD V1 ***- D7KJH6_ARALY); contains Interpro domain(s) IPR000639 Epoxide hydrolase-like	MALSLLSPSPSTLCFLASTSSPSAEFTGQFPRLWTNRSRTGPALPVLTRASSEKDDNKPAFNPFGFVTDNPSSRSAIQMPESPAEDGNVGQMLYRTEDKGKEYGSYVKSGKFRWFVRETGSPESRRGTIVFLHGAPTQSYSYRVVMSQLSDAGFHCFAPDWIGFGFSDKPQPGYGFDYTEKEFHEEFEKLLEVLGVTSPFFLVVQGFLVGSYGLTWTLKNPSKILKLAILNTPLTVSSPIPGLFQQLRIPFFGEFTCQNAVMAERFIEAGSAYVLKLEKADVYRLPYLSSSGPGFALLEAAKRANFSETASQISSGFAAGSWDKPILVAWGISDKYLPQSIAEEFQKANPRSVELKLIEGAGHMPQEDWPEKVVDALRMFFRV	At1g52510	XP_004241692.1	7	44	7	9	0.0580367	5	3	8	35.1	not assigned.no ontology	Cp	49	1	Cp	Cp	Cp	Cp	96.1	plastid stroma	plastid	plastid
Solyc12g098660	-	Hydrolase alpha/beta fold family protein (AHRD V1 ***- D7LZC3_ARALY); contains Interpro domain(s) IPR000073 Alpha/beta hydrolase fold-1	MAITSCSTITISKFGFPVSFSQSIINKKISISSIPFCTKKYVPKKLFFSIKNPKSCGYISNSLVNDCSIDETSKENKTQVSIDVKTSTWNWKGYSIRYQYCGNSGPALVLVHGFGANSNADHWRKNLPVLAQSHRVFSIDLIGYGYSDKPNPRELGVENFYSFETWGSQLNDFCKDVignaDKAFFICNSIGGLVGLQAAILEPQLCRGILLLNISLRMLHITKQPWFGRPLIKAFQNLLRNTELGKFFFKSVATPKAVKNILCQCYYDTSQVTDELVQAILLPGLEPGAVDVFLEFICYSAGPLPEELLPQVKCPVLVAWGDKDPWEPIELGRAYGNFDTVEDFVVLPNVGHCPQDEAPHLVNPLVESFVARHANV	At5g19850	XP_004252974.1	1	1	1	0.155	0.00099952	1	2	3	35.1	not assigned.no ontology	Cp	55	3	Cp	Cp	Cp	G	57.5	-	plastid	-
Solyc02g062610	-	Hydrolase alpha/beta fold family protein (AHRD V1 ***- D7MBG9_ARALY); contains Interpro domain(s) IPR000073 Alpha/beta hydrolase fold-1	MSTSCATVGTEWLNPVGTRLALPGRNNHFRGKCELSRRGFTFNGIVAAGASVMTTSVVAEPSKGLERLPFKPEGYNYWTWRGHKIHYVVEGEGFPVVLIHGFGASAFHWRYNIPELAKKYKVYALDLIGFGWSEKALIDYDAFIWKDQVVDFLKEIVKEPSVLVGNSLGGFTALIAAASLTDEVKGVTLLNSAGQFGDASSAAEGTEETALQKFILKPLKEIFQRVVLGLVFWQSKQPARIESVLKSVYINSSNVDDYLIDSITRPAADPNAGEVYYRLMTRFISNQRKYTLNSVLRQLSCPLLLLWGDLDPWVGPAKANQIKEFYPNTTIVNLKAGHCPHDEVPELVNEALLDWLSATITPASSLETVSET	At4g36530	XP_004233528.1	3	4	2	0.778	0.00501695	2	3	5	35.1	not assigned.no ontology	Cp	46	4	Cp	none	Cp	M	96.5	plastid	plastid	-
Solyc05g012370	-	Hydrolase alpha/beta fold family protein (AHRD V1 ***- D7MJQ7_ARALY); contains Interpro domain(s) IPR000639 Epoxide hydrolase-like	MLTFFSAGTGGAPPPAFLLTGTNLKCSYSRRLTIRAGEFPDFLPIQIENIKDPYARKLASRIERIPVNLSKGCIMSSCVKPKEQTEANPVVLLHGFDSSCLEWRYTLPMLEDAGLETWAVDILGWGFSDLGRLPSCDVASKRNADHLYQLWSTHIKKPMVLVGPSLGSAVAIDFSVKYPEAVDRLVLIDASVYAEGTGNLATLPKAVAYAGVYLLKSLPLRLYATSLAFNGLPFSTCIDWTNIGRLHCSLPWWEDALVNFMISGGYNVISQIEHVKQKTLIIWGEDDQIIDNKLAVRLHCELPNAILRQIPKCGHIPHVEKPDAVSRLIADFVRPDQSQRANPDSVSTISVPS	At1g13820	XP_004239057.1	5	14	4	2.162	0.0139417	5	3	8	35.1	not assigned.no ontology	M	58	5	Cp	none	Cp	EX	58.5	-	-	-
Solyc09g047900	-	Hydrolase alpha/beta fold family protein (AHRD V1 ***- D7MVJ2_ARALY); contains Interpro domain(s) IPR000073 Alpha/beta hydrolase fold-1	MATLHSCSFSSLHSFPSVTLKYSRTQPRILRFNCRSSSDDKEDYLLDAPVSVGDGFSFSGGKYSDEPSPADEWFDRGKFVKAYPVSGTGEKAKDPIFGLTMGESSQASSDLFRWFCVESGSSNNSPILLIHGLPSQAYSYRKVLPMLENNYHAIALDWLGFGFSDKPQPKYGFDYTLDEYVASLESVINALTDKKVTLVVQGYFSAIAIKYASNHQEKLNGLILLNPPLTINHAKLPSSLSVLSNFLLGEIFCQDPLRASDKTLQSCGPYQIKEDVAMVYRRPYLTSGSAGFALNAISKAMKKQLKGYVEDTRAILMDNNWSVQTTVCWGQRDRWLSFDGVEDFCKESKHRLVELPMSGHHVQEDSGEELGQLIAGIVGKRSSL	At4g12830	XP_004246996.1	5	16	5	2.511	0.0161922	5	3	8	35.1	not assigned.no ontology	Cp	35	3	Cp	Cp	Cp	Cp	72.5	plastid	plastid	plastid
Solyc03g119200	-	L-Ala-D/L-amino acid epimerase	MDRIGLTQNFQTHCFFHFTASLRTQLSKVSNFTPNFKNPKVVTACMAAATPAVAPTATTFGFKNLMETVTIDVHKAEGRPLNVPLIAPFTIASSRLDKVENVAIRVELSNGCVGWGEAPILPFVTAEDQSIALAKAAEACEFLKQSREMTLNVALTKIGDVLPGHDFASVRAGVEMALIDAAANSIGIPLWRLFGGVSNAISTDITIPIVSPMEASELASKYRKQGFKTLKLKVGKNLNGDIEVLQSIRAAHPDCLFILDANEGYTANEAIKVLEKLHEMDVTPVLFEQPVHRDDWKGLGHVSQIAKDKYGVSVAADESCRSLVDAKKIVQESLADVINIKLAKVGVLGALEIIDLVRSSGLNLMIGGMVETRLAMGFAGHLAAGLGCFKFIDLDTPLL…	At3g18270	XP_004235785.1	3	8	3	0.638	0.00411415	4	3	7	26.1	misc.misc2	M	24	4	Cp	none	Cp	P	69.4	plastid stroma	plastid	-
Solyc07g008470	-	Macrophage migration inhibitory factor family protein IPR001398 Macrophage migration inhibitory factor	MPTLNLFTNLPVDAVIASDILKDATKAVAKIIGKPESYVMILLNGGVPIAFAGTEAPAAYGELISIGGLGPSVNGKLSSTIAEILQTKLSIDSDRFYIKFYDSPRPFFGFNGSTF	At5g57170	XP_004242799.1	1	4	1	1.154	0.00744159	2	0	2	35.1	not assigned.no ontology	-	-	3	-	none	not Cp	ER	50.07	-	plastid	-
Solyc10g076350	-	Macrophage migration inhibitory factor family protein IPR001398 Macrophage migration inhibitory factor	MPCLNISTNVNLEGVDTSSVLSEATSTVAKLIGKPEAYVMIVLKGSVPMAFGGTEQPAAYGELVSIGGLDVNKKLSAAIADILETKLSIPKSRFFLKFYDTKVCPSKSRICTMSSCYTPVLNADHGSFFGWNGSTF	At5g01650	XP_004249062.1	3	40	3	315.228	2.03275	5	3	8	35.1	not assigned.no ontology	-	-	2	-	none	Cp	ER	74.15	plastid	plastid	-
Solyc03g111700	-	Metallo-hydrolase/oxidoreductase superfamily protein	MAIDCKFVPYLTPKQIVFPFPATEKVTKFKLSPACCFPFLISSYSSSLPLRPTVISAYKKNVVESNYYEDTFTLTYLEGNSWLWEVGGIKILVDPILVGNLDFGIPWLYDAAKKFVKNFQLDDLPLIHCLLITQSLDNADHCHLNTLKPLSRKFPNLTVIATPNAKTLLDPLFTNVIYLEPGQDSAIEVSNGFQVKIKATAGPVLGPPWQRPENGYLVTSPKGALTLYYEPHCVYDKSTLEKHRADIVITPVIKQLLPNFTLVSGQEDAVQLAKCLFARFVVPMKNGDLDSKGLLASIVKSEGTMESFKQLLSKELPDAKVVEPTPGEPLDISIPVHGQ	At1g29700	XP_004236302.1	5	24	5	2.831	0.0182558	5	3	8	35.2	not assigned.unknown	-	-	3	Cp	none	Cp	G	52.8	plastid	plastid	-
Solyc02g067540	-	Methyltransferase (AHRD V1 *-*- B9LJG4_CHLSY); contains Interpro domain(s) IPR016065 Protein of unknown function methylase putative	MAVSSSHTAFSFLSPLRSHSIVPETSLLSFNPALVGYPFTATNrRNARPFIITVSSKSKNELSVDKKRQLLEQYGLNPDEYLSEPSPKTKKrRNAEQSKSGTGKQVLVEEPKHTRETHKLLQVVGGTArRNAKKLLSPKSMDVRPMMEVVKAAAFGILQAAGGCPASLRPGRWLDLYSGTGSVGIEAISRGCSEVHFVEMDPWVVSDVLRPNLEWTGFLDASVIHTVRVESFLERAEHFLGKDGSFDYISVTPPYAVVDYSILMDQISKSSIVGENTFILVEYPFRTDMLDSCGCLVKISDrRNAFGRTHLAIYGPKWALKKKYVEKTKRKQEKLDLLKEVEISAS	At3g28460	XP_004233343.1	1	1	1	0.179	0.00115428	1	0	1	29.2.2.3.3	protein.synthesis.ribosomal protein.prokaryotic.chloroplast.30S subunit.PSRP3	Cp	51	2	Cp	Cp	Cp	Cp	82.9	plastid	plastid	-
Solyc02g093550	-	Methyltransferase type 11 (AHRD V1 ***- C7QSM0_CYAP0); contains Interpro domain(s) IPR013216 Methyltransferase type 11	MFLTIVTHSHPKTWKSPNLHLFPLPSKTKTQPSIIITPKAYNNEDNNSTAGKIKRMVLTQQGRTKLNILPDKEFYAYPRFVTHVDDRFISNLTDLYRKCLKPEFEILDLMSSWVSHLPQEVKYKKVVGHGLQELAKNPKLDYFFVRDLNEDEKFEFENCSFDAVLCTVSVQYLQQPEKVFAEVFRILRPGGVFIVSFSNRLFYDKAISAWRDSTGYGRVQLVVQYFQCIKGFTEPQVIRKLPTNDDQQNKSPLSKIMQLIGLLSASSDPFYAVIAYRNFKPVHE	At3g01660	XP_004231829.1	1	1	1	0.122	0.000786719	1	0	1	35.1	not assigned.no ontology	Cp	25	5	Cp	none	not Cp	M	55	-	mitochondrion	-
Solyc06g084030	-	Methyltransferase like 7A (AHRD V1 ***- Q3KRE2_RAT); contains Interpro domain(s) IPR013216 Methyltransferase type 11	MAALGAAALLPIHPSHASDVSSPANPMAMLNRLHPPRPDWYEEFYATAMNTSMKSYEAEIEGYKSELFANLRGQAKQILEIGIGTGPNLKYYASEGGTSVYGVDPNRKMEKYAQAAAETAGLPAANFKFLHAVSESLPLRDASVDAVignaTLVLCSVSDVNLTLQEVRRVLKPGGIYLFVEHVAAADGTALRFVQGLLDPLQQAVADGCHFTRKTGKNISEAGFSNVDSRQVVLSTASLINPHIIGIARN	At1g69523	XP_004242352.1	4	8	4	2.728	0.0175916	4	0	4	26.6	misc.O-methyl transferases	Cp	16	4	-	none	Cp	C	51	-	-	-
Solyc07g025520	-	Methyltransferase type 11 IPR013216 Methyltransferase type 11	MHCFYFLFLKVLKNVEWPEQFPFKDEDFQRFDESSDTLFYEMPRFVTHIDDQAIAALTKYYSEVLPSSNTPGVAVLDMCSSWVSHYPAGFKQERIVGMGMNEEELKRVLTEYVVQDLNDNPKLPFGDNTFDVITNVVSVDYLTKPLDVFKEMSRVLKHGGLAIMSFSNRCFWTKAISIWTSTGDANADHVMIVGSYFHYAGGFEPPQAVDISPNTGRSDPMYIVYSRKIATA	At4g29590	XP_010323459.1	6	42	6	20.544	0.132478	5	3	8	35.2	not assigned.unknown	_	-	5	-	none	not Cp	C	98.96	plastid stroma	plastid	-
Solyc10g008020	-	Methyltransferase (AHRD V1 *-*- B8H501_CAUCN); contains Interpro domain(s) IPR013216 Methyltransferase type 11	MAFSFKLNTSNPSFFTITNNSIHDPLLKIAAKRRILGFKLSASSSSSSSSSSSSSRSAEVFEEGQLERPRWSGETPLSRLVGTLISIKPLFSILKLGARQVFISTAEKTNIPWTEMTKEILNSDVYKELESIENPAIVYPDYYLNPFHAYDEGNLSWLAAAEADAATMSMVRRAIPNASSLDEANQIVRGNWLDAIEKHHQQYSADFSIRDILDIGCSVGVSTGYLADRFPSAKVTGLDLSPYFLSVAQYKEKKRNQRKNPISWIHANGENTGLPSESFDLVSIPYVFHECPERAIRNIVKESFRLLRPGGTVAITDNSPKSKILQELPPVLFTLMKSTEPFLDEYYLTDLERVIKETGFANVQTVLTDPRHRTVTATVPY	-	XP_004248191.1	11	44	11	4.275	0.0275674	5	3	8	35.2	not assigned.unknown	Cp	56	2	Cp	Cp	Cp	C	68.1	-	-	-
Solyc01g067630	-	NAD(P)-binding Rossmann-fold superfamily protein	MATITSATSMIGIQCNFEPPQQHFFNRSIKCSLSIPPISSPKFTLHKLSLHAMPANSFRANASSAIDAPSEELEASSRGGIGANDLLIVGPGVLGRLVAERWREEYPGCQIFGQTMTTNADHHDELTKMGISPSSRETKFMFKFPYVIYCAPPSRTEDYPGDVRDAALKWSGEGSFLFTSSSAPYDCSDNGSVDEVMVP	At2g39080	XP_004229199.1	2	13	2	1.683	0.0108529	4	3	7	35.2	not assigned.unknown	Cp	59	1	Cp	Cp	Cp	Cp	96	plastid stroma	plastid	-
Solyc02g072160	-	NAD(P)-binding Rossmann-fold superfamily protein	MNPERKPQEQEWRESERGKLAFGKMESCYFSVTKPSSSSTILNFQGVSSLGGRSSQKSLGAPSHLSWPLSGPNKKSQNFVYRRKTFKGPILAEAGKQVNSMDSSGITLVTGATGGVGRRVVDVLRNKKLSVRVLVRNEEKARRMLGEDVDLVVGDVTKASTLLPEYFKGITSVIVSVIVGPKEGDTPDREKYSQGIKFFEPEIKGDSPEMVEYVGMKNLIVKKNLGIRTGKLLFGYEGNSFKELPWGALDDVVMGGVSQSTFQIDLTGGENGGPTGLFKGVVTTANNGGFASIRTKNFSEPEDLSAYDGLELRLKGDGRRYKLIVRTSSDWDTVGYTAIFDTVEGWQSVRLPFSSLRPIFRARTVLDASPFDPSQITSLQLMFSKFESDGKLNPTFKEG…	At4g18810	XP_010316841.1	11	84	11	3.047	0.0196486	5	3	8	30.11	signalling.light	_	-	4	-	none	Cp	N	56.3	plastid stroma	plastid	-
Solyc12g049280	-	NAD-dependent epimerase/dehydratase (AHRD V1 **-- Q3MEG2_AVT); contains Interpro domain(s) IPR016040 NAD(P)-binding domain	MGSLSICVNEPSKLLCFSSPCRQLWCRNLNWKSNKRSLTCFSSQKKIGFMDQILDYIEGGPKLRKWYGAPELLPKDGSLSEEDMSSEEDEVRDAVLVTDGDNEIGQMIILSLIIKRTRIKALVKDKRVAMEAFGTYVEPIAGDARDRSLLKKALSGVRAVICPNEGFISNLESWKGLQHVILLSQLSVYRGSSGVQAIVTANARKQAEQDESLVMASGIPYTIIRTGLLVNAPGGNQGFNIKEGCASQGKLSKEDAAFICVEALETVPQKGLTFEVVNGEDKVMDWKEWFATLIDK	At1g72640	XP_004252394.1	10	52	10	5.494	0.0354282	5	3	8	35.2	not assigned.unknown	Cp	39	2	-	possibly Cp	Cp	C	81.6	plastid	plastid	plastid
Solyc05g005480	-	NADPH-dependent alkenal/one oxidoreductase; Oxidoreductase zinc-binding dehydrogenase (AHRD V1 **** C2RQQ3_BACCE); contains Interpro domain(s) IPR002085 Alcohol dehydrogenase superfamily, zinc-containing	MEALLSSTTLQLKPLHPPSSFSSLHSPFSSISVLRVKGSKKAETFIQRSNFSTVLPLRVSASSQAAAAETSTSISIPSEMKAWSYTDYGSVDVLKLESNVAVPDIKEDQVLIKIVAAALNPVDFKrRNALGKFKATDSPLPTVPGYDVAGVVVKVGSQVKGLKEGDEVYGDIHEKALDGPKQFGSLAEYTAVEEKLVALKPKNLSFAEAAALPLAIETAYEGLEKAGFSSGKSILVLGGAGGVGSLVIQLAKHVFGASKVAATSSTGKLELLKSLGADLAIDYTKENFEDLPDKFDVVYDSVGQGEKAVKVVKEGGSVVVLTGAVTPPGFRFVVTSNGEMLKKLNPYLESGKVKPVIDPKGPFSFDKVVDAFSYLETgranaTGKVVIHPIP	At1g23740	NP_001296292.1	26	276	26	30.623	0.197473	5	3	8	26.7	misc.oxidases - copper, flavone etc	Cp	60	1	Cp	Cp	Cp	Cp	99.9	plastid stroma	plastid	plastid
Solyc08g062190	-	Nitrilase/cyanide hydratase and apolipoprotein N-acyltransferase superfamily	MRLGFLFLSSSSPVVGSSISRSIARPAPSLLLHHPFHFIPNRTTTNSNPFQFSPRSTLTASASSMASTFKPEQARVPPALQLPSPPITKFKIGLCQLSVTADKERNIAHARAAIEEAAEKGAKLVVLPEIWNSPYSNDSFPIYAEDIDAGPDASPSTAMLSEAARLLKITIVGGSIPEHSGDKLYNTCCVFDADGKLKAKHRKIHLFDIDIPGKITFKESQTLTAGETPTVVDTEVGRIGIGICYDIRFQELAMLYAARGAHLICYPGAFNMTTGPLHWELLQRARAVDNQLYVATCAPARDVDGGYVAWGHSTLIGPFGEVLATtheDEAIIISEIDYSQIELRRTNLPLEKQRRGDLYQLVDVQRSSSQ	At5g12040	XP_004245058.1	4	6	4	0.931	0.00600357	4	3	7	35.1	not assigned.no ontology	Cp	15	4	Cp	possibly ER	Cp	Cp	87.9	plastid stroma	plastid	-
Solyc10g009570	-	Rhodanese-like domain-containing protein 4	MKNVEFHKRFSLAILGHQNCQITIKLAHVIISTYLQPFTMGYQDFIKIPLAMEALARLTPVSVFSDRRNEPKKIPSFQFKNFPANLSRSVEGISRNVQGGLVLLSSVFNTGLAKALTYEEALQQSTTSTSSDFDAFVETLTDFVSDNPLVIAGGFAVLGLPFIVSQVFGKMPKPSWGVESAKKAYAKLADDVSSELVDIRATAELKQEGSPDIGAFKKKPVTIVYKGEDKTGFLNKLALKFKEPENTTLFILDKFDGNSELVAELVTANGFKSAYAIKDGAEGPRGWKNSGLPWILPKKTFSLDLGLSDVLDGLFGEGSDSVAVGLGVAAAAAFGLLVFSEAETLLQLLGSAGLIQLVSTKLLFAKDRKQSLQQVDEFLTKEIAPKELVGDIKQIGLAL…	At4g01050	XP_004248078.3	3	4	3	0.35	0.00225698	2	0	2	35.1.41	not assigned.no ontology.hydroxyproline rich proteins	Cp	-	1	Cp	possibly M	Cp	Cp	92.89	thylakoid	plastid	plastid
Solyc01g095670	-	Rhodanese-like domain-containing protein 4 (NCBI)	MEAINAVRLTPLSVRSDRKNEAKKIPSHPISFPFKNLCSVENLSRNVQGGLVLVSSVLNTGLAKALTYEETIEQSETIPGAEFDATAVVETVTTFASENPIIIAGGFAALALPIVLFQVLGKPPKSWGVESAKTAYAKLADDAGAQLLDIRATAELREVGTPDIRGLKKKPVTVVYKAEDKTGFLKKLSLKFKEPENTTLFILDKFDGNSELVAELVTENGFKAAYAIKDGAEGPRGWLNSSLPWILPKKTLGLDLSNLSDALDGVLGEGSDAVTVGLGVAAATGLGILAFSEVETILQLLGSAALVQLVSKKLLFAEDRKKTLQQVDEFLTTKVAPKELVDEIKQIGKALLPDSVSSNALPAPVEASPAAATSTVEETESVPKEDIAPPKVEAISPPT…	At4g01050	XP_010326928.1	4	11	4	0.624	0.00402388	5	3	8	35.1.41	not assigned.no ontology.hydroxyproline rich proteins	Cp	39	4	-	none	Cp	C	61.5	thylakoid	plastid	plastid
Solyc08g006830	-	S-adenosyl-L-methionine-dependent methyltransferases superfamily protein	MSNRMVLSYTNSFALFRPKFNGHFIPSIYHSDVLSLTRHVSSTTALSFCQLQASKHHDSAVTVASDVRYGSKQIISVDSTLYDYILTNVREPKILRELREETATMRGSQMQVSPDQAQLLAMLVQILGAKRCIEVGTYTGYSSLAVALVLPEGGHLVACDRDGKAIEVAKRYYDRAGVSHKVDVRHGLAADTLKSLIQNGESCRYDFAFVDAEKKMYQEYFELLLQLVRVGGLIVVDNVLWHGRVSDPLVNDSKTLSIRNFNENLMKDNRVDISMVPIGDGMTICRKR	At3g62000	XP_004244527.1	1	7	1	0.179	0.00115428	5	2	7	16.2.1.6	secondary metabolism.flavonoids.chalcones	M	40	3	Cp	Cp	Cp	Cp	72.7	-	-	-
Solyc03g118860	-	UDP-N-acetylglucosamine--N-acetylmuramyl-(pentapeptide) pyrophosphoryl-undecaprenol N-acetylglucosamine transferase (AHRD V1 **** D5BLI8_ZUNPS); contains Interpro domain(s) IPR006009 N-acetylglucosaminyltransferase, MurG	MLTAIYLPSSPSCRYFNTQFSVPKSLTLALSIQLQSRNLKISNCLSLNKPNNQSTNASGETAAGSDTLRIILAAGGTGGHIYPAIAIADDLNVLDPNAQILFVGLQTGMESTAVPTAGYSFEPIPAAPLGRPFFSLYNLFVLPFVLVKSLIKSSQILKEFKPHIVignaTGGFVSFPICLAASLKGIKLAIQEQNSVPGIANRVLSLFAYNVFVAFNSSVDWFWQKNKCVVCGNPVRLSLRQYASKAVGRRHFFSNAVVGKGDGKVVLILGGSLGANALNVAILHLYSEMLNERKDLFLIWQTGVLAYDEMESLVKFHPRLYITPFLHSMDLAYAAADLVVSRAGAMICTEILTAGKPSVLIPSPNVAEGHQFHNACLMADLVGSRVITEDELDSLTLK…	At1g73740	XP_004235800.1	1	3	1	0.212	0.00136709	3	0	3	26.1	misc.misc2	Cp	72	3	Cp	possibly Cp	Cp	V	87.1	-	-	-
Solyc01g008920	-	Uncharacterized protein; NAD(P)-binding Rossmann-fold superfamily protein	MASKISVSPFWNLPISTQKTQIFTQFPLLQHFTSSSRFNSSKLKSISYKSISLSAAVTEESQTSPPASSSPVSSSKLVLVVGGSGGVGQIVVASLLNRNVKLRLILRDPEKATTLFGEQDEEKLQVWKGDTRSPTGIDPSVFEGVTHVICCTGTTAFPSRRWDGDNTPERVDWDGVRNLVSALPKSLKRIVLVSSIGVTKFNELPWSIMNLFGVLKYKKMGEDFVRNSGLPFTIIRAGRLTDGPYTSYDLNTLLQATAGERRAVLIGQGDKLVGEVSRLVVAEACIQALDIDFTEGQTYEVNSIPGDGPGTDTLKWQELFRASHSN	At4g31530	XP_004228880.3	10	37	10	5.813	0.0374852	5	3	8	35.2	not assigned.unknown	Cp	54	1	Cp	Cp	Cp	Cp	100	plastid stroma	plastid	plastid
Solyc02g076950	-	UPF0052 domain protein (AHRD V1 **-- A1CBK9_ASPCL); contains Interpro domain(s) IPR002882 LPPG:FO 2-phospho-L-lactate transferase CofD/UPF0052	MADGYLGPSPLLKPSSLYTFPFTFSPFSGSPRSLSFSFMASNCSSARHCSCSSTSSSTTHQPSILVFSGGTAFNGVVEELKNLTTRVAHVLPVSDDGGSTAEIVRVLGGPAVGDIRSRCLRLSGQSTSEARAVRILLGHRLPLDARRAKSEWYEIVEGSHELWQDVSKPYRETIRAFLAYFQDQILRRSDEHFCFSNGSIGNFFFAGARIFFQSLDAAIFLFSRVSEIPAESFVLPVISTNERLTLGCELSAIHNISFQLVISA	At2g34090	XP_025885160.1	1	1	1	0.334	0.00215381	1	0	1	35.2	not assigned.unknown	Cp	86	2	Cp	Cp	Cp	Cp	99.8	-	-	-
Solyc05g007680	-	Uncharacterized protein with similarity to arabinanase/levansucrase/invertase	MAALKAINSITSPTRITKFTFLRNPTWFQPKPIFQHLKTKRIRLFPAKSSSKPNTNQENAADESLINDSISRIQPQPTSNQPPSPSISSFSRGLVFDLGQKDSWDSSEIGSPVVKRYLSDDEERWYMWYHGRDSNGKDsignalAVSSNGVHWERGEIVLNCGDNWWGFDTQSIRPCEVVIMSSAKVRANSSVYWLYYTGFGSEKIETLKDLDIPRFGNGDGEIYKSLPGLAMSQDGRHWARIEGEHHSGALFDVGLDGEWDSLFIGSPKVVYHSSGDLRMYYHSYDLEKGCFAIGIARSRDGMKWLKLGKILQGTSGFDELGVLKPHVIRNRKDGKYMMVYEGVDGNGRRSIGMAMSLDGLKGWRRVEECDPLLKRCEEGGWDSEGVGSPYLVEMDGD…	At1g26761	XP_004239391.1	10	27	10	4.275	0.0275674	5	2	7	27.3.69	RNA.regulation of transcription	Cp	48	3	Cp	M	Cp	M	73.9	-	-	-
Solyc09g010930	-	Uncharacterized protein; NAD(P)-binding Rossmann-fold superfamily protein	MADLNTSTVLVTGAGGRTGSIVYKKLKERSETYTARGLVRTEESKQKVGGADDVYIGDIRNIESLVPAIQGIDALVILTSAVPKMKPGYDPTKGGRPEFYFEDGANPEQVDWIGQKNQIDAAKAAGVKRIVLVGSMGGTNPNHPLNSLGNGNILIWKRKAEQYLADSGIPYTIIRAGGLQDKEGGIRELLVGKDDELLETETKTVARTDVAEVCIQALQYEEAKFKAFDLASKPEGTGTPTKDFKALFAQISTRF	At2g37660	XP_004246424.1	12	116	12	13.251	0.0854493	5	3	8	29.5	protein.degradation	-	-	3	-	none	Cp	Cp	87.5	plastid stroma	plastid	plastid
Solyc09g055910	-	Uncharacterized protein; contains Interpro domain(s) IPR006076 FAD dependent oxidoreductase	MAAMCYKISINSNINTNGLLSPPPNKLHSHLLLSNQKFCGRRTLASPPFSLIRSKKCWHGSLRVSNSSQSSASNSFDVVIVGAGIIGLTIARHLLLASDLSVALVDAAVPCSGATGAGQGYIWKAHKTPGTEKWDLMMRSHQLWESLAKRIQLQGMDPLEVLGWKKTGSLLVSKTTDESAILKRRVEELSQEGLRAEFLSSNDLLSEEPELVVEKEGGAAFFPDDYQLDAHRTVAFIEKGNRHFAVEGRYAEFYHEPAIGLVRHGNSCEVGAIQTSKNTLHSKKAVVIAAGCWTGSLMHDLIKQPDIDLDLPIKPRKGHLLVIENFKSFKLNHGIMEAGYTKHQSATLKATSSDSGPVYNAQDLSVSMTATMDASGNLVLGSSRQLVGFNTEVDESVIN…	At5g48440	XP_004247025.1	6	14	6	0.859	0.00359182	3	2	5	35.1	not assigned.no ontology	Cp	63	1	Cp	Cp	Cp	Cp	97.7	plastid stroma	plastid	-
A Names of tomato proteins were based on the literature, NCBI annotation (identified in BlastP searches), and/or SolyGenomics descriptor. In a small number of cases, tomato protein names were assigned based on NCBI annotations and the Arabidopsis homolog.
B Some Sol Genomics descriptors were updated when NCBI annotations and Arabidopsis gene annotations were aligned.
C Target P's subcellular locations are: chloroplast (Cp), mitochondria (M), secretory (S), and no predicted location is indicated by a dash (-).
D ChloroP was used to predict the presence of a chloroplast transit peptide (Y) and the lack of a predicted transit peptide is indicated with a dash (-).
E Predotar's predicted subcellular locations were: chloroplast/plastid (Cp),endoplasmic reticulum (ER) or mitochondrion (M). For proteins with localization predictions that were less clear, Predotar provided categorized of possibly Cp, M and ER. Proteins with unresolved locations or that did not have a homolog detected by Predotar are indicated with a dash (-).
F WoLF PSORT's and YLoc's predicted subcellular locations were: chloroplast/plastid (Cp), cytosol (C), cytoskeleton (Cy), endoplasmic reticulum (ER), extracellular (EX), golgi apparatus (G), mitochondrion (M), nucleus (N), peroxisomes (P), plasma membrance (PM), and vacuole (V). Proteins with no chloroplast location in WoLF PSORT are indicated by not Cp.The number of proteins predicted to be in t…

## Sheet: Table S4F. Misc Enzymes
Table S4F. Miscellaneous Enzymes
					Proteomics						Number of times detected			Bin codes		Algorithms								Databases
Tomato Gene ID	Gene nameA	DescriptionB	Protein Sequence	Arabidopis homolog	Tomato protein NCBI accession	Peptides	PSMs	Unique Peptides	emPAI	Mol%	Acetone samples	Gel samples	Total	Bincode	Name	TargetP C ver.1	Transit peptide length	TargetP (reliability class)	ChloroP D	Predotar E	WoLF PSORT F	YLoc F	YLoc % Confidence	PPDB	SUBA4	plprot
Solyc06g005720	-	Tropinone-reductase-like39 (AHRD V1 **-- B2BXL7_ARALY); contains Interpro domain(s) IPR002347 Glucose/ribitol dehydrogenase	MWESVLVLQVPSPSVKFKFQIPKPRNWSWMNKYSSIRCAGKVNRWSLDGMNALVTGGTRGIGHAIVEELCGLGATVHTCARNEDELEICLRSWKDEGFTVSGSLCDVSSQVDRQKLMEVVSSTFNGKLDILINNVGTNIRKAMVDFTAEEFSSVMATNFESVFHLCQLAYPLLKASGAGSVVFTSSVSGFVSLKSMSLQGATKGAINQLTKYLACEWAKDNIRSNAVAPWYIKTSMVEQVLSNKEYLQEVYDRTPLGRLGEPSEVSSLVGFLCLPASSYITGQIICVDGGMSVNGFYPHHD	At2g29260	XP_004240378.1	1	3	1	0.179	0.00115428	3	0	3	26.8	misc.nitrilases, *nitrile lyases, berberine bridge enzymes, reticuline oxidases, troponine reductases	Cp	37	4	Cp	Cp	Cp	Cp	86.7	-	-	-
Solyc04g007260	MKS2a	Methylketone synthase IIa	MSQCIASPLIRSIGSTSVGNSLLPNHRPPSTLPVSPHRQLLLPNLQLSVSKLRSFRAHAFDLKGSQGMAEFHEVELKVRDYELDQYGVVNNAIYASYCQHGRHELLERIGISADEVARSGDALALTELSLKYLAPLRSGDRFVVKARISDSSAARLFFEHFIFKLPDQEPILEARGIAVWLNKSYRPVRIPAEFRSKFVQFLRQEASN	At1g68260	NP_001334492.1 Yu et al (2010)	1	1	1	0.166	0.00107045	1	0	1	35.1	not assigned.no ontology	Cp	48	1	Cp	Cp	Cp	Cp	99.3	plastid	-	-
Solyc03g058860	-	3-dehydroquite synthase (AHRD V1 ***- B4FYZ3_MAIZE); contains Interpro domain(s) IPR002812 3-dehydroquite synthase, prokaryotic-type	MDILLPSLSHSFPKFAGKRQNCRKFLGINRVARMCAFTPSNSKKKTVWIWTENKQVMTAAVEGGWNTFIFPSNRQDLALEWSSIAVIHPVFIKEGRLINADHEHKSVAAFAEISSPQQLEQFQISEEQSDKVVVNLLDWQVIPAENIVAAFQGTQTTVLAVSKNQSEAQAFLEALEHGLGGVVMKVEDVGAILELKGYFDRRREVDSLLNLTKAIITHIQVTGMGDRVCVDICSLMRPGEGLLVGSFARGLFLVHSECLESNYISSRPFRVNAGPVHAYVAVPGGKTSYLSELKSGKEVIVVDQRGMQRTAIVGRVKVETRPLILVEAKVESENESYSILLQNAETVGLVSPLHGEGHQRTTIPVTSLEVGSEVLLLLQGGARHTGIEIKEFIVEK	At3g28760	XP_004234776.1	7	27	7	2.415	0.0155732	5	3	8	35.2	not assigned.unknown	Cp	57	3	Cp	none	Cp	C	77	-	plastid	-
Solyc08g014360	CAD6	cinnamyl alcohol dehydrogenase-like protein (AHRD V1 **** A9PHZ1_POPTR); contains Interpro domain(s) IPR002085 Alcohol dehydrogenase superfamily, zinc-containing	MPLSPSILKSLTSPTISPMAKSTPKLTQSALGWAAQDSSGKLTPFMFKrRNAENGLDDVTIKILYCGMCRTDVHFAKNDWGNTTYPIVPGYEIIGIVIKVGSNVSKFKVGERVGVGYVAATCLDCELCNSFQENYCDQMKPVYNSIHWDDTPTYGGYSTIMVANADHRYVVHIPDSLPMDRAAPLMGAGLTVYTAMKNSNLFESPGKHMAVignaLGGVGHMAIKFGKAFGHHVTVISTSPSKEKDAKEKLDADGFILSTDLKQMQRNrRNASLDFIIDTVSAKHSLGPYLELLKVNGTISIVGEPAQPIEVLATPLIYGKKVVRGSIIGSVKELQEMMNFCGKHNILCEIELVTIDKINEAFDRLSKNDVKFRFVLNVAAHQYSSRL	At4g39330	XP_025888310.1	1	2	1	0.116	0.000748028	2	0	2	16.2.1.10	secondary metabolism.flavonoids.chalcones	Cp	17	2	Cp	Cp	Cp	Cp	79.3	-	-	-
Solyc06g053310	GLX2	Hydroxyacylglutathione hydrolase 2 (AHRD V1 **** B6T9Z9_MAIZE); contains Interpro domain(s) IPR017782 Hydroxyacylglutathione hydrolase	MRTFSKIAPSAMASFPCSKSRTGVCVWPGMRQLSLRKNLLYGFMQLLSMPFKTVRGVSRSLRVSKLCSITSTSSSLQIELVPCLQDNYAYLLHDVDTGTVGVVDPSEAVPVIDALSRNNRNLTYILNTHHHHNADHTGGNMELKARYGAKVignaSGVDSDRIPGIDIALNDGDQWMFAGHEVFVMETPGHTRGHISFYFPRSKAVFTGDTLFSLSCGKLFEGTPEQMLSSLGKITSLPDDTNVYCGHEYTLSNSKFALSIEPGNEELQSYAAHVANLRRKGLPTIPTTLKAEKLCNPFLRTSSTEIRKLLNIPATADDGEALGAIRRAKDNF	At1g06130	XP_004240981.1	5	17	5	2.511	0.0161922	5	3	8	24.1	Biodegradation of Xenobiotics.hydroxyacylglutathione hydrolase	Cp	58	1	Cp	possibly M	Cp	M	99.5	plastid stroma	mitochondrion	-
Solyc07g040950	-	Glyoxalase IPR004360 Glyoxalase_bleomycin resistance protein_dioxygenase	MDMLAKDSVGTDAVDDKDFGVVCMHHVGILCENLERSLDFYQNILGLEINEARPHDKLPYRGAWLWVGSEMIHLMELPNPDPYTGRPEHGGRDRHTCIAIRDVSKLKAILDKAGIPYTLSRSGRPAIFTRDPDTLEFTQVDA	At5g57040	XP_004243741.1	1	3	1	0.468	0.00301791	3	0	3	24.2	Biodegradation of Xenobiotics.lactoylglutathione lyase	-	-	2	-	none	not Cp	C	97.73	plastid	plastid	-
Solyc08g066850	-	Lactoylglutathione lyase (AHRD V1 ***- B6SSK1_MAIZE); contains Interpro domain(s) IPR004361 Glyoxalase I	MALQIFSPKIQQPLKSIFPSPTNNGCGIIVPSAYNSSRRLALFQLVITQSQLFNGKAPESLSAEGKVIESGMVAELAQSNIALNDETASEWIKKDKRRMLHVVYRVGNLDKTIKFYRECLGMKLLRQRDIPEEGYSNAFLGYGPEESNFSVELTYNYGVDKYDIGTGFGHFGIAVDDVAKMVDLVKAKGGKIVQEPGPAKDGGPIVSLVEDPDGYNFELLERGPTLEPFRQVMLRVGDLDQSINFYKKAFGMELLRKRDNPDNKNTIAIMGYGPEDKNTVLELTYMYGVKSYDKGNGYAQIAVGTDDVYKTAEAIKLYGGEIVLEPGPLPGINTKIMACIDPDGWKTVFVDNADFMKELE	At1g67280	XP_004245182.1	14	89	12	11.452	0.0738484	5	3	8	24.2	Biodegradation of Xenobiotics.lactoylglutathione lyase	Cp	69	2	Cp	possibly Cp	Cp	C	94.3	thylakoid-peripheral-stromal-side; plastid stroma	plastid	plastid
Solyc12g007310	-	Lactoylglutathione lyase (AHRD V1 **** B6SSK1_MAIZE); contains Interpro domain(s) IPR004361 Glyoxalase I	MVRILPMASSIRPSLSSLKFSGSARFSVSHFSHNSTRKFTYCHLGTAVPQVQSFGLKASKLLREKGGCLSISAAGNMTHASTASTQENVLEWVKQDKRRMLHVVYRVGDLDRTIKFYTECLGMKLLRKRDIPEERYTNAFLGYGPEDSHFVIELTYNYGVDQYDIGSGFGHFGIAVDDVSKTVELIKAKGGKVTREPGAVKGGKTVIAFIEDPDGYKFELLERGPTPEPLCQVMLRVGDLERAISFYENAYGMKLLRTRDNPEYKYTIAMLGYGPEDTSAVMELTYNYGVTEYDKGNAYAQIAIGTDDVYKTAEAIRLCGGKITREPGPLPGISTKITACLDPDGWKTVFVDNIDFLKELE	At1g67280	XP_001334598.1	10	52	7	4.012	0.0258715	5	3	8	24.2	Biodegradation of Xenobiotics.lactoylglutathione lyase	Cp	79	3	Cp	M	Cp	C	55.3	thylakoid-peripheral-stromal-side; plastid stroma	plastid	plastid
Solyc11g069040	-	Lactoylglutathione lyase IPR004361 Glyoxalase I	MASESKDSPSNNPGLHATPDEATKGYFLQQTMFRIKDPKVSLEFYSKVLGMSLLKRLDFPEMKFSLYFMGYEDTASAPSDPVERTAWTFSQKSTLELTHNWGTESDPNFTGYHNGNSEPRGFGHIGVTVDDVYKACERFESLGVEFVKKPLDGKMKGIAFIKDPDGYWIEIFDTKIIKDAAGSAS	At1g08110	NP_001303895.1	2	4	2	0.425	0.00274062	3	3	6	13.2.3.2	amino acid metabolism.degradation.aspartate family.threonine	-	-	2	-	none	not Cp	C	89.76	-	peroxisome	-
Solyc05g043430	-	Carboxymethylenebutenolidase-like protein (AHRD V1 ***- Q8LQS5_ORYSJ); contains Interpro domain(s) IPR002925 Dienelactone hydrolase	MISTCSRIFSSGFLTVNKPTHTTRARTLIHRLSGYCFQLRAMADSATPFKKVQIQRDDTTFDAYVignaKDDAPGIVVLQEWWGVDFEIKNHAEKISQFDSGFKALIPDLYRGKVGLDVAEAQHLMDGLDWQGAVKDIQASVNWLKSNGSKKVGVTGYCMGGALAIASSVLVPEVNAVVAFYGVPSPELADPVNAKAPVQAHFGEDDAFVGFSDVKSITTSP	At2g32520	XP_004240152.1	2	3	2	0.668	0.00430761	2	2	4	26.1	misc.misc2	Cp	40	5	Cp	possibly M	Cp	Cp	94.4	-	cytosol	-
Solyc11g027840	-	Carboxymethylenebutenolidase homolog (AHRD V1 ***- C1BWH0_ESOLU); contains Interpro domain(s) IPR002925 Dienelactone hydrolase	MESALVCSTAPRTTTSSLLKKRETPLDAPFGLSFSRNYVKCWGISLSLRKTKKYKVFNCNVKVEDEACELVNGVELSIGDGVDSIDAYLCNAVRNNNGTGILLLSDIFGFEDSFTRDFSYRVACNGYNVLVPDMFRGNPWRKDESKALFEQWIGSVDKQQVVRDIFTSTKWMANEFVAAGISKKFGVignaFCFGGGVLIDILAQDKGSEFGVGISFYGTRIDLSVTSKIEVPLLLIAGDSDPLCPVNVLKEVENNANGCKMAIFEGRGHDFAHRPQSLEDDKDAEEAFLMMRNWLHDGLHSEN	At1g35420	XP_004250633.1	2	4	2	0.334	0.00215381	3	2	5	26.1	misc.misc2	Cp	6	4	-	Cp	not Cp	Cp	96.4	plastid stroma	plastid	plastid
A Names of tomato proteins were based on the literature, NCBI annotation (identified in BlastP searches), and/or SolyGenomics descriptor. In a small number of cases, tomato protein names were assigned based on NCBI annotations and the Arabidopsis homolog.
B Some Sol Genomics descriptors were updated when NCBI annotations and Arabidopsis gene annotations were aligned.
C Target P's subcellular locations are: chloroplast (Cp), mitochondria (M), secretory (S), and no predicted location is indicated by a dash (-).
D ChloroP was used to predict the presence of a chloroplast transit peptide (Y) and the lack of a predicted transit peptide is indicated with a dash (-).
E Predotar's predicted subcellular locations were: chloroplast/plastid (Cp),endoplasmic reticulum (ER) or mitochondrion (M). For proteins with localization predictions that were less clear, Predotar provided categorized of possibly Cp, M and ER. Proteins with unresolved locations or that did not have a homolog detected by Predotar are indicated with a dash (-).
F WoLF PSORT's and YLoc's predicted subcellular locations were: chloroplast/plastid (Cp), cytosol (C), cytoskeleton (Cy), endoplasmic reticulum (ER), extracellular (EX), golgi apparatus (G), mitochondrion (M), nucleus (N), peroxisomes (P), plasma membrance (PM), and vacuole (V). Proteins with no chloroplast location in WoLF PSORT are indicated by not Cp.The number of proteins predicted to be in t…
