# Supplementary material for: The tomato chloroplast stromal proteome compendium elucidated by leveraging a plastid protein-localization prediction Atlas
Source: Front Plant Sci. 2023 Aug 28;14:1020275. doi: 10.3389/fpls.2023.1020275 (PMC10493611; doi:10.3389/fpls.2023.1020275)
Supplement: Supplementary file 7 [file Table_5.xlsx]

## Sheet: Table S5A -Cp genome
Table S5A: Chloroplast-genome encoded proteins detected in the tomato stromal proteome.
	Gene and protein descriptors and accessions				ProteomicsB					Number of times detected			Mapman Bins		Databases
Category	Gene ID	Gene nameA	Protein Descriptor	Arabidopis homolog	Peptides	PSMs	Unique Peptides	emPAI	Mol%	Acetone samples	Gel samples	Total	Bincode	Name	PPDB	SUBA4
Miscellaneous	544163621	RBCL	RuBisco large chain	Atcg00490	31	1339	27	1614.6	10.4118	5	3	8	1.3.1	PS.calvin cycle.rubisco large subunit	plastid stroma	plastid
	544163637	CLPP1	Clp protease proteolytic subunit P1	Atcg00670	4	40	4	38.811	0.250273	5	3	8	29.5	protein.degradation	plastid stroma	plastid
	544163622	AccD	Acetyl-CoA carboxylase carboxyltransferase beta subunit	Atcg00500	11	33	11	3.642	0.0234855	5	2	7	11.1.1.2.2	lipid metabolism.FA synthesis and FA elongation.Acetyl CoA Carboxylation.heteromeric Complex.beta Carboxyltransferase	plastid stroma	plastid
Light reactions	544163593	PSBA	PS II protein D1	Atcg00020	2	3	2	0.668	0.00430761	2	2	4	1.1.1.2	PS.lightreaction.photosystem II.PSII polypeptide subunits	thylakoid-integral	plastid
	544163638	PSBB	PS II CP47 chlorophyll apoprotein	Atcg00680	2	3	2	0.52	0.00335323	2	1	3	1.1.1.2	PS.lightreaction.photosystem II.PSII polypeptide subunits	thylakoid-integral	plastid
	544163609	PSBC	PS II CP43 chlorophyll apoprotein	Atcg00280	1	1	1	0.212	0.00136709	1	1	2	1.1.1.2	PS.lightreaction.photosystem II.PSII polypeptide subunits	thylakoid-integral	plastid
	544163608	PSBD2	PS II protein D2	Atcg00270	1	1	0		0	0	1	1	1.1.1.2	PS.lightreaction.photosystem II.PSII polypeptide subunits	thylakoid-integral	plastid
	544163630	PSBE	PS II cytochrome b559 alpha subunit	Atcg00580	1	1	1	<0.038	0	1	0	1	1.1.1.2	PS.lightreaction.photosystem II.PSII polypeptide subunits	thylakoid-integral	plastid
	544163613	PSAA	PS I P700 apoprotein A1	Atcg00350	1	1	1	0.155	0.00099952	1	0	1	1.1.2.2	PS.lightreaction.photosystem I.PSI polypeptide subunits	thylakoid-integral	plastid
	544163612	PSAB	PS I P700 apoprotein A2	Atcg00340	3	8	2	1.154	0.00744159	4	0	4	1.1.2.2	PS.lightreaction.photosystem I.PSI polypeptide subunits	thylakoid-integral	plastid
	544163665	PSAC	PS I subunit VII	Atcg01060	1	10	1	0.778	0.00501695	5	3	8	1.1.2.2	PS.lightreaction.photosystem I.PSI polypeptide subunits	thylakoid-peripheral-stromal-side	plastid
	544163614	YCF3	PS I assembly protein ycf3	Atcg00360	3	18	3	1.683	0.0108529	5	2	7	29.8	protein.assembly and cofactor ligation	thylakoid-peripheral-stromal-side	plastid
	544163642	PETB	Cytochrome b6	Atcg00720	1	2	1	0.468	0.00301791	1	0	1	1.1.3.3	PS.lightreaction.cytochrome b6/f.cytochrome b6 (CYB6)	thylakoid-integral	plastid
	544163626	PETA	Cytochrome f	Atcg00540	8	24	4	3.394	0.0218863	5	3	8	1.1.3.4	PS.lightreaction.cytochrome b6/f.apocytochrome f (CYF)	thylakoid-integral	plastid
	544163670	NDHH	NADH-plastoquinone oxidoreductase subunit 7	Atcg01110	11	47	11	9	0.0580367	5	3	8	1.1.40	PS.lightreaction.cyclic electron flow-chlororespiration	thylakoid	plastid
	544163668	NDHI	NADH-plastoquinone oxidoreductase subunit I	Atcg01090	4	20	3	2.162	0.0139417	5	2	7	1.1.40	PS.lightreaction.cyclic electron flow-chlororespiration	thylakoid-peripheral-stromal-side	plastid
	544163616	NDHJ	NADH-plastoquinone oxidoreductase subunit J	Atcg00420	6	20	6	6.499	0.0419089	5	3	8	1.1.6	PS.lightreaction.NADH NADH	thylakoid	plastid
	544163599	ATPF	ATP synthase CF0 subunit I	Atcg00130	4	11	4	1.424	0.00918269	5	2	7	1.1.4.8	PS.lightreaction.ATP synthase.subunit B (ATPF)	thylakoid-integral	plastid
	544163619	ATPE	ATP synthase CF1 epsilon subunit	Atcg00470	4	79	4	99	0.638403	5	3	8	1.1.4.3	PS.lightreaction.ATP synthase.epsilon chain	thylakoid-peripheral-stromal-side	plastid
	544163620	ATPB	ATP synthase CF1 beta subunit	Atcg00480	30	1094	28	2153.43	13.8865	5	3	8	1.1.4.2	PS.lightreaction.ATP synthase.beta subunit	thylakoid-peripheral-stromal-side	plastid
	544163598	ATPA	ATP synthase CF1 alpha subunit	Atcg00120	22	673	22	78.433	0.505777	5	3	8	1.1.4.1	PS.lightreaction.ATP synthase.alpha subunit	thylakoid-peripheral-stromal-side	plastid
Plastid-endoded RNA polymerase	544163644	RPOA	RNA polymerase alpha subunit	Atcg00740	4	6	4	1.154	0.00744159	4	0	4	27.2	RNA.transcription	plastid nucleoid	plastid
	544163605	RPOB	RNA polymerase beta subunit	Atcg00190	6	14	5	0.551	0.00355313	5	0	5	27.2	RNA.transcription	plastid nucleoid	plastid
	544163604	RPOC1	RNA polymerase beta subunit	Atcg00180	6	6	6	0.425	0.00274062	1	0	1	27.2	RNA.transcription	plastid nucleoid	plastid
Translation	544163603	RPOC2	RNA polymerase beta' subunit	Atcg00170	10	16	9	0.396	0.00255361	4	0	4	27.2	RNA.transcription	plastid nucleoid	plastid
	544163602	RPS2	Ribosomal protein S2	Atcg00160	5	14	4	2.981	0.019223	5	2	7	29.2.1.1.1.1.2	protein.synthesis.ribosomal protein.prokaryotic.chloroplast.30S subunit.S2	plastid ribosome	plastid
	544163651	RPS3	Ribosomal protein S3	Atcg00800	13	61	13	14.849	0.0957541	5	3	8	29.2.1.1.1.1.3	protein.synthesis.ribosomal protein.prokaryotic.chloroplast.30S subunit.S3	plastid ribosome	plastid
	544163615	RPS4	Ribosomal protein S4	Atcg00380	9	43	8	17.738	0.114384	5	3	8	29.2.1.1.1.1.4	protein.synthesis.ribosomal protein.prokaryotic.chloroplast.30S subunit.S4	plastid ribosome	plastid
	544163674	RPS7	Ribosomal protein S7	Atcg00900	8	32	7	9	0.0580367	5	3	8	29.2.1.1.1.1.7	protein.synthesis.ribosomal protein.prokaryotic.chloroplast.30S subunit.S7	plastid ribosome	plastid
	544163648	RPS8	Ribosomal protein S8	Atcg00770	6	31	6	4.337	0.0279672	5	3	8	29.2.1.1.1.1.8	protein.synthesis.ribosomal protein.prokaryotic.chloroplast.30S subunit.S8	plastid ribosome	plastid
	544163660	RPS12	Ribosomal protein S12	Atcg00905	1	1	1	0.778	0.00501695	1	0	1	29.2.1.1.1.1.12	protein.synthesis.ribosomal protein.prokaryotic.chloroplast.30S subunit.S12	plastid ribosome	plastid
	544163611	RPS14	Ribosomal protein S14	Atcg00330	3	26	3	6.197	0.0399615	5	3	8	29.2.1.1.1.1.14	protein.synthesis.ribosomal protein.prokaryotic.chloroplast.30S subunit.S14	plastid ribosome	plastid
	544163671	RPS15	Ribosomal protein S15	Atcg01120	10	26	10	629.957	4.06229	5	0	5	29.2.1.1.1.1.15	protein.synthesis.ribosomal protein.prokaryotic.chloroplast.30S subunit.S15	plastid ribosome	plastid
	544163595	RPS16	Ribosomal protein S16	Atcg00050	5	14	5	30.623	0.197473	5	2	7	29.2.1.1.1.1.16	protein.synthesis.ribosomal protein.prokaryotic.chloroplast.30S subunit.S16	plastid ribosome	-
	544163635	RPS18	Ribosomal protein S18	Atcg00650	3	18	3	2.162	0.0139417	5	3	8	29.2.1.1.1.1.18	protein.synthesis.ribosomal protein.prokaryotic.chloroplast.30S subunit.S18	plastid ribosome	plastid
	544163653	RPS19	Ribosomal protein S19	Atcg00820	6	56	6	999	6.44207	5	3	8	29.2.1.1.1.1.19	protein.synthesis.ribosomal protein.prokaryotic.chloroplast.30S subunit.S19	plastid ribosome	plastid
	544163649	RPL14	Ribosomal protein L14	Atcg00780	7	40	7	14.849	0.0957541	5	3	8	29.2.1.1.1.2.14	protein.synthesis.ribosomal protein.prokaryotic.chloroplast.50S subunit.L14	plastid ribosome	plastid
	544163650	RPL16	Ribosomal protein L16	Atcg00790	4	18	4	9	0.0580367	3	0	3	29.2.1.1.1.2.16	protein.synthesis.ribosomal protein.prokaryotic.chloroplast.50S subunit.L16	plastid ribosome	plastid
	544163654	RPL2	Ribosomal protein L2	Atcg01310	7	40	6	5.494	0.0354282	5	0	5	29.2.1.1.1.2.2	protein.synthesis.ribosomal protein.prokaryotic.chloroplast.50S subunit.L2	plastid ribosome	plastid
	544163636	RPL20	Ribosomal protein L20	Atcg00660	5	12	5	3.642	0.0234855	2	0	2	29.2.1.1.1.2.20	protein.synthesis.ribosomal protein.prokaryotic.chloroplast.50S subunit.L20	plastid ribosome	plastid
	544163652	RPL22	Ribosomal protein L22	Atcg00810	3	7	3	4.995	0.0322103	1	0	1	29.2.1.1.1.2.22	protein.synthesis.ribosomal protein.prokaryotic.chloroplast.50S subunit.L22	plastid ribosome	plastid
	544163678	RPL23	Ribosomal protein L23	Atcg01300	5	19	5	145.78	0.940065	2	0	2	29.2.1.1.1.2.23	protein.synthesis.ribosomal protein.prokaryotic.chloroplast.50S subunit.L23	plastid ribosome	plastid
	544163662	RPL32	Ribosomal protein L32	Atcg01020	1	3	1	1.154	0.00744159	1	0	1	35.2	not assigned.unknown	plastid ribosome	plastid
	544163634	RPL33	Ribosomal protein L33	Atcg00640	1	1	1	0.778	0.00501695	1	0	1	29.2.1.1.1.2.33	protein.synthesis.ribosomal protein.prokaryotic.chloroplast.50S subunit.L33	plastid ribosome	plastid
A Names of tomato proteins were based on the literature, NCBI annotation (identified in BlastP searches), and/or SolyGenomics descriptor. In a small number of cases, tomato protein names were assigned based on NCBI annotations and the Arabidopsis homolog.
B Proteins were identified by acetone preparations and/or the gel method. For emPAI and Mol% calculations, only the data from the acetone prepartions were used. Proteins identified solely by the gel method have data for the number of peptides, PSMs and unique peptides.

## Sheet: Table S5B- PSII 
Table S5B.PSII and associated proteins detected in the tomato stromal proteome
	Gene and protein descriptors and accessions						ProteomicsA					Number of times detected			Algorithms								Databases
Category	Tomato Gene ID	Gene nameB	DescriptionC	Protein Sequence	Arabidopis homolog	Tomato proteinC NCBI accession	Peptides	PSMs	Unique Peptides	emPAI	Mol%	Acetone samples	Gel samples	Total	TargetP D ver.1	Transit peptide length	TargetP (reliability class)	ChloroP E	Predotar F	WoLF PSORT G	YLoc G	YLoc % Confidence	PPDB	SUBA4	plprot
Light-harvesting complex	Solyc09g014520	-	Chlorophyll a/b binding protein CP29.1, chloroplastic (NCBI). Similar to AtLHCB4.2	MATAAATSSFIGTRLPEIHSGSGRVQARFGFGQKKAAPKKAAKKQIPDRPLWYPGAKAPEYLDGSLVGDYGFDPFGLGKPAEYLQFDLDSLDQNLAKNLAGDIIGTRTEVADVKSTPFQPYSEVFGLQRFRECELIHGRWAMLATLGALTVEWLTGITWQDAGKVELVEGSSYLGQPLPFSITTLIWIEVLVignaYIEFQRNAELDPEKRLYPGGSFFDPLGLAADPEKKATLQLAEIKHARLAMVAFLGFAVQAAATGKGPLNNWATHLSDPLHTTIFDTFGFFS	At3g08940	XP_004246325.1	3	5	3	0.778	0.00501695	2	0	2	Cp	35	4	-	Cp	Cp	Cp	100	thylakoid-integral	plastid	-
	Solyc12g011450	CAB13 LHCB13	Chlorophyll a/b binding protein 13, chloroplastic ; Similar to AtLHCB3	MASMAATASSTTVVKATPFLGQTKNANPLRDVVAMGSARFTMSNDLWYGPDRVKYLGPFSAQTPSYLNGEFPGDYGWDTAGLSADPEAFAKNRALEVIHGRWAMLGALGCIFPEVLEKWVKVDFKEPVWFKAGSQIFSDGGLDYLGNPNLVHAQSILAVLGFQVVLMGLVEGFRINGLPGVGEGNDLYPGGQYFDPLGLADDPTTFAELKVKEIKNGRLAMFSMFGFFVQAIVTGKGPLENLLNADHLDNPVANNAWVYATKFVPGA	At5g54270	NP_001296244.1 Schwartz et al 1991	1	1	0	-	0	0	1	1	Cp	33	3	Cp	Cp	Cp	Cp	100	thylakoid-integral	plastid	plastid
	Solyc02g070980	CAB1A LHCB1A	Chlorophyll a/b binding protein; Similar to AtLHCB1 or 1.4	MAAAAMALSSPSFAGQAVKLSPSASENSGNGRITMRKAVAKSAPSSSPWYGPDRVKYLGPFSGESPSYLTGEFPGDYGWDTAGLSADPETFAKNRELEVIHCRWAMLGALGCVFPELLARNGVKFGEAVWFKAGSQIFSEGGLDYLGNPSLVHAQSILAIWACQVVLMGAVEGYRIAGGPLGEVVDPLYPGGSFDPLGLAEDPEAFAELKVKEIKNGRLAMFSMFGFFVQAIVTGKGPLENLANADHLADPVNNWAFATNFVPGK	At2g34430	NP_001316869.1 Pichersky et al 1985	2	4	0	-	0	0	3	3	Cp	23	2	Cp	Cp	Cp	Cp	100	thylakoid-integral	plastid	plastid
	Solyc02g070940	CAB1B LHCB1B	Chlorophyll a/b binding protein; Similar to AtLHCB1 or 1.4	MAAATMALSSPSFAGQAVKLSPSASEISGNGRITMRKAVAKSAPSSSPWYGPDRVKYLGPFSGESPSYLTGEFPGDYGWDTAGLSADPETFAKNRELEVIHCRWAMLGALGCVFPELLARNGVKFGEAVWFKAGSQIFSEGGLDYLGNPSLVHAQSILAIWACQVVLMGAVEGYRIAGGPLGEVVDPLYPGGSFDPLGLAEDPEAFAELKVKEIKNGRLAMFSMFGFFVQAIVTGKGPLENLANADHLADPVNNNAWAFATNFVPGK	At2g34430	NP_001316856.1 Pichersky et al 1985	2	4	0	-	0	0	3	3	Cp	23	2	Cp	Cp	Cp	Cp	100	thylakoid-integral	plastid	plastid
	Solyc03g005780	CAB3C LHCB3C	Chlorophyll a/b binding protein 3C; Similar to AtLHCB1.3 (Cab1)	MATSTMALSSSTFAGKAVKLSPSSSEITGNGRVTMRKTATKAKPASSGSPWYGPDRVKYLGPFSGESPSYLTGEFPGDYGWDTAGLSADPETFAKNRELEVIHCRWAMLGALGCVFPELLARNGVKFGEAVWFKAGSQIFSEGGLDYLGNPSLVHAQSILAIWACQVVLMGAVEGYRIAGGPLGEVVDPLYPGGSFDPLGLADDPEAFAELKVKEIKNGRLAMFSMFGFFVQAIVTGKGPLENLANADHLADPVNNNAWAFATNFVPGK	At1g29930	NP_001316912.1 Pichersky et al 1985	2	5	1	0.931	0.00600357	5	0	5	Cp	23	2	Cp	Cp	Cp	Cp	100	thylakoid-integral	plastid	plastid
	Solyc06g063370	CAB9 LHCB9	Chlorophyll a/b binding proteinSimilar to AtLHCB5	MAAATSLYVSEMLGSPVKFSGVARPAAPSPSSSATFKTVALFKKKAAAAPAKAKAAAVSPADDELAKWYGPDrRNAIFLPEGLLDRSEIPEYLNGEVPGDYGYDPFGLSKKPEDFAKYQAYELIHARWAMLGAAGFIIPEAFNKFGANCGPEAVWFKTGALLLDGNTLNYFGKNIPINLILAVVAEVVLVGGAEYYRIINGLDLEDKLHPGGPFDPLGLAKDPDQAAILKVKEIKNGRLAMFSMLGFFIQAYVTGQGPVENLAAHLSDPFGNNLLTVignaGASERVPTL	At4g10340	NP_001317571.1 Pichersky et al 1991	6	23	6	2.415	0.0155732	5	3	8	Cp	54	3	Cp	Cp	Cp	Cp	100	thylakoid-integral	plastid	-
	Solyc01g100650	SOQ1	Suppressor of quenching 1	MALRLTPFLLPTYGKPKLAALFNSRSELSIQFLSKNFRMLDFESRKMGLKVSASQKLEEKNVPESGSQWGKVSAVLFDMDGVLCNSEESSRKAAVDVFAEMGVQVTVEDFVPFMGMGEANFLGGVAAAKGVEGFDTEAAKKRFFEIYLSKYAKPNSGIGFPGAFELVSQCKSSGLKVAVASSADRIKVDANLAAAGLPITMFDAIVSADAFKNLKPAPDIFLAASRILDVPTSECIVIEDALAGVQAAKAAKMRCIAVTTTLSEDTLNAAEPSLIRKEISDISLEDILNGGSGSHNVMVQESQSINDLALSFPEPNMTGSITELDNYVTSGAISSMGGVQVTRRNVVRYGSLGIAASCLLFTITNWKAMQYASPKAIWNLLFGTGNPPFEQKEDASSSQ…	At1g56500	XP_004230317.1	14	68	14	1.276	0.00822831	5	3	8	M	93	3	Cp	possibly M	Cp	ER	87.8	thylakoid-peripheral-stromal-side	plastid	plastid
PSII	544163593	PSBA	Photosystem II protein D1 (chloroplast)	MTAILErRNAESESLWGRFCNWITSTENRLYIGWFGVLMIPTLLTATSVFIIAFIAAPPVDIDGIREPVSGSLLYGNNIISGAIIPTSAAIGLHFYPIWEAASVDEWLYNGGPYELIVLHFLLGVACYMGREWELSFRLGMRPWIAVAYSAPVAAATAVFLIYPIGQGSFSDGMPLGISGTFNFMIVFQAEHNILMHPFHMLGVAGVFGGSLFSAMHGSLVTSSLIRETTENESANEGYRFGQEEETYNIVAAHGYFGRLIFQYASFNNSRSLHFFLAAWPVVGIWFTALGISTMAFNLNGFNFNQSVVDSQGRVINTWADIINRANLGMEVMHERNAHNFPLDLAAIEAPSTNG	Atcg00020	YP_008563068.1	2	3	2	0.668	0.00430761	2	2	4	-	-	-	-	-	-	-	-	thylakoid-integral	plastid	-
	544163638	PSBB	Photosystem II CP47 chlorophyll apoprotein (chloroplast)	MGLPWYRVHTVVLNDPGRLLSVHIMHTALVAGWAGSMALYELAVFDPSDPVLDPMWRQGMFVIPFMTRLGITNSWGGWSITGGTVTNPGIWSYEGVAGAHIVFSGLCFLAAIWHWVYWDLEIFCDERTGKPSLDLPKIFGIHLFLSGVACFGFGAFHVTGLYGPGIWVSDPYGLTGKVQPVNPAWGVEGFDPFVPGGIASHHIAAGTLGILAGLFHLSVRPPQRLYKGLRMGNIETVLSSSIAAVFFAAFVVAGTMWYGSATTPIELFGPTRYQWDQGYFQQEIYrRNAVSAGLAENQSLSEAWSKIPEKLAFYDYIGNNPAKGGLFRAGSMDNGDGIAVGWLGHPIFRDKEGRELFVrRNAMPTFFETFPVVLVDGDGIVRADVPFrRNAAESKYSVE…	Atcg00680	YP_008563114.1	2	3	2	0.52	0.00335323	2	1	3	-	-	-	-	-	-	-	-	thylakoid-integral	plastid	-
	544163609	PSBC	Photosystem II CP43 chlorophyll apoprotein (chloroplast)	MKTLYSLrRNAFYHVETLFNGTLALAGRDQETTGFAWWAGNARLINLSGKLLGAHVAHAGLIVFWAGAMNLFEVAHFVPEKPMYEQGLILLPHLATLGWGVGPGGEVIDTFPYFVSGVLHLISSAVLGFGGIYHALLGPETLEESFPFFGYVWKDRNKMTTILGIHLILLGIGAFLLVFKALYFGGVYDTWAPGGGDVRKITNLTLSPSIIFGYLLKSPFGGEGWIVSVDDLEDIIGGHVWLGSICILGGIWHILTKPFAWArRNAALVWSGEAYLSYSLGALAVFGFIACCFVWFNNTAYPSEFYGPTGPEASQAQAFTFLVRDQRLGANVGSAQGPTGLGKYLMRSPTGEVIFGGETMRFWDLRAPWLEPLRGPNGLDLSRLKKDIQPWQErRNASA…	Atcg00280	YP_008563084.1	1	1	1	0.212	0.00136709	1	1	2	-	-	-	-	-	-	-	-	thylakoid-integral	plastid	-
	544163608	PSBD2	Photosystem II protein D2 (chloroplast)	MTIAIGKFTKDENDLFDIMDDWLrRNADRFVFVGWSGLLLFPCAYFAVGGWFTGTTFVTSWYTHGLASSYLEGCNFLTAAVSTPANSLAHSLLLLWGPEAQGDFTRWCQLGGLWTFVALHGAFGLIGFMLRQFELARSVQLRPYNAIAFSGPIAVFVSVFLIYPLGQSGWFFAPSFGVAAIFRFILFFQGFHNWTLNPFHMMGVAGVLGAALLCAIHGATVENTLFEDGDGANTFRAFNPTQAEETYSMVTANRFWSQIFGVAFSNKRWLHFFMLFVPVTGLWMSALGVVGLALNLRAYDFVSQEIRAAEDPEFETFYTKNILLNEGIRAWMAAQDQPHENLIFPEEVLPRGNAL	Atcg00270	YP_008563083.1	1	1	0	-	0	0	1	1	-	-	-	-	-	-	-	-	thylakoid-integral	plastid	-
	544163630	PSBE	Photosystem II cytochrome b559 alpha subunit (chloroplast)	MSGSTGERSFADIITSIRYWVIHSITIPSLFIAGWLFVSTGLAYDVFGSPRPNEYFTESRQGIPLITGRFDPLEQLDEFSRSF	Atcg00580	YP_008563105.1	1	1	1	<0.038	0	1	0	1	-	-	-	-	-	-	-	-	thylakoid-integral	plastid	-
	Solyc07g066310	PSBR	Photosystem II 10-kDa polypeptide, PsbR	MASTVMSSLSLKPTFTLEKISVKGLPSLTRSSSSFKVVASGVKKLKTDKPYGINGSMALRDGVDASGRKPKGKGVYQYVDKYGANVDGYSPIYNTDEWSPSGDVYVGGTTGLAIWAVTLLGILAGGALLVYNTSALAQ	At1g79040	NP_001234042.1	2	4	2	1.154	0.00744159	3	2	5	Cp	38	2	Cp	Cp	Cp	Cp	100	thylakoid-integral	plastid	plastid
	Solyc06g060340	PSBS	Photosystem II subunit S	MAQTMLLTANAKVDLRSKESLVERLKPKPLSSLFLPSLPLRFSSSSTNASSSKFTSTTVALFKSKAKAPPKKVAPPKEKQKVEDGIFGTSGGIGFTKQNELFVGRVAMIGFAASLLGEAITGKGILAQLNLETGIPIYEAEPLLLFFILFNLLGAIGALGDRGKFVDDPTPPTGLEKAVIPPGKSFKSALGLSEGGPLFGFTKANELFVGRLAQLGIAFSIIGEIITGKGALAQLNFETGVPINEIEPLLLFNIAFFFFAAINPGTGKFITDEEED	At1g44575	NP_001296186.1 Walbraun et al 1994	2	3	2	0.389	0.00250847	3	1	4	Cp	44	2	Cp	Cp	not Cp	Cp	100	thylakoid-integral	plastid	plastid
	Solyc11g042640	PSB33	Rieske (2Fe-2S) iron-sulphur domain protein	MGTLSPKLATGILHFPSHRHHRKLPSLLPVNFNSSTGNNFGCIRCSNVKVKTVKCKATDVSVAEGSSAANWVPVVPLSALPKGERRVIIQDGETILLLWYKDDVFAIENRSPAEGAYSEGLLNAKLTQDGCIVCPTTDSTFYLQNGAIKEWYPNNPVLRVLTPALRNLFVYPVKTDDENIYISTRGGKVDASAEIVFSGKAQPGVTATDVNVDEVRMVIDEGQEAFGFTRRNELINGKAAVignaFLLLLDFELLTGKGLLKGTGFLDFIYSVSDAFN	At1g71500	XP_004250718.1	9	30	9	3.642	0.0234855	5	3	8	Cp	44	4	Cp	Cp	Cp	M	92.2	thylakoid	plastid	-
Oxygen-evolving enhancers	Solyc02g065400	PSBO-1 OEE1-1	Oxygen-evolving enhancer protein 1 of photosystem II PsbO	MAASLQAAATLMQPTKVGVRNNLQLRSAQSVSKAFGVEQGSGRLTCSLQTEIKELAQKCTDAAKIAGFALATSALVVSGANAEGVPKRLTYDEIQSKTYMEVKGTGTANQCPTIEGGVGSFAFKPGKYTAKKFCLEPTSFTVKAEGVSKNSAPDFQKTKLMTRLTYTLDEIEGPFEVSPDGTVKFEEKDGIDYAAVTVQLPGGERVPFLFTIKQLVASGKPESFSGEFLVPSYRGSSFLDPKGRGGSTGYDNAVALPAGGRGDEEELQKENVKNTASLTGKITLSVTQSKPETGEVignaVFESIQPSDTDLGAKVPKDVKIQGIWYAQLE	At3g50820	NP_001296294.1	15	300	3	15.681	0.101119	5	3	8	Cp	27	4	Cp	Cp	Cp	Cp	100	thylakoid-peripheral-lumenal-side	plastid	plastid
	Solyc02g090030	PSBO-2 OEE1-2	Oxygen-evolving enhancer protein 1 of photosystem II PsbO	MAASLQAAATLMQPTKVGGVSARNNLPLRSAQSLSKAFGLEPSASKLSCSLQADLKDFAQKCTDAAKIAGFALATSALVVSGANAEGVPKRLTFDEIQSKTYMEVKGTGTANQCPTIDGGVDSFSFKPGKYNAKKFCLEPTSFTVKAEGVSKNSAPDFQKTKLMTRLTYTLDEIEGPFEVSPDGTVKFEEKDGIDYAAVTVQLPGGERVPFLFTIKQLVASGKPESFSGDFLVPSYRGSSFLDPKGRGGSTGYDNAVALPAGGRGDEEELQKENVKNTASLTGKITFTVTKSNPQTGEVignaVFESIQPSDTDLGAKTPKDVKIQGIWYAQLES	At3g50820	NP_001308345.1	15	309	3	13.125	0.0846368	5	3	8	Cp	43	3	Cp	Cp	Cp	Cp	100	thylakoid-peripheral-lumenal-side	plastid	plastid
	Solyc07g044860	PSBP OEE2	Oxygen-evolving enhancer protein 2, chloroplastic PsbP	MAASTQCFLHQYHALRSSPARTSSVSSPKPNQLICRAQKQDDASNAAVSrRNALALTLLIGTAAIGSKVSPADAAYGEAANVFGKPKENTDFLPYNGDGFKLQVPAKWNPSKEVEYPGQVLRYEDNFDSTSNLIVAVTPTDKKSITDYGSPEEFLSKVDYLLGKQAYFGKTDSEGGFESGAVATANLLEASSATVGGKEYYYLSVLTRTADGDEGGKHQLITATVNDGKLYICKAQAGDKRWFKGAKKFVENAATSFSIA	At1g06680	NP_001234109.2	13	484	13	35.517	0.229032	5	3	8	Cp	36	3	Cp	Cp	Cp	Cp	100	thylakoid-peripheral-lumenal-side	plastid	plastid
	Solyc02g079950	PSBQ OEE3	Oxygen-evolving enhancer protein 3; PsbQ	MAHAMASMGGLIGSSQTVLDGSLQLSGSARLSTVSTNRIALSRPGLTVRAQQGSVDIETSrRNAAMIGLVAAGLAGSVAKAAFAEARSIKVGPPPPPSGGLPGTLNSDEARDFSLPLKNRFYLQPLTPAEAAQRVKDSAKEIVSVKDFIDKKAWPYVQNDLRLRAEYLRYDLKTVISAMPKEQKGKLQDLSGKLFKTISDLNADHAAKTKNSAEAQKYYAETVTTLNDVLANLG	At4g05180	NP_001234528.1	18	199	18	99	0.638403	5	3	8	Cp	49	2	Cp	Cp	Cp	Cp	100	thylakoid-peripheral-lumenal-side	plastid	plastid
Assembly, stability, repair, and other functions	Solyc02g086910	CYP38	Peptidyl-prolyl cis-trans isomerase cyclophilin-type (AHRD V1 ***- A8IRU6_CHLRE); contains Interpro domain(s) IPR002130 Peptidyl-prolyl cis-trans isomerase, cyclophilin-type	MAASVSCHYFSSPLTTSTKSIKPKLNYSHFAPALSKGSIRHFVPLCSSQRSLPSESECQDKEKDWFLSLKKCAAAVALSVSLISGLPGSQWLGPAHASTPALPDVSVLISGPPIKDPGALLRYALPIDNKAIREVQKPLEDITDSLKIAGVKALDSVERNTRQASRALKEGKTLIISGVAKSKTNADHAIELLNKLEAGLGELQQIVEDRTRDAVAPKQKELLNYVGGVEEDMVDGFPYEVPEEYQNMPLLKgranaTVDMKVKVKDNPNLEECVFRIVLDGYNAPVTAGNFIDLVERHFYDGMDIQRADGFVVQTGDPEGPAEGFIDPSTEKTRTVPLEIMVVGEKAPFYGETLEDLGLYKAQTRLPFNAFGTMAMAREEFENNSASSQVFWLLKESE…	At3g01480	XP_004232290.1	13	194	13	19.691	0.126978	5	3	8	Cp	45	3	Cp	Cp	Cp	Cp	98.9	thylakoid-peripheral-lumenal-side	plastid	plastid
	Solyc08g076480	FBN2B	Fibrillin 2; Plastid lipid-associated protein 3, chloroplastic (AHRD V1 **-- PAP3_BRACM); contains Interpro domain(s) IPR006843 PAP fibrillin	MSTLYNPLIFTIKNPKGSLKPHTSLPSSVPTFRLRKFQNFSVQSSISSSNEPEKPTSITPDNDKADDKMVEFVDEWGEKSEPEPGPVTKLADSDPPEYDDEWGNGSPGVDVSGEEDEKLLELKRCLVDTVYGTDFGFRASSEIRAEALEFVCQLEAANPSPAPTESPELLDGNWILVFTAFSELLPLLAVGNIPLLKVEKISQDVNTNSSTIENATTLSSPVATLSFSATATFEVRSPSRIQVEFKEGNFKPPEIKSNINLPETVDLFGQKISLSPVQQSLGPLENAVAGIARTISGQPPLKIPIPGGRTKSWLLTTYLDKDMRISRGDGGLFVLVKEGSSLLY	At2g35490	XP_004244405.1 Laizet et al (2006)	8	77	7	9	0.0580367	5	3	8	Cp	47	2	Cp	none	Cp	Cp	99.9	plastoglobules	plastid	plastid
	Solyc10g039270	FKBP20-2	Peptidyl-prolyl cis-trans isomerase (AHRD V1 *-** C6E462_GEOSM); contains Interpro domain(s) IPR001179 Peptidyl-prolyl cis-trans isomerase, FKBP-type	MLLNSSFLLSNISLSYTLSACHTTQSFPRQKSTFQCCLAATLQDKRVRELNVNILHYEDNMKRRSLLFFLITSGISPAFPAFGKTKSKNPYDERRLLEQNKRIQRENNAPEEFPSFIREGFTVKVVTPENYEKRDSGLILRDFSVGEGDCPKDGQQVTFHYIGYNESGRRIDSTYVQGSPAKIRMGTKALVPGFEEGIRDMRPGGKRRIIIPPELGPPVGPSTFFSSKQFEVFDVELLDVQDCKRRTIGFYSDVVCN	At3g60370	NP_001352870.1 Waseem et al (2018)	5	13	5	1.154	0.00744159	5	2	7	Cp	38	5	Cp	possibly M	Cp	Cp	90.3	thylakoid-peripheral-lumenal-side	plastid	plastid
	Solyc10g081240	CGE	Chloroplast Co-chaperone GrpE; Protein grpE (AHRD V1 *-*- B0CAY8_ACAM1); contains Interpro domain(s) IPR000740 GrpE nucleotide exchange factor	MFENLLKEPKTLPAYLLYLLPPFPLYHTMATTNLTTPATTLRSPSTTVSATAYSSVKPNCITFLSYSRCGRRQTPLLPRRCRIHHSANSIVPLQHRSVEKFVIFASNEDVAEAAETETETEQVEESEQEGSLDGAASEEASDEDDNAAAEETLSVVAASLQLYRDALATNDDSKVAEIEISLKSIEDEKIELQTKVASLTKELSSERDRVLRISADFDNFRKRTDRERASLVTNAQGEVVEKLLSVMDNFERAKTQIKVATEGEEKINNSYQSISKQFMEILGSLGVEPVETVGKPFDPLLHEAIMREDSSEFKEGVVIEEYRKGFRLGDRLLRPSMVKVSAGPGPAKPETTEPKEKEQIETDEKTAETPGDEGTGEGGN	At5g17710	XP_004249350.1	17	153	17	11.589	0.0747319	5	3	8	-	-	4	Cp	ER	Cp	V	44.4	plastid stroma	plastid	plastid
	Solyc02g014150	HCF136	Photosystem II stability/assembly factor Ycf48-like protein , HCF136	MALAHSIFTPLKPLTTTPRPLLPHNFPPRLPLCRSANINrRNAQLIADTAAAIILPPLLGVGVSLSPLPVAKAEDTPLSEWERVFLPIDPGVVLLDIAFVPDDPNHGFVLGTRQTILETKDGGTTWVPRSIASAEEEDFNYRFNSISFKGKEGWIIGKPAILLHTSDAGENWERIPLSSQLPGDMVYIKATGEQSAEMVTDEGAIYITSNKGYNWKAAIQETVSATLNRTVSSGISGASYYTGTFSTVNRSPDGRYVAVSSRGNFYLTWEPGQAYWQPHNRAVArRNAIQSMGWRADGGLWLLVRGGGLYLSKGTGLTEDFEEVSVQSRGFGILDVGYRSQDEAWAAGGSGILLKTTNGGKTWIRDKAADNIAANLYSIYQ	At5g23120	XP_004231481.1	12	223	12	12.111	0.078098	5	3	8	Cp	34	2	Cp	none	Cp	Cp	94.7	thylakoid-peripheral-lumenal-side	plastid	plastid
	Solyc08g016080	HCF173	NAD-dependent epimerase/dehydratase (AHRD V1 *--- B3ECK3_CHLL2); contains Interpro domain(s) IPR016040 NAD(P)-binding domain	MSAATATFTPHVAFSNNNPIWRKPRSCTTNCKYSTASFVTRATSSSNSEIDNEKKNKRKKKKVVIDNKEQKVQETVEEKEQEQVQELQSSSVSVIKRLDDVNPVGLGRRSRQVFDEVWRKFSGLGQISRTIRSDDESTLLIREGGPMCEFAIPGAQNTTVLVVGATSRVGRIVVRKLMLRGYTVKALVRKAEPEVVDMLPRSVELVTGDVGDPSSLKNAVQGCNKIIYCATARSSITGDLIRVNADHQGVYNLTKALQDYNNKLAQQRAGKSSKSKLLIAKFKSEDSLNGWEVRQGTYFQDVVVSKYDGGMDAKFEFTEIGDAVFSGYVFTRGGYVDLSRKLSLPLGYTLDRYEGLVFSVGGNGRSYVVILEAGPSADTTQSKLYFSRISTKAGFCRVR…	At1g16720	XP_004244793.1	23	121	23	9	0.0580367	5	3	8	Cp	41	1	Cp	Cp	Cp	C	64.9	stroma	plastid	plastid
	Solyc05g014310	HHL1	HHL1-Hypersensitive to highlight	MEVAMSLNPLVRLPLSNSRTHEEFSVLKHSVVSTTNRRIQKRKLLVVEAKGRKGGMAARQYQRMAPPMPKIEDDGNPKFVIFIRMANVYLWYPLNIITGGTTAKIMVAAKDNFLGKYIYKDTLARNLAAVIYNDEKEIKKLAMKQHRVLKSATEFRYGYKLVENNNLRAALSTSDVIELPTPDKLKTVVDKVKDFFGDAKESFGKLTALPESSEEDSPKDNTPAKK	At1g67700	XP_004239174.1	4	12	4	0.668	0.00430761	5	1	6	Cp	32	4	-	possibly Cp	Cp	N	65.6	plastid	plastid	-
	Solyc01g097860	FLAP1	Fluctuating light acclimation protein1	MAAAPFLLESNLKWNPLFYTPNPIQCTRLIHYQKLTPSKFSKTSKLTVKCFSKNHKNVCFNDGNGLEVKNKENPFEIVVKSVMKALKALQKPAVAAVLVGLLLMAVCLLLLEKLVCSSYRSLQKDLNRIAEVADTSTPEGLSFVLTETTLALLRHPGYCISAYSSVDVKRSMEEGENRFNQLSIEERGKFDEETLVNVNNIRRKSSTSQRATGFSNEYIVVTILVAAEGAYKLPTINGSGDLKEALQKIASIPSSRTLAVEILWTPQNENDTLSERQLLEDYPLLRPL	At1g54520	XP_004230121.1	1	1	1	0.179	0.00115428	1	1	2	-	-	5	-	Cp	Cp	PM	94.3	plastid	plastid	plastid
	Solyc08g007180	LH-like3a	Light harvesting-like protein 3 (AHRD V1 **-- A9P991_POPTR)	MSMALFSSPPLHFPSLSPPKPHLTHKPFLPLPLKKPFFISPKSIDDASSSAAVSIEQEKDEGSNGVLLNSNGSSPAVVAGAPVTETEEVRKFQDARWVGGTWDLKKFEKDGKVHWDSVIDAEVRRRKWLEDNPESSSNEDPVLFDTSIIPWWAWMKRFHLPEAERLNGRAAMIGFFMAYFVDSLTDIGLVDQMGNFFCKTLLFVAVAGVLLIRKNEDLETIKKLLEETTFYDKQWQASWKDETSSSSKDS	At4g17600	XP_004244555.1	2	2	1	0.585	0.00377238	1	0	1	Cp	48	2	Cp	Cp	Cp	Cp	86.8	thylakoid-integral	plastid	plastid
	Solyc08g077880	LH-like3b	Light harvesting-like protein 3 (AHRD V1 **-- B9N2V9_POPTR); based on At- encodes a light-harvesting-like protein that is involved in chlorophyll and tocopherol biosynthesis anchoring geranylgeranyl reductase in the thylakoid membrane.	MSMALFSSPPLHFPTLTPSKHHLTPKPYPSISFKKPHLSFLVSPKATDNGSGGVVSSSSVTVEQEVLEEKAQDGAVEVEESNEASVGSNGSPPVASAGAPAPEIVRMFQDPRWVGGTWDLKQFQKDGETHWDSVIDAEVRRRKWLEDNPESSSNEEPVLFDTSIIPWWAWMKRFHLPEAELLNGRAAMVGFFMAYFVDSLTGVGLVDQMGNFFCKTLLFVAVAGVLLIRKNEDIETLKKLVDESTFYDKQWKASWQDENSSSSKDS	At5g47110	XP_004245825.1	3	6	2	0.995	0.00641628	5	2	7	Cp	56	2	Cp	Cp	Cp	Cp	97	thylakoid-integral	plastid	plastid
	Solyc06g068480	LPA3	Low PSII accumulation 3, LPA3	MAMAITTALQLQSLPSSFPLLRSPFISFSFSLSLICPRFHSPKTSVKSSVLPLKGIQCIKNEVGADPKKGVSVYKPKSYQVLVSDAADSLFYALNDGKTRLEIDFPPLPTSISSYKGSSDEFSDANIQLVLAVVKKLQEKMETRACVVFPDKPEKRRASDLFKAALDSIDDITIGSLDDIPGGAVTSFFRSVRNTLDFDFEDENEGRWKSDQPPTLYIFINCSTRDLSYIEKYVGKFATSTPSLLFNLELDTLRADLGIIGFPPRELHYQFLSQFTPVFYIRTREYSKTVAVEPYIVNYNGALFRQYPGPWQVMLKQTDGSFVCVAESATRFTLNETKEELLRVLGLQEEKGSSLEFLRRGYKTATWWEEDIDLEASSAWRS	At1g73060	XP_004241678.1	10	36	10	3.281	0.0211576	5	3	8	Cp	43	2	Cp	Cp	Cp	Cp	58.1	thylakoid-peripheral-stromal-side	plastid	plastid
	Solyc08g075990	-	Low PSII accumulation-like, chloroplastic (NCBI, TAIR)	MWLSTFPTALTAAVSVPSSHTPQDFSWRKFKLKRNVKISRNFEFAISCSGDKAASIGFDVSFPKDYTELLQQAKEATELALKDNRQLMEIEFPTAGLGSVPGDGEGGIEMTGSIQLIREFCDLLVIPEKATKTRIFFPEANEVKFARQSIFGGASFKLDYLTKPSFFEDFGFTEKVKMADRVKPEDELFVVAYPYFNVNEMLVVEELYKAAVSNTSRKLIIFNGELDRIRSGYYPPFFYPKLAALSKTLFPEMETVYYIHNFKGRYGGVLFRCYPGPWKVFRRVGSSYICLHQQESMPSLKEVALDILPSA	At5g48790	XP_004245955.1	5	18	5	1.276	0.00822831	5	3	8	Cp	47	4	Cp	Cp	Cp	Cp	72.7	thylakoid	plastid	-
	Solyc01g005520	MET1	Met1, chloroplastic; Tetratricopeptide TPR_2 repeat protein (AHRD V1 *--- A8ZVN6_DESOH); contains Interpro domain(s) IPR001478 PDZ/NADHR/GLGF	MASTISYTSLCSLLKLNQTNQKTPFSPSLSSPSSPSSLVKIKNQLCFSSNFCSHLNKASIFMVKASETEATQSEKEEEDKYEEYEVEIIQPYGLKFTKGRDGGTYIDAIAPGGFADKTGKFAVGDKVIATSAVFGEEIWPAAEYGRTMYTIRQRIGPLLMKMQKRYGKVEEVGELTEKEIIRAERNAGFISDRVREIQVTNARRKKEQKEQRERELREGLKLSKNGKYEEALEKFESVLGSRPTGDELAVASYNVACCYSKLNQLQAGLSALKDAMEAGFEDFKRIRTDPDLANLRTSEDFETLMKKFDESFINENAINAIKSLFGFNKK	At1g55480	XP_004228646.1	17	79	17	16.302	0.105124	5	3	8	Cp	64	1	Cp	Cp	Cp	C	86.4	thylakoid-peripheral-stromal-side	plastid	plastid
	Solyc01g096660	MPH1	PSII-associated proline-rich protein (NCBI); MAINTENANCE OF PSII UNDER HIGH LIGHT 1, MPH1 (At5g07020)	MACAALSANSCTIASSSTGRLSFSTYQKDSKLRQRHSLVRFRVRASTDDSDCNAEECAPDKEVGKVSMEWVAMDNTKVVGTFPPRKPRGWTGYVEKDTAGQTNIYSVEPAVYVAESAISSGTAGTSSDGAENTKAISAGIALISVAAASSILLQVGKNSPPPIQTVEYRGPSLSYYINKLKPAEIVQASITEAPTAPETEEVAITPEVESSAPEAPAPQVEVQSEAPQDTSSSSSNIS	At5g07020	NP_001234524.1	4	51	4	4.623	0.0298115	5	3	8	Cp	44	2	Cp	Cp	Cp	Cp	97.5	thylakoid	plastid	plastid
	Solyc09g011010	OHP1	One helix protein 1	MASLSSSFLSTTLSPNYSQNHHLFLPNNPNLKITKRTSFNIQAAKVPPGVELPKEVPKLSKPLLGFTNTAEIWNSRACMIGLIGTFIVELIFNKGILEMIGVEIGKGLDIPL	At5g02120	XP_004246456.1	1	2	1	0.585	0.00377238	2	0	2	Cp	42	3	Cp	Cp	Cp	Cp	100	thylakoid-integral	plastid	plastid
	Solyc04g071930	OHP2	One helix protein 2	MSVASSSSFPCIKIQNPSSSSLSSYNFRFSTTLTIRSSQADGPLrRNAPMVQPPTPLKPTPPSPPSTSSPPPPSPPSAPLKQVAVEGKNVITMEFQRQKAKELQEYFKQKKLEQANQGPFFGFIGKNEISNGRWAMFGFAVGMLTEYATGSDFVDQVKILLSNFGILDLE	At1g34000	XP_004237827.1	3	12	2	0.995	0.00641628	5	1	6	Cp	79	1	Cp	Cp	Cp	Cp	99.5	thylakoid-integral	plastid	plastid
	Solyc06g007350	PP2C26 PBCP	PSII Core phosphatase; PP2C_26 (NCBI); Phosphatase PTC7 homolog (AHRD V1 **** C1BT38_9MAXI); contains Interpro domain(s) IPR001932 Protein phosphatase 2C-related	MAISILRPSISLPQHFLNSMNPQKFSSISVIRKKQSFLHCVASDSAPSPARQEMSLSVGMYLIPHPNKVEKGGEDAFFVSSDNGGVIVVADGVSGWAEKNVDPALFSRELVANVSSLVGNVEVNDDPRILIKGAHAATSSIGSATVIVSVFENGILKIASVGDCGLRVIRKGQMIFSTFPLEHYFDCPYQLSSEAVSQTYLDAIVSTVNLQVGDTIIMGSDGLFDNIFDQEIVSVVTTNDDVSNAAKALADLARNHSVDTKFDSPFSLEARARGFDVPWWKKVFGMKLTGGKLDDITVIVGKVKNT	At2g30170	XP_004240420.1	1	3	1	0.259	0.00167017	3	1	4	Cp	41	2	Cp	Cp	Cp	Cp	44.2	plastid stroma	plastid	-
	Solyc03g082960	PPH1 TAP38 PP2C57	Protein phosphatase 1-like; PP2C_54 (NCBI); Serine/threonine phosphatase family protein (AHRD V1 **** C1E0J1_9CHLO); contains Interpro domain(s) IPR015655 Protein phosphatase 2C	MALSSPHLQKVLLNKICSYKITSKKSIIQKPLGGGGGGGGEGRGRCSSAIAIDAPAPFTSVSGIRWGSTMVQGPREEMEDDAVIVQSDDLDGFTYAAVFDGHAGFSSVKFLREELYKECVLALQGGPLLNRKDLNAIRKALQEAFENADRELLNRLESSEKEDESGATATALFVGNDTLIIAHVGDSSVVLSRSGKTEILTNSHRPYGNNKVSLQEIRRINEAGGWIVNGRICNDISVSRAFGDMRFKTKKKEMLEKGVKERRWSEKFISRIQFRGDLVIASPDVLQVNLGSDAEFVLLASDGLWDYMKSDEIVDFVRNQLREHGDVQIACEALARLALDRRTQDNVSIVIADLGRTDWRNLPVKKQNVVLELGQALVTISFVSIGIWLSTMISP	At4g27800	XP_004234983.1	3	7	3	0.778	0.00501695	4	3	7	Cp	61	5	-	possibly Cp	not Cp	M	99.9	thylakoid-peripheral-stromal-side	plastid	-
	Solyc03g114930	PPL1	PsbP-like protein 1	MVLVQNYITPCQAYLPNASSSQVDVMHQLGWFRSGHNrRNAAPGCVIRSENVTETSTSSCQDRLGrRNAQFLAVGPTIVPLLLMTSQIPTSFAAGNKKGFLPVTDKKDGYSFLYPFGWQEVVVEGEDKVFKDVIEPLESASVNLVPSSKEDIRDFGSPQQVAETLIKKFLASPSQKTKLIESSERVVDGKTYYTFEFVAQAPNYTRHALTVVCIGNGKFYTLTTGANErRNAWGKMKDRLQTVVDSFQIFNV	At3g55330	NP_001334266.1	7	49	7	5.579	0.0359763	5	3	8	Cp	46	4	Cp	Cp	Cp	Cp	100	thylakoid-peripheral-lumenal-side	plastid	plastid
	Solyc07g054290	PSB27-H1	Photosystem II D1 precursor processing protein PSB27-H1, chloroplastic	MIRHVALIPLITKTTTLSFSPNLFKKHKSMASPTLITPSTSTPKSLITPIRSKLITSVTTTTITLRRREFLSLSAGILSPSLLLPATSAFAATDEEYVKEASEVIQKVRSTLNMDKGDPNIADSVAELREASNYWVAKYRREKALLGRASFRDIYSALNAVSGHYVSFGPTTPIPAKRKVRILEEMDTAEKALKRGR	At1g03600	XP_004243333.3	3	9	3	1.512	0.00975016	5	3	8	Cp	88	2	Cp	M	Cp	Cp	96.5	thylakoid-peripheral-lumenal-side	plastid	plastid
	Solyc09g076030	PSB27-H2	Photosystem II D1 precursor processing protein PSB27-H2, chloroplastic	MPFFIPMNVSPFAISCSSQKIQGTDEYKLQSRSSGILSSKEEGTRRQLLAVGFASPLVSLLTYSCSLKVLPAWAEDQEIQDKDESVVGAIKSLFDPNETTKSGKVLPKAYLNSVREVVKTLRESLKEDPNDMSKFRRTADAAKESIREYLGGWRGQKSVVNEESYVLLEKAIRSLASFYSKAGPSAALPEEVKSEILDDLNKAEEAL	At1g05385	XP_004247356.1	8	37	8	4.878	0.0314559	5	3	8	Cp	37	3	Cp	Cp	Cp	C	38	thylakoid-peripheral-lumenal-side	plastid	-
	Solyc09g064500	PSB28	Photosystem II reaction center Psb28 protein	MATLQSLAFSPALSHTTHQPRSLLGIASRIVHQSSGSSFNGQRLCLSRSRFATDIQNKKMSRLCIVMVQPKIQFIQGTDEQTIPDVKLTKSRDGTNGMAIFRFDQPSVFDSSGEVGDITGFYMIDEEGVLTSVDVNAKFVNGKPAGIEAKYIMRTPRDWDRFMRFMERYANSNGLQFVKS	At4g28660	XP_004247130.1	4	21	4	3.217	0.0207449	4	2	6	Cp	64	2	Cp	Cp	Cp	Cp	100	thylakoid-peripheral-lumenal-side	plastid	plastid
	Solyc11g042640	PSB33	Rieske (2Fe-2S) domain protein (AHRD V1 *-*- C7QP67_CYAP0); contains Interpro domain(s) IPR017941 Rieske [2Fe-2S] iron-sulphur domain	MGTLSPKLATGILHFPSHRHHRKLPSLLPVNFNSSTGNNFGCIRCSNVKVKTVKCKATDVSVAEGSSAANWVPVVPLSALPKGERRVIIQDGETILLLWYKDDVFAIENRSPAEGAYSEGLLNAKLTQDGCIVCPTTDSTFYLQNGAIKEWYPNNPVLRVLTPALRNLFVYPVKTDDENIYISTRGGKVDASAEIVFSGKAQPGVTATDVNVDEVRMVIDEGQEAFGFTRRNELINGKAAVignaFLLLLDFELLTGKGLLKGTGFLDFIYSVSDAFN	At1g71500	XP_004250718.1	9	30	9	3.642	0.0234855	5	3	8	Cp	44	4	Cp	Cp	Cp	M	92.2	thylakoid	plastid	-
	Solyc04g081320	SPA LQY1	Protein SPA, chloroplastic; Arabiopsis homolog is LOW QUANTUM YIELD OF PHOTOSYSTEM II 1, LQY1	MLTAPSLSRFKSPFISSPLKLPTLSSSFFTQKFHQTCRRRNSYPCIKAVDLDQNTVIAITVGVLSVAIGVGIPVFYETQIDNAAKRENTQPCFPCTGTGAQKCRFCMGTGSVTVELGGGETEVSRCINCDGAGGLTCTTCQGSGIQPRYLDRREFKDDD	At1g75690	NP_001307325.1 Bermúdez et al (2014)	1	3	1	-	0	0	3	3	Cp	65	3	Cp	M	Cp	Cp	98.2	plastid	plastid	plastid
	Solyc07g054820	THF1 PSB29	Thylakoid formation1, chloroplastic	MAAVTSVSFSAITQSAERKSSVSSSRSIDTFRFRSNFSFDSVNVRSSNSTSRFVVHCTSSSAADLPTVADTKMKFLTAYKRPIPTVYNTVLQELIVQQHLTRYKKSYQYDPVFALGFVTVYDQLMEGYPSEEDRNAIFKAYVEALKEDPEQYRADAQKLEEWARTQNANTLVDFSSKDGEIENIFKDIAQRAGTKDGFCYSRLFAVGLFRLLELANVTDPTILEKNQKVWTGTLTFIAICCPSWFRLKSC	At2g20890	XP_004243305.1	6	65	6	3.394	0.0218863	5	3	8	Cp	68	1	Cp	Cp	Cp	Cp	97.7	thylakoid-peripheral-stromal-side; envelope-inner-peripheral-stromal-side	plastid	plastid
	Solyc12g009600	TL16.5 MPH2	thylakoid lumenal 16.5 kDa protein, chloroplastic [Solanum lycopersicum]; Thylakoid lumenal protein (AHRD V1 ***- B6SU36_MAIZE)	MATVCLSNPKSFLPSSSFSTRKQIILCKAENNVCNFSSIISKRSLSISLASSLLLSLTGNGTFNANAAILEADEDDELMEKVKKDRKKRLERQGIVNSSSKEKGYLQDLVYKLSKVGQAIEKNDLSAASSVLGQNTDADWLQKVNSALNKFSGSDEEKSEIDSFNSSLSSLVSSVTKNDIEGSKTAFVASASAFEKWTTLTGLIEELKGL	At4g02530	XP_004251724.1	11	85	11	10.938	0.0705339	5	3	8	Cp	26	2	Cp	Cp	Cp	N	44.8	thylakoid-peripheral-lumenal-side	plastid	plastid
	Solyc01g098640	TLP18.3	Thylakoid lumen 18.3	METILSPPFSPLFNPKTSLSKPFLSLPHLPRSTKSICCSLRKQYSQTEKQSFSVPKSWVSHVQQGLAAIAISLALNFCPVVSSDSALASEFDVLNEGPPKDSYVVDDAGVLSRVTKSDLKALLSDVEKRKGFHINFITVRKLTSKADAFEYADQVLEKWYPSVEQGNDKGIVVLVTSQKEGAITGGPDFVKAVGDTVLDATVSENLPVLATEEKYNEAVFSTARRLVAAIDGLPDPGGPQLKDNKRESNFKSREETDEKRGQFTLVVGGLLVIAFVVPMAQYYAYVSKK	At1g54780	XP_004230168.1	10	34	10	5.31	0.0342416	5	3	8	Cp	37	1	Cp	Cp	Cp	Cp	99.7	thylakoid-peripheral-lumenal-side	plastid	plastid
	Solyc02g083270	VKOR LTO1	Thiol-disulfide oxidoreductase LTO1; Vitamin K epoxide reductase (AHRD V1 **-- B4AXQ4_9CHRO); contains Interpro domain(s) IPR012932	MASIIGVSSSPFPTQTSHLLPSRSNSISSLVQLKRDSVRRLLLLRVNCSSRQVGDAETESESKVVLPDTPADTGISAYNWCAALGGIGFLETSYLTFLKLTNSAAFCPVGDGASCGDILNSSYSAVFGVPLPLIGMVAYGVVAILGIQLGQKSRPLGTGEANGRLVLLGTTTSMAAASAYFLYILSTKFTGEFCPYCLASVLLSFSLFISSMKGLGFQEVQKDVGIQLLIVLLVVSTLNNSYSDSQPTNTGSALAEMEYFTAEITSESTPFAISLAKHLHSIGAKMYGAFWCSHCQEQKQMFGREAAKLLDYVECFPYGLKRGISMINACQEAKLEGFPTWVINGEVLSGEKKLSELAALSGFDMKEELTEAK	At4g35760	NM_001311344.1	3	5	3	1.154	0.00744159	2	0	2	Cp	47	1	Cp	Cp	Cp	Cp	99.9	thylakoid-integral	plastid	-
	Solyc01g112060	YCF9 HCF244	Ycf39; similar to AtHCF244	MASTLYGHLATPTLPSRKLSSLSCPTMFHSALSFSIATTKAKHGSAPKVVCNAQSAPAALNLAPGTPVRPTSILVVGATGTLGRQVVRRALDEGYDVRCLVRPRPAPADFLRDWGATVVNADLSKPETIPATLVGVHTVIDCATGRPEEPIKTVDWEGKVALIQCAKAMGIQKFIFFSIHNCDKHPEVPLMEIKHCTEKFLRDSGLNHVVIRLCGFMQGLIGQYAVPILEEKSVWGTDAPTRIAYMDTQDIARLTFIALRNENINGKLLTFAGPRAWTTQEVITLCERLAGQDANVTTVPVSVLRFTRQLTRLFEWTNDVADRLAFSEVLTSDTVFSVPMAETYNLLGVDAKDVSSLEKYLQDYFTNILKKLKDLKAQSKQTDIFF	At4g35250	XP_004231083.1	9	49	9	1.994	0.0128583	5	3	8	Cp	88	2	Cp	Cp	Cp	Cp	99.5	thylakoid	plastid	plastid
PSII turnover	Solyc02g086830	DEG1	Protease Do-like (S2 serine-type protease) (AHRD V1 **** Q7UQ70_RHOBA); contains Interpro domain(s) IPR001254 Peptidase S1 and S6, chymotrypsin/Hap	MAASSHSLASSACFSTTPARKFSGSDRFQLAKSLLCRKIPGFSGSVVCArRNAICSNYASSGDQSNYGKKLMDSIFVACTSVALSFSLYIADVDPASAFVVTSPRKLQTDELATVRLFQENTPSVVYITNLASRQDMFTLDVFEVPQGSGSGFVWDKNGNIVTNYHVIRGASDLRVTLADQTTYDAKVVGFDQDKDVAVLHIDAPKDKLRPIPIGVSADLLVGQKVFAIGNPFGLNADHTLTTGVISGLrRNAEINSAATGRPIQDVIQTDAAINPGNSGGPLLDSSGNLIGINTAIYSPSGASSGVGFSIPVDTVSGIVDQLVQFGKVTRPILGIKFAPDQSVEQLGVTGVLVLDAPPNGPAGKAGLLPTKRDSYGRLILGDIITSINGKKVSNGTDL…	At3g27925	XP_004232295.1	13	137	13	11.915	0.0768341	5	3	8	Cp	53	2	Cp	Cp	Cp	Cp	99.9	thylakoid-peripheral-lumenal-side	plastid	-
	Solyc06g084480	DEG2	DEG2, Do-like2, Serine protease (AHRD V1 **** D8UJN6_VOLCA); contains Interpro domain(s) IPR015724 Serine endopeptidase Deg2	MAAANSWFSVLTSTGGYLTSHRLFSTSLTSSSFFIPQNQNYKRQVLNKSSSSPPEKVAGKQKFSrRNASKNEGPFANADGRSSTSENGRSQSTAIKSFGLQKKGKGVLLDSKDQQVETGSIQDAAFLNAVVKVYCTHTAPDYSLPWQKQRQFTSTGSAFMIGDGKLLTNAHCVEHDTQVKVKKRGDDTKYVAKVLARGVACDLALLSVESKEFWEAAEPLSFGRLPRLQDAVTVVGYPLGGDTISVTKGVVSRIEVTSYANGSSELLGIQIDAAINPGNSGGPAFNDDGDCIGVAFQVYRSDDAENIGYVIPTTVVSHFLEDYERNGKYCGFPCLGVLLQKLENPALRACLKVPSNEGVLVRKVEPTSDISNVVKEGDVIVSFDGVHVGCEGTVPFRSS…	At2g47940	XP_010323029.1	6	29	5	1.721	0.0110979	5	2	7	Cp	75	2	Cp	Cp	Cp	Cp	98.9	plastid stroma	plastid	-
	Solyc09g074420	DEG2	DEG2, Do-like 2, Serine protease (AHRD V1 **** D8UJN6_VOLCA); contains Interpro domain(s) IPR015724 Serine endopeptidase DegP2	MAAATCCFSAGTGTGNSLSFLTSHRPSTSLRPPSSLFIPKAVHQKSSSPPPHPPSQKAGGKQNFIWRSKDERHLANNDGRSSKNETGRSKSTAFKFSGLQRKGSGKGAPFESKEPQVETGFIEDAPFLNAVVKVFCTHTAPDYSLPWQKQRQFASTGSAFMIGDGKLLTNAHCVEHGTQVKVKrRNAGDDTKYVAKVLARGVECDIALLSVESKDFWKGAEPLCFGHLPHLQDAVTVVGYPLGGDTISVTKGVVSRVEVTSYAHGSSELLGIQIDAAINPGNSGGPAFNDDGECIGVAFQVYRSDDVENIGYVIPAMVVSHFLEDYERNGKYSGFPCLGVLLQKLENPALRACLRVPSNEGVLVRKIEPTSDVSNVVKEGDVIVSFDGVRVGCEGTVPF…	At2g47940	XP_004247469.1	5	24	4	1.239	0.00798971	5	3	8	Cp	92	2	Cp	Cp	Cp	Cp	99.7	plastid stroma	plastid	-
	Solyc08g048550	DEG5	Protease Do-like (S2 serine-type protease) (AHRD V1 **** A6CGY1_9PLAN); contains Interpro domain(s) IPR001254 Peptidase S1 and S6, chymotrypsin/Hap	MVVLGVVCPQPQHIVVSIRTQIPPISTQTQYCTrRNAKALIFTSSMISSFIYTSHHSPATAFQIEMPQQEEDRLVHLFQDTSPSVVFIKDLELAKGSNDSTKVLADDDNAKVEGTGSGFIWDKFGHIVTNYHVITKLATDNIGLQRCKVSLVNTKGESIVKDAKIVGVDPAYDLAVLKVDVEGVEVKPVSVGTSRGLRVGQSCFAIGNPYGFENTLTTGVVSGLGREIPAPNGAAIKGAIQTDAAINAGNSGGPLIDSSGHVignaLNTATFTrRNAGSGMSSGVNFAIPIDTVVRTIPYLIVYGTSYKDRY	At4g18370	XP_004244974.1	4	29	4	2.415	0.0155732	5	3	8	Cp	41	5	Cp	Cp	Cp	Cp	99.4	thylakoid-peripheral-lumenal-side	plastid	plastid
	Solyc02g067360	DEG8	Protease Do-like (S2 serine-type protease) (AHRD V1 **** Q7UQ70_RHOBA); contains Interpro domain(s) IPR001254 Peptidase S1 and S6, chymotrypsin/Hap	MEVIIVSSNAKTPIHLHTNQPQPPILNNSVFLGRRELCFDSISTVCSADPITSNPSTSVSAPRGGGDNGNSLIEQLRRSFPFATRRMLLTSFFMYSCYHPSRYLSALALGDPSVTVEQVTPTIFPSAALFPLEERVVELFEKNTYCVVNIFDVTLRPTLNVTGMVEIPEGNGSGVIWDKEGHIVTNYHVignaNSLSRNPSRGQVVARVNILAADGVQKNFEGILIGADRAKDLAVLKVGASEDLLRPIRVGESSSLRVGQQCLAIGNPFGFNADHTLTVGVISGLNRDIYSQTGVTIGGGIQTDAAINPGNSGGPLLDSKGNLIGINTAIFTQTGTSAGVGFAIPSSTVLRVVPQLIQSGKVLRAGLNIEIAPDLIANQLNVRNGALVLLVPGNSPAA…	At5g39830	XP_004233360.1	9	30	9	3.437	0.0221636	5	3	8	Cp	60	5	Cp	Cp	Cp	C	69.4	thylakoid-peripheral-lumenal-side	plastid	plastid
	Solyc07g055320	FTSH2	ATP-dependent zinc metalloprotease FTSH 2, chloroplastic (NCBI)	MATSSVCIAGNDLSTHRTQKVFRKEIYGRKILYSSNLPSSRKTSRVVVKASLQQGPHEGRRGFLKLLLGNVGLGVPALLGNGKAYADEQGVSNSRMSYSRFLEYLDKDRVQKVDLFENGTIAIVEAVSPELGNRVQRVRVQLPGLSQELLQKFREKNIDFAAHNAQEDSGSLIFNLIGNLAFPLILIGGLFLLSRRSNGGMGGPGGPGNPLAFGQSKAKFQMEPNTGVTFDDVAGVDEAKQDFMEVVEFLKKPERFTAVGARIPKGVLLVGPPGTGKTLLAKAIAGEAGVPFFSISGSEFVEMFVGVGASRVRDLFKKAKENAPCIVFVDEIDAVGRQRGTGIGGGNDEREQTLNQLLTEMDGFEGNTGIIVVAATNRADILDSALLRPGRFDRQVSVD…	At2g30950	XP_004243266.1	16	152	12	7.432	0.0479254	5	3	8	Cp	49	5	Cp	possibly Cp	Cp	C	100	thylakoid-integral	plastid	plastid
	Solyc04g082250	FTSH5	ATP-dependent zinc metalloprotease FTSH, chloroplastic (Fragment) (AHRD V1 ***- FTSH_CAPAN); contains Interpro domain(s) IPR005936 Peptidase M41, FtsH	MANAVLSSNFLGSQIFVSPPTPKTSRYFHLHSrRNAKYIVPQSILSKKSNSDNFKNVPSKAAIAALLFSSITPQAFALDNTTPAAPPQVIEAEAPKPSASNSLPFAQNIILNAPKTQAQPASDLPEGTQWRYSEFLNAVKKGKVERVRFSKDGSTLQLTAVDGrRNAANVIVPNDPDLIDILAMNGVDISVSEGEGGNGLFSVignaNLLFPIIAFAGLFFLFrRNASQGGPGGPGGLGGPMDFGRSKSKFQEVPETGVTFADVAGADQAKLELQEVVDFLKNPDKYTALGAKIPKGCLLVGPPGTGKTLLARAVAGEAGVPFFSCAASEFVELFVGVGASRVRDLFEKAKSKAPCIVFIDEIDAVGRQRGAGLGGGNDEREQTINQLLTEMDGFSGNS…	At5g42270	NP_001234196.2	21	158	20	11.915	0.0768341	5	3	8	Cp	57	2	Cp	Cp	Cp	Cp	92.6	thylakoid-integral	plastid	plastid
Unknown Function	Solyc04g009420	PPD2	PsbP-like protein, Photosystem II oxygen evolving complex protein PsbP (AHRD V1 ***- Q11A16_TRIEI); contains Interpro domain(s) IPR016123 Mog1/PsbP, alpha/beta/alpha sandwich	MSAISSLVCSNIFRNGFFQCLPSISSIITPLQLKTRSRSLVVLSNEDELVPTYSTRRRALNVSILTVLLSIPFSSFAIAIGEVLELERYTDSAEGFTLLKPSSWSKVDKAGATALFQDANKGSNNVGVVVIPVKITTLSQFGTPQFVADKLILAEKRKESTKEAEVVSVSERTGEGGLQVYEFEYKVDSTRGGLKRILSAAFVASGKLYLLNIAHSDGSEGPIDPDRRNTLEQILHSFDIAPST	At2g28605	XP_004236825.1	9	29	9	9	0.0580367	5	3	8	Cp	42	2	Cp	possibly Cp	Cp	Cp	99.7	thylakoid-peripheral-lumenal-side	plastid	plastid
	Solyc12g094720	PPD3	PsbP domain-containing protein 3, chloroplastic (AHRD V1 ***- PPD3_ARATH); contains Interpro domain(s) IPR016123 Mog1/PsbP, alpha/beta/alpha sandwich	MATLSSSSSSSSSSSSPCLNQYQYQAILRLPRVPLISSHLLKVPKKNRNSLIFCCNNTVPDSRTGEQVKGECLTKrRNAELLLQAGSVAFSLSAFTSIALAEKDVPEEFRVYSDDVNKFKIMIPSDWQIGAGEGDGVRSLLAFYPPEASNSNVSIVITSLGADFTKLESFGKVDAFAENLVSGFDRSWQRPPGVKAKLIDSKASKGLYYIEYTLQNPGESLRHLFSVLGIANNGIYNRLYTLTGQFVDEEAEKYGAKIQKAVSSFRLI	At1g76450	XP_004253115.1	7	92	7	9	0.0580367	5	3	8	Cp	54	2	Cp	Cp	Cp	Cp	100	thylakoid-peripheral-lumenal-side	plastid	plastid
	Solyc04g064670	PPD4	psbP domain-containing protein 4, chloroplastic [Solanum lycopersicum]; Thylakoid lumenal 19 kDa protein, chloroplastic (AHRD V1 *-*- TL19_ARATH); contains Interpro domain(s) IPR016123 Mog1/PsbP, alpha/beta/alpha sandwich	MGTFVYSSSCLSWKNLSRQMNPSHHVVPRGVPEKGCSRIKSAVCSKEDARMNRDCEISAGSLNrRNASAIISGASLISSVLLFPGEGSAVIKQGLLAGRVPGLSEPDEEGWRTYrRNAPDDKSGGHGVGWSPMIPYTFSVPDKWEEVPVSIADLGGTEIDLRFANPKEGRVIVIVAPVKRFSDEIGEEATIEQIGPPDKVISAFGPEVignaENVEGKVLRSEVAEHEGRTYYQFELEPPHVMITATAAGNRLYLFNVTGNGLQWKRYYKDLRKIAESFRVV	At1g77090	XP_004237726.1	7	46	7	7.111	0.0458554	5	3	8	Cp	43	3	Cp	Cp	Cp	Cp	100	thylakoid-peripheral-lumenal-side	plastid	plastid
	Solyc08g067840	PPD5	PsbP domain-containing protein 5, chloroplastic (AHRD V1 **-- PPD5_ARATH); contains Interpro domain(s) IPR016123 Mog1/PsbP, alpha/beta/alpha sandwich	MAATALLSSPPLPSSSNHSILSTPLKKQSKILWNQKKCGKFRVCSEFCKEPTSQYGVSrRNADLTFIALSSSLSLIFPFSGFTAEEELKMGSSVDDINAYSYLYPIEIPSKKFAFKWVETRKSERYSSAAPLSPDARLRIVSERVDIIDNLIISVSIGPPNSQFLKSKEKSTWSAKDVADSVLSDKSALRVTSTQRLAESSLLDAHASEIDGESYWYYEYLVRKSPTKAAALEPNLFRHYVASTAERDGYLYTLSASTLGKQWEKMGPSLEKTVASFRLLPPTESYVPPYKDPWRFW	At5g11450	XP_004245232.1	6	23	6	1.894	0.0122135	5	3	8	Cp	52	2	Cp	Cp	Cp	Cp	98.8	thylakoid-peripheral-lumenal-side	plastid	plastid
	Solyc06g065490	PPD6	PsbP domain-containing protein 6, chloroplastic (AHRD V1 ***- PPD6_ARATH); contains Interpro domain(s) IPR016123 Mog1/PsbP, alpha/beta/alpha sandwich	MALKPLSSIFPNSTNPSLTSAKPHHQNMGLSrRNADFINVGLSVMPLLVSPPPLSIAREVEVGSFLPPSPTDPNFVLFKATPKDTPALRAGNVQPYTFILPPTWKQLRIANILSGNYCQPKCAEPWVEVKFENEKQGKVQVVASPLIRLTNKPNATIEDIGTPEKVIASLGPFVTGNTLDPDELLETSIEKRGDLTYYKYVLETPYALTGSHNLAKATAKGNTVVLCVVSANDKQWASSQKTLQAILDSFEV	At3g56650	XP_004241815.1	4	68	4	2.511	0.0161922	5	3	8	Cp	56	2	Cp	Cp	Cp	Cp	100	thylakoid-peripheral-lumenal-side	plastid	plastid
A Proteins were identified by acetone preparations and/or the gel method. For emPAI and Mol% calculations, only the data from the acetone prepartions were used. Proteins identified solely by the gel method have data for the number of peptides, PSMs and unique peptides.
B Names of tomato proteins were based on the literature, NCBI annotation (identified in BlastP searches), and/or SolyGenomics descriptor. In a small number of cases, tomato protein names were assigned based on NCBI annotations and the Arabidopsis homolog.
C Some Sol Genomics descriptors were updated when NCBI annotations and Arabidopsis gene annotations were aligned.
D Target P's subcellular locations are: chloroplast (Cp), mitochondria (M), secretory (S), and no predicted location is indicated by a dash (-).
E ChloroP was used to predict the presence of a chloroplast transit peptide (Y) and the lack of a predicted transit peptide is indicated with a dash (-).
F Predotar's predicted subcellular locations were: chloroplast/plastid (Cp),endoplasmic reticulum (ER) or mitochondrion (M). For proteins with localization predictions that were less clear, Predotar provided categorized of possibly Cp, M and ER. Proteins with unresolved locations or that did not have a homolog detected by Predotar are indicated with a dash (-).
G WoLF PSORT's and YLoc's predicted subcellular locations were: chloroplast/plastid (Cp), cytosol (C), cytoskeleton (Cy), endoplasmic reticulum (ER), extracellular (EX), golgi apparatus (G), mitochondrion (M), nucleus (N), peroxisomes (P), plasma membrance (PM), and vacuole (V). Proteins with no chloroplast location in WoLF PSORT are indicated by not Cp.The number of proteins predicted to be in t…

## Sheet: Table S5C-Cytb6f
Table S5C. Cytochrome b6/f complex proteins detected in the tomato stromal proteome.
Gene and protein descriptors						ProteomicsA					Times detected			Algorithms								Databases
Tomato Gene ID	Gene nameB	DescriptionC	Protein Sequence	Arabidopis homolog	Tomato protein NCBI accession	Peptides	PSMs	Unique Peptides	emPAI	Mol%	Acetone samples	Gel samples	Total	TargetP D ver.1	Transit peptide length	TargetP (reliability class)	ChloroP E	Predotar F	WoLF PSORT G	YLoc H	YLoc % Confidence	PPDB	SUBA4	plprot
544163626	PETA	Cytochrome f (chloroplast)	MQTRNAFSWLKKQITRSISVSLMIYILTRTSISSAYPIFAQQGYENPREATGRIVCANCHLANKPVEIEVPQAVLPDTVFEAVVRIPYDMQLKQVLANGKKGGLNVGAVLILPEGFELAPPDRISPEMKEKIGNLSFQSYRPNKTNILVVGPVPGKKYSEITFPILSPDPATKKDVHFLKYPIYVGGNRGRGQIYPDGNKSNNTVYNATAAGIVSKIIRKEKGGYEITITDASEGRQVVDIIPPGPELLVSEGESIKFDQPLTSNPNVGGFGQGDAEIVLQDPLRVQGLLFFLASVILAQIFLVLKKKQFEKVQLAEMNF	Atcg00540	YP_008563101.1	8	24	4	3.394	0.0218863	5	3	8	-	-	-	-	-	-	-	-	thylakoid-integral	Cp	-
544163642	PETB	Cytochrome b6 (chloroplast)	MSKVYDWFEERLEIQAIADDITSKYVPPHVNIFYCLGGITLTCFLVQVATGFAMTFYYRPTVTEAFASVQYIMTEANFGWLIRSVHRWSASMMVLMMILHVFRVYLTGGFKKPRELTWVTGVVLAVLTASFGVTGYSLPWDQIGYWAVKIVTGVPDAIPVignaSPLVELLRGSASVGQSTLTRFYSLHTFVLPLLTAVFMLMHFPMIRKQGISGPL	Atcg00720	YP_008563118.1	1	2	1	0.468	0.00301791	1	0	1	-	-	-	-	-	-	-	-	thylakoid-integral	Cp	-
Solyc12g005630	PETC	Cytochrome b6-f complex iron-sulfur subunit (AHRD V1 ***- A9PEX3_POPTR); contains Interpro domain(s) IPR005805 Rieske iron-sulphur protein, C-terminal	MASSTLSHVTPSQLCSSKSGISSVSQALLVKPMKINGHGMGKDNKRMKVKCMAASIPADDRVPDMEKRNLMNLLLLGALALPTGGMLVPYATFFAPPGSGGGSGGTPAKDANGNDVVVTEWLKTHAPGTRTLTQGLKGDPTYLVVENDGTLATYGINAVCTHLGCVVPWNTAENKFICPCHGSQYNNQGKVVRGPAPLSLALAHADVDDGKVVFVPWVETDFRTGDAPWWA	At4g03280	NP_001304899.1	3	44	3	1.61	0.0103821	5	3	8	Cp	25	3	Cp	Cp	Cp	Cp	0.9992	thylakoid-peripheral-lumenal-side	Cp	Cp
Solyc04g082010	PETE	Plastocyanin (AHRD V1 ***- Q0W9E5_SOLCO); contains Interpro domain(s) IPR000923 Blue (type 1) copper domain	MATVTSAAVAIPSFTGLKAGASSSSRVSTGASAKVAAAPVARLTVKASLKDVGAVVAATAVSAMLASNAMALEVLLGGDDGSLAFIPGNFSVSAGEKITFKNNAGFPHNVVFDEDEIPAGVDASKISMSEEDLLNAAGETYSVTLSEKGTYTFYCAPHQGAGMVGKVTVN	At1g70550	NP_001296192.1	1	44	1	5.31	0.0342416	5	3	8	Cp	62	1	Cp	Cp	Cp	Cp	1	thylakoid-peripheral-lumenal-side	Cp	Cp
Solyc10g044520	PETF	Ferredoxin I (AHRD V1 ***- Q93XJ9_SOLTU); contains Interpro domain(s) IPR010241 ferredoxin [2Fe-2S], plant	MASISGTMISTSFLPRKPAVTSLKAISNVGEALFGLKSGRNGRITCMASYKVKLITPEGPIEFECPDDVYILDQAEEEGHDLPYSCRAGSCSSCAGKVTAGSVDQSDGNFLDEDQEAAGFVLTCVAYPKGDVTIETHKEEELTA	At1g60950	NP_001234059.1	2	59	2	2.728	0.0175916	5	2	7	Cp	47	3	Cp	Cp	Cp	Cp	1	thylakoid-peripheral-stromal-side	Cp	-
Solyc10g075160	PETF	Ferredoxin I (AHRD V1 ***- Q93XJ9_SOLTU); contains Interpro domain(s) IPR010241 ferredoxin [2Fe-2S], plant	MASIPSTIVNTSFLPrRNASVVTSLKSIPNVGESLFGLKSGRSGRITCMATYKVKLITPEGPFEFDCPDDVSILDRAEETGLDLPYSCRAGACSSCAGKVTAGSVDQSDNSFLDDDQIDEGFVLTCVAYPKSNVTIQTHKEEDLVG	At1g60950	XP_004249046.2	2	11	2	2.162	0.0139417	5	3	8	Cp	47	2	Cp	Cp	Cp	Cp	1	thylakoid-peripheral-stromal-side	Cp	-
Solyc02g083810	PETH1 LFNR1	Ferredoxin--NADP reductase (AHRD V1 ***- D7MN04_ARALY); contains Interpro domain(s) IPR012146 ferredoxin--NADP reductase	MATAVSAAVSLPSSKSTSFSSRNSIISTDKINFNKVPLYYRNVSGASRLVSIRAQVTTEAPAKVEKISKKQEEGVIVNKFRPKEPYVGRCLLNTKITGDDAPGETWHMVFSTEGEVPYREGQSIGVIADGVDANGKPHKLRLYSIASSALGDFGDSKTHMFPCVSRGLCTPMTKGKKLKEFAQTSYVYPFYFSDLKPGAEVKITGPVGKEMLMPKDPNATVIMLATGTGIAPFRSFLWKMFFEKHEDYKFNGTAWLFLGVPTSSSLLYKEEFEKMKEKAPENFRLDFAVSREQTNEKGEKMYIQTRMAQYAEELWTLLQKDNTFIYMCGLKGMEQGIDEIMSSLAERDGIVWADYKKQLKKAEQWNVEVY	At1g20020	XP_004232495.1	20	395	11	42.652	0.275042	5	3	8	Cp	53	1	Cp	Cp	Cp	Cp	1	thylakoid-peripheral-stromal-side	Cp	Cp
Solyc02g062130	PETH2 LFNR2	Ferredoxin- NADP reductase (AHRD V1 ***- D7MN04_ARALY); contains Interpro domain(s) IPR012146 ferredoxin--NADP reductase	MAAALSASVSLQSSNSTSLSIKTIFISPENITFNKVLLCNRNVSVSRKVFHIRAQLTTEIPAKVAKVSKKQDEGVVVNKFRPKDPYIGRCLLNTKITGDDAPGETWHMVFSTEGEIPYREGQSIGVIPDGVDSNGKPHKLRLYSIASSALGDFGDSKTVSLCVKRLVYTNDKGEIVKGVCSNFLCDLKPGAEVKITGPVGKEMLMPKDPNATVIMLATGTGIAPFRGFLWKMFFEKHEDYKFNGLAWLFLGVPTSSSLLYKEEFEKMKEKAPENFRLDFAVSREQINEKGEKMYIQTRMAEYAEELWTLLKKDSTFVYMCGLKGMEQGIDDIMTSLAERDGINWANYKKQLKKAEQWNVEVY	At1g20020	XP_004233557.1	12	217	3	7.185	0.0463326	2	3	5	Cp	53	1	Cp	Cp	Cp	Cp	1	thylakoid-peripheral-stromal-side	Cp	Cp
Solyc02g068930	PETJ	Cytochrome c6 (AHRD V1 ***- D7MKY9_ARALY); contains Interpro domain(s) IPR003088 Cytochrome c, class I	MTVLCMIPSCLSKSCSLANPTKSRNVYEGDKPFVQRENKLACELKLLKSLALPLMTAFIALSPIVNPPVSIGQTTDVQKGASLFNRACIGCHYEGGNIIQPGATLFLKDLQRNGVDTEEEIYRVTYNGKGRMPGFGQNCTPRGQCTFGPRLQDDEIKLLAEFVKSQADQDWPKIENSGD	At5g45040	XP_004233233.1	2	10	2	0.425	0.00274062	5	2	7	Cp	4	4	-	-	Cp	Cp	0.9927	thylakoid-peripheral-lumenal-side	-	-
Solyc05g008450	FNR-like	Oxidoreductase FAD/NAD(P)-binding domain protein (AHRD V1 **-* B8JDQ6_AD2); contains Interpro domain(s) IPR001433 Oxidoreductase FAD/NAD(P)-binding	MSILSLSFSPFPNSSLSHLSSHAPSRIQSLHPSSSMTLLKPLHHHLrRNARLSISAAAAVRQDTNLWTTAPLVTVSPAAESLFHVTIDVSDYPDLANSHTKAGQYLQLRIPDVEKPSFLAIASPPSLAAAKGVFEFLVKSISGSTAELLCGLQKGDVVELSQVMGKGFDLDQISPAEEYQTVVIFATGSGISPIRSLIEAGFGADrRNASDVRVYYGARNLKRMAYQDRFENWASSGVKVVPVLSQPDDAWKGEDGYVQAAFARAKNIFNPQSTGAVLCGQKQMAEEVTSLLVADGVSTEKILKNF	At1g15140	XP_004238868.1	8	39	8	13.678	0.0882028	5	3	8	Cp	53	1	Cp	Cp	Cp	Cp	0.9929	plastid stroma	Cp	Cp
Solyc07g064940	HCF164	Thioredoxin family protein (AHRD V1 *-*- Q1EPD8_MUSAC); contains Interpro domain(s) IPR013766 Thioredoxin domain; HCF164- reduction cytochrome/b6f complex	MAKVASSsignalHRPKPFHFRPYQTLHSVKPFNYQLNNLQKYQRIYCQTEPKTGDCCQPSSDPYESAVKEKSSIDPGAGAESSKAEVSPPSTGPEYPTRDFNRRVALVSVIAALGLFSSQRLDLGVSLKDITAAALPYEEALSNGKPTVVEFYADWCEVCRELASDVYKVEQQYKDRVNFVMLNVDNTKWEQELDEFGVEGIPHFAFLDKDGNEEGNVVGRLPKQYLLENVDALAKGKESIPYSRAVGQYTSAESRKVHQISDPRSHG	At4g37200	XP_004244089.1	5	7	5	1.276	0.00822831	4	3	7	M	112	4	-	possibly M	Cp	Cp	0.9424	thylakoid-peripheral-stromal-side	Cp	Cp
Solyc09g092110	LIR1	LIR1-Light regulated protein-like protein (AHRD V1 ***- A8IXK8_BRACM); contains Interpro domain(s) IPR009856 Light regulated Lir1 (CCR-like)	MQAALFLTSIPLVKPPKPLTTSPLRCVSTHLKITHIKATPIDTSTVDYSSMNSSVFPAEACETIGGETCDVEMYPETKPKSTPSSKTLSMESVDREYLAYNEPKTVFLSEACDDLGGEFCEAKYQTGVY	At3g26740	XP_004247868.1	2	3	2	1.512	0.00975016	2	0	2	Cp	27	3	Cp	possibly ER	Cp	EX	0.522059	plastid	Cp	Cp
A Proteins were identified by acetone preparations and/or the gel method. For emPAI and Mol% calculations, only the data from the acetone prepartions were used. Proteins identified solely by the gel method have data for the number of peptides, PSMs and unique peptides.
B Names of tomato proteins were based on the literature, NCBI annotation (identified in BlastP searches), and/or SolyGenomics descriptor. In a small number of cases, tomato protein names were assigned based on NCBI annotations and the Arabidopsis homolog.
C Some Sol Genomics descriptors were updated when NCBI annotations and Arabidopsis gene annotations were aligned.
D Target P's subcellular locations are: chloroplast (Cp), mitochondria (M), secretory (S), and no predicted location is indicated by a dash (-).
E ChloroP was used to predict the presence of a chloroplast transit peptide (Y) and the lack of a predicted transit peptide is indicated with a dash (-).
F Predotar's predicted subcellular locations were: chloroplast/plastid (Cp),endoplasmic reticulum (ER) or mitochondrion (M). For proteins with localization predictions that were less clear, Predotar provided categorized of possibly Cp, M and ER. Proteins with unresolved locations or that did not have a homolog detected by Predotar are indicated with a dash (-).
G WoLF PSORT's and YLoc's predicted subcellular locations were: chloroplast/plastid (Cp), cytosol (C), cytoskeleton (Cy), endoplasmic reticulum (ER), extracellular (EX), golgi apparatus (G), mitochondrion (M), nucleus (N), peroxisomes (P), plasma membrance (PM), and vacuole (V). Proteins with no chloroplast location in WoLF PSORT are indicated by not Cp.The number of proteins predicted to be in t…

## Sheet: Table S5D- PSI
Table S5D. PSI and associated proteins detected in the tomato stromal proteome.
	Gene and protein descriptors and accessions						ProteomicsA								Algorithms								Databases
Category	Tomato Gene ID	Gene nameB	DescriptionC	Protein Sequence	Arabidopis homolog	Tomato protein NCBI accession	Peptides	PSMs	Unique Peptides	emPAI	Mol%	Acetone samples	Gel samples	Total	TargetP D ver.1	Transit peptide length	TargetP (reliability class)	ChloroP E	Predotar F	WoLF PSORT G	YLoc G	YLoc % Confidence	PPDB	SUBA4	plprot
Light-harvesting complex	Solyc03g115900	CAB11 LHCA11	Chlorophyll a-b binding protein P4, chloroplastic, Similar to AtLhcb4	MATVTTQASAAIFRPCASRTRFLTGSSGKLNREVSFRPSTFSSYNSFKVEAKKGQWLPGLASPDYLDGSLPGDNGFDPLGLAEDPENLKWFIQAELVNGRWAMLGVAGMLLPEVFTSIGILNVPKWYDAGKSEYFASSSTLFVIEFILFHYVEIrRNAWQDIKNPGSVNQDPIFKNYSLPPNKCGYPGGIFNPLNFAPTEEAKEKELANGRLAMLAFLGFIVQHNVTGKGPFDNLLQHLSDPWHNTIIQTLSN	At3g47470	NP_001316908.1 Schwartz et al 1991	1	1	0	0.292	0.00188297	1	0	1	Cp	48	4	Cp	Cp	Cp	Cp	100	thylakoid-integral	plastid	-
	Solyc12g011280	CAB8B	Chlorophyll a-b binding protein 8, chloroplastic, Similar to AtLhcb3	MATQALISSSSIASSTEAARQILGGRPFQSQIKKASFVVRATATPPVKQGANRPLWFASKQSLSYLDGSLPGDYGFDPLGLSDPEGTGGFIEPKWLAYGEVINGRFAMLGVVGAIAPEILGKAGLIPPETALPWFQTGVIPPAGTYNYWADGYTLFVLEMALMGFAEHrRNAFQDWAKPGSMGKQYFLGLEKGLGGSGDPAYPGGPFFNPLGFGKDEKSMKDLKLKEIKNGRLAMLGILGYFIQGLVTGVGPYQNLLNADHLADPANNNVLTSLKFH	At1g61520	XP_004251826.1	2	4	1	1.154	0.00744159	1	0	1	Cp	40	2	Cp	Cp	Cp	Cp	100	thylakoid-integral	plastid	plastid
	Solyc10g007690	CAB8A	Chlorophyll a-b binding protein 8, chloroplastic, Similar to AtLhcb3	MATQALISSSSISTSAEAARQIIGSRISQSVTRKASFVVRAASTPPVKQGANRQLWFASKQSLSYLDGSLPGDFGFDPLGLSDPEGTGGFIEPKWLAYGEVINGRFAMLGAAGAIAPEILGKAGLIPQETALAWFQTGVIPPAGTYNYWADNYTLFVLEMALMGFAEHrRNAFQDWAKPGSMGKQYFLGLEKGLGGSGDPAYPGGPLFNPLGFGKDEKSMKELKLKEIKNGRLAMLAVLGYFIQALVTGVGPYQNLLNADHLADPVNNNVLTSLKFH	At1g61520	NP_001332771.1 Pichersky et al 1989	2	9	1	0.995	0.00641628	3	2	5	Cp	40	1	Cp	Cp	Cp	Cp	100	thylakoid-integral	plastid	plastid
PSI	544163613	PSAA	Photosystem I P700 apoprotein A1 (chloroplast)	MIIRSPEPEVKILVDRDPVKTSFEEWARPGHFSRTIAKGPDTTTWIWNLHADAHDFDSHTSDLEEISRKVFSAHFGQLSIIFLWLSGMYFHGARFSNYEAWLSDPTHIGPSAQVVWPIVGQEILNGDVGGGFRGIQITSGFFQLWRASGITSELQLYCTAIGALVFAALMLFAGWFHYHKAAPKLAWFQDVESMLNHHLAGLLGLGSLSWAGHQVHVSLPINQFLNAGVDPKEIPLPHEFILNRDLLAQLYPSFAEGATPFFTLNWSKYADFLTFRGGLDPVTGGLWLTDIAHHHLAIAILFLIAGHMYRTNWGIGHGLKDILEAHKGPFTGQGHKGLYEILTTSWHAQLSLNLAMLGSLTIVVAHHMYSMPPYPYLATDYGTQLSLFTHHMWIGGFLI…	Atcg00350	YP_008563088.1	1	1	1	0.155	0.00099952	1	0	1	-	-	-	-	-	-	-	-	thylakoid-integral	plastid	-
	544163612	PSAB	Photosystem I P700 apoprotein A2 (chloroplast)	MALRFPRFSQGLAQDPTTrRNAIWFGIATAHDFESHDDITEERLYQNIFASHFGQLAIIFLWTSGNLFHVAWQGNFESWVQDPLHVRPIAHAIWDPHFGQPAVEAFTRGGALGPVNIAYSGVYQWWYTIGLRTNEDLYTGALFLLFLSAISLIAGWLHLQPKWKPSVSWFKNAESRLNHHLSGLFGVSSLAWTGHLVHVAIPASRGEYVRWNNFLDVLPHPQGLGPLFTGQWNLYAQNPDSSSHLFGTAEGAGTAILTLLGGFHPQTQSLWLTDIAHHHLAIAFIFLVAGHMYRTNFGIGHSMKDLLDAHIPPGGRLGRGHKGLYDTINNSLHFQLGLALASLGVITSLVAQHMYSLPAYAFIAQDFTTQAALYTHHQYIAGFIMTGAFAHGAIFFIRD…	Atcg00340	YP_008563087.1	3	8	2	1.154	0.00744159	4	0	4	-	-	-	-	-	-	-	-	thylakoid-integral	plastid	-
	544163665	PSAC	Photosystem I subunit VII (chloroplast)	MSHSVKIYDTCIGCTQCVRACPTDVLEMIPWDGCKAKQIASAPRTEDCVGCKRCESACPTDFLSVRVYLWHETTRSMGLAY	Atcg01060	YP_008563140.1	1	10	1	0.778	0.00501695	5	3	8	-	-	-	-	possibly ER	Cp	-	-	thylakoid-peripheral-stromal-side	plastid	-
	Solyc06g054260	PSAD	Photosystem I reaction center subunit II PsaD	MAMATQASLFTPPLSVPKSTTAPWKQSLVSFSTPKQLKSTVSVTRPIRAMAEEAPAATEEKPAPAGFTPPQLDPNTPSPIFGGSTGGLLRKAQVEEFYVITWESPKEQIFEMPTGGAAIMRQGPNLLKLARKEQCLALGTRLRSKYKINYQFYRVFPNGEVQYLHPKDGVYPEKVNPGREGVGQNFRSIGKNKSAIEVKFTGKQVYDI	At1g03130	NP_001295880.1	3	6	3	0.701	0.00452041	4	2	6	Cp	48	1	Cp	Cp	Cp	Cp	100	thylakoid-peripheral-stromal-side	plastid	-
	Solyc09g063130	PSAE	Photosystem I reaction center subunit IV A , PsaE	MASSSMASAASGFMVATPNVTSNSAPKSSMLSFSSKNTTTNIPRLVVRAAEEAAPPAPTATAEGEAPPAKAVKPPPIGPKRGTKVRILRKESYWYKGTGSVVAVDQDPKTRYPVVVRFNKVNYANVSTNNYALDEVEEVK	At2g20260	XP_004247116.1	1	2	0	0.468	0.00301791	2	0	2	Cp	48	1	Cp	Cp	Cp	Cp	100	thylakoid-peripheral-stromal-side	plastid	-
	Solyc02g069460	PSAF	Photosystem I reaction center subunit III, PsaF	MSLTIPTSLSKPISTSKFGSQFTTKQRTSAIVCCSNQTPVSNSTEESSSSLKAFSAALALSSILLSAPVLPASADISGLTPCKDSKQFAKREKQQIKKLQNSLKLYAPDSAPALAINATIEKTKrRNAFDNYGKQGLLCGSDGLPHLIVSGDQRHWGEFITPGILFLYIAGWIGWVGRSYLIAVRDEKKPTMKEIIIDVPLANRLVWRGFIWPVAAYREYLNGDLIDPNV	At1g31330	XP_004233198.1	3	4	1		0.00744159	0	1	1	Cp	33	1	Cp	Cp	Cp	Cp	100	thylakoid-integral	plastid	plastid
	Solyc07g066150	PSAG	Photosystem I reaction center subunit V, PsaG	MASALFSAPTFQGLRPLNKPTDSSLFLNKPIAFKPITKKPRNLAVKAELNPSVVISLSTGLSLFLGRFVFFNFQRENVAKQVPSQNGISHFEAGDVRAKEYISLLKSNDPVGFNIVDVLAWGSIGHIVAYYILATSSNGYDPSFFG	At1g55670	XP_004244001.1	1	1	1	1.154	0.00744159	1	0	1	Cp	97	1	Cp	Cp	Cp	Cp	100	thylakoid-integral	plastid	-
	Solyc08g006930	PSAK	Photosystem I reaction center subunit X psaK	MASTMMTTLPQFNGLKPQPFSASPIQGLVAIQPrRNANKGQGGLGARCDFIGSSTNLIMVTSTSLMLFAGRFGLAPSANRKATAGLKLEVRDSGLQTGDPAGFTLADTLACGT	At1g30380	XP_004244537.1	2	4	2	3.642	0.0234855	4	3	7	Cp	34	3	Cp	Cp	Cp	Cp	100	thylakoid-integral	plastid	plastid
	Solyc06g082940	PSAL	Photosystem I reaction center subunit XI, PsaL	MATAASPMASQLKSSFTSSLTRGHGLVTPKGISGAPFKIFPSTRKSCFTIKAVQADKPTFQVIQPLNGDPFIGSLETPVTSSPLIAWYLSNLPAYRTAVNPLLRGVEVGLAHGFLLVGPFVKAGPLRNTAYAGGAGSLAAAGLVVILSMCLTIYGISSFKEGDPSTAPALTLTGRKKVPDQLQTADGWAKFTGGFFFGGISGVTWAYFLLYVLDLPYFVK	At4g12800	XP_004242464.1	2	5	0	0.585	0.00377238	3	2	5	Cp	46	2	Cp	Cp	Cp	Cp	100	thylakoid-integral	plastid	-
	Solyc08g013670	PSAN	Photosystem I reaction center subunit, PsaN	MAAMNSSVLACSYAISGMSSSELTSKHTVTTMSSPSLQKLPLIIKAQQQSSSNISAGrRNAVALLGLAAALFTSASSANAGVIDEYLEKSQANKELNDKKRLATSGANFARAYTVQFGTCKFPENFTGCQDLAKQKKVPFISDDLALECEGKDKYKCGSNVFWKW	At5g64040	NP_001316061.1	1	16	1	0.334	0.00215381	4	3	7	Cp	72	1	Cp	Cp	Cp	Cp	100	thylakoid-peripheral-lumenal-side	plastid	plastid
	Solyc10g005050	PSAP pTAC8 CURT1B	Photosystem I reaction center subunit, PsaP; CURVATURE THYLAKOID 1B, chloroplastic; Plastid transcriptionally active 8	MASTTTPSLSLSSSSTLVDGKTTRQSAAVASSQCVTLPTLPPRPAVQSRAARTTAYCRKIARNVAAMATSTGEVATADATAETATTELPSELVQKIQEVWDKVDDKYAVSSLGVAAFILLWSSTGVISAIDRLPLIPGVLELVGIGYTGWFAYKNLIFKPDREALIAKIKELYKDILGSS	At2g46820	XP_004248418.1	2	2	2	1.512	0.00975016	2	0	2	Cp	65	1	Cp	Cp	Cp	Cp	99.8	thylakoid	plastid	plastid
	Solyc03g005190	FDC1	Ferredoxin (AHRD V1 *-*- Q8LD29_ARATH); contains Interpro domain(s) IPR010241 ferredoxin [2Fe-2S], plant	MAPNSIKKLRKLPHVFSKVLQLPIPSDADVEVVENPDFFRFMAKMDQHGENIRNVRAQTVEIHPGITKIVVVRNGGEAMLDQLNVDTWRFRLPTSTKPELATAAFADGELIVTVPKGVNGRGGKDVLLIHTNKTLTLTFSSLTMATIQLTTSPSLTLIPSRKQANLAAIKLNSPWSVrRNARENrRNAVSSVVRAYKVIVEHEGKTTELEVEPDETILSKAIDVGMSVPYDCKLGVCMTCPAKLLSGNVDQSEGMLSDDVVERGYALLCAAYPRSDCHIRVIPEEELLSLQLATADD	At4g14890	XP_004234013.1	3	8	3	0.54	0.0034822	5	3	8	S	-	5	-	none	Cp	Cp	92.1	plastid	plastid	-
	Solyc08g077050	FDC2	Ferredoxin family protein (AHRD V1 ***- D7KHL5_ARALY); contains Interpro domain(s) IPR010241 Ferredoxin [2Fe-2S], plant	MDLQSPCSACTSLHRKPPLGRRLFSLNSVNFPLNSVKCRRNTTPKVQTPVAVAVSGQNGSSYSPSVPTHKVTVLDRQRGVVHEFLVPEDQYILHTAEAQNITLPFACRHGCCTSCAVRVKSGELRQPEALGISAELKSKGYALLCVGFPSSDLEVETQDEDEVYWLQFGRYFARGPIERDDYALELAMGDE	At1g32550	XP_004245886.1	3	14	3	4.179	0.0269484	5	3	8	Cp	50	1	Cp	possibly Cp	Cp	Cp	100	plastid	plastid	-
PSI assembly	Solyc06g048540	ABCI6	FeS assembly ATPase SufC (AHRD V1 **** B5W7S4_SPIMA); contains Interpro domain(s) IPR010230 ATPase SufC, SUF system FeS cluster assembly, Similar to AtNAP7	MAVFSPTCSSTSPLLSFRNNISFFPSHRPSFPGVRCTLTVKATVSVESPSSSSTDCRDDSPKVLLEVRDLSAVIVESKQQILNGVNLTVRQGEVHAVMGKNGSGKSTFAKVLVGHPDYEITGGSVSFKGENLLEMEPEERSLAGLFMSFQSPVAIPGVSNIDFLNMAYNAQRRKLGLPELGPIEFYGYIAPKLELVNMKIDFLNRNVNEGFSGGERKRNEILQLAVLGADLAILDEIDSGLDVDALRDVAKAVNGLLSPKNSVLMITHYLRLLEFIKPTYIHIMEKGRIVKTGDISIAKVLEKEGYKAISGP	At3g10670	NP_001353544.1	11	61	11	5.813	0.0374852	5	3	8	Cp	35	1	Cp	Cp	Cp	Cp	100	plastid stroma	plastid	-
	Solyc07g064940	HCF164	Thioredoxin family protein (AHRD V1 *-*- Q1EPD8_MUSAC); contains Interpro domain(s) IPR013766 Thioredoxin domain; HCF164- reduction cytochrome/b6f complex	MAKVASSsignalHRPKPFHFRPYQTLHSVKPFNYQLNNLQKYQRIYCQTEPKTGDCCQPSSDPYESAVKEKSSIDPGAGAESSKAEVSPPSTGPEYPTRDFNRRVALVSVIAALGLFSSQRLDLGVSLKDITAAALPYEEALSNGKPTVVEFYADWCEVCRELASDVYKVEQQYKDRVNFVMLNVDNTKWEQELDEFGVEGIPHFAFLDKDGNEEGNVVGRLPKQYLLENVDALAKGKESIPYSRAVGQYTSAESRKVHQISDPRSHG	At4g37200	XP_004244089.1	5	7	5	1.276	0.00822831	4	3	7	M	112	4	-	possibly M	Cp	Cp	94.2	thylakoid-peripheral-stromal-side	plastid	plastid
	Solyc12g007010	HCF101	Cytosolic Fe-S cluster assembly factor NUBP2 homolog (AHRD V1 *--- NUBP2_NEMVE); contains Interpro domain(s) IPR019591 ATPase-like, ParA/MinD	MTLLQAPSSPTLTFHQYCTSQSKAGLYVAEKSFIQSTLSGSCFLSSQRQVKGLNFSYTCSRLSSVTAKAASNGACAPSVSGQTADSEVLKALSQIIDPDFGTDIVSCGFVKDLLVDENLGEVSFQLELTTPACPIKDMFEQKANEVVAELPWVKKVNVTMSAQPAKPIYAGQLPAGLQTISNIIAVSSCKGGVGKSTVAVNLAYTLADMGARVGIFDADVYGPSLPTMVSPENRILEMNAEKRTIIPTEYMGVKLVSFGFAGQGRAIMRGPMVSGVINQLLTTTEWGELDYLVIDMPPGTGDIQLTLCQVVPLTAAVIVTTPQKLAFIDVAKGVRMFSKLKVPCVAVVENMCHFDADGKRYYPFGRGSGSQVVQQFGIPHLFDLPIQPALSASGDSGMP…	At3g24430	NP_001311103.1	7	19	7	1.448	0.00933745	5	3	8	Cp	66	3	Cp	Cp	Cp	M	51.9	plastid stroma	plastid	-
	Solyc01g079220	NFU1	NFU1-like; may be involved in iron-sulfur cluster assembly	MAHLAAMGVSQISSSIYMPELPLKSQNPQPSSIFLKRIGVAHKRFNLVKATVDGSPVPAPSPGLYSAKQFELTPENVDMVLEDVRPYLISDGGNVEVVSVEDGVVSLQLQGACESCPSATTTMKMGIERVLKEKFGEAIKDIRQVYNEQVVETTAEAVNAHLDILRPAIKNFGGSVEVLSVEEGNCNVKYVGPESIGSGVKAAIKEKFPDILNVVFTD	At4g01940	XP_004229373.1	2	8	2	0.931	0.00600357	5	2	7	Cp	49	3	Cp	Cp	Cp	Cp	96.7	plastid stroma	plastid	-
	Solyc01g106090	PPD1 PSB27-like	PsbP-domain protein1	MRVLQASNIYGVGFGIPSISTRPNSSYHRHATIATGEALAKSAPIGRKFSEQHSLKKGDMEKEGNSVVLEKKDFAVPrRNAKAMALILSSFVLSNYELPKVAYAQSVEFREYIDTFDGYSFMYPRNWIQVRGAGADIFFRDPLVLDENLSVEISSPSSSKYKSVKDLGPPEEAGKGVLKQYLTEFMSTRLGVrRNAESSVLSTSSRVADDGKLYYDVEVNIKSYANNNELAVMPQDRVARLEWDrRNAYLSVLGVENNCLYELRIQTPEKVFVQEESDIRAIMNSFRANKIAA	At4g15510	XP_004230618.1	11	68	11	6.079	0.0392005	5	3	8	M	80	3	-	none	Cp	Cp	100	thylakoid-peripheral-lumenal-side	plastid	plastid
	Solyc01g006130	PSA2	Photosystem I Assembly 2, chloroplastic (NCBI)	MASHLSFSTPSALWGSYLNPKSSSLSQLNMKKRVGSHVNCSSEDESCTSASSEHLREHVEEKRSQTSVSRRWCLTCLCSTGALITASGNPISEPRAIALDGNESPGCRNCGGSGAIICDMCGGTGKWKALNRKRAKDVYEFTECPNCYGRGKLVCPVCLGTGLPNNKGLLRRPDARKLLDKMYNGRLLLKAVLHQKDNEKRLKVTMDVTTIVLLSVPVKSLDELSFSP	At2g34860	XP_004228692.1	2	2	2	-	0	0	1	1	Cp	39	1	Cp	Cp	Cp	C	72.1	thylakoid-peripheral-lumenal-side	plastid	plastid
	Solyc02g086890	PSA3	Photosystem I assembly factor 3	MVVVSSLHSPSSSSSIYCNSISPSLRYFRRFYTFPSRRNNSNSNGGAVLLVKAYMDETTNPISSFANKVignaSLPVFGLIARIVNEEGGVGGDFIDFAEFRRRVGNKCSINDSRAFYEFRDRRGKTGDPLYVLLCCWLAAVGAGLLKSEEILEGVARLSLANDIEFEEQNFIAMMNEAREKRSKLGAPAPTIPMEFRAEKALEAIHVCCYGRDLIDEEDEKLLSTMLNAVFPTVGRQKVEIIVKEKAKRMADGTEEIKYEPKQLSKEAVQMQMKDLEFLKQNSLNQ	At3g55250	XP_004232292.1	5	29	5	1.738	0.0112075	5	3	8	Cp	52	2	Cp	Cp	Cp	Cp	96.2	thylakoid-peripheral-stromal-side	plastid	-
	Solyc10g005180	Y3IP1	Ycf3-interacting protein 1	MALQLPFPLISSSLSSSLPLLTSSNCKICSISISPFTHKRLLSHSNLQNFGFSSRGRSNSLFVSQEDTQLTNEEESSISTATQQDDDDPDPESLEYVSQIKRVLELLKRNRDMLFGEVKLTIMIEDPRDIERKRLLGIDDENAPTRDDLAACLEEINEGEVPKDRVALQMLAEEMNSWPNLEVEALKQNKSRSLYAKATDTGIDPKEAAKRLKIDWDSAAEIEEAADSDEPDVPPILGYGALYLVSALPIIIGISVVLILFYNSLQ	At5g44650	XP_004248408.1	3	10	3	2.162	0.0139417	5	0	5	Cp	79	1	Cp	Cp	Cp	PM	81.3	thylakoid	plastid	plastid
	544163614	YCF3	Photosystem I assembly protein ycf3 (chloroplast)	MPRSRINGNFIDKTFSIVADILLRVIPTTSGEKEAFTYYRDGMSAQSEGNYAEALQNYYEAMRLEIDPYDRSYILYNIGLIHTSNGEHTKALEYYFRALERNPFLPQAFNNMAVICHYRGEQAIQQGDSEIAEAWFDQAAEYWKQAIALTPGNYIEARNWLKITrRNAFE	Atcg00360	YP_008563089.1	3	18	3	1.683	0.0108529	5	2	7	-	-	-	-	-	-	-	-	thylakoid-peripheral-stromal-side	plastid	-
A Proteins were identified by acetone preparations and/or the gel method. For emPAI and Mol% calculations, only the data from the acetone prepartions were used. Proteins identified solely by the gel method have data for the number of peptides, PSMs and unique peptides.
B Names of tomato proteins were based on the literature, NCBI annotation (identified in BlastP searches), and/or SolyGenomics descriptor. In a small number of cases, tomato protein names were assigned based on NCBI annotations and the Arabidopsis homolog.
C Some Sol Genomics descriptors were updated when NCBI annotations and Arabidopsis gene annotations were aligned.
D Target P's subcellular locations are: chloroplast (Cp), mitochondria (M), secretory (S), and no predicted location is indicated by a dash (-).
E ChloroP was used to predict the presence of a chloroplast transit peptide (Y) and the lack of a predicted transit peptide is indicated with a dash (-).
F Predotar's predicted subcellular locations were: chloroplast/plastid (Cp),endoplasmic reticulum (ER) or mitochondrion (M). For proteins with localization predictions that were less clear, Predotar provided categorized of possibly Cp, M and ER. Proteins with unresolved locations or that did not have a homolog detected by Predotar are indicated with a dash (-).
G WoLF PSORT's and YLoc's predicted subcellular locations were: chloroplast/plastid (Cp), cytosol (C), cytoskeleton (Cy), endoplasmic reticulum (ER), extracellular (EX), golgi apparatus (G), mitochondrion (M), nucleus (N), peroxisomes (P), plasma membrance (PM), and vacuole (V). Proteins with no chloroplast location in WoLF PSORT are indicated by not Cp.The number of proteins predicted to be in t…

## Sheet: Table S5E- Ndh
Table S5E- NDH complex and associated proteins
	Gene and protein descriptors and accessions						ProteomicsA					Number of times detected			Algorithms								Databases
Category	Tomato Gene ID	Gene nameB	DescriptionC	Protein Sequence	Arabidopis homolog	Tomato protein NCBI accessionB	Peptides	PSMs	Unique Peptides	emPAI	Mol%	Acetone samples	Gel samples	Total	TargetP D ver.1	Transit peptide length	TargetP (reliability class)	ChloroP E	Predotar F	WoLF PSORT G	YLoc G	YLoc % Confidence	PPDB	SUBA4	plprot
NDH Subcomplex A	544163670	NDHH	NADH-plastoquinone oxidoreductase subunit 7 (chloroplast)	MTAPTTRKDLMIVNMGPQHPSMHGVLRLIVTLDGEDVVDCEPILGYLHRGMEKIAENRTIIQYLPYVTRWDYLATMFTEAITINGPEQLGNIQVPKRASYIRVIMLELSRIASHLLWLGPFMADIGAQTPFFYIFRERELIYDLFEAATGMRMMHNYFRIGGVAADLPYGWIDKCLDFCDYFLTGVAEYQKLITRNPIFLERVEGVGIIGRDEALNWGLSGPMLRASGIEWDLRKVNADHYESYDEFDWQVQWQREGDSLARYLVRIGEMTESIKIIQQALEGIPGGPYENLEMrRNAFDRLKDPEWNDFEYRFISKKPSPTFELSKQELYVRVEAPKGELGIFLIGDQSVFPWRWKIRPPGFINLQILPQLVKRMKLADIMTILGSIDIIMGEVDR	Atcg01110	YP_008563145.1	11	47	11	9	0.0580367	5	3	8	-	-	-	-	-	-	-	-	thylakoid	plastid	-
	544163668	NDHI	NADH-plastoquinone oxidoreductase subunit I (chloroplast)	MLPMITEFINYGQQTIRAARYIGQGFMITLSHANRLPVTIQYPYEKLITSERFRGRIHFEFDKCIACEVCVRVCPIDLPVVDWKLETDIRKKRLLNYSIDFGICIFCGNCVEYCPTNCLSMTEEYELSTYDRHELNYNQIALGRLPMSVIDDYTIRTISNLPQINNE	Atcg01090	YP_008563143.1	4	20	3	2.162	0.0139417	5	2	7	-	-	-	-	-	-	-	-	thylakoid-peripheral-stromal-side	plastid	-
	544163616	NDHJ	NADH-plastoquinone oxidoreductase subunit J (chloroplast)	MQGRLSAWLVKHGLIHRSLGFDYQGIETLQIKPEDWHSIAVIFYVYGYNYLRSQCAYDVAPGGLLASVYHLTRIEDGVAQPEELCIKVFASrRNANPRIPSVFWVWKSVDFQERESYDMLGISYDNHPRLKRILMPESWIGWPLRKDYIAPNFYEIQDAH	Atcg00420	YP_008563091.1	6	20	6	6.499	0.0419089	5	3	8	-	-	-	-	-	-	-	-	thylakoid	plastid	-
	Solyc04g057980	NDHM	NAD(P)H-quinone oxidoreductase subunit M (AHRD V1 *-*- D8G7H3_9CYAN); contains Interpro domain(s) IPR018922	MAATSTYMASTHFSMLSWSTKGKNKQLKrRNANFFSVSAQQAEVEELKLKKEEEKKEEEKQEEGAMKKPRPVEPQINVQSKNMTREHGGQWLSSATRHVRIYAAYIDPETFAFDQTQMDKLTLLLDPTDEFVWTDDTCTKVYSYFQELVNADHYEGAPLTEYTLRLIGSDIEHYIRKLLYNGEIQYNMNARVLNFSMGKPRVGFNYNGQMEDVNQ	At4g37925	XP_004237361.1	3	13	3	2.162	0.0139417	5	2	7	Cp	36	5	Cp	Cp	Cp	Cp	71.1	thylakoid	plastid	-
	Solyc09g083150	NDHN	NAD(P)H-quinone oxidoreductase subunit N (AHRD V1 *-*- D4ZT43_SPIPL)	MTTLSYTFPSTTSSSSSTRRFLITSNGSSCRRRPNISTEDQPCSSSACYQGAVQSYGLQRQRVQLNGISKAVRTRRLDSVGRQKKGAIRCNIELQDFIGGDLIKPDLGQWLSDVEEHKAIAIYSPHEGGYEGRYLTRLKYQGYHFLDLSARGLGDPETTLTKFHPVCPAHVGKQPIARWYFPPEVDYRLSLLPPDAKGLVVWIIEAKVLSKAELQFLALLPTLRPNVRVIAECGNWRKFMWKPLKEIADLSQS	At5g58260	XP_004247632.1	3	8	3	0.931	0.00600357	2	1	3	Cp	49	3	Cp	Cp	Cp	Cp	91.6	thylakoid	plastid	plastid
	Solyc11g006020	NDHO	NAD(P)H-quinone oxidoreductase subunit O (AHRD V1 *-*- NNADHO_GLOVI)	MAFSAAFSHTSFIYSSSFSQTRKNRINYSPFVIKAENSSSEPQENNEKPKSQAAAATTTSSSTTATATKPKKPVYSMKKGQIVRVEKEKYLNSINYLSVNADHPPYYKGLDYIYEDRGEVLDIRIFETGEYALIGWIGIPTAPAWLPTEMLIKSDKLDYERI	At1g74880	XP_004249910.1	5	54	5	20.544	0.132478	5	3	8	Cp	34	2	Cp	Cp	Cp	Cp	80.1	thylakoid	plastid	plastid
NDH Subcomplex E	Solyc08g082400	NDHS CRR31	NAD(P)H-quinone oxidoreductase subunit S, chloroplastic	MASASSFQLSSLQIQTPPLKKSNFLGQSVNLNLSSSVHTKSAMKSSSNSVTPIAKFNLYEILGGRGLCNGEEGIEKELKKSISEEQKAVGSAAAAASDDDNQENKETGEIPEDGFEKEMMGFTGGFPGGEKGLMKFIEKNPPPPPPKKTESSMVSGFNQSLVKKPKPPELPLLLPGMIAIVKNSNNPYYMYCGIVQRITDGKAAVLFEGGNWDRLISFRLEELERREKGPPMVNLKSVILEKMVEKSSEA	At4g23890	XP_004245512.1	9	44	9	12.895	0.0831536	5	3	8	Cp	75	1	Cp	Cp	Cp	Cp	84.8	thylakoid	plastid	plastid
	Solyc06g082970	NDHU CRRL	NAD(P)H-quinone oxidoreductase subunit U, chloroplastic (NCBI); DnaJ domain family (AHRD V1 ***- Q84VQ4_ARATH); contains Interpro domain(s) IPR001623 Heat shock protein DnaJ, N-terminal	MAATPNIYTQKFPTITTQNYIASNNVTCFIDFRKQSRKLALIVGNSSSSDTASAIDTDETSPVEIPPSIISALNVEKALLGIAITDINHYGILGLSRKCSYAEVPVAYKKKIEEITNEGLVEEELNKKLQLLKESYSILSTPEERRLYDWSLVRSEAPDDYKWPFEVDPTPPSTGTPPPQEPEDVEPTILVGYFFLGWFVLAAVLSISLNL	At5g21430	XP_004242446.1	3	14	3	3.642	0.0234855	5	0	5	Cp	43	5	Cp	possibly Cp	Cp	C	72.8	thylakoid-integral	plastid	plastid
	Solyc09g018890	NDHV	Uncharacterized protein	MATTGGSISLSSFPSSSFCRKPKPILPADSLELRHLKTCKNLVCFAAQESSSLTVAEEKKESQTAEEKTKAKAPDKPLHQMMEENIIPSLKATLESQNDILELELSFSENKLEGSFLKKGNPYSFWAFFPDGLTGPKGFSLSSYGSGASTVEPFLVDEKKITAKHVVFWVEKRLAAQGIIPVWKE	At2g04039	XP_004246251.1	5	31	5	9	0.0580367	5	3	8	Cp	55	2	Cp	Cp	Cp	Cp	98.4	plastid	plastid	-
NDH Subcomplex L	Solyc10g054420	PNSL1	Photosynthetic NDH subunit of lumenal location 1, Photosystem II oxygen evolving complex protein PsbP-like	MAATSLSLNLGLPSPAANNLNRHGLHNIITCSASENTSPNQQRCLMrRNASYLLGAGALSLGLLLPATPLLAQGVPENYEIFVDKRDGYSYYYPSDWREFDFRGHDSAFKDRYLQLQNVRLSFIPTDKTDIHDLGPMQEVVPDLVKHVYSAPNQVANIMEMKERTTDGKNYFTFEYVLTSPNFSRAAFATIAIANGRYYTLIVGANErRNAWRKFRNKLKVVADSFQVLDI	At2g39470	XP_004248685.1	3	7	3	1.154	0.00744159	4	3	7	Cp	32	1	Cp	Cp	Cp	Cp	100	thylakoid-peripheral-lumenal-side	plastid	plastid
	Solyc05g007780	PNSL2	Photosynthetic NDH subunit of lumenal location 2, Oxygen evolving enhancer protein 2	MTTFTNPTTLFHPKTKITKTHHTQCKTLPKIQSNLSTNEQNFSCRRKLIATFLVTPLTLGLQFTPLALAENWGVRSFLREHFFEPGLSPEDAVARIRQTADGLHSIKEMLETNSWRYVLFYIRLKSAYLKQDVKNALSRVPESRKESYIKTVNELTDNMAEFDYYIRTPKVYESRVFYEKTLKSIDELVGLLA	At1g14150	XP_010320690.1	1	6	1	0.778	0.00501695	3	3	6	Cp	75	4	Cp	possibly Cp	Cp	M	84.1	thylakoid-peripheral-lumenal-side	plastid	-
	Solyc10g006530	PNSL3	Photosynthetic NDH subunit of lumenal location 3, Oxygen evolving enhancer 3 family protein	MANTTNLNIIFEALPLIPKIEKIQKKAKTISQKNKEIQENSPPKITRRLALSIGSIALFANSRIDISLAEDNNGFFITGPLQDPSISTIITAAQVNDKQPLTDLANRLFDNVEKLEDAVKKKNLPQTQSCYQETTTILQQVMDRMA	At3g01440	XP_004248376.1	2	4	2	1.512	0.00975016	4	1	5	Cp	67	4	-	none	Cp	Cp	99.3	thylakoid-peripheral-lumenal-side	plastid	plastid
	Solyc04g054520	FKBP16-2 PNSL4	Peptidyl-prolyl cis-trans isomerase (AHRD V1 *-*- D8PA41_9BACT); contains Interpro domain(s) IPR001179 Peptidyl-prolyl cis-trans isomerase, FKBP-type	MAVSSLSFTLPKLQTFTPKPTIAATFKASSSHESTPFINKKQIFQMGVGILAASIVASAPLDADATRIEYYATTAEPTCEFNFVRSGLGYCDIAVGSGEEAPYNKLVNIHYTARFGDGIVFDSSYKRGRALTMRLGMGKVIKGLDQGILGGEGVPPMLVGGKRKLQIPPHLAYGPEPAGCFSGDCNIPGNATLVYDIKFVELYSGNRKM	At4g39710	NP_001329278.1 Waseem et al (2018)	4	7	4	4.179	0.0269484	4	3	7	Cp	51	5	Cp	Cp	Cp	Cp	85.5	thylakoid-peripheral-lumenal-side	plastid	plastid
	Solyc01g009990	CYP20-2 PNSL5	Peptidyl-prolyl cis-trans isomerase (AHRD V1 ***- B9RMA5_RICCO); contains Interpro domain(s) IPR002130 Peptidyl-prolyl cis-trans isomerase, cyclophilin-type	MAATFASVSNLGSISVPRVANPTYAAYPKLLKSSFSSSSLFGGSLRLDTSSNRSVHKKTGGSSGSIQAAVEVADLQSKVTNKVYFDISIGNPVGKLAGRIVignaLYGDDVPQTAENFRALCTGEKGFGFKDSAFHRVIKDFMIQGGDFDKGNGTGGKSIYGRTFKDENFKLVHTGPGIVSMANAGPNTNGSQFFICTVKTPWLDQKHVVFGQVLEGMDIVKLIESQETDRGDRPRKRVVISDCGELPIV	At5g13120	XP_004228428.1	10	191	10	30.623	0.197473	5	3	8	Cp	67	1	Cp	Cp	Cp	Cp	99.9	thylakoid-peripheral-lumenal-side	plastid	plastid
NDH Subcomplex B	Solyc03g116870	PNSB1 NDH48 NDF1	NAD(P)H dehydrogenase subunit 48; photosynthetic NDH subunit of subcomplex B 1 (NCBI)	MAASTTLLSNSISPFFANPPNFPVTHVTNVPFLNHNPSFPARKSGNFCLNAKKKNPWLDPFDYGDDPEMEYGSLFSEGKQDEDPRPPDNPDNPYGFLKFPMGYSVEIASLGLKIRGDVRRCCCVIDGGVYENLLFFPVIQMIKDRYPGVQVDILATARGKQTFEMNKNVRWANAYDLDDDFPEPAEYTDMLGILKSRYYDMILSTKLAGIGHAVFLFMSTARDRVSYIYPNVNSAGAGLFLSETFTPESMNLSEGGYHMYRQMVDWLGRPARKVPRQPLPPLKVSISRKVREVVEAKYKNVGAQKGKYIVIHGIKSDSKASMQSRGDIDSLLPIEIWAEIAEEIRGVKPVFVIPHEKERENVEDAVGYDASIVFITTPGQLAALVDDSAGVIATNTAAI…	At1g15980	XP_004235943.1	1	2	1	0.136	0.000876999	2	0	2	Cp	48	2	Cp	Cp	Cp	Cp	94.7	thylakoid	plastid	plastid
	Solyc03g062720	PNSB2 NDH45 NDF2	Photosynthetic NDH subunit of subcomplex B 2, chloroplastic	MAAAAVLSLSLPKLNNAIKASSGSSSSTTTFAPESLEEKFGRKGIKFSDGGTVELTVRNGSSVKLQIPNAHITSYKPKVYWKDDGFEEVLYTLPNSRGGIALVINEILEPNPKLPVPKTTTPSDQWTLTDVDSDSIDALQVELSCSRGSLDINYVVSLYPLSIATAVILKNNGRKPVKLTTAILSHLMSKTRKGTGIQGLRSCTYCTHPPLSSSFEILSPGEAMKTEEPGMFSFGWEPENKPGIWSTQDVPITVLKHKLSRLYSVPPQEKAKDFYNSIPSKYETIDQGRELFFRIIRLGFEDIYVSSPGSFSEKYGKDYFICTGPASMLVPLVINPGEEWRGAQVIEHDNL	At1g64770	XP_004234806.1	4	37	4	4.179	0.0269484	5	3	8	Cp	19	2	Cp	Cp	Cp	Cp	96.9	thylakoid	plastid	plastid
	Solyc08g083360	PNSB3 NDF4	NDF4, NADH-DEPENDENT CYCLIC ELECTRON FLOW 1, PHOTOSYNTHETIC NADH SUBCOMPLEX B 3, PNSB3	MRAIEIYWYGGLAASTLSQSSLSCISKVHQRCLRTKIKAVASSHEKEEACVKFAFVSSVLLPDGTPDVQLRKACGGQKLRDIMLDANVELYGPYARPLLNCGGGGTCATCLVEVVEGKELLNPRTDKENENLKRHPNNWRLACQAIVGKPDSRGMMTIQQLPEWKAHEWNYRGLPPNEEEEEEAASISSSSA	At3g16250	XP_004245440.1	1	3	1	0.292	0.00188297	3	2	5	M	32	5	-	none	Cp	Cp	91.2	thylakoid	plastid	plastid
	Solyc12g036170	PNSB4 NDF6	NADH Dependent flow 6 (NDF6); NADH complex. photosynthetic NADH subunit of subcomplex B 4	MSFTFIKPSIPSPTSELLHPFSKSRLRHCPTSPFGNNAGRRHQIERNRVKALPDWPLMAVLVEHMEGQRDLITHKSVWHLSDEAMKNVYTFYIMFTVWGCCFFGSTKDPYYDSEQYRGDGGDGTGHWVYEKQEDIEEEARAELWRDELIEEIEQKVGSLRELEEAGKKEQLVK	At1g18730	XP_004252225.1	2	6	2	1.371	0.00884092	3	1	4	Cp	58	1	Cp	possibly Cp	Cp	Cp	40.9	thylakoid-integral	plastid	-
	Solyc09g083190	PNSB5 NDH18	Photosynthetic NDH subunit of subcomplex B 5, chloroplastic (NCBI)	MENSLTLSLLSTIPVPNSVFSTKWSVLFRGNPCSISSKIGTKCGGFRSSTRLYAGLTEIEPDINEDPVDRWRTNGIDIEDYVFGKYDNADHHTYFESEDKKVSFWGSIAEDYAAIAPPTGFQGIISWLFPPAIVAGMYFNVPGEYLYIGAAVFTIVFCIIEMDKPSEAHNFEPQIYNMERGARDKLISDYNTMDIWEFNEKYGDLWDFTVKKDDIMKR	At5g43750	XP_004247633.1	1	1	1	0.585	0.00377238	1	0	1	Cp	47	3	Cp	possibly Cp	Cp	PM	90.8	thylakoid-integral	plastid	plastid
NDH complex: Assembly & Stability	Solyc03g026210	CRR1	Dihydrodipicolite reductase-like protein CRR1	MAVLSCQTYFINSKKIIKTKPFICCSSSQNNNVKVIINGAAKEIGRAAVIAVTKARGMELAGAVDSNFVGQDIGQVCDMEEPLEIPIINDLTMVLGSISQLKATGVVIDFTDPSTVYDNVKQATAFGMNSVVYVPRIKQETVMALSMLCDKASTGCLVAPTLSIGSILLQQAAISASFHYNNVEIVESRANPLDFPSQDAVQIANNLSNLGQLYNRDDISSDIPARGQVLGEDGVRVHSLVLPGLPSSTSVYFSRPGEVYTLKHDITDVQCLMPGLILAIRKVVRLKNLVYGLEKFL	At5g52100	XP_004234357.1	4	10	4	1.783	0.0114977	4	2	6	Cp	24	5	-	possibly Cp	Cp	Cp	98.6	plastid stroma	plastid	-
	Solyc07g007280	CRR6	Chlororespiratory reduction 6	MASTRPLHTLSSTLKQTIPSLVPLINISHKSNSISFTFSSSSSSSRQFATFVSFNPSGNFDLSLYDDQENIEVAPPPMPPSEGRYEVVIDNDIIQRLDLSPFQNATGISSPLSAKPKEFMERTIGFTINYKREDKYDPRELSEFPDIRLWFVRLDATYPWLPILLDWRAGELARYAAMLVPHQMSMKMGVVFNPEALELFVMNKVFVVYSWLKQNEIPMPRLKTKDMARMLGFGIGDELFDLIDKNQIDPS	At2g47910	P_004242717.1	7	39	7	6.197	0.0399615	5	3	8	Cp	52	2	Cp	Cp	Cp	Cp	61.2	plastid stroma	plastid	-
	Solyc02g066920	CRR7	Chlororespiratory reduction 7	MEAQLWCNKTYNCIGTETWRIQHPLQILHTSNWQQPIFQPFNSSISHSLTCRHIHRNGIKTFATRRRRSNIETDTYVLMEPGKSEEFVTEEELRDKLKSWLENWPAKTLPPDLARFEDSDDAVEYLVKSVCELEIDGDVGSLQWYQVRLQQDII	At5g39210	XP_004233386.1	2	8	2	0.778	0.00501695	5	0	5	Cp	89	5	-	none	not Cp	N	72.4	plastid stroma	nucleus	-
	Solyc10g005470	CRR9	Chlororespiratory reduction 9	MNMLKTCGENYHQLVPSFISSKYQNYVVEPLKFAYRKKQMQSLVVKANNGERRTFLTLEEAGLVEVSGLSTHERFLCRLTISSLNLLKVignaEQEGCSIEELGKICDWFLKDKLKREQNLDSAVLQWDESDFQL	At4g21445	XP_010327230.1	1	10	1	0.389	0.00250847	5	3	8	-	-	3	-	none	Cp	Cp	65.1	plastid stroma	plastid	plastid
	Solyc07g064100	CRR41	Chlororespiratory reduction 41	MASSSNILQLHHLHLLPSIHPISCVKQFTIKCTSPESSSDPEFLTPNSETTISPEKFPIEKRRKSEIIRERKSRTELIKQDPPNFEIGWKRTKPIPLDKPIGYVIMDFLEKLEELMARDFGSTALLAKVGEIVAERAREEAEVLKDEGKVEERMVTELYRVLKLMEMDLAMVSAAVKEETLNKRLEQAKARCRQAILVANSF	At1g51100	XP_010324328	4	15	4	3.642	0.0234855	5	3	8	Cp	31	4	-	none	Cp	N	88.2	plastid stroma	plastid	plastid
	Solyc03g062710	NDF5	NADH-Dependent cyclic electron flow 5	MATINTSLLSPNIILGSLISRSPSKSISAFPTPPLCSPLHYSCLTRNTQLPGVASISYPPVDMEYLESEFSGHGVTFTEVNESCVVRMALENGSIANLMLPSGLITSYKAQMWHGGTMELLHTTVSEGQNGSPVIEGGVSLACNCENDQGFSWSPSSWALHQVKGDPQGSIQVELICTSSDGKIEAKYMVTLQEDLLTSEIKIFNLGMASFRMTGSVLSHLTVSTPEASYAVGLQGSDFFSNPPFLANFSIVPPAFGKTKNQPSKKSFGEIFSSWGTKNQNPEKIAEKELEGEETDNYKHLTDEMSKIYRSAPRNFTLIDRGRRNSVVVGRDGFKEVYLLSPGSRHESYGRYSYICVGQAALLQPIIIESQSEWRGKQSLHNPNM	At1g55370	XP_004234805.1	2	3	2	0.468	0.00301791	3	0	3	Cp	61	1	Cp	Cp	Cp	Cp	99.7	thylakoid	-	-
NDH e- flow	Solyc12g042770	PIFI	Chloroplast post-illumination chlorophyll fluorescence increase protein (AHRD V1 **-- A1Y9I8_TOBAC)	MAAASTSPSLFPATRSASNTNTSPSVSNIYATSFMGAHLRTYYPATRKLVRIHRGIVAAAVATSPAEEIKEYVLPSWAKFDLGISPVYWKTMNGLPPTAGERLKLFYNPAASNMVPNEDFGIAFNGGFNQPIMCGGEPRIMLEKIRGKADPPIYTIQLCIPKHALSLIFSFTNGIEWDGPYRLQFQVPKAWRNKPTEFFTEGLTQELSQEGACDRAIFPDSSILITRCAMVGNLNVDGGDRCNLDLVPGCIDPDSPQYNPLANVDDGSCPPYSDSED	At3g15840	XP_004252315.2	3	17	3	0.995	0.00641628	5	3	8	Cp	57	1	Cp	Cp	Cp	Cp	100	plastid	plastid	-
PGR5: Cyclic e- flow	Solyc09g090570	PGR5	Proton gradient regulation 5 (AHRD V1 ***- B0F831_CUCSA)	MAITSSIATTSFSSCVSGEDYGKFMRKVQPLMNVKFGKAVRSRIMMGNVNDGKGLFAPIVVITRNIVGKKRFNQLRGKAIALHSQVITEFCKSIGADQKQRQGLIRLAKKNGEKLGFLA	At2g05620	XP_004247764.1	1	3	1	0.585	0.00377238	3	2	5	Cp	43	5	Cp	none	Cp	Cp	62.9	thylakoid-peripheral-stromal-side	plastid	plastid
	Solyc08g080050	PGRL1A	Proton gradient regulation 5 (PGR)-like protein 1A, chloroplastic	MATKLGFSITSSKLFHAPFKRPIFSASSSPRPPLIPFGVSRKLSIrRNAKLLVLSPKAAADQPGQVKEEEEEDTKILQYCSLDRKQKKSMGEMEQEFLQALQAFYYEGKAIMSNEEFDNLKEELMWEGSSVVMLSADEQRFLEASMAYVSGNPILTDKEFDKLKLKLKMDGSDIVVEGPRCSLRSRKVYSDLYVDYLKMFLLNVPAAVVALGLFFFLDDLTGFEITYLLELPEPFSFIFVWFAALPFILWLSFTFTNFIVKDFLILKGPCPNCGTDNTSFFGTILSVSSGGKTNKVKFVLrRNAWSMIQPHA	At4g22890	XP_004245668.1	2	2	2	0.468	0.00301791	2	1	3	Cp	55	2	Cp	Cp	Cp	Cp	91.6	thylakoid-integral	plastid	plastid
A Proteins were identified by acetone preparations and/or the gel method. For emPAI and Mol% calculations, only the data from the acetone prepartions were used. Proteins identified solely by the gel method have data for the number of peptides, PSMs and unique peptides.
B Names of tomato proteins were based on the literature, NCBI annotation (identified in BlastP searches), and/or SolyGenomics descriptor. In a small number of cases, tomato protein names were assigned based on NCBI annotations and the Arabidopsis homolog.
C Some Sol Genomics descriptors were updated when NCBI annotations and Arabidopsis gene annotations were aligned.
D Target P's subcellular locations are: chloroplast (Cp), mitochondria (M), secretory (S), and no predicted location is indicated by a dash (-).
E ChloroP was used to predict the presence of a chloroplast transit peptide (Y) and the lack of a predicted transit peptide is indicated with a dash (-).
F Predotar's predicted subcellular locations were: chloroplast/plastid (Cp),endoplasmic reticulum (ER) or mitochondrion (M). For proteins with localization predictions that were less clear, Predotar provided categorized of possibly Cp, M and ER. Proteins with unresolved locations or that did not have a homolog detected by Predotar are indicated with a dash (-).
G WoLF PSORT's and YLoc's predicted subcellular locations were: chloroplast/plastid (Cp), cytosol (C), cytoskeleton (Cy), endoplasmic reticulum (ER), extracellular (EX), golgi apparatus (G), mitochondrion (M), nucleus (N), peroxisomes (P), plasma membrance (PM), and vacuole (V). Proteins with no chloroplast location in WoLF PSORT are indicated by not Cp.The number of proteins predicted to be in t…

## Sheet: Table S5F-ATPSyn
Table S5F - ATP synthase complex and associated proteins.
	Gene and protein descriptors and accessions						ProteomicsA					Number of times detected			Algorithms								Databases
Category	Tomato Gene ID	Gene nameB	DescriptionC	Protein Sequence	Arabidopis homolog	Tomato protein NCBI accessionB	Peptides	PSMs	Unique Peptides	emPAI	Mol%	Acetone samples	Gel samples	Total	TargetP D ver.1	Transit peptide length	TargetP (reliability class)	ChloroP E	Predotar F	WoLF PSORT G	YLoc G	YLoc % Confidence	PPDB	SUBA4	plprot
ATP Synthase complex	544163598	ATPA	ATP synthase CF1 alpha subunit (chloroplast)	MVTIRADEISNIIRERIEQYNREVKIVNTGTVLQVGDGIARIHGLDEVMAGELVEFEEGTIGIALNLESNNVGVVLMGDGLLIQEGSSVKATGRIAQIPVSEAYLGRVVNALAKPIDGRGEISASEFRLIESAAPGIISrRNASVYEPLQTGLIAIDSMIPIGRGQRELIIGDRQTGKTAVATDTILNQQGQNVICVYVAIGQKASSVAQVVTTLQERGAMEYTIVVAETADSPATLQYLAPYTGAALAEYFMYRERHTLIIYDDLSKQAQAYRQMSLLLrRNAPPGREAYPGDVFYLHSRLLERAAKLSSSLGEGSMTALPIVETQSGDVSAYIPTNVISITDGQIFLSADLFNSGIRPAINVGISVSRVGSAAQIKAMKQVAGKLKLELAQFAELEA…	Atcg00120	YP_008563073.1	22	673	22	78.433	0.505777	5	3	8	-	-	-	-	-	-	-	-	thylakoid-peripheral-stromal-side	plastid	-
	544163620	ATPB	ATP synthase CF1 beta subunit (chloroplast)	MRINPTTSGSGVSTLEKKNPGRVVQIIGPVLDVAFPPGKMPNIYNALVVQGRDSVGQPINVACEVQQLLGNNRVRAVAMSATEGLTRGMAVIDTGAPISVPVGGATLGRIFNVLGEPVDNLGPVDTSTTSPIHRSAPAFIQLDTKLSIFETGIKVVDLLAPYrRNAGGKIGLFGGAGVGKTVLIMELINNIAKAHGGVSVFGGVGERTREGNDLYMEMKESGVINKENIAESKVALVYGQMNEPPGARMRVGLTALTMAEYFRDVNEQDVLLFIDNIFRFVQAGSEVSALLGRMPSAVGYQPTLSTEMGSLQERITSTKEGSITSIQAVYVPADDLTDPAPATTFAHLDATTVLSRGLAAKGIYPAVDPLDSTSTMLQPRIVGEEHYETAQRVKQTLQR…	Atcg00480	YP_008563095.1	30	1094	28	2153.43	13.8865	5	3	8	-	-	-	-	-	-	-	-	thylakoid-peripheral-stromal-side	plastid	-
	Solyc02g080540	ATPC	ATP synthase gamma chain (AHRD V1 ***- B7FIR4_MEDTR); contains Interpro domain(s) IPR000131 ATPase, F1 complex, gamma subunit	MSCSNLTMLVSSKPSLSESSALSFRSAVSSFQLPNHNLSGPSNPSRSSSVIPVRCGLRDLRDRIDSVKNTQKITEAMKLVAAAKVrRNAAQEAVVGARPFSETLVEVLYNINEQLQTDDIDVPLTKVRPVKKVALVVVTGDRGLCGGFNNYIIKKAEARIRDLKALGLDYTIISVGKKGNSYFLrRNAPYIPVDKFLEGSNLPTAKDAQAIADDVFSFFVSEEVDKVELLYTKFVSLVKSEPVIHTLLPLSPKGEICDINGNCVDAAEDEFFRLTTKEGKLTVERDVMRTKTTDFSAILQFEQDPVQILDALLPLYLNSQILRALQESLASELASRMSAMSSATDNASELKKNLSRVYNRQRQAKITGEILEIVAGADALV	At4g04640	XP_004232711.1	12	165	12	38.811	0.250273	5	3	8	Cp	75	1	Cp	Cp	Cp	Cp	98.8	thylakoid-peripheral-stromal-side	plastid	-
	Solyc12g056830	ATPD	ATP synthase delta subunit (AHRD V1 ***- Q7XYM8_BIG); contains Interpro domain(s) IPR000711 ATPase, F1 complex, OSCP/delta subunit	MAALQQTPITFQSRSPPPTQLINGTVAKLSYSGGLKLPKLTLKLRSKRTSrRNAGRGRGVLGAKMADSAAGSYANALADVAKSNETLEQTTADLEKIEKIFDDDAVYDFFVSPIVSEEKKRELVDEIVSSTGIQPHVANFLNILVDMKRVELIKDIVKEFEKVYNTLTDTELAVVTSVVKLESQHLAQIAKGVQRLTGAKNVRIKTVIDESLVAGFTIRYGNSGSKLIDMSVKKQLEDIAAQLEIGDIQLAV	At4g09650	XP_004252554.1	11	294	11	67.129	0.432883	5	3	8	Cp	63	3	Cp	Cp	Cp	Cp	99.4	thylakoid-peripheral-stromal-side	plastid	-
	544163619	ATPE	ATP synthase CF1 epsilon subunit (chloroplast)	MTLNLSVLTPNRIVWDSEVEEIVLSTNSGQIGILPNHAPIATAVDIGILRIRLNDQWLTMALMGGFARIGNNEITVLVNDAEKGSDINPQEAQQTLEIAEANVKKAEGrRNAQKIEANLALrRNAARTRVEASNPIS	Atcg00470	YP_008563094.1	4	79	4	99	0.638403	5	3	8	-	-	-	-	-	-	-	-	thylakoid-peripheral-stromal-side	plastid	-
	544163599	ATPF	ATP synthase CF0 subunit I (chloroplast)	MKNVTDSFVSLGHWPSAGSFGFNTDILATNPINLSVVLGVLIFFGKGVLSDLLDNRKQRILNTIRNSEELRGGAIEQLEKARSRLRKVETEAEQFRVNGYSEIEREKLNLINSTYKTLEQLENYKNETIQFEQQRAINQVRQRVFQQALRGALGTLNSCLNNELHLRTISANIGMLGTMKEITD	Atcg00130	YP_008563074.1	4	11	4	1.424	0.00918269	5	2	7	-	-	-	-	-	-	-	-	thylakoid-integral	plastid	-
	Solyc06g065990	ATPG	ATP synthase subunit b' (AHRD V1 ***- D8G4T7_9CYAN); contains Interpro domain(s) IPR002146 ATPase, F0 complex, subunit B/B', bacterial and chloroplast	MANMIMSSSKALITSSSSTIPSSPRFKLSLTQIPFPKLPLPRSPKSLETLSIPSTLKSISVILASSLAIAPPSLAEEIEKASLFDFNLTLPTMMAEFLFLMFALDKIYFSPLGKFMDERDSAIKEKLSSVKDTSTEVKQLEDQAAAIMKAARAEISAALNKMKKETQQEVEQKIAEGRKKVEAELLEALASLENQKEETMKSLDSQIAALSDEIVKKVLPASN	At4g32260	XP_004241780.1	6	35	1	7.254	0.0467776	5	3	8	Cp	74	1	Cp	Cp	Cp	Cp	99.9	thylakoid-integral	plastid	-
Assembly & Stability	Solyc05g014050	ALB4	ALBINO3-like protein 1 (Alb4), chloroplastic (NCBI)	MATFFPSLGPNSILSPFVDRTRTLNPVFQRTHFGNLPLNKPFSRGMLGVARFGLGQDPFPDPETAELFFKDLLTRTEGFLYTVADAAVSGSVDTVVDTTGSVKQNSDWLSGITNGMETVLKVLKDGLSTLHVPYSYGFAIILLTILVKAATFPLTKKQVESSLAIRSMAPQIKAIQERYAGDQERIQLETARLYKLAGVNPLAGCLPTLATIPIWIGLYRALSNVANEGLLTEGFFWIPSLAGPTTVAARQTGSGTSWLFPFVDGHPPLGWSDTFAYLVLPVLLVVSQYISIQIMQPSQQSDDPNVKNSQAITKFLPLMLGYFSLSVPSGLSLYWLTNNILSTGQQVWLQKLGGAKVPTLKLSDDTPKKEQPQIQKLVSEATIAKKKDANPTSDKPRQG…	At1g24490	XP_010320958.1	4	19	4	1.081	0.00697085	5	0	5	Cp	44	2	Cp	Cp	Cp	M	70.3	thylakoid-integral	plastid	-
	Solyc02g088350	BFA1	Uncharacterized proteins similar to BFA1	MATAPAIFVPSTSLASSNARKINLSSWNEKLVIPQNFPFWTPKYQSRKPPSCSGTNVTVVQGDRNTTELPMSIDALDSFIRLNLGNWTGSFHQFDGHGNLMHRITTKLAVGSYGEGELMSLLQTLYIKQPPSTTSCSGDDCESEWFEYKIKETNMFTVDKYQQIGFFPKEKAYALRYQTAGMLETVLRQGVLGEDDIGEESPRNLKLPSKRPSIVCENCLYSLEKDRRVRAFHIMDPKGVLEMLLVFLEERGNGEAIPPSFDDFKEDTERILPHLGTWKGHSRTTRTGVYGATITEASTTAVLEINKDGQLIQDITSTSGATNITTNVHWTGTISNNLVTFDGGFQLTLLPGGIYMGYPSDVAKNVQESTAFHVEFCWLESPGKRQRLIRTYDVEGFAV…	At3g29185	XP_004230904.1	5	16	5	1.276	0.00822831	5	3	8	Cp	51	2	Cp	Cp	Cp	Cp	96.2	plastid	plastid	-
	Solyc01g110160	BFA3	Uncharacterized proteins similar to BFA3	MATILSLNPLAIRRFSSNSQCYLHRTMRIGQAAIHFQKNYPVSFVGFLQFSKRRNFICAVSKDAEESFKKTVEVDRLIDTLREASDKELPQIVVENVLAFNESFWIRLAARADTCKSDDDKKDYEELALTVMNIVDRLVHKTNEKIEASTDVLKAILKPVIDEVEEISWPLRDPEAVSLMEKEINQREQEGQLDEGFLAEVNAQLRQATKDGDKPGLEAMLQKVLQLYASRVLSKRSYAKKGNEVLKAEQFLETIIKAPEEVWNKLLLDGMTLGKGDISPEELYAVIKKRMERTLIRTEGGSYQQRVLIEYLKGIESRAGEIVRVLQG	At2g21385	XP_004230904.1	13	51	13	5.449	0.035138	5	3	8	M	15	4	Cp	M	Cp	M	79.7	plastid stroma mitochondria	plastid	plastid
	Solyc02g093170	PAB	Protein in chloroplast ATPase biogenesis (PAB); Cyclin delta-3 (AHRD V1 **-- Q94JY0_ARATH)	MKLGGGVGFGCPRAVAFPGILFSRCRPTFRCYSSSSSPNADHVSFIKDVAATQAPEHLNELLKILQVRGEEIISPGAKQGLVPLVIPLSRRSSDSVTALLRWPTAPSGMEMPLVEVRKYGVWLLSKNVDQYIHRVLAEEDANGNQEKVDELFRISAGAGKKLYEKGDFGASKISNIDTYILKKVGLFPDVLERRIKQHFDNGDNISALVTGEFYTKKEHFPGFARPFVFNAEVLLKVGRNIEAKDAARGALKSPWWTLGCEYHEVANMAEWEDEQIEYIKEKVTEEGREADLKKGKQPAQVALDEAAFLLDLASIDGSWDDCAERIAECYKEAGLHEVANFVVYRD	At4g34090	XP_004231860.1	13	56	13	6.079	0.0392005	5	3	8	M	32	3	Cp	-	Cp	Cp	0.8863	plastid stroma	plastid	plastid
A Proteins were identified by acetone preparations and/or the gel method. For emPAI and Mol% calculations, only the data from the acetone prepartions were used. Proteins identified solely by the gel method have data for the number of peptides, PSMs and unique peptides.
B Names of tomato proteins were based on the literature, NCBI annotation (identified in BlastP searches), and/or SolyGenomics descriptor. In a small number of cases, tomato protein names were assigned based on NCBI annotations and the Arabidopsis homolog.
C Some Sol Genomics descriptors were updated when NCBI annotations and Arabidopsis gene annotations were aligned.
D Target P's subcellular locations are: chloroplast (Cp), mitochondria (M), secretory (S), and no predicted location is indicated by a dash (-).
E ChloroP was used to predict the presence of a chloroplast transit peptide (Y) and the lack of a predicted transit peptide is indicated with a dash (-).
F Predotar's predicted subcellular locations were: chloroplast/plastid (Cp),endoplasmic reticulum (ER) or mitochondrion (M). For proteins with localization predictions that were less clear, Predotar provided categorized of possibly Cp, M and ER. Proteins with unresolved locations or that did not have a homolog detected by Predotar are indicated with a dash (-).
G WoLF PSORT's and YLoc's predicted subcellular locations were: chloroplast/plastid (Cp), cytosol (C), cytoskeleton (Cy), endoplasmic reticulum (ER), extracellular (EX), golgi apparatus (G), mitochondrion (M), nucleus (N), peroxisomes (P), plasma membrance (PM), and vacuole (V). Proteins with no chloroplast location in WoLF PSORT are indicated by not Cp.The number of proteins predicted to be in t…
