# Supplementary material for: The tomato chloroplast stromal proteome compendium elucidated by leveraging a plastid protein-localization prediction Atlas
Source: Front Plant Sci. 2023 Aug 28;14:1020275. doi: 10.3389/fpls.2023.1020275 (PMC10493611; doi:10.3389/fpls.2023.1020275)
Supplement: Supplementary file 8 [file Table_6.xlsx]

## Sheet: TableS6A.Plastid org & division
Table S6A. Plastid organization and division
Gene and protein descriptors							ProteomicsA								Bin codes		Algorithms								Databases
Category	Tomato Gene ID	Gene nameB	DescriptionC	Protein Sequence	Arabidopis homolog	Tomato proteinB NCBI accession	Peptides	PSMs	Unique Peptides	emPAI	Mol%	Acetone samples	Gel samples	Total	Bincode	Name	TargetP D ver.1	Transit peptide length	TargetP (reliability class)	ChloroP E	Predotar F	WoLF PSORT G	YLoc G	YLoc % Confidence	PPDB	SUBA4	plprot
Cell division	Solyc01g007880	ARC3	Accumulation and replication of chloroplasts 3; MORN repeat protein (AHRD V1 *--- D4V7H0_BACVU); contains Interpro domain(s) IPR019746 Tubulin/FtsZ, N-terminal	MDLLLPIPARLSTFSRAAVCTFSPANPFNSNSFTCRKVRFRVSCCTKPVRVETNSNFNRRDGNNCEVNREDDDTGEAGGLKNVWEETEFVEVFGIGSRKDALLEFCLASPYLSPALRFWNVLVKDSEKVLLQEKVPIEDVSSRIVEVPSAINSCSKAVILVASAAYGTNADHVPALDIIRKLKSRNGLAVGIILKPFSFEGRRRYDEVTDLIDKLQKHATVCIVIDTDGLLKKDLLTLDEALKTSYNAVLMAVNAISILMSENADHIKLLDATDCGTKELSGPELIKILESYKEAKTGFGAGYNVETSILRAVYDCPFLGLGVKGSNGVVICIIASSGVVNSSDVRSILRTFRQTTGCNGDIVISIVQEANLEPNLIVTTVVTCGYATQEPSEKSSLFS…	At1g75010	XP_004228899.1	2	2	2	0.103	0.000664197	2	1	3	31.2.5	cell.division.plastid	Cp	50	2	Cp	Cp	Cp	PM	26.4	plastid stroma	-	-
	Solyc04g081070	ARC6	Hop-interacting protein THI044, ACCUMULATION AND REPLICATION OF CHLOROPLASTS 6, ARC6	MEALTHLSFGICTARLSPPYQLAGGVGKKPPRLNAVTGGASSVTGGTSSVPTNFSASKWADRLLADFQFLPSTTTTSDSSDFQNSTSTTSVTTIPPPVAPSDRHISMPIDFYRVLGAEAHFLGDGIrRNACYDARITKPPQYGYSQEALIGrRNAQILQAACETLADSTSrRNAEYNQGLAQHEFDTILTPVPWDKVPGALCVLQEAGETGVVLQIGESLLKERLPKSFKQDVVLAMALAYVNADHSRDAMALSPPDFVQGCELLERALKLLQEEGASNLALDLQSQIDETLEEINPRYVLELLAFPLGDEYRMKRVEALQGVRNILWAVGGGGAAAISGGFTREDFMNEAFLRMTAAEQVDLFVATPSNIPAESFEVYGVALALVAQAFVGKKPHLIQ…	At5g42480	NP_001265966.1	5	7	5	0.403	0.00259875	3	0	3	20.2.1	stress.abiotic	Cp	98	5	Cp	Cp	Cp	Cp	42.9	envelope-inner	plastid	-
	Solyc07g065050	FTZ1	Cell division protein ftsZ (AHRD V1 ***- B6TH29_MAIZE); contains Interpro domain(s) IPR000158 Cell division protein FtsZ, N-terminal	MAILGLSNPAELASSPSSSLAFSHRLHSSFIPKQCFFTGVRRKSFCRPQRFSISSSFTPMDSAKIKVVGVGGGGNNAVNRMIGSGLQGVDFYAINTDAQALVQSAAENPLQIGELLTRGLGTGGNPLLGEQAAEESKEAIANSLKGSDMVFITAGMGGGTGSGAAPVVAQIAKEAGYLTVGVVTYPFSFEGRKRSVQALEAIEKLQRNVDTLIVIPNDRLLDIADEQTPLQDAFLLADDVLRQGVQGISDIITIPGLVNVDFADVKAVMKDSGTAMLGVGVSSSKNRAEEAAEQATLAPLIGSSIQSATGVVYNITGGKDITLQEVNRVSQVVTSLADPSANIIFGAVVDERYNGEIHVTIIATGFTQSFQKTLLSDPRGAKLIEKGAGIKENMASPVT…	At5g55280	NP_001233950.1	10	46	8	5.105	0.0329197	5	3	8	31.2	cell.division	Cp	102	1	Cp	Cp	Cp	Cp	100	plastid stroma	plastid	-
	Solyc09g009430	FTZ2	Cell division protein ftsZ (AHRD V1 ***- B0BYG5_ACAM1); contains Interpro domain(s) IPR000158 Cell division protein FtsZ, N-terminal	MATCTSAVFMPPDTRRSRGVLTVLGGRVCPLKIQDEKIGYLGVNQKGTSSLPQFKCSANSQSVNQYQNKDPFLNLHPEISMLRGEGNNTMTTSRQESSSGNVSESLMDSSSSNNFNEAKIKVVGVGGGGSNAVNRMIESSMKGVEFWIVNTDIQAMRMSPVNPEYRLPIGQELTRGLGAGGNPDIGMNAANESKQAIEEAVYGSDMVFVTAGMGGGTGTGAAPIIAGTAKSMGILTVGIVTTPFSFEGRRRAVQAQEGIAALRENVDTLIVIPNDKLLTAVSPSTPVTEAFNLADDILRQGVRGISDIITIPGLVNVDFADVRAIMANAGSSLMGIGTATGKTRARDAALNAIQSPLLDIGIERATGIVWNITGGSDLTLFEVNAAAEVIYDLVDPSAN…	At3g52750	XP_010325922.1	10	109	5	7.733	0.0498664	5	3	8	31.2	cell.division	-	-	4	-	none	Cp	Cp	93.8	plastid stroma	plastid	-
	Solyc10g083490	FTZ2	Cell division protein ftsZ homolog (AHRD V1 ***- A0YTK0_LYNSP); contains Interpro domain(s) IPR000158 Cell division protein FtsZ, N-terminal	MASCTSAVFVPLDTRLRNGVLTVLARRVCPLKMQDEKVGYLSVNQKGISSCPQFKCSANSHRFNNYQSKDSFLNLHPEISMLQGEGNHTFTTSRQESSSGGVAESLMDSSSLKNFNEAKIKVVGVGGGGSNAVNRMIESSMNGVEFWIVNTDIQAIRMSPVFPENRLPIGQELTRGLGAGGNPDIGMNAAKESKEAIEEAVRGADMVFVTAGMGGGTGTGGAPIIAGIAKSMGILTVGIVTTPFSFEGRRRAVQAQEGIAALRENVDTLIVIPNDKLLTAVSLSTPVTEAFNLADDILRQGVRGISDIITIPGLVNVDFADVRAIMANAGSSLMGIGTATGKTRARDAALNAVQSPLLDIGIERATGIVWNITGGNDLTLFEVNAAAEVIYDLVDPSAN…	At3g52750	XP_004249449.1	10	93	5	9	0.0580367	5	3	8	31.2	cell.division	-	-	5	-	possibly Cp	Cp	Cp	66.2	plastid stroma	plastid	-
	Solyc03g007980	MIND	Septum site-determining protein MinD (AHRD V1 ***- D8FVX6_9CYAN); contains Interpro domain(s) IPR010223 Septum site-determining protein MinD	MLSLQPLNPKPSSLYSSTFTPPNSLSPKTLKPIPAFRPSRNFYPSIHSMLQYNRKPQLAGDTPRVVVITSGKGGVGKTTTTANIGLSLARLGFSVVAIDCDVGLRNLDLLLGLENRVNYTVVEVLNGDCRLDQALVRDKRWSNFELLCISKPRSKLPIGFGGKALVWLVDALKARDEGGPDFIIIDCPAGIDAGFITAITPANEAVLVTTPDITSLRDADRVTGLLECDGIRDIKMIVNRVRTDMIKGEDMMSVLDVQEMLGLPLLGVIPEDSEVIRSTNRGYPLVLNKPPALAGLAFEQAAWRLVEQDSMETVMMEEEPKKRGFFSFFGR	At5g24020	XP_010317508.1	3	10	3	0.638	0.00411415	5	3	8	31.2.5	cell.division.plastid	Cp	67	1	Cp	none	Cp	Cp	100	plastid stroma envelope-inner	plastid	-
	Solyc04g076300	MCSC-like3	Mechanosensitive ion channel protein 3, chloroplastic isoform X1 (NCBI)	MAVSVSLLLPRELGIHGKCGLSGQSKGKMSRSQTDSCSIFLSSHSMRQDPWSIYLLNTVHRPLFSHPSPTRCNVLLCRSLLKPGGGYESQVLETATLIWKRSLSTIHGSPLVLQLIPAIGVLVFAAWGLTPLMRFGRKLFLHESDSNWKQSSWHYVTASYLKPVLLWTGAILICRAIDPLVLPTVSSQAVKQRFLNFIRSLSTVMALAYCLSSLIQQTQKFLVETKDPADARNMGFEFAGKAIYTAVWVAAVSLFMELLGFSTQKWLTAGGLGTVLLTLAGREILTNFLSSIMIHATRPFVLNDWIQTKIQGYDVSGTVEHVGWWSPTVIRGDDREAIHIPNHKFSVNIVRNLTQRTHWRIKTHLAISHLDVNKINNIVADMRKVLSKHPMVEQQRLHR…	At1g58200	XP_010320208.2	1	1	1	0.064	0.000412705	1	0	1	31.2.5	cell.division.plastid	Cp	78	4	-	Cp	Cp	PM	77.9	envelope	plastid	-
	Solyc09g091970	SULA	Cell division inhbitor SULA	MDSASSPKESKMIVSVTGATGFVGKRLVQRLHADKHQIRVLTRSRSTAQSIFPVKEFPGIVIAEEPEWKNCIEGSTAVVNLAGTSISTRWSYEIKKDIKQSRIRVTSKVVELINNSKDDARPKVLISATAVGYYGTSETEVFDEKSPSGNDYLAEVCREWEASALKVNKDVRLALIRIGVVLGKDGGALAKMIPLFMMFAGGPLGSGKQWFSWIHLDDLVDLIYEALSNPSYKGVINGTAPNPVRLGEMCEQLGSTLGRPSWLPVPEIALKAVLGEGASVVLDGQKVVPTKAKELGFSFKYRYIKDALKAIMS	At2g21280	XP_004247861.1	7	20	7	1.738	0.0112075	5	3	8	31.2.5	cell.division.plastid	Cp	61	5	Cp	none	Cp	Cp	84.3	envelope-inner-peripheral-stromal-side	plastid	plastid
Chloroplast differentiation	Solyc08g081170	MURE	Hop interacting protein; UDP-N-acetylmuramoyl-L-alanyl-D-glutamate--2 6-diaminopimelate ligase (AHRD V1 *-** D7UXP7_LISGR); contains Interpro domain(s) IPR005761 UDP-N-acetylmuramoylalanyl-D-glutamate-2,6-diaminopimelate ligase	MPFTLLSPPPFPSLLHHTLPPLQFKPFISLHHLRLKHPTTLTTVSAIGADGKYYPTPSDDDPPEAPEDSMHGVNKFQQIQRQAAKARKQQEELFKKEQSIFVNALADVEDAPDNPLVHDSDSGDDLFGEIDKAIALKRKDFVKQGLLKPNPKKSALVEVEVEGIDELLPEEVVDLEEISELTGLTEISEGEESEEDRSDFEVSDDVVKAEFSDLSSFDIDFDEYGKAKPRIAEPKFRMSLAELLDESRVVPVSVYGDLEVEISGIQHDSRLVESGDLFVCCVGMKTDGHLYLSEADKRGAVAVVASKEIDIEETLGCKALVIVEDTNAVLAVLAASFYRHPSKSMSVignaVTGTNGKTTTSYLIKAMYGAMGLRTGMLSTVGYYIYGDNKLESPHTTP…	At1g63680	XP_010325293.1	2	5	2	0.172	0.00110915	5	2	7	33.99	development.unspecified	M	82	5	-	Cp	Cp	PM	39	plastid nucleoid	plastid	-
	Solyc01g108200	SCO2	protein disulfide-isomerase SCO2 (SNOWY COTYLEDON)	MLPLINSCSIFTPLSSSLLPPRRSTVISCQAAADPSAAGGPSSFRWWFNFGAAASAAAAPGFGRNSQNSDEVADNGIGNNIKKKKTKVNAKERRWSRNRESYLADDGDALPLPMTYPDTSPCSPEEIDRRLQCDPIIEDCKQVVYEWTGKCRSCQGTGLVSYYNKKGKETICKCIPCAGIGYVQKITLRTDIDVMVDLDDKPP	At3g19220	XP_010315236.1	1	3	1	0.931	0.00600357	3	0	3	35.2	not assigned.unknown	Cp	28	2	Cp	Cp	Cp	Cp	94.6	thylakoid	-	-
	Solyc09g009290	STT1	Sorting of cpTAT substrates to thylakoid membranes; Ankyrin repeat protein (AHRD V1 **-- B4F7X1_MAIZE); contains Interpro domain(s) IPR002110 Ankyrin	MEKIMVLQCNSSSLFTQLWPMTVTATAYTCRFSCSNVVSHRFTRRINMGFRSFQEISTRNSVVNLRKAHFWEDPDDGSDSEEEEEEEEEREEDMDVESSFEYEENRAMDNSTNGLSNREDEFVKEVEQLLSPEEREILYHNQTPELDKISTEKWNPLHTFALAGQIRFMDRLLEEGLDIDAVDKEGQTALHHAVFGKKEAVISHLLRKGANPQVRDTDGVTPLHYAVQVGALQTVKMLIKYKVDVNAADNVGWTPLHVAMQSRNRDIAKVLLVNGADKYRKNKDGKTPLDISLCYGKDFKSYDLAKLLKLVNANREL	At5g40160	XP_004246551.1	1	2	1	0.145	0.000935035	2	0	2	31.1	cell.organisation	Cp	33	4	Cp	Cp	Cp	C	90.2	plastid stroma	plastid	-
	Solyc01g008160	SG1	Slow green1; Tetratricopeptide repeat-containing protein (AHRD V1 ***- D7L8H9_ARALY); contains Interpro domain(s) IPR011990 Tetratricopeptide-like helical	MNSTLTIGSSSFFHHSTTFPNSPSRSSIFTIPKTAHKSYSRRFVLQASVNGNSKSNPLISTLKSAGVAVVFAAVALGKFPVGTSLARAETPPAAVMEEQQQQEEEEGSPLTQFLESSPEAIEALKNLLQEKLESGEDEESLKILKKLSSAQPENTEWKFLTARLLNEMGKLEDAREVFEEILSKTPLSFEALFENALLMDRCGEGVKVIQRLEEALRLAEEESKVKESRDIRFIMAQVQFLQKNVEEALRSYDELEKEDPKDFRPYFCRGMIYSLLDRNKEAREQFAKYRELSPKKFEVEGYLRTALSRMKLFGTDEKES	At3g18420	XP_004228536	6	13	6	1.404	0.00905372	5	1	6	35.1.27	not assigned.no ontology.tetratricopeptide repeat (TPR)	Cp	87	2	Cp	Cp	Cp	Cp	98.4	envelope	plastid	plastid
	Solyc01g108070	DJ-1C	DJ-1 HOMOLOG C	MWSAPRIDPITTTAASAPPKKVLVPIGFGTEEMEAVILADVLRRAGAEVTVASVEKQLEVEAYGGTRLVADTFISACSTEIFDLVALPGGMPGSARLRDCEVLQKITSRQAEEKRLYGAICAAPAVALLPWGLLKRKQTTCHPAFIDKISSFRAVKTNTQVSGELTTSRGPGTSFEFAICLVEQLFGEPVAREIGELLLMNPAGDDPKRQEFNEVGWSLDRTPQVLIPIANGSEEIEVVTLIDILRRAKVNVVVASVEKSAQVLASSGTKIVADKLINATSDSIFDLIILPGGTAAAERLHKSKILKKLLKEQESAGRIFGAICSSPAVLQKQGLIKDKKATAHPAVLDKLKDGVNDAQVVIDGKLITSQGLATAIQFALAIVSKLFGHARARSVAEGL…	AT4G34020	XP_004230776.1	1	1	1	0.145	0.000935035	1	0	1	'35.1'	'not assigned.annotated'	-	na	3	-	possibly Cp	Cp	P	52.6	plastid	plastid	-
PlastoglobulesA	Solyc02g081170	FBN1	Plastid-lipid-associated protein, chloroplastic (AHRD V1 **-- PAP_CITUN); contains Interpro domain(s) IPR006843 PAP fibrillin	MASISSLNQIPCRTLQITSQYSKPTSKISTLPISSTNFPSKTELHRAISVKEFTYPKPKFTAQATNYDKEDEWGPEVEKISPGGVAVVDEEPPKEPSEIELLKKQLADSFYGTNRGLSASSETRAEIVELITQLESKNPNPAPTEALTLLNGKWILAYTSFSGLFPLLSRGNLLLVRVEEISQTIDSESFTVQNSVVFAGPLATTSISTNAKFEVRSPKRVQIKFEEGIIGTPQLTDSIVLPENVEFLGQKIDLSPFKGLITSVQDTASSVAKSISSQPPIKFPISNNNAQSWLLTTYLDDELRISRGDAGSVFVLIKEGSPLLKP	At4g04020	NP_001234183.1 Laizet et al (2006)	11	100	11	4.456	0.0287346	5	3	8	31.1	cell.organisation	Cp	46	2	Cp	Cp	Cp	Cp	100	plastoglobules	plastid	plastid
	Solyc08g005220	FBN2A	Plastid lipid-associated protein 3, chloroplastic (AHRD V1 **-- PAP3_BRACM); contains Interpro domain(s) IPR006843 PAP fibrillin	MSILPLHSLIFNVNTTVKSYCYTSFLPSSSISSYRFRKLSEFSTHSSFDDSRELFVPKTKQNDDDSDDKPFSFVDEWGERSKPELRPTTKLSESDPPIDVDEWgranaELGINNFSGIEDEWGEKSFPELRPEKTVSDSDPPIDEDEWIGAKLTGNNFIDRVSNQGVSEPESTEEDGWDEAEVVGRINAGVEEDERVAEMKRCLIDTVYGTDFGLRASSEVRAEALELVAKLEAANPTPTTVELLDGNWILVFTAFSELLPLLAVGTIPLLKVEKISQTISTSSLTIENSTTLSSPVATSSFSATAIFEVQSSSRIQVEIKEGTFKPPEIKSKIDLPENMDIFGQNISLSPLQQSLGPLENVVAGIARTISGLPPLKVPIPGERTKSWLITTYVDSDLR…	At2g35490	XP_004244405.1 Laizet et al (2006)	9	30	8	1.976	0.0127423	5	3	8	31.1	cell.organisation	Cp	27	4	Cp	Cp	Cp	Cp	96.5	plastoglobules	plastid	plastid
	Solyc08g076480	FBN2B	Fibrillin 2; Plastid lipid-associated protein 3, chloroplastic (AHRD V1 **-- PAP3_BRACM); contains Interpro domain(s) IPR006843 PAP fibrillin	MSTLYNPLIFTIKNPKGSLKPHTSLPSSVPTFRLRKFQNFSVQSSISSSNEPEKPTSITPDNDKADDKMVEFVDEWGEKSEPEPGPVTKLADSDPPEYDDEWGNGSPGVDVSGEEDEKLLELKRCLVDTVYGTDFGFRASSEIRAEALEFVCQLEAANPSPAPTESPELLDGNWILVFTAFSELLPLLAVGNIPLLKVEKISQDVNTNSSTIENATTLSSPVATLSFSATATFEVRSPSRIQVEFKEGNFKPPEIKSNINLPETVDLFGQKISLSPVQQSLGPLENAVAGIARTISGQPPLKIPIPGGRTKSWLLTTYLDKDMRISRGDGGLFVLVKEGSSLLY	At2g35490	XP_004245973.1 Laizet et al (2006)	8	77	7	9	0.0580367	5	3	8	31.1	cell.organisation	Cp	47	2	Cp	none	Cp	Cp	99.9	plastoglobules	plastid	plastid
	Solyc09g090330	FBN4	Fibrillin 4; Harpin binding protein 1 (AHRD V1 **-- Q5QJB4_SOLLC); contains Interpro domain(s) IPR006843 PAP fibrillin	MASLLHSRLPLSHNHSLSNSCQSFPCHLPGRSKRSTQRLLEERSYDSKRSLVCQSGIDEVTFIEPPGSKEAEAELIGSLKLKLLSAVSGLNRGLAASEDDLKKADEAAKELESCAGAVDLAADLDKLQGRWKLIYSSAFSSRTLGGSRPGPPTGRLLPITLGQVFQRIDVLSKDFDNIVELELGAPWPFPPVEATATLAHKFELIGSSTIKIIFEKTTVKTTGNLSQLPPLEVPRIPDQFRPPSNTGSGEFEVTYIDSDTRVTRGDRGELRVFVIS	At3g23400	NP_001234460.1	10	112	10	11.115	0.0716753	5	3	8	31.1	cell.organisation	Cp	53	4	Cp	Cp	Cp	M	43.8	plastoglobules	plastid	plastid
	Solyc03g062790	FBN7A	probable plastid-lipid-associated protein 13	MATSLQNLVPPFSCRRTTYTSPCTPIAIFRGGRRRNARKMLRVCRAMVEKTVQGASSTFAKEMERLSAKESLLLAFKDAGGFEALVTGKTTDVQCIDVNERIISLEKLNPTPRPSTSPNLEGRWNFEWFGAGSPVLLLAKIFFGRIPPTLANLSKLDVLIKDGCGTATAQVKILNSIENKFIISTKYSVEGPLRMKEEYVEGEFESPKVDEEAVPEQLRGAFGQAFNTLQQLPVPIRDAVSSGMKVSLSGTFQRLILISYLDDEILIIRNTAGEPEVLTRLEAGPDPQNITEYES	At2g42130	XP_004234807.1	15	101	15	6.406	0.0413092	5	3	8	35.2	not assigned.unknown	Cp	45	2	Cp	Cp	Cp	Cp	48.1	plastoglobules	plastid	plastid
	Solyc10g080490	FBN7B	probable plastid-lipid-associated protein 13, Fibrillin 7b	MAMLIQNLAPPFACRRSLYTSSFLLPITIFPGKYRNVRKKLRVCRAMTEQTPAEGPSSPFVKEIQRLSAKESLLLALKDAGGFEAVITGKTKDAQRIDVNERIIALERLNPTPRPTTSPFLEGLWNFEWFGTANPVFLATRLLFGRVPSTLANLSKLDLLIRNGYGTAIAHVKLLNTIENKFVLSSKFSVEGAFRMKEEYVEGIFETPKVDEDIVPEQLKGALDQAVNTLQQLPVPIRNTVSRGLKIPLGEAFQRLIIISYLDEEILIARNTAGEPEILTRLDPVLDPEPLSDYES	At2g42130	XP_004249284.1	11	40	11	2.981	0.019223	5	3	8	35.2	not assigned.unknown	M	25	5	Cp	Cp	Cp	M	92.3	plastoglobules	plastid	plastid
	Solyc08g068590	FBN8	PAP fibrillin family protein (AHRD V1 ***- B5W0K3_SPIMA); contains Interpro domain(s) IPR006843 PAP fibrillin	MISGFGSAVCVRPVVSFSNTIRRVHNHGRVTCLATSMSSASMTVARDAEYELENRKYELLNIIQDTQRGLVTTADQRSTIEEAMVVVEGFDAGKEIDLSKLDGTWRLQYTSAPDVLILFESAARLPFFQVGQIFQKFECQNESRGGLVRNVIKWSVPRLLEENEGATLIVTARFSSVSARNIYLKFEEIGLQNINISDDLQAVIAPAILPRSFLSLQILQFIRSFKARVPVTSPERHSVGGLYYLSYLDKNMLLGRAVGGGGVFIFTRAHTLIC	At2g46910	XP_004245278.1 Laizet et al (2006)	7	36	7	2.36	0.0152185	5	3	8	31.1	cell.organisation	Cp	39	3	Cp	possibly Cp	Cp	Cp	98.7	plastoglobules	plastid	-
	Solyc09g061440	PG18	Plastoglobular protein 18	MNRNISSIKLITNLQHMSRAASTCKKKKNPIELSVKSIRSEIENMSGVFTISSLYAPAPAHTHRLQPNCIIPPWNSSFPITNRSGNVAPLNFTCNFSSNPPPGENESKNVLDAFFLGKALAEAVTERIESTVGEFLSTVGRLQSEQQKQVQDFQEEILERAKQAKEKAARETMETQGLISNSYEADTSTATAASASGSVASPPLTNINSQPAKDSEIGISNGD	At4g13200	XP_004247093.2 Espinoza-Corral et al (2019)	4	29	4	2.981	0.019223	5	3	8	35.2	not assigned.unknown	Cp	23	3	-	none	Cp	N	74	plastoglobules	plastid	plastid
	Solyc08g074560	ABC1K1	ABC1-like protein kinase 1	MEGICTSCLYSSITPLSIEYRNRRKLLNTVRKNRSLSTRICAASSVSTVQTPSEKTALLVKDISRTSALEQLDIERGVCIPFRKYSPESVRNKVLESRGQIFSLVGRGIEIVWSLGLYWTTLVYDYLVGRDEEVVPFRARQLRKLLCDLGPSFIKAGQVLANRPDIIREDYMNELCILQDDVPAFPNQVAFNIIEEELGQPLEAVFSKISSETIAAASLGQVYRATLRASGEEVAIKVLRPQIEPIIYRDLFLFRTLASFLNGISLQKLGCELIVDEFGEKLLEELDYTLEARNIEDFLENFKDDPTVKIPRVYRQLSGSRVLVMEWIDGIRCTDPQAIRDEGIDIDGFLTVGVSAALRQLLEFGLFHGNDPHPGNIFAMRDGRIAYVDFGNVAVLSQQ…	At4g31390	NP_001305094.1	1	1	1	0.061	0.00039336	1	2	3	34.16	transport.ABC transporters and multidrug resistance systems	Cp	41	2	Cp	Cp	Cp	C	57.8	plastoglobules	plastid	-
	Solyc04g083010	ABC1K3	ABC1-like kinase 3	MSSSVASFTANHHVMLPSCADAVRLSGANSSGGRRVKLRLNLPRAAQVEARPQLVPAIRDVAGNSNVTGRTLQVGPSSRDRADDMQSEARAMTRAVDASVYSPDMLSSKYGTRPIKVLRRALQIFNGLGSFALKVWLDQLNGELDRKMRLRAIELRQTFTRLGPTFVKIGQGLSTRPDLCPPEYLEELSELQDALPTFPDAQAFSCIERELGRPLETIYSSISPSPIAAASLGQVYKAQLKYSGQVVAVKVQRPGIEEAIGLDFYLIRGVGILINKYVDIISSDIVALIDEFARRVYQELNYVQEGQNARRFKKLYADKEDVLVPDIFWDYTSGKVLTMEWVEGVKLNEQEAIERQGLKVLDLVNTGIQCSLRQLLEYGYFHANDPHPGNLLATPEGKL…	At1g79600	NP_001311447.1	2	3	2	0.16	0.00103176	3	0	3	34.16	transport.ABC transporters and multidrug resistance systems	Cp	44	2	-	possibly Cp	Cp	Cp	99.5	plastoglobules	plastid	-
	Solyc03g043750	NDC1	Alternative NAD(P)H-ubiquinone oxidoreductase C1, chloroplastic/mitochondrial	MNQLLPPLHQKNPIASMEFTLASSASAKTALLSCRQMGLGSPKLPNVWRRSSWRSRSSRRNTSLRTVAMSTTAGLVNNMEAPEANAQNVNYMWPDKKRPRICIIGGGFGGLYTALRLESLVWPDDKKPQVVLIDQSERFVFKPLLYELLSGEVEAWEIAPQFSDLLANTGVRFFKDRVKCLYPCNADHLGTNAPTAGTVHLESGLLIEYDWLVLAIGAEAKLDIVPGAADYALPFYTLEDAHRVDKKLRELERKNFGKDSAIRVAVVGCGYGGVELAATISERLQQKGIVQAINVDKTILSNAPAGNREAALKVLSSRKVQLILGYFVRCITKGNEPQTDAEPGSIDSAANADHSESVTLELQPAERGLQGQTIRADIVLWTIGSKPLLPQLEPSDKPY…	At5g08740	XP_004234639.1	6	17	6	1.069	0.00689347	5	2	7	9.2.1.3	mitochondrial electron transport / ATP synthesis.NADH-NADH.type II.mitochondrial	Cp	67	2	Cp	none	Cp	C	40.9	plastoglobules mitochondria	mitochondrion,plastid	-
	Solyc03g005000	-	Peptidase M48 Ste24p (AHRD V1 ***- B6TA12_MAIZE); contains Interpro domain(s) IPR001915 Peptidase M48, Ste24p	MASLCFSPSVLSCKIKPPITGFRKQRLSLFVCRAASLPFRDLDADDFRHPLDRQNTLLLRAIPGLKDIGKALLGTVSEQIMLLENIGTSVLVSEDQLPELHYLMVEASRILNIEAPDLYIRQSPVPNAYTLAVSGKKPFVVVHTSLVELLSRNELQAVLAHELGHLKCNADHGVWLTFANVLTLGAYTVPGVGSLIAQRLEEQLLRWLRAAELTCDRAALLVAQDPKVVVSVLMKLAGGCPSLSDQLNVDAFLEQARSYDKASSSPVGWYIRNAQTRQLSHPLPVLRAREIDEWSRSQEYRSLLQRAIQVNPVQKV	At3g27110	XP_004233997.1	3	6	3	0.438	0.00282445	3	2	5	29.5	protein.degradation	Cp	33	3	Cp	Cp	Cp	G	45.9	plastoglobules	plastid	-
	Solyc03g019880	-	UPF0426 protein At1g28150, chloroplastic (AHRD V1 ***- Y1815_ARATH)	MSMVLNCVAASPSCATRKWKPAVLGKQLPSGTSPFSVSAKTYGKFRVNAFFFNPIQEPILKEALKEPVAFAGGMFAGLLRLDLNDDPLKEWVSRTVEASGVTAKEIEAGDDQAEDTPQQIEIE	At1g28150	XP_004234323.1	2	15	2	2.728	0.0175916	4	2	6	35.2	not assigned.unknown	Cp	68	4	Cp	possibly Cp	Cp	Cp	82.7	plastoglobules	plastid	-
Thylakoids	Solyc02g088610	CLPB3	ATP-dependent chaperone ClpB (AHRD V1 **** B5W0X8_SPIMA); contains Interpro domain(s) IPR017730 Chaperonin ClpB	MSTVTSFSGVQFCVPSSSSNSSNRVALFSSHSAPYLNFSGKSRVLGKCSSLKLKRKDVFFSRKTEKLSQGSRLTVRCDASNGRITQQDFTEMAWQAIVASPEIAKENKHQIVEtheLMKALLEQKNGLARRIFSKTGVDNTRLLEATDKFIRQQPKVignaETAGSMLGRELEGLMQRAREYKKEYGDSFVSVEHLVLGFIQDKRFGKQLFNDFQISLKTLKTAIESIRGRQNVIDQDPEGKYESLEKYGKDLTAMARAGKLDPVignaRDDEIRRCIQILSRRTKNNPVLIGEPGVGKTAISEGLAQRIVQGDVPQALMNRRLISLDMGALIAGAKYRGEFEDRLKAVLKEVTESEGQIILFIDEIHTVVGAGATNGAMDAGNLLKPMLGRGELRCIG…	At5g15450	NP_001234143.2	45	214	43	17.166	0.110695	5	3	8	20.2.1	stress.abiotic	Cp	76	1	Cp	Cp	Cp	Cp	97.9	plastid stroma	plastid	plastid
	Solyc10g011770	CURT1A	Curvature thylakoid 1A	MASIAAASTSMASTAVFTTHLSLCSTAKAASFCCSALPYLPPRVSASAISTSFKFSESKRSSLHQVKASSSEETSVDTSEFITELKEKWDAVEDKTTVLLYGGGAIVAVWISSILVGAINSVPLLPKVLELVGLGYTGWFVYRYLLFKSSRKELAEDIEELKKKVAGSE	At4g01150	XP_004248070.1	3	8	3	2.162	0.0139417	3	2	5	35.2	not assigned.unknown	_	67	3	-	Cp	Cp	Cp	99.9	thylakoid-integral	plastid	plastid
	Solyc01g095430	CURT1A	Curvature thylakoid 1A	MAAAAAASTSMAATAVFASPFPLSSTTKAAPARCSALPYLPSRLSAIAFPSSLKIAEPKRSSLLQVKASSSEESGAVDTSELLTDLKEKWDALDNKSTVIVYGGGAIVAVWLSSIVVSAINSVPLLPKIMELVGLGYSGWFVYRYLLFKSSRKELAEDIEQLKKKIAGTE	At4g01150	XP_004229969.1	2	5	2	2.162	0.0139417	4	3	7	35.2	not assigned.unknown	Cp	67	1	Cp	Cp	Cp	Cp	99.8	thylakoid-integral	plastid	plastid
	Solyc10g005050	CURT1B pTAC8	Curvature thylakoid 1B, chloroplastic	MASTTTPSLSLSSSSTLVDGKTTRQSAAVASSQCVTLPTLPPRPAVQSRAARTTAYCRKIARNVAAMATSTGEVATADATAETATTELPSELVQKIQEVWDKVDDKYAVSSLGVAAFILLWSSTGVISAIDRLPLIPGVLELVGIGYTGWFAYKNLIFKPDREALIAKIKELYKDILGSS	At2g46820	XP_004248418.1	2	2	2	1.512	0.00975016	2	0	2	1.1.2.2	PS.light reactions	Cp	65	1	Cp	Cp	Cp	Cp	99.8	thylakoid	plastid	plastid
	Solyc06g066620	CURT1C	Curvature thylakoid 1C; Thylakoid membrane	MASIVVAKLHPPPPAITGRQTLFGTVNTSTLFVPTTRQGHLAITAKATSESSESLSSPSVVKSVKNIWDNPEDRIAVignaLGIAAIVGFWAASNFVAAIDSLPLIPGVFEFIGILFSTWFVYRYLLFKPNRQELFQGINKSISDILGQ	At1g52220	XP_004241735.1	1	3	1	0.292	0.00188297	3	1	4	35.2	not assigned.unknown	Cp	44	4	Cp	Cp	Cp	Cp	87.5	thylakoid	plastid	plastid
	Solyc11g010480	CURT1D	Curvature thylakoid 1D; CAAD protein superfamily	MELCVPQTFSNLPNYRISNRAQLQWRPSLLLKKPSKSRFNSGSFYRKGSAVRTKAETEAYELYVPPTVEEKDDESVRSKAETEAYELYVPPPTVEEKDDGAVRSKSEEEAYELYVPATVEEKDDGAVRSKSEEEAYELYVPTTVEEKDDGAVKNGAPVEDSMTDKDTDAYASLISEPPKVEEKDDGAVQNGAPIEDSSKDKETDAYASLIYEPPKVEEKDDGAVQNEAPIEDSSKDKETDAYASLIYEPPKVEEKDDGAIQNGAPIEDSSKDKETDSSADFIYEPPKVEEKDDGAVQAEAPIEDSGNDKETDAYAALIYESPKVEEKDDGVIQDEAPIEDTREDKETDSYASLTYEPPTVEEKDDATIQNEAPIDYSSKDKETDAYVSLTYEPPKEDSA…	At4g38100	XP_004250138.1	13	26	13	2.631	0.0169661	5	2	7	29.5	protein.degradation	Cp	54	2	Cp	Cp	Cp	N	77.6	thylakoid	plastid	-
	Solyc01g097860	FLAP1	Fluctuating light acclimation protein 1	MAAAPFLLESNLKWNPLFYTPNPIQCTRLIHYQKLTPSKFSKTSKLTVKCFSKNHKNVCFNDGNGLEVKNKENPFEIVVKSVMKALKALQKPAVAAVLVGLLLMAVCLLLLEKLVCSSYRSLQKDLNRIAEVADTSTPEGLSFVLTETTLALLRHPGYCISAYSSVDVKRSMEEGENRFNQLSIEERGKFDEETLVNVNNIRRKSSTSQRATGFSNEYIVVTILVAAEGAYKLPTINGSGDLKEALQKIASIPSSRTLAVEILWTPQNENDTLSERQLLEDYPLLRPL	At1g54520	XP_004230121.1	1	1	1	0.179	0.00115428	1	1	2	35.2	not assigned.unknown	-	-	5	-	Cp	Cp	PM	94.3	plastid	plastid	plastid
	Solyc10g006370	GDC1	Grana deficient chloroplast 1 (At1g50900); Ankyrin-repeat family protein	MASIPCTLHLTFSSSRPNFFSSCSVRLNSCFMGFSKLKSIGWCRPNGLGPNCGSRTTCWFNFRQNAETAGVYGSQSRDDFDRDDVEQYFNYMGMLAVEGTYDKMEALLSQNIHPVDILLLMASSEGDLPKIEELLRAGADYTVKDADGRTALDRAANDEVKDFIVNYKAQKA	At1g50900	NP_001334137.1	3	26	3	4.623	0.0298115	5	3	8	35.2	not assigned.unknown	Cp	63	1	Cp	Cp	Cp	Cp	98.7	plastid stroma; envelope-inner	plastid	plastid
	Solyc09g065160	FZL	Probable transmembrane GTPase FZO-like (FZL), chloroplastic isoform X1 [NCBI] dynamin family protein (AHRD V1 *--- D0MDN4_RHOM4); contains Interpro domain(s) IPR001401 dynamin, GTPase region	MVSLQTIYSSVRSPPCPLFIHPrRNARQCFHFRSrRNANCANSSVYSPVDNVKLVINNVNRPEQTPRTLFPGGFKRPEIKVPGLVLKVSCEDVLRDETVVNEIDQAISGRVDVVVLSGGGASGGKLYEAACLLKSIIKGMAYLLIDGRVDIAAAVNASGVLLSDQDLPAIVARNTMMDSKSEDLVVLPLVARIVQTPAAAVDASNSEGADFLIYEVGVNSKPEELVISVFERVKIPVFVMIGSLGDRKLFNEASNLLESGASGLVISMEDLRSVSDDDFGKLFYSPSALKKKSEEKSQSNSQLNSDLGNGFPGRKGVAGFIDLRDREEKLLENERLVLCDAINVIEKAAPMMEEISLLKDAVSQLDEPFLLVIVGEFNSGKSTFINALLGKKYLKDGVV…	At1g03160	XP_004247163.1	17	44	17	2.162	0.0139417	5	3	8	30.5	signalling.G-proteins	Cp	38	2	Cp	Cp	Cp	Cp	59	thylakoid-integral envelope-inner-integral	plastid	-
	Solyc05g009930	CHUP1	Chloroplastic; chloroplast unusual positioning 1	MIVRVGFLVAASIAAYAVKQINVKPSKPSLENGEPLLEQRGDEGDEKEQLLYSTDGLKEVVDEEEEKEEVKLINGIINPAQGNQIDLDDDLFPEFEDLLSGEIEFPLPSDKYDTGREERERVYQTEMAYNELERLRNLVKELEEREVKLEGELLEYYGLKEQESDVLELQKQLKIKAVEIDMLNITINTLQAEKQKLQEEVFHGTTARKDLEAARSKIKELQRQMQLEANQTKAQLLLLKQHVTELQEKEEEAFKRDSEVDKKLKLVKELEVEVMELKRKNKELQHEKRELVIKLDAAESKIAKLSNMTENEMVAQVREEVTNLKHTNDDLLKQVEGLQMNRFSEVEELVYLRWVCLRFELRNYQTPQGKVSARDLSKSLSPKSQHKAKQLMLEYAGSE…	At3g25690	XP_010320785.1	2	4	2	0.093	0.000599712	4	0	4	35.1.41	not assigned.no ontology.hydroxyproline rich proteins	S	-	2	-	ER	Cp	N	54.26	envelope-outer	plastid	-
	Solyc11g008990	pTAC4 VIPP1	Plastid transcriptionally active 4 (At1g65260); Membrane-associated protein VIPP1, chloroplastic	MAVRTPITGITMSSAPSISSCNRVVVVKVMPFRASFFGQGVGAVKLAGLQLTHSYRSRCNSHGGGALGARMNLFDRFARVVKSYANALISTFEDPEKILEQTVLEMNNDLIKLRQATAQVLASQKQLENKYKAAQQASEDWYrRNAAQLALGKGDEDLAREALKRKKSYADNANALKTQLDQQKAVVDNLVSNTRLLESKIQEAKSKKDTLKARAQSAKTATKVSEMLGNVNTSSALSAFERMEEKVLTMESQADALNQLTSDELEGKFALLETSSVDDDLASLKKELSGSAKKGDLPPGRTPVTRSSSPLQFQDSEIEKELNELrRNARANDF	At1g65260	XP_004250100.1	4	8	4	0.833	0.00537162	4	1	5	27.3.99	RNA.regulation of transcription	Cp	58	2	Cp	Cp	Cp	Cp	55.3	thylakoid-peripheral-stromal-side plastid stroma envelope-intermembranespace	plastid	plastid
	Solyc07g054820	THF1 PSB29	Thylakoid formation1, chloroplastic (AHRD V1 ***- A0YRG1_LYNSP)	MAAVTSVSFSAITQSAERKSSVSSSRSIDTFRFRSNFSFDSVNVRSSNSTSRFVVHCTSSSAADLPTVADTKMKFLTAYKRPIPTVYNTVLQELIVQQHLTRYKKSYQYDPVFALGFVTVYDQLMEGYPSEEDRNAIFKAYVEALKEDPEQYRADAQKLEEWARTQNANTLVDFSSKDGEIENIFKDIAQRAGTKDGFCYSRLFAVGLFRLLELANVTDPTILEKNQKVWTGTLTFIAICCPSWFRLKSC	At2g20890	XP_004243305.1	6	65	6	3.394	0.0218863	5	3	8	29.3	protein.targeting	Cp	68	1	Cp	Cp	Cp	Cp	97.7	thylakoid-peripheral-stromal-side envelope-inner-peripheral-stromal-side	plastid	plastid
	Solyc03g112640	-	CHLOROPLAST-LOCALIZED SEC14- LIKE PROTEIN	AT5G63060	XP_004236232.1	MSFQLVLRPPLLGRHLVKATPIVATGYSRLRIRNCLNMDPHKSQKLVLDVKERLKREYADLPVGRNGRDDEEMILWFLKDRKFSVDDAVSKLHKAIRWRHEFGVSDLSEESVKNSAETGKAYVHDSFDVNGRPVLIVDASKHFPQKQDPDEDEKLCVFLIEKALSRLPAGKQDILGIFDLRGFGTENADLKFLTFLFDVFYYYYPRRVSQVLFVDAPFVFKPLWQLVKPMLKQYASLVRFCSAKEVREEYFTEETLPASFRK	7	23	7		0.019223	0	1	1	'13.5.3.6'	'Cell division.plastid division.thylakoid organisation.thylakoid biogenesis factor *(CPSFL1)'	M	na	1	-	M	Cp	Cp	84.75	plastid	plastid	-
Other fibrillinsA	Solyc11g044530	FBN3	PAP fibrillin (AHRD V1 ***- A2Q498_MEDTR); contains Interpro domain(s) IPR006843 PAP fibrillin	MALSSLSPPLTHISSTKLHLSFPCIVNPHPHSHNYTNLSPLNKKWQTNVSFFPSFFNKKTKDPTPIKQELLQAIEPLDRGADATPQDQQIIDQIACRLEACNPTKEPLNSTLLNGKWELIYTTSKSILQIQRPKILRSRLNYQAINVDTLRAQNMEGWPFFNQVTADLTPLNAQKVAVKFDYFKIAGLIPIKAPGRAKGELEITYLDEELRVSRGDLGNLFILKMVDPSYKVPT	At3g26070	XP_004250746.1 Laizet et al (2006)	4	11	3	1.276	0.00822831	5	2	7	31.1	cell.organisation	Cp	67	2	Cp	Cp	Cp	Cp	99.9	thylakoid-peripheral-stromal-side	plastid	plastid
	Solyc11g005340	FBN5	PAP fibrillin family protein (AHRD V1 **-- B5W0K3_SPIMA); contains Interpro domain(s) IPR006843 PAP fibrillin	MATKALIQPQIRVSHLSPPLPNSIEMMIRNNNIINSPRNFNKISRFERTIFASSQQQQSNVEISHSTSSQIKIQLYDALQGINRGIFGVSSDKKIEIEELVKQLESQNPTFEPTLSLDKVAGNWKLIYSTISILGSRRTKLGLRDFITLGDLYQNIDISEGKAVNVIKFNARGLSLLSGELRIEASFKIASKSRVDIFYNNSGITPDQLMNVFQKNYNLLLGIFNPQGWLEITYVDENLRIGKDDKGNIFVLERVN	At5g09820	XP_004249867.1 Laizet et al (2006)	6	14	6	1.894	0.0122135	5	3	8	31.1	cell.organisation	Cp	12	3	-	M	Cp	Cp	68.6	thylakoid-peripheral-stromal-side	plastid	-
	Solyc08g006160	FBN6	Probable plastid-lipid-associated protein 8, chloroplastic (NCBI), Plastid fibrillin 6-like (based on At homolog) (Fragment) (AHRD V1 **-- A6XBK9_COFCA); contains Interpro domain(s) IPR006843 PAP fibrillin	MTTHVVAGTGTTAAALIGNPRRRSSPAAQSSLHLPLNSHQNRSNRRRMFSPIYASVSASPAPVTKPDDLVDTILSKVTQTDRGVLLTRDEHKSVAKVVQELQRFCVDEPVKCPLIFGEWDVVYCSNPTSPGGGYRSAFGRLFFKTNEMIQVVEAPDIVRNRVSFSLFGFLDGEVSLKGKLNVLDEKWIQVVFEPPELKVGGLDFQYGGESEVKLEITYIDEKIRLGKGSRGSLFVFQRRKP	At5g19940	XP_004244474.1 Laizet et al (2006)	4	13	4	1.848	0.0119169	5	3	8	31.1	cell.organisation	Cp	57	2	Cp	Cp	Cp	Cp	98.8	thylakoid-peripheral-stromal-side	plastid	-
	Solyc10g018590	FBN9	Fibrillin; Os04g0551700 protein (Fragment) (AHRD V1 ***- Q0JB74_ORYSJ); contains Interpro domain(s) IPR006843 PAP fibrillin	MATCFFSLPNSFPSKPKSHKRPIHSSSLTSQSQKIHLLNLISDQERGLKTQSDPQKLSQIIQAIDDLGSIGRDTVTTGSSLSATWRLLWTTEKEQLFIIKNASFFGTKAGDVLQVIDVEKKTLNNVITFPPDGVFFVRSTIEVASSQRVNFRFTSAVLRGKNWEFPLPPFGQGWFETVYLDDDIRVVKDIRQDYLIVERAPYTWKE	At4g00030	Laizet et al (2006)	12	83	12	10.659	0.0687348	5	3	8	31.1	cell.organisation	Cp	24	2	Cp	Cp	Cp	Cp	95.7	thylakoid-peripheral-stromal-side	plastid	-
	Solyc01g006330	FBN10	PAP fibrillin family protein IPR006843 PAP fibrillin	MTTIMEIGNLGVGFRPQIAINSTRKWRCKQFLGQKMQNKKNFLLVCSVASKVCSFSEEENGLIEALIGIQGRGRAASPQQLQEVERAVEVLEGSEGVPEPTSSSLIEGRWQLMFTTRPGSASPIQRTFVGVDSFSVFQEVFLRTNDQRVSNIVKFSEAIGELKVEALATIKDGKRILFQFDRAAFTFKFLPFKVPYPVPFRLLGDEAKGWLDTTYLSPSGNLRISRGNKGTTFVLQRETEPRQKLLSSISTGTRVEKAIDEFISLNQNVVNPELELLEGEWQMIWSSQVETDSWLEGNGLMGNQIVKPNGQLKFLVGILFGIRFSMTGKYEKSGSNVYDVIMDDGAILAGMYGIPVEMESKFTIEILYTDDKIRISRGYNKILFVHVRVDGSNMKP	At1g51110	XP_010316007.1 Laizet et al (2006)	14	65	14	6.079	0.0392005	5	3	8	31.1	cell.organisation	-	-	2	-	none	Cp	Cp	81.93	thylakoid-peripheral-stromal-side	plastid	plastid
	Solyc06g069030	FBN-like	PAP fibrillin domain containing protein expressed (AHRD V1 **-- D8L9T8_WHEAT)	MLLQSSSLLSLKWSTNPSICTFHIPCHHSKLLTPLRFSALKTRAIHDEKDQNSQPPVLIQDKENELLNQEVEESVRVLKNAAKTRKVPAEEILAALAAIERAKIDSSRFLETLGGAKSPGRTWMLIFTADKGLGQGRYFPITAIQRFDAAAKRIENGVYLGPLGFLTFEGPFSWKNRILAFVFERLRIKVGPFNPFDISIKGKEEREPSNKDKDPFFIWFYIDEEIAVARGRSGGTAFWVRCRRVGYS	At1g18060	XP_004241635.1	3	11	3	0.931	0.00600357	4	3	7	35.2	not assigned.unknown	Cp	43	5	-	none	Cp	Cp	84.3	thylakoid-peripheral-stromal-side	plastid	-
Miscellaneous	Solyc04g073990	ANN1	Annexin IPR009118 Annexin, type plant	MASLTVPAEVPSVAEDCEQLRSAFKGWGTNEKLIISILAHRAQRKLIRQTYAETFGEDLLKELDRELTHDFEKLVVVWTLDPAERDAYLAKEATKRWTKSNFVLVEIACTRSPKELVLAREAYHARNKKSLEEDVAYHTTGNADHRKLLVPLVSSYRYGGDEVDLRLAKAESKVLHEKISDKAYSDDEVIRILATRSKAQLTLNHYKDEYGEDILKQLEDEDEFVALLRATIKGLVYPEHYFVEVLRDAINRRGTEENADHLTRVIATRAEVDLKTIANEYQKRDSVPLGRAIAKDTGGDYENMLVALLGQEEE	At1g35720	XP_001234104.1	4	7	4	0.73	0.00470742	5	2	7	31.1	cell.organisation	_	-	3	-	none	Cp	C	87.58	-	peroxisome	-
	Solyc04g055170	ANN2	Annexin 2 IPR009118 Annexin, type plant	MSSLKVPASVPDPYEDAEQLKKAFKGWGTNEELIIQILAHRAQRKLIRDSYAAAYGEDLLKDLDSELTSDFQRVVLLWTLSPAERDAYLVNEATKRLTASNWVIMEIACTRSSDDLFKARQAYHARYKKSLEEDVAYHTSGDFRKLLVPLITAFRYEGDEVNMTLARKEANILHEKISDKAYNDEEIIRIISTRSKAQLSATFNHYNNADHHGHEIIKDLEADDDDEYLKLLRAAIECLKTPEKHFEKVLRLAIKKLGTDEWDLTRVVATRAEVDMERIKEEYHRRNSVTLDRAIAGDTSGDYEKMLLALIGHGDA	At5g65020	NP_001234101.2	2	3	2	0.245	0.00157989	3	0	3	31.1	cell.organisation	_	-	2	-	none	Cp	C	96.75	-	plasma membrane,cytosol	plastid
	Solyc03g114450	CAS	Calcium sensing receptor (AHRD V1 ***- C7BCU7_LIQFO); contains Interpro domain(s) IPR001763 Rhodanese-like, thylakoid membrane	MALRASATAKSPLPLPPPPPSSSSSTSSPPKVFSLPKLTQKPVSVSFSTSTALFLFPLFTATHEARAINLPKEDIVSSLNQVESVVNQAQEVGSNIFDTVSGVignaPVIEFVKPGIDAALPLVKQAGEEVLKNASPVISDATKKAQEAMQSAGMDSEPVMTAAKTVVDAAQQTSKVIEGAKPIATSTVETISSTDPAVIAVAGGTLFLAYLLLPPVFSALSFSFRGYKGELTPAQTLDNMCSKNYVLIDIRTEKDKDKAGIPRLPSSAKNKMIQIPLEDLPSKVKSLVRNPKKVEAEIVALKISFLKKINKGSNIVIMDSYSDSAKTVAKSLTSFGFNNCWIMTDGFSGGKGWLQSRLGTDSYNFSFAEILSPSRVIPGRRFGTTGTVKLLSD	At5g23060	XP_004236097.1	2	4	2	0.179	0.00115428	3	1	4	35.2	not assigned.unknown	Cp	76	2	Cp	Cp	Cp	Cp	99.5	thylakoid-integral; mitochondria	plastid	plastid
	Solyc02g080220	PME	Pectinesterase (AHRD V1 ***- B9RXQ4_RICCO); contains Interpro domain(s) IPR000070 Pectinesterase, catalytic	MTTNYSSQPLLDSPKTKSSSSTKALYVLLSLAAIVGSVGFISIWAINRTSISLTTRVCDTAHDQPSCLAMLSEVAPAGLMDTKTVDLLQMVLHKSSLKIHETIHLASNVNGRINNGQEQVALEDCLELMDLSRDRLMDSMMGLGNLTAQAHFDVHSWLSSILTNHVTCIDGLNGQVRSIMEPMLNDLVARARTSLALMVAIAPQKNIVPTVSDGLPSWVSANDRRLLQLSANAIAANVVVAKDGSGKYKTVKEAVASAPDNSKTRYVIYVKKGIYKENVEIGKTKKNLMLVGDGMDATIITGNLNVIDGSTTFKSATVAAVGDGFIAQDIQFQNTAGPQKHQAVALRVGADQSVINRCKMDAFQDTLYTHTLRQFYRDCYITGTVDFIFGNAAVVFQNS…	At1g11580	XP_010316615.1	2	5	0	0.233	0.0015025	3	1	4	10.8.1	cell wall.pectin*esterases.PME	Cp	68	3	Cp	none	Cp	V	47.7	-	-	-
	Solyc01g095000	-	Homology to unknown gene (AHRD V1 *-*- Q019E6_OSTTA); Nuclear transport factor 2 (NTF2) family protein	MATFTSFASIKIPYLQSGDRRSIFRPNSSKKILKLPRCNVENSTSNSSNNTSTSSQDSESENLLLKMAWYGSEFLGIAASIFRSPAGTEAPSEGNLELATDGSGLVDRALVVDNIKDDFQRSYFVTGNLTLNAYEDKCEFADPAGSFKGLSRFKRNCTNFGYLVETSNMKLMKWEDFEDKAIGHWRFSCILSFPWKPILSATGYTEYYFNEKSGKVCRHIEHWNVPKMALLKQIIRPSRGEKASG	At2g46100	XP_004229946.1	1	2	1	0.212	0.00136709	2	0	2	35.2	not assigned.unknown	Cp	37	1	Cp	possibly Cp	Cp	C	52.6	-	plastid	-
	Solyc01g090670	-	Nuclear pore glycoprotein p62 (AHRD V1 *--- C0HBQ2_SALSA); contains Interpro domain(s) IPR007758 Nucleoporin, Nsp1-like, C-terminal	MSTGFSFSSSTSPFSFSSNPSFTTTPSVAATTSASGSSPFSSPFANPNPTSSTPSFGFGTSTTSASSAPSFGFGSSTTSASSAPSFGFGSSTTSASSAPSFGFGSNTGASTPSFGFSSSAASGSSPQPTLFGSSSGSTTSASGSPLFGANSASAAANSSPFGSSLFGSSGTPSPGLFGSSSAAASNSGLGLFDSSPFLSSTTASTGNAASSASTTPFSSSLFVSSSSASSSPFGSSSTAPSFGFPSSAASLSFQSASNSASSSPGLSFASSAAASSFSSSSAFSFPGASPASSASSAPGFSLLSTSTTTSISSAPGFSLAAASTSSAVSSPAFSFSTSSSAASGPAISLSTPTPSAASPAPSFSFSMPAAASSSPSPFSASSSPSPFSVAKGTVSSVTA…	At2g45000	NP_001332778.1	1	1	1	0.166	0.00107045	1	0	1	35.2	not assigned.unknown	Cp	28	1	Cp	Cp	Cp	N	98.3	-	-	-
	Solyc03g059180	-	Rhodanese/Cell cycle control phosphatase superfamily protein (TAIR)	MATLPVCSATACSSSHSQIPFYGGLRSFSSCWKTYQLKCNVVDLSTSFHLNGPSFRGQSPIFLYSQFVQNSSLSSSSDSICTSCQNVIYSVNRELLTSDARSNSTGNLKFVDSSAVPVGREEMMGFNDDLVNIANFSPESANLESITTVDLTQGNPASILDSMDLETSSLSNVKSSALDVLSQVNKSITGSVENGQSYLNSSLDGISSSVTSAVRGATQAVDDVISKLTSTVDKTGDSAGNGVAAFSTGLKEVSGRVGLLAIDGLRHIILIFEDLVSRGATLVVFSYGSVKEVLPMEVQDLLNVSEERAVKLLTPFGTALGQGYVALEGLERSLGLDPSDPIIPFILFLGVSTAFWAFYWKLTYGGYAGDLSPKSSFELLKGDRKAVLIDIRPEDLREK…	At3g59780	XP_010317888.1	1	1	1	0.116	0.000748028	1	0	1	35.2	not assigned.unknown	Cp	38	4	Cp	Cp	Cp	Cp	73.8	thylakoid	plastid	-
	Solyc11g042620	-	Nuclear transport factor 2 (NTF2)-like protein (AHRD V1 ***- Q67TV5_ORYSJ); contains Interpro domain(s) IPR009959 Protein of unknown function DUF1486	MVMLMSSTSSFSLLPLNSNPSTSTTAAVVGNSPAVLHSVNCCTDYLFRIVSGHRIRQVAVRNSNRTAEVTSSSDSVTDLESAASVVRKFYAGINRRDLDSVEELIAEDCVYEDLVFPQPFVGRKAILDFFKKFTDSVGSDLQFVIDDISKEDSSAVGVTWHLEWRGRPFPFSKGCSFYRLEVVNGQMKILYGRDSVEPAVKPGETALVAIRGVAWLLQKFPQLADRL	At1g71480	XP_004250716.1	1	1	1		0	0	1	1	35.2	not assigned.unknown	Cp	na	1	Cp	Cp	Cp	Cp	98.7	plastid	plastid	plastid
A Proteins were identified by acetone preparations and/or the gel method. For emPAI and Mol% calculations, only the data from the acetone prepartions were used. Proteins identified solely by the gel method have data for the number of peptides, PSMs and unique peptides.
B Names of tomato proteins were based on the literature, NCBI annotation (identified in BlastP searches), and/or SolyGenomics descriptor. In a small number of cases, tomato protein names were assigned based on NCBI annotations and the Arabidopsis homolog. Fibrillins are also known as plastid lipid-associated proteins (PAPs) (Laizet et al 2004).
C Some Sol Genomics descriptors were updated when NCBI annotations and Arabidopsis gene annotations were aligned.
D Target P's subcellular locations are: chloroplast (Cp), mitochondria (M), secretory (S), and no predicted location is indicated by a dash (-).
E ChloroP was used to predict the presence of a chloroplast transit peptide (Y) and the lack of a predicted transit peptide is indicated with a dash (-). Some proteins were identified as stromal after TargetP1.0 was terminated. Their transit peptide predictions were not made (na).
F Predotar's predicted subcellular locations were: chloroplast/plastid (Cp),endoplasmic reticulum (ER) or mitochondrion (M). For proteins with localization predictions that were less clear, Predotar provided categorized of possibly Cp, M and ER. Proteins with unresolved locations or that did not have a homolog detected by Predotar are indicated with a dash (-).
G WoLF PSORT's and YLoc's predicted subcellular locations were: chloroplast/plastid (Cp), cytosol (C), cytoskeleton (Cy), endoplasmic reticulum (ER), extracellular (EX), golgi apparatus (G), mitochondrion (M), nucleus (N), peroxisomes (P), plasma membrance (PM), and vacuole (V). Proteins with no chloroplast location in WoLF PSORT are indicated by not Cp.The number of proteins predicted to be in t…

## Sheet: Table S6B-TAC & Nucleoid
Table S6B. PEP, PEP associated proteins and other proteins associated with transcriptionally active chromatin
Gene and protein descriptors							ProteomicsA								Bin codes		Algorithms								Databases
Category	Tomato Gene ID	Gene nameB	DescriptionC	Protein Sequence	Arabidopis homolog	Tomato proteinB NCBI accession	Peptides	PSMs	Unique Peptides	emPAI	Mol%	Acetone samples	Gel samples	Total	Bincode	Name	TargetP D ver.1	Transit peptide length	TargetP (reliability class)	ChloroP E	Predotar F	WoLF PSORT G	YLoc G	YLoc % Confidence	PPDB	SUBA4	plprot
Plastid-encoded RNA polymerase subunits (PEP)	544163644	RPOA	RNA polymerase alpha subunit (chloroplast) [Solanum lycopersicum]	MVREKVTVSTRTLQWKCVESRTDSKRLYYGRFILSPLMKGQADTIGIAMrRNAALLGEIEGTCITRVKSEKVPHEYSTITGIQESVHEILMNLKEIVLRSNLYGTSEASICVKGPGYVTAQDIILPPYVEIVDNTQHIASLTEPIDFCIGLQIERNRGYLIKTPHNFQDGSYPIDAVFMPVRNANHSIHSYGNGNEKQEILFIEIWTNGSLTPKEALHDASRNLIDLFIPFLHMEEDNLYLQDNQHTVPLSPFTFHDKLAKLIKNKKKIALKSIFIDQSELSSRIYNCLKMSNIYTLLDLLNNSQEDLMKIEHFRSEDIKQILDILEKYFVIDLAKNKF	Atcg00740	YP_008563120.1	4	6	4	1.154	0.00744159	4	0	4	27.2	RNA.transcription	-	-	-	-	-	-	-	-	plastid nucleoid	plastid	-
	544163605	RPOB	RNA polymerase beta subunit (chloroplast) [Solanum lycopersicum]	MLGDGNEGISTIPGFNQIQFEGFCRFIDQGLTEELYKFPKIEDTDQEIEFQLFVETYQLVEPLIKERDAVYESLTYSSELYVSAGLIWKNSRDMQEQTIFIGNIPLMNSLGTSIVNGIYRIVINQILQSPGIYYRSELNADHNGISVYTGTIISDWGGRSELEIDRKARIWARVSRKQKISILVLSSAMGLNLREILENVCYPEIFLSFLNDKERKKIGSKENSILEFYQQFACVGGDPVFSESLCKELQKKFFQQRCELGRIGrRNANMNRKLNLDIPQNNTFLLPRDILAAANADHLIGLKFGMGALDDMNHLKNKRIRSVADLLQDQFGLALVRLENVVRGTICGAIRHKLIPTPQNLVTSPPLTTTYESFFGLHPLSQVLDRTNPLTQIVHGRKL…	Atcg00190	YP_008563080.1	6	14	5	0.551	0.00355313	5	0	5	27.2	RNA.transcription	-	-	-	-	-	-	-	-	plastid nucleoid	plastid	-
	544163603	RPOC2	RNA polymerase beta' subunit (chloroplast) [Solanum lycopersicum]	MEVLMAERANLVFHNKAIDGTAMKRLISRLIEHFGMAYTSHILDQVKTLGFQQATATSISLGIDDLLTIPSKGWLVQDAEQQSLILEKHHQYGNVHAVEKLRQSIEIWYATSEYLRQEMNPNFRMTDPFNPVHIMSFSGARGNASQVHQLVGMRGLMSDPQGQMIDLPIQSNLREGLSLTEYIISCYGARKGVVDTAVRTSDAGYLTrRNALVEVVQHIVVrRNATDCGTARGISVSPRNGIMPERIFSQTLIGRVLADDIYMGSRCIATRNQAIGIGLVNRFITFRAQPISIRTPFTCRSTSWICRLCYGRSPTHGDLVELGEAVGIIAGQSIGEPGTQLTLRTFHTGGVFTGGTAEHVRAPSNGKIKFNEDLVHPTRTRHGHPAFLCSIDLYVTIES…	Atcg00170	YP_008563078.1	10	16	9	0.396	0.00255361	4	0	4	27.2	RNA.transcription	-	-	-	-	-	-	-	-	plastid nucleoid	plastid	-
	544163604	RPOC1	RNA polymerase beta subunit (chloroplast) [Solanum lycopersicum]	MNNNFSSMIDRYKHQQLRIGSVSPQQISAWATKILPNGEIVGEVTKPYTFHYKTNKPEKDGLFCERIFGPIKSGICACGNYRVignaDEKEDPKFCEQCGVEFVDSRIrRNAYQMGYIKLACPVTHVWYLKRLPSYIANLLDKPLKELEGLVYCDFSFARPITKKPTFLRLRGLFEYEIQSWKYSIPLFFTTQGFDTFRNREISTGAGAIREQLADLDLRIIIENSLVEWEELGEEGHTGNEWEDRKVGrRNAKDFLVrRNAVELAKHFIRTNIEPEWMVLCLLPVLPPELRPIIQIDGGKLMSSDINELYrRNAVIYRNNTLTDLLTTSRSTPGELVMCQEKLVQEAVDTLLDNGIRGQPMRDGHNKVYKSFSDVIEGKEGRFRETLLGKRVDYSGRS…	Atcg00180	YP_008563079.1	6	6	6	0.425	0.00274062	1	0	1	27.2	RNA.transcription	-	-	-	-	-	-	-	-	plastid nucleoid	plastid	-
PEP-associated proteins and additional TAC components	Solyc03g120230	MFP1	MAR-binding filament-like protein 1 (AHRD V1 **** MFP1_SOLLC); contains Interpro domain(s) IPR009053 Prefoldin; Encodes a DNA-binding protein that binds to plastid DNA non-specifically and is associated with Nucleoids and thylakoid membranes.	MATSCFPPFSASSSSLCSSQFTPLLSCPRNTQICRKKRPVMASMHSENQKESNVCNRRSILFVGFSVLPLLNLRARALEGLSTDSQAQPQKEETEQTIQGSAGNPFVSLLNGLGVVGSGVLGSLYALARNEKAVSDATIESMKNKLKDKEDAFVSMKKQFESELLSEREDRNKLIRREGEERQALVNQLKSAKTTVISLGQELQNEKKLAEDLKFEIKGLQNDLMNTKEDKKKLQEELKEKLDLIQVLEEKITLLTTEIKDKEVSLRSNTSKLAEKESEVNSLSDMYQQSQDQLMNLTSEIKELKDEIQKRERELELKCVSEDNLNVQLNSLLLERDESKKELHAIQKEYSEFKSNSDEKVASDAKLLGEQEKRLHQLEEQLGTALSEASKNEVLIADL…	At3g16000	NP_001234309.2	24	67	24	3.245	0.0209254	5	3	8	27.3.34	RNA.regulation of transcription	Cp	41	2	Cp	Cp	Cp	N	96.7	plastid nucleoid	plastid	-
	Solyc05g007100	WHY1 PTAC1	Whirly 1, DNA-binding protein p24 (AHRD V1 **-* Q9LL85_SOLTU); contains Interpro domain(s) IPR013742 Plant transcription factor	MSVFSLSASPASGFSLNPTKTSSYLSFSSSINTIFAPLTSNTTKSFSGLTYKAALPRNLSLTCRHSDYFEPQQQQQQLQGASTPKVFVGYSIYKGKAALTVEPRSPEFSPLDSGAFKLSKEGMVMLQFAPAAGVRQYDWSRKQVFSLSVTEIGSIISLGAKDSCEFFHDPNKGRSDEGRVRKVLKVEPLPDGSGHFFNLSVQNKLINLDENIYIPVTKAEFAVLVSAFNFVMPYLLGWHTAVNSFKPEDASRSNNTNPRSGAELEWNR	At1g14410	NP_001289829.2	2	4	2	0.468	0.00301791	4	3	7	27.3.67	RNA.regulation of transcription	Cp	52	1	Cp	Cp	Cp	Cp	99.9	plastid stroma	plastid	-
	Solyc03g113630	PTAC2 (PAP2)	Plastid transcriptionally active 2 [Arabidopsis thaliana]	MSLSYNTFSQVLTPVPPSHRYLFPAKIPNYYKLPGLHRRLLLTVAVRAKPKDLILGNPTVTVEKGKYSYDVETLINKLSSLPPRGSIARCLDTFKNKLSLTDFSLVFKEFAARGDWQRSLRLFKYMQRQIWCKPNEHIYTLMIGILGREGLLDKAFEIFDEMSTHNVARTVFSYTAIINSYGRNGQYETSLQLLEKMKQENIVPSILTYNTVINSCARGGYEWEGLLGLFAEMRHEGIQPDLVTYNTLLSACSSRELEDEAEMVFRTMNEAGVLPDVTTYSYLVETFGKLGKLEKVSELLMEMEAGGTSPEVTSYNVLLEAYAHLGSMKEAMDVFRQMQAAGCVAETYSILLNLYGKNGRYDQVRELFLEMKTSNTEPDADTYNILIQVFGEGGYFKEV…	At1g74850	XP_004236160.1	7	13	7	0.567	0.00365631	4	0	4	27.3	RNA.regulation of transcription	M	47	5	-	none	Cp	Cp	98.87	plastid nucleoid	plastid	-
	Solyc04g050540	pTAC3 (PAP1)	Plastid transcriptionally active 3; Pentatricopeptide repeat protein (AHRD V1 *-*- Q1G1I8_MAIZE); contains Interpro domain(s) IPR003034 DNA-binding SAP	MAGLSIHLPFNSKFNLPIPYTSISRSIGSRVKASVSSQPRKTRRKKQQQHQLKTVDDDGSMASGTEKVLRLVFMEELMERARNADSAGVSQVIYDMIAAGLSPGPRSFHGLVVAHVLHRDNDGAMHALRRELSEGLRPLHETFLALVRLFGANGLATRGLEILAAMEKLNYDIRQAWLVLVEELVRSNHLEDANKVFLKGAEGGLRATDEIYDLLIEEDCKVGNADHSNALTIAYEMEAAGRMATTSHFNCLLSVQASCGIPEIAFATFENMEYGDNADHMKPDTETYNWVIQAYTRAESYDRVQDVAELLGMMVENADHKRLQPNVRTYALLVECFTKYCVVREAIRHFRGLKNFEGGTQVLYNDGKYGDPLSLYLRALCREGRIVELLEALEAMAKD…	At3g04260	XP_004237508.1	8	9	8	0.567	0.00365631	3	1	4	28.1	DNA.synthesis/chromatin structure	Cp	36	1	Cp	Cp	Cp	N	99.9	plastid	plastid	-
	Solyc11g008990	PTAC4 (VIPP1)	Plastid transcriptionally active 4 (At1g65260); Membrane-associated protein VIPP1, chloroplastic	MAVRTPITGITMSSAPSISSCNRVVVVKVMPFRASFFGQGVGAVKLAGLQLTHSYRSRCNSHGGGALGARMNLFDRFARVVKSYANALISTFEDPEKILEQTVLEMNNDLIKLRQATAQVLASQKQLENKYKAAQQASEDWYrRNAAQLALGKGDEDLAREALKRKKSYADNANALKTQLDQQKAVVDNLVSNTRLLESKIQEAKSKKDTLKARAQSAKTATKVSEMLGNVNTSSALSAFERMEEKVLTMESQADALNQLTSDELEGKFALLETSSVDDDLASLKKELSGSAKKGDLPPGRTPVTRSSSPLQFQDSEIEKELNELrRNARANDF	At1g65260	XP_004250100.1	4	8	4	0.833	0.00537162	4	1	5	27.3.99	RNA.regulation of transcription	Cp	58	2	Cp	Cp	Cp	Cp	55.3	thylakoid-peripheral-stromal-side plastid stroma envelope-intermembrane space	plastid	plastid
	Solyc09g091830	PTAC5	Protein disulfide isomerase pTAC5, chloroplastic [Solanum lycopersicum]	MASSLPLSFHIITSNLHSNNTYTPKFFSLKNSSASVSVSHVCYSGSPEREESRWLREEQRWLREEQRWLREERRWEAEREALLVQIRELELRVKEVESSRDSLLPEATSVTETVANIAKLLQLLKEGEVGKNVTVIAESGSIALPLVLEEAKQNEVIVKEEPQQEKVIREVPKELEGEGNKAKKRRSLKKGSEGDEVRLMQEQLLKLGFYCGEEDMEFSSFSSGTERAVKTWQASSDLREDGIMTSELLEKLYMVQNIERVKENPKQPDGTEAKTSANGAPITSIMEIEEVQQTIVKEDGVSETEVSHHRVFLLGENRWEEPSRLSSSKKPAETSSASTTIKCITCRGEGRVLCMECDGTGEPNIEEQFMEWIDEGMKCPYCEGHGFLTCDVCQGNKIM…	At4g13670	XP_004247853.1	1	1	1	0.129	0.000831859	1	0	1	27.2	RNA.transcription	Cp	37	1	Cp	Cp	Cp	N	88.2	plastid nucleoid	plastid	-
	Solyc04g057870	PTAC6	Plastic transcriptionally active 6	MSAGLLLPLPVKLSTFSTAPSSLSTPTLFTVSFAKTISNNLIFVKQSLSSKRPDFRVFADDGDADGGGTDEYDMDEDEVEEADNKKDFDVDYDTLLGGGSAISLAVARGDDDIAMVNSSSFVFTQGWDSEKIVDYRIKEEEFHKICLFDCDFFIRKPPDPDDDVYDFREMYVTPPDTDIYAIPRVLAPMPQKYIRCAMSDYGCYNVTEPPIDAPRDPMYKSEREIMKVFLTKHYRNRRAGDPEFALDFEEIYVIDSKTKSITRAKVVVTVPGGKSRDRKNDLLVIRDNGNSFKIIPSEERDDFTTVIEKEEWKKTRQDMERHLSKLRDFSVSNWF	At1g21600	XP_004237366.1	4	11	4	1.683	0.0108529	5	0	5	27.3	RNA.regulation of transcription	Cp	45	2	Cp	ER	Cp	V	64.9	plastid nucleoid	plastid	plastid
	Solyc03g082970	PTAC7 (PAP12)	Plastid transcriptionally active 7 (AHRD V1 ***- D7M329_ARALY)	MAASTLTFSSFSTLQTFPRIAALENKKRVNLCIRAQSASNSKNEGRGERRIWRRRKLTKKDETLDAKMERIPFLEEQVRKIRDGGKLLTMDIHRLLLNEDNRFDFVNEIAAEAKQYVENNRDEYGAKKAILHVLSNRMNDAGVYRSEAYMDSDPFKPGPGYLKDELL	At5g24314	XP_004234982.1	2	4	2	1.154	0.00744159	1	0	1	35.2	not assigned.unknown	Cp	34	2	Cp	Cp	Cp	N	95.6	plastid nucleoid	plastid	-
	Solyc10g005050	pTAC8 (CURT1B)	Curvature thylakoid 1B, chloroplastic	MASTTTPSLSLSSSSTLVDGKTTRQSAAVASSQCVTLPTLPPRPAVQSRAARTTAYCRKIARNVAAMATSTGEVATADATAETATTELPSELVQKIQEVWDKVDDKYAVSSLGVAAFILLWSSTGVISAIDRLPLIPGVLELVGIGYTGWFAYKNLIFKPDREALIAKIKELYKDILGSS	At2g46820	XP_004248418.1	2	2	2	1.512	0.00975016	2	0	2	1.1.2.2	PS.lightreaction.photosystem I.PSI polypeptide subunits	Cp	65	1	Cp	Cp	Cp	Cp	99.8	thylakoid	plastid	plastid
	Solyc03g111050	pTAC10 (PAP3)	Plastid RNA-binding protein (AHRD V1 **-- D6QX33_NICBE); contains Interpro domain(s) IPR003029 Ribosomal protein S1, RNA binding domain; NCBI calls it CIP5 (Constans interacting protein 5)	MQTLQTCSFFFTFPSPKTLLKPINSSKFTSFPFFNLSTSSNFKHSPLTLHCFSSDEYPVGDDDAFLEAFGPKEKESEEEARRRNWVDRGWAPWEEILSPEADFARKSLNEGEEVALQSPEAIEAFRMLSPNYRKKKIEEMGITEDEYYAKQFEIKGDIPEPLETTWAGPLVVRHVPPRDWPPRGWEVDKKELEFIREAHKMQAVRVDYDKVEEMVNTETDDMSLERYKVFLKQYNEWVAANKDRLEEESYKYDQDYYPGRRKRGKDYQDGMYELPFYYPGQICAGKVTAIHLYQGAFVDIGGVHDGWVPIKRNDWYWIRHHIKVGMHVMVEILAKRDPYRFRFPIEMRFVDPNINADHLIFNRFDFPPIFHREEDTNLDELRRDCGRQPIPRKDPGVKV…	At3g48500	NP_001334062.1	9	18	9	1.264	0.00815093	5	0	5	35.2	not assigned.unknown	Cp	67	3	Cp	possibly Cp	Cp	N	82.6	plastid nucleoid	plastid	plastid
	Solyc02g070390	PTAC12 (HEMERA)	PTAC12 (AHRD V1 ***- D7LH29_ARALY)	MASVLSTSLYQDRGLRIVASTDGFVPTICCPYRKTLFTGTTPVSIWKLKFVSSSPFQKAPLAPCIKCENKEKNQGSFEQVSVERFPYHSYMDSTSGQLEPASGARASIPGKEYWPEGTASRVQAARAPEPDGISTGTPSYGKAPGSRRKKYKASASSSQPSEINVISDDPLETPDSVPEEPKDLSSEYVIYQPEQDEEELTGYELDKRHGRPHPFIDPKVKKEIEKPLTSEELWWNWRKPEKEQWSRWQRRRPDVETVFLKAMAETGQVKLYGEHPTLTETALYRARRHLYKEERLQAEKEKMEKIGPIAYYSEWVKAWKRDTSRDAIQKHFEETGEDENTQLIEMFSHQTDREYRIMMGTDMRIPRDPLAMRMREDQIKQIWGGDPVYPTINYIQDPD…	At2g34640	XP_010315857.1	6	14	6	0.995	0.00641628	5	0	5	27.3	RNA.regulation of transcription	-	-	5	Cp	Cp	not Cp	C	92.2	plastid nucleoid; nucleus	plastid	plastid
	Solyc02g081920	pTAC14 (PAP7)	Plastid transcriptionally active 14	MVSSTILIQQPTNFFHQPELHHQLWRGLQHGCVASLQKQPILVCNSNKRNRPLRVSSSANGAVTSSTLEAYDSSPSPSAFPLFTPPSQPQDTPASQLELADPDFYKIGYVRSFRAYGIEFREGPDGYGVFASKDVEPLRRARVIMEIPLELMLTISKKLPWMFFPDIIPVGHPVFDIINSTNPETDSDLRLACLLLYAFDCKDNFWQLYGDFLPSADECTSFLLATEEDLLELQDEKLASTMREQQNRALEFWEKNWHSAVPLKIKRLAQDPERFIWAMSIAQSRCISMQTRIGSLVQEANMLVPYADMMNHSFQPNCFFHWRFKDRMLEVMINAGQKIRKGDEMTVNYMAGQKNDLFMQRYGFSSPVNPWDVIHFTGDAKIHLDTFLSVFNISGLPGE…	At4g20130	XP_004232623.1	5	5	5	0.688	0.00443658	1	0	1	1.3.13	PS.calvin cycle.rubisco interacting	-	-	5	Cp	possibly Cp	Cp	N	95.5	plastid nucleoid	plastid	plastid
	Solyc03g081300	pTAC15 (mTERF8)	pTAC-15, MTERF8-like. At4g38160-like protein (Fragment) (AHRD V1 *--- C0JEI4_9BRAS); contains Interpro domain(s) IPR003690 Mitochodrial transcription termition factor-related	MSTPTKSFRLSPSPSCLFPPIRTLFPSALLPCQKLAFYPQKQDKLPLHFLVPQDSTLLLLKCNALAINDSSTNSFVDSGVMLFSLFREIGFNETDTEALLDAHPVISLTPFESIRTRIHSLQSLGVSGLALSRLIVKRPDVLTAVEIDGLVSFLIEGDLELAGKIKSSQIEHLFNSTEPRFLEGFETKVRLLLEFGITQDTIVHVLNNANLTKAFCLKSFEDIERMLTFLNRFGGGDLILRRPALLNYDLDAQLIPRVGFLLELSGGDETGTATVLRKLPFVVAYSVNADHLKNADHVEFLKSYAGLSEEEIFRIVLVYPNMFSASRKRKLHPRIDFLKQCGLSSHDIFRFLIKIGYKKNTKELAMAMGAVTRTSCKNMQEVignaVFLNYGLTFDDIL…	At5g54180	XP_004235022.1	7	13	7	1.371	0.00884092	3	3	6	27.3.99	RNA.regulation of transcription	Cp	61	5	Cp	none	Cp	G	71.5	plastid nucleoid	plastid	-
	Solyc06g005710	pTAC16 (CURT1B)	Plastid transcriptionally active 16	MAPTLTSNSFLLSTTPHPRLSFKNPRFIVSAKKSGQNQETTTNSGNPFNFDFGKLPDVTSLIPASTNTSSGLSFGRQRAKDPGTVFVAGATGQAGIRIAQLLLREGYSVRAGVSDLGAAQELARLAVSYKVISNDESKRLNAVASSFQDAESIAKAIGNANKVVVTISKGEDGPATEVTTTDAVQVIEAAQLAGVGHVAIVYDESSPVGSTYNVLDGITSFFNNLFSKSQPLTIAEFLQKIVETDLSYTLIKTRLTDDFSPESSYKIVVSAEGSADADAYKVGKSQIAKLVVDVFSNTAVAENKVVEVFADPSAPPKTVDELFSVIPEDGrRNAKAYAEALEKSKAEEEARGVAEASKRQEQEAKKLEKKEAKAAATIAKEPEEKASSPSVPSVESLLD…	AT3G40690	XP_004240374.1	20	105	20	5.404	0.0348478	5	3	8	27.2	RNA.transcription	Cp	29	2	Cp	Cp	Cp	Cp	69.1	thylakoid	plastid	plastid
	Solyc03g117430	pTAC17A	Plastid transcriptionally active 17; CobW-domain protein	MASLSIDIATTFMGLAKRQTPQFYGLRTAVFPTLWKTSKCQRFSLSTSSSSRISVAINTSSKPNRFSRGFTVSATSTSAPQSEDSDILTKIPQDNRIPATIITGFLGSGKTTLLNHILTANADHGKRIAVIENEYGEVDIDGSLVAAKTAGAEEIMMLNNGCLCCTVRGDLVRMIAELVSRKKGKFNADHIVIETTGLANPAPIIQTFYAEDQVFNDVKLDGVVTLVDSKHVGFHLDETKPKGVVNEAVEQIAYADRIIINKTDLVGDSEVSSLIQRIKNINKMAHLKRTQFGKVDLDYVLGIGGFDLERIESSVGAEGSKENADHTGHNADHNADHNADHNADHHHHHNADHNADHNADHEHNADHKHEHHNADHHHSHNADHTHDPGVSSVSIVCEG…	At1g80480	XP_004235904.1	10	88	10	10.22	0.0659039	5	3	8	27.2	RNA.transcription	Cp	73	2	Cp	Cp	Cp	Cp	56.9	plastid stroma	plastid	-
	Solyc08g076020	pTAC17B	Plastid transcriptionally active 17; CobW-domain protein	MGGPVIERRGGSVVWVLRQNGTWWPGRILCINEIPTSGILSCTDFSSRFPIKLLGRDDASVYWYNLEKSSRVKAFRCGEFDSCIKKAESSKTLTYTRSLKYAHREDAILHALELEKQDLEKLGRQVFVSGFKEGEIHGESNQRAKRSRRFYSPIDSISFLEKSVHSQSSNKVATSIHATEISSSKSTSSLKSDSQSSHKKRETTAGNLRPMKMSFKVISRPAVNQWKDVNQKSQPSPGNSFTEDNSIQSLNSKFTTLQNSTKTLIDVHMTVQSTYRGEHTPLVSLMSRLNGKAIIGHPINIEVLYDSSMLPVEKECSDQLKNRSRMPQLVWRTSKRTPVCYTSSTSSATKYENLQHSSKKLGDLSSQARKNGLFNTKSRGKLSKKPNMSKNKSRSLYLA…	At1g80480	XP_004245936.1	2	4	1	0.096	0.000619058	2	0	2	31.1	cell.organisation	M	82	3	-	none	Cp	Cp	57.68	plastid stroma	plastid	-
	Solyc07g049230	pTAC18	Enzyme of the cupin superfamily (AHRD V1 ***- B6TP17_MAIZE); contains Interpro domain(s) IPR014710 RmlC-like jelly roll fold	MASLITMPALSHLSTNTISLERRNLCASSRRRRGVRAMMTEKPLEELYHVRVERNVTKDRLMELGVQRWSMWKTGKCKLPWDWHVDQLVYIEEGEVRVVPEGSKRFMQFVAGDLVRYPKWFEADLYFNDFYQERYRFQAYGDD	At2g32650	XP_004243526.1	1	1	1	0.468	0.00301791	1	0	1	35.2	not assigned.unknown	Cp	36	1	Cp	Cp	Cp	C	82	plastid nucleoid	plastid	-
	Solyc11g065620	SIR	Sulfite reductase (AHRD V1 **** O82802_TOBAC); contains Interpro domain(s) IPR011787 Sulphite reductase, ferredoxin dependent	MTTSFGAAINIAAVDDPNPKLQIQRFNGLKSTSNSILLSRRIHRSFSHSNSTSIVRAVSTPAKPAAVEPKRSKVEIFKEQSNFIRYPLNEEILNDAPNINEAATQLIKFHGSYMQYNRDERGSRSYSFMLRTKNPGGEVPNKLYLVMDDLADQFGIGTLRLTTRQTFQLHGVLKKDLKTVMSTIIHNMGSTLGACGDLNRNVLAPAAPFAKKDYVFAKQTADNIAALLTPQSGFYYDVWVDGEKFMSVEPPEVVKARNDNSHGTNFPDSPEPIYGTQFLPRKFKIAVTVPSDNSVDIFTNDIGVVVVSDEDGEPQGFNIYVGGGMGRTHRMETTFPRLAEPLGYVPKADILYAVKAIVVTQRENGRRDDRRYSRLKYLLSSWGIEKFRSVTEQYYGKKF…	At5g04590	NP_001266248.1	19	117	19	6.43	0.041464	5	3	8	14.3	S-assimilation.APR	Cp	56	1	Cp	possibly Cp	Cp	Cp	94.8	plastid stroma	plastid	plastid
	Solyc08g081170	PAP11 (MURE)	Hop interacting protein; UDP-N-acetylmuramoyl-L-alanyl-D-glutamate--2 6-diaminopimelate ligase (AHRD V1 *-** D7UXP7_LISGR); contains Interpro domain(s) IPR005761 UDP-N-acetylmuramoylalanyl-D-glutamate-2,6-diaminopimelate ligase	MPFTLLSPPPFPSLLHHTLPPLQFKPFISLHHLRLKHPTTLTTVSAIGADGKYYPTPSDDDPPEAPEDSMHGVNKFQQIQRQAAKARKQQEELFKKEQSIFVNALADVEDAPDNPLVHDSDSGDDLFGEIDKAIALKRKDFVKQGLLKPNPKKSALVEVEVEGIDELLPEEVVDLEEISELTGLTEISEGEESEEDRSDFEVSDDVVKAEFSDLSSFDIDFDEYGKAKPRIAEPKFRMSLAELLDESRVVPVSVYGDLEVEISGIQHDSRLVESGDLFVCCVGMKTDGHLYLSEADKRGAVAVVASKEIDIEETLGCKALVIVEDTNAVLAVLAASFYRHPSKSMSVignaVTGTNGKTTTSYLIKAMYGAMGLRTGMLSTVGYYIYGDNKLESPHTTP…	At1g63680	XP_010325293.1	2	5	2	0.172	0.00110915	5	2	7	33.99	development.unspecified	M	82	5	-	Cp	Cp	PM	39	plastid nucleoid	plastid	-
	Solyc05g006110	PRIN2	Plastid redox insenstive 2	MASAISLVSSSILLSSSSSPSVYLPISNSVSWVSSSSSYRCISSWVSPKRCRQNLICRAAEYKFPDPIPEFADAETEKFRNADHLLKKLPKKDIYGDSVEEIVGICTEILNEFLHAEYGGPGTLLVVPFIDMADTINDRGLPGGPQAARAAVKWAQSHVDNDWKEWNSGKKK	At1g10522	XP_004238710.1	1	3	1	1.154	0.00744159	3	0	3	35.2	not assigned.unknown	Cp	58	2	Cp	Cp	Cp	Cp	99.9	plastid nucleoid	-	-
DNA replication, repair, recombination and nucleoid organization	Solyc07g064330	POL1A	DNA polymerase 1A (AHRD V1 ***- Q3LHT0_TOBAC); contains Interpro domain(s) IPR001098 DNA-directed DNA polymerase, family A	MAFLGLSVQSSPFKPTSYVWFSPHSFSSRTFWASSGKALHRGEDCKTRSIESSSLAVFGDPIKQISSHERKLFSSGLQQKIEEDSIYGWEIDAIKALKAKYNSYKKISAANCSVSASIDRKVNDENSDVPIEVNTRMMRERVTSSYSATTCISGGSLSSKSKPPHNPNRGEKKDVGNWREYKKHLPQLSVGINHSRNNEVTSINKVDGPNVSHYKPLSKGSNLNGQLSSKIVKFEKANKLWQGSNQIRDSVNGTDTKVVTVKAKSVILEQATIEREKVKSVATDFVNGNEAKIVSDKGTGLDQITLRERLGAMYEKVHIVDNLSAAKEVVSKLTSQYKHLVHACDTEVANIDIKQQTPVNADHGEVICFSIYSGPEADFGDGKSCIWVDVLDGGGKDLL…	At1g50840	XP_004244135.1	1	1	1	0.043	0.000277286	1	0	1	28.1	DNA.synthesis/chromatin structure	Cp	32	3	Cp	Cp	Cp	Cp	69.4	plastid	mitochondrion plastid	-
	Solyc01g096900	GYRA	DNA gyrase subunit A family protein (AHRD V1 ***- D7L923_ARALY); contains Interpro domain(s) IPR005743 DNA gyrase, subunit A	MKLHTLNPQTSFVQSNSMAFSTGIRLLRCYHHQFTFTAIPSRFSGLRKASSELRFLSSVTPSRKHVRPVSARRKVTEEEVGEEGNGSVVLRDRDGNEGGGGERIVHTELHKEATEAYMSYAMSVLLGRALPDVRDGLKPVHRRILYAMHELGLSSKKPYKKSARVVGEVLGKFHPHGDNAVYDSLVRMAQDFSLRSPLIRGHGNFGSIDADPPAAMRYTECRLEALTEAMLLADLEQNTVDFVPNFDNSQKEPSLLPARIPNLLLNGASGIAVGMATNIPPHNLGELVDALSALIHNPEATLQELLEYMPGPDFPTGGIIMGNIGILEAYRTGRGRVVIRGKTDIELLDAKTKRAAIIIQEIPYQTNKASLVEKIADLVENKTLEGVSDIRDESDRSGM…	At3g10690	XP_004230064.1	10	27	10	0.882	0.00568759	5	3	8	28.1	DNA.synthesis/chromatin structure	Cp	70	4	Cp	possibly Cp	Cp	N	29.4	plastid mitochondria	plastid	plastid
	Solyc12g021230	GYRB	DNA gyrase subunit B (AHRD V1 ***- Q8YLN3_ASP); contains Interpro domain(s) IPR011557 DNA gyrase, subunit B	MALLKPFPLQYSLRRMASRYLLHCHSHTLPFSSTFLSPPSIFLNTRVITRLRRVSDGIFIRNVVSPRAFMSSSVTTEAFQENTKSKAYGSEQIQVLEGLDPVRKRPGMYIGSTGPRGLHHLVYEILDNAVDEAQAGFATKIDVVLHADNSVGITDNGRGIPTELHPVTKKSSLETVLTVLHAGGKFGGSSSGYSVSGGLHGVGLSVVNALSEALEVTIWRDGKEYQQKYSRGKPVTTLICQELPVEIKDWQGTSIRFWPDKEVFTTEIQFDYNTIAGRIRELAFLNPELTIVLKKDDIDPEKIQHAEYFYAGGLVEYVKWLNADKKPLHDVLGFRKEADGITIDMALQWCSDAYSDTVLGYANSIRTIDGGTHIDGVKAALTRTLNSLGKKSKTIKEKD…	At5g04130	XP_004252016.1	7	23	7	0.693	0.00446882	5	3	8	28.1	DNA.synthesis/chromatin structure	M	76	4	Cp	M	Cp	M	99.2	plastid nucleoid mitochondria	mitochondrion	-
	Solyc02g081910	-	DNA topoisomerase IPR005733 DNA topoisomerase I, bacterial-type	MALVQQLLTTASTSCRSIMLQNRTLHNYQANCLQCSTFATVDSFEKMSRKARICCGIRARQPRNLRVVSQQKIHPLRSYYTNEPGSSSAFSVLQLSKEGFPSTPMPIIFSFRPFGGIGSRSYNTDGKMHFSRDARAIADKGSGGAKVFSDGNKTFFKNLKNHSERSNELAVHRRLSDKVTEKGTPNSKVSASKNVDLVISKDTPVKTDEKDVNLDISGIPLGNNGKPTSTGSEKTKKQSRSKKDKNVSSATVDQPKASKTRRAKKPSPAKDEESPAVSEISSPVHSSSVGPADNVSMKVDLAQVKRTSPRKRKPTKVSNSVAELNGATVVPSDSKLVTDKSSDVSSKSKPPGQKKWPKLYPPTAKSVLVVESVTKARVIQGYLGDMFEVLPSYGHVRDL…	At4g31210	XP_010316521.1	1	1	1	0.038	0.000245044	1	0	1	28.1	DNA.synthesis/chromatin structure	M	38	5	Cp	Cp	Cp	N	95.6	plastid nucleoid	plastid	-
	Solyc07g066320	RECA	Protein recA (AHRD V1 ***- B6T788_MAIZE); contains Interpro domain(s) IPR013765 RecA	MELTFPVKAQLFGSKIGHKSLSYSTSVKFYQKVSRPQFSACGIRVRSEFNADHKINGAFSPDSDARILDRQKALDAAMNDINSSFGKGSVTRLGSAGGALVETFPSGCLTLDFALGGGIPKGRIVEIYGPESSGKTTLALHAIAEVQKLGGNAMLVDAEHAFDPAYSKALGVDVENLIVCQPDNGEMALEIADRMCRSGAVDLICIDSVSALTPRAEIEGEIGMQQMGLQARLMSQALRKMSGNASKAGCTLIFLNQIRYKIGVYYGNPEVTSGGIALKFFASVRLEIRSTGKIKSAKGDEEVGIKVRVRVQKSKVSRPYKQAEFEIMFGEGVSKLGCVLDCAELIEVVAKKGSWYNYGEHRLGQGREKALQYLRENPLLSEEIEKMVRSSVLETNGFL…	At1g79050	XP_004243994.1	6	16	5	1.089	0.00702244	5	3	8	28.2	DNA.repair	M	28	4	Cp	Cp	Cp	Cp	96.5	stroma	plastid	-
	Solyc11g040110	RAD52-2	DNA repair RAD52-like protein 2, chloroplastic isoform X1 [Solanum lycopersicum, 3e-158, 100.00%], manual annotation	MLAHCTKSSLPAADAHLPTLRLPNPRRSPAPELHFGFNSFSTRTSKLQVKALDRNSNNSSTGDGVGASKNAASSPSSSVPNTNYVVPLDKASSCITRPLAEILRDLNKRIPDNIIKAGNNDNADHSTFITWYHANRMLSFYAPGWCGEVRDVIFSDNGSVTVVYRVTIRGSDGEAHRESTGTVSPGNGQYTDVVAAAEEIAFCRACARFGLGLYLYH	At5g47870	XP_004250697.1	2	3	2	0.585	0.00377238	3	0	3	35.2	not assigned.unknown	Cp	43	2	Cp	none	Cp	Cp	80.2	plastid	plastid	-
	Solyc02g079730	MRL7	Thioredoxin-like fold domain-containing protein MRL7, chloroplastic [Solanum lycopersicum, 0.0, 99.43%], manual annnotation	MVIHSALNLNFCAISSLSALKAGQHCSSCSFSNFLLPPPLKRLTCFATSKKSEEEHVSDPKNNSGSRSRKAIRSRESKVTHNEDKDSAKIFPSTIPKKPRRGRRSEAAAVEDFVRDSLEKTFASIREQNSDMMKDTENILKDRVDDDTESDESSDDEDDSSRDKKEKKMIIEEEDPNWPLDADVGWGIRASEYFDKHPIKNVignaEDGVEIDWEGEIDDCWVKEINCLEWESFAFHPSPLIVLVFERYNRASDNWKALKELEKAAKVYWSAKERLPPRTVKIDINIERDLAYALKVKESPQILFLRGNRILYREKEIRTADDLVQMIAYFYYNAKKPSCIDDAALSQQSYTSQIKKEAVEHGSIPV	At4g28590	XP_004232766.1	1	1	1	0.155	0.00099952	1	0	1	35.2	not assigned.unknown	Cp	46	5	Cp	none	Cp	N	69.5	plastid nucleoid	plastid	-
	Solyc04g016530	-	DNA-(apurinic or apyrimidinic site) lyase, chloroplastic	MLQSFKFGLYNFITSNSVGVISRIPKFQVLVSVNLTIMGSKKRPFSTSSATGKSNEQVSVAAEKGVSKENVGKSGEILVEDMGTVEKMTVPQLRVKLRSLGIPSRGTKQELVASLKTFLDSKLDDAGNGSVAQEDKVSSEESLEVAANPSKKKSRKLPSKNRNQSNVTSEVPTTRQTKRRVTKGQTEDTSFDIIVKQTEITQEMSIESNDIKGKKNVRAKRKVSSATVSAHIGVSEAADLSVNQDEPWTIFAHKKPKDGWIVYNPKTMRPPPLSKDTKHVKLLSWNVNGLRALLKLKNLCIQQLADREDFDVICLQETKLQEKDVEAIKESLHDYKNSFWTCSVSKLGYSGTAIISRIKPVSIKYGLGIPNADHDTEGRLVTVEFDNFYLLCGYVPNSG…	At2g41460	XP_004236570.2	1	5	1	0.075	0.000483639	5	0	5	28.1	DNA.synthesis/chromatin structure	Cp	59	5	Cp	none	Cp	N	99.9	plastid nucleoid	plastid	-
	Solyc11g007850	PEND	Plastid DNA-binding protein (Fragment)	MHTIKGGWVGQTFALATCNDSGGRKTRIRRSKEERKSMVETFIKKYQKSNDGNFPSLNLTHKEVGGSFYTVRELVREIIQENRVLGPAKLSPEEQNNIMFAEEYPLGSISTEPQSLSLSGETHVMSSFAPNHSMGKSEEADFGVNRQLDMMVADGLQTSTSDISERIKQSNESHIIDSESNADHQKNKDEVLHSSGINGVNADHEMFNEQMAGDSETTKETEISGKSDLLNTLSFKHQNTQVLDSTEIISESVNVSLLSGVDACRPTVENNGTYGEPISTELVVGENVDVEGGLSDLEVSKAGIPLKTSELLVEKFPLRPISKKINDLDSGLNETTSVAKTLEEIEHEHDRITSLEKAAEHITEPVDMMIADRTTEKSSKLLNEKAEAKAGEASLEIST…	At3g52170	XP_004250019.1	4	8	4	0.492	0.00317267	4	0	4	27.3.67	RNA.regulation of transcription.putative transcription regulator	_	-	4	-	none	Cp	N	79.32	plastid nucleoid	plastid	-
Post-transcriptional processes	Solyc08g077120	SOT1-1	Supressor of thylakoid formation 1; Pentatricopeptide repeat-containing protein At5g46580, chloroplastic (AHRD V1 ***- PP420_ARATH)	MAAKFSTGLDIHCSIPYTSDTKLLYGSSSSSTKSSRLSIKRFTVLCNSTSKSPKPNLDLDSSRKKPSLSEQLKPLSNTILDDPPNQARILSKPKSTWVNPTRPKPSVLSLQRQKRSSYSYNPQIRDLKNFARRLSESHFSDDAFLAVLEDIPHPPTRDNALLVLNSLRPWQKTLFFFNWIKTRNLFPLETIFYNVAMKSLRFGRQFHQIEELAFEMIDSGV	At5g46580	XP_004245879.1	4	14	4	2.162	0.0139417	5	3	8	28.1	DNA.synthesis/chromatin structure	Cp	45	3	Cp	Cp	not Cp	N	78.2	plastid nucleoid	plastid	-
	Solyc08g077140	SOT1-2	Supressor of thylakoid formation 1; Pentatricopeptide repeat-containing protein At5g46580, chloroplastic (AHRD V1 ***- PP420_ARATH)	MLNIYGSVGEKAMALFEEMSKVGIELNVMGCTCLVQCFGRAQRIDDLVKVFEVSVQRGVKPDDRLCGCLLSVVSYCKGDDADKVLACLQQANPRLVTFVKMLEDESTSYDIVKEEFRSILTNTSDDARRPFCNCLIDICRKRNRAERAHELLYLGTVYGLYPGLHTKTPEEWRLNVRALSVGAAQTAFEEWMRTLAKIVQSEEPLPEVLSANTGAGTHKFSQGLAFASHVEKFAAPFKQSEEKAGFFIATREDVVSWVHSKAAA	At5g46580	XP_004245879.1	4	9	4	0.896	0.00577787	5	3	8	28.1	DNA.synthesis/chromatin structure	S	-	5	-	none	Cp	C	99.89	plastid nucleoid	plastid	-
	Solyc09g025260	RHON1-like	Termination factor RHON1-like protein (RNA endonuclease)	MSSAIDFTLKNLPGFKSPEGRCLPCSGLSGRTVTSRGEYQQFSKVKILNLKSPYKSTSYMCSASSFSNHKRNPDFSRQNKHGFSRGRNRQNEDRDGYENIEESEMISSRNGPLLTTSNTSKFQATATPGPREKEIVELFRKVQAQLREKAAIKEEKKSEELQGKGKESETVDSLLKLLRKHSVQKGKKTSSSRSSNFVLDQPDKSNVFSEERASNLTELNSNVNHVAQESGTPFVNRPKSNFQRRSPVPRIKFQPIYHEGDKHVFDEMADDDTSKMYGSVDASDDEEHNHAGHDELAEMKLTELRAIAKSRGLRGYSKLKKLELIELLSADQV	At1g06190	NP_001334482.1	8	20	8	2.594	0.0167275	5	1	6	27.1.10.1.2	RNA.processing.plastidial RNA.RNE Complex.RHON1	Cp	24	5	Cp	none	not Cp	N	87.2	plastid nucleoid	plastid	-
	Solyc11g012670	SRV7	Suppressor of Variegation 7, Pentatricopeptide repeat-containing protein At4g16390 (AHRD V1 ***- D7MRC5_ARALY); contains Interpro domain(s) IPR002625 Smr protein/MutS2 C-terminal	MASAPSSTLSPLYESNIFCNFNSPQKFTFPLKLHSKSCIRTTQVSLQEQSQVSNPNTSQYPDRKAVSSSKSKLWVNPKSPRASELKRKSYDFRYASLMKVAESLDSCKPVEEDVSNVLAELGDKIVEQDAVVTLNNMTNAETALLAMKYFQQRLKLSKEVIVYNVTLKVLRKNKDLDRAEKVFDEMLERGVKPDNVTFSTIISCARQCNLPEKAIEWFEKLPSFGCEPDDVTYSVMIDAYGKAGNVDMALSLYDRARTEKWRIDAVTFATLIRIYGAAGNFDGCLNVYEEMKALGVKPNMTVYNSLLDAMGRARRPWQAKNIYGEMLTNGFQPSWGTYASLIRAYGRARYGEDALKIYKEMKEKGLELSVVLYNTLLAMCADVGLTDEAVNIFEEMKSS…	At4g16390	XP_004250291.1	11	32	10	2.455	0.0158311	5	3	8	35.1.5	not assigned.no ontology.pentatricopeptide (PPR) repeat-containing protein	Cp	81	2	Cp	possibly Cp	Cp	C	98.6	plastid stroma	plastid	-
	Solyc12g009980	STIC2	Nucleoid-associated protein Suppressor of Tic40 2	MASTSAFTAGISNLHSFKKPCPNANQVGMWTLSRPGCRKVLDNPRPLQICSLFGGKKDNNEQNNDAPSKAGLFGNMQNLYETVKKAQNVVQVEAVRVQKELALAEFDGYCEGELIKVTLSGNQQPIRTEITEAAMALGPEKLSLLITEAYKDAHQKSVLAMKERMSDLAQSLGMPAGLGEGFKQ	At2g24020	XP_010313819.1	8	57	8	9	0.0580367	5	3	8	35.2	not assigned.unknown	Cp	23	2	Cp	Cp	Cp	Cp	63.4	plastid stroma	plastid	plastid
	Solyc08g042050	RH3	DEAD-box ATP-dependent RNA helicase 3 (AHRD V1 **** RH3_ORYSJ); contains Interpro domain(s) IPR011545 DNA/RNA helicase, DEAD/DEAH box type, N-terminal	MASSSSIIGVSSIYQTNPSLELSRRPTATPPLSLPFSIEKSNFHVHVRLRRPFLASAVVTPTSSVLSEEAFKGIGGFGKDSLNVSESEYDSEDEVEDNESNEDELSVSKLGLPHRLVDALEKRGITQLFPIQRAVLVPALEGRDIIARAKTGTGKTLAFGIPVLKKLSTDEEMRNTQRRGRLPKVLVLAPTRELANQVEKEMKESAPYLNTVCIYGGVSYATQQNALSRGVDVVVGTPGRLIDLINNNTLKLGEVEYLVLDEADQMLAVGFEEDVEVILEKLPPQRQSMLFSATMPGWVKKLSRKYLNNPLTIDLVGDQDEKLAEGIKLYALSATSTSKRSILGDLVTVYAKGGKTIVFTQTKRDADEVSMALSNSISSEALHGDISQHQRERTLNGFR…	At5g26742	XP_004244948.1	9	22	9	0.808	0.0052104	5	3	8	27.1.2	RNA.processing.RNA helicase	Cp	54	1	Cp	Cp	Cp	C	83.9	plastid nucleoid	plastid	plastid
	Solyc08g080550	RH47	DEAD-box ATP-dependent RNA helicase 47 (AHRD V1 **** C5ZVH9_9HELI); contains Interpro domain(s) IPR011545 DNA/RNA helicase, DEAD/DEAH box type, N-terminal	MPALVLTRALLLIGDSLAFRKATQFTRIAPSQGNVRFLSSSGSLTLASLGLKSEVKTVSANEKNKLQQGISTIEVPKSREKKRVSGNKQGLVKEKNPVDIMTAPFAAKSFSELGLPPLLVERLETEGFTIPTDVQAAAVPTVLKNHDVVIQSYTGSGKTLAYLLPILSRVGPLKEELPDGYETGNKIDIEAVIVAPSRELGMQIVREVEKLLGPANKKLVQQLVGGANRSRQEDALKKNKPDIVVGTPGRIAEISAAGKLPTHGCRYLVLDEIDQLLAFTFREDMKRILNADHVGRRPGARGGESNSPLVKRAARQTIMVSATVPFSVIRAARSWGCDPLLIQANKVVPLESVTPSGSVNIPGTPSTTDSSSSVQPMPDVQSLPPNLQHYYTITRIQHK…	At1g12770	XP_004245636.1	1	2	1	0.08	0.000515881	2	0	2	27.1.2	RNA.processing.RNA helicase	M	45	3	Cp	ER	Cp	G	51.6	plastid nucleoid	mitochondrion	-
	Solyc04g072036	BSF	BSF, PetB/PetD Stabilizing factor	MPLLLLPCKSFSIFNPILPLNTSVIYNTAIQFSGFSLSPKYPLPRTPKSSKNLSIHWNYQINLPTHVLFCSKNEIFEEFRTTQLAELPESEELELHNKPYLKQIDNGVVSDVEEDQKKVSKDEVLEPFYKLFKPIESNEEESDIEQEEEVHPVVEESKKVSVEYYEPKPGDLVVGVVVSGNENKLDVSIGADLLGTMLTKDVLPLYDKEIGYLLCDLEKDAEEFLVRGKMGILSYDDAVSGESTPGKPVVEPGTVLFAEVLGRTLSGRPLLSTRRLFRRIAWHRVRQIKQLNEPIEVKITEWNIGGLLTRIEGLRAFLPKAELMNRVNSYTELKENVGRRINVLITRINEETNDLILSEKEAWQMLNLQEGTLVEGTVKRLFPFGAQIRLGETNRSGLL…	At1g71720	XP_004253265.1	6	13	6	0.738	0.00475901	5	0	5	29.2.1.1.3.1.1	protein.synthesis.ribosomal protein.prokaryotic.unknown organellar.30S subunit.S1	S	-	3	Cp	none	Cp	Cp	99.69	plastid nucleoid	plastid	-
	Solyc03g119450	CRS1	CRM-domain containing factor CFM3, chloroplastic/mitochondrial	MALSTAKFTQLTPQLFSSFSTPTDRPPFFLFLRRTITAGNTRTNIPRKDNRKPYRDSNSSSTPVKSNNSRSSTWLNKWPNTSSPVKHSSNSRTVESKTETRYFDENTRVGTTAIDRIVLRLRNLGLGSDDEGEGEDEEEGNLKLDSSSTMQVNGEEEKLGDLLKRDWVRPDMILEESDDEGDTYLPWERSVEEEAVEVQRGGKRTVRAPSLAELTIEDEELRRLRRIGMTLRERINVPKAGVTGAVLEKIHHSWRKNELVRLKFHEVLAHDMRTGHEIVERRTKGLVIWRAGSVMVVYRGSNYEGPSSRSQSVNEEDNALFVPDVSSDKSITKDNKSFNPVIENRNQVHPNRVQSMTEEESEFNRVLDGLGPRFEDWWGTGVLPVDADLLPQTIPGYKT…	At3g18390	XP_004235759.1	2	3	2	0.113	0.000728683	2	0	2	33.99	development.unspecified	Cp	65	5	Cp	Cp	Cp	C	69.3	plastid nucleoid	plastid	-
	Solyc04g008570	-	Pentatricopeptide repeat-containing protein At5g13770 (AHRD V1 ***- D7M5W2_ARALY); contains Interpro domain(s) IPR002885 Pentatricopeptide repeat	MWLKSTLISLKSITTHLSNDKWSIQATCMMAIATSSDWSFPPCINCKNRILKPKFCYSCKTLPFLSNIFLNSTTTLVAKSSSSCSSPVLDEKKSQKTPSKSSQVIELLDLEQIQDFSSTTNGTTSLPDSKDLNGVICSLLKDTQTQEIGYDYYEKAKGEKDFRPEKSTLKLLIRYLVNSSKWGSVFSLSKDLRTLKVLPDSSTCCRLISSCMKSRKFKIVNSFLELFIVVDQEISVLAFDSAMRGYNKLHMYSSTVVLYEKMKSARLVLDPGCYCSIMEAHSKMGNSDKVVSFFEEFESKRVESTTPQYVQVYKCLCESLGKSGRAYEALEYFRDMTKKGIQENADHSFYSIVICGFASIRDVKMAEELLEEAEGKKMLRDPALFLKLVLMYIEEGCME…	At5g13770	XP_004237182.2	1	3	1	0.072	0.000464293	3	0	3	35.1.5	not assigned.no ontology.pentatricopeptide (PPR) repeat-containing protein	Cp	77	5	-	possibly M	Cp	C	96.7	plastid nucleoid	-	-
Redox proteins	Solyc01g096480	Trx-z (PAP10)	Thioredoxin protein (AHRD V1 ***- Q6JE37_NICBE); contains Interpro domain(s) IPR013766 Thioredoxin domain	MQAASLAFHPPALRTSPSYLSSKLPHHLNYSLFKHAPSTSTLSLTQVLSRNTICKPPAVGKYVREDYLVKKLSAKEIQELIKGERNVPLIIDFYATWCGPCILMAQELEMLAVEYENNALIVKVDTDDEYEFARDMQVRGLPTLYFISPDSSKDAIRTEGLIPIQMMRDIIDNDL	At3g06730	NP_001234469.1	4	12	4	1.31	0.00844756	5	1	6	21.1	redox.thioredoxin	Cp	64	2	Cp	none	Cp	Cp	100	plastid	plastid	plastid
	Solyc02g021140	Fe-SOD3 (PAP4)	Superoxide dismutase (AHRD V1 ***- B9S4J6_RICCO); contains Interpro domain(s) IPR001189 Manganese/iron superoxide dismutase	MSWCCCNRLSTSTSSDLWRQFNIPNVGLRQKKRSVSAYYGLKTPPYKLDALEPYMSQRMVEIHWGEHHRGYVESLNKQIENNDIFYGCTMEQLIKLTYNNGNPLPEFSDAAQVWNHDFFWESMQPGGGDMPKLGFLHQIDKDFGSFTNFKDKFIEAALTLFGSGWIWLVLSREEKRLAIIKTSNAVNPLVWNDIPLIGLDLWEHAYYLDYKNDKAKYVNVFMNHLVSWDAALGRMARAQAFVNLGEPKIPVA	At5g23310	XP_004231531.1	2	10	2	1.512	0.00975016	4	0	4	21.6	redox.dismutases and catalases	M	34	5	-	none	Cp	Cp	93.1	plastid	plastid	-
	Solyc03g095180	Fe-SOD2A (PAP9)	Superoxide dismutase (AHRD V1 **** Q7YK44_SOLLC); contains Interpro domain(s) IPR001189 Manganese/iron superoxide dismutase	MAAATASATLFSPFLPSPGFHESCRSLNWRTHKKQIASKAGTVKVTAKFELNPPPYPMNALEPHMSRTTFEYHWGKHHRAYVDNLNKQIVGTELDELTLEDIILVTYNQGNLLPPFNNAAQAWNHQFFWESMKPGGGGQPSGELLKLINRDFGSFEAFVKEFKAAAATQFGSGWAWLAYKANRLDVGNASNPHPSDEDKKLVIVKTPNAINPLVWDYSPLLTIDVWEHAYYLDFRNrRNAPDYISIFMEKLVSWEAVSSRLEAAQAQAAEREKEEERKKREEEEEYQDGNEVREMYVETTDSEAD	At5g51100	XP_004235206.1	12	109	11	157.489	1.01557	5	3	8	21.6	redox.dismutases and catalases	Cp	44	2	Cp	Cp	Cp	Cp	99.6	plastid stroma	plastid	plastid
	Solyc06g048410	Fe-SOD2B (PAP9)	Superoxide dismutase (AHRD V1 **** Q7YK44_SOLLC); contains Interpro domain(s) IPR019833 Manganese/iron superoxide dismutase, binding site IPR001189 Manganese/iron superoxide dismutase	MAATASANSLTSAFLPPQGFNGSSKSLQWRTQKKQFGRKAGSATITAKFDLIPPPYPMDALEPHMSSRTFEFHWGKHHRAYVDNLNKQIDGTELDGKTLEDIILVTYNNGAPLPAFNNAAQAWNHQFFWESMKPNGGGEPSGELLELINRDFGSYDTFVKEFKAAAATQFGSGWAWLAYKPEDKKLALVKTPNAENPLVLGYTPLLTIDVWEHAYYLDFQNrRNAPDYISIFMEKLVSWEAVSIRLKAASA	At5g51100	NP_001233789.2	5	75	4	25.827	0.166546	5	3	8	21.6	redox.dismutases and catalases	Cp	58	2	Cp	Cp	Cp	Cp	100	plastid stroma	plastid	plastid
Chaperones	Solyc03g118340	CLPC2	ATP-dependent clp protease ATP-binding subunit (AHRD V1 **-* Q85G08_CYAME); contains Interpro domain(s) IPR013093 ATPase associated with various cellular activities, AAA-2	MMARALVQSTNILPSVAGERAGQFNGSRKDQRTVRMLCNVKCCSSRLNNFAGLRGCNALDTLLVKSGETLHSKVAAATFVRRPRGCRFVPKAMFERFTEKAIKVIMLAQEEARRLGHNFVGTEQILLGLIGEGTGIAAKVLKSMGINLKDARVEVEKIIGRGSGFIAVEIPFTPRAKRVLELSLEEARQLGHNYIGSEHLLLGLLREGEGVAARVLENLGADPTNIRTQVIRMVGESSEAVGASVGGGTSGLKMPTLEEYGTNLTKLAEEGKLDPVVGRQAQIERVTQILGRRTKNNPCLIGEPGVGKTAIAEGLAQRIANGDVPETIEGKKVITLDMGLLVAGTKYRGEFEERLKKLMEEIKQSDEIILFIDEVHTLIGAGAAEGAIDAANILKPALA…	At5g50920	NP_001316890.1 D'Andrea et al (2018)	42	422	10	23.484	0.151437	5	3	8	29.5.5	protein.degradation.serine protease	Cp	43	4	Cp	possibly Cp	Cp	C	69.2	plastid stroma envelope-inner-peripheral-stromal-side	plastid	plastid
	Solyc12g042060	CLPC1	ATP-dependent clp protease ATP-binding subunit (AHRD V1 **-- Q85G08_CYAME); contains Interpro domain(s) IPR013093 ATPase associated with various cellular activities, AAA-2	MARALVQSTSIPSSVAGERTTKFNGSGKTKRAVTMLCNAQSSSLTLRDFTGLRGCNAIDTLVRSGQTLQSKVAAATYVRRPRGCRFVPKAMFERFTEKAIKVIMLAQEEARRLGHNFVGTEQILLGLIGEGTGIAAKVLKSMGINLKDARVEVEKIIGRGSGFVAVEIPFTPRAKRVLELSLEEARQLGHNYIGSEHLLLGLLREGEGVAARVLENLGADPSNIRTQVIRMVGESNEAVGASVGGGTSGQKMPTLEEYGTNLTKLAEEGKLDPVVGRQPQIERVTQILGRRTKNNPCLIGEPGVGKTAIAEGLAQRIANGDVPETIEGKKVITLDMGLLVAGTKYRGEFEERLKKLMEEIKQSDEIILFIDEVHTLIGAGAAEGAIDAANILKPALARG…	At5g50920	NP_001332862.1 D'Andrea et al (2018)	51	631	19	63.223	0.407695	5	3	8	29.5.5	protein.degradation.serine protease	Cp	36	3	Cp	Cp	Cp	C	74.2	plastid stroma envelope-inner-peripheral-stromal-side	plastid	plastid
	Solyc01g105340	DJA6	Chaperone protein dnaJ A7A, chloroplastic-like	MLANQKSKAVTYRKLARSYHPDVNKEPGAEQKFKEISYEVLSDDEKRSIYDKYGEAGLKGAGAGMGDFSFDLFESLFDGFGGMGGMGGMGGRGSRSRATEGEDQGYNLVLNFKEAVFGVEKEIEISRLETCGTCDGSGAKPGTKPSTCNTCGGQGQVVSSARTPLGVFQQVTTCSSCGGTGEISTPCGTCNGDGRVRKSKRISLKVPPGVDSGSRLRVRSEGGRRGGPPGDLFVMIEVLPDPVLKRDDTNILYNCKVSYIDAILGTTMKVPTVDGMVDLKIPAGTQPGTTLVMAKKGVPFLSKPNMRGDQLVRVQVEIPKRLSSEERKLIEELANLNKPKAATNSKR	At2g22360	XP_004230549.1	8	36	8	2.981	0.019223	5	1	6	20.2.1	stress.abiotic.heat	M	101	4	-	possibly M	Cp	M	60.03	thylakoid	plastid	-
Kinases	Solyc05g012100	FLN2	Fructokinase-like protein 2 IPR011611 Carbohydrate_purine kinase	MAALSFSFFSTLSRQHLHWNFYPNLKVMQLQDLKLKNKWVLMAVSKGGTTEGIPEELSETEVVGAGKKTGRTSKQAPVLSRRKKVVEFSNDEEAENTSGSIEEPKKTQRRTRKKKDTVESSIGDSISDVEGNVTDEDAVTEPESSGKPKKTRRTRKKKEIKESSFEDSVLGVEGNVTDEEGSPTSRSSEEPVEKRKRTAKKAASSSSSLEKEPTQKATRGRRKKVRNLEDEGSQSELSDIEEELHVANVDADNEEELDFDIDVGEDISFTYGWPPLVCCFGAAQHAFVPSGRPSNRLVNADHEWHERMKDVMWDPEKFIRAPGGCSSNVAVALASLGGKVAFMGKLGDDDFGQSLVYFMNINKVQTRSVRLDSKRATAITHMKIGKRGGLRMTTTKACA…	At1g69200	XP_004239035.1	2	4	2	0.212	0.00136709	4	0	4	2.2.1.1	major CHO metabolism.degradation.sucrose.fructokinase	M	82	4	-	possibly M	Cp	Cp	79.55	plastid nucleoid	plastid	-
	Solyc09g011850	FLN1 (PAP6)	Fructokinase-like protein 1 (AHRD V1 ***- D9IWP2_SOLTU); contains Interpro domain(s) IPR011611 Carbohydrate/purine kinase	MATIHFLPQSLPHHHSHNSLNPTIFFSSSKFPYRTNPPKSTTNNADHPTTTQEPPTPSRRGRKKSSTPTTSKKSRTPKDSNFDINIAESNTQMEEIDDYDDGVDFPYPNPPLVCCFGAAQKEFVPTVRVSPEQMDKDKYSEWKMLQWNPPEFVRAPGGPPSNVAISHVRLGGRAAFMGKVGSDELGQEMVLLMNKEKVQTRAVKFSDSMRTGCSYMEIKFKDGKMRVEKVQDSAEDSLLSSELNLDVLKEARMFHFNSEVLTSSSMRSTLFKAITLSKKFGGLVFFDLNLPLPLWRSRDETRDLIKEAWQQANIIEVSRQELEFLLDEEHYERKRNYRPQYFAENYEQTKQRRNYYHYTPEEIAPLWHDGLKLLFVTDGTLRIHYYSPSFDGVVVGTED…	At3g54090	XP_004246362.1	5	14	5	1.683	0.0108529	4	0	4	2.2.1.1	major CHO metabolism.degradation.sucrose.fructokinase	Cp	67	1	Cp	Cp	Cp	C	60.7	plastid nucleoid nucleus cytosol	plastid	plastid
Diverse processes	Solyc10g008740	CHLI	Magnesium chelatase ATPase subunit I (AHRD V1 **** Q53RM0_ORYSJ); contains Interpro domain(s) IPR011775 Magnesium chelatase, ATPase subunit I	MASLLGTSSSSSAAAILASTPFTSRSSKSAALSLFPSSGHSQGRKFYGGIRLPVKKGRSQFHVAISNVATEISPAQEQAQKLAEDSQRPVYPFPAIVGQDEMKLCLLLNVIDPKIGGVMIMGDRGTGKSTTVRSLVDLLPEIKVISGDPFNSDPDDQEVMSAEVRDKLRKGEQLPVSLTKINMVDLPLGATEDRVCGTIDIEKALTEGVKAFEPGLLAKANRGILYVDEVNLLDNADHLVDVLLDSAASGWNTVEREGISISHPARFILIGSGNPEEGELRPQLLDRFGMHAQVGTVRDAELRVKIVEERGRFDKNPKEFRESYKGEQEKLQSQITSARSGLSSVTINADHDLRVKISKVCAELNVDGLRGDIVTNRAARALAALKGRDKVTPEDIATV…	At4g18480	XP_004248139.1	12	130	12	9	0.0580367	5	3	8	19.1	tetrapyrrole synthesis.ALA dehydratase	Cp	51	1	Cp	Cp	Cp	Cp	100	stroma	plastid	-
	Solyc12g037970	-	Peptidyl-tRNA hydrolase family protein (AHRD V1 ***- D7KGE1_ARALY); contains Interpro domain(s) IPR001328 Peptidyl-tRNA hydrolase	MKVACVISSTASSATVLCRCGRSLFSSFSVAKTLNSSSFRRGWMSNTAAAGSLYQISCSMTTQTSPPDTPAIIAPLPEKPKPKPQPWLIVGLGNPGKRYAGTRHNVGFEMIDTIADAEGISMGSVSFKAQFGKGFIGDVPIMLAKPQTFMNASGESVGAIVSYYKIPLKQVLVVFDDLDLPFAKLRLLPKGGHGGHNGMRSIMNHLKGNRDFPRLRIGIGRPPGKMDPASFVLRAFNRQEREELDFTLQNGLEAMRILVLEGFDKSATFVNSSKPLTV	At1g18440	XP_025884433.1	1	1	1	0.233	0.0015025	1	0	1	35.1	not assigned.no ontology	Cp	57	2	Cp	possibly Cp	Cp	Cp	99.4	plastid nucleoid	plastid	-
	Solyc03g114450	CAS	Calcium sensing receptor (AHRD V1 ***- C7BCU7_LIQFO); contains Interpro domain(s) IPR001763 Rhodanese-like, thylakoid membrane	MALRASATAKSPLPLPPPPPSSSSSTSSPPKVFSLPKLTQKPVSVSFSTSTALFLFPLFTATHEARAINLPKEDIVSSLNQVESVVNQAQEVGSNIFDTVSGVignaPVIEFVKPGIDAALPLVKQAGEEVLKNASPVISDATKKAQEAMQSAGMDSEPVMTAAKTVVDAAQQTSKVIEGAKPIATSTVETISSTDPAVIAVAGGTLFLAYLLLPPVFSALSFSFRGYKGELTPAQTLDNMCSKNYVLIDIRTEKDKDKAGIPRLPSSAKNKMIQIPLEDLPSKVKSLVRNPKKVEAEIVALKISFLKKINKGSNIVIMDSYSDSAKTVAKSLTSFGFNNCWIMTDGFSGGKGWLQSRLGTDSYNFSFAEILSPSRVIPGRRFGTTGTVKLLSD	At5g23060	XP_004236097.1	2	4	2	0.179	0.00115428	3	1	4	35.2	not assigned.unknown	Cp	76	2	Cp	Cp	Cp	Cp	99.5	thylakoid-integral mitochondria	plastid	plastid
	Solyc07g043600	-	Pentatricopeptide repeat-containing protein At3g59040 (AHRD V1 ***- D7LWA0_ARALY); contains Interpro domain(s) IPR002885 Pentatricopeptide repeat	MPQTMMIFLKPFISPSSSSLWSKSNSGENSLKTNVKICKRAEVVCQGMLTPRKFMQKRRKVEVFKSAEDEADQKNWRKMMNEIEEAGSAVSVLRTQRDKNQALPKNLVLGSLVRFKQLKKWNLVSEILEWLRTQHWWDFNEMDFLMLITAYGKQGDFSKAERILGYMNKKGYPANVISHTALMEAYGKGGQYAKAEAIFRRMQTSGPEPSAITYQIILKIFVEGDKFNEAQDVFEALMDMDAPPLKPDQKMFHMMIYMYKKAGKYEKARHLFSLMTERGIPQNTVTYNSLMSFETNYKEVANIYDQMQRAGLQPDVVSYALLISAYGKARREEEALAVFEEMLDAGVRPTQKSYNILLDAFAISGMVEQARTVFKSMRRDRCSPDLCSYTTMLSAYINA…	At3g59040	XP_004243629.1	2	2	2	0.202	0.0013026	2	0	2	35.1.5	not assigned.no ontology.pentatricopeptide (PPR) repeat-containing protein	Cp	45	1	Cp	Cp	Cp	C	97.4	plastid nucleoid	-	-
	Solyc09g098530	-	Uncharacterized protein (AHRD V1) possible phosphoribosylformylglycinamidine synthase	MNLSLYTISLSPSNSIRFTSPKRCCHYHVISRRVSPSPYRRRHLRRRRFPFLKKFSPEDTPPSDQNLHFVLTVDNLPTKSFYSIKDLIHLKLREFLHSGRAAIEDLQTLIRIDTDAGRVSFSCTRSTVKFLATLLVSTFLLIFTLRAILNLVRRIPLNTGNNNVELVYKRDRSLGGREVLVAKNETPTLDRKKPNVLDRDEGNSNWDLDTPISFSRRRKKKSSVEQLPKWWPVSTSGSDQVGTENQEEYQRMADRLIRAILDNRMTGKDILADDIIQLRRIGRISNVKVSFDTENARDTLFRVAVDFILNYCESTASQSAFVLIDGEEAQNFVAGLADNVGLESTRAARMVSAAVAARTRSRFLQAWALEIQGKHSEAVVELFKICVIHQIFPPEEFSP…	At2g43235	XP_004247979	1	2	1	0.093	0.000599712	2	1	3	35.1	not assigned.no ontology	Cp	30	1	Cp	Cp	Cp	N	35.3	plastid nucleoid	-	-
	Solyc09g018890	NDHV	Uncharacterized protein	MATTGGSISLSSFPSSSFCRKPKPILPADSLELRHLKTCKNLVCFAAQESSSLTVAEEKKESQTAEEKTKAKAPDKPLHQMMEENIIPSLKATLESQNDILELELSFSENKLEGSFLKKGNPYSFWAFFPDGLTGPKGFSLSSYGSGASTVEPFLVDEKKITAKHVVFWVEKRLAAQGIIPVWKE	At2g04039	XP_004246251.1	5	31	5	9	0.0580367	5	3	8	35.2	not assigned.unknown	Cp	55	2	Cp	Cp	Cp	Cp	98.4	plastid	plastid	-
A Names of tomato proteins were based on the literature, NCBI annotation (identified in BlastP searches), and/or SolyGenomics descriptor. In a small number of cases, tomato protein names were assigned based on NCBI annotations and the Arabidopsis homolog.
B Some Sol Genomics descriptors were updated when NCBI annotations and Arabidopsis gene annotations were aligned.
C Target P's subcellular locations are: chloroplast (Cp), mitochondria (M), secretory (S), and no predicted location is indicated by a dash (-).
D ChloroP was used to predict the presence of a chloroplast transit peptide (Y) and the lack of a predicted transit peptide is indicated with a dash (-).
E Predotar's predicted subcellular locations were: chloroplast/plastid (Cp),endoplasmic reticulum (ER) or mitochondrion (M). For proteins with localization predictions that were less clear, Predotar provided categorized of possibly Cp, M and ER. Proteins with unresolved locations or that did not have a homolog detected by Predotar are indicated with a dash (-).
F WoLF PSORT's and YLoc's predicted subcellular locations were: chloroplast/plastid (Cp), cytosol (C), cytoskeleton (Cy), endoplasmic reticulum (ER), extracellular (EX), golgi apparatus (G), mitochondrion (M), nucleus (N), peroxisomes (P), plasma membrance (PM), and vacuole (V). Proteins with no chloroplast location in WoLF PSORT are indicated by not Cp.The number of proteins predicted to be in t…
											2.32368

## Sheet: S6C-Transcription factors
Table S6C. Transcription factors and regulators not known to be associated with the nucleoid
Gene and protein descriptors						ProteomicsA					Times detected			Bin codes		Algorithms								Databases
Tomato Gene ID	Gene nameB	DescriptionC	Protein Sequence	Arabidopis homolog	Tomato proteinB NCBI accession	Peptides	PSMs	Unique Peptides	emPAI	Mol%	Acetone samples	Gel samples	Total	Bincode	Name	TargetP D ver.1	Transit peptide length	TargetP (reliability class)	ChloroP E	Predotar F	WoLF PSORT G	YLoc G	YLoc % Confidence	PPDB	SUBA4	plprot
Solyc03g097360	BolA4	BolA-like IPR002634 BolA-like protein	MTKALFVRPNVAALCIRRLSCSVQPRLSAMVKCYSIAVRSYRPMKQLSHIGLKFEAFAGHRSFSIRATSDTGSSSFDSPLMQSMEKKIKEQLDADTVVVKDAYGDGRHVSIDVIATAFEGQSAVNRQRMVYKAIWEELQNTVHAVDQMTTKTPTEAAAGK	At5g17560	XP_004235350.1	3	16	3	1.512	0.00975016	5	3	8	27.3	RNA.regulation of transcription	M	26	4	-	M	Cp	Cp	66.29	plastid stroma	plastid	-
Solyc01g108910	CBP1	CCG-binding protein 1	MMLQSMALNSLSSTSLVGVNNELHSSRFQVNSSTIRCCSRSHAYIPKLEPFSRTKFDRVFKDPPLIEKSENELADYCSVLEGDDSYSCWQAYFELKDLEKEAPKEEVERLILQAGGVKTLIGCLHGVSDMHKAKKESKESAKPVNLDAQRAGGLCPIPDGLPKSREELEEEEKARMPDSPYTKLLRAKGTHPVWY	At2g15890	XP_004230833.1	6	27	6	7.111	0.0458554	5	3	8	35.2	not assigned.unknown	Cp	36	2	Cp	Cp	Cp	Cp	65.3	-	plastid	-
Solyc03g120840	TINY-like	Ethylene-responsive transcription factor (TINY-like) (AHRD V1 *-*- ERF78_ARATH); contains Interpro domain(s) IPR001471 Pathogenesis-related transcriptiol factor and ERF, DNA-binding	MAEVEVQSSEADSSNTTSSVSSSSSSSLSVNSMHKSVFDSSNKLPEEKKRRTKGTKKQKSINNNSESRHQIYRGVRMRSWGKWVSEIREPRKKSRIWLGTYPTAEMAARAHDVAAVSIKGNSAILNFPHLIDSLPRPLSKSPRDIQAAAALAASMRDPPSSSSSVSSSITTTISAGSEELCEIIELPNLEESDDSKTDLTLSESVEGLLYSPWWANADHSTDFCGYFLEQSAAGAGESLISCSFETLKWAC	At5g11590	XP_004235656.1 Lu et al 2016	1	1	1	0.468	0.00301791	1	0	1	27.3.3	RNA.regulation of transcription	Cp	53	2	Cp	none	not Cp	N	100	-	-	-
Solyc04g071420	MRL7-like	MRL7-likeThioredoxin family protein IPR012336 Thioredoxin-like fold	MDEDERREWRRKIRDVIKMSPDVEEEVDPVERRQKMQKLLADYPLVVDEEDPDWPEDADGRGFNLDQFFNKISIKNVKKDDDENDDDNELVWQDDDYIRPVKDLTTAEWEETVYKDISPLIVLVHNRYKRPKENEMARDELEKAIHIIWNCRLPSPRCVAIDAVVEVDLVSALKVSVFPELIFTKAGKILYREKVSRTADELSKMMAFFYYGAAKPPCLSSIENSQELIPTI	At2g31840	XP_004237791.1	5	8	5	2.162	0.0139417	5	3	8	35.2	not assigned.unknown	-	-	2	-	none	Cp	N	99.47	plastid stroma	-	-
Solyc08g061140	OCP3	Over-expression of cationic peroxidase (NCBI), Homeobox transcription factor (ISS) (AHRD V1 *-*- Q018M5_OSTTA); contains Interpro domain(s) IPR001356 Homeobox	MASSSTTLGISIRLGCSSNEHLMLVHPRSRTNIALLFHSYSSRLVTFSRRRNNSAITSSNKKKKSPPRKDTEEVGDIDEDAFEALFQLLEEDLKNDELSLDDDDITEEDLAKLERELEEALKDDELLGEIDSIANENTESSMAKDEEAVAEDANGDDDDEDVDMLVKLKNWQLKKLAYALKKGRRKLNIKNLAADLCLDRAVVLEMLRNPPPNLVLLSAALPDEPVPRMLEAASKPLETVPIEMSDAVKPDAKVETPVHVMQSNWSAQKRLKKVQLETLEQVYRRSKRPTNAMISSIVHVTNLPRRRVLKWFEERRSEEGVPAHRLPYQPSSISE	At5g11270	XP_004245032.1	1	2	1	0.194	0.00125101	2	0	2	35.2	not assigned.unknown	Cp	57	1	Cp	Cp	Cp	N	100	-	-	-
Solyc01g009080	-	FHA domain containing protein (AHRD V1 ***- B6TP39_MAIZE); contains Interpro domain(s) IPR000253 Forkhead-associated	MELTTTSQSISYANLPKIPSFFPSRVTISSSNSINFLGYNCITKKIKCSARQLRHFGPIYASMVESNSTNGSVSWILEFIGDGDTRHIGSPTAKPRSLEIPSGAVIVGRVADKADVVIPVPTVSAIHARLQNMEDYLVVTDLDSTNGTFIGEKRLVPGVAAAALPGSLVTFGDTNLAIFRVAKFEKMETNASEVEEEEPSST	At2g21530	XP_004228475.1	4	35	4	20.544	0.132478	5	3	8	35.1	not assigned.no ontology	Cp	60	3	Cp	none	Cp	Cp	99.8	thylakoid-peripheral-stromal-side plastid stroma	plastid	plastid
Solyc01g107330	-	SWIB/MDM2 domain protein (AHRD V1 ***- D6VG39_9BURK); contains Interpro domain(s) IPR019835 SWIB domain	MAVSLGLFSVFSTGVTASFAKSDSFSSVRLASPLAAHHVNNLRTVRTVTFATASKPVAEPKKREPRGIMKPRRVSPEMQAFLGGMSEVPRTQALKLIWAHIKANDLQDPQNKKVIICDEKLKTIFGGKERVGFLEIAGLISPHFLK	At2g14880	NP_001308625.1	2	13	2	0.995	0.00641628	5	2	7	35.1	not assigned.no ontology	Cp	57	2	Cp	Cp	Cp	Cp	99.5	-	plastid	-
Solyc02g085290	-	Maf-like protein expressed IPR003697 Maf-like protein	MAPKNLSFKIILGSSSMARRKILADMGYEFTVMGADIDEKSIRKDEELVIALAEAKADAIMSRLKTTDQLDENTHSTLLITADTVAVYEGIVREKPSSKEEARQFIKSYSGGQATVVGSVVVTNLTKGIRKGAWERSEVYFHDIPDEIIDSLIEEGIILNVAGGLMLEHPLTLPFVDTLIGTADSVMGLPRNLTEKLIEEAL	At5g66550	XP_004232406.1	4	33	4	13.678	0.0882028	5	3	8	35.1	not assigned.no ontology	S	-	5	-	possibly M	Cp	C	78.9	plastid	plastid	-
Solyc05g010070	-	Zinc finger family protein (AHRD V1 *--- B6TGI7_MAIZE); contains Interpro domain(s) IPR007853 Zinc finger, Zim17-type	MAFSITGNSKIFHNFNSCSSLSVTCTKTHVPICSLQFPSSFRSNSYRFCIKSTRSSTIYGKRRASEHLFRLPVISCVVEDSSETQPDAVNSSASSDSSKEAVFDMKLPRRSLLATFTCNACGARSQRLINRLAYERGTVFIQCSGCSQYHKLVDNLGLVVEYNFKEEISMDPDADQD	At1g68730	XP_004238981.1	1	1	1	0.259	0.00167017	1	0	1	27.3.67	RNA.regulation of transcription	Cp	75	1	Cp	Cp	Cp	C	45.4	-	-	-
Solyc08g066640	-	Possible Transcriptional regulator -UPF0082 protein yeeN (AHRD V1 **-- YEEN_SALPA); contains Interpro domain(s) IPR002876 Protein of unknown function DUF28	MVYSSSSIRAFGSLLCRISNGVYLKPHHSSTLRSIFLLSGNFSSSSSYSSSDIKVLPLELQSSNSVRKIWTSSPLCMGRRSCKIAGRKTAQDLKKAKLYSKIGKEIVSAVKKGGPSPISNTALAALIEKVKELDIPKDIVDRNVKRASEKGQEAFIEKIYEVYGYGGVGIIIEVLTDKVNRSVAAVREVVKDNGGKMADPGSIMFKFQRARVANVKVTDVDRDQLLTIALDAGAEDIIEPSMDEYDTEADSSERVYKVVSSAENYPVILSKLQEEGIKFKPDNGSELLPTTPIEVDDEAMELNKELMSKLLELDDVDAVYTDQKY	At2g25830	XP_004245165.1	1	1	1	0.155	0.00099952	1	0	1	35.1	not assigned.no ontology	Cp	75	4	Cp	Cp	Cp	Cp	72.7	plastid stroma	plastid	-
A Proteins were identified by acetone preparations and/or the gel method. For emPAI and Mol% calculations, only the data from the acetone prepartions were used. Proteins identified solely by the gel method have data for the number of peptides, PSMs and unique peptides.
B Names of tomato proteins were based on the literature, NCBI annotation (identified in BlastP searches), and/or SolyGenomics descriptor. In a small number of cases, tomato protein names were assigned based on NCBI annotations and the Arabidopsis homolog.
C Some Sol Genomics descriptors were updated when NCBI annotations and Arabidopsis gene annotations were aligned.
D Target P's subcellular locations are: chloroplast (Cp), mitochondria (M), secretory (S), and no predicted location is indicated by a dash (-).
E ChloroP was used to predict the presence of a chloroplast transit peptide (Y) and the lack of a predicted transit peptide is indicated with a dash (-).
F Predotar's predicted subcellular locations were: chloroplast/plastid (Cp),endoplasmic reticulum (ER) or mitochondrion (M). For proteins with localization predictions that were less clear, Predotar provided categorized of possibly Cp, M and ER. Proteins with unresolved locations or that did not have a homolog detected by Predotar are indicated with a dash (-).
G WoLF PSORT's and YLoc's predicted subcellular locations were: chloroplast/plastid (Cp), cytosol (C), cytoskeleton (Cy), endoplasmic reticulum (ER), extracellular (EX), golgi apparatus (G), mitochondrion (M), nucleus (N), peroxisomes (P), plasma membrance (PM), and vacuole (V). Proteins with no chloroplast location in WoLF PSORT are indicated by not Cp.The number of proteins predicted to be in t…

## Sheet: S6D-DNA binding proteins
Table S6D: DNA-binding proteins (not transcription factors or chromatin remodeling)
Gene and protein descriptors							ProteomicsA								Bin codes		Algorithms								Databases
Category	Tomato Gene ID	Gene nameB	DescriptionC	Protein Sequence	Arabidopis homolog	Tomato proteinB NCBI accession	Peptides	PSMs	Unique Peptides	emPAI	Mol%	Acetone samples	Gel samples	Total	Bincode	Name	TargetP D ver.1	Transit peptide length	TargetP (reliability class)	ChloroP E	Predotar F	WoLF PSORT G	YLoc G	YLoc % Confidence	PPDB	SUBA4	plprot
Chromatin, replication, recombination & repair	Solyc01g079110	H3-2 like	Histone H3 (AHRD V1 ***- D8L9K7_WHEAT); contains Interpro domain(s) IPR000164 Histone H3	MARTKQTARKSTGGKAPRKQLATKAARKSAPATGGVKKPHRFRPGTVALREIRKYQKSTELLIRKLPFQRLVREIAQDFKTDLRFQSSAVAALQEAAEAYLVGVFEDTNLCAIHAKRVTIMPKDIQLARRIRGERA	At4g40030	XP_004229367.1	2	11	0	2.162	0.0139417	5	1	6	28.1.3.2.3	DNA.synthesis/chromatin structure.histone.core.H3	Cp	53	3	Cp	none	Cp	N	100	-	-	-
	Solyc04g081150	H3.2-like	Histone H3 (AHRD V1 ***- A8MRL0_ARATH); contains Interpro domain(s) IPR000164 Histone H3	MARTKQTARKSTGGKAPRKQLATKAARKSAPTTGGVKKPHRYRPGTVALREIRKYQKSTELLIRKLPFQRLVREIAQDFKTDLRFQSHAVLALQEAAEAYLVGLFEDTNLCAIHAKRVTIMPKDIQLARRIRGERA	At4g40030	XP_004229367.1	2	4	0	1.154	0.00744159	2	3	5	28.1.3.2.3	DNA.synthesis/chromatin structure.histone.core.H3	Cp	24	4	Cp	none	Cp	N	100	-	-	-
	Solyc06g074780	H2B.1-like	Histone H2B.1-like	MAPKTGGKKPAEKKPVEEKTVEEVPAEKKPKAGKKLPKDAAVDKKKKKAKKSIETYKIYIFKVLKQVHPDIGISSKSMGIMNSFINDIFEKLAQEASRLARINKKPTITSREIQTAVRLVLPGELAKHAVSEGTKAVTKFTSN	At5g59910	NP_001352394.1	3	11	0	0.874	0.00563601	3	0	3	28.1.3.2.1	DNA.synthesis/chromatin structure.histone.core.H2A	-	-	1	-	none	not Cp	N	99.92	-	nucleus	-
	Solyc02g081910	-	DNA topoisomerase IPR005733 DNA topoisomerase I, bacterial-type	MALVQQLLTTASTSCRSIMLQNRTLHNYQANCLQCSTFATVDSFEKMSRKARICCGIRARQPRNLRVVSQQKIHPLRSYYTNEPGSSSAFSVLQLSKEGFPSTPMPIIFSFRPFGGIGSRSYNTDGKMHFSRDARAIADKGSGGAKVFSDGNKTFFKNLKNHSERSNELAVHRRLSDKVTEKGTPNSKVSASKNVDLVISKDTPVKTDEKDVNLDISGIPLGNNGKPTSTGSEKTKKQSRSKKDKNVSSATVDQPKASKTRRAKKPSPAKDEESPAVSEISSPVHSSSVGPADNVSMKVDLAQVKRTSPRKRKPTKVSNSVAELNGATVVPSDSKLVTDKSSDVSSKSKPPGQKKWPKLYPPTAKSVLVVESVTKARVIQGYLGDMFEVLPSYGHVRDL…	At4g31210	XP_010316521.1	1	1	1	0.038	0.000245044	1	0	1	28.1	DNA.synthesis/chromatin structure	M	38	5	Cp	Cp	Cp	N	95.6	plastid nucleoid	plastid	-
	Solyc05g014690	RECQ-like	ATP-dependent DNA helicase (AHRD V1 *-** A0Y2E9_9GAMM); contains Interpro domain(s) IPR004589 DNA helicase, ATP-dependent, RecQ type	MDSDADSDGSHVSSTPPRHPLPPPQFPSRRALLATAKSRTQPKNTSTISSKFSRPMLRPKISTKKPKKSKDDTTIQTRQNLSDLPVHIHPNDTVSSEAPPSGGSCNSKFASSSKTQETRIQNPSSPPKSSDLPFQIHRSVVLSHDNSSGEVLPASGLCLPKFASFLKTRKTILNFEPVEAGSIDPQLVQVNEKEAVDSCCRAKAVRKYPNLIGSNVSSLSSLPVKKVKCANEGNFVRLNINGYGKKFASKFKRRNFNSSSGKKFYRRWKKKVRVEGKEGENGLFDEEGLVVEVKGRGERLGFDAELIEEAVMGVRNEASDENLLRLLKLTYGYDSFRDGQLETLKMVLSGKSTMLVLPTGAGKSLCYQLPAMVLQGVTVVISPLVSLMIDQLKQLPAAV…	At1g27880	XP_010320976.1	1	1	1		0	0	1	1	28.99	DNA.unspecified	Cp	60	2	Cp	-	N	N	1	-	-	-
	Solyc10g081050	-	Phage-related exonuclease (AHRD V1 *-*- C6ADF2_BARGA); contains Interpro domain(s) IPR017482 Putative phage-type endonuclease	MSNACVSRFSSIQKTAVPFPGRSYHGIVFLRNFSTLTAPCISPSIPLSYPPPSVVSVACLTQSDAPQRSEEWFALRKDKLTTSTFSTALGLWKGNRRYELWHEKVFAPEVQLLPSPSRSAMDWGVLMEAVAIERYKSITGRDVSSLGFAVHSDERLDWVGASPDGLLGSLPGGGILEVKCPYNKGKPEKGLPWSTMPFYYMPQVQGQMEIMDRDWVDVYCWTPNGSAIFRVYRERSYWELMHGILWEFWWDNVVPAREALIMGNEEGATAYKPTSTHKKTGLVISRSLKLAGESKMLCRDIAGHIEFFR	At1g67660	NP_001316884.1	2	6	2	0.425	0.00274062	5	0	5	35.2	not assigned.unknown	Cp	53	4	Cp	possibly Cp	Cp	Cp	98.6	-	-	-
Other DNA-binding proteins	Solyc11g007850	-	Plastid DNA-binding protein (Fragment)	MHTIKGGWVGQTFALATCNDSGGRKTRIRRSKEERKSMVETFIKKYQKSNDGNFPSLNLTHKEVGGSFYTVRELVREIIQENRVLGPAKLSPEEQNNIMFAEEYPLGSISTEPQSLSLSGETHVMSSFAPNHSMGKSEEADFGVNRQLDMMVADGLQTSTSDISERIKQSNESHIIDSESNADHQKNKDEVLHSSGINGVNADHEMFNEQMAGDSETTKETEISGKSDLLNTLSFKHQNTQVLDSTEIISESVNVSLLSGVDACRPTVENNGTYGEPISTELVVGENVDVEGGLSDLEVSKAGIPLKTSELLVEKFPLRPISKKINDLDSGLNETTSVAKTLEEIEHEHDRITSLEKAAEHITEPVDMMIADRTTEKSSKLLNEKAEAKAGEASLEIST…	At3g52170	XP_004250019.1	4	8	4	0.492	0.00317267	4	0	4	27.3.67	RNA.regulation of transcription	-	-	4	-	none	Cp	N	79.32	plastid nucleoid	plastid	-
	Solyc11g065620	SIR	Sulfite reductase (AHRD V1 **** O82802_TOBAC); contains Interpro domain(s) IPR011787 Sulphite reductase, ferredoxin dependent	MTTSFGAAINIAAVDDPNPKLQIQRFNGLKSTSNSILLSRRIHRSFSHSNSTSIVRAVSTPAKPAAVEPKRSKVEIFKEQSNFIRYPLNEEILNDAPNINEAATQLIKFHGSYMQYNRDERGSRSYSFMLRTKNPGGEVPNKLYLVMDDLADQFGIGTLRLTTRQTFQLHGVLKKDLKTVMSTIIHNMGSTLGACGDLNRNVLAPAAPFAKKDYVFAKQTADNIAALLTPQSGFYYDVWVDGEKFMSVEPPEVVKARNDNSHGTNFPDSPEPIYGTQFLPRKFKIAVTVPSDNSVDIFTNDIGVVVVSDEDGEPQGFNIYVGGGMGRTHRMETTFPRLAEPLGYVPKADILYAVKAIVVTQRENGRRDDRRYSRLKYLLSSWGIEKFRSVTEQYYGKKF…	At5g04590	NP_001266248.1	19	117	19	6.43	0.041464	5	3	8	14.3	S-assimilation.APR	Cp	56	1	Cp	possibly Cp	Cp	Cp	94.8	plastid stroma	plastid	plastid
	Solyc09g065840	-	Single-stranded DNA binding protein (AHRD V1 **** D7KGI0_ARALY); contains Interpro domain(s) IPR012340 Nucleic acid DNA-binding, OB-fold	MALEQTIAFTNPFFSSTPRTPAKSLSFRFFSQSKQVQTAKLASGCRIRCSFEYNSSGNGNGSVYEYERYAGVSQYPRPSEVQWKKELCNSVQLIGNVAVPVQIKHLNSGKVVAWTRLAVRKSQNDTTWINLTFWDDLANVANQHVEKGQQIYVSGRLISDTVEGDDGKEQTYYKVVVQQLNFIEKSSPPIASYNGDSNSMAPRKKQNNFAANTTGSTEELWQAFFANPLEWWDNRKNKRSPNYPDFKHKDTGEALWVEGRYNPTWVKSQLAVLDSKMESFHDQNGSRNAEFMSMDNFQF	At1g47720	NP_001334117.1	4	9	4	0.719	0.00463648	5	1	6	35.2	not assigned.unknown	Cp	48	2	Cp	Cp	Cp	N	41.6	plastid	plastid	-
A Proteins were identified by acetone preparations and/or the gel method. For emPAI and Mol% calculations, only the data from the acetone prepartions were used. Proteins identified solely by the gel method have data for the number of peptides, PSMs and unique peptides.
B Names of tomato proteins were based on the literature, NCBI annotation (identified in BlastP searches), and/or SolyGenomics descriptor. In a small number of cases, tomato protein names were assigned based on NCBI annotations and the Arabidopsis homolog.
C Some Sol Genomics descriptors were updated when NCBI annotations and Arabidopsis gene annotations were aligned.
D Target P's subcellular locations are: chloroplast (Cp), mitochondria (M), secretory (S), and no predicted location is indicated by a dash (-).
E ChloroP was used to predict the presence of a chloroplast transit peptide (Y) and the lack of a predicted transit peptide is indicated with a dash (-).
F Predotar's predicted subcellular locations were: chloroplast/plastid (Cp),endoplasmic reticulum (ER) or mitochondrion (M). For proteins with localization predictions that were less clear, Predotar provided categorized of possibly Cp, M and ER. Proteins with unresolved locations or that did not have a homolog detected by Predotar are indicated with a dash (-).
G WoLF PSORT's and YLoc's predicted subcellular locations were: chloroplast/plastid (Cp), cytosol (C), cytoskeleton (Cy), endoplasmic reticulum (ER), extracellular (EX), golgi apparatus (G), mitochondrion (M), nucleus (N), peroxisomes (P), plasma membrance (PM), and vacuole (V). Proteins with no chloroplast location in WoLF PSORT are indicated by not Cp.The number of proteins predicted to be in t…

## Sheet: S6E-RNA processing & binding
Table S6E. RNA processing and RNA binding
Gene and protein descriptors							ProteomicsA								Bin codes		Algorithms								Databases
Category	Tomato Gene ID	Gene nameB	DescriptionC	Protein Sequence	Arabidopis homolog	Tomato proteinB NCBI accession	Peptides	PSMs	Unique Peptides	emPAI	Mol%	Acetone samples	Gel samples	Total	Bincode	Name	TargetP D ver.1	Transit peptide length	TargetP (reliability class)	ChloroP E	Predotar F	WoLF PSORT G	YLoc G	YLoc % Confidence	PPDB	SUBA4	plprot
RNA binding	Solyc01g089870	-	RNA-binding protein similar to At1g01250. Pentatricopeptide repeat-containing protein (AHRD V1 ***- D7KP29_ARALY); contains Interpro domain(s) IPR002885 Pentatricopeptide repeat	MLLQPTTTVKPPHQKTEKYVSFSSSLSYSLSFPSGFCNLGGFTKPLMCSKNHHSVISCSSTSQVHSYGTVDYERRPIVKWNAIYKRISMNDGPERGSVSVLNQWENEGKKVTKWELSRVIKELRKFRRYKLAFEVYEWMNNRPERFRLTTSDTAIQLDLIAKVHGISSAEEYFDKLPDTLKDKRIYGSLLNAFVRSRKKEQAESLLDKMRNRGYTNADHALPFNVMMTLYMNLKDYDKVESVVSEMKEKRIPLDIYSYNIWLSSCGSQGSIEKMEKVLEQMNLDTDINPNWTTFSTMATMYIKLGQMKKAEDSLKSVESRITGRDRIPYHYLISLYGSLGKKEDVLRIWKTYQSQFPNIPNLGYHSVISSLVRLDDIEGAEKIYDEWLPVKVHYDPRIG…	At1g02150	XP_004229730.1	11	40	11	2.831	0.0182558	5	3	8	27.3.67	RNA.regulation of transcription	Cp	57	4	Cp	-	Cp	C	0.8951	plastid	plastid	-
	Solyc04g009300	BPG2	GTP-binding protein BRASSINAZOLE INSENSITIVE PALE GREEN 2, chloroplastic [Solanum lycopersicum]	MALLLSTSTAAAAAAAVSSHLSLNSIFETKNILVPHLQFTGFTQKPHKKICQQKVPFLVLSVLKGSQSRTKRRSDSSSSSVSRKDSNFKLLLSEGRDNDENYGCICPGCGIFMQDEDPNHPGYYKKKKVEESLEDFVDDEDVVVGEGGDDEEEEEFGDFIEGELEEGGSEEMGSGSEDGFDDWDSEEWELGLEEAEGDLKELDGFLPAGVGYGNITQEVLEKGKKKRVSKSERKRMAREAAKGEKEEVTVCARCHSLRNYGQVKNELAENLIPDFDFDQLITSRLMKPTGKADATVVVMVVDCVDFDGSFPKRAAKSLFKALEQSQDGLKQSKKLPKLVLVATKVDLLPSQISPARLDKWVRHRAKANGAPKLSGVYMVSSRKDLGIRNLLAFIKELAG…	At3g57180	XP_004236836.1	3	7	3	0.259	0.00167017	4	0	4	35.2	not assigned.unknown	Cp	77	5	Cp	Cp	Cp	C	0.3996	plastid	plastid	-
	Solyc04g072036	BSF	PETB/PETD stabilizing factor	MPLLLLPCKSFSIFNPILPLNTSVIYNTAIQFSGFSLSPKYPLPRTPKSSKNLSIHWNYQINLPTHVLFCSKNEIFEEFRTTQLAELPESEELELHNKPYLKQIDNGVVSDVEEDQKKVSKDEVLEPFYKLFKPIESNEEESDIEQEEEVHPVVEESKKVSVEYYEPKPGDLVVGVVVSGNENKLDVSIGADLLGTMLTKDVLPLYDKEIGYLLCDLEKDAEEFLVRGKMGILSYDDAVSGESTPGKPVVEPGTVLFAEVLGRTLSGRPLLSTRRLFRRIAWHRVRQIKQLNEPIEVKITEWNIGGLLTRIEGLRAFLPKAELMNRVNSYTELKENVGRRINVLITRINEETNDLILSEKEAWQMLNLQEGTLVEGTVKRLFPFGAQIRLGETNRSGLL…	At1g71720	XP_004253265.1	6	13	6	0.738	0.00475901	5	0	5	29.2.1.1.3.1.1	protein.synthesis.ribosomal protein.prokaryotic.chloroplast.30S subunit.PSRP3	S	-	3	Cp	-	Cp	Cp	99.69	plastid nucleoid	plastid	-
	Solyc09g007850	CP29B	29 KDa RNA-binding protein A (AHRD V1 **-* C6F119_SOYBN); contains Interpro domain(s) IPR000504 RNA recognition motif, RNP-1	MASSSSSLHFLSLTPQTLPKPTSQTTSISFFSLPSSSLNLSLSSSSTPRYFESSRFVRKVTLSDFDQIEEVGAGDDDEEEEGGLSDEGASYQERNANPDLKIFVGNLPFSVDSAYLAELFERAGDVEMVEVIYDKLTGRSRGFGFVTMSSKEAVEAACQQFNGYEIDgranaLRVNSGPAPPKRENSFGGNSSYQGGRGGGSMDSSNRVYVGNLAWSVDQQQLETLFSEQGKVVDAKVVYDRDSGRSRGFGFVTYSSAQEVNDAIESLDGVDLGgranaIRVSPAEARPPrRNAQF	At2g37220	XP_004246655.1	11	217	9	165.81	1.06923	5	3	8	27.4	RNA.RNA binding	Cp	58	1	Cp	Cp	Cp	Cp	100	plastid stroma	plastid	plastid
	Solyc01g006940	CP33	33-kd RNA binding protein	MSVFSSSSSSSSSLHFFTQKPKFSVVEHISTSINNTHFNFKINNSINPIKSKPHFPISSLLASFSRISTHFSTSAVSDGAGVVGLDEEAELSAEEEIEEDEENEGGESLEKEEDGVVDEPKSIEDGRLYVGNLPFSMTPSQLSEIFAEAGKVANVEIVYDRVTDRSRGFAFVTMGSVEDAKEAVRLFDGSQVGGRTVKVNFPEVPRGGERQVMSAKIRSTYQGFVDSPHKLYVANLSWNLTSQGLKDAFADQPGFLSAKVIYDRASGRSRGFGFITFSSAEAMNNALDTMNEVDLEGRPLRLNIAGQRDPVSSPPVVKTSESENSVIL	At3g52380	XP_004228672.1	11	91	11	7.577	0.0488604	5	3	8	27.4	RNA.RNA binding	Cp	72	1	Cp	Cp	Cp	Cp	99.9	plastid stroma	plastid	-
	Solyc04g074750	CP33C	Polyadenylate-binding protein 1-A (AHRD V1 **-* PAP1A_DICDI); contains Interpro domain(s) IPR000504 RNA recognition motif, RNP-1	MALLRLLCSPSLFPSSSSTLFPLHHHSTTPVLLSPSSISWRTPCFSPLIPIKPQRPYLYISNCSSSAQDLEEQLEDGSLKRRVLAQNAPWTYSANDLRPLFEKYGTVEDIEVAMYNKTRSRGLVFVTMGSHEEAKAVLENLEAYELEGRPLRLAWAKPKTEKPSSPPPSKPLPIHNLFVANLHFEARSNDLLEFFKANGANVVSAEVIFNDNPRRSAGYGFVSLNTKEEADAALSSFDGKEFMGRAIRVAQSKRFLREETKKVIKSQELPSELISVAE	At4g09040	XP_004237950.1	10	66	10	34.938	0.225298	5	3	8	27.4	RNA.RNA binding	Cp	62	3	Cp	possibly M	Cp	Cp	100	plastid stroma	plastid	plastid
	Solyc09g065180	CSP41A	mRNA binding protein precursor; Csp41A based on identity with At3g63140;	MATLASSSSLLHSSSSSFNSSSTPSISPVSRISLKFPSSSLSSSLSISPYFVAFSLNSrRNAVSPKSYSSTSVVQASGAVEKKKVLIVNTNSGGHAVignaFYFAKELLGSGHDVTVLTVGEESSDKMKKTPFTRFSEITGAGGRTVWGNPADVGKILEGEVFDAVLDNNGKDLDSVSPVADWAKSSGVKQFLFISSAGIYKPTDEPPHVEGDAVKADAGHVLVEKYISEIFGSWASFRPQYMIGSGNNKDCEEWFFDRIVRGRPVLIPGSGMQLTNISHVRDLSSMLTLAVQNPAAASGRIFNCVSDRAVTLDGMARLCAKAAGSSVEIVHYDPKAVGVDAKKAFPFRNMHFYAEPRAANEILGWSATTNLPEDLKERYEEYVKIGRDKKEMKFELDD…	At3g63140	NP_001234656.2	17	244	17	114.478	0.738213	5	3	8	27.3.99	RNA.regulation of transcription	Cp	73	1	Cp	Cp	Cp	Cp	94.3	plastid stroma	plastid	plastid
	Solyc11g065870	ENGA	GTP-binding protein engA (AHRD V1 ***- Q9LH58_ARATH); contains Interpro domain(s) IPR016484 GTP-binding, EngA	MELNTAISLSKTLSLLSPISPTSSSLPPFSLSHRCHHFrRNACNLSRSFCLPPAVQLSTSREDEDEMVDIGGSEYEEEDDYAEDEDTLDVDSLEREAQLVVREFSDSLSRQLIIEEERSSPKEAQVKEKrRNAKNTTTKNIPNADHLLPKVAIVGRPNVGKSALFNRLVGGKKAIVVDEPGVTRDRLYGRSYWGNYEFMVVDTGGVLTISKSQTDLVEELAVSTTIGMEGIPLATREAAVAKMPTMIEKQATVAVEESSVIIFLVDGQAGLNAADVEIADWLRKHYSDKCIILAVNKCESPRKGITQASEFWSLGFDPFPISALSGTGTGELLDLVCAGIEKVEGTEYLEEENYIPAIAIVGRPNVGKSSILNALVGEDRTIVSPVSGTTRDAIDTEFT…	At3g12080	XP_004250946.1	2	3	2	0.194	0.00125101	2	0	2	30.5	signalling.G-proteins	Cp	54	1	Cp	Cp	Cp	Cp	88.1	plastid	plastid	-
	Solyc08g016080	HCF173	NAD-dependent epimerase/dehydratase (AHRD V1 *--- B3ECK3_CHLL2); contains Interpro domain(s) IPR016040 NAD(P)-binding domain	MSAATATFTPHVAFSNNNPIWRKPRSCTTNCKYSTASFVTRATSSSNSEIDNEKKNKRKKKKVVIDNKEQKVQETVEEKEQEQVQELQSSSVSVIKRLDDVNPVGLGRRSRQVFDEVWRKFSGLGQISRTIRSDDESTLLIREGGPMCEFAIPGAQNTTVLVVGATSRVGRIVVRKLMLRGYTVKALVRKAEPEVVDMLPRSVELVTGDVGDPSSLKNAVQGCNKIIYCATARSSITGDLIRVNADHQGVYNLTKALQDYNNKLAQQRAGKSSKSKLLIAKFKSEDSLNGWEVRQGTYFQDVVVSKYDGGMDAKFEFTEIGDAVFSGYVFTRGGYVDLSRKLSLPLGYTLDRYEGLVFSVGGNGRSYVVILEAGPSADTTQSKLYFSRISTKAGFCRVR…	At1g16720	XP_004244793.1	23	121	23	9	0.0580367	5	3	8	35.2	not assigned.unknown	Cp	41	1	Cp	Cp	Cp	C	64.9	stroma	plastid	plastid
	Solyc05g006070	HPE1 RBD1	High photosynthetic efficiency 1, HPE1, RBD1; RNA recognition motif (RRM)-containing protein-like (AHRD V1 *-*- Q6Z867_ORYSJ); contains Interpro domain(s) IPR000504 RNA recognition motif, RNP-1	MLSLGSYPRQPHCCASTISQCLPLFCKIPQPQLFFTSNTVTHLRIRSLIEQKRTGVCVFARKDEEKRGNSVVEMEEIEDFDDDYDDDDDDFLGDEEEVDGDDDDDDEVIIPLRNMKKWLENKPRGFGVDKEYDTSVEDKLMEEIEQSRKAQLANINKLKNNPVKANTKQVQQDKVVQDGLCVRLVNLPKKMNVDKDLRVAFKGVSGIVNIVPVVTGNKKTRNPVCKGMAYINFKSKDEAQRFVQMFSGRSISFGKVQKQIKCEMINPGSPKSTTTQSVHKIKHVPEKDIPDLSRDQDDDFDTDFLSDSEKNISTDYNVAEVEDLSAYTNGYEENSSAESTSGDEQDVGEESEFAEQKKVEAKEKKKRPKQKKEQVPKLNIPGSARKLKIKEKAVLTGVL…	At1g70200	XP_004238707.1	3	7	3	0.35	0.00225698	4	0	4	27.4	RNA.RNA binding	M	114	5	Cp	-	Cp	N	66.5	stroma	-	-
	Solyc05g006130	RH22	ATP-dependent RNA helicase (AHRD V1 *-** D3BPQ9_POLPA); contains Interpro domain(s) IPR001650 DNA/RNA helicase, C-terminal	MILQHSISICKLWRSSSPPNLYLFRPFVAYQPHCCRIRAFGSAVSASKVVETNTNETFFAEESVSWTSLGVSESLSRALSSSGLHRPSLIQAACIPSILSGVDVVVAAETGSGKTHGYLVPLIDKLCQISDSSGAITGQDARKHNRLSLVLCPNVMLCEQVVRMANSLCNDSGTPLLSIAAVCGRQVWPVKEPDVMVSTPAALLNYLYSIDPERRRRSEFIRSVKYVVFDEADMLLCGSFQNQVVRLINMLRFDEKQLSRSKNSGAEMSSTSDLEEFRDLKADYGEDADEVEDEDEDEDEDTEVGKDRANLETDTKGLKRRDWRRVRKIYERSKQYIFVAATLPENGKRTAGGVLKRMFPEATWVSGNYLHQHSPRLEQRWIEVSVDTQVDILINAVEN…	At1g59990	XP_004238711.1	1	3	1	0.129	0.000831859	3	0	3	28.1	DNA.synthesis/chromatin structure	M	86	5	Cp	Cp	Cp	M	63	plastid	plastid	-
	Solyc09g097910	SRRP1	S1 RNA-binding ribosomal protein 1; Polyribonucleotide nucleotidyltransferase (AHRD V1 *--- PNP_ALHEH); contains Interpro domain(s) IPR003029 Ribosomal protein S1, RNA binding domain	MSVAAMGIVSGGIGYLSQLFTSDIAASTHQFCCFSVNSSPLHMNFSRSGCLVKRGSLLSPRVSVSTTGNAKIDGVDDQLSLSPDEIKPARKSADWKAARTYSERGLIFEGKVEGFNGGGLLIRFYSLVGFLPFPQMSPYHSCKEPQKTIQEIARDLTGSVLSVKVIQADEDRRRLIFSEKEASWLKFSNKINVGDTYQAKVGSVEDYGAFVHLRFPDGSYHLTGLVHVSEVSWDLVHDVRDILTEGDDVRVKIINIDREKSRITLSIKQLEEDPLLETLDKVIHKDASVHKNSLDSNGSLVIEPLPGLETIIEELMQEDGIYDILISRQGFEKRVVSQDLQLWLSNAPATGDQFTLLARAGRQVQEIQLTTSLDQEGIKRALQRVLERVP	At3g23700	XP_004248019.1	8	43	8	2.594	0.0167275	5	3	8	35.1.14	not assigned.no ontology.S RNA-binding domain-containing protein	Cp	63	4	Cp	possibly Cp	Cp	Cp	97.4	plastid stroma	plastid	plastid
	Solyc11g012670	SRV7	Supressor of variegation 7; Pentatricopeptide repeat-containing protein (AHRD V1 ***- D7MRC5_ARALY); contains Interpro domain(s) IPR002625 Smr protein/MutS2 C-terminal	MASAPSSTLSPLYESNIFCNFNSPQKFTFPLKLHSKSCIRTTQVSLQEQSQVSNPNTSQYPDRKAVSSSKSKLWVNPKSPRASELKRKSYDFRYASLMKVAESLDSCKPVEEDVSNVLAELGDKIVEQDAVVTLNNMTNAETALLAMKYFQQRLKLSKEVIVYNVTLKVLRKNKDLDRAEKVFDEMLERGVKPDNVTFSTIISCARQCNLPEKAIEWFEKLPSFGCEPDDVTYSVMIDAYGKAGNVDMALSLYDRARTEKWRIDAVTFATLIRIYGAAGNFDGCLNVYEEMKALGVKPNMTVYNSLLDAMGRARRPWQAKNIYGEMLTNGFQPSWGTYASLIRAYGRARYGEDALKIYKEMKEKGLELSVVLYNTLLAMCADVGLTDEAVNIFEEMKSS…	At4g16390	XP_004250291.1	11	32	10	2.455	0.0158311	5	3	8	35.1.5	not assigned.no ontology.pentatricopeptide (PPR) repeat-containing protein	Cp	81	2	Cp	possibly Cp	Cp	C	98.6	plastid stroma	plastid	-
	Solyc02g005200	TAB2	PsaB translation factor (Fragment) (AHRD V1 ***- A4S2E4_OSTLU); contains Interpro domain(s) IPR009472 Protein of unknown function DUF1092	MACLSCSLPLLQTHKAISNFSVFPFKSVAICLPKCKVKSVHIPSVSEASSISSTNLEEEEDDDPTAELVYLDPEIDPESLSEWELDFCSRPILDIRGKKLWELLVCDDSLSLQYTKYFPNNLINSITLKDALLSISNDLGIPLPDKIRFFRSQMQTIITRACNELAIKPVPSKRCLSLVLWLEDRYETVYTRHPGFQKGAKPLLALDNPFPMELPENLYGEKWAFVQLPVSAVRKEVSNLETRLVFGSSLDLDLLGIEIEDNTLIPGLAVASSRAKPLAAWMNGLEVCSIEADVDKASLILSVGISTRYIYATYKKNPASTSEAEAWEAAKKACGGLHFLAIQNDLNSDDCVGFWLLLNLPPPPV	At3g08010	NP_001316880.1	4	13	4	0.848	0.00546834	5	3	8	35.2	not assigned.unknown	Cp	44	3	Cp	Cp	Cp	Cp	31.7	stroma	plastid	-
	Solyc03g118680	VAR3-like	Zinc finger protein (AHRD V1 *--- B6SYQ8_MAIZE); contains Interpro domain(s) IPR001876 Zinc finger, RanBP2-type	MSASRLFFLLGASTVRNCNKPTNISSPFSPFRFSKPLLCPVVRFRSYNCTSATLETKTIEPLVSPRNHPWPEWVAFVDRLKSKGYITEKSTSTGEDGDGSIYTDMNLLKDACLNFSRDRSDIFKKLSTQDMQKVVEKGCPNLFRKVVNSAKRLRIHLNLDEGEVCGACNFRGSCDRAYLILKESEGVARTVDIVRVLLIYAFDSAVISSGAMPPGSELIEVSARQLLSELVELSETPIDPNADHLTPAPKASPRKKESVGSRTDGLEDVEMKRRNSTGLEGEMPKRNVEMKQGDWICSQCTFMNFARNAQCLRCKSKGPSRDAPVVKEMKKGDWNCPQCTFMNFASNTKCLRCQEQRPKRQLNPGEWECPSCDFLNFRSNMVCKKCTCERPKDAKTQSK…	At1g48570	XP_004235791.1	1	1	1	0.096	0.000619058	1	0	1	30.5	signalling.G-proteins	Cp	51	2	Cp	possibly ER	Cp	N	61	-	-	-
	Solyc10g045490	WTF1	WHAT IS THIS FACTOR 1	MSSLQMSLLFTLPVKIQFQRNDPDFLRRSKISIICSNPGPHKLVPDRKLDKHVVKNNNIRFVYKLKTLLLSKPKHFMPIDVLYKCRGYLTLPKPRSILSMIQRYPTIFELFTIPTPPTPFNATKPLSQLCVRLTPPAAALLGKEFQLKLARSDFLAAKLQKLLMLTTHHSLLLSKLLHIAPDLGLPVNFRSRLCSDYPHKFQIVDTSLELISCDLALSNALPSHEVDHVSLGLIVDRPLKFKHLKLRRGLNLKRRHEEYLIKFKELPDVCPYKTRVNDFYKESINAEKRACAVVREVLGMMVEKRTLVDHLTHFRKEFGLPNRLRAMLIRHPELFYVSKKGQRDSVFLVEGYDDRGKLLERDEMLVMKDHLMELVRKGKQMRRETRNVFANLDDENEYF…	AT4G01037	XP_004248820.1	1	1	1	0.096	0.000619058	1	0	1	35.1	'not assigned.annotated'	-	-	4	-	possibly Cp	Cp	G	31	plastid stroma	stroma	-
	Solyc03g114660	-	Pentatricopeptide repeat-containing protein (AHRD V1 ***- D7KGE6_ARALY); contains Interpro domain(s) IPR002885 Pentatricopeptide repeat	MFTLASFPTAAPSPASNSCCRHQPQFQTVKVSPRPNKLRSFATTSVSKSAGSICTPTPEEDSITAKSTLKNQLKNPLTLSEEITQLCETKSLSEVFRTFQEYLENAFYHSSEKSEALGVLLQACGKQKDIETGRKVHEMVTSLTRSKDDVILCTRLITMYSMCGYPSDSRSVFHQLRSKKLYQWNVLMSGYTKNELWVAVICLFIELMTSTQEKPDNFTFPLVIKACGGVLDVGMGKAIHGMASKMGLVGDVFVSNALISMYGKFGLAEEAMKVFEYMPERNLVSWNSMISVFSANGYIEQSFDLFRNIFTGDEVLVPDTTTMVIMLPICAAAEEVEFGKIIHDLAVKLGLSDELTVNNSLVDMYCKVGYLSDAQILFEKNESKSAVSWNSIIGGYSRE…	At1g18485	XP_010318894.1	1	1	1	0.059	0.000380463	1	0	1	35.1.5	not assigned.no ontology.pentatricopeptide (PPR) repeat-containing protein	Cp	39	1	Cp	Cp	Cp	C	62	plastid	plastid	-
	Solyc01g111470	-	Pentatricopeptide repeat-containing protein (AHRD V1 ***- D7L879_ARALY); contains Interpro domain(s) IPR002885 Pentatricopeptide repeat	MSSSYPPLKPSQLVQTITTLLSSSPKSLPKCSLQSYLPHLTPPIIHSILSSPPLSSRPSTLFSFFQWSQSHIPSFSTHPLPFPSLLPILSSLLSHRRFTVARSLLLTFIPSNADHPQHLLHRHLLHPISNFPQPSTELLDTAIGAYCQCGKPHLALQIFKKMKRLRLCPNIITFNTLITALVRYPSTHSLFLCNELFNDALKLGLVPTTITINILIKVYCLAYKYKDANQLLDRMSEFGCVPDNVSYNTILDGLCEKGRLNEVRDLLLDMKGKGLVPNRNTYNILIHGYCKIGWLKDAAQIVELMTQNNTLPDVWTYNMLIGGLCNEGRIDDAIRIRDEMVGLKLLPDVKTYNTLINGCLDNKRSSEAFDLLEEMNQKGIKCNEITYNTLIKGYCKEGK…	At2g16880	XP_010315377.1	1	1	1			0	1	1	35.1.5	not assigned.no ontology.pentatricopeptide (PPR) repeat-containing protein	Cp	30	4	Cp	possibly Cp	Cp	Cp	0.8949	-	-	-
	Solyc01g095690	-	Pentatricopeptide repeat-containing protein (AHRD V1 ***- D7KIA6_ARALY); contains Interpro domain(s) IPR002885 Pentatricopeptide repeat	MEAVATPLYHFISPLNQKQPRCYSTNFGLVNVAETLPESSLSTSLESLSSLQFDYENKFNSLNSVRAMHAKMIKLSNEWDTKKNMQYFISGYLEFGDFQSAAVLFFVGFAENYLYWNSFLEEYTYFGGTPCEILEVFSELHSKGVNFNTEILAFVLKICSKLRDMWLGLEVHACLIKKGFDLDVYTKCALMNFYGRCCGTESANKVFKETSMHDSLLWNEAILVNLRNEKWTEGLQMFRDMQDLFVKANSLTISKVLQACGKLGALDEGKQIHGYVIRYALESNILIRTALINMYVKNDNIKLARVVFASTDNRNLPCWNSIISGYTALGYLDDAWELFHEMKTCNIKPDIITWNSLLSGHFLHGSYREVLAIVTRMQSAGYQPNRNSITSALQAVSEL…	At4g01030	XP_004231209.1	2	2	2	0.11	0.000709337	2	0	2	35.1.5	not assigned.no ontology.pentatricopeptide (PPR) repeat-containing protein	Cp	44	3	Cp	possibly Cp	Cp	C	99.3	plastid	-	-
	Solyc02g094150	-	Uncharacterized protein (putative RNA-binding protein) \;Sua5/YciO/YrdC/YwlC family protein (AHRD V1 ***- C9KUX7_9BACE); contains Interpro domain(s) IPR004388 Sua5/YciO/YrdC/YwlC	MIVGVEEMSLEAKALGHSGIAGAVPLSFRRSFSSFPTRLSFHTAVPPQTRRFQSLAVIKRSPKRLKYSAPRLTKEDGLLYVQVDQFGSDSWKLDPVVELLKGGAVGVIPTDTLYAIVCDLSSHSAIERLRRIKEIEPSKPLSIICRSFRDIDTYTTGFPRGNAQGLTDIFRAVKHCLPGPYTFILTASKQLPKQCTRYGSATSKYASRKNVGVRIPDDPVCQAILEKLDRPLISTSVKSPKEDEWILDPVIIADVYGPEGLDFVVDAGVRVADPSTVVDMTESAPRIIRQGKGPKQPWMIAEDDDSPVDE	At3g01920	XP_004231776.1	1	4	1	0.359	0.00231502	3	0	3	35.1	not assigned.no ontology	Cp	71	3	Cp	-	Cp	C	84.8	plastid	plastid	-
	Solyc07g043600	-	Pentatricopeptide repeat-containing protein (AHRD V1 ***- D7LWA0_ARALY); contains Interpro domain(s) IPR002885 Pentatricopeptide repeat	MPQTMMIFLKPFISPSSSSLWSKSNSGENSLKTNVKICKRAEVVCQGMLTPRKFMQKRRKVEVFKSAEDEADQKNWRKMMNEIEEAGSAVSVLRTQRDKNQALPKNLVLGSLVRFKQLKKWNLVSEILEWLRTQHWWDFNEMDFLMLITAYGKQGDFSKAERILGYMNKKGYPANVISHTALMEAYGKGGQYAKAEAIFRRMQTSGPEPSAITYQIILKIFVEGDKFNEAQDVFEALMDMDAPPLKPDQKMFHMMIYMYKKAGKYEKARHLFSLMTERGIPQNTVTYNSLMSFETNYKEVANIYDQMQRAGLQPDVVSYALLISAYGKARREEEALAVFEEMLDAGVRPTQKSYNILLDAFAISGMVEQARTVFKSMRRDRCSPDLCSYTTMLSAYINA…	At3g59040	XP_004243629.1	2	2	2	0.202	0.0013026	2	0	2	35.1.5	not assigned.no ontology.pentatricopeptide (PPR) repeat-containing protein	Cp	45	1	Cp	Cp	Cp	C	97.4	plastid nucleoid	-	-
	Solyc04g008570	-	Pentatricopeptide repeat-containing protein (AHRD V1 ***- D7M5W2_ARALY); contains Interpro domain(s) IPR002885 Pentatricopeptide repeat	MWLKSTLISLKSITTHLSNDKWSIQATCMMAIATSSDWSFPPCINCKNRILKPKFCYSCKTLPFLSNIFLNSTTTLVAKSSSSCSSPVLDEKKSQKTPSKSSQVIELLDLEQIQDFSSTTNGTTSLPDSKDLNGVICSLLKDTQTQEIGYDYYEKAKGEKDFRPEKSTLKLLIRYLVNSSKWGSVFSLSKDLRTLKVLPDSSTCCRLISSCMKSRKFKIVNSFLELFIVVDQEISVLAFDSAMRGYNKLHMYSSTVVLYEKMKSARLVLDPGCYCSIMEAHSKMGNSDKVVSFFEEFESKRVESTTPQYVQVYKCLCESLGKSGRAYEALEYFRDMTKKGIQENADHSFYSIVICGFASIRDVKMAEELLEEAEGKKMLRDPALFLKLVLMYIEEGCME…	At5g13770	XP_004237182.2	1	3	1	0.072	0.000464293	3	0	3	35.1.5	not assigned.no ontology.pentatricopeptide (PPR) repeat-containing protein	Cp	77	5	-	possibly M	Cp	C	96.7	plastid nucleoid	-	-
	Solyc10g086210	-	Translin-like protein (AHRD V1 ***- Q9SJK5_ARATH); contains Interpro domain(s) IPR002848 Translin	MISAFRNTLFTHYLLNPKPFFPLLLISTQKSTFVSSTSSLCKPRSHSTFLSTLMAGGDFLNPSSDKLEKQFEDFRHHLEESGNLRERIRAVATEIDSVTRLIYASLLLVHQSRPVAEVIERAKSQIGVLKELYSRLSEIIRECPGQYYRYHGDWKSETQTVVSLLAFMHWLETGTLVLHSEVEEKLGLTPTEFGLDVDDYLIGICFMSNELPRYVVNQVTAGDYDCPRKVLKFLTDLHAAFRMLNLRNDFLRKKFDGMKYDLRKVEEVFYDVKIRGLAANGDSTGEKQAQGQS	At2g37020	XP_004249627.1	2	6	2	0.389	0.00250847	5	2	7	35.1	not assigned.no ontology	M	115	5	Cp	possibly M	Cp	M	88.8	-	plastid	-
	Solyc07g066390		Pentatricopeptide repeat-containing protein (AHRD V1 ***- D7KVY0_ARALY); contains Interpro domain(s) IPR002885 Pentatricopeptide repeat	MAVPLNSVSIITNPSPENARNPRGFSTHIPKFLPFFQSRSISRNLASSHLSPALKEQLPVASKGSIFTLPNWRSGKNDPRNKELRLYDAFLYLEYMVGKGQKPDKTHATQLLYDLCNCNKLRKAARVMEMMVSSGTIPDAASYTFLVNNLCKRGNVGHAMQLVDKMEEYGYPTNTVTYNSLIRGLCMRGNLNKSLQFVEKLIQKGLVPNAYTYSILLEASYKEKGVNEAMLLLDNIIAKGGKPNLVSYNVLLTGLCKEGRIDEAKQFFRNLPSKGFNPNVVSYNILLRSLCFEGRWEEANEFLAEMVGEDRSPSIVTYNILISSLALHGQTNADHAIKILDEMYFGEQFKPIAASYNPIIARLCKDRKVDAVIKCLDQMLERHCSPNEGTYNSIAVLCD…	At1g79080	XP_004243988.1	1	2	1	0.101	0.0006513	2	0	2	35.1.5	not assigned.no ontology.pentatricopeptide (PPR) repeat-containing protein	Cp	60	1	Cp	Cp	Cp	Cp	69.3	plastid	-	-
	Solyc03g111840	-	28 kDa ribonucleoprotein	MSSLTKPLIKNLSMATNSCLISLPPFFTTTKSMSFISTPLKPISLSSSLSLKKTTTQFPSIVSVVAALQDDDSSVGLEDKEQGGEALSFDFASVGDAGESDEAEAEAEEYQEPPEDAKLFVGNLPYDIDSEGLAQLFQQAGVVEIAEVIYNRETDRSRGFGFVTMSTVEEAEKAVVLYNRYDLNGRLLTVNKAARRGSQPERPPRTFQPTYRIYVGNIPWDIDDARLEQVFSEHGKVVSARVVYDRESGRSRGFGFVTMSSEPEMSEAIANLDGQTLDGRTIRVNAAEERPRRNTF	At4g24770	XP_004236291.1	7	128	7	18.953	0.122219	5	3	8	27.4	RNA.RNA binding	Cp	65	1	Cp	possibly M	Cp	Cp	99	plastid stroma	plastid	plastid
	Solyc07g053690	-	RNA binding: OB-fold nucleic acid binding domain containing protein (AHRD V1 ***- B6SHT0_MAIZE); contains Interpro domain(s) IPR012340 Nucleic acid-binding, OB-fold	MATPAAAAAAPSTAATSEKKKPVFVKAESLKPGTHGHNLTVKVVDSNAVKATGGANRGGRSSASLNPRGPVRLAECLVGDETGCILFTARNEQVDMMKPGSTVILRNAKIDMFKGAMRLAVDKWGRVEVTEPADFDVNQENNLSLVEYELVNVEE	At2g33845	XP_004243375.1	1	4	1	1.371	0.00884092	2	0	2	27.3.99	RNA.regulation of transcription	Cp	94	2	Cp	Cp	Cp	Cp	79.5	-	cytosol	-
	Solyc08g076840	-	Polyadenylate-binding protein 2 (AHRD V1 **-- PABP2_ARATH); contains Interpro domain(s) IPR012677 Nucleotide-binding, alpha-beta plait	MAAIELAASSIFSSPPSSSSYLKFPLFPNSIKLQNYNHSLNLSLKSILYPLPLPSRKQCTQLHCSAVEVTEPVTVQEEKTEKPQKNNQrRNAKLFVLNLPWSLTVADIKNIFAECGIVDDVEIIKTKDGKSRGFAFVTMSSGEEAQAAIDKLDSYEVSGRIIRVEFAKRFKKPPGAPPPSTPPQGEARHKLYVSNLAWKVRSTQLREFFSANNNPISARVVFDNASgranaAGYGFVTFDTKEQAEAALSALDGKELMGRPIRLKFSERDADGSENKEEAPTQENPEEP	At2g35410	XP_004245902.1	8	71	8	3.437	0.0221636	5	3	8	27.4	RNA.RNA binding	Cp	65	2	Cp	Cp	Cp	Cp	99.8	plastid stroma	plastid	plastid
	Solyc09g010450	-	Pentatricopeptide repeat-containing protein (AHRD V1 ***- D7KS33_ARALY); contains Interpro domain(s) IPR002885 Pentatricopeptide repeat	MAFSFSSFLKCHPWIQSQNPPNPFSFPPPFHPPKPISLPFSSRHEHVSSTVLPSKAKELLQDFTPKQFLDTLRQENDETSAFHLFEWASKQPHFTTTLSIYEEILRKLGNVGFFDLMKGVLDDMKRLKVELVEGTFFIFIESYAKFELYNEAIKVLDMMWNEFGVKPGTFSYNLLLNVLVDGNKLKFVENVHSRMLDEGVKADVSTFNILIKALCKTHQIRPAILMMEEMPMHGLVPDERTFTTIMQGYIEEGNLDGALRIRDQMVSAKCLASNITVNLLIHGYCKEGRIDEALNFVQDMCSRGFSPDQFTFNTLINGLCKAGHAVQALDILDLMLQDAFDPDVYTYNILISGLCEVGEVQEAMELLNQMLVRDCTPNTVTYNTIISALCKVNQVQEAT…	At3g53700	XP_004246460.1	1	1	1	0.083	0.000535227	1	0	1	35.1.5	not assigned.no ontology.pentatricopeptide (PPR) repeat-containing protein	Cp	43	1	Cp	Cp	Cp	C	64	plastid	plastid	-
	Solyc09g090960	-	RNA-binding protein (AHRD V1 **-* Q8SMH8_PERAE); contains Interpro domain(s) IPR000504 RNA recognition motif, RNP-1	MAAAAATAIASSFSSLHSIRTKSNLTNSNADHLLKISSARTPNLTLISSSVSELTSIYKKWRVLPRLSAAVAQEEAEAAVTEEEVPAPAVDEEEKVGEGSDGSSESEGVNTKLYFGNLPYLCDSAQLAGIVQDYASPELVEVLYDRDTGKSRGFAFVTMSTLEDCKTVVENLDGREYGGRTLRVNFSDKPKPKEPLYPEtheKLFVGNLAWSVSSESLAQAFQEYGTVVGARVLYDGETGRSRGYGFVSFETREEMENALNNLNGVELDgranaLRVSLAQGKKQ	At1g60000	XP_004247794.1	6	31	6	4.012	0.0258715	5	2	7	27.4	RNA.RNA binding	Cp	66	1	Cp	Cp	Cp	Cp	100	plastid stroma	plastid	-
	Solyc10g062340	-	Polyadenylate-binding protein (AHRD V1 *--- C4JVG5_UNCRE); contains Interpro domain(s) IPR000504 RNA recognition motif, RNP-1	MPPKSVRKTASGSGSKRGGRTPRGTPKSQAKSVKVEEPMEVQDKDKAVEEVSEEKPELKITQSEPEEPAETALNVNAVGKGAVSEKKKDNLKESVNADHYEKGERLDLGDNDPEYEPEEYGTVDYDENGIEHDGVQEEGNEIEEEPEEADVGEEEEGDMAEEDVEDVHEENEGDEEDEHAEMADAAEEEEHHEVVDERRKRKEFEIFVGGLDKDATEEDLRKVFSKVGEITEVRLLMNSQTKKNKGFAFLRFATVEQAKRACTELKTPVINGKQCGVSPSQDNDTLFLGNICKTWTKEALKEKLKHYGVHNIEDLTLVEDTNNEGMNRGFAFLEFSSRSEAMDAFKRLQKRDIVFGVDRPAKVSFEDSFIDPGDEIMSQVKTVFIDGLAVSWNENADHV…	At2g44710	XP_010327665.1	1	1	1	0.059	0.000380463	1	0	1	27.4	RNA.RNA binding	Cp	27	3	Cp	-	Cp	N	99.7	-	-	-
	Solyc12g013870	-	RNA-binding S4 domain protein (AHRD V1 ***- B2IVN0_NOSP7); contains Interpro domain(s) IPR017506 Photosystem II S4 domain protein	MCALRVPAMAAAGFAAQSILRRVVPSFLSTRPTTHVVGDFFSGTNLILRTPLHPSAFGICSLPQAIKGDADILLKGVRDKNTIEDVKRIVELAKRASLRREVLHTEFLTPPVLKESMLVLERLADLRIVAQGGYPEAERCRLSVGHVEALTSDPDNVAALSISGNFSFQPCSHGDFLGAILGTGIARNKLGDILLQGEKGAHVLVVPELSDFLISALDKVGNVSVSCKKIPLLALEYEPPRTKSSKSIEASLRLDAVASAGFKVSRTKMASLISNGDVRVNWSTVTKSNTIIKTGDMISVSGEGRLKIGEISSTRKGKFSVELIRYL	At1g53120	XP_004251860.1	1	1	1	0.129	0.000831859	1	0	1	35.1.14	not assigned.no ontology.S RNA-binding domain-containing protein	M	34	5	Cp	possibly M	Cp	Cp	49.9	plastid	plastid	-
RNA processing	Solyc11g008940	CCR2	Chlororespiratory reduction 2, CRR2, Pentatricopeptide repeat-containing protein At3g46790, chloroplastic (NCBI)	MWTLLQTPPPPPPCGVQNPYSSRRISTAFGHSTGNDSASKSINLCLRCNYNDSIQSYCKKGELKQALQLLSQEPNPNQHTYELLILSCSEKNSFHDGLTVHRKLIDDGFEQDPFLATKLINMYSNLDSIDHARQVFDKINNRTIFLWNAFFRALTLAGNGVEVLKLYTRMNSIGIISDRFTYTYVLKACAVASLPKHKEIHAQLFRHGYHTHTHIMTTLIDVYARFGYVENAACVFDQMPQKNMVSWSAMIGCYAKNGKPLEAFDVFRDMMNHVLLPNSVTMVSVVQACAALGALEQGKVLHGYILRKGLDSILPVLSALVTMYARCGALELGRRVFDQMGKRDVVAWNSMISSYGIHGFGGKAIETFREMIRHGVSPSPISFVSVLGACSHAGLVEEG…	At3g46790	XP_004250510.1	3	9	3	0.311	0.00200549	3	0	3	27.1	RNA.processing	Cp	47	3	Cp	possibly Cp	Cp	Cp	64.1	plastid stroma	plastid	-
	Solyc02g087250	CFM2	Group II intron splicing factor CRS1-like IPR001890 RNA-binding, CRM domain	MNIINRAASIFLLLVFFLAFFKDSVHGRPLLLSMSRPKPDDAALFARWLVSQNYWGVLNTIASDMGGAPFGNVVSFSDGLPDKGRGIPYFYLTTLDPTARLKDQRSSFTISEYAIGTCGKKDPENPSCAKITLVGKLKVVAGDPKETSFAQTALFTKHPEMEGWPKSHDFQIYKLEIEEIFMINWFGGPKPLTVDQYLQAKMIASSSSTPMLLPFCNFHPINPSKTLLKPSPSHSLFSSTPSLSPKPFFPRDSLPVFAASPDTEALPESAIRRIADKLRSLGFVEQPKNQETQELSSNPTANSPGQIFVPLPTQLPKYRVGHTLDTSWSTPENPVPQPGLGKSIQKFHELRDEFLKEKDKERLKNKEYKKERAPSLAELTLPAEELRRLRTVGIALRKK…	At3g01370	XP_004232267.1	1	16	1	0.04	0.000257941	5	3	8	35.2	not assigned.unknown	S	-	1	-	ER	Cp	Cp	93.32	plastid stroma	-	-
	Solyc07g039500	CFM3	Group II intron splicing factor CRS1-like (AHRD V1 *--- Q5JK64_ORYSJ); contains Interpro domain(s) IPR001890 RNA-binding, CRM domain	MAAMASTPLSFDYISSKQLQFSIPIPKIQDWHSCRAKNVVRVYCSSPQTIHSNREKQINEIKKQRKPRPSFVKQVQDKWSVKPTSLREKFPWQEGNSVSVEEVVEAQVQISKLENPVVNDSVSSGSRVKVNLAPWVHGKQPKISQLGESSSLDKSLENCEDIGSSREQKSLNKQVNVDGTDFEKDIKLESKVEAHVDKGITYANESVRLPWEGDKLRKSNAELAEKLIPEAQLKRLRNAALRMVERIKVGSGGVTQELVDSIQKKWKVDEIVKLRFEGAPSHNMKRTHDILEHRTGGLVIWRSGSSIVLYRGISYKLPCVQSFTSKNHDVNESEYPNNDSCQSLGVKCLNEAVERPRNGSTDLSGEEIVDLSELNMILDEVGPRFKDWSGRGPMPVDAD…	At4g29750	XP_010324059.1	1	1	1	0.044	0.000283735	1	0	1	35.2	not assigned.unknown	Cp	2	5	-	Cp	Cp	C	76.7	plastid stroma mitochondria	plastid	-
	Solyc10g086150	CP29B	29-kDa ribonucleoprotein B, chloroplastic [Solanum lycopersicum]	MASSVSSLQFLFVTPQTLSSLKPNSTPTSFSFFSLPSSSLNLSLSSSTPSSFIRPFESSSFGSRFIRNVALSEFDQLEDDVGEVEEEPNFSPDLKLFVGNLPFSVDSATLAELFERAGNVEMVEVIYDKLTGRSRGFGFVTMSSKAEVEAAEQQFNGYEIDgranaLRVNSGPAPEKRENSFGGGRGGRSENSSYGGARGGRNFDSSNRVYVGNLSWGVDDLSLRELFSDQGKVVDCKVVYDRDSGRSRGFGFVTFSSAQEVNKAIDSLNGFDLDGRPIRVSAAEERPPrRNAQF	At2g37220	XP_010312344.1	13	105	11	186.382	1.20189	5	3	8	27.4	RNA.RNA binding	Cp	67	1	Cp	Cp	Cp	Cp	99.7	plastid stroma	plastid	plastid
	Solyc12g096510	CREF	Chloroplast RNA editing factor, Pentatricopeptide repeat-containing protein (AHRD V1 ***- D7MMG1_ARALY); contains Interpro domain(s) IPR002885 Pentatricopeptide repeat	MQATITSVIPTPQSPLSHQTSNVNTLRGLESCSSMSKLKQFHAQIVKHGLSHDNDAMGRVIKFCAISELGDLSYALQVFDKLPEPDPFIYNTVIRGLLKSQMLRDSLLFYLCMLESSVRPNSFTFPPLIRVCCIDNAVEEGKQIHGHVVKFGFGFDRFSQNNLIHMYVSFRCLEEAKRVFDNMCERDDVSLTTLISGYAQLGYVDEAFQVFDSIREKSCVIWNAMISAYVQSNRFHEAFALFERMGCEGVVVDKFLAASMLSACTRLGALKQGEWIVEHVKKSGIELDSKLSATIVDMYCKCGCLDKAVEFFQGLSRKGISSWNCMIGGLAMHGEGEAAIEVLKEMESERVAPDYITFVNLLSACAHSGLVEEGKHYFRYMKETYGIEPGMEHYGCLVD…	At5g66520	XP_004253185.1	2	3	2	0.155	0.00099952	2	0	2	35.1.5	not assigned.no ontology.pentatricopeptide (PPR) repeat-containing protein	Cp	33	3	Cp	-	Cp	Cp	60.8	-	mitochondrion	-
	Solyc08g045850	CRP1	Pentatricopeptide repeat-containing protein (AHRD V1 ***- D7MTG0_ARALY); contains Interpro domain(s) IPR002885 Pentatricopeptide repeat	MVGLSVPSTFTGTCWRRRRRMNTLLLPPPSQLPYQFHPRRQILGQHSSTSHLSISNQFNISIEEEEEEEDDDVGSYSNQRYDFTRLLQFLSTTEPNSDNSSPTQLDPTELRLAESYRAVPAPLWHSLLKDLSSTPSSISIAYALVIWLQKHNLCYSYELLYSILIHALGRSEKLYEAFLLSQRQTLTPLTYNALIGACARNGDLEKALNLMCRMRRDGYQSDYVNYSLIIQSLIRSNSIDLTMLHKFCYEIEADMIELDGQLLNDMIVGFAKAGDVDTALGFMSVVQGNGLSPKIATVVNLISELGNSGRTDEAEAIFEELKEGGLKPRTRAFNSLLKGYVKTGSLKDAEYIVSEMERSGVAPDEHTYSLLIDAYGNAGRWESARIVLKEMEANNVQPN…	At5g42310	NP_001333499.1	6	14	6	0.738	0.00475901	5	2	7	35.1.5	not assigned.no ontology.pentatricopeptide (PPR) repeat-containing protein	M	112	2	-	M	Cp	M	85.9	stroma	plastid	-
	Solyc08g013850	CRR21	Pentatricopeptide repeat-containing protein (AHRD V1 ***- D7MKK8_ARALY); contains Interpro domain(s) IPR002885 Pentatricopeptide repeat	MASLPINPTFNPYTPGPGTSKPSSFQKSPQTHLDGTNEKFLNKSHYFKLLGSLCKESKLQEAVDFLKEMEYGNLYVGPEFYGELLQGCVYERNQKLGKQIHAKILKRGDFFAKNEYIETKLVIFYAKCDVFDVSNHLFCRLRKQNVFSWAAIIGLHCRMNLSKEALLKYIEMLENGILGDNFVLPNVLKACGALNVVEFGKCVHGHVLKLSYEDCVFVASSLIDMYGKCGVLDDARKVFDCMCERNVVAWNSLIVSYMQNGFNEEAIGVFYDMRTEEIEPTHVTLSSFLSASANLCALQEGKQGHAISIVSGLDLNNILGSSLINFYAKVGLVNDAELIFDRLFEKDVVTWNLLMSCYVQSGKIDKALNLSRWMRLKGFRFDSVTLSTILSASAELRDL…	At5g55740	XP_004244817.1	1	1	1	0.086	0.000554573	1	0	1	35.1.5	not assigned.no ontology.pentatricopeptide (PPR) repeat-containing protein	Cp	23	5	Cp	Cp	Cp	C	83.9	plastid	plastid	-
	Solyc06g073260	CSP41B	Chloroplast RNA binding (CRB); chloroplast stem-loop binding protein of 41 kDa	MASLVAIQPKQPSFSLLPSSNSDFNGARLISSFQYKRKPCLSKGALQVTASSEKKILIMGGTRFIGVFLSRLLVKEGHQVTLFTRGKAPISQQLPGESDQDYADFSSKLLHLKGDRMDFDFVKSSLSAEGYDVVYDINGREATEVEPILDALPNLEQYIYCSSAGVYLKTDYLPHFEVDAGDPKSRHKGKLETESLLVSRDVNWTSLRPVYIYGPLNYNPVEEWFFHRLKAGRPIPIPNSGMQITQLGHVKDLAKAFVQVLGNEKASKQVFNISGEKYVTFDGLAKACAKAGGFPEPELVHYNPKEFDFGKKKAFPFRDQHFFTSIEKSKAELGWKPDFDLVEGLTDSYNLDFGRGTFRKAADFSTDDMILEKKLVPQS	At1g09340	XP_004241412.1	26	455	26	694.193	4.47652	5	3	8	35.2	not assigned.unknown	Cp	49	2	Cp	Cp	Cp	Cp	89.2	plastid stroma cytosol	plastid	plastid
	Solyc04g078480	DCL	DCL protien	MAAPLLLRGLPLLRLRFCYQRLPNPSFVQLSSRLFSAASESAQPFDDAASDGDQTTAVLSAKDPPNYPRWSDPDYRKWKDQETQILKDIEPVIFLAKEIIHSDRYMDGECLTAEDEKIVVDKLLAYHPHSEDKIGCGLDSIMVDRHPQFKRSRCLFVVRLDGGWIDFSYQKCLRQYIRDKYPSYAEKFIKEHFKRGS	At3g46630	XP_004238128.1	1	1	1	<0.038	0	1	0	1	33.99	development.unspecified	M	35	1	-	ER	Cp	Cp	85.03	plastid	plastid	-
	Solyc04g078850	DCL	DCL protien	MASICTSNFHFLCRKNNSSPISHHLLLSPSSLSFSRCGGLRLCRCAAVKTGSEGGGIRSDELLRKPVISTELETTSESEELVKEESDDEVGKKSGDGEGWVDWEDQILEDTVPLVGFVRMILHSGKYAIGDRLSPNADHQRTILQRLLPYHPECDKKIGPGVDYITVGYHPDFENSRCLFIVRKDGETVDFSYWKCIKGLIRKNYPLYADSFILRHFRKRRRND	At1g45230	XP_004238128.1	2	2	2	-	-	0	2	2	33.99	development.unspecified	Cp	44	2	Cp	Cp	Cp	Cp	94.9	plastid	plastid	-
	Solyc12g056850	DJC65	Co-chaperone protein DnaJ (AHRD V1 *-*- A7I1Z6_CAMHC); contains Interpro domain(s) IPR001623 Heat shock protein DnaJ, N-terminal	MSNLRSICRPQVVYFSITCCCRDLLGKSAVRVSNWNLSSVSRWTKPPVLQSWYHTSSRMETWNADHRLNQQRKMVTTSAYNWNDSKSPYETLELEGDADEEQIKVAYRRLAKFYHPDVYNGRGTLEEGETAEARFIKIQAAYELLIDADERRKYDKDNRVNPMKASEAWVEWLMKKRKAFDQRGDMAIAAWAEQQQLELNLKARRLARSKMDPEEERRIIAKERKASVENFNNTLKRHTLVLRKRDIMRRKSEEEKKRVISRLLAAEGLELAEEDDKNL	At1g77930	XP_004252553.1	2	7	2	0.701	0.00452041	5	0	5	27.3.99	RNA.regulation of transcription	M	107	5	Cp	-	Cp	C	99.9	-	-	-
	Solyc07g021620	DYW2	Pentatricopeptide repeat-containing protein (AHRD V1 ***- D7LCN4_ARALY); contains Interpro domain(s) IPR002885 Pentatricopeptide repeat	MASLSPFPGKANSIFSPNIHLKFRIPYSTLFFRPFCAAPHDRSSTTSPNNNRYSPQSRPRRNNQQDYRRISTPIKKKADPVTLSPILAADVDLMSLCNEGKIDQVIEYISQGVDTDFHIFETLLSYCIKIASLDVGEKVHELLLRSPWSNNIELNSKLVKMYVKNGSTRSARKVFDKMRERKLDLWHLMISGYAETGDGESGLLLFEQMRKLRRLEPNGDTFSVVLSACASKGYVKEGFTYFELMKNEYGIVPGVEHYLGIADVLGKSGHLNELLEFIEDMPIEPTKVVWEAVINFARIHGDIELEDRTEELLIMLDSSRNMADKPVAPFQKRHSEFNMLEGKDRVNEFKSTIPHRADAYEKLKGLSGQMRDSGYVPDTRYVLHDIDEAAKEQALMYHS…	At2g15690	XP_004242943.1	1	1	1	0.096	0.000619058	1	0	1	35.1.5	not assigned.no ontology.pentatricopeptide (PPR) repeat-containing protein	Cp	60	1	Cp	Cp	Cp	C	52.5	mitochondria plastid	mitochondrion	-
	Solyc02g077280	ERA-like	GTP-binding protein era homolog (AHRD V1 ***- D0MDG4_RHOM4); contains Interpro domain(s) IPR005662 GTP-binding protein Era	MRALCLNVSLFTATLPKNNTPLIHSYCNCFSTSFPGDNGRFGQRVTTTRRRNSKSEIFLGDEEEVQAGENEKFSSIAEETSRAMRLRRSKGVVDTEEEEEEDDSSMLLSLSVKPDRNMALLDDYEMEELDFVPENPNHRSGYVAVLGKPNVGKSTLSNQMVGQKLSIVTDKPQTTRHRVLGICSGPNADHQMILYDTPGVIEKKMHKLDTMMMKNVRSAAVNADCVLVVVDACKVPAKIDEVLEEGVGDLKYKVPTLLVLNKKDLIKPGEIAKRLEWYEKFTDVDEVIPVSAKYGHGVEDVKDWILSKLPLGPAYYPKDIASEHPERFFVAEIVREKIFLQYRNEVPYACQVNVVSYKTRPNAKDFIQVEVIVERNTQKIILIGKEGKALKLLATAARL…	At5g66470	XP_004232950.1	9	31	9	1.555	0.0100274	5	3	8	35.2	not assigned.unknown	Cp	66	5	Cp	-	Cp	C	99.6	plastid stroma	plastid	-
	Solyc02g079210	MORF1	MORF1 (MULTIPLE ORGANELLAR RNA EDITING FACTOR 1)	MALYTSRLRRALPLSSSIFAQTFHQPNLISPIASLSQCTSTQSNLSKLNRFDFPSQWRLFRSSTISLSSRSRSFDRNPADDEIGPDTILFEGCDYEHWLIVIDFPKDTQLTREEMIETYVQTAAKVFGSVEEAKKKIYALSTTTYRGFQVLCSEDTSKKFEGLPGVVFVLPDSYIDPVNKEYGGDKYNNGEIIERPPPPQFQRQGSRPRRGPQYQQGNYRPPQQNYGPAQGHPPQQNYGAAQGPPPQQNYNAPQGPPPQQNYGPPRYPPPQQNYGSRQYAPPPQQNYRQPQDLSPQQNYERPQNPQPNQSYGVPQSVPSQWNHGLQPKFVPQQIYGPQGAGNADHRGPAPPDSNLDAWDNSQVGWGDSIRSPFPRRDQRGGAPPEQGGFGGVQHYGSQQ…	At4g20020	XP_004232793.1	1	2	1	0.179	0.00115428	1	0	1	33.99	development.unspecified	Cp	66	5	Cp	M	Cp	M	99.2	-	-	-
	Solyc06g008220	MORF2	MORF2, MULTIPLE ORGANELLAR RNA EDITING FACTOR 2	MLTTAAAMMAGSATPFPSTSVYLAAGELSLSIPVPKPTNFAGRSSTFRRNSILHSIRVENPNSGRVNTIVCKANRSAYSPLNSGSNYGDRPPTEMAPLFPGCDYEHWLIVMDKPGGEGATKQQMIDCYIQTLAKVVGSEEEAKKKIYNVSCERYFGFGCEIDEETSNKLEGLPGVLFVLPDSYVDPENKDYGAELFVNGEIVQRSPERQKRVEPVPQRAQDRPRYNDRTRYVRRRENTR	At2g33430	XP_004240482.1	2	3	2	0.585	0.00377238	1	2	3	33.99	development.unspecified	Cp	70	2	Cp	Cp	Cp	Cp	98.5	plastid stroma	plastid	-
	Solyc05g054960	MORF5	Multiple organellar RNA editing factor 5, chloroplastic [Solanum lycopersicum] per NCBI; DAG protein (AHRD V1 **-- B6TMC1_MAIZE)	MASKITKSISRTLYTYRFSTRFISSASSPSITQPPSLPAVGSSPQPSFLLSHSLLPTNPNGLKPFSLNTVRFRVNRSGSSPYTPGTGDRAPTEMAPLFPGCDYEHWLIVMDKPGGEGAHKQQMIDCYVQTLAKVLGSEEEAKKKIYNVSCERYFGFGCEVDEETANKMEGLPGVLFVLPDSYVDPEYKDYGAELFVNGEIIQRSPERQRRVEPVPQRNDRIRPNRYNRRRDNMR	At1g32580	XP_004239751.1	1	1	1	0.334	0.00215381	1	0	1	33.99	development.unspecified	Cp	73	4	Cp	M	Cp	Cp	59.6	-	-	-
	Solyc10g007180	MORF8	Multiple organellar RNA editing factor 8	MATRYLTRSLLTTLSRSYTTLSLSTPLPSSFSLLRFRPLIAVAANLRTFTPATLTAATSFRGFATRQTSSSLNDPNPNWSNRPPKETILLDGCDFEHWLVVMEKPEGDPTRDEIIDSYIKTLATIVGSEEEARMKIYSVSTRHYFAFGALVSEELSYKLKELPKVRWVLPDSYLDVKNKDYGGEPFINGQAVPYDPKYHEEWVRNNARANERNRRNDRPRNFDRSRNFERRREMQNPGSSMGGGPPNMRNAPPPNMGEMQQQQQPNMGGMQQQQPNMGGMHQQQQPNMGGMHQPGMGGPPPNYGGGPPRNYGGAPPNNYGGAPNNQYNGGPNNGGGMPYQTGPGPNQNYASGGNHYQNPNMPPPSQNYAPNTPGGNLHQNQNMPGRDPNYQ	At3g15000	XP_004248249.1	2	9	1	0.874	0.00563601	5	0	5	35.1	not assigned.no ontology	M	18	4	Cp	M	Cp	M	95.4	plastid mitochondria	mitochondrion	-
	Solyc12g014230	MORF8	Multiple organellar RNA editing factor 8, chloroplastic/mitochondrial	MASRSLLNAFKRSCNSFSLSTTPSTYSLHLLRPLHAVAANLRNVSPAPTPFSRGFATRQTSSSLNDPNPNWSNRPPKETILLDGCDFEHWLVVMEKPEGDPTRDEIIDSYIKTLATIVGSEEEARMKIYSVSTRHYFAFGALVSEELSYKLKELPKVRWVLPDSYLDVRNKDYGGEPFINGQAVPYDPKYHEEWVRNNARANERNRRNDRPRNFDRSRNFERRREMQNQPSQNPGSNMAAGGPPNMGGMQQPNMGGMHQQQGMGGPPPHAGGMHQQQGYGGPPPHAGGMQQPDMRGPPMQQQGYGGPPPHAGGMQQPDMRGPPMQQQGYGGPPPHAGGMQQPDMRGPPRGGGMQQPNMPPNMGGVPPNNYGMPNNARNFQYNGGGQNNGDTPYQTGPGP…	At3g15000	XP_004251891.1	1	2	0			0	2	2	16.6.2.2.1	'RNA processing.organelle machinery.RNA modification.C-to-U RNA editing.RNA editing factor *(MORF)'	Cp	na	4	Cp	M	Cp	Cp	72.1	plastid mitochondria	mitochondrion	-
	Solyc02g079770	MORF9	MORF9 (MULTIPLE ORGANELLAR RNA EDITING FACTOR 9)	MAALKLPSFSKTLNPNSQFQNLPKTPTFLLSLSYPFLTTSLSSIPPSTSSRFPVVRAISDGEYSSKRSSNSDERETIMLPGCDYNHWLIVMEFPKDPAPTREQMIDTYLDTLATVLGSMEEAKKNMYAFSTTTYTGFQCTVSEETSEKFKGLPGVLWVLPDSYIDVKNKDYGGDKYINGEIIPCQYPTYQPKQANRTRSKSKAYVRRRDGPPPERTRRAAAPESSS	At1g11430	XP_004232761.1	2	11	2	1.154	0.00744159	5	2	7	33.99	development.unspecified	Cp	56	1	Cp	Cp	Cp	Cp	99.6	plastid stroma	plastid	plastid
	Solyc01g111020	MRL1	Maturation of RBCL 1; Pentatricopeptide repeat-containing protein (AHRD V1 *-*- D7L4E9_ARALY); contains Interpro domain(s) IPR002885 Pentatricopeptide repeat	MDSIFSPKLSLLSCSPISSSLVPRRQFLSGSTHSLRPPGLHSRRRCRNIGFQFGGNTSRFVLRASLDSQTVVFASVVTISALTVVFLEFSKRNTNANAKFKEISAELTLALRRQIRHVMNWFPRHVFALINIQEEKSVKTQMKEVTKVSNEREDGEADVLQHDGTYLIQTFVTNNIESLDTNQLAPSSNGSLTLGASVPNEHTESDAVPSSFVADSNNIYLQENIQTTKMSNILTTEEENLRTTKMSNILTTEEVREPEPIAHTESDAVPSSFMEESKNINLQEHLHETKMSNILTTEEVSSERSVALFPTINIDNRTEKTKIMDQELMMKDELKKAHRFVAEDEVIIHNLIFRDSTREDLYSFFGASSKSLNGQDALTSHASRQGIGTFSPPSKAFSV…	At4g34830	XP_004231448.1	11	24	11	0.573	0.003695	5	2	7	35.1.5	not assigned.no ontology.pentatricopeptide (PPR) repeat-containing protein	Cp	63	2	Cp	Cp	Cp	C	73	plastid	plastid	-
	Solyc11g017430	mTERF12-like	Mitochodrial transcription termination factor family protein	MLLLSWSECESISTTANTLVGYVNCSSSITFNVTRGSWTSNYPFKKWTLHSTATDNIVLTEEEKKTWNDSRQALSALKFSPEEEDKILGKAFGHIHSPYWYEERKKEVPRLEVVNEILDYLRSLSLTDDDLTKLVKKFPEVLGCSLEDEMKTNVEILEKQWGIEGKTLRNLLLRNPKVLGYNVDCKGDCVAKCTRCWARF	At4g09620	XP_004250384.1	5	14	5	2.162	0.0139417	5	2	7	35.2	not assigned.unknown	Cp	59	5	-	possibly Cp	Cp	N	56.4	plastid stroma	plastid	-
	Solyc02g093940	mTERF5	mTERF domain-containing protein 1, mitochondrial (AHRD V1 *--- MTER1_HUMAN); contains Interpro domain(s) IPR003690 Mitochodrial transcription termition factor-related	MTSFMQLRIPNAKLAFFSRTSRVPLYRIVLSFPQKVFFCTAKYSESEVDGSFSLRLVPPTLVAAEKEEAKAVLTLFLKKQGLSNALAARAINRSESFIEHLVSRLHSVHKSRYLVGRELTTLEIRDALIPYLEALHEEYGSILVDVVESFPNPPVVEKIEETVEKVPIPVTPASPPSAVLDSKKLKALARVTDIGPTGKLPPHILYLVELGMDIERIRVITRKFPAFAYYSLEGKIKPVVEFLLDLGVPRSQIPTILSKRPQLCGISLSDNLIPTMTFLEELGVDKEQWAKVIYRFPALLTYSRPKLKATVDFLYEMGLSAECVSKVLTRCPNIISYSVEDKLRPATEYFRSMGVDVGVLLYRCPQTFGLSIEANIKPATEFFKDKGFSMTEIATMVSR…	At4g14605	XP_004231794.1	7	17	7	0.931	0.00600357	5	3	8	27.3.99	RNA.regulation of transcription	M	98	2	Cp	M	Cp	G	41.9	plastid	plastid	-
	Solyc03g081300	mTERF8 pTAC15	MTERF8-like. At4g38160-like protein (Fragment) (AHRD V1 *--- C0JEI4_9BRAS); contains Interpro domain(s) IPR003690 Mitochodrial transcription termition factor-related	MSTPTKSFRLSPSPSCLFPPIRTLFPSALLPCQKLAFYPQKQDKLPLHFLVPQDSTLLLLKCNALAINDSSTNSFVDSGVMLFSLFREIGFNETDTEALLDAHPVISLTPFESIRTRIHSLQSLGVSGLALSRLIVKRPDVLTAVEIDGLVSFLIEGDLELAGKIKSSQIEHLFNSTEPRFLEGFETKVRLLLEFGITQDTIVHVLNNANLTKAFCLKSFEDIERMLTFLNRFGGGDLILRRPALLNYDLDAQLIPRVGFLLELSGGDETGTATVLRKLPFVVAYSVNADHLKNADHVEFLKSYAGLSEEEIFRIVLVYPNMFSASRKRKLHPRIDFLKQCGLSSHDIFRFLIKIGYKKNTKELAMAMGAVTRTSCKNMQEVignaVFLNYGLTFDDIL…	At5g54180	XP_004235022.1	7	13	7	1.371	0.00884092	3	3	6	27.3.99	RNA.regulation of transcription	Cp	61	5	Cp	-	Cp	G	71.5	plastid nucleoid	plastid	-
	Solyc11g007160	ORRM1	organellar RRM-domain protein 1; RNA binding protein (AHRD V1 *--- B6TNV4_MAIZE); contains Interpro domain(s) IPR012677 Nucleotide-binding, alpha-beta plait	MEVTLPHSSSSALSIISTLSAKTLKPHFKFTLILPDKSSRSLFSSEFCCTCVISRNRATSITASSSSITSIYPSLPNSTSTQSHWMVLMETPPNGVSSKIEVIDYYVETLERVLGSEEDAQMCIYNASCNPPYGFCCDIDDAVADEIAGMPGVLSVIPDPDFDSMVKDYSYTNGQLSSPSTSYTEGSSLFPPGTSKHWLVRMARPSVGVIRKGPMVDYYVQVLTKVLGNEKDAQMCLYHVSWQANYGFCCELDEACAQELAGVPGVLSVQPDENFDSDNKDYGGGNLKLSVDSQESTASKEETDVRTKKLFVTGLSFYTSEKTLRAAFEGYGELVEVKIIMDKISKRSKGYAFIEYTTLEAASAALKEMNGKIINGWMITVDVAKTNPPKYSKGRPGTTR	At3g20930	XP_004249980.1	1	1	1	0.166	0.00107045	1	0	1	27.4	RNA.RNA binding	Cp	64	1	Cp	Cp	Cp	Cp	99.9	plastid	-	-
	Solyc09g011210	ORRM6	MAR-binding filament-like protein 1 (AHRD V1 **** MFP1_SOLLC); contains Interpro domain(s) IPR009053 Prefoldin; Encodes a DNA-binding protein that binds to plastid DNA non-specifically and is associated with nucleoids and thylakoid membranes.	MAGIVMAAAYSGATLIRYPQIVSACYAQSSSSATPINFNSSTKLFVSGLSFRTTEESLRKTFNHFGELVEVNLMMDKIANRPRGFAFIRYATEEESQKAIEGMHGKFLDGRVIFVEVAKSRSELrRNAGPKSQR	At1g73530	XP_004246450.1	2	3	2	0.778	0.00501695	3	0	3	27.4	RNA.RNA binding	Cp	72	4	Cp	Cp	Cp	Cp	92	plastid stroma	plastid	-
	Solyc08g066140	PNP1	Polyribonucleotide nucleotidyltransferase IPR012162 Polyribonucleotide nucleotidyltransferase	MVPTVGDIYKNCEIKSVAPYGVFVEIVPGREGLCHISELSANWLAKAEDAFKVGDRLDVKLIEINDKGQLRLSRRALLPDAETERQSTKPRSGSLSNDVSPKISDKGKLKKAVTVSKESENPLKEKTVPVNISSPVKEADKRSVTVLSVGY	At3g03710	XP_010325062.1	5	9	5	1.61	0.0103821	5	3	8	27.1	RNA.processing	-	-	2	-	-	Cp	N	98.48	plastid stroma	plastid	plastid
	Solyc08g066120	PNP1	Polyribonucleotide nucleotidyltransferase (AHRD V1 ***- D1R4D6_9CHLA); contains Interpro domain(s) IPR012162 Polyribonucleotide nucleotidyltransferase	MFANPSFHGRPLHFLPTVRNELCRSYAFPLQLHSTTYQFLASSTLENRRNRSRKRRRSLKQFSVRASVDPQDLSLLAQDTAGVPGSPSPFSVRIPVGDRHITVETGLIGRQASGAVTIRDGETIIYTTVCLADVPSEPADFFPLSVHYQERFSAAGRTSGGFFKREGRTKNADHEVLICRLIDRPLRPTMPKGFYHETQLLSWVLSYDGVHPPDALSVTAAGIAMALSQVPNSQVIAGVRIGLIGEKFILNPTIKEMENSKLDLLLAGTKEAILMIEGYCDFLPEDKLLEAVEVGQDAVRGICKEVEALVQKCGKPKMFDAIRLPPKELYKLVEEIAGSELVEVLQIKNKIPRRKALSSLEDNVISILSEKGYISTMEAFVSTETMPDLLEEEDEDEEV…	At3g03710	XP_010325062.1	11	48	11	3.642	0.0234855	5	3	8	27.1	RNA.processing	Cp	65	5	Cp	possibly Cp	Cp	M	99.8	plastid stroma	plastid	plastid
	Solyc03g078080	PUMPKIN	Plastid 55 UMP kinase, PUMPKIN; Uridylate kinase (AHRD V1 **** B6TC37_MAIZE); contains Interpro domain(s) IPR015963 Uridylate kinase, bacteria	MAISTSFCRPISSFNALSSPSLCYFKPLYNHLKLDPSLPLVKCCSSHIGQSPEHINGRQPDLSPIASFGVTMTNNGTSKPSYRWrRNAVLLKVSGEALAGDQAQNIDPKITMAIAREVAAVTRLGIEVAIVVGGGNIFRGSSWAGSSGLDRSSADYIGMLATVMNAIFLQATMESIGIPTRVQTAFRMSEVAEPYIrRNARAVRHLEKGRVVIFAAGTGNPFFTTDTAAALRCAEINAEVVLKATNVDGVYDDNPKHNPNARLQDNLTYHDVISKELSVMDLTAITLCQENNIPVVVFNLNKTGNIAKAIKGERVGTLIGDTWNTEAVVS	At3g18680	XP_004235078.1	1	3	1	0.166	0.00107045	3	1	4	23.4.3	nucleotide metabolism.phosphotransfer and pyrophosphatases.uridylate kinase	Cp	13	4	-	Cp	Cp	Cp	93.9	plastid stroma	plastid	-
	Solyc10g047000	RAE1	RNA export factor 1, mRNA export factor (AHRD V1 **-- B5X9N9_SALSA); contains Interpro domain(s) IPR020472 G-protein beta WD-40 repeat, region	MSLFGSGATAAANTNPNKSVEVQQPPSDSVSSLCFSPKANLLVASSWDNQVRCWEVMGSGTNVGAVPKASISHEQPVLCSTWKDDGTTVFSGGCDKQVKMWPLSGSQPVTVGMHDAPVKELAWIPEMSLLVTGSWDKTLRYWDLRQPNPAHVQQLPERCYALTVKHPLMVAATADRNLIVFNLQNPQTEFKRIVSPLKYQTRCLAAFPDKQGFLVGSIEGRVGVHHLDDAQQSKNFTFKCHREGNEIYSVNSLNFHPTHGTFATAGSDGSFNFWDKDSKQRLKAMSRCSQPIPCSAFNNDGSIYAYAVCYDWSKGAENHNPSTAKTNIYLHFPQDSEVKGKPRIGTSGRK	At1g80670	XP_004248810.1	1	1	1	0.155	0.00099952	1	2	3	27.1	RNA.processing	Cp	52	2	Cp	possibly Cp	Cp	C	98.8	-	-	-
	Solyc10g051390	RBG	RNA-binding glycine-rich protein-1b IPR015465 RNA recognition motif, glycine rich protein	MAAEVEYSCFVGGLAWATTDRTLSDAFSTYGEVVDSKIINDRETGRSRGFGFVTFKDEKSMKDAISGMNGQELDGRNITVNEAQARGSGGGGGGYGGGRREGGGGGYGGGGGYGGDRY	At2g21660	AFX73254.1	2	6	1	1.154	0.00744159	3	0	3	27.3.75	RNA.regulation of transcription	-	-	4	-	-	not Cp	ER	80.45	-	nucleus	-
	Solyc01g110550	RBF1	Ribosome-binding factor A (AHRD V1 **** B6TDG2_MAIZE); contains Interpro domain(s) IPR000238 Ribosome-binding factor A	MQNLVIQIPRLRPLPPSTQCLLPATMSLSPAKHINLRQFDSRELKTNSRSVNRRFIRCMANPRRVKMVAKQIRRELSDMLLTDKVLQYAVLPEAALGADRYLSSLTTISDVEVSTDLQVVKVYVSVFGDERGKEVALTGLKSKAKYVRSELGRRMKLRLTPEIRFIEDESLERGSRVLAILDRIKDENENKDSPNDGSSESDYDGDWEGDDPDDEGIIYVK	At4g34730	XP_004230968.1	5	16	5	2.981	0.019223	5	3	8	27.1	RNA.processing	Cp	57	4	Cp	-	Cp	Cp	64.7	plastid stroma	plastid	-
	Solyc08g042050	RH3	DEAD-box ATP-dependent RNA helicase 3 (AHRD V1 **** RH3_ORYSJ); contains Interpro domain(s) IPR011545 D/RNA helicase, DEAD/DEAH box type, N-terminal	MASSSSIIGVSSIYQTNPSLELSRRPTATPPLSLPFSIEKSNFHVHVRLRRPFLASAVVTPTSSVLSEEAFKGIGGFGKDSLNVSESEYDSEDEVEDNESNEDELSVSKLGLPHRLVDALEKRGITQLFPIQRAVLVPALEGRDIIARAKTGTGKTLAFGIPVLKKLSTDEEMRNTQRRGRLPKVLVLAPTRELANQVEKEMKESAPYLNTVCIYGGVSYATQQNALSRGVDVVVGTPGRLIDLINNNTLKLGEVEYLVLDEADQMLAVGFEEDVEVILEKLPPQRQSMLFSATMPGWVKKLSRKYLNNPLTIDLVGDQDEKLAEGIKLYALSATSTSKRSILGDLVTVYAKGGKTIVFTQTKRDADEVSMALSNSISSEALHGDISQHQRERTLNGFR…	At5g26742	XP_004244948.1	9	22	9	0.808	0.0052104	5	3	8	27.1.2	RNA.processing	Cp	54	1	Cp	Cp	Cp	C	83.9	plastid nucleoid	plastid	plastid
	Solyc08g080550	RH47	ATP-dependent RNA helicase DeaD (AHRD V1 **** C5ZVH9_9HELI); contains Interpro domain(s) IPR011545 D/RNA helicase, DEAD/DEAH box type, N-terminal	MPALVLTRALLLIGDSLAFRKATQFTRIAPSQGNVRFLSSSGSLTLASLGLKSEVKTVSANEKNKLQQGISTIEVPKSREKKRVSGNKQGLVKEKNPVDIMTAPFAAKSFSELGLPPLLVERLETEGFTIPTDVQAAAVPTVLKNHDVVIQSYTGSGKTLAYLLPILSRVGPLKEELPDGYETGNKIDIEAVIVAPSRELGMQIVREVEKLLGPANKKLVQQLVGGANRSRQEDALKKNKPDIVVGTPGRIAEISAAGKLPTHGCRYLVLDEIDQLLAFTFREDMKRILNADHVGRRPGARGGESNSPLVKRAARQTIMVSATVPFSVIRAARSWGCDPLLIQANKVVPLESVTPSGSVNIPGTPSTTDSSSSVQPMPDVQSLPPNLQHYYTITRIQHK…	At1g12770	XP_004245636.1	1	2	1	0.08	0.000515881	2	0	2	27.1.2	RNA.processing	M	45	3	Cp	ER	Cp	G	51.6	plastid nucleoid	mitochondrion	-
	Solyc09g025260	RHON1-like	Termination factor RHON1-like protein (RNA endonuclease)	MSSAIDFTLKNLPGFKSPEGRCLPCSGLSGRTVTSRGEYQQFSKVKILNLKSPYKSTSYMCSASSFSNHKRNPDFSRQNKHGFSRGRNRQNEDRDGYENIEESEMISSRNGPLLTTSNTSKFQATATPGPREKEIVELFRKVQAQLREKAAIKEEKKSEELQGKGKESETVDSLLKLLRKHSVQKGKKTSSSRSSNFVLDQPDKSNVFSEERASNLTELNSNVNHVAQESGTPFVNRPKSNFQRRSPVPRIKFQPIYHEGDKHVFDEMADDDTSKMYGSVDASDDEEHNHAGHDELAEMKLTELRAIAKSRGLRGYSKLKKLELIELLSADQV	At1g06190	NP_001334482.1	8	20	8	2.594	0.0167275	5	1	6	27.1.10.1.2	RNA.processing	Cp	24	5	Cp	-	not Cp	N	87.2	plastid nucleoid	plastid	-
	Solyc10g080040	RNC1	Ribonuclease 3 (AHRD V1 *-*- C3BNS5_9BACI); contains Interpro domain(s) IPR000999 Ribonuclease III	MDPKPDPNSTRFSSTYRLPLSPSLFPVSIFSTKNPAKTSFKFWKNLNFHQFYQFQQVSQTPFSLYITMELCSSFKPNSFDLSFSSSLSHFSIKTHVKSSNFGPRFHLLAVAVDPKGLPQNSPQRLLKELAERKKVVSPKRKVPPKRFILKPPLDDAKLAERFLNSPQLSLKSFPLLSSCLPCSRLNNADKTWIDEYLIEAKQCLGYPLESSESYGDDNPAKQFDTLLYLAFQHPKCERTNARHVRSGHSRLGFLGEYVLELAMCEFFLQRYPRESPGPMRERVYALIGKRYMPRWIKNASLQNLIFPYDDMDKLKRLDREPPVKSVFWALFGAIYLCFGMPEVYRVLFEVFGMDPEAEDCQPKLRRQLEDVDYVSVEFEGRKLSWQDVATYKPPEDALF…	At4g37510	XP_004249256.3	2	2	2	0.212	0.00136709	1	0	1	27.1.19	RNA.processing	-	-	5	Cp	-	not Cp	Cp	54.9	plastid stroma	plastid	-
	Solyc03g111260	RnJ	Ribonuclease J; Metallo-beta-lactamase family protein (AHRD V1 *-*- A3ERL5_9BACT); contains Interpro domain(s) IPR001279 Beta-lactamase-like	MAAAFSAISLCPYKLCHQLNPRKHFISCYTPSTSSIGIRGSKGPRKRPDKLEGAGRSIDDSVQRRMEQFYEGSDGPPLRVLPIGGLGEIGMNCMLVGNYDRYILIDAGIMFPGYDEPGVQKIIPDTTFIKKWSHKIEAVIITHGHENADHIGALPWVIPALDSHTPIFASSFTMELIKKRLKEFGIFVPSRLKVFKTRRKFTAGPFEVEPITVTHSIPDCSGIVLRCSDGTILHTGDWKIDESPLDGKVFDREALEELSKEGVTLMMSDSTNVLSPGRTLSETVVADSLLRRISAAKGRVITTQFASNIHRLGSVKAAADLTGRKLVFVGMSLRTYLDAAWKDGKAPIDPSTLVKVEDIDAYAPKDLLIVTTGSQAEPRAALNLASYGSSHSLKLNKED…	At5g63420	XP_010319059.1	15	36	15	1.26	0.00812513	5	3	8	33.99	development.unspecified	Cp	39	3	-	Cp	Cp	N	75.7	plastid stroma	plastid	plastid
	Solyc09g010870	RNR1	Exoribonuclease R/ribonuclease II (AHRD V1 **-* A5GLA4_SYNPW); contains Interpro domain(s) IPR001900 Ribonuclease II and R	MAVRAMNSCVIFRSAATPPLAVSRRCCCVRQLTAFSRHRNRSNSHSFLRCVPYPLSHVTVRNYSVQNLVEMVMEELASIHKRGRVRATSELESVSTGELLEDKLKKGTLQKGLLLEFKKDSERLLLAVALKPDGKKNWMVSDQNGITTSIKPQQVTFIVPGAENFEPTEISEFVQKAHDNLDPALLEFAWNELLEKNESVTVQELAEMIFGSAEPLETYCAHLLLSRDEVYFAVLESKGLSVYGPRTANQVDELLRRKLAKEASEKEFEELIQFLRSAKQMPHYDKPPRSSWKAEEKTWHKIESLEAFAIDSCKNDDQKKTAGMILKAMGQAKTSSAAVNLLIDIGYFPVHVNLDLLKLNLPTNADHRDEIISAAESLLSTSIDLDEADRIDLTSLKVY…	At5g02250	XP_019071225.1	17	47	17	3.87	0.0249558	5	3	8	27.1.19	RNA.processing	Cp	13	2	Cp	M	Cp	M	61.3	stroma	mitochondrion plastid	-
	Solyc08g077120	SOT1	Suppressor of thylakoid formation 11; Pentatricopeptide repeat-containing protein At5g46580, chloroplastic (AHRD V1 ***- PP420_ARATH)	MAAKFSTGLDIHCSIPYTSDTKLLYGSSSSSTKSSRLSIKRFTVLCNSTSKSPKPNLDLDSSRKKPSLSEQLKPLSNTILDDPPNQARILSKPKSTWVNPTRPKPSVLSLQRQKRSSYSYNPQIRDLKNFARRLSESHFSDDAFLAVLEDIPHPPTRDNALLVLNSLRPWQKTLFFFNWIKTRNLFPLETIFYNVAMKSLRFGRQFHQIEELAFEMIDSGV	At5g46580	XP_004245879.1	4	14	4	2.162	0.0139417	5	3	8	28.1	DNA.synthesis/chromatin structure	Cp	45	3	Cp	Cp	not Cp	N	78.2	plastid nucleoid	plastid	-
	Solyc08g077140	SOT1	Suppressor of thylakoid formation 11; Pentatricopeptide repeat-containing protein At5g46580, chloroplastic (AHRD V1 ***- PP420_ARATH)	MLNIYGSVGEKAMALFEEMSKVGIELNVMGCTCLVQCFGRAQRIDDLVKVFEVSVQRGVKPDDRLCGCLLSVVSYCKGDDADKVLACLQQANPRLVTFVKMLEDESTSYDIVKEEFRSILTNTSDDARRPFCNCLIDICRKRNRAERAHELLYLGTVYGLYPGLHTKTPEEWRLNVRALSVGAAQTAFEEWMRTLAKIVQSEEPLPEVLSANTGAGTHKFSQGLAFASHVEKFAAPFKQSEEKAGFFIATREDVVSWVHSKAAA	At5g46580	XP_004245879.1	4	9	4	0.896	0.00577787	5	3	8	28.1	DNA.synthesis/chromatin structure	S	-	5	-	-	Cp	C	99.89	plastid nucleoid	plastid	-
	Solyc11g008360	SVR1	Pseudouridine synthase family protein (AHRD V1 ***- D7LCF4_ARALY); contains Interpro domain(s) IPR006145 Pseudouridine synthase, RsuA and RluB/C/D/E/F	MAAMAAAVAAATSAFTSLHLTRATPYTrRNAHIRTFITSSLSSSSTKFNITFAPPKPKPKTKPEPAIPIINPNSDSNSDSVPNLDAEVGDQLYIPWIVRDEKGNLTLQSTPPARLLHEMANASTGKKKKKGKEVASKAATVVPTPEPKHSKAArRNAFYNENFRDPPQRLSKVLAAAGVASrRNASSEELIFQGRVTVNGSVCKTPQTKVDPARDVIYVNGNRLPKKLPTKVYLALNKPKGYICSSGEKETKSVMSLFDDFIKSWDKRHPGQPKPRLFTVGRLDVATTGLIIVTNDGEFTHQISHPSSNLSKEYIATIDGEVHKRHLIAISEGTIIDGVHCTPDNVELLPGQPDLSRPRLRIVVHEGRNHEVRELVKNAGLQLRALKRIRIGGFRLPAD…	At2g39140	XP_004250054.1	3	5	3	0.551	0.00355313	2	0	2	29.1.30	protein.aa activation.pseudouridylate synthase	Cp	81	2	Cp	Cp	Cp	Cp	97.8	plastid stroma	plastid	-
	Solyc03g120510	THA8	Thylakoid assembly 8; Pentatricopeptide repeat-containing protein (AHRD V1 ***- D7LN61_ARALY)	MASSLSTNLKFTLQHSSVTLPPPKSTTRRKISVRCGPRSNRGPLVKGRILSIEAIQAIQALKRAQRTDPSQIEAQVSKTLNRLIKTDLIAAYKELLRQDLCDLALKVFPAVQSECDVPDLGLYADMVLALTRTGFAEPIDELICDLEKVGRIECDDKSLVRLVRALVEGEQVESTVRVYELMKKSGWGSRFEIDEYVAKVLRRGFKRFGKEEMADEVDQQLQRSSRLV	At3g27750	XP_004235686.1	3	6	3	0.701	0.00452041	4	3	7	35.2	not assigned.unknown	Cp	34	1	Cp	Cp	Cp	Cp	93.8	plastid	plastid	-
	Solyc01g057780	VAR3	Zinc finger protein VAR3, chloroplastic (AHRD V1 **-- VAR3_ARATH); contains Interpro domain(s) IPR001876 Zinc finger, RanBP2-type	MASRFISLLGTPFPTFLNHLRCPSFLHLRRLACGSRRFTAYSHPHISPLSPSQQQFHAQPINNNTPLDSSSSSSSFTSHPWPEWRSLITLLTGNDQLPPAVEDSDSFVTYEELSQDFLRAATLCLDFARERPNFIGLLSRRDIEAVVSNGTPFLFKGALETARRMRAFLGIDGSTVLNADHGNANTVDLMKYILCYASKPSVSSEKNSLYSRDLIESSCRSLLRELVEVSCGAPAVNLPPAEQYDFSGRYGQTPRPIRQNIVMKRGDWICQKCNFMNFARNNKCLECEEPRPRRQLTGGEWECPQCYFFNYGRNVVCLRCDFGRPAGASPRTTHSSAEDGYNGNSAYSNGMDLKLAENEEKAQRWFSKISQMKNASDMDSAAADEDFPEIMPPRKGENK…	At5g17790	XP_004229106.1	1	2	1	0.059	0.000380463	2	0	2	30.5	signalling.G-proteins	M	6	4	Cp	possibly M	Cp	N	99.1	plastid mitochondria	plastid	-
	Solyc08g066180	YBEY	YBEY ENDORIBONUCLEASE	MLSRLSRTTPPPLAMAARVLPRSFHPTAASAMSVSTNSHFILPPSPTVAHISFGKSLSIIGRKFHYGLNCKEDRRWSVAGWSGKVFASQREYRKSRKRSLKKKEKELELSVNICIEEQLPDDPEIVDISEMLRLNVPMAMKFAFDNLKDSDYQTRDRAINDVGCFESVELSVLLCNDEFIRELNKDWRDVDSPTDVLSMSQHIPELELPILMLGDIVISVETAARQAEERGHSLLDEIRILLVHGLLHLLGFNADHEISDEAEAEMEKEEELLLKCLGWKGKGLIQSAYDAEAAGSSLLENIDRKKEGSLRFYRPKFSYIFCDMDGTLLNSKSQISSATAEALREATSRGVKVVIATGKTRPAAITLLKSVGLAGKDGIISEVSPGVFVQGLLVYGRQG…	At2g25870	NP_001310488.1	9	42	9	2.899	0.0186943	5	3	8	35.1	not assigned.no ontology	M	31	4	Cp	M	Cp	M	90.2	plastid	plastid	-
	Solyc09g015930	-	ATP-dependent RNA helicase (AHRD V1 **** D3TRA6_GLOMM); contains Interpro domain(s) IPR011545 D/RNA helicase, DEAD/DEAH box type, N-terminal	MSYVPPHLRNSAAGKTTTTPTINSIGANADHFSSKHTSRISSLEKSSNGYSSSARRSSLNYSLPNTFAVPDPIFPHWKPSERVLRLKSEQIEEIRLRLNVDVNVSPVSCPAPSPIESFPDMCLHASIMKDIEKHGYTAPTSIQAQAMPVALSGRDLLGCAETGSGKTAAFSIPMIQHCLAQQPLQRGDGPLALVLAPTRELAQQIEKEVTAFSMSLDSFKTAIVVGGTNISEQRSELRAGVHIVVATPGRLINADHLQQGNTSLGRIAFVVLDEADRMLDMGFEPQIREVMRNLPVKHQTLLFSATMPAEIEALAQDYLTNPVRIKVGKVSSPTANVSQTLEKVPENDKIDRLLDLLVEEAAQAEKSGHPFPLTIVFVERKTKCDEVAEALTQQGLLAT…	At3g58570	XP_004246279.1	2	3	1	0.166	0.00107045	2	0	2	27.1	RNA.processing	Cp	50	3	Cp	possibly Cp	Cp	M	81	-	-	-
	Solyc01g086900	-	RNA methyltransferase TrmH group 2 (AHRD V1 *-*- Q3M884_AVT); contains Interpro domain(s) IPR001537 tRNA/rRNA methyltransferase, SpoU; tRNA (cytidine(34)-2'-O)-methyltransferase (based on NCBI blast)	MERAGLKTLNTVVSPLHFRAKASIFRPLLLPQVVHNLHFPLLSSSSRLSPLRSLCVRSDASTMLNGAGGVAAQNKLLQVVLVSPQIPGNTGSIARTCAASAVGLHLVEPLGFPIDNTKLKRAGLDYWPYVVVKVHRSWDEFREYFMGQAGEKRLLAFTKRGIATHSDFSYKKGDWLVFGSETKGLPPEALLDCKSESLGGGTLRIPMVETYVRCLNLSVSVGIAVYEASRQINYEQLQCPPDTCMDTETSFVTEDIFA	At5g26880	XP_004229609.1	2	5	2	0.468	0.00301791	5	0	5	27.1	RNA.processing	M	66	4	Cp	Cp	Cp	Cp	77.4	-	-	-
	Solyc02g071280	-	Ribosome maturation factor rimM (AHRD V1 *-*- A4CTC3_SYNPV); contains Interpro domain(s) IPR011961 16S rR processing protein RimM	MQGSSALSCSSNSISAPVGLCCSQRLTLPFRNQRIGFLENPSSLKIFHFHRNTTLPLLNCTATEEIVEASETEGLFVETGYIYSVHGLQGEVRVKATTDFPELRFSQPGRRWLRQQVTGRDMIQEIELVEGRGHPGQKSWILKFHEINTIEQAQKLVGSALLVKNEDRPILEEGEFYTPDLVGMKVFLKETRELVGTVINVFNSGASDLLHVELLPNQNARPQLEGSASGPLVWVPFVEAIVPNIDLSKREMLITPPKGLLELNIRADERSKKERRQLEWKERKKSQKRLIAAKKILHEMEQNADHIFHGFRYGEKNQRSFLANQIVDVNSILLQHALQNKKIPYKRWSFPDFVNALQVNNTLKLSKEFFSKENVEHSSIVSKVQEQGHCLISSGKVAI…	At5g46420	XP_004232981.1	1	1	1	0.105	0.000677094	1	0	1	27.1	RNA.processing	Cp	21	2	Cp	possibly Cp	Cp	Cp	90.7	plastid stroma	plastid	-
	Solyc02g088540	-	tRNA guanosine-2'-O-methyltransferase (AHRD V1 *-*- B9L1B3_THERP); contains Interpro domain(s) IPR001537 tRNA/rRNA methyltransferase, SpoU	MSACKTLVRSSISFFQFQTRNSYQRSFSSHISSNFSFFRPLPLLSRNPAFRIEPCRDPSRRYGSTQGAISLETSEEMAVPRVAVESSEEKSKDTVEELLYNKDDVSKLMKMERRLDTEGLGHQERWFPYLDKVKAGSMYLSSSEILEAVTPYIMDSRKERFRHAVKNRTYSVCLVVEGLSDFGNVSATFRSADALGIQSVHVVACDSSKRYRENRHVSMGAEKWLDIELWDSVHECFTVLKSRGYRIATTHLGMDTVSVYDMDWSCPTAIVVGNELRGISDEALESSDLHCSIPMKGMVDSFNVSVAAGLLMHHAVCDRTSRLGCHGDLTREESRILLAEFSLRHNDNAIRIAQEYAERKIAELKSKL	At5g15390	XP_004232187.1	1	1	1	0.233	0.0015025	1	0	1	27.1	RNA.processing	Cp	74	4	Cp	possibly M	Cp	Cp	88.3	-	-	-
	Solyc03g121260	-	RNA methyltransferase; 23S rRNA (Uracil-5-)-methyltransferase RumA (AHRD V1 **** D8F5E6_9DELT); contains Interpro domain(s) IPR001566 23S rRNA methyltransferase/RumA	MAAAAATFGIRSVPSNIWLHKFGARTAAASIRSRSFTTLASLSPVEDTEDIQLNVIPKEDARELVSNTSNNNNYKSNKSYYPKRGQTLELVCESLAFKGKGVCKVADSGFVLMCDRALPGERFIGRVTRKKDNYAEVKKLKTITPHSDYVEAPCEYASHCGGCKTQSLSYEAQLKAKEQQVRDLVVHVGKFSEQEPEHAGVMKPIVPCDIQFHYRNKMEFSFGPKGWVPAEQLQEKSTDECVYALGLHAPGFFDKVLNVNKCLLQSDSANEVLATVQECWRDPELGLSPWNVHSHTGFLKHLMLRSGRNIETGLPELMVNFVTSSDNPECLRPLVEKIATIPEVVSIVNNVNTSIGNTSVGEKEYTLYGKSTITEILRGLTFQISANSFFQTNTRQADV…	At3g21300	XP_004235625.1	3	8	3	0.389	0.00250847	5	0	5	27.1.21	RNA.processing	Cp	27	4	Cp	M	Cp	Cp	96.1	-	-	-
	Solyc08g007950	-	RNA binding protein S1 domain (AHRD V1 *-*- B9CNP3_9ACTN); contains Interpro domain(s) IPR003029 Ribosomal protein S1, RNA- binding domain	MNNLSLDKTSTPNPLLSISSLHHSRISKSLCLPRKVLVFADKNDNSASITSGFLSKTHFSYKKVTVFADKDDNSSPVASGVLSRTHFSSKKVAVFASKDDNFSSITSGVLSRTVFSSRKTKKFVVFASKDDRNSNKLDQWDQMELKFGRLIGEDPKLTLAKIISRKTNPETSYLEIEESFEQKKGKTSGETVEVPFDASKQKKSLNSSNGLNLVRPVPKKGVKFEVDEKQPKTEGYKQSQPISRPEVSRKSSVPNVILRKPSLYSEEDESSKFKIKPNLTLKMGRELKPEKFSDVTLLKKPEPMRISSDDSEKNGQSSDKSSDATLLKKPEPMRISSDDSEKNGQSSDVLPVSSDDSEDASLTEVYASSSEPKNSLLLNKPEPSNLNLKIDPNKESSEV…	At1g12800	XP_004244605.1	26	67	26	2.424	0.0156312	5	2	7	27.3.23	RNA.regulation of transcription	Cp	37	5	Cp	-	Cp	N	99.7	plastid stroma	plastid	-
	Solyc12g015710	-	tRNA methyltransferase 4E; contains Interpro domain(s) IPR001678 Bacterial Fmu (Sun)/eukaryotic nucleolar NOL1/Nop2p	MQKIGSISDTVMEILNFPASSFFSDQHAHTIMPILFSGRTLHFPKLSATSSSSSESHNSKQVKFAKKISQNSATSVRRAGSGSPLRKTHKLNLEVSPHRAVSAVRLMRIELGGAFADLLNEQGKGSGDNEMGYVERTLGFRTRDLDDRDLRLVTEVVGGTIRWRRYLNADHLILSLCHDERTFRSMEPLLVQILRIGFYEITKLDMPPYAVVDESVRLAKVALRPGAGNLVNGILRKLAVLKESDSLPAVEVNGDDRQQARGLATLYSHPVWMVRRWTKYFGQDEAIKLMTWNNSYPSFSLRANTGKGLTGADLVSRLNMLKVPHEPSLYLDDFVRLKTGMQNVIQAGLLKEGFCAVQDESAGLVVSIVDPQPGENIIDCCAAPGGKTLFMASRLNGQG…	At3g13180	XP_004251938.1	1	1	1	0.068	0.000438499	1	0	1	27.4	RNA.RNA binding	-	-	5	Cp	-	Cp	C	73.2	plastid	plastid	-
	Solyc10g012410	-	Ribosomal RNA small subunit methyltransferase G	MGDLYALDFDGVLCDSCGESSLSALKAAKVRWPSLFNGVDSSLEDWIVDQMHVVRPVVETGYENLLLVRLLLESIIPSIRKSSVAEGLTVEGILENWSKIKPIIMAEWNEDRDFLIDLFGKVRDEWMDNDLATWIGANRFYPGVPDALKFASSKLYIVTTKQSRFADALLKGIAGITIPAERIYGLGTGPKVKVLKQLQEMPEHQGLKLHFVEDRLATLKNVIKESELDGWNLYLGDWGYNTQKEREEAAGISRIRVLELSDFSNKLK	At2g45990	XP_004248047.1	8	37	8	6.197	0.0399615	5	3	8	35.2	not assigned.unknown	-	-	3	-	-	Cp	C	92.85	plastid stroma	plastid	plastid
	Solyc05g006530	-	ATP-dependent RNA helicase; INCREASED SIZE EXCLUSION LIMIT 2 (IDE2), pigment defective 317	MTTLPILFASLSPSNSIASRSPSPFLHIQTLRFCSVKSIQKNPFTSTSRIFYKFPSSIFPAESQDEDEEDDEEDDDDEEAAEEYDEVYAEVSDGDEDSEDELESSVTDEMLNIEESRRQRVEKLRNEVREFGDGIIDVNELASIYTFRIDKFQRLSIQAFLRGSSVVVSAPTSSGKTLIAEAAAVATVARGRRLFYTTPLKALSNQKFREFCETFGESNVGLLTGDSAVNRDAQILIMTTEILRNMLYQSVGIASSDGGLLHVDVIVLDEVHYLSDISRGTVWEEIVIYCPKEVQLICLSATVANPDELAGWIGQIHGRTELVTSSKRPVPLTWHFSTKTALLPLLDDKGTSMNRKLSLNYLQYDESGSELYREEGSKRRKSRRRENDVRPLSKNDISN…	At1g70070	XP_004238735.1	11	26	11	0.778	0.00501695	5	3	8	28.1	DNA.synthesis/chromatin structure	Cp	35	1	Cp	possibly Cp	Cp	N	73.7	stroma	plastid	-
	Solyc01g081290	-	Pentatricopeptide repeat-containing protein similar to At3g03580 (AHRD V1 ***- D7L173_ARALY); contains Interpro domain(s) IPR002290 Serine/threonine protein kinase	MWNSIRDSGSSMSNLKTRFSLEECSRRLKKRCKEDDGLCCEVTVGSCGSRTRLAATAPPSGSSSISLCGRGVKRKIGCIEAATQMGRKNKIEDDYVMGEALGKGKFGSVFLCRSKATGVEFACKTLPKGEETVHKEVEIMQHLSGHPGVVTLHSVYEDAESFHLVMELCSGGRLIDEMTKEGRYSEQKSANIFKDLMLVIQYCHDMGVVHRDIKPENILLTASGKIKLADFGLAMRIANGQSLSGLAGSPAYVAPEVLTGDYGQKADIWSAGVLLHGLLVGVLPFQGDSLDALFEAIKSMQLDFHTEKWQSVSKLARDLLERILTRDVAARITAEEVLSHPWMMFYTERTLKMVSVRLKPKHFSGTPSQIPAITSRLESDGKKRCCKSLNGETNDLRCG…	At3g03580	XP_004229586.1	1	2	1	0.038	0.000245044	2	1	3	35.1.5	not assigned.no ontology.pentatricopeptide (PPR) repeat-containing protein	Cp	80	4	-	possibly Cp	Cp	C	100	plastid	plastid	-
A Proteins were identified by acetone preparations and/or the gel method. For emPAI and Mol% calculations, only the data from the acetone prepartions were used. Proteins identified solely by the gel method have data for the number of peptides, PSMs and unique peptides.
B Names of tomato proteins were based on the literature, NCBI annotation (identified in BlastP searches), and/or SolyGenomics descriptor. In a small number of cases, tomato protein names were assigned based on NCBI annotations and the Arabidopsis homolog.
C Some Sol Genomics descriptors were updated when NCBI annotations and Arabidopsis gene annotations were aligned.
D Target P's subcellular locations are: chloroplast (Cp), mitochondria (M), secretory (S), and no predicted location is indicated by a dash (-).
E ChloroP was used to predict the presence of a chloroplast transit peptide (Y) and the lack of a predicted transit peptide is indicated with a dash (-).
F Predotar's predicted subcellular locations were: chloroplast/plastid (Cp),endoplasmic reticulum (ER) or mitochondrion (M). For proteins with localization predictions that were less clear, Predotar provided categorized of possibly Cp, M and ER. Proteins with unresolved locations or that did not have a homolog detected by Predotar are indicated with a dash (-).
G WoLF PSORT's and YLoc's predicted subcellular locations were: chloroplast/plastid (Cp), cytosol (C), cytoskeleton (Cy), endoplasmic reticulum (ER), extracellular (EX), golgi apparatus (G), mitochondrion (M), nucleus (N), peroxisomes (P), plasma membrance (PM), and vacuole (V). Proteins with no chloroplast location in WoLF PSORT are indicated by not Cp.The number of proteins predicted to be in t…

## Sheet: Table S6F-Signaling
Table S6F. Signaling proteins
Gene and protein descriptors						ProteomicsA					Times detected			Bin codes		Algorithms								Databases
Tomato Gene ID	Gene nameB	DescriptionC	Protein Sequence	Arabidopis homolog	Tomato proteinB NCBI accession	Peptides	PSMs	Unique Peptides	emPAI	Mol%	Acetone samples	Gel samples	Total	Bincode	Name	TargetP D ver.1	Transit peptide length	TargetP (reliability class)	ChloroP E	Predotar F	WoLF PSORT G	YLoc G	YLoc % Confidence	PPDB	SUBA4	plprot
Solyc07g066430	-	GTP-binding protein (AHRD V1 **** B0JHK9_MICAN); contains Interpro domain(s) IPR004396 Conserved hypothetical protein CHP00092	MARMACSQLLPSMAIPLKSSFLNGSSHQWLRLSESTHPVVLIKRRFSVAKISMSLRAGIVGLPNVGKSTLFNAVVENGKAQAANFPFCTIEPNVGIVAVPDTRLHVLSDISKSKRAVPASIEFVDIAGLVKGASQGEGLGNKFLSHIREVDSILQVVRCFEDNDIVHVNGKVEPKADIDVINLELIFSDLDQIEKRMEKLKKGRAKDSQAKVKEEAEKSALEKIQQALLDGKPARSVSLSEFEKDAITQLCLLTMKPVIFVANVAESEVAEPENNPHVKEVIKKAAELNSGVVTISAQVESELSELPLEERIEYLKSLGVNESGLGNLIRETYGLLGLRTYFTSGEKETKAWTILTGMTAPQAAGVIHSDFEKGFIRAETVAYDDFVSAGSFAAAREKG…	At1g56050	XP_004243987.1	14	65	14	11.743	0.075725	5	3	8	30.5	signalling.G-proteins	Cp	74	2	Cp	possibly Cp	Cp	M	76.97	plastid stroma	plastid	plastid
Solyc04g009300	BPG2	GTP-binding protein BRASSINAZOLE INSENSITIVE PALE GREEN 2, chloroplastic [Solanum lycopersicum]	MALLLSTSTAAAAAAAVSSHLSLNSIFETKNILVPHLQFTGFTQKPHKKICQQKVPFLVLSVLKGSQSRTKRRSDSSSSSVSRKDSNFKLLLSEGRDNDENYGCICPGCGIFMQDEDPNHPGYYKKKKVEESLEDFVDDEDVVVGEGGDDEEEEEFGDFIEGELEEGGSEEMGSGSEDGFDDWDSEEWELGLEEAEGDLKELDGFLPAGVGYGNITQEVLEKGKKKRVSKSERKRMAREAAKGEKEEVTVCARCHSLRNYGQVKNELAENLIPDFDFDQLITSRLMKPTGKADATVVVMVVDCVDFDGSFPKRAAKSLFKALEQSQDGLKQSKKLPKLVLVATKVDLLPSQISPARLDKWVRHRAKANGAPKLSGVYMVSSRKDLGIRNLLAFIKELAG…	At3g57180	XP_004236836.1	3	7	3	0.259	0.00167017	4	0	4	35.2	not assigned.unknown	Cp	77	5	Cp	Cp	Cp	C	0.3996	plastid	plastid	-
Solyc11g010200	GRF1	14-3-3 protein 6; 14-3-3 protein beta_alpha-1 IPR000308 14-3-3 protein	MASPREENVYMAKLAEQAERYEEMVEFMEKVVAAADGAEELTVEERNLLSVAYKNVignaARRASWRIISSIEQKEESRGNENADHVASIKEYRSKIESELTSICNGILKLLDSKLIGSAATGDSKVFYLKMKGDYHRYLAEFKTGAERKEAAENTLSAYKAAQDIAELAPTHPIRLGLALNFSVFYYEILNSPDRACNLAKQAFDEAIAELDTLGEESYKDSTLIMQLLRDNLTLWTSDMQVHIYFFLLMMELMRSKKLHLNQMIMNEQQ	At4g09000	NP_001234097.1	4	18	1	1.371	0.00884092	3	0	3	30.7	signalling.14-3-3 proteins	-	-	2	-	-	Cp	C	99.91	-	cytosol	plastid
Solyc04g074510	GRF1	14-3-3 protein beta_alpha-B IPR000308 14-3-3 protein	MAVAPTAREENVYMAKLAEQAERYEEMVEFMEKVSNSLGSEELTVEERNLLSVAYKNVignaARRASWRIISSIEQKEESRGNEEHVNSIREYRSKIENELSKICDGILKLLDSKLIPSATSGDSKVFYLKMKGDYHRYLAEFKTGAERKEAAESTLTAYKAAQDIASAELAPTHPIRLGLALNFSVFYYEILNSPDRACNLAKQAFDEAIAELDTLGEESYKDSTLIMQLLRDNLTLWTSDMQVIIMIMMMVLMKSRKIPNLKKKIEGN	At4g09000	NP_001234677.2	4	18	1	1.254	0.00808644	3	2	5	30.7	signalling.14-3-3 proteins	Cp	-	2	-	-	Cp	C	89.61	-	cytosol	plastid
Solyc02g063070	GRF7	14-3-3 protein beta_alpha-1 IPR000308 14-3-3 protei; General regulatory factor	MADSSREENVYLAKLAEQAERYEEMIEFMEKVAKTADVEELTVEERNLLSVAYKNVignaARRASWRIISSIEQKEESRGNENADHVNTIKEYRSKIEAELSKICDGILSLLESNLIPSASTAESKVFYLKMKGDYHRYLAEFKTGTERKEAAENTLLAYKSAQDIALAELAPTHPIRLGLALNFSVFYYEILNSPDRACNLAKQAFDEAISELDTLGEESYKDSTLIMQLLRDNLTLWTSDDDVGDDIKEASKPESGEGQQ	At3g02520	NP_001234007.1	4	16	1	1.371	0.00884092	4	3	7	30.7	signalling.14-3-3 proteins	_	-	2	-	-	Cp	N	73.36	-	cytosol	-
Solyc08g008170	CDPK19	Calcium dependent protein kinase 19 (AHRD V1 **** B9GKB5_POPTR); contains Interpro domain(s) IPR002290 Serine/threonine protein kinase	MGNCNSLSSDQATTTSGGGGGGGAPSTPSTTGIRIIPSSQPPPPRPLSGIGRVLGRPMEDVRSIYIFGGELGRGQFGVTYLVTNKKTRQQFACKSIATRKLINKDDVDDVRREVQIMHHLTGHRNIVELKGTFEDKHHVHLVMELCAGGELFDRIIAKGHYSERAAAGVCRQMVTVVHNCHSMGVMHRDLKPENFLFLSSDETSPLKATDFGLSVFFKPGDVFKDLVGSAYYVAPEVLRREYGPEADIWSAGVILYILLSGVPPFYGENDQSIFDAVLRGHLDFSSDPWPSVSSSAKDLVKKMLRSDPRERISAAEVLNHPWMREDGDASDKPLDIAVLSRMKQFRAMNKLKKVALKVIAENLSEEEIIGLKEMFKSIDTDDSGTITFEELKAGLTKMG…	At4g23650	XP_004244622.1 Hu et al (2016)	1	2	1	0.186	0.00119942	1	0	1	30.3	signalling.calcium	Cp	62	5	Cp	-	Cp	C	99.8	-	-	-
Solyc07g006160	-	AFG1-like ATPase family protein	MRKVLQSARQIKSALRYRKDNVINSLVKRQYFSTNISHGCICKLSYNGGITRHSQPYYMLSRAMFAGVATVSNGVETRGGPLVEYERRIAEGDLLDGDACQVGTLQELQRLYDQLIEKAEVCRLDKYASSDKASRSRWLWSRLLPQSSYAPVKGLYLYGGVGTGKTMLMDLFFDQLPGNWRKKRIHFHDFMLNVHSRLQKHKGVPDPLEVVAGEISDEAILLCLDEFMVTDVADALILNRLFKQLFMNGAILVATSNRAPDNLYERGLQRDLFLPFIATLKERCVVREIGSAVDYRKLTSAEQGFYFIGKDISSVIKKQFQMLVGDAQPVPQEVEVVMGRKLQVPLGANGCALFSFEELCDRPLGAADYFGLFKNFHTLALDGVPIFGLHNKTAAYRFV…	AT4G30490	XP_010323216.1	1	2	1	0.089	0.000573918	2	0	2	35.2	'not assigned.not annotated'	M	-	2	-	possibly M	Cp	M	66.22	plastid mitochondria	mitochondrion	-
Solyc01g079680	RanGAP2	Ran GTPase activating protein (Fragment) (AHRD V1 **-* A7M8K5_NICBE); contains Interpro domain(s) IPR003590 Leucine-rich repeat, ribonuclease inhibitor subtype	MDATTDNSQRRPFSIKLWPPSENTRKMLVERMTNNLSSPTIFTRKYRSLSKEEAAKNAEEIEDAAFTIANQHYEKEPDGDGSSAVQLYARECSKLILEILKKTPKSEDKEISISEVVPTVQETFFDISKGKRAFIEAEEAQELLKPLKEPGNSYSKICFSNRSFGIDAARIAGPILATLKDQLKEVDLSDFVAGRNEAEALDVMNIFSEALEGSNLKFLNLSDNALGEKGVRAFGKLLQSQTNLEELFLMNDGISQEAANAVSELVPSTEKLKILHFHNNMTGDEGAVAIAEIVKRSPLLEDFRCSSTRVGSEGGSALCEALGMCSHLKKLDLRDNMFGPEVGLVLSKALSQHENLKEIYLSYLNLEDEGAIAIANALKDSAPSLAVLEMAGNDITAEA…	At5g19320	NP_001334927.1	17	42	17	5.31	0.0342416	5	0	5	30.5	signalling.G-proteins	Cp	25	4	-	-	Cp	N	89	-	nucleus cytosol	plastid
Solyc05g006170	-	Leucine-rich repeat, ribonuclease inhibitor subtype; CHT, LRR and PYD domains-containing protein 5 (AHRD V1 *--- LP5_BOVIN); contains Interpro domain(s) IPR003590 Leucine-rich repeat, ribonuclease inhibitor subtype [PREDICTED: protein NLRC3]	MGSSSTFSLCSHPTVNFEFNGRKVGYGLQKSLSSSSSYCLIHISPISISSRRRKCVQLRRVTVRAASSSSTGSRRSMSTRRVYKESQAQTPALPVDRIVSFVVPAGAFVVISFVLWKLVEKILLPKPANTTSEESKSTQGLKWSIAAGTNLLPGFGAKIERESKLRLNDFAKELRSFSIVDMSGRNFGDEGLFFLAESLAYNQTAEEVNFAANGITADGLKAFDGILQSNIALKTLNLSGNAIGDEGAKCLCDILANNSGIQKLQLNSTGLGDEGAKAIGEMLKKNSTLRVLELNNNLIDYSGFSGLAGSLLENKTLQSLHLNGNYGGALGAAALAKGLESNKSLRELYLQGNSVGDEGVRALISGLSLRKGKLVLLDLANNSITARGAFHVAEYVKKS…	At1g10510	XP_004238713.1	3	4	3	0.218	0.00140578	3	2	5	33.99	development.unspecified	Cp	9	2	Cp	Cp	Cp	Cp	0.9499	plastid	plastid	plastid
A Proteins were identified by acetone preparations and/or the gel method. For emPAI and Mol% calculations, only the data from the acetone prepartions were used. Proteins identified solely by the gel method have data for the number of peptides, PSMs and unique peptides.
B Names of tomato proteins were based on the literature, NCBI annotation (identified in BlastP searches), and/or SolyGenomics descriptor. In a small number of cases, tomato protein names were assigned based on NCBI annotations and the Arabidopsis homolog.
C Some Sol Genomics descriptors were updated when NCBI annotations and Arabidopsis gene annotations were aligned.
D Target P's subcellular locations are: chloroplast (Cp), mitochondria (M), secretory (S), and no predicted location is indicated by a dash (-).
E ChloroP was used to predict the presence of a chloroplast transit peptide (Y) and the lack of a predicted transit peptide is indicated with a dash (-).
F Predotar's predicted subcellular locations were: chloroplast/plastid (Cp),endoplasmic reticulum (ER) or mitochondrion (M). For proteins with localization predictions that were less clear, Predotar provided categorized of possibly Cp, M and ER. Proteins with unresolved locations or that did not have a homolog detected by Predotar are indicated with a dash (-).
G WoLF PSORT's and YLoc's predicted subcellular locations were: chloroplast/plastid (Cp), cytosol (C), cytoskeleton (Cy), endoplasmic reticulum (ER), extracellular (EX), golgi apparatus (G), mitochondrion (M), nucleus (N), peroxisomes (P), plasma membrance (PM), and vacuole (V). Proteins with no chloroplast location in WoLF PSORT are indicated by not Cp.The number of proteins predicted to be in t…
