# Supplementary material for: The tomato chloroplast stromal proteome compendium elucidated by leveraging a plastid protein-localization prediction Atlas
Source: Front Plant Sci. 2023 Aug 28;14:1020275. doi: 10.3389/fpls.2023.1020275 (PMC10493611; doi:10.3389/fpls.2023.1020275)
Supplement: Supplementary file 9 [file Table_7.xlsx]

## Sheet: Table S7A.TCA 
Table S7A. TCA cycle
Gene and protein descriptors						ProteomicsA					Times detected			Bin codes		Algorithms								Databases
Tomato Gene ID	Gene nameB	DescriptionC	Protein Sequence	Arabidopis homolog	Tomato proteinB NCBI accession	Peptides	PSMs	Unique Peptides	emPAI	Mol%	Acetone samples	Gel samples	Total	Bincode	Name	TargetP D ver.1	Transit peptide length	TargetP (reliability class)	ChloroP E	Predotar F	WoLF PSORT G	YLoc G	YLoc % Confidence	PPDB	SUBA4	plprot
Solyc02g086820	CA1	Carbonic anhydrase (AHRD V1 ***- Q5NE20_SOLLC); contains Interpro domain(s) IPR015892 Carbonic anhydrase, prokaryotic-like, conserved site	MSTASINNCLTLSPAQASLKKPTRPVAFARLGNSSSSSSIPSLIRNEPVFAAPTPIINPIVREEMAKESYDQAIAALEKLLSEKAELGPVAAARVDQITAELKSADGGKAFDPVEHMKAGFIHFKTEKYDTNPALYGELAKGQSPKFMVFACSDSRVCPSHVLNFQPGEAFMVRNIANMVPAYDKVRYSGVGAAIEYAVLHLKVENIVVignaHSACGGIKGLMSLPEDGSESTAFIEDWVKICLPAKAKVLANADHGGKEFAHQCTACEKEAVNVSLGNLLTYPFVREGLVKKTLALKGGYYDFVKGGFELWGLEFGLSPPLSV	At3g01500	NP_001234048.1	18	434	18	49.119	0.316745	5	3	8	8.3	TCA / org transformation.carbonic anhydrases	Cp	62	1	Cp	Cp	Cp	Cp	100	plastid stroma	plastid	plastid
Solyc09g010970	CA5	Carbonic anhydrase (AHRD V1 ***- B9S9I2_RICCO); contains Interpro domain(s) IPR001765 Carbonic anhydrase	MILRTQVRFLEVDKPHLRFLNLPRYKLLNRSCNSTPKLKAWKGPMTLTKEVVDEKEMSAVtheESNEFTTLKHRFLNFKKDKYLKNLEHYQSLADEQSPKFLVISCADSRVCPSNILGFQPGEAFIVRNIANLVPPYETDPSEVKAALEFSVNTLKVENILIIGHSRCGGIRALMSMDDETNSSFIRSWVINGKAAKTRTKAVASNLSFNADHQCKHCEKESINCSLMNLLTYPWIKEKVNKGELLIHGGYYDFVDCSFEKWTLENNSLVDDQVSIKNREFWN	At4g33580	XP_004246439.1	1	2	1	0.155	0.00099952	2	0	2	8.3	TCA / org transformation.carbonic anhydrases	M	9	2	-	M	Cp	Cp	54.6	stroma	plastid	-
Solyc03g071590	NADP-MDH	Malate dehydrogenase (AHRD V1 **** Q5NE17_SOLLC); contains Interpro domain(s) IPR011273 Malate dehydrogenase, NADP-dependent, plants	MAVAEFIPSSSLTKTTSLYPSQFLHVSTHKPRLSLTPLRRSKICCSVISNAPVPVAKEPTKKTECFGVFCLTYDLKAEEETSSWKKLINVSVSGAAGMIANHFLFKLASGEVFGPDQPVALKLLGSERSIQALEGVAMELEDSLFPLLREVSIGIDPYEVFQDAEWALLIGAKPRGPGMERAGLLDINGQIFAEQGKALNAVASRNVKVIVVGNPCNTNALICLKNAPDIPAKNFHALTRLDENRAKCQLALKAGVFYDKVSNMTIWGNHSTTQVPDFLNAKINGFPVKDVIRDSKWLEEEFTEKIQKRGGVLIQKWGRSSAASTAVSVVDAMRSLVTPTPEGDWFSTGVYTNGNPYGIAKDIVFSMPCRSKGDGDYELVKDVLMDDYLRSRIKKSEDE…	At5g58330	NP_001234009.2	15	67	3	4.623	0.0298115	5	3	8	8.2.9	TCA / org transformation.other organic acid transformatons.cyt MNADH	Cp	44	1	Cp	Cp	Cp	Cp	100	plastid stroma	plastid	plastid
Solyc11g007990	NADP-MDH	Malate dehydrogenase (AHRD V1 **** Q5NE17_SOLLC); contains Interpro domain(s) IPR011273 Malate dehydrogenase, NADP-dependent, plants	MAVAEFIPSSSSLTKKASFYSSQLSNVSTKISHQRRLSFKPLLRTHNHSQICCSVTSKEAQATTVVQTDDPKKKSECYGVFCLTYDLKAEEETSSWKKMITVSVSGAAGMIANHLLFKLASGEVFGPDQPIALRLLGSERSIQALEGVAMELEDSLYPLLREVNIGIDPYEVFQDAEWALLIGAKPRGPGMERAGLLDINGQIFAEQGKALNAVASRNVKVIVVGNPCNTNALICLKNAPNIPAKNFHALTRLDENRAKCQLALKAGVFYDKVSNVTIWGNHSTTQVPDFLNAKINGLPVKEVIKDTKWLEEEFTEKVQKRGGVLIQKWGRSSAASTAVSIVDAIRSLVTPTPEGDWFSTGVYTNGNPYGIAQDIVFSMPCRSKGDGDYELVKEVIFDD…	At5g58330	NP_001234056.1	19	114	7	11.115	0.0716753	5	3	8	8.2.9	TCA / org transformation.other organic acid transformatons.cyt MNADH	Cp	52	1	Cp	Cp	Cp	Cp	88.8	plastid stroma	plastid	plastid
Solyc03g115990	pNAD-MDH	Malate dehydrogenase (AHRD V1 **** O48906_MEDSA); contains Interpro domain(s) IPR010097 Malate dehydrogenase, NAD-dependent, eukaryotes and gamma proteobacteria	MAATSATTLSVGSTTSLGCKGSSISQSKAFGVKFNSKNNIRSFSGLKAATTVSCESESSFIGKESLAALKQSITPKAQKGNRGYVSCVQPQASYKVAILGASGGIGQPLALLVKMSPLVSELNLYDIANVKGVAADLSHCNTPSQVSDFTGASELANCLKGVNVVVIPAGVPRKPGMTRDDLFNINANIVKTLVEAVADNCPDAFIHIISNPVNSTVPIAAEVLKRKGVYDPKKLFGVTTLDVVRANTFVAQKKNLRLIDVDVPVVGGHAGITILPLLSKTKPSTTFTDEEVQELTVRIQNAGTEVVEAKAGAGSATLSMAYAAARFVESSLRALDGDSDVYECAFVQSDISELPFFASRIKIGKNGVEALISSDLQGLSEYEQKALDALKPELKSSIE…	At3g47520	XP_004235981.1	10	69	10	4.623	0.0298115	5	3	8	8.2.9	TCA / org transformation.other organic acid transformatons.cyt MNADH	Cp	53	2	Cp	Cp	Cp	Cp	98.1	plastid stroma	plastid	plastid
Solyc09g091070	pNAD-MDH	Malate dehydrogenase IPR010097 Malate dehydrogenase, NAD-dependent, eukaryotes and gamma proteobacteria	MSPLVSSLHLYDIANVKGVAADLSHCNTPAQVFDFTGASELANSLKGIDVVVIPAGVPRKPGMTRDDLFNINIVKSLVEAVADNCPDAFIHIISNPVNSTVPIAAEVLKQKGVYDPKKLFGVTTLDVVRANTFVAQKKNLKLIDVDVPVignaGHAGITILPLLSKTRPSTTFTDEEVQELTVRIQGTEVVEAKAGAGSATLSMAYAAARFVESSLRALDGDADVYECSYVQSDLTELPFFASRVKLGRNGIEALISSDLRGLTEYEQKALEALKIELKASIEKGIAYAQKQTVSA	At3g47520	XP_004247802.1	8	54	3	5.105	0.0329197	5	3	8	8.2.9	TCA / org transformation.other organic acid transformatons.cyt MNADH	S	-	4	-	-	Cp	C	94.26	plastid stroma	plastid	plastid
Solyc09g090140	cNAD-MDH1	Malate dehydrogenase IPR011274 Malate dehydrogenase, NAD-dependent, cytosolic	MAKDPVRVLVTGAAGQIGYALVPMIARGVMLGADQPVILHMLDIPPAAEALNGVKMELVDAAFPLLKGVVATTDAVEACTGVNVAVMVGGFPRKEGMERKDVMSKNVSIYKSQASALEKHAAPNCKVLVVANPANTLILKEFAPSIPEKNITCLTRLNADHNRALGQISERLSVQVSDVKNVIIWGNHSSSQYPDVNHATVSTPAGDKPVRELVADDAWLNGEFISTVQQRGAAIIKARKLSSALSAASSACNADHIRDWVLGTPEGTFVSMGVYSDGSYNVPAGLIYSFPVTCKNGEWSIVQGLPIDEFSRKKLDLTAEELSEEKALAYSCLA	At1g04410	XP_004247734.1	6	20	5	2.162	0.0139417	5	3	8	8.2.9	TCA / org transformation.other organic acid transformatons.cyt MNADH	-	-	4	-	-	Cp	ER	93.25	-	vacuole	plastid
Solyc08g066360	NADP-ME	Malic enzyme IPR012302 Malic enzyme, DNA-binding	MESTLKELTNGESVLDIKDKCGVAGGVEDIYGEDRATEDQTITPWTFSVASGYSLLRNDPHYNKGLAFTEAERDAHYLRGLLPPTVSSQQLQEKKVMHNLRQYQVPLQRYMAMMDLQERNERLFYKLLIDNVEELLPVVYTPTVGEACQKYGGIFRRPQGLFISLKEKGKILEVLKNWPEKSIQVIVVTDGERILGLGDLGCQGMGIPVGKLSLYTALGGVRPSVCLPITIDVGTNNQKLLDDEFYIGLKQKRATGQEYAELLEEFMSAVKQNYGEKVLIQFEDFANHFELLAKYRTTHLVFNDDIQGTASVVLAGLIASLKLLGGTLANADHTFLFLGAGEAGTGIAELIALEITRKTSVPLEEARKKIWLVDSKGLIVSSRVESLQHFKKPWAHNAD…	At1g79750	XP_010325075.1	2	5	1	0.172	0.00110915	1	0	1	8.2.10	TCA / org transformation.other organic acid transformatons.malic	-	-	1	-	-	Cp	N	53.12	plastid	-	-
Solyc12g044600	NADP-ME	NADP-dependent malic enzyme, chloroplastic (AHRD V1 ***- MAOC_FLAPR); contains Interpro domain(s) IPR012302 Malic enzyme, DNA-binding	MFSLNGTSFTNNSLSGVSRCLNQSSRRVSAPMVVVAAVNSNGKPGDGSVSVLVENALTESPAPVEMEVKSTVTGGVQDVYGEDSATEDQSITPWTLSVASGFSLLRNPHYNKGLAFSERERDTHYLRGLLPPVVISHDLQVKKMMNSIRKYDVPLQRYMAMMDLQEMNERLFYKLLIDNVEELLPIVYTPTVGEACQKYGSIFRRPQGLFISLKEKGKIHEVLKNWPEKKIQVIVVTDGERILGLGDLGCQGMGIPVGKLSLYTALGGIRPSACLPVTIDVGTNNENLLNDEFYIGLRQRRATGQEYSELLDEFMYAVKQNYGEKVLIQFEDFANHNAFDLLAKYGTSHLVFNDDIQGTASVVLAGLMAALNLVGGSLSEHTFLFLGAGEAGTGIAELI…	At1g79750	NP_001234458.2	10	35	9	2.675	0.0172498	5	3	8	8.2.10	TCA / org transformation.other organic acid transformatons.malic	Cp	35	2	Cp	-	Cp	P	57.1	plastid	-	-
Solyc07g052350	ACO	Aconitate hydratase, cytoplasmic [Solanum lycopersicum]	MYSNTARKYSSSAASSLLRASSSVTRPLASTSTAAHAPCRAGAASGNQQRYSSTLRSLRCSVPRWSHGVDWKSPISLTAQIRTAAPALNGFHRKLATMAAENPFKGILTGLPKPGGGEFGKFYSLPALNDPRIDKLPYSIRILLESAIRNCDNFQVKKEDVEKIIDWENSAPKLVEIPFKPARVLLQDFTGVPAVVDLACMRDAMNNLGSDSDKINPLVPVDLVINADHSVQVDVTRSENAVQANMELEFQRNKERFAFLKWGSNAFQNMLVVPPGSGIVHQVNLEYLGRVVFNREGLLYPDSVVGTDSHTTMIDGLGVAGWGVGGIEAEAAMLGQPMSMVLPGVVGFKLSGNLRNGVTATDLVLTVTQMLRKHGVVGKFVEFYGEGMSGLSLADRATI…	At2g05710	XP_004243472.1	22	93	15	4.109	0.026497	5	3	8	8.1.3	TCA / org transformation.TCA.aconitase	Cp	64	4	Cp	possibly M	Cp	M	64	-	mitochondrion	plastid
Solyc12g005860	ACO	Aconitase/iron regulatory protein 2 // aconitase 3 [Arabidopsis thaliana]	MYVSSSVHIKPNFFTSFPVSKSLSKSTGAYCSSGYSSLSFSSTFRSLRWRYGVDWKSPISLTSQIRTAAVTPVLNNFRRKLTTMASGNPFKGILTSLPKPGGGEFGKYYSLPALNDPRIDKLPYSIRILLESAIRNCDNFQVKKEDVEKIIDWENTSPKLAEIPFKPARVLLQDFTGVPAVVDLACMRDAMNKLGSNADKINPLVPVDLVINADHSVQVDVARSENAVQANMELEFQRNKERFAFLKWGSNAFRNMLVVPPGSGIVHQVNLEYLGRVVFNREGLLYPDSVVGTDSHTTMIDGLGVAGWGVGGIEAEATMLGQPMSMVLPGVVGFKLSGKLRSGVTATDLVLTVTQMLRKHGVVGKFVEFYGDGMGELSLADRATIANMSPEYGATMGFF…	At2g05710	XP_004251517.2	19	77	12	3.16	0.0203773	5	3	8	8.1.3	TCA / org transformation.TCA.aconitase	Cp	66	1	Cp	Cp	Cp	Cp	97.6	-	mitochondrion	plastid
Solyc01g073740	CSY4	Citrate synthase (AHRD V1 ***- O24135_TOBAC); contains Interpro domain(s) IPR010109 Citrate synthase, eukaryotic	MVFYRSVSLLSKLRSRAVQQSNVSNSVRWLQVQTSSGLDLRSELQELIPEQQDRLKKIKSEYGKVQLGNITVDMVLGGMRGMTGLLWETSLLDPDEGIRFRGLSIPECQKVLPAAKPGGEPLPEGLLWLLLTGKVSAIKRASEFIVSGIAESGYYPWYVNHVYKTIDALPVTAHPMTQFATGVMALQVQSEFQKAYEKGIHKSKFWEPTYEDSMNLIAQVPLVAAYVYRRMYKNGDTIPKDESLDYGANFAHMLGFSSSEMHELMRLYVTIHSNADHEGGNVSAHTGHLVASALSDPYLSFAAALNGLAGPLHGLANQEVLLWIKSVVEECGENISKEQLKDYVWKTLNSGKVVPGFGHGVLRKTDPRYTCQREFAMKHLPKDPLFQLVSKLYEVVPPV…	At2g44350	XP_004229342.1	5	8	5	1.054	0.00679674	2	2	4	8.1.2	TCA / org transformation.TCA.CS	M	25	2	Cp	M	Cp	M	96.2	-	mitochondrion	-
Solyc02g086610	ICDH	Isocitrate dehydrogenase-like protein (AHRD V1 **** Q8LPJ5_ARATH); contains Interpro domain(s) IPR004790 Isocitrate dehydrogenase DP-dependent, eukaryotic	MAGVASFVSSSSASASSIASKKFYFQVNSNRQLFNNRVSLTTRIPNASIRCFASTSGPTSKILVQNPIVEMDGDEMTRVIWKMIKDKLIYPYLELDTKYYDLGILNRDATDDQVTVESAEATLKYNVAVKCATITPDETRVKEFGLKSMWKSPNGTIRNILNGTVFREPILCTNIPRIVPGWKKPICIGRHAFGDQYRATDAIINGPGKLKMVFVPENGESPTELDVYDFKGPGIALAMYNVDQSIRAFAESSMSMAFSKKWPLYLSTKNTILKKYDGRFKDIFQEVYEEKWKQQFEEHSIWYEHRLIDDMVAYVLKSEGGYVWACKNYDGDVQSDLLAQGFGSLGLMTSVLLSSDGKTLEAEAAHGTVTRHFRLHQKGQETSTNSVASIFAWTRGLGH…	At5g14590	XP_004232313.1	14	66	14	2.924	0.0188555	5	3	8	8.1.4	TCA / org transformation.TCA.INADH	Cp	50	2	Cp	Cp	Cp	Cp	86.2	-	cytosol	-
Solyc04g008590	PDH E1-beta	Pyruvate dehydrogenase E1 component subunit beta (AHRD V1 ***- B6TQ36_MAIZE); contains Interpro domain(s) IPR005475 Transketolase, central region	MAAIIQGIGAATALTSASSLDTKKTFFSNSRRSLSERKGRTFVVRSDGGLSYGLNGRGGRAEQLITNAVATKEDTAAASTSSKPGHELLLFEALREGLEEEMDRDPAVCVMGEDVGHYGGSYKVTKGLAPKYGDLRVLDTPIAENSFTGMGIGAAMTGLRPVIEGMNMGFLLLAFNQISNNCGMLHYTSGGQFKIPVVIRGPGGVGRQLGAEHSQRLESYFQSIPGIQMVACSTPYNAKGLMKAAIRSDNPVILFEHVLLYNLKERIPDEEYVLNLEEAEMVRPGEHVTILTYSRMRYHVMQAAKTLVNKGYDPEVIDIRSLKPFDLHTIGNSVKKTHRVLIVEECMRTGGIGASLTAAITENFHDYLDAPIICLSSQDVPTPYAGTLENWTVVQPPQI…	At2g34590	XP_010319368.1	4	12	1	2.162	0.0139417	4	1	5	8.1.1.1	TCA / org transformation.TCA.pyruvate NADH.E1	Cp	45	1	Cp	Cp	Cp	M	69.3	plastid	plastid	plastid
Solyc08g016750	PDH E1-beta	Pyruvate dehydrogenase E1 component subunit beta (AHRD V1 ***- B6TQ36_MAIZE); contains Interpro domain(s) IPR005475 Transketolase, central region	MAAIIQGIGAATALTSANSLDTKKSLFANSRRSLSERKGRLFVARSDGRLSSGLNGRGGRAEQLITNAVAAKEDAAAASTSFKPGHELLLFEALREGLEEEMDRDPTVCVMGEDVGHYGGSYKVTKGLAPKYGDLRVLDTPIAENSFTGMGIGAAMTGLRPVIEGMNMGFLLLAFNQISNNCGMLHYTSGGQFKIPVVIRGPGGVGRQLGAEHSQRLESYFQSIPGIQMVACSTPYNAKGLMKAAIKSDNPVILFEHVLLYNLKERIPDEEYVLNLEEAEMVRPGEHVTILTYSRMRYHVMQAAKTLVNKGYDPEVIDIRSLKPFDLYTIGKSVKKTHRVLIVEECMRTGGIGASLTAAITENFHDYLDAPIVCLSSQDVPTPYAGTLENWTVVQPPQI…	At2g34590	XP_004244808.1	4	6	1	1.31	0.00844756	1	3	4	8.1.1.1	TCA / org transformation.TCA.pyruvate NADH.E1	Cp	27	1	Cp	Cp	Cp	M	92.7	plastid	plastid	plastid
Solyc12g009410	PDH E1-alpha	Pyruvate dehydrogenase E1 component alpha subunit (AHRD V1 **** Q5N030_SYNP6); contains Interpro domain(s) IPR017597 Pyruvate dehydrogenase (acetyl-tRNAansferring) E1 component, alpha subunit, subgroup y	MAASASSFAANNFLQPINSTRSIDNNNKKTLLGNQLKDSSFFLGSAKKLYMKKPFSSQNSKSRSNGVFAVSEVVKNKKPNTDSSLSNLLITKDEGLELYEDMVLGRAFEDMCAQMYYRGKMFGFVHLYNGQEAVSTGFIKLLKKEDSVVSTYRNADHVHALSKGVPARQVMSELFGKTTGCCRGQGGSMHMFSKEHNVLGGFAFIGEGIPVATGAAFTSKYRREVMKEADCNADHVTMAFFGDGTCNNGQFFECLNMAALWKLPIIFVVENNLWAIGMSHLRSTSDPEIWKKGPAFGMPGVHVDGMDVLKVREVAKEAVARARRGDGPTLVECETYRFRGHSLADPDELRDPAEKNHYAARDPISALKKYMFENNLASEAELKAIDKKIDELVEEAVEF…	At1g01090	XP_004251714.1	10	28	1	2.325	0.0149928	5	0	5	8.1.1.1	TCA / org transformation.TCA.pyruvate NADH.E1	Cp	70	1	Cp	Cp	Cp	M	60.5	envelope-inner-peripheral-stromal-side	plastid	plastid
Solyc05g009530	PDH-E2	Dihydrolipoyllysine-residue acetyltransferase component of pyruvate dehydrogenase complex (E2 subunit) (AHRD V1 **** A5GUY8_SYNR3); contains Interpro domain(s) IPR001078 2-oxoacid dehydrogenase acyltransferase, catalytic domain	MASLQSSAISFSSSLGRFSSTRTMLPQKPRKYKLPVVESKIREIFMPALSSTMTEGKIVSWVKSEGDVLSKGESVVVVESDKADMDVETFYDGILAVIVVNEGETALVGAPIGLLAETEDEIAEAKAKAKGQSGGSSSGSESTPEPQSPVVVSSDEPKKIVATPNAKKLAKQHKIDINKVKGTGPFGRITSEDVEKAAGITPAPSKSISPPPPPPAAAPAAGAPAKAAPVSLPEIPGSTVVPFTTMQVAVSKNMVESLSVPTFRVGYPVITDALDALYLKVKKKGVTMTALLAKAAAMALAQHPVVNSSCKDGKSFTYNSSINIAVAVAINGGLITPVLQDADKLDLYLLSQKWKELVEKARAKQLQPHEYNSGTFTLSNLGMFGVDRFDAILPPGQGA…	At3g25860	XP_004238940.1	9	17	7	2.162	0.0139417	5	1	6	11.1.31	lipid metabolism.FA synthesis and FA elongation.pyruvate NADH	Cp	37	2	Cp	Cp	Cp	Cp	81.7	plastid	plastid	plastid
Solyc11g017250	PDH-E2	Dihydrolipoyllysine-residue acetyltransferase component of pyruvate dehydrogenase complex (AHRD V1 ***- A5GUY8_SYNR3); contains Interpro domain(s) IPR001078 2-oxoacid dehydrogenase acyltransferase, catalytic domain	MSHLLQSTFIPTTPTTLRRRSVFPTTHLRKTHVVESKIREIFMPALSSTMTEGKIISWMKTEGDKLAKGESVVVVESDKADMDVESFYDGYLASIIVPEGSSAPVGSPIALLAESEDEISLAKSKTPTSTSTSSPAATASVTEEVSTVAAAVAVPVTATSSSDAAPVKMASSIHPASEGGKRVVASPYAKKLAKELGLDLRGVVGSGPNGRIVAKDVEAAAGSAPIGVAAAAKPSGGAPAAPAVELGTTVPFTTMQSAVSRNMVESLAVPTFRVGYTITTNALDALYKKVKSKGVTMTALLAKATALALVQHPVVNSSCRDGKSFTYNSSINIAVAVAIDGGLITPVLQDADKVDLYSLSRKWKELVDKARAKQLQPHEYTTGTFTLSNLGMFGVDRFD…	At1g34430	XP_004250376.1	5	7	3	1.154	0.00744159	2	0	2	8.1.1.2	TCA / org transformation.TCA.pyruvate NADH.E2	Cp	34	4	Cp	Cp	Cp	M	100	envelope-inner-peripheral-stromal-side	plastid	plastid
Solyc01g100360	PDH-E3	Dihydrolipoyl dehydrogenase (AHRD V1 ***- B5LAW5_CAPAN); contains Interpro domain(s) IPR006258 Dihydrolipoamide dehydrogenase	MQSSISLSLSSPSTICRSDSSAAVSNVNVNLLNPRSLRFCGLRREAFGLNSSLSTHRIQSLSNATRRPCSNRIVASSAGNGAASKGFDYDLVIIGAGVGGHGAALHAVEKGLKTAIIEGDVVGGTCVNRGCVPSKALLAVSGRMRELQNEHHMKSFGLQVAAAGYDRQGVANADHANNLASKIRSNLTNSMKSLGVDILTGFGTVLGPQKVKYGDTVITAKDIIIATGSVPLVPKGIEVDGKTVITSNADHALKLEFVPQWIAIVGSGYIGLEFSDVYTALGSEVTFVEALDQLMPGFDPEIGKLAQRVLINPRKIDYHTGVFASKITPAKDGKPVTIELIDAKTKELKDTLEVDAALIATGRAPFTQGLGLENINVQTQRGFVPVDSRMRVIDASGEL…	At4g16155	XP_004230295.1	12	31	8	2.03	0.0130905	5	1	6	8.1.1.3	TCA / org transformation.TCA.pyruvate NADH.E3	Cp	74	1	Cp	Cp	Cp	M	96.3	plastid	plastid	plastid
Solyc05g053100	PDH-E3	Dihydrolipoyl dehydrogenase (AHRD V1 ***- B9RZN2_RICCO); contains Interpro domain(s) IPR006258 Dihydrolipoamide dehydrogenase	MYFSSVLSPSNCSLVKRSHQNQLEKLSFTPLKNLRFCGLRNEILAFEFLKLNRCETQRVCNFRRSKIVVSASVAENGSAPTSFDYDLVIIGAGVGGHGAALHAVEKGLKTAIIEGDVignaGTCVNRGCVPSKALLAVSGRMRELKNEHHLKALGIQVSGAGYDRQAVANADHANNLASKIRNNLTNSLKALGVDILTGVGTITGPQRVKYGKVGFSGSEVTARDIIIATGSVPFVPRGIEVDGKTVITSNADHALKLEFVPEWIAIVGSGYIGLEFSDVYTALGSEVTFIEALDQLMPGFDPEISKLAQRILVNPRKIDYHTGVFATKITPAKDGRPVVIELTDAKTKEVKDTLEVDAALIATGRAPFTNGLGLENINVLTQRGFIPVDERMRVVDAD…	At3g16950	XP_004239903.1	14	58	10	4.248	0.0273933	5	3	8	8.1.1.3	TCA / org transformation.TCA.pyruvate NADH.E3	Cp	53	2	Cp	Cp	Cp	M	99	plastid	plastid	plastid
Solyc05g056270	-	PEP carboxylase protein family	MNSASISSIEFRTFSNLPSRRTAYLTHRRVAETLHQSASSLPERVGSSSSKAGRKSFIRYTVSASYGDKESGSVNSNEFTSPAKALRKLLESPGVHQGPACFDALSAKLVERAGFDFCFTTGFGISAARLGLPDAGLISYGEMVAQGLEITQAVSIPVignaDGDNGYGNAMNVKRTVKGYIRAGFGGIILEDQVSPKACGHTRGRKVVSREEAIMRIKAAVDARKESGSDIVIVARTDARQAVSFEEAIWRARALADAGADVLFIDALASKEEMKAFCDVYPLVPKLANMLEGGGKTPIFTPIELEELGYKLVAYPLSLIGVSIGAMQDALSAIKGGRIPSPGSMPSFEELKEILGFNTYYEEEKRYATTSSQLPSRKGDFSSNSNEYGVQPGIQADR…	At2g43180	XP_019069432.1	10	21	10	1.649	0.0106336	5	3	8	35.2	not assigned.unknown	Cp	37	2	Cp	Cp	Cp	Cp	75.3	plastid stroma	plastid	plastid
A Proteins were identified by acetone preparations and/or the gel method. For emPAI and Mol% calculations, only the data from the acetone prepartions were used. Proteins identified solely by the gel method have data for the number of peptides, PSMs and unique peptides.
B Names of tomato proteins were based on the literature, NCBI annotation (identified in BlastP searches), and/or SolyGenomics descriptor. In a small number of cases, tomato protein names were assigned based on NCBI annotations and the Arabidopsis homolog.
C Some Sol Genomics descriptors were updated when NCBI annotations and Arabidopsis gene annotations were aligned.
D Target P's subcellular locations are: chloroplast (Cp), mitochondria (M), secretory (S), and no predicted location is indicated by a dash (-).
E ChloroP was used to predict the presence of a chloroplast transit peptide (Y) and the lack of a predicted transit peptide is indicated with a dash (-).
F Predotar's predicted subcellular locations were: chloroplast/plastid (Cp),endoplasmic reticulum (ER) or mitochondrion (M). For proteins with localization predictions that were less clear, Predotar provided categorized of possibly Cp, M and ER. Proteins with unresolved locations or that did not have a homolog detected by Predotar are indicated with a dash (-).
G WoLF PSORT's and YLoc's predicted subcellular locations were: chloroplast/plastid (Cp), cytosol (C), cytoskeleton (Cy), endoplasmic reticulum (ER), extracellular (EX), golgi apparatus (G), mitochondrion (M), nucleus (N), peroxisomes (P), plasma membrance (PM), and vacuole (V). Proteins with no chloroplast location in WoLF PSORT are indicated by not Cp.The number of proteins predicted to be in t…
										0.696672

## Sheet: Table S7B.Calvin cycle
Table S7B. Calvin cycle
Category	Gene and protein descriptors						ProteomicsA					Times detected			Bin codes		Algorithms								Databases
	Tomato Gene ID	Gene nameB	DescriptionC	Protein Sequence	Arabidopis homolog	Tomato proteinB NCBI accession	Peptides	PSMs	Unique Peptides	emPAI	Mol%	Acetone samples	Gel samples	Total	Bincode	Name	TargetP D ver.1	Transit peptide length	TargetP (reliability class)	ChloroP E	Predotar F	WoLF PSORT G	YLoc G	YLoc % Confidence	PPDB	SUBA4	plprot
Calvin Cycle Enzymes	Solyc09g011810	CFBP1	FBPase1, Fructose-1 6-bisphosphatase class 1 (AHRD V1 **** D0MHZ8_RHOM4); contains Interpro domain(s) IPR000146 Fructose-1,6-bisphosphatase	MAATATTSYLSALDKKTPFLFALDKKTPFLCPKNSTKRRSFNGGVKCMAIETASGVTQTKKKSGYELQTLTSWLLRQEQAGVIDAELTIVISSISMACKQIASLVQRAGISNLTGVQGAVNIQGEDQKKLDVVSNEVFSNCLRSSGRTGIIASEEEDVPVAVEESYSGNYIVVFDPLDGSSNIDAAVSTGSIFGIYSPNDECLADLGDDSTLDNIEQKCIVNVCQPGTNLLAAGYCMYSSSVIFVLTLGNGVFSFNLDPMYGEFVLTQENVQIPKSGKIYSFNEGNYQLWDDKLKKYIDDLKDPGPSGKPYSARYIGSLVGDFHRTLLYGGIYGYPRDRKSKNGKLRLLYECAPMSFIVEQAGGKGSDGHQRVLDIQPTEIHQRVPLYIGSTEEVEKLE…	At3g54050	XP_004246365.1	11	184	11	12.111	0.078098	5	3	8	1.3.7	PS.calvin cycle	Cp	46	5	Cp	Cp	Cp	Cp	92.6	plastid stroma	plastid	plastid
	Solyc10g086730	CFBP1	Fructose-1 6-bisphosphatase class 1 (AHRD V1 ***- D0MHZ8_RHOM4); contains Interpro domain(s) IPR000146 Fructose-1,6-bisphosphatase	MAEALLGTKCSSSSSISHLSPNFHLFPTNIKRSQHLIHGNFSPNSRIrRNAEAASLEGAKTAPAQIKKPKNRYEMVNLTTWLLQQEQAGNIDAELAIVLSSISLACKQIASLLQRSSIVNITGTQGTVNIQGEDQKKLDVISNELFCNCLRSSGRTGIIASEEEDVPVAVEETYSGNYIVVFDPIDGSANIDIALTTGSIFGIYGPDQQCLVDMDDDSTIDQAREKCIVSVCQPGSNLVAAGYCLYSSSVVYTLSVGNGVYAFTLDPAYGEFVLTHEDIKIPKAGRIYSFNEGNYDLWDEKLQSYLNADHLKQPGPNGKPYSGRYIGCLVGEIHRMLLYGGIYGNPKNKNSKNGNLRLLYECAPMSYIIEQAGGKATDGNQRILEIMPEQIHQRTPIFI…	At3g54050	NP_001315602.1	7	49	7	7.577	0.0488604	5	3	8	1.3.7	PS.calvin cycle	Cp	61	1	Cp	Cp	Cp	Cp	99.9	plastid stroma	plastid	plastid
	Solyc01g106010	FBP-like	Fructose-1 6-bisphosphatase class 1 (AHRD V1 ***- D3PE46_DEFDS); contains Interpro domain(s) IPR000146 Fructose-1,6-bisphosphatase	MASSPFSGGLINSRVDSPIAIGCKNASVDSANSGFSTLMEYMGKGGVDVGDDLVLLFGHLEYASKKIAALVACPFNSSLNNNVAIGNTGTSSDRDKPKPLDIVSNEIILSSLRNSGKVAVMASEEDECPVWITDDGPFVVVMDPLDGSRNIDASIPTGTIFGIYrRNALVEINADHLPVEEKALLNCLQSGSKLVAAAYVLYSSATILCASFGSGTHAFTLNADHTTGDFLLTHPNINIPPRGQIYSVNDARYFDWPEGLRQYIDTIRQGKGQHPKKYSARYICSLVADFHRTLLYGGVAMNPRNHLRLVYEANPLSFLAEKAGGRGSDGKNRILSIQPVKLHQRLPLFLGSLEDIEELQSYGDVQQKVNPGYDV	At5g64380	XP_004230574.1	5	12	5	1.894	0.0122135	5	3	8	1.3.7	PS.calvin cycle	-	-	3	-	-	Cp	Cp	96.6	stroma	plastid	-
	Solyc01g110360	FBA1	Fructose-bisphosphate aldolase (AHRD V1 ***- B0FPD8_SOLTU); contains Interpro domain(s) IPR000741 Fructose-bisphosphate aldolase, class-I	MASASLLKSSPVLDKSEFLKGQSLRQPSVSVVRCHPTNATSLTVRAASSYADELIKTAKTVASPGRGILAMDESNATCGKRLAsignalENTEANRQAYRTLLVSAPGLGQYISGAILFEETLYQSTVDGRKIVDVLIEQNIVPGIKVDKGLVPLAGSNDESWCQGLDGLASRSAAYYQQGARFAKWRTVVSIPNGPSALAVKEAAWGLARYAAISQDNGLVPIVEPEILLDGEHGIDRTFEVAQKVWAEVFFYLAENNVMFEGILLKPSMVTPGAECKDRATPQQVADYTLSLLKrRNAIPPAVPGIMFLSGGQSEVEATLNLNAMNQAPNPWHVSFSYARALQNTCLKTWGGQPENVKAAQDTLLVRAKANSLAQLGKYTGEGESDEAKQGMFVKGY…	At4g38970	NP_001333903.1 Cai et al (2016)	20	296	9	18.953	0.122219	5	3	8	1.3.6	PS.calvin cycle	Cp	45	2	Cp	Cp	Cp	Cp	75.5	plastoglobules plastid stroma	plastid	plastid
	Solyc05g008600	FBA4	Fructose-bisphosphate aldolase (AHRD V1 ***- B9SJY9_RICCO); contains Interpro domain(s) IPR000741 Fructose-bisphosphate aldolase, class-I	MASSSLVKLNASSSSWIGQQSFNQRSGSSCRLPVSNrRNAVSVIRAAGSYTDELIKTAKTIASPGRGILAIDESNATAGKRLAsignalDNTEANRQAYRQLLLTTPGLGDYISGSILFEETLFQSTTDGKKFVDVLRDQKIVPGIKVDKGLVPLPGSNNESWCQGLDGLASRSAEYYKQGARFAKWRTVVSIPCGPSALAVKEAAWGLARYAAISQDNGLVPIVEPEILLDGNADHPIERTLEVAERVWAEVFYYLAENNVVFEGILLKPSMVTPGAEHKEKATPETIAKYTLTMLrRNARVPPAVPGIMFLSGGQSEVEATLNLHEMNQSPNPWHVSFSYARALQNTVLKTWQGRPENVDAAQRALLIRAKANSLAQLGKYSAEGESEEAKKGMFVK…	At2g01140	XP_004238877.1 Cai et al (2016)	12	101	8	3.467	0.022357	5	3	8	1.3.6	PS.calvin cycle	Cp	43	3	Cp	Cp	Cp	Cp	99.8	stroma	plastid	plastid
	Solyc02g062340	FBA2	Fructose-bisphosphate aldolase (AHRD V1 ***- Q9SXX4_NICPA); contains Interpro domain(s) IPR000741 Fructose-bisphosphate aldolase, class-I	MASASLLKTSPVINKTDFIKGQALRQPSVSVNVVRSHPSGLTVRASSYADELVKTAKTVASPGRGILAMDESNATCGKRLDsignalENTEANRQAYRTLLVSAPGLGNYISGAILFEETLYQSTVDGKKIVDVLLEQNIVPGIKVDKGLVPLAGSNNESWCQGLDGLASRSAAYYQQGARFAKWRTVVSIPNGPSALAVKEAAWGLARYAAISQDNGLVPIVEPEILLDGEHNIDRTFEVAQQVWAEVFFYLAENNVMFEGILLKPSMVTPGAECKERATPEQVADYTLKLLQRRIPPAVPGIMFLSGGQSEVEATLNLNAMNQSPNPWHVSFSYARALQNTCLKTWGGRPENVEAAQKALLTRASANSLAQLGKYTGEGESEEAKEGMFVKGYVY	At4g38970	NP_001333905.1 Cai et(2016)	15	356	6	17.957	0.115796	5	3	8	1.3.6	PS.calvin cycle	Cp	44	2	Cp	Cp	Cp	Cp	94.1	plastoglobules plastid stroma	plastid	plastid
	Solyc02g084440	FBA3	Fructose-bisphosphate aldolase (AHRD V1 ***- Q9SXX4_NICPA); contains Interpro domain(s) IPR000741 Fructose-bisphosphate aldolase, class-I	MASASLLKTSPVLDKTEFVKGQSLRLPSVSVRCQPSALTVRASSYADELVKTAKTIASPGRGILAMDESNATCGKRLASIGMENTEANRQAFRTLLVSVPGLGEYISGAILFEETLYQSTVEGKKMVDVLVEQNIVPGIKVDKGLVPLAGSNNESWCQGLDGLASRSAAYYQQGARFAKWRTVVSIPNGPSALAVKEAAWGLARYAAISQDNGLVPIVEPEILLDGEHNIDRTFEVAKQVWAEVFFYLAQNNVMFEGILLKPSMVTPGAECKDRATPQQVADYTLSLLRQRIPPAVPGIMFLSGGQSEVEATLNLNAMNQSPNPWHVSFSYARALQNTCLKTWSGRPENVKAAQDALLVRAKANSLAQLGKYTGEGESDEAKKGMFVKGYVY	At4g38970	NP_001294934.1 Cai et al (2016)	19	316	10	41.813	0.269632	5	3	8	1.3.6	PS.calvin cycle	Cp	41	3	Cp	Cp	Cp	Cp	77.5	plastid stroma	plastid	plastid
	Solyc04g009030	GAPA-1	Glyceraldehyde-3-phosphate dehydrogenase (AHRD V1 **** D7UNZ5_BRARC); contains Interpro domain(s) IPR000173 Glyceraldehyde 3-phosphate dehydrogenase	MAALSVANTSLKVNNKGFSEFSGLRTSSAVPFGRKTNDDLFSVAGLQTSAIGGRKNKRIVTEAKLKVAINGFGRIGRNFLRCWHGRKDSPLDVIAINDTGGVKQASHLLKYDSTLGIFDADVKPVGTDGISVDGKVIQVVSNRDPVNLPWGELGVDLVIEGTGVFVDREGAGKHIQAGAKKVLITAPGKGDIPTYVVGVNAELYSHDEPIISNASCTTNCLAPFVKVLDQKFGIIKGTMTTTHSYTGDQRLLDASHRDLRRARAAALNIVPTSTGAAKAVALVLPSLKGKLNGIALRVPTPNVSVVDLVVQVTKKTFAEEVNAAFREAADKELNGILSVCDEPLVSVDFRCSDVSSTVDSSLTMVMGDDMVKVIAWYDNEWGYSQRVVDLADIVANQWK	At3g26650	XP_004236849.1	20	395	6	38.811	0.250273	5	3	8	1.3.4	PS.calvin cycle	Cp	25	3	Cp	Cp	Cp	Cp	87	plastid stroma	plastid	plastid
	Solyc02g020940	GAPA-2	Glyceraldehyde-3-phosphate dehydrogenase (AHRD V1 **** D7UNZ5_BRARC); contains Interpro domain(s) IPR000173 Glyceraldehyde 3-phosphate dehydrogenase	MASAALSVANSSVHVSKNKGSFSEFTGLRTSSAVPFGVGWKTNVDLLSLVAYQTSVISGAGKNNNNNSRVVEAKLKVAINGFGRIGRNFLRCWHGRKDSPLDVIAINDSGGVKQASHLLKYDSTLGIFDADVKPVGTDGISVDGKIIKVVSDRNPINLPWKDLGVDLVIEGTGVFVDREGAGKHIQAGAKKVLITAPGKGDIPTYVVGVNADLYSPDESIISNASCTTNCLAPFVKVLDQKFGIIKGTMTTTHSYTGDQRLLDASHRDLRRARAAALNIVPTSTGAAKAVALVLPSLKGKLNGIALRVPTPNVSVVDLVVQVSKKTFAEEVNAAFRESADNELAGILSVCDEPLVSVDFRCSDVSSTVDASLTMVMGDDMVKVIAWYDNEWGYSQRVVD…	At1g12900	XP_004231523.1	21	371	7	49.119	0.316745	5	3	8	1.3.4	PS.calvin cycle	Cp	29	3	Cp	Cp	Cp	Cp	92.5	plastid stroma	plastid	plastid
	Solyc12g094640	GAPB-1	Glyceraldehyde-3-phosphate dehydrogenase B (AHRD V1 ***- B4F8L7_MAIZE); contains Interpro domain(s) IPR000173 Glyceraldehyde 3-phosphate dehydrogenase	MASHAALAPSRIPTSTRLLSKNSYSFPTQCFSKKFEVAEFSGLRSSGCVTFCNKESSFFDVVSAQLTPKTTGSAGPVKGETVAKLKVAINGFGRIGRNFLRCWHGRKDSPLDVVVVNDSGGVKNASHLLKYDSMLGTFKADVKIVDNETISVDGKNIKVVSSRDPLKLPWAELGIDIVIEGTGVFVDGPGAGKHIQAGAKKVIITAPAKGADIPTYVVGVNEQDYSHEVANIVSNASCTTNCLAPFAKILDEEFGIVKGTMTTTHSYTGDQRLLDASHRDLRRARAAALNIVPTSTGAAKAVSLVLPQLKGKLNGIALRVPTPNVSVVDLVINVEKKGISAEDVNAAFRKAADGPLNGILAVCDEPLVSVDFRCSDVSTTIDSSLTMVMGDDMVKIVAW…	At1g42970	XP_004253122.1	23	447	7	20.544	0.132478	5	3	8	1.3.4	PS.calvin cycle	Cp	63	3	Cp	Cp	Cp	Cp	98.8	plastid stroma	plastid	plastid
	Solyc04g082630	GAPB-2	Glyceraldehyde-3-phosphate dehydrogenase B (AHRD V1 **** B4F8L7_MAIZE); contains Interpro domain(s) IPR000173 Glyceraldehyde 3-phosphate dehydrogenase	MVGTNHILNHIYQKRSSFPQNADHLVAAMASHAALASSRIPTSTRLPSNKNSYSFPTQCLSKKFEVAEFSGLRSSGCVTFSNRESSFFDVVSAQLTPKTTGSAPAKGETVAKLKVAINGFGRIGRNFLRCWHGRKDSPLDVVVVNDSGGVKNASHLLKYDSMLGTFKADVKIVDNETISVDGKHIKVVSSRDPLKLPWAELGIDIVIEGTGVFVDGPGAGKHIQAGAKKVIITAPAKGADIPTYVVGVNEQDYSHEIANIISNASCTTNCLAPFVKVMDEELGIVKGTMTTTHSYTGDQRLLDASHRDLRRARAAALNIVPTSTGAAKAVSLVLPQLKGKLNGIALRVPTPNVSVVDLVVNVEKKGITAEDVNAAFRKAADGPLKGILDVCDAPLVSVD…	At1g42970	XP_004238446.3	22	379	6	18.783	0.121123	5	3	8	1.3.4	PS.calvin cycle	Cp	90	4	Cp	possibly Cp	Cp	Cp	92.6	plastid stroma	plastid	plastid
	Solyc01g079470	CP12	CP12 (AHRD V1 ***- O24136_TOBAC); contains Interpro domain(s) IPR003823 Protein of unknown function CP12	MATIAGVSLTSPKFLAKNSNSPNFKPFKLPCLNNPWKKSSTKFGLVCSAAPDNKLSDLVADSVKGAEETCNENPASGECAAAWDVVEEASAAASHARDKKKQEDVLENYCKENPETDECRTYDN	At3G62410	XP_004229393.1	1	10	1	0.389	0.00250847	5	3	8	35.2	not assigned.unknown	Cp	59	1	Cp	Cp	Cp	C	56.6	plastid stroma	plastid	plastid
	Solyc06g009630	CP12	CP12 (AHRD V1 ***- O24136_TOBAC); contains Interpro domain(s) IPR003823 Protein of unknown function CP12	MASIAGVSITIPTISSDSPKIQPLKLQTLNSPWKKSSQLGYRRMMYVVVPRVVPDKKLSDLVAESVKEAEETCAEDPVSGECKAAWDVVEETSAAASHARDKKKESDVLENYCKDNPETDECRTYDN	At3g62410	XP_010321871.1	2	43	2	1.154	0.00744159	5	3	8	1.3	PS.calvin cycle	Cp	62	2	Cp	Cp	Cp	C	41.1	plastid stroma	plastid	plastid
	Solyc07g066610	cpPGK1	Phosphoglycerate kinase (AHRD V1 ***- O81394_SOLTU); contains Interpro domain(s) IPR001576 Phosphoglycerate kinase	MASATASHTLCGIPTTSSSSTTNKSTTYSSARFLLKTPLRRLGFAGTVADPLFTNHVATKLRSVKASSNPVRAVVSMAKKSVGDLSSSDLKGKKVFVRADLNVPLDDSQNITDDTRIRAAIPTIKHLIANGAKVILSSHLGRPKGVTPKYSLAPLVPRLSELLGIQVVKADDCIGPEVDKLVDSLPEGGVLLLENVRFYKEEEKNEPEFAKKLASLADLYVNDAFGTAHRAHASTEGVTKFLKPSVAGFLLQKELDYLVGAVSTPKRPFAAIVGGSKVSSKIGVIESLLEKCDILLLGGGMIFTFYKAQGLSVGSSLVEEDKLELATSLLEKAKAKGVSLLLPSDVVIADKFAPDANSKIVPASAIPDGWMGLDIGPDSIKTFNDALDTTKTVIWNGPM…	At1g56190	XP_004243968.1	33	731	33	53.117	0.342526	5	3	8	1.3.3	PS.calvin cycle	Cp	75	1	Cp	Cp	Cp	Cp	99.9	plastid stroma	plastid	plastid
	Solyc08g076220	PRK	Phosphoribulokinase/uridine kinase (AHRD V1 ***- B7KI62_CYAP7); contains Interpro domain(s) IPR006083 Phosphoribulokinase/uridine kinase	MAVCTVYTAQSLNSSCSISTPSKPHLRFHQKQVIFLTKRPRKMTCSASSDGEKTVVignaLAADSGCGKSTFMrRNALTSVFGGAAEPPKGGNPDSNTLISDMTTVICLDDYHSLDRTGRKEKGVTALDPRANDFDLMYEQVKAIKDGVPVDKPIYNHVSGLLDPPEVIKPPKILVIEGLHPMYDERVRDLLDFSIYLDISNEVKFAWKIQRDMAERGHSLESIKASIEARKPDFDAYIDPQKQYADAVIEVLPTQLIPDDNEGKVLRVRLIMKEGVKNFNPVYLFDEGSTISWIPCGRKLTCSYPGIKFTYGPDTYFGNEVSVLEMDGQFDRLDELIYVESHLSNLSSKFYGEVTQQMLKHADFPGSNNGTGFFQTIVGLKIRDLYEQIVASRAGAPV…	At1g32060	XP_004245935.1	15	267	15	41.17	0.265486	5	3	8	1.3.12	PS.calvin cycle	Cp	46	2	Cp	Cp	Cp	Cp	70.1	plastid stroma	plastid	plastid
	Solyc02g069620	RPI4	Ribose 5-phosphate isomerase-like (AHRD V1 ***- Q2LC22_9ASTR); contains Interpro domain(s) IPR004788 Ribose 5-phosphate isomerase	MSNMAMAMALPSSTSPFLFSCTTQKQAHNFTSSRKPLHRFVTRSTLSDDLFLAAKHTVDSYVKNGMVVGLGSGHASTLAIQYLGQKLRAGTIKDVTAIPTCVSSASEAAKAGIPLEQYDDSLKIDLAFDEADIMEEETLAAIIGrRNAKLQGDDSIIKEKTILEAADQLIFIIKEKQFKGGVEGSVPVLIKSVNWLETAEEIDDLFLGDAEVWrRNAPAIGYAGPLGGDFPLVTKEGHNILDVIFTSPIESLVEVAKILDQIDGVVEHGVIFRKPCTAIIASENDLQIVDNTFLMESSNF	At5g44520	XP_004233185.1	5	32	5	5.31	0.0342416	5	3	8	1.3.10	PS.calvin cycle	Cp	58	3	Cp	Cp	Cp	Cp	98.6	plastid stroma	plastid	-
	Solyc01g097460	RPI3	Ribose-5-phosphate isomerase (AHRD V1 ***- A8IRQ1_CHLRE); contains Interpro domain(s) IPR004788 Ribose 5-phosphate isomerase	MASLSLISPHSPSSSSSSTLRHSSIIGTRLPSIFLRNPTIRIRSTTPSIKAFSAPVPSPLTQDELKKLAADKAVEYVKSGMVLGLGTGSTAAFVVAKLGELLSSGQLTNIVGVPTSKRTEEQALSLNIPLSTLDNADHPHIDLAIDGADEVDPNLDLVKGRGGALLREKMVEAASDKFVVVVDDSKLVSGLGGSGLAMPVEVVQFCWKYNLVRLQELFKEEGVDAKLRLDGNGKPYVTDNSNYIVDLYFKTPIRDSAAAGKEIASFEGVVEHGLFLDMTTAVIIAGKEGVSVKSK	At3g04790	XP_004230104.1	11	246	11	33.551	0.216354	5	3	8	1.3.10	PS.calvin cycle	Cp	50	3	Cp	Cp	Cp	Cp	93.4	thylakoid-peripheral-stromal-side plastid stroma	plastid	plastid
	Solyc03g034220	RBCS-2A	Ribulose bisphosphate carboxylase small chain (AHRD V1 ***- A9YTZ7_SOLTU); contains Interpro domain(s) IPR000894 Ribulose bisphosphate carboxylase, small chain	MASSVISSAAVATRSNVTQASMVAPFTGLKSSATFPVTKKQNLDITSIASNGGRVSCMQVWPPINMKKYETLSYLPDLSDEQLLSEIEYLLKNGWVPCLEFEtheGFVYRENNKSPGYYDGRYWTMWKLPMFGCTDATQVLAEVQEAKKAYPQAWVRIIGFDNVRQVQCISFIAYKPEGY	At5g38410	NP_001295873.1	8	216	1	11.589	0.0747319	4	3	7	1.3.2	PS.calvin cycle	Cp	56	2	Cp	Cp	Cp	Cp	100	plastid stroma	plastid	plastid
	Solyc02g085950	RBCS-3B	Ribulose bisphosphate carboxylase small chain (AHRD V1 ***- A9YTZ7_SOLTU); contains Interpro domain(s) IPR000894 Ribulose bisphosphate carboxylase, small chain	MASSIVSSAAVATRGNGAQASMVAPFTGLKSTASFPVSRKQNLDITSIASNGGRVSCMQVWPPINMKKYETLSYLPDLSDEQLLSEIEYLLKNGWVPCLEFEtheGFVYRENHKSPGYYDGRYWTMWKLPMFGCTDATQVLAEVQEAKKAYPQAWVRIIGFDNVRQVQCISFIAYKPEGY	At5g38410	NP_001296139.1	8	231	1	14.849	0.0957541	5	3	8	1.3.2	PS.calvin cycle	Cp	56	2	Cp	Cp	Cp	Cp	100	plastid stroma	plastid	plastid
	Solyc02g063150	RBCS-1	Ribulose bisphosphate carboxylase small chain (AHRD V1 ***- Q84QE5_TOBAC); contains Interpro domain(s) IPR000894 Ribulose bisphosphate carboxylase, small chain	MASSIVSSAAAATRSNVAQASMVAPFTGLKSAASFPVTKKNNNVDITSLASNGGRVRCMQVWPPINMKKYETLSYLPDLSDEQLLSEIEYLLKNGWVPCLEFETERGFVYRENNSSPGYYDGRYWTMWKLPMFGCTDATQVLAEVQEAKKAYPQAWVRIIGFDNVRQVQCISFIAYKPEGF	At5g38420	NP_001295872.1	7	200	2	9	0.0580367	5	3	8	1.3.2	PS.calvin cycle	Cp	57	2	Cp	Cp	Cp	Cp	100	plastid stroma	plastid	plastid
	544163621	RBCL	Ribulose-1,5-bisphosphate carboxylase large chain (chloroplast) [Solanum lycopersicum]	MSPQTETKASVGFKAGVKEYKLTYYTPEYQTKDTDILAAFRVTPQPGVPPEEAGAAVAAESSTGTWTTVWTDGLTSLDRYKGRCYRIERVVGEKDQYIAYVAYPLDLFEEGSVTNMFTSIVGNVFGFKALRALRLEDLRIPPAYVKTFQGPPHGIQVERDKLNKYGRPLLGCTIKPKLGLSAKNYGRAVYECLRGGLDFTKDDENVNSQPFMRWRDRFLFCAEALFKAQTETGEIKGHYLNATAGTCEEMIKRAVFARELGVPIVMHDYLTGGFTANTTLAHYCRDNGLLLHIHRAMHAVIDRQKNHGIHFRVLAKALRMSGGNADHIHSGTVVGKLEGERDITLGFVDLLRDDFVEQDRSRGIYFTQDWVSLPGVLPVASGGIHVWHMPALTEIFGDD…	Atcg00490	YP_008563096.1	31	1339	27	1614.6	10.4118	5	3	8	1.3.1	PS.calvin cycle	-	-	-	-	-	-	-	-	plastid stroma	plastid	-
	Solyc03g115820	RPE	Ribulose-5-phosphate-3-epimerase (AHRD V1 ***- Q8S4X2_PEA); contains Interpro domain(s) IPR000056 Ribulose-phosphate 3-epimerase	MATASSLGSSTLLQSQISGFGGSQKISFSNPNSLTFTrRNARIQTVVTASSRVDKFSKSDIIVSPSILSANFSKLGEQVKAVEQAGCDWIHVDVMDGRFVPNITIGPLVVDSLRPITDLPLDVHLMIVEPDQRVPDFIKAGADIVSVHCEQSSTIHLHRTINQIKSLGAKAGVVLNPGTPLTAIEYVLDAVDLVLIMSVNPGFGGQSFIESQVKKISDLRKICAEKGVNPWIEVDGGVGPKNAYKVIEAGANALVAGSAVFGAPDYAEAIKGIKTSKRPAAVAV	At5g61410	NP_001333814.1	2	76	2	2.162	0.0139417	5	3	8	1.3.11	PS.calvin cycle	Cp	46	1	Cp	Cp	Cp	Cp	100	plastid stroma	plastid	-
	Solyc05g052600	SBPase	Sedoheptulose-1,7-bisphosphatase	METGVTCCARVTSLLPNVSSQQYSTSIATSRSISPSFNSRSLKSSSLFGESLRVAPKSSLKVSRTKNSSLVTKCEIGDSLEEFLSKSTSDKGLIRLMMCMGEALRTIAFKVRTASCGGTACVNSFGDEQLAVDMLADKLLFEALTYSHFCKYACSEEVPELQDMGGPAEGGFSVAFDPLDGSSIVDTNFTVGTIFGVWPGDKLTGITGREQVAAAMGIFGPRTTYVLALKDVPGTHEFLLLDEGKWQHVKDTTEIGEGKMFSPGNLRATFDNPDYAKLIEYYVKEKYTLRYTGGMVPDVNQIIVKEKGIFTNVTSPTAKAKLRLLFEVAPLGFLIEKAGGYSSDGKQSVLDKVIVNLDDRTQVAYGSKNEIIRFEETLYGSSRLKAGAPVGAAV	At3g55800	NP_001234585.1	20	317	20	20.544	0.132478	5	3	8	1.3.9	PS.calvin cycle	Cp	53	1	Cp	Cp	Cp	Cp	97.6	plastid stroma	plastid	plastid
	Solyc10g018300	TKL1	Transketolase 1 (AHRD V1 **** O78327_CAPAN); contains Interpro domain(s) IPR005478 Bacterial transketolase	MASSSSLTLSQAIFSPSLPRHGSSSSSSPSISFSTFSGLKSTPFTSSHRRILPSTTVTKQHFSVRASSAVETLEKTDAAIVEKSVNTIRFLAIDAVEKANSGHPGLPMGCAPMGHILYDEVMKYNPKNPYWFNRDRFVLSAGHGCMLQYALLHLAGYDSVQEDDLKSFRQWGSKIPGHPENFETPGVEVTTGPLGQGIANAVGLAVAEKHLAARFNKPDAEIVNADHYTYVILGDGCQMEGISNEACSLAGHWGLGKLIAFYDDNHISIDGDTEIAFTEDVSARFEALGWHVIWVKNGNTGYDEIRAAIKEAKSVKDKPTMIKVTTTIGFGSPNKANSYSVHGSALGAKEVEATRNNLGWPYEPFHVPEDVKSHWSRHTPEGAALETEWNAKFAEYEKK…	At3g60750	XP_004248560.1	32	728	22	45.416	0.292866	5	3	8	1.3.8	PS.calvin cycle	Cp	65	1	Cp	Cp	Cp	Cp	100	plastid stroma	plastid	plastid
	Solyc05g050970	TKL2	Transketolase 1 (AHRD V1 **** O78327_CAPAN); contains Interpro domain(s) IPR005478 Bacterial transketolase	MASSSSLTLSQAILSRSVSRHGSSSSPNSQLSPSSISLPTFSGLKSTTATSFRRRILPSAAGAGRHSAIRASAAVETLQKTDNSLVEKSVNTIRFLAIDAVEKANSGHPGLPMGCAPMGHILYDEIMRYNPKNPYWFNRDRFVLSAGHGCMLQYALLHLAGYDAVREEDLKSFRQWGSKTPGHPENFETPGVEVTTGPLGQGIANAVGLALSEKHLAARFNKPDAEIVNADHYTYCILGDGCQMEGISQEAASLAGHWGLGKLIAFYDDNHISIDGDTEIAFTEDVAARYEALGWHVIWVKNGNTGYDEIRAAIKEAKAVTDKPTLIKVTTTIGFGSPNKSNSYSVHGSALGAKEVEATRQNLGWPYEPFHVPEEVKSHWSRHVPEGAALEAGWNTKFA…	At2g45290	XP_004240048.1	25	237	15	8.345	0.0538129	5	3	8	1.3.8	PS.calvin cycle	Cp	70	1	Cp	Cp	Cp	Cp	100	plastid stroma	plastid	plastid
	Solyc10g054870	pdTPI-2B	Triosephosphate isomerase (AHRD V1 ***- A9PH17_POPTR); contains Interpro domain(s) IPR000652 Triosephosphate isomerase	MATSLASQLSGPKSAIAFSTPPHFSGLRPSSNFKLDNTRSFFQNVDSHKGCRPVVSMAGSGKFFVGGNWKCNGTKDSISKLVSDLNSAKLESDVDVVVAPPFMYIDQVKSSLTDRIEISGQNCWTGKGGAFTGEISVEQLKDIGCKWVILGHSErRNAHVignaENDEFIGKKAAYALSQNVGVIACIGELLEEREAGKTFDVCFNQLKAFADALPSWDDVVIAYEPVWAIGTGKVASPEQAQEVHAAVRDWLSKNVSAEVASKTRIIYGGSVNGGNSSDLAKKEDIDGFLVGGASLKGPEFATIINSVTSKKVAA	At2g21170	XP_004248665.1	12	219	5	16.783	0.108225	5	3	8	1.3.5	PS.calvin cycle	Cp	55	2	Cp	Cp	Cp	Cp	100	plastid stroma	plastid	plastid
	Solyc01g111120	pdTPI-2A	Triosephosphate isomerase (AHRD V1 **** D6N3G7_GOSHI); contains Interpro domain(s) IPR000652 Triosephosphate isomerase	MAVASTSLASQMSGPKSVTSISCPQFSGLRKSLSKLDNSVSFSTSQAFFQNVDSHLRISSDRKGCRAVVAMAGSGKFFVGGNWKCNGTKDSISKLVSDLNSAQLESDVDVVVAPPFLYIDQVKNSLTDRIEVSAQNCWTGKGGAFTGEISVEQVKDLGCKWVILGHSERRHVignaENDEFIGKKAAYALSQGVGVIACIGELLEEREAGKTFDVCFQQLKAFADAIPSWDNVVIAYEPVWAIGTGKVASPEQAQEVHVAVRDWLTKNVSAEVASKTRIIYGGSVNGSNSSDLAKKEDIDGFLVGGASLKGPEFATIVNSVTAKKVAA	At2g21170	XP_004230885.1	11	262	4	20.544	0.132478	5	3	8	1.3.5	PS.calvin cycle	Cp	69	1	Cp	Cp	Cp	Cp	99.9	plastid stroma	plastid	plastid
RuBisCo assembly & activation	Solyc12g009440	BSD2	Bundle-sheath defective protein 2 family (AHRD V1 ***- D7LRE2_ARALY); contains Interpro domain(s) IPR001305 Heat shock protein dnaj, cysteine-rich region	MANSLCFTPIASLNSFNKPGLINRNGNCAGRKIQLIKDVTFNSKSNLRVVEVKAADSDKETKVKSIVCQKCDGNGAVACSQCKGAGVNSVNADHFNGRFKAGGLCWLCRGKKDILCGDCNGAGFLGGFMSTFDE	At3g47650	XP_004251716.1	1	3	1	0.931	0.00600357	2	0	2	33.99	development.unspecified	Cp	48	2	Cp	Cp	Cp	C	52.9	plastid stroma	plastid	-
	Solyc06g075010	CPN60A1	Chaperonin - RuBisCo LS binding protein (AHRD V1 ***- B2IXD2_NOSP7); contains Interpro domain(s) IPR001844 Chaperonin Cpn60	MASANGMSTASILSSSSKQVGLKGrRNAVNQLQGQKFNNKASKSRLVVRANAKDIAFDQKSRAALQAGIDKLVNVVGVTLGPRGRNVVLDEYDTPKVVNDGVTIARAIELADAMENAGATLIREVASLTNDAAGDGTTTASVLAREIIKHGLLSVTSGANPVSLKRGIDKTVNALVAMLErRNAARPVKGRDDIKAIASISAGNDDEIGTMIADAIDKVGPDGVLSIESSSSFETTVRVEEGMEIDKGYISPQFITNQEKLVVEFENARVLVTNADHDISAIKDIMPLLEKATQLRAPLLIIAGEVTGEALATLIVNKLRGILNVAAIRAPGFGQrRNAKALLQDIAIVTGAEYQAADLCMPVESTPVEALGFARKVTITKDSTTILADDVSKDEIQAR…	At2g28000	XP_004241283.1	11	52	8	2.3	0.0148316	5	2	7	1.3.13	PS.calvin cycle	Cp	47	1	Cp	Cp	Cp	Cp	96.3	plastid stroma	plastid	plastid
	Solyc11g069790	CPN60A2	Chaperonin - RuBisCo LS binding protein (AHRD V1 ***- B2IXD2_NOSP7); contains Interpro domain(s) IPR001844 Chaperonin Cpn60	MASANAISTASIIPSPSKQGGLKNRKVSQLQGQRFGNKGAKNRFVVKACAKEIAFDQKSRSALQAGIDKLADAVGLTLGPRGRNVVLDEYGTPKVVNDGVTIARAIELPDAMENAGAALIREVASKTNDSAGDGTTTASVLAREIIKLGLLSVTSGANPVSLKRGIDKTVLGLIEELEKKARPVKGRDDIKAIASISAGNDESIGTMIADAIDKVGPDGVLSIESSSSLETTVHVEEGMEIDRGYISPQFVTNPEKLISEFENARVLVTDQKISAIKDIIPLLEKTTQLRAPLLIIAEDITGEALATLVVNKLRGILNVAAIKAPGFGErRNAKALLQDIAIVTGAEYQATDLGLLVENTPVEALGIARKVTITKDSTTIIADAASKDEIQSRIAQLKK…	At2g28000	XP_004251160.1	28	276	24	35.308	0.227684	5	3	8	1.3.13	PS.calvin cycle	Cp	60	2	Cp	Cp	Cp	Cp	96.3	plastid stroma	plastid	plastid
	Solyc03g120850	CPN60B	Chaperonin - RuBisCo LS binding protein beta subunit (AHRD V1 ***- B2IXD2_NOSP7); contains Interpro domain(s) IPR001844 Chaperonin Cpn60	MAATFTSVCSISSTSQTVEKKIINSCETLSSFSGISLTSLGGrRNAKNNVLKKRNDSKIQAMAKELHFNQDGSAIKKLQAGVNKLADLVGVTLGPKGRNVVLESKYGSPKIVNDGVTVAREVELEDPVENIGASLVRQAASKTNDLAGDGTTTSVVLAQGLITEGVKVVAAGANPIQIARGIDRTTKALVSELKKLSKEVEDSELADVAAVSAGNNYEVGNMIAEALSKVGRKGVVTLEEGRGSENNLFVVEGMQFDRGYISPYFVTDNEKMVAEYENCKLLLVDKKITNARDLVNVLEEAIKNGYPILVIAEDIEQEALATLVVNKLRGALKIAALKAPGFGDRKSQYLDDIAILTGGTVIREEVGLYLDQAGSEVLGNAAKVVLSKDSTTIVGDGST…	At1g55490	XP_004235655.1	28	153	21	18.307	0.118053	5	3	8	1.3.13	PS.calvin cycle	Cp	58	2	Cp	Cp	Cp	Cp	99	plastid stroma	plastid	plastid
	Solyc01g028810	CPN60B	Caperonin- RuBisCo large subunit-binding protein subunit beta, chaperonin (AHRD V1 ***- B4VMY1_9CYAN); contains Interpro domain(s) IPR001844 Chaperonin Cpn60	MASTFAGMSSAGPLAAPSTSSNKLSSVANISSTSFGSKRNVALKKSrRNAPTILAAAKELHFNKDGSAIKKLQNGVNKLADLVGVTLGPKGRNVVLESKYGAPKIVNDGVTVAREVELEDPVENIGAKLVRQAAAKTNDLAGDGTTTSVVLAQGLIAEGVKVVAAGANPVLITRGIEKTAKALVAELKNMSKEVEDSELADVAAVSAGNNLEVGSMIAEAMSKVGRKGVVTLEEGKSAENSLRVVEGMQFDRGYVSPYFVTDSEKMSVEYENCKLLLVDKKITNARDLVNVLEDAIRNGYPILIIAEDIEQEALATLVVNKLRGALKVAALKAPGFGERKSQYLDDIATLTGGTVIREELGLTLDKADKEVLGHAAKVVLTKDATTIVGDGSTQEAVNK…	At3g13470	XP_004228946.1	34	255	27	19.62	0.12652	5	3	8	1.3.13	PS.calvin cycle	Cp	52	1	Cp	Cp	Cp	Cp	99.9	plastid stroma	plastid	plastid
	Solyc11g006060	RAF1	RuBisCo accumulation factor	MFSLTVNSPKSLSLSTPFLPSHPHPIPTITHKPNLSPRPISALIIPPSGQRNQQYSTAPPQQQQLYQPFRPPPSPLPPKFRNLDTNSKLEVLANRLGLWYEYAPLIPSLTSEGFTPSTLEEITGITGVEQNRLVVAAQVRETLVECGLDEETLSFFESGGAELLYEIRLLSGKQRTDAASFIVRNGFDMKQAQDLARSMKDFPRRRIDYGWDKFTGDSPGDCLAFWFFRLAQEHAAAAAEDSRVEAMEKALEVVETESARNVLVEVLEGKGVDKESVIDEQVKVPLVRMKLGEVAESTKVVVLPVCKAEKREFEVEAAPWECGGVGEFGVVEAEKDWRRWVVLPGWQPIAGLERGGVAVSFKNGKLLPWKEKRKYKEEPVLVVADRGRKEVVVDDGFYL…	At3g04550	XP_004249913.1	12	72	12	6.079	0.0392005	5	3	8	35.2	not assigned.unknown	Cp	92	3	Cp	-	Cp	Cp	99.3	plastid stroma	plastid	-
	Solyc11g065740	RBCX2	RbcX protein (AHRD V1 *-*- Q5W3L8_9NOST); contains Interpro domain(s) IPR003435 Chaperonin-like RbcX	MVGAFSVVGSPMVDSHSSPCLCLDALPTCNLGIGDSLVRKQKQLPRLGTMELSTSFVDLRFSAKCVKGNYKNLKKQTKGRKNLRIVNDLGGQYEESFSDIKTQILNYFTYKAVRTVLNQLNEMNPPQYHWFNDYVTANKPSDGKRFIRNLAKEKQELAEKVMATRLSLYAKWIKKCNADHEEIYNRISDQNVEVMRERLMETVIWPSDDTNTGMK	At5g19855	XP_004250941.1	1	2	1	0.334	0.00215381	2	3	5	35.2	not assigned.unknown	-	-	4	-	Cp	-	C	86.4	plastid stroma	plastid	-
	Solyc05g013150	LSMT1	Set domain protein (AHRD V1 ***- C1EFC8_9CHLO); contains Interpro domain(s) IPR011192 Rubisco methyltransferase	MASVFSSSFFCPLKTTKLRIKLQTLQSSQKPFLISSLQLRELDPKIPQPVQTFWKWLCDEGVVSIKTPVKPGIVAEGLGLVAKRDISKGETVLGVPKRFWINTDAVAESEIGNVCTGLEPWISLALFLLREKWKDDSKWKYYMAVLPESTDSTIYWSEEELSEIQGTQLLSTTLSVKEYVQDEFQKVEEQVILGNKQLFPFPITLDDFFWAFGMLRSRAFSRGGIQNLMLVPFADLANHSVKVTTENADHIHEVGGPAGLFSWDLLFSFQSPLRLKAGDQFLIQYGLKKSNADMAIGYGFIEPNSARDAFTLTLEISKTDDFYGDKLDIAESNGLGETAEFDIKLGQSLPPPLFPYLRLVSLGGTDNFLLESITGNAVWNLLELPVSRANEELICKVVR…	At1g14030	XP_004239106.1	1	4	1	0.129	0.000831859	3	0	3	1.3.13	PS.calvin cycle	Cp	21	5	Cp	Cp	Cp	Cp	94.9	plastid stroma	plastid	plastid
	Solyc05g013160	LSMT2	Set domain protein (AHRD V1 ***- C1EFC8_9CHLO); contains Interpro domain(s) IPR011192 Rubisco methyltransferase	MASVFSLPSSSFLCPLKTTRFRTKIQSLHSSPKSLLINSLQLQELDPNIPEPVQTFWKWLCEEGVVSAKTPVKPGIVPEGLGLVAKRDIAKGETVLEVPrRNAFWINPDAVADTEIGNVCTGLKPWISVALFLLREKWRDDSKWKYYMAVLPESTDSTIYWSEEELSEIQGTQLLSTTLSVKDYVQNEFRKVEEEVILPNKQLFPFPITLDDFFWAFGMLRSRAFSRLRNQNLILVPFADLTNHNARVTTENADHAHEVRGPAGLFSWDLLFSLRSPLKLKAGDQLFIQYDLNKSNADMALDYGFIEPSTSARDAFTLTLEISESDDFYEDKLDIAESNGLGGTAYFDIKLGQSLPPFLIPYLRLVALSGTDAFLLESIFRNAVWGHLELPVSRANEEL…	At1g14030	XP_004239106.1	14	71	14	6.197	0.0399615	5	3	8	1.3.13	PS.calvin cycle	Cp	26	2	Cp	Cp	Cp	Cp	99.4	plastid stroma	plastid	plastid
	Solyc09g011080	RCA2B	Ribulose-1 5-bisphosphate carboxylase/oxygenase activase 1 (AHRD V1 **** Q9AXG1_GOSHI); contains Interpro domain(s) IPR003959 ATPase, AAA-type, core	MATSISTIGAVNKLSLNNSVVGTSVPPTAFFGKTLKKVNNKVSSTNISNKNLRLVAQEKEIDEKKQTDGDRWKGLVNDVSDDQQDIARGKGLVDSLFQAPTGTGTHHAIMNSYEYLSQGLRQYNLDNKLDGFYIAPAFMDKLVVHITKNFLTLPNIKVPLILGVWGGKGQGKSFQCELVFRKMGINPIMMSAGELESGNAGEPAKLIRQRYREAAEIIRKGNMCCLFINDLDAGAGRMGGTTQYTVNNQMVNATLMNIADNPTNVQLPGMYNKQENARVPIIVTGNDFSTLYAPLIRDGRMEKFYWAPTREDRIGVCKGIFRTDRVPDDDIVKIVDSFPGQSIDFFGALRARVYDDEVRKWIGSTGIEQIGEKLLNSRDGPPTFEQPKMTIDKLLEYGN…	At2g39730	XP_004246415.1	27	430	8	110.034	0.709556	5	3	8	1.3.13	PS.calvin cycle	Cp	43	2	Cp	Cp	Cp	Cp	100	plastid stroma	plastid	plastid
	Solyc10g086580	RCA2A	Ribulose-1 5-bisphosphate carboxylase/oxygenase activase 1 (AHRD V1 ***- Q9AXG1_GOSHI); contains Interpro domain(s) IPR003959 ATPase, AAA-type, core	MAASVSTIGAASKAPLSLNNSVAGTSVPSTAFFGKSLKKVYAKGVSGPKVSNRNLRIVAQEVDETKEDRWKGLYDNTSDDQQDIARGKGLVDSLFQAPTGTGTHHAIMNSYEYVSQALKTYQLDNKLDGFYIAPAFMDKLVVHITKNFLTLPNIKVPLILGVWGGKGQGKSFQCELVFRKMGINPIMMSAGELESGNAGEPAKLIRQRYREAAEIIRKGNMCCLFINDLDAGAGRMGGTTQYTVNNQMVNATLMNIADNPTNVQLPGMYNKQENARVPIIVTGNDFSTLYAPLIRDGRMEKFYWAPTREDRIGVCKGIFRTDNVPEEAVVKIVDSFPGQSIDFFGALRARVYDDEVRKWVSGTGIELIGEKLLNSRDGPPTFEQPKMTLEKLLEYGNML…	At2g39730	XP_010312360.2	28	677	9	181.335	1.16934	5	3	8	1.3.13	PS.calvin cycle	Cp	58	2	Cp	Cp	Cp	Cp	100	plastid stroma	plastid	plastid
	Solyc03g117850	RCA3	Ribulose bisphosphate carboxylase/oxygenase activase (AHRD V1 **** B6T416_MAIZE); contains Interpro domain(s) IPR003959 ATPase, AAA-type, core	MALLFNNTNLLRAPLTLHSIPLSSTKQFPNYSSISVRCSSTNQQSDEVRDSDQDEPKKKKRLSEQSSWETKDSDGKDYLYRLGAEADNMNIAVGARAGVIDSLFAGNFLGKDSDIVFDYRQKVTRSFQYLQGDYYIAPVFLDKVVCHIVKNYISNILNAKVPLILGVWGGKGQGKTFQTELIFQAMGIEPVIMSAGELESERAGEPGKLIRERYRTASQVVQNQVRSFTAFITGHGKMSVLMINDIDAGLGRFGNTQVTVNNQIVVGTLMNLCDNPTRVSVGQDWREGDITHRIPIIVTGNDFSTMYAPLIRDGRMEKFYWQPTQEDIVNIVCRMYEKDGITKDEVATIVNTFPNQALDFYGAMRSRTYDQSILKWVEDSGGAEDIGRRFLRQRKKGEL…	At1g73110	XP_004235873.1	13	89	11	4.78	0.0308239	5	3	8	1.3.13	PS.calvin cycle	M	38	5	Cp	possibly M	Cp	Cp	99.8	stroma	plastid	plastid
	Solyc03g094175	-	Pterin-4-alpha-carbinolamine dehydratase (AHRD V1 *-** B6T9C1_MAIZE); contains Interpro domain(s) IPR001533 Transcriptiol coactivator/pterin dehydratase	MAAATHLSFSPPISVSSLPLRKPNFVTPNLQTSQSRICTRIRCNTNLLGDFGARDPFPAEVESKFGEKVLGNPDtheKILIPAASALSLANQECTDISPNQTPLSEFEAKQLLFKVVGWRIANEDGVLKLQCTWKLKDFDCGVELINRIGKVVEGTGHLPTLHQLQQSNQVHAELWTPSIGGLSMNDFIIAAKIDQVKTSDLVPRKRVWA	At5g51110	XP_004253324.1	3	8	3	2.162	0.0139417	3	3	6	35.2	not assigned.unknown	Cp	58	1	Cp	Cp	Cp	Cp	99.94	plastid stroma	plastid	-
A Proteins were identified by acetone preparations and/or the gel method. For emPAI and Mol% calculations, only the data from the acetone prepartions were used. Proteins identified solely by the gel method have data for the number of peptides, PSMs and unique peptides.
B Names of tomato proteins were based on the literature, NCBI annotation (identified in BlastP searches), and/or SolyGenomics descriptor. In a small number of cases, tomato protein names were assigned based on NCBI annotations and the Arabidopsis homolog.
C Some Sol Genomics descriptors were updated when NCBI annotations and Arabidopsis gene annotations were aligned.
D Target P's subcellular locations are: chloroplast (Cp), mitochondria (M), secretory (S), and no predicted location is indicated by a dash (-).
E ChloroP was used to predict the presence of a chloroplast transit peptide (Y) and the lack of a predicted transit peptide is indicated with a dash (-).
F Predotar's predicted subcellular locations were: chloroplast/plastid (Cp),endoplasmic reticulum (ER) or mitochondrion (M). For proteins with localization predictions that were less clear, Predotar provided categorized of possibly Cp, M and ER. Proteins with unresolved locations or that did not have a homolog detected by Predotar are indicated with a dash (-).
G WoLF PSORT's and YLoc's predicted subcellular locations were: chloroplast/plastid (Cp), cytosol (C), cytoskeleton (Cy), endoplasmic reticulum (ER), extracellular (EX), golgi apparatus (G), mitochondrion (M), nucleus (N), peroxisomes (P), plasma membrance (PM), and vacuole (V). Proteins with no chloroplast location in WoLF PSORT are indicated by not Cp.The number of proteins predicted to be in t…
											16.2313

## Sheet: Table S7C.OPP
Table S7C. Oxidative pentose phosphate pathway.
Gene and protein descriptors						ProteomicsA					Times detected			Bin codes		Algorithms								Databases
Tomato Gene ID	Gene nameB	DescriptionC	Protein Sequence	Arabidopis homolog	Tomato proteinB NCBI accession	Peptides	PSMs	Unique Peptides	emPAI	Mol%	Acetone samples	Gel samples	Total	Bincode	Name	TargetP D ver.1	Transit peptide length	TargetP (reliability class)	ChloroP E	Predotar F	WoLF PSORT G	YLoc G	YLoc % Confidence	PPDB	SUBA4	plprot
Solyc12g056120	PGD3	6-phosphogluconate dehydrogenase decarboxylating IPR006113 6-phosphogluconate dehydrogenase, decarboxylating	MEGAATAQALSRIGLAGLAVMGQNLALNIAEKGFPISVYNRTTSKVDETLDRAQNEGQLPLIGQYNPRDFVLSIQRPRSVIILVKAGSPVDQTIAALSEYMEPGDTIIDGGNEWYENTERRIDEASSKGLLYLGMGVSGGEEGARNGPSLMPGGSYGAYTNIKDILEKVAAQVEDGPCVTYIGEGGSGNFVKMVHNGIEYGDMQLISEAYDVLKGGLSNSELADIFAEWNRGELESFLIEITADIFNVKDELTGNGELVDKILDKTGMKGTGKWTVQQAAELSIAAPTIAASLDSRYMSGLKDERVEASEIFRKEGLKEEISSDINGISSVDKKRLIDDVRQALYASKICSYAQGMNLLRAKSSEKGWNLNLGEMARIWKGGCIIRAVFLDRIKKAYQR…	At5g41670	XP_004252580.1	19	122	17	9.926	0.064008	5	3	8	7.1.3	OPP.oxidative PP.6-phosphogluconate dehydrogenase	S	-	3	-	-	not Cp	C	45.74	stroma	plastid	-
Solyc04g005160	PGD2	6-phosphogluconate dehydrogenase decarboxylating IPR006113 6-phosphogluconate dehydrogenase, decarboxylating	MGQNLALNIAEKGFPISVYNRSTSKVDETVERAKKEGNLPLYGFHDPESFVLSIQKPRVIIILVKAGLPVDQTIKTLSAFMEKGDCIIDGGNEWYENTERREKEMAELGLLYLGMGVSGGEEGARNGPSMMPGGSFEAYKYIEDILLKVAAQVPDSGPCVTYIGEGGSGNFVKMVHNGIEYGDMQLIAEAYDVLRSVGKLSNDELHQVFSEWNKGELLSFLIEITADIFGVKDDKADGYLVDKVLDKTGMKGTGKWTVQQAAELSVAAPTIAASLDSRFLSGLKDERVEAAKVFESSGVSDIFVEQSVDKNQLIDDVRKALYASKICSYAQGMNLIRAKSVEKGWDLKLGELARIWKGGCIIRAIFLDRIKGAYDRNPDLANLLVDEEFAKEMVERQSA…	At3g02360	XP_004237068.1	3	13	0	0.616	0.00397229	1	0	1	7.1.3	OPP.oxidative PP.6-phosphoglucote dehydrogese	-	-	3	-	-	Cp	C	99.35	-	peroxisome	-
Solyc05g055280	FER3	Ferredoxin-6 IPR010241 Ferredoxin (2Fe-2S), plant	MATYKVKLVDRDGKESEIEVADDEYILDKAEEAGVELPYSCRAGSCCTCAGQLVSGTVDQSEGAFLDDEQMEKGYLLTCISYPKSDCVIHTHKEEDVV	At2g27510	XP_004231567.1	1	2	1	0.778	0.00501695	2	0	2	7.3	OPP.electron transfer	-	-	2	-	-	Cp	C	58.87	-	plastid	-
Solyc02g024050	FNRR2	Ferredoxin-NADP reductase (AHRD V1 ***- B9SB31_RICCO); contains Interpro domain(s) IPR012146 Ferredoxin--NADP reductase	MAHSAISQVSVAVPLQTDSSFRRSTFKATSLTFSDKSCISMPSIDLKATRSRSQYIVCMSVQHASKAKVSVSPLSLENATEPPLNIYKPKEPYTATIVSVERIVGPKAPGETCHIVINADHDGNLPYWEGQSYGVVPPGENPKKPGSPHNVRLYSIASTRYGDSFDGKTASLCVRRAVYYDPETGKEDPSKNGVCSNFLCNAKPGDKVKITGPSGKIMLLPENNPNATHIMIGTGTGVAPFRGYLRRMFMESVPMKFNGLAWLFLGVANTDSLLYDDEFTKYLNDYPGNFRYDRALSREQKNNKGGKMYVQDKIEEYSDEIFKLLDEGAHIYFCGLKGMMPGIQDTLKRVAEERGESWEQKLSQLKKNKQWHVEVY	At1g30510	XP_004239725.1	9	31	9	3.281	0.0211576	5	3	8	7.3	OPP.electron transfer	Cp	57	1	Cp	Cp	Cp	Cp	100	plastid	plastid	-
Solyc07g066270	PGL4	Glucosamine-6-phosphate deamise IPR005900 6-phosphogluconolactose	MAETVSGESKAEVKVYDSDEELAVALAKYTADLSEKFCKERDVFTVVVSGGSLIKSLRKLVEPPYIDSIDWSKWHVFWVDERVVPKNADHPDSNYLLAYDGFLSKIPIPAGNVHAINDALSAEAAADDYETCLRHLVKSKILDISEESGFPKFDVMLLGMGPDGHVASLFPGHPLVHEKAKWVTFIKDSPKPPPNRITFTFPVINSSANIALAIVGAGKADVVHKSLGDDKSSDLLPVQMVSPEGELVWFLDKDAASKL	At5g24400	XP_025887973.1	4	21	3	1.61	0.0103821	5	1	6	7.1.2	OPP.oxidative PP.6-phosphogluconolactose	-	-	2	-	-	not Cp	C	97.01	plastid stroma	peroxisome plastid	-
Solyc03g082580	PGL4	Glucosamine-6-phosphate deamise (AHRD V1 ***- GB_ACHLI); contains Interpro domain(s) IPR005900 6-phosphogluconolactose	MAVSLASSSPILSSISPTRFSPIRRSILLTSFSVAGKPLFCSHPHRTSSNSWRSQCRTKASMAESVTGKSKAEVKLYDSEEELATALAKYTADLSEKFCKERDAFTVVVSGGSLIKSLRKLVEPPYINSIDWSKWHIFWVDERVVPKNADHPDSNYLLAYNGFLSKIPIPAGHVYAINDALSAEAAADDYETCLRHLVKSKIVDISKESGFPKFDVMLLGMGPDGHIASLFPGHPLVHEKEKWVTFIKDSPKPPPNRITFTFPVINSSANIALAIVGAGKADVVQKSLGDDKSSDLLPVQMVSPEGELVWYLDMDAASKL	At5g24400	NP_001296736.1	4	16	4	0.848	0.00546834	5	3	8	7.1.2	OPP.oxidative PP.6-phosphogluconolactose	Cp	59	1	Cp	Cp	Cp	Cp	100	plastid stroma	peroxisome plastid	-
Solyc07g045540	G6PD1	Glucose-6-phosphate 1-dehydrogenase (AHRD V1 **** O65856_TOBAC); contains Interpro domain(s) IPR001282 Glucose-6-phosphate dehydrogenase	MGMQLRLNPCSSSSAATSPSTLHNGAPYFCKKFNFLPFRTQPLNWVSGIYSRIQPRKHFEVFSSNGFPLNAVSVQDEQVPLTELGSGETTVSITVignaASGDLAKKKIFPALFALFYEDCLPENFVVFGYSRTKLSDEELRNMISTTLTCRIDKRENCDAKMEHFLERCFYHSGQYNSEDDFAELDYKLKEKEGCRISNRLFYLSIPPNIFVDVVRCASLKASSTSGWTRVIVEKPFGRDLESSSELTRCLKKYLTEEQIFRINADHYLGKELVENLSVLRFSNLVFEPLWSRNYIRNVQFIFSEDFGTEGRGGYFNADHYGIIRDIMQNHLLQILALFAMETPVSLDAEDIRNEKVKVLRSMRPLQLEDIVLGQYKGHSKGAKSYPAYTDDPTVPNG…	At5g35790	XP_004243567.1	15	30	9	2.535	0.016347	5	2	7	7.1.1	OPP.oxidative PP.G6PD	Cp	11	3	Cp	Cp	Cp	Cp	99.5	plastid stroma	plastid	-
Solyc11g033288	TRA2	Transaldolase (AHRD V1 ***- Q9FVH1_SOLLC); contains Interpro domain(s) IPR014634 Transaldolase, bacterial/plant type	MTSICKLSNPCFSSTSYGSRSSSTPKFVVHLRTSTFNHTLSGSKLSLVINPSIRASLCVKCSQADGNGSSVKKTTLHHLYETQGQSPWYDNLCRPVTDLIPLIDSGVRGVTSNPAIFQKAISTSNAYNDQFRELVQAGKDIDSVYWELVVKDIQDACKLFETIYDKTDGGDGYVSVEVSPRLADDTEGTVEAAKWLHKKVERSNVYIKIPATAPCIPSIKEVISLGISVNVTLIFSLSRYEAVIDAYLDGLEASGLSDLSRVTSVASFFVSRVDTLIDKLLEKIGTPEALDLRGKAANAQAALAYDLYQKKFSGPRWEALVKKGAKKQRLLWASTSVKNPAYPDTLYVDPLIGPDTVSTMPDQALQAFINADHGSVARTIDANLSEAEGIYSALEKLGI…	At5g13420	NP_001234354.2	11	36	11	2.162	0.0139417	5	0	5	7.2.2	OPP.non-reductive PP.transaldolase	Cp	60	1	Cp	Cp	Cp	Cp	98.05	plastid stroma	plastid	plastid
Solyc08g079070	TAL	Transaldolase (AHRD V1 **** D6N3G8_GOSHI); contains Interpro domain(s) IPR001585 Transaldolase	MSSSLHSPLYSSLSSSSALQDRKLRNAVNFAKPNLIFKPRRSFPLIRASAGFSSSLDTGLSTELDAVANHSEIVPDTVIFDDFEKFPPTAGTVSSSLLLGICGLPDTKFKSAVDRALSDSECYGLESSDLQMSCFFNKALAHVGGDLAKLVPGRVSTEVDARLAYDTHGIVRKVHDLLKAYTEIEVPPERLLFKIPATWQGIEASRVLEAEGIQTHLTFVYSFCQAAAAAQAGASVIQIFVGRLRDWSRNHTGDSEVESALRRGEDPGLALVTKTYNYIHKYGHKTKLMAAAVRNKQDVFNLLGVDYIITPLKVLQSLKESVTLPDEKYSFTRRLSPQSAAAFNFTQDELQKWDQYSFSSAMGPASVELLTIGLDGYINQAKRVEELFGKIWPPPNV	At1g12230	NP_001234076.2	13	71	13	7.799	0.050292	5	3	8	7.2.2	OPP.non-reductive PP.transaldolase	Cp	47	1	Cp	Cp	Cp	Cp	84	plastid stroma	plastid	-
Solyc08g013840	SGPP	Broad-range sugar phosphate phosphatase , SGPP; HAD-superfamily hydrolase subfamily IA variant 3 (AHRD V1 **-- B2IYD2_NOSP7); contains Interpro domain(s) IPR005834 Haloacid dehalogese-like hydrolase	MSALVSLCSVPLYVQNKQFYSTINFSKIATVVPQMSLSSSIFNQHESKCLLPVDAPLKAILFDIDGTLCDSDPIHYYAFREMLQEIGFNGGAPISEEFFVKNISGMHNDELCHVLFLDWEFERAVKFMDDKEDMFRRIASEQLKPLNGLEEVCKWIEDRGLKRAAVTNAPRPNAELIISMLGLSDFFELLIIGSECERAKPFPDPYLKALQELGVSPKHAFVFEDSISGIKAGVAAGMPVVGLGLRNPEKLLSEAGATFVIKDFNDSKLWTALEELEPEIHA	At2g38740	XP_004244740.1	3	4	3	0.874	0.00563601	4	2	6	35.1	not assigned.no ontology	Cp	33	5	Cp	-	not Cp	Cp	40.8	-	-	-
A Proteins were identified by acetone preparations and/or the gel method. For emPAI and Mol% calculations, only the data from the acetone prepartions were used. Proteins identified solely by the gel method have data for the number of peptides, PSMs and unique peptides.
B Names of tomato proteins were based on the literature, NCBI annotation (identified in BlastP searches), and/or SolyGenomics descriptor. In a small number of cases, tomato protein names were assigned based on NCBI annotations and the Arabidopsis homolog.
C Some Sol Genomics descriptors were updated when NCBI annotations and Arabidopsis gene annotations were aligned.
D Target P's subcellular locations are: chloroplast (Cp), mitochondria (M), secretory (S), and no predicted location is indicated by a dash (-).
E ChloroP was used to predict the presence of a chloroplast transit peptide (Y) and the lack of a predicted transit peptide is indicated with a dash (-).
F Predotar's predicted subcellular locations were: chloroplast/plastid (Cp),endoplasmic reticulum (ER) or mitochondrion (M). For proteins with localization predictions that were less clear, Predotar provided categorized of possibly Cp, M and ER. Proteins with unresolved locations or that did not have a homolog detected by Predotar are indicated with a dash (-).
G WoLF PSORT's and YLoc's predicted subcellular locations were: chloroplast/plastid (Cp), cytosol (C), cytoskeleton (Cy), endoplasmic reticulum (ER), extracellular (EX), golgi apparatus (G), mitochondrion (M), nucleus (N), peroxisomes (P), plasma membrance (PM), and vacuole (V). Proteins with no chloroplast location in WoLF PSORT are indicated by not Cp.The number of proteins predicted to be in t…
										0.196222

## Sheet: Table S7D. Major CHO
Table S7D. Major carbohydrate metabolism.
Category	Gene and protein descriptors						ProteomicsA					Times detected			Bin codes		Algorithms								Databases
	Tomato Gene ID	Gene nameB	DescriptionC	Protein Sequence	Arabidopis homolog	Tomato proteinB NCBI accession	Peptides	PSMs	Unique Peptides	emPAI	Mol%	Acetone samples	Gel samples	Total	Bincode	Name	TargetP D ver.1	Transit peptide length	TargetP (reliability class)	ChloroP E	Predotar F	WoLF PSORT G	YLoc G	YLoc % Confidence	PPDB	SUBA4	plprot
Sucrose catabolism	Solyc02g091490	FRK3	Fructokinase 3 (AHRD V1 **-* Q6VWJ5_SOLLC); contains Interpro domain(s) IPR011611 Carbohydrate/purine kinase	MALHATAFSFTGVSTSSKSSRSALLSVFPLPrRNACTVKATSQYPHSFPRCKIQgranaLPSDNGLVEKDESSLVVCFGEMLIDFVPTTSGLSLAEAPAFKKAPGGAPANVAVGISRLGGSSAFIGKVGEDEFGYMLAEILKENNVNSDGMRFDPGARTALAFVTLRKDGEREFMFYRNPSADMLLQEDELDLELIRKAKVFHYGSISLITEPCKSAHIAAAKAAKDAGVILSYDPNLRLPLWPSAESAREGILSIWNTADIIkinaseEEISFLTQGEDPYDDNVVRKLYHPNLKLLLVTEGPEGCRYYTKDFSGRVKGIKVDAVDTTGAGDAFVAGILSQLASDVSLLQDEGKLRDALSFANACGALTVMERGAIPALPTKEVVLNALLKSVA	At1g66430	NP_001234396.2	11	106	9	4.179	0.0269484	5	3	8	2.2.1.1	major CHO metabolism.degradation.sucrose.fructokinase	Cp	33	2	Cp	Cp	Cp	Cp	94.9	plastid stroma	plastid	plastid
	Solyc04g081400	HXK	Hexokinase 1 (AHRD V1 ***- B6V3C0_CUCME); contains Interpro domain(s) IPR001312 Hexokinase	MSVTVSSPAVRSFHVSRSPHKTISRPRVIISAVRSTDSLGVAPILTKLQKDCATPLPVLRHVADAMADDMRAGLAVDGGSDLKMILSYVDTLPTGNEKGLFYALDLGGTNFRVLRVQLGGKEERVVATEFEQVSIPQELMFATSEELFDFIASALGKFAQKEGGNFELQQGRTREIGFTFSFPVKQTSIRTGILIKWTKGFAVSGTAGKDVVACLNEAMERRGMDMQVSALVNDTVGTLAGARYWDDDAMVAVILGTGTNACYVERVDAIPKLAKRMSKSPITIVNTEWGAFSNGLPLTEFDREMDAESINPGEQIFEKTISGMYLGEIVRRVLVKMAKVGGLFGSSYVPEKLVTPFVLRTPDICAMQQDTSIDLEAVESVLYDVAGVKSDLSARKTVV…	At1g47840	NP_001234717.1	8	19	8	0.995	0.00641628	5	1	6	2.2.1.4	major CHO metabolism.degradation.sucrose.hexokinase	Cp	31	3	Cp	Cp	Cp	M	73.1	plastid	plastid	-
	Solyc11g007270	INVE	Neutral invertase (AHRD V1 ***- Q8L6W3_BETVU); contains Interpro domain(s) IPR006937 Plant neutral invertase	MATSEAFLQVLGGSLPSLFGSDDSFRKLGSSHTSRSFIRIRKKRGPICVNFLNCSHISYRAIRVDCFQSTRQCVHGDIGHSNLRSVNCKCQQADSASSFASEKGNGSWTIDNDQSFDTVHGNTPSVMQFETVRELKVGEENFQSNGSLPPNGLVEDTLNRIAGNSIEDEAWELLRESMVYYCGSPVGTIAAKDPTSSTADVLNYDQVFIRDFIPSGIAFLLKGEYEIVRNFILHTLQLQSWEKTMDCHSPGQGLMPASFKVRTVPLDGDDSATEEVLDPDFGEAAIGRVAPVDSGLWWIILLRAYGKSSGDLSVQERIDVQTGIKMILRLCLADGFDMFPTLLVTDGSCMIDRRMGIHGHPLEIQALFHSALLCAREMLTPEDGSADLIRALNNRLVAL…	At5g22510	XP_004249987.1	4	8	3	0.389	0.00250847	4	2	6	2.2.1.3.1	major CHO metabolism.degradation.sucrose.invertases.neutral	Cp	53	3	Cp	possibly Cp	Cp	Cp	40.2	plastid stroma	plastid	-
Starch synthesis & targeting	Solyc01g079790	APL1	Glucose-1-phosphate adenylyltransferase large subunit, (AHRD V1 **** P93230_SOLLC); contains Interpro domain(s) IPR011831 Glucose-1-phosphate adenylyltransferase	MSVATDGRFALLRNNPAALTGTNLKIVKFCNGELMGKKLKYTKFQLRSNVVKPNICMSLTTDIAGEAKLKDLEAKKEDARTVVAIILGGGAGTRLFPLTKrRNAAKPAVPIGGAYRLIDVPMSNCINSGINKVYILTQFNSASLNRHIARAYNFGNGVTFGDGYVEVLAATQTPGELGKRWFQGTADAVRQFHWLFEDARSKDIEDVLILSGNADHLYRMDYLHFVQSHRQSGADITISSLPIDDSRASDFGLMKIDDTGRVMSFSEKPKGDDLKAMAVDTTVLGLSPEEAKEKPYIASMGVYVFKKDILLNLLRWRFPTANDFGSEIIPASTKEFCVKAYLFNDYWEDIGTIRSFFEANLALthePPRFSFYDATKPIYTSrRNANLPPSAIDNSKIV…	At5g19220	NP_001233977.2	26	293	24	21.638	0.139533	5	3	8	2.1.2.1	Starch synthesis & targeting	-	-	4	-	-	Cp	Cp	99.6	plastid stroma	plastid	plastid
	Solyc07g019440	APL2	Glucose-1-phosphate adenylyltransferase large subunit, (AHRD V1 **** P93223_SOLLC); contains Interpro domain(s) IPR011831 Glucose-1-phosphate adenylyltransferase	MDALCAGTAQSVAICNQESTFWGQKISGrRNALINKGFGVRWCKSFTTQQRGKNVTSAVLTRDINKEMLPFENSMFEEQPTADPKAVASVILGGGVGTRLFPLTSrRNAAKPAVPIGGCYRLIDVPMSNCINSGIRKIFILTQFNSFSLNRHLARTYNFGNGVGFGDGFVEVLAATQTPGDAGKMWFQGTADAVRQFIWVFENQKNKNVEHIIILSGNADHLYRMNYMDFVQKHIDANADITVSCVPMDDgranaSDFGLMKIDETGRIIQFAEKPKGPALKAMQVDTSILGLSEQEASNFPYIASMGVYVFKTDVLLKLLKSAYPSCNDFGSEIIPSAVKNADHNVQAYLFNDYWEDIGTVKSFFDANLALTKQPPKFDFNDPKTPFYTSARFLPPTK…	At1g27680	NP_001233947.2	8	13	7	1.096	0.00706758	5	0	5	2.1.2.1	major CHO metabolism.synthesis.starch.AGPase	Cp	79	5	Cp	-	Cp	Cp	99.9	plastid	plastid	-
	Solyc01g109790	APL3	Glucose-1-phosphate adenylyltransferase large subunit, (AHRD V1 **** Q15I66_SOLLC); contains Interpro domain(s) IPR011831 Glucose-1-phosphate adenylyltransferase IPR005836 ADP-glucose pyrophosphorylase, conserved site	MDTCCAAMKSTVHLGRVSTGGFNNGEKEIFGEKIRGSLNNNLRINQLSKSLKLEKKIKPGVAYSVITTENDTETVFVDMPRLErRNARANPKDVAAVILGGGEGTKLFPLTSRTATPAVPVGGCYRLIDIPMSNCINSAINKIFVLTQYNSAALNRHIARTYFGNGVSFGDGFVEVLAATQTPGEAGKKWFQGTADAVRKFIWVFEDAKNKNIENILVLSGNADHLYRMDYMELVQNHIDRNADITLSCAPAEDSRASDFGLVKIDSRGRVVQFAEKPKGFELKAMQVDTTLVGLSPQDAKKSPYIASMGVYVFKTDVLLKLLKWSYPTSNDFGSEIIPAAIDDYNVQAYIFKDYWEDIGTIKSFYNASLALTQEFPEFQFYDPKTPFYTSPRFLPPTK…	At4g39210	NP_001233918.2	6	13	5	0.562	0.00362407	4	0	4	2.1.2.1	major CHO metabolism.synthesis.starch.AGPase	-	-	3	-	-	Cp	Cp	100	plastid stroma	plastid	-
	Solyc07g056140	APS1	Glucose-1-phosphate adenylyltransferase small subunit (AHRD V1 **** D5L5Q9_SOLLC); contains Interpro domain(s) IPR011831 Glucose-1-phosphate adenylyltransferase	MAASIGALKSSPSSHNCINErRNANDSTRAISSRNLSFSSSHLAGDKLMPVSSLRSQGVRFNVrRNASPLIVSPKAVSDSQNSQTCLDPDASRSVLGIILGGGAGTRLYPLTKKRAKPAVPLGANYRLIDIPVSNCLNSNISKIYVLTQFNSASLNRHLSRAYASNMGGYKNEGFVEVLAAQQSPENPDWFQGTADAVRQYLWLFEEHNVLEYLILAGNADHLYRMDYEKFIQAHRETDADITVAALPMDEKRATAFGLMKIDEEGRIIEFAEKPQGEQLQAMKVDTTILGLDDKRAKEMPFIASMGIYVISKDVMLNLLRDKFPGANDFGSEVIPGATSFGMRVQAYLYDGYWEDIGTIEAFYNANLGITKKPVPDFSFYDRSAPIYTQPRYLPPSKM…	At5g48300	NP_001234696.2	19	215	13	9	0.0580367	5	3	8	2.1.2.1	major CHO metabolism.synthesis.starch.AGPase	Cp	58	1	Cp	Cp	Cp	Cp	100	plastid stroma	plastid	plastid
	Solyc08g083320	GBSS1	Granule-bound starch synthase (AHRD V1 **** B0ZTE3_SOLTU); contains Interpro domain(s) IPR011835 Glycogen/starch synthases, ADP-glucose type	MASITASHFVSRSSNVQTSLDTKSTLSQIGLRNHTLTHNGLRAVNKLDGLQSRTNTKVTPKMRSTKSATIVCGKGMNLIFVGTEVGPWSKTGGLGDVLGGLPPALAARGHRVMTISPRYDQYKDAWDTSVALEVKVGDSIEIVRFFHCYKRGVDRVFVNADHPMFLEKVWGKTGSKIYGPKAGLDYLDNELRFSLLCQAALEAPRVLNLNSSNYFSGPYGEDVLFIANDWHTALIPCYLKSMYQSRGIYLNAKVAFCIHNIAYQGRFSFSDFPLLNLPDEFRGSFDFIDGYEKPVKGRKINWMKAGILESHRVVTVSPYYAQELVSAVDKGVELDSVLRKTCITGIVNGMDTQEWNPATDKYTDVKYDITTVMDAKPLLKEALQAAVGLPVDKKIPLIG…	At1g32900	NP_001311457.1	14	42	14	1.581	0.0101951	5	3	8	2.1.2.2	major CHO metabolism.synthesis.starch.starch synthase	Cp	71	1	Cp	Cp	Cp	Cp	100	plastid stroma	plastid	plastid
	Solyc07g014590	ISA1	Isoamylase 1, Glycogen debranching enzyme (AHRD V1 ***- A7BWG1_9GAMM); contains Interpro domain(s) IPR006589 Glycosyl hydrolase, family 13, subfamily, catalytic region	MELLHSPSISTYKPKLNYQNHLFSRRNSKPVDFETIRRKSVVNAAVHRLAAKTAASAVVVEKSTTERCRFEVLSGKPLPFGATATDGGVNFAVFSRNATAATLCLITLSDLPEKRVTEQIFLDPLANKTGDVWHVFLKGDFENMLYGYKFDGKFCPEEGHYFDSSQIVLDPYAKAIVSRGEYGVLGPEDDCWPPMAGMVPSASDQFDWEGDLPLKFSQRNLVIYEMHVRGFTNHESSETKYPGTYLGVVEKLNADHLKELGVNCIELMPCHEFNELEYYSYNSVLGDYKFNFWGYSTVNFFSPMGRYSSAGLSNCGLGAINEFKYLVKEAHKRGIEVIMDVVFNHTAEGNENGPILSFRGIDNSVFYTLAPKGEFYNYSGCGNTFNCNNPIVRQFIVDC…	At2g39930	XP_004242868.1	1	1	1	0.101	0.0006513	1	0	1	2.1.2.4	major CHO metabolism.synthesis.starch.debranching	Cp	54	4	Cp	Cp	Cp	C	77.6	plastid	plastid	-
	Solyc09g064800	ISA2	Isoamylase 2, Glycogen debranching enzyme (AHRD V1 ***- B1R1G0_CLOBU); contains Interpro domain(s) IPR006589 Glycosyl hydrolase, family 13, subfamily, catalytic region	METSPIQLAVHSRLLSYGSTESTKLVPASSGNRGKIVCSLRKLELEDMNFSGISRNNDQEAPRRAHRLKALSGSRISLVPSAKRVPTYLFRTDIGCQVKVFVEKTNGKYKVLVEVLPLELSDAHSELVMVWGLFRSDASCFMPLDLNRRGADGKSSTVETPFVQGPSGKVTVELDFEVSLVPFYISFYMKSQLVSDMENSEIRSHRNTNFVVPVGLSSGHPAPLGISFQPDGYVNFALYSRSAKGVVLCLYDDISVEKPSLEIDLDPYINQSGDIWHAALDCSLPFKTYGYRFKAATSGKGELVLLDPYAKVIRSVIPRQGGSEIRPKYLGELCLEPGYDWSGDVPPSLPMEKLIIYRINVTHFTKDKSSKLPDNLAGTFSGISEKWHHLKDLGVNAML…	At1g03310	XP_004247144.2	5	9	5	0.468	0.00301791	5	1	6	2.1.2.4	major CHO metabolism.synthesis.starch.debranching	Cp	27	4	-	-	Cp	C	39.3	plastid	plastid	-
	Solyc02g091530	PTST	PTST; 5'-AMP-activated protein kinase subunit beta-1 (Fragment)	MNISILLRQSEIWKSVVIYERYKSDRIVIEKNILFMNLISAIAAELGIDESKKDIEIRYVVEGVALPCNCCFEFHQLGRNSLIMDCNLLNSLGQTCFPRFKVENIDGVRGNMTSYKSRIGFCRMHTLFSVPNWKLSIPCTSWKIFCAPENSLVVSEKIEDAGLSDPEQVPEQPLRTEELKLLLADAERSKLLKKLSEANRYNRLLKRELQAKEDAMVNFKSELSVTELEIQALARLAEEIAKSAIPAGSRKIKGRYIQSHLFSRLEAISEKLKEQIKGVEAVQAKEVPLSWVGVAESVQVMGSFDGWSQGEHLSPEYTGSYMNFSATLFLRPGRYEIKFLVDDEWKLSPELPTTGEGLTKNNLLVVE	At5g39790	XP_025885479.1	6	17	6	1.404	0.00905372	5	3	8	30.1	signalling.in sugar and nutrient physiology	-	-	4	-	-	Cp	C	99.82	plastid	-	-
	Solyc01g010460	PTST2	Protein targeting to starch (PTST) homolog 2	MVSLILTPTHLSFSPIPTPIVINSPKRLHCRRKAAIFNLVLGKNMGSFQVFKKLSKKRVGDSSYCLCRKGLGSEGDMELEEEILAFMEISENPNVFPTRKELEKAGRVDLVEAIKKRGGWFSFGWDSEDDDTNTVNVNVNEVESVEMNFDIEEFHERVKRCQESDLLHENEAHFSGSGDSSSSQPASSSGRSIETVAEENSGIEGILSRLEKERNSSLGIDLGKPGHTSHTSSRDNIDDRSFGTSDADRTDLRKNESLSKGSSMKDIQSDEEIYRSVSPARLRKWSIQRAGLQDIDFEAAEVALGKSWIGSTSEASGDDVVNITASRFEALQRSKNGNNNEMSTRLKHLELELSMTLRSLKSKSEEFSSKEVLICVFCFS	At1g27070	XP_019069687.1	1	1	1	0.155	0.00099952	1	0	1	29.4	protein.postranslational modification	Cp	29	2	Cp	possibly Cp	Cp	G	27.2	plastid	-	-
	Solyc09g008260	PTST3	Protein targeting to starch 3	MASLFHFPTSHKLFLPSQTLSPSICIRHNHHFFLICRSKSKIYASIKKSRASRKVKSNDDLCNDIREFLSSVGLPENADHVPTMKELSQNGRQDLANIVRRRGYKFVKELLLTSKQPAYECIGEDGLVEKSEDGSLDGKIADMAHDVSLPSEASAVDSYTNDASNDLILNSDEQNSGDQEFLGYSFLEEKVVNFIQNGELDSIEGSGFEIFQREGSIEGQNGAKILSGSPIAQSIQHDEHPSMQSSLMRNDSLSAEYLTMTEGISSADTEPHNMEIQAEINHLKFVLHQKELELTQLKQQIEEEKRLLSVLQIKAETEIREAERLISEKDAELNAAEDSLSGLKEVEIQYRAEGENVEVAGSFNGWHHKIKMDPQESPDPIGEDIQSSSDIVDPIGDDI…	At5g03420	XP_004246622.1	4	19	4	0.468	0.00301791	5	2	7	29.4.1	protein.postranslational modification.kinase	Cp	43	3	Cp	Cp	Cp	N	86.7	plastid	-	-
	Solyc04g082400	SBE2.2A	1,4-alpha-glucan branching enzyme (AHRD V1 **** Q08131_MANES); contains Interpro domain(s) IPR006589 Glycosyl hydrolase, family 13, subfamily, catalytic region	MEINFNVLSKPIRGSFPFSSPRVSPRASRTKICFPSQHSTGLKFGSEGRSWDISSTPKSRVRKDERMKHSSAISAVLTNDNSTMASREEDVKTENIGLLNLDPALEPYLNADHFRYRMKRYVDQKMLIQKYEGGLEEFAQGYLKFGFNREDGCIVYREWAPAAQEAEVignaDFNGWNGSNHMMEKDQFGVWSIRIPDVDSKPAIPHNSRVKFRFKHGEGAWVDRIPAWIKYATVDATKFAAPYDGVYWDPPPSERYNFKYPRPSKPRAPRIYEAHVGMSSSEPRVNSYREFADDVLPRIKANNYNTVQLMAIMEHSYYGSFGYHVTNFFAVSSRSGNPEDLKYLIDKAHSLGLQVLVDVVHSHASNNVTDGLNGFDIGQGSQESYFHAGERGYHKLWD…	At5g03650	XP_019069273.2	13	45	12	2.252	0.0145221	5	3	8	2.1.2.3	major CHO metabolism.synthesis.starch.starch branching	Cp	62	1	Cp	Cp	Cp	Cp	56.5	plastid stroma	plastid	plastid
	Solyc09g009190	SBE2.2B	1,4-alpha-glucan branching enzyme II (AHRD V1 **** P93691_WHEAT); contains Interpro domain(s) IPR006589 Glycosyl hydrolase, family 13, subfamily, catalytic region	MVYTLSGVRFPTVPSVYKSNGFTSSNGDrRNANANVSVFLKKHSLSRKILAEKSSYDSESRPSTVAASGKVLVPGTQSDSSSSSTDQFEFTETAPENSPASTDVDSSTMEQASQIKTENGDVEPSRSTEELEFASSLQLQEGGKVEESKTLDTSEETISDESNRIREKGIPPPGLGQKIYEIDPLLTNYRQHLDYRYSQYKKMREAIDKYEGGLEAFSRGYEKMGFTRSDTGITYREWAPGAQSAALIGDFNNWDANADIMTRNEFGVWEIFLPNNVDGSPAIPHGSRVKIRMDTPSGVKDSIPAWINYSLQLPDEIPYNGIYYDPPEEERYIFQHPRPKKPKSLRIYESHIGMSSPEPKINTYVNFRDEVLPRIKKLGYNAVQIMAIQEHSYYASFGY…	At5g03650	XP_004246561.1	24	118	24	6.386	0.0411802	5	3	8	2.1.2.3	major CHO metabolism.synthesis.starch.starch branching	Cp	63	3	Cp	Cp	Cp	Cp	41.9	plastid stroma	plastid	plastid
	Solyc03g083090	SS1	Starch Synthase 1, Glycogen synthase (AHRD V1 ***- D5MWN9_BACSU); contains Interpro domain(s) IPR011835 Glycogen/starch synthases, ADP-glucose type	MGSLRTPTNLSNKSCLCVSGRVVKGLRVERQVGLGFSWLLKGRRNRKVQSLCVTSSVSDGSSIAENKKVSEGLLLGPERDGSGSVVGFQLIPHSVAGDATMVESHDIVANDRDDLREDAEEMEETPIKLTFNIIFVTAEAAPYSKTGGLGDVCGSLPMALAARGHRVMVVSPRYLNGGPSDEKYANAVDLDVRATVHCFGDAQEVAFYHEYRAGVDWVFVNADHSSYRRPGTPYGDIYGAFGDNQFRFTLLSHAACEAPLVLPLGGFTYGEKCLFLANDWHASLVPLLLAAKYRPYGVYKDARSIVAIHNIAHQGVEPAATYNNLGLPPQWYGALEWIFPTWARAHALDTGETVNVLKGAISVADRILTVSQGYSWEITTPEGGYGLHELLSSRQSVLN…	At5g24300	XP_004234971.1	14	42	14	4.179	0.0269484	5	3	8	2.1.2.2	major CHO metabolism.synthesis.starch.starch synthase	Cp	19	5	Cp	possibly Cp	Cp	Cp	99.8	plastid stroma	plastid	plastid
	Solyc02g088000	SS2	Starch Synthase 2, Glycogen synthase (AHRD V1 **** D5MJP6_9BACT); contains Interpro domain(s) IPR011835 Glycogen/starch synthases, ADP-glucose type	MENSIVLHTGNQFHPSLPFFSFRPKKLSRIHGSSREQMWRIKRVKATGENSGEAASADESDDALQVTIEKSKKVLAMQQDLLQQIAERRKVVSSIKSSLADATGTYDGGSGSLSDVDIPDVDKDYNVTVPSTAATPITDVDKNTPPAISQDFVESKREVKRDLADERAPPLSRSSITASSQTSSTVSSKRILNVPPETPKFSQETLLNVNSRKSLVDVPGKKIQSYMPSLCKESSAQSLVEKRNENLEGSSAEANEETEDLVNIDEKPPPLAGTNVMNIILVASECAPWSKTGGLGDVAGALPKALARRGHRVMVVAPRYDNYPEPQDSGVRKIYKVHGQDVEVTYFQAFIDGVDFVFIDSHMFRHIGNNIYGGNRVDILKRMVLFCKAAIEVPWHVPC…	At3g01180	XP_004232219.1	11	56	11	1.913	0.012336	5	3	8	2.1.2.2	major CHO metabolism.synthesis.starch.starch synthase	Cp	45	4	Cp	possibly Cp	Cp	Cp	99.7	stroma	plastid	-
	Solyc02g080570	SS3	Starch synthase 3, Glycogen synthase (AHRD V1 *-** D4ZXV2_SPIPL); contains Interpro domain(s) IPR011835 Glycogen/starch synthases, ADP-glucose type	MDVPLPLHRPLSCTSVSNAITHLKIKPFLGFVSHGTTSLSVQSSSWrRNADVMVTGVPFPFCANFSGrRNArRNAKVSTPRSQQSSPKGFVPRKPSGMSTQRKVQKSNGDKESQSTSTSKESEISNQKTVEAKVETSDDDTKGVVRNADHKFLEDEDEINGSTKSISMSPGRGSSQFVESEEIGDDDNDAVKLNESKRLEESDFLIDSVIREQSGSQGETNDSSKGSHAVGTKFYEILQVDVEPQQLKEINAGSVEYTGPVASKLLEITKASDVQHTESNEIDYLDSNSFFKSDLVEEDDPLTAGTVETGDSSLNLRLEIEANLrRNAQAIERLAEENLLQGIRLFCFPEVVKPDEDVEIFLNRGLSTLKNEPDVLIMGAFNEWRYRSFTTRLTETHLN…	At1g11720	NP_001234623.1	25	84	25	4.012	0.0258715	5	3	8	2.1.2.2	major CHO metabolism.synthesis.starch.starch synthase	Cp	75	4	Cp	Cp	Cp	Cp	79.3	plastid stroma	plastid	-
	Solyc02g071040	SS4	Starch synthase IV, Glycogen synthase (AHRD V1 *-*- D1R4V0_9CHLA); contains Interpro domain(s) IPR011835 Glycogen/starch synthases, ADP-glucose type	MEMKISNCFPTQKWCGGASLSRQVNVRFYPLPSQRLPPASGKMRQrRNANFSLQNKKKQTKTINIERPPDVDLQLSDDIDSDTEKMSKQSLSNSNQEVPIEENVDTSTETKSSDESTYSSVDSNEEGQPSSVHLKDLIGMIRNAEKNIHLLNEARVHALEELQKVLGEKEDLHGKINILEMKLAETDARLRVASQEKIHVELLEDQLGKLKNELSSSRGSEENVLHVNNSVPLSRSDLVNSLSEQCDSLRKENMLLKQDLQSMKSELSLVKETDERILMLEKERSVLESSLSELESKLAASQEGVSELSALKLECKNLYEKVEHLQALLAKATKQADQAISVLQQNQELRKKVDRLEESLEEASIYKLSSEKLQQYNEQMQQKIKLLDERLQRSDEEIQ…	At4g18240	NP_001234617.2	6	10	6	0.326	0.00210222	4	0	4	2.1.2.2	major CHO metabolism.synthesis.starch.starch synthase	Cp	38	4	Cp	Cp	Cp	Cp	88.4	plastid	plastid	plastid
	Solyc07g042830	SS6	Starch Synthase VI, Glycogen synthase (AHRD V1 ***- D1R4V0_9CHLA); contains Interpro domain(s) IPR011835 Glycogen/starch synthases, ADP-glucose type	MDFTSCLSFPSSIAPNGNHSSSYNCSSSFNHRSCYNNISSKANLLKKQSYVFSKYQLRNFNIQLVPRIEAQLKAEQLEGSEAGCESDGLRWPSPSDEIPFWKGDFPSWDLSSDASSGVEQDSDLLHIVHVTAEMAPIAKVGGLGDVVTGLgranaCLNRGHKVDVMIPFYECIPKHCINELALMRTYNSYHDGNWVACNAYRGEVSGVPVILIEPSNHFFKGKNIYGGSYNELDAYLFFSRACLEWMQVNGTQPDIIHVHEWQTGALPLFYWDMYHFLSLQKPRIVLTIHNMEHYGECRQEQLSKFGLDGSAYATEDKAVDDRTVGHNPERLSLLKGGIVYSNAIVTVSPTYLKETLCSGWLSGALMRNRDKYSGILNGIDTEMWNPATDIYLPAKFDA…	At4g18240	NP_001234387.1	4	8	4	0.52	0.00335323	4	0	4	2.1.2.2	major CHO metabolism.synthesis.starch.starch synthase	Cp	41	2	Cp	Cp	Cp	Cp	100	plastid	plastid	plastid
Starch modification & degradation	Solyc02g066950	AMY3A	Alpha amylase 3 (IC) IPR006589 Glycosyl hydrolase, family 13, subfamily, catalytic region	MDYSTEALTDDEDGDSLGRSKVVGIDDDELLATRKSLSDVQARNKTIEKERDQLLEKVARSEAKQKEYLSTVMHDKDLAISELESAKALFNRKLEESLEEKFNLESKLVLAKQDAVELAVQVEKLAEIAFQQATSHILEDAQLRVSAAEASAAEAAFQIEEQIRTASDGAITYVLQQSKDAIEKALAVAESSGEHTTMAAFVDNMDRDDEIVTVQSQNIKLSNTLNDLESQLLVNRNEIDRVKLELKQARKEAKVYELRANDVEKLLLEFQESSRKAALQQEEEIKSSLEKMRKDATEKKKAASKAFKLELERMKTAIEAAKETARSQDEAYTRRCEALQRSLKAAEAASKTWRQRAEMAEDLLLRRSCSEEGDEEAIYRVNGGRIDFLMDDDSLKWKL…	At1g69830	XP_004233383.1	10	23	10	0.931	0.00600357	5	1	6	2.2.2.1.1	major CHO metabolism.degradation.starch.starch cleavage.alpha amylase	-	-	2	-	-	Cp	N	80.7	plastid stroma	plastid	plastid
	Solyc05g007070	AMY3B	Alpha amylase 3 (IC) (AHRD V1 *-** Q010P9_OSTTA); contains Interpro domain(s) IPR006589 Glycosyl hydrolase, family 13, subfamily, catalytic region	MSTVTMEPLVGHYLRRSPKLYPNQKKTSHFSLNFSRRPLSGTATLRFCDYRRSRTVPIRASSTDAAVIETSEQSDVVFKETFSLKRPERAEGKISIRLDKGKDEENWNLTVGCSLPGKWILHWGVHYTDDTGSEWDQPPPEMRPSGSIAIKDYAIETPLQGDTFQEVKIDISSKWSIAAINFVLKDEETGVWYQHRGRDFKIPLVDCLDNDANIVGVKKESNIWSGSLGKLSNILLNPEASPSKGESSSNEGSSAKNWRLEGFYEEHAIVKETLVDNIVNVSVKLCPETAKNILCIDTDLPGNVILHWGICKGDTKIWELPAMPYPAETVVFKNKALRTLLQRKEGGNGSSGLFTLDVGLAGFVFVVKLDENTWLNCKGDDFYVPLSSGTLHLEESKQS…	At1g69830	XP_004238770.1	1	5	1	0.058	0.000374014	5	0	5	2.2.2.1.1	major CHO metabolism.degradation.starch.starch cleavage.alpha amylase	Cp	59	4	Cp	Cp	Cp	C	85.2	plastid stroma	plastid	plastid
	Solyc08g007130	BMY3A	Beta-amylase 3 (AHRD V1 **** D7MC27_ARALY); contains Interpro domain(s) IPR001554 Glycoside hydrolase, family 14	MALTPCSSTSFINKKERKNYRTHDDISSMICFAKINPPSYNLKAKSYNQEVQFLNPNMEEKEKFHMLTSGTHSNNSSSTKVPVFVMLPLDTISIGGNMNKPRAMNASLMALKGAGVEGVMVDCWWGLVEKDGPLKYNWEGYDELVKMVQANGLKLQVVMSFHQCGGNVGDSCSIPLPPWVLEEISKNPDIVYTDRSGRRNPEYISLGCDQLPVLRGRTPIQVYTDYMRSFREKFKNYLGDVIVEIQVGMGPCGELRYPSYPESNGTWRFPGIGEFQCYDKYMKASLAASAHAMGKESWGRGGPHDSGQYNQFPEETGFFKKDGTWNSEYGQFFLEWYSRKLLEHGDNILASAEGIFKGTGCKLSGKVAGIHWHYNTRSHAAELTAGYYNTRNKDGYLPI…	At4g17090	XP_004244551.1	3	5	2	0.359	0.00231502	2	0	2	2.2.2.1.2	major CHO metabolism.degradation.starch.starch cleavage.beta amylase	-	-	3	-	possibly Cp	not Cp	Cp	46.4	plastid stroma	plastid	-
	Solyc08g077530	BMY3B	Beta-amylase (AHRD V1 **** Q5F305_SOYBN); contains Interpro domain(s) IPR001371 Glycoside hydrolase, family 14B, plant	MTLTLQSSASFINFKETKGVKTPDEFLGMVSFAQAKPSSCRLVAKSSMQEAQLSHERIMEVRKIEKREKLHELTANHSNSSTRVPVFVMLPLDTMTMGGNLNRPRAMNASLMALKSSGAEGVMVDAWWGLVEKDGPLKYNWEGYAELVNMCREHGLKLQVVMSFHQCGGNVGDSCSIPLPPWVLEEISKNPDLVYTDRSGRRNPEYLSLGCDMLPVLKGRTPIQVYTDYMRSFRERFNNYLGNIIVEIQVGMGPCGELRYPAYPESNGTWRFPGIGEFQCYDKYMRASLAAAAKATGKDDWGQGGPHDSGQYNQFPEDTGFFQRDGTWNSDYGQFFLEWYSGKLLEHGDRILAAGESIYQGTGAKLSGKIAGIHWHYNTRSHAAELTAGYYNTRHRDGY…	At4g17090	XP_004245844.1	4	5	3	0.425	0.00274062	2	0	2	2.2.2.1.2	major CHO metabolism.degradation.starch.starch cleavage.beta amylase	-	-	5	-	Cp	Cp	C	43.9	plastid stroma	plastid	-
	Solyc04g082290	ESV1	Early starvation 1-like	MAASASSRGFTAPIGAAKLPTVEVFPTLPNGFVEFRRKKRSSTGGFFSIQCCCSDSVMPIRGGSGSGNGVDKGDDGRFDSKKITANYMRTQASSPMPFASPQSRFVSKPEKFFSRCTPRSSGPKSRDSPPKRDTGIANEKDWGISMLNDNVNETGVNEDGSTWYRESGEDLGDNGYRCRWTRMGGQSSDGTLEWKETWWEKSDWTGYKELGVEKSGKNVEGDAWWETWREVLHQDEWSNLARIERSAQKQAKSGTENAGWYENWWEKYDAKGWTEKGAHKYGRLNEQSWWEKWGEHYDGRGSVLKWTDKWAETELGTKWGDKWEEKFFAGIGSRQGETWHVSPVGDRWSRTWGEEHFGNGKVHKYGKSTTGESWDIVVDEGTYYEAEPHYGWADVVGNS…	At1g42430	XP_004238417.1	2	5	2	0.389	0.00250847	5	1	6	35.2	not assigned.unknown	Cp	61	4	Cp	Cp	Cp	C	41.9	plastid stroma	-	-
	Solyc12g094570	ESV1-like	Early starvation 1-like	MAGSSSSRRMEVVNLARIERSAQKQAKSGTEGWYENWSEKYDAKGWTEKGAHKYGRLNEQSWWEKWGEEYDGRGSVLKWTDKWAESELGTKWGDKWEEKFVAGIGSRQGETWHASLSSERWSRTWGEEHFGNGKVHKYGKSTTGESWDMVVDEKTYYEAEPHYGWADVVGDSSQLFSIQPREQPPGVYPNIDFGSSVPPDDESPPTR	At1g42430	XP_004253200.1	4	10	4	2.162	0.0139417	5	0	5	35.2	not assigned.unknown	M	9	4	-	-	not Cp	N	78.4	plastid stroma	-	-
	Solyc04g053120	DPE1	Disproportionating enzyme 1; 4-alpha-glucanotransferase (AHRD V1 ***- Q9LV91_ARATH); contains Interpro domain(s) IPR003385 Glycoside hydrolase, family 77	MAIHTCFTLIPSSLSSPKLPFPKNTIFPKLSKPTFMFDRKSSFQNGTAAVPAVGEDFPIDYANWLPKRDPNDrRNARAGILLHPTSFPGPYGIGDLGPEAFKFLDWLHLAGCSLWQVLPLVPPGKRGNEDGSPYSGQDANCGNTLLISLEELVDDGLLKKEELPEPLPTDRVNYSTISEIKDPLITKAAKRLLSSEGELKDQLEKFrRNADPNISSWLEDAAYFAAIDNSVNTISWYDWPEPLKNRHLGALEEVYQREKDFIDIFIAQQFLFQRQWKKVRDYARSKGISIMGDMPIYVGYHSADVWANKKQFLLNRKGFPLIVSGVPPDAFSETGQLWGSPLYDWKAMEKDGFSWWVrRNAIQRAMDLFDEFRINADHFRGFAGFWAVPSEEKIAILGR…	At5g64860	XP_004237445.1	14	65	14	7.913	0.0510271	5	2	7	2.2.2.4	major CHO metabolism.degradation.starch.D enzyme	Cp	48	2	Cp	Cp	Cp	Cp	99.4	plastid	plastid	-
	Solyc11g007830	DSP4	Dual-specificity protein-like phosphatase 3 (AHRD V1 ***- Q3S4H5_MAIZE); contains Interpro domain(s) IPR000387 Dual-specific/protein-tyrosine phosphatase, conserved region IPR020422 Dual specificity phosphatase, subgroup, catalytic domain	MNCLQNLPRSSGLPLRSFTGNSRKLYSTVVSLGMTKFADQRLSIVAQVVSGPESTTEKDEEKSDTYSHDMTAAMGAVLTYRHELGMNYNFIRPDLIVGSCLQTPEDVDKLRSIGVKTIFCLQQNPDLEYFGVDINAIREYANKCGAIEHLRAEIRDFDAFDLRLRLPAVISILNKAINRNGGVTYIHCTAGLGRAPAVALTYMFWVQGYKLSEAFDLLMSKRSCFPKLDAIKSATADILTGLKKMPVTLTWHGDNCTTVEISGLDIGWGQRIPLKFDEERGLWTLQKDLHEGKYEYKYIVDGEWICNEFEPITSPNKDGHVNNYVEVLDENPDNITSAAVRKRLTGDDPDLTSDERLIIERFLEAHADVE	At3g52180	NP_001233952.1	9	30	6	3.87	0.0249558	5	3	8	2.2.2.10	major CHO metabolism.degradation.starch.laforin like phosphoglucan phosphatase (SEX4)	M	26	2	Cp	-	Cp	M	54.4	plastid stroma	plastid	-
	Solyc05g005020	GWD1	R1 protein alpha-glucan water dikinase (AHRD V1 **** A8I6T5_CHLRE); contains Interpro domain(s) IPR002192 Pyruvate phosphate dikinase, PEP/pyruvate-binding	MSNSLGNNLLYQGFLTSTVLEHKSRITPPCVGGNSLFQQQVISKSPLSTEFRGNRLRVQKNKKIPMGKKRAFSTYPHALLTTDTSSELAEKFSLEGNIELQVDVRPPTSDDASFVDFQVTNGSDKLFLHWGAVKFGKETWSLPNDCPDGTKVYKNKALRTPFVKSGSNSILRLEILDTAIEAIEFLIYDEARDKWIKNNGGNFRVKLSRKEIRGPDVSVPEELVQIQSYLRWERKGKQNYTPEKEKEEYEAARTELQEEIARGASIQDIRARLTKTNDKSQSKEEPPHVTESDIPDDLAQVQAYIRWEKAGKPNYPPERQIEELEEArRNAELQLELEKGITLDELRKKITKGEIKTKVEKHLKRSSFAVERIQRKKRDFGQLINKYPSSPAVQVQKVL…	At1g10760	NP_001234405.2	33	124	33	5.861	0.0377948	5	3	8	2.2.2.3	major CHO metabolism.degradation.starch.glucan water dikinase	Cp	57	4	Cp	-	Cp	Cp	66.3	plastid stroma	plastid	plastid
	Solyc09g098040	GWD3	Phosphoglucan water dikinase (AHRD V1 *-** A8J6C3_CHLRE); contains Interpro domain(s) IPR013783 Immunoglobulin-like fold	MDSMHLSHYYSVLNVKKRQPQIKILKQFNVVHQISHTSVRNLTLLPATNLGFFMDRRVKGIVCGVSSVETRENQNKGKNKSSSEKVQLRFRLNADHQVEYGEHIAVLGSAKELGSWKKNIMMDWTENGWIGELEVRSGEILEYKFVIVGKDKNMLWENGSNRILKLPEGGSFELVCQWNVTDEPVNLLSLDPFEVEKLVEETSDNGATITSQAVVPDVVTSPFVEQWQGRAASFVRSNDQLDSDKNRKWDTSGLTGISLKLVEGDKNARNWWRKLEVVRELVVENMDSSHRLEALTYAAVYLKWINTGQIPCLEDGGHHRPNRHAEISRLIFREVEKVLSRKDTTLQEILVIRKMQPCLPSFKAEFTASVPLTRIRDIAHRNDIPHDLKQEIKHTIQNK…	At5g26570	XP_004248008.1	26	91	26	2.643	0.0170434	5	3	8	2.2.2.3	major CHO metabolism.degradation.starch.glucan water dikinase	-	-	3	Cp	possibly Cp	Cp	C	82.7	plastid stroma	plastid	plastid
	Solyc08g075530	HGL1	Alpha glucosidase-like protein, Heteroglycan glucosidase 1 (AHRD V1 **** Q93Y12_ARATH); contains Interpro domain(s) IPR000322 Glycoside hydrolase, family 31	MDKLPFPNSIIISPKCHFTTLCFVNVRVSNGSLKKKKPKLLNCANLLSSTSVSSIHRLIRGRSVNKGFIGASFVMLKMGGIEGTTAMSDARTGNMIFESILEEGVFRFDCSADDRNAAFPSISFVDPKVRETPLMSIHKVPSYIPTFECVRGQQIVNIELPSGTSFYGTGEVSGQLERTGKRILTWNTDAWGYGPGTTSLYQSHPWVLAVLPSGETLGVLADTTHRCEVDLRQESNIRFISRQSFPVITFGPFPSPIDVLVSLSHAIGTVFMPPKWSLGYHQCRWSYVPDTRVREIARTFREKKIPCDVIWMDIDYMNGFRCFTFDKERFPDPESLVEELHKSGFKAIWMLDPGIKNEKGYFAYDSGSEADVWVQTADGRPYVGDVWPGPCVFPDFTQL…	At3g23640	XP_004246000.1	1	4	1	0.051	0.000328874	4	0	4	2.2.2.1	major CHO metabolism.degradation.starch.starch cleavage	Cp	48	2	Cp	possibly Cp	Cp	PM	45.1	-	ER	plastid
	Solyc06g009220	ISA3	Isoamylase 3, Glycogen debranching enzyme (AHRD V1 ***- B1R1G0_CLOBU); contains Interpro domain(s) IPR006589 Glycosyl hydrolase, family 13, subfamily, catalytic region	MIRGPPQIVQKCTTGIVTVNRTNIVQRTHRHDLRQLSRRDSLRLFSSNADHRILKFCTSEEALLPRLVAAAKLQEEAPQMLDTLPSFEVSPGLTHPLGVSEIESGINFAIFSQHASAVTLCIILPKSVHDGMIELALDPQKNRTGDIWHICIKELPRGGVLYGYRIDGPRNWHEGHRFDDSIILIDPYAKLIEGRRAFGDESNKMCRFFGTYDFNSLPFDWGENYKLPNVPEKDLVIYEMNVRAFTADETSSLDQDQRGSYLGLIEKIPHLLELGVNTVELLPVFEFDELELQRRPNPRNADHMINTWGYSTINFFAPMSRYASCGGGPVRASWELKEMVKALHGAGIEVILDVVYNHTNEADDENPYTTSFRGIDNKVYYMVDLNNNAQLLNFSGCGN…	At4g09020	XP_004240554.1	7	21	7	0.778	0.00501695	5	3	8	2.2.2.8	major CHO metabolism.degradation.starch.ISA3	Cp	34	3	-	possibly M	Cp	C	60.8	plastid stroma	plastid	plastid
	Solyc12g062250	LSF1	Phosphoglucan phosphatase LSF1; 5'-AMP-activated protein kinase beta-1 subunit (AHRD V1 *--- C6LYW2_GIALA); contains Interpro domain(s) IPR001478 PDZ/NADHR/GLGF	MSLELTHIFMHTNYTTSFYNQSHCSLKMCSLQLPNCRVFNDANFSSSSDKLQKCVVFSSFWGVELCFSDARLTASSAVKRRQYRPISAMSSSSDSPFNMNLNEYMVTLVKPLGIRFALSVDGKVFVHALKKGGNAEKSRIIMVGDTLKKASDSSTGGLIEINDFGDTEKMMNENAGPCSLVLERPSFPFPIHQLYLMDDIDILYNRGRVPIATWNKNLLASNLRTSCEGSGNSGFVVFSPKLLTLNGWNVLSNGDPIRQQGNLNGTPWLPFSPIINIFSEKDMIDSEWAHGNFPLEEYIKALDRSKGELYYNHDLGMRYNKITEQMYVGSCIQKESDVEILSDVGITAVVNFQSGIEAENWGINADIINESCQRFNILMINYPIRSPACVVAYLHWMTD…	At3g01510	XP_015061440.1	3	7	3	0.585	0.00377238	5	2	7	26.13	misc.acid and other phosphatases	-	-	5	Cp	-	Cp	V	41.6	plastid stroma	plastid	plastid
	Solyc06g050230	LSF2	Phosphoglucan phosphatase LSF2 Dual specificity phosphatase, subgroup, catalytic domain	MEEYNLAMKRMMRNPYEYHHELGMNYTLITEDLIVGSQPQKIEDINADHLKEEENVSFILNLQQDKDIEFWGIDLQSIVTRCSELGINHMRRPARDFDPDSLRSVLPKAVSSLEWAISEGKGRVYVHCTAGLGRAPAVSIAYMFWFCGMDPMIHLFQRDPVVPTKGQYEVLPMIWLKMISGRSPLRICQIMPLWM	At3g10940	XP_004240876.1	3	3	3	-	0	0	2	2	35.2	not assigned.unknown	-	-	2	-	-	C	C	83.3	plastid stroma	plastid	-
	Solyc03g065340	PHS1A	Phosphorylase (AHRD V1 **** B9SJB6_RICCO); contains Interpro domain(s) IPR011833 Glycogen/starch/alpha-glucan phosphorylase	MATANGAHLFNHCGSNSRFIHFTSRNTTSKLFLTKTSHFRTPKRSFHVNNILTDKIHHPITEQGGESDLSCFSPDAASITSSIKYHAEFTPVFSPERFELPNAFFATAQSVRDSLLINWNATYDVYEKLNMKQAYYLSMEFLQgranaLLNAIGNLELTGAFAEALKNLGHNLENVASQEPDAALGNGGLGRLASCFLDSLATLNYPAWGYGLRYKYGLFQQRITKDGQEEVAEDWLEIGSPWEVVRNDVSYPIKFYGKVSTGSDGKRYWIGGEDIKAVAYDVPIPGYKTRTTISLRLWSTQVPSADFNLSAFNAGEHTKACEAQANAEKICYILYPGDESEEGKILRLKQQYTLCSASLQDIISRFErRNASGDRIKWEEFPEKVAVQMNDTHPTLCI…	At3g29320	NP_001362574.1	24	85	20	3.19	0.0205708	5	3	8	2.2.2.2	major CHO metabolism.degradation.starch.starch phosphorylase	Cp	44	2	Cp	Cp	Cp	Cp	98.9	plastid stroma	plastid	plastid
	Solyc05g012510	PHS1B	Phosphorylase (AHRD V1 **** B9HXL0_POPTR); contains Interpro domain(s) IPR011833 Glycogen/starch/alpha-glucan phosphorylase	MATFAVSGLNSISSFNNNFRSKNSNIFLSRKRSLLFNLrRNArRNARSFYVSNVASDQKQKTKDSSSDEGFTLDVYQPDSTSVLSSIKYHAEFTPSFSPEKFELPKAYYATAESVRDMLILSWNATYEYYEKMNVKQAYYLSMEFLQgranaLLNAIGNLGLNGPYADALTKLGYSLEDVARQEPDAALGNGGLGRLASCFLDSMATLNYPAWGYGLRYQYGLFKQLITKDGQEEVAENWLEMGNPWEIVRNDISYPVKFYGKVIEGADGSKEWVGGEDITAVAYDVPIPGYKTKTTINLRLWSTKLAAEAFDLHAFNNGNADHAKAYEAQKKAEKICYVLYPGDESLEGKTLRLKQQYTLCSASLQDIIARFEKRSGNAVNWDQFPEKVAVQMNDTHP…	At3g29320	XP_004239069.1	24	127	20	4.337	0.0279672	5	3	8	2.2.2.2	major CHO metabolism.degradation.starch.starch phosphorylase	Cp	51	1	Cp	Cp	Cp	Cp	81.5	plastid stroma	plastid	plastid
	Solyc02g077680	PHS2	Phosphorylase (AHRD V1 **** B9H2Q8_POPTR); contains Interpro domain(s) IPR011833 Glycogen/starch/alpha-glucan phosphorylase	MAAIAVPLLAVRSPQANLQFPSIFNLNRPFSTSLFSNAFTHVKVSSTTSSSNQVVTETTCTSSSTISVQNDDALDTTLFVIRAKNRIGLLQIITRVFKVLGLKIEKAIIEFEGEFFVKKFYVNDSNGKKIEKVEYLEKIQKALLEAIDGDDGGAGVTAPSAVAVSGRGVVVRKPGLKMELGDRKAKVEKMFGLMDEFLKNDSISLQKDILNADHVEFTVARSRFSFDDFEAYQALAHSVRDRLIERWHDTHQYFKKKDPKRIYFLSLEFLMGRSLTNSVTNLGIQDEYADALTQLGFDFEVLAEQEGDAALGNGGLARLAACQMDSLATLDYPAWGYGLRYQYGLFRQIIVDGFQHEQPDFWLNFGNPWEIERVHVSYPVKFYGTVEEEVLNGKKCKIW…	At3g46970	XP_010316777.1	14	42	14	1.371	0.00884092	5	1	6	2.2.2.2	major CHO metabolism.degradation.starch.starch phosphorylase	Cp	82	1	Cp	Cp	Cp	Cp	93.9	-	cytosol	-
A Proteins were identified by acetone preparations and/or the gel method. For emPAI and Mol% calculations, only the data from the acetone prepartions were used. Proteins identified solely by the gel method have data for the number of peptides, PSMs and unique peptides.
B Names of tomato proteins were based on the literature, NCBI annotation (identified in BlastP searches), and/or SolyGenomics descriptor. In a small number of cases, tomato protein names were assigned based on NCBI annotations and the Arabidopsis homolog.
C Some Sol Genomics descriptors were updated when NCBI annotations and Arabidopsis gene annotations were aligned.
D Target P's subcellular locations are: chloroplast (Cp), mitochondria (M), secretory (S), and no predicted location is indicated by a dash (-).
E ChloroP was used to predict the presence of a chloroplast transit peptide (Y) and the lack of a predicted transit peptide is indicated with a dash (-).
F Predotar's predicted subcellular locations were: chloroplast/plastid (Cp),endoplasmic reticulum (ER) or mitochondrion (M). For proteins with localization predictions that were less clear, Predotar provided categorized of possibly Cp, M and ER. Proteins with unresolved locations or that did not have a homolog detected by Predotar are indicated with a dash (-).
G WoLF PSORT's and YLoc's predicted subcellular locations were: chloroplast/plastid (Cp), cytosol (C), cytoskeleton (Cy), endoplasmic reticulum (ER), extracellular (EX), golgi apparatus (G), mitochondrion (M), nucleus (N), peroxisomes (P), plasma membrance (PM), and vacuole (V). Proteins with no chloroplast location in WoLF PSORT are indicated by not Cp.The number of proteins predicted to be in t…
											0.622585

## Sheet: Table S7E. Minor CHO
Table S7E. Minor carbohydrate metabolism.
Gene and protein descriptors						ProteomicsA					Times detected			Bin codes		Algorithms								Databases
Tomato Gene ID	Gene nameB	DescriptionC	Protein Sequence	Arabidopis homolog	Tomato proteinB NCBI accession	Peptides	PSMs	Unique Peptides	emPAI	Mol%	Acetone samples	Gel samples	Total	Bincode	Name	TargetP D ver.1	Transit peptide length	TargetP (reliability class)	ChloroP E	Predotar F	WoLF PSORT G	YLoc G	YLoc % Confidence	PPDB	SUBA4	plprot
Solyc11g067160	-	Aldo/keto reductase family protein (AHRD V1 ***- D7LJ14_ARALY); contains Interpro domain(s) IPR001395 Aldo/keto reductase	MGSTAVSTQQAFFNLQKFTPLSYASSCRSIRSKRKCVIPIKCCSPSPASEVATAAKENrRNAELLKNGDDKLEICRVLNGMWQTSGGWGRIDRNDAVEAMLNYADAGLSTFDMANADHYGPAEDLYGIFINRVrRNAERPPELLETVRGLTKWVPPPVKMTRSFVSESIDVSrRNARMDVAALDMLQFHWWDYSNPGYLDALKHLTDLKGEGKIKTIALTNFDTERLRIILENGIPVVSNQVQHSIVDMRPQQKMAELCQLTGVKLITYGTVMGGLLSEKFLDTNLTIPFAGPALNTPSLQKYKRMVDAWGGWSLFQELLRTLKTVANKHGVSIPTVAVRFILDQPAVAGSMIGVRLGLSQHIKDANAVFSLVLDEEDISNILQVTNKGRDLQKVigna…	At2g27680	XP_004251040.1	10	73	10	6.627	0.0427343	5	3	8	3.5	minor CHO metabolism.others	Cp	47	3	Cp	Cp	Cp	Cp	98.8	plastid stroma	plastid	plastid
Solyc07g043570	-	Aldo/keto reductase family protein IPR020471 Aldo_keto reductase subgroup	MRGQKQKIRGVAAESSVKLNSEEEDKVKLGGSDLKVTKLGIGAWSWGDTSYWNNFEWDDKKLKAAKTAFDASIDSGITFIDTAEVYGSRFSFGAINSETLLGRFIKERKEKDPEVEVAVATKFAALPWRLGRQSVLAALKDSLARMELSSVDLYQLHWPGIWGNEGYIDGLGDAVEQGLVKAVGVSNYSEKRLRDAYEQLKRRGIPLASNQVNYSLIYRLPEQNGVKAACDELGVTLIAYSPIAQGALTGKYTPENPPTGPRGQIYTPEVLTKLQPLINRIKEIGDSYNKTSTQVVLNWLIAQENVVPIPGAKEQAKEFGGALGWRLTQQEIDQLRSLASELKPVTGFPVEKL	At1g06690	NP_001317632.1	14	58	14	6.848	0.0441595	5	3	8	3.5	minor CHO metabolism.others	-	-	2	-	-	Cp	C	97.79	plastoglobules	plastid	plastid
Solyc10g007050	-	Enolase-phosphatase E-1 (AHRD V1 *-*- A8UQN2_9AQUI); contains Interpro domain(s) IPR010041 2,3-diketo-5-methylthio-1-phosphopentane phosphatase	MAIASAAPLLAMNGALKMATNSQQYVEGTIKVQNNSIPKPEQLIVISSFRGAEGKDGGREYVQLNHRYHNATVKLNQFGLDWTTTTHGPIHNCNGALSSTRNVKMSAKAGALASNGDIEPLRRCIVLDIEGTTTPISFVTDVLFPYARDNVGRHLDATYDSAETQEDIKLLRAQVQEDLENGVAGAVPIPSNDAGKERVIAALVTNVEAMIKADRKITALKELQGHIWQTGFKNNELEGVVFDDVPEALERWAASGIKVYIYSSGSRLAQRLLFGYTNYGDLRKYLCGFFDTTVGNKKETKSYHEITASLGVNADHPSEILFVTDVYQEAIAAKLAGLEVIISVRPGNGPLPDNHGFRTVKSFSEI	At5g53850	XP_004248260.1	8	41	8	5.813	0.0374852	5	3	8	3.5	minor CHO metabolism.others	Cp	50	5	-	-	Cp	C	99.3	-	plastid	-
Solyc08g078370	-	Kinase pfkB family protein (AHRD V1 **-- Q7XDM4_ORYSJ); contains Interpro domain(s) IPR011611 Carbohydrate/purine kinase	MAAFRLQSCNCPLLSGRSPPSTLLLHVPTRCNLTCNSSFTSVLGCGMAAVDFLVAVDSYPNPDDKIRSTSFQVQGGGNAGNALTCAARLGLSPRIISKVADDSQGKAILEELEADGVDTSFMVVSEGGHSTFSYVIVDSQAKTRTCIYTPGYPPMIPEDLSKSNLSSALDDVRFVYFDGVLQETELLSALVVAREAHRRNIPIVIDAESKRERVDDLLNLATYVVCSARFPQVWTEAPSIPAALVSVLLKLPNIKFVIVTLGEDGCMMLERAEAEDLQSEEIDVDELFKKMKQSIDTDATSATSISSDIAKLRAKGIGTVSGKLLLGTAEKIPPSELVDTTGAGDAFIGAVLYALCANMPPERMLPFASQVAGIGCRALGARAGLPQLTDPRLKPFLVN…	At4g28706	XP_004245786.1	2	3	2	0.389	0.00250847	2	0	2	3.5	minor CHO metabolism.others	M	6	5	Cp	Cp	Cp	V	66.2	plastid stroma	plastid	-
Solyc09g064240	-	Kinase pfkB family protein (AHRD V1 ***- Q7XDM4_ORYSJ); contains Interpro domain(s) IPR011611 Carbohydrate/purine kinase	MVSLGHMLPSGNVAGFNCRTLFQSFAPTLTTTTRNFSVKMSIPTTQSSILLPEDRIILGCGAVSVDFLAAVASYPNPDDKIRSTSFEVQGGGNTGNALTCAARLGLTPRIISKVADDSQGKGLLEELEADGVNSSFMVVSEGGNSPFTYIIVDNQTKTRTCIHTPGYPPMIPSDLSQSNLLSALDGAKLVHFDGRLHETAAIVAEEANRRGIPILIDAERKREGLDYLLNFASYVVCSTKFPQEWTEASSIPTALVSMLLRLPKVKFVIVTLGKDGCIMLQRTEMDNLLPEEMDVEVLFKKLNLEKDTNATLPACISSNVARLHAKGIGTITGKLLVGTAERIPETELIDTTGAGDAFIGAVLYSICANMPPEKMLPFAAQVAAIKCRALGARAGLPRS…	At4g28706	XP_004247121.1	6	24	6	2.415	0.0155732	5	3	8	3.5	minor CHO metabolism.others	Cp	34	5	Cp	possibly Cp	Cp	Cp	96.5	plastid stroma	plastid	-
Solyc06g053600	At1g04420-like1	Oxidoreductase aldo/keto reductase family protein expressed (AHRD V1 ***- Q10GW4_ORYSJ); contains Interpro domain(s) IPR020471 Aldo/keto reductase subgroup	MASCNTFTPGGIPSCRNFTRTFRSSSPTWRKSGVVTAKLAQKNAMQYRKLGDSDLNISEITIGTMTFGEQNTEKEAHEILSYAFDQGINIIDTAEAYPVPMRKETQGATDLYISSWMKSQPRDKVILATKVCGYSERSSYIRENAKVLRVDAANIRESVEKSLKRLNTDYIDLLQIHWPDRYVPLFGEFFYETSKWRPSVPFVEQLRAFQELIDEGKVRYIGVSNETSYGVMEFVHAAKVEGLPKIVSIQNSYSLLVRCHFEVDLVEVCHPNNCNIGLLSYSPLAGGTLSGKYLDSNSEAARKGRLHLFPGYMERYNKSLAKEATKKYEEVAKKHGLTLVELALGFARDRPFMTSSIIGATSVDQLKEDIDAFLTTERPLPPQVMDDIEDIFKRYRDPA…	At1g04420	XP_004241009.1	14	125	14	18.684	0.120484	5	3	8	3.5	minor CHO metabolism.others	Cp	36	2	Cp	Cp	Cp	Cp	82.4	plastid stroma	plastid	plastid
Solyc09g074310	At1g04420-like2	Oxidoreductase aldo/keto reductase family protein expressed IPR001395 Aldo_keto reductase	MAFAVPLFNLAPDLTVSRLCLGTMTFGEQNTLAESFQLLDKAFNSGINFFDSAEMYPVPQRAETHGRSEEYFGRWIRERNVPRDSVVFATKVSGPSGQMSWIRNGPESLDAQNITEAIDNSLLRVKTDYIDLYQIHWPDRYVPMFGETDYDPLRHYTPVGFEEQLDALKRAVDAGKIRYIGLSNETPYGIMKFQQVAKSTAGNLQIVSVQYNLLCRNFDSAMAECCHNERISLLAYSPLAMGILSGKYFAEDGGPSRLNLFKGRYKEGESRYDLSKSNVLYAAKSYVEIASRYGIHPVSLAIAFIMRHSLVASVVFGATKVWQLEEVLAACKVNLSPEIITEINKVHSRFPSPCP	At1g04420	XP_004247478.1	1	1	1	0.116	0.000748028	1	1	2	3.5	minor CHO metabolism.others	-	-	5	-	ER	Cp	ER	43.49	plastid stroma	plastid	plastid
Solyc02g085100	-	Putative glucose-6-phosphate 1-epimerase	MAALSMTWSCSPLTSSKFrRNAVNRYSGMAFASVKSTEGLGNLPKVVLTSPHGSEAELYLFGACVTSWKVDSKDLLFVRPDAVFNGQKPISGGIPHCFPQFGPGPIQQHGFGRNMNWSLVSSESVKEKPVVTVELRDGPYSRAMWDYSFHALYKITLDKKTLSTELTVKNTDNKPFSFTTALHTYFSASVTGASVNGLKGCKTLNKVPDPTNPVEGKEERDVVTFPGFVDCVYLDAPNELHLDNGLGDKISIKNTNWSDAVLWNPHLTMEQSYKDFVCVENAKIGTVQLEPEQSWTAVQHLTVA	At5g66530	XP_004232421.1	7	86	7	18.953	0.122219	5	3	8	3.5	minor CHO metabolism.others	Cp	29	4	Cp	Cp	Cp	Cp	94	plastid stroma	plastid	plastid
Solyc02g091340	SOS4	Pyridoxal kinase isoform 1, pyridoxal kinase (Salt overly sensitive 4)	MARPPILALAIPSDTGRVLSIQSHTVQGYVGNKSAVFPLQLLGYDVDPINSVQFSNHTGYPTFKGQVLNGEQLWELIEGLEANGLLYYTHLLTGYIGSVSFLNTVLKVVDKLRSVNPKLKFVCDPVMGDEGKLYVPPELVTVYREKVVPVASMLTPNQFEAEQLTGSRITSEKDGQEACNILHAAGPSKVVITSINIDGTLLLIGSHQKEKGQSPEQFKIVIPKIPAYFTGTGDLTTALLLGWSNKYPDDLDKAAELAVSSVQALLLRTLADYQKVGYDCQSSSLEIRLIQSLDDIRNPEVKYRAKRYN	At5g37850	XP_004231999.1	1	5	1	0.52	0.00335323	3	2	5	3.5	minor CHO metabolism.others	-	-	4	-	possibly ER	Cp	C	69.14	-	-	-
Solyc07g062070	RBSK	Ribokinase (AHRD V1 ***- C5RCK9_WEIPA); contains Interpro domain(s) IPR011611 Carbohydrate/purine kinase	MKGLATPLQSKYWHPTAQNNLKNPESFNLYSHPVQFNGKNNNPISRKVKPISCFASENQNQPILKESKPPLVVVGSANADIYVEIDRLPKEGETISAKTGQTLAGGKGANQAVCGGKLDYPTFFIGQVGEDAHGRLITEALESGGVCVNADHLTTVANAPTGNAVVMLQSDGENSIIIVGGANMSCWPEELSYEDLEIVRSAGIVLLQREIPDFVNIQVAKAARNAGVPVILDAGGADSPIPLELLRCVEIFSPNETELARITKMPTGNFEQISNAVEQCYDMGVNQVLVKLGANGSALFTKGEEPLRQPIIKAAKVIDTTGAGDTFTAAFAVALVEGKSKEECLRFAAAAASLCVQVKGAIPSMPEKRAVFNLLQSA	At1g17160	XP_004244302.1	3	5	3	0.585	0.00377238	3	3	6	3.5	minor CHO metabolism.others	Cp	74	5	Cp	possibly M	Cp	Cp	80.6	plastid stroma	plastid	plastid
Solyc11g042940	FGGY	Carbohydrate kinase FGGY (AHRD V1 ***- B7KH14_CYAP7); contains Interpro domain(s) IPR000577 Carbohydrate kinase, FGGY	MASSILSSACSCVDFRSWRKLSSRMLECGVSGKGRNPIFTNDFEIGKKLYLGMDFGTSGARYSLIDGDGNIHAEGKREYPLYMKEEKMDWIQSWKDTLFLLLDDVPVSLRKVVASIAIDGTSATTIIIDSRSEEPLSRAFLYNESCPDSLPLVKSIAPAKHTVCSGSSTLCKLVSWWNSYPSSKESAVLLHQADWLLWLLHGKLGVSDYNNALKVGYDPEMDSYPPWLLSQPYSHLLPSVHDPGTKIGCMKEDIRTQFGYPKDCLICTGTTDSIAAFLAARATQPGKAVCFVYLFVMI	At2g21370	XP_004250720.1	6	13	6	1.448	0.00933745	4	3	7	3.7	minor CHO metabolism.sugar kinases	Cp	11	3	-	Cp	Cp	C	52	plastid	plastid	-
Solyc11g042950	FGGY	Carbohydrate kinase FGGY IPR000577 Carbohydrate kinase, FGGY	MEPRLHPRPESDVEYLHGILESIARIEAKGYKLLKDLGATPVEEVITSGGGSKNQKWIKIRERVLGLPVCKADQTEAAYGAALLAMKGAISD	At2g21370	XP_010313065.1	2	4	2	3.642	0.0234855	3	3	6	3.7	minor CHO metabolism.sugar kinases	-	-	2	-	-	Cp	C	50.24	plastid	plastid	-
Solyc07g007930	-	Alkaline alpha galactosidase 2 (AHRD V1 **-- Q575Z7_MAIZE); contains Interpro domain(s) IPR008811 Raffinose synthase	MQLSFSRPKSPMMFDLISISSHHPNSIINTINRPIQNPKIPSFFSSTTTHFSYSFNKYSNPLQFSVSSPTTSVLAHKGSEVEFEKGLEEEEAAAKTVVDAAMTITPAIRISDRKLMVKDRTILTNVPDNVLTTPGAASGPLEGVFLGAEFDQDNNRHVVPLGKLQDVRFLSCFRFKLWWMAQKMGDKGSEIPMETQFLLVETTDGSHLGSNDNKNDDNIVYAVFLPLIEGSFRAVLQGNAEDELELCLESGDKDTVGSAFNQAVYIHAGSDPFIVITEAIRAVKLHLKTFRQRHEKKLPKIVDYFGWCTWDAFYQEVTQEGVEAGLKSLTAGGIPPKFIIIDDGWQSVGGDPEVDKPLMRLTGLKENEKFQKKEDPTLGIKNIVNIAKEKYGLNYVYVW…	At5g20250	XP_004242758.2	15	53	15	3.642	0.0234855	5	3	8	3.1.2.2	minor CHO metabolism.raffinose family.raffinose synthases.putative	Cp	74	2	Cp	-	Cp	C	46.7	plastid stroma	plastid	-
Solyc10g005400	Miox	Myo-inositol oxygenase (AHRD V1 **** B9XK04_9BACT); contains Interpro domain(s) IPR007828 Protein of unknown function DUF706	MAIVQALFPSQYLCMNKTKNNTQIGSKRSIQVSCRSSNQEDLLSRRQTSYNHSDEFGLQVEVEEKKVASFNGNEGVVFEVSNINAFGQSFRDYNAKSERQKSVEEFYRVQHINQTYDYVTKMRKEYGKLNKIEMSIWDCCELLNDVVDDSDPDLDEPQIEHLLQTAEAIRKDYPNEDWLHLTGLIHDLGKVLLHPSFGELPQWAVVGDTFPLGCAFDESIVHHKYFKENQDINNMIYNTKNGVYEEGCGLNKVVMSWGHDDYMYLVAKENGTTLPYAALFVIRYHSFYALHKSGAYKHLMNEEDKENIKWLNIFNKYDLYSKSSVRIDVENVKPYYLSLIQKYFPKILRW	At1g14520	XP_004248391.1	6	21	6	2.415	0.0155732	5	3	8	3.4.4	minor CHO metabolism.myo-inositol.myo inositol oxygenases	Cp	35	2	Cp	Cp	Cp	C	99.9	-	-	-
Solyc02g069010	IMPL	Inositol monophosphatase family protein (AHRD V1 **** D7KK98_ARALY); contains Interpro domain(s) IPR000760 Inositol monophosphatase	MGRCLLSSTISSLRICQLPRIRLPVFPKSRSTNSQYGFCTSLSTGGGFCTKAALSEVGIKKEYSKVAADSTGSIPSSELLKVVEAAAKTGAQVVMDAVNKPRNVTYKGLTDLVTDTDKNSEFAILEVVRKNFPNADHLILGEEGGIIGDSSSDYLWCIDPLDGTTNFAHGYPSFAVSVGVLFRGKPAAAAVVEFVGGPMCWNTRIFSAAAGKGAFANGEKIHVSRTDKVEQSLLVTGFGYEHDDPWATNMELFKEFTDVSRGVRRLGAAAVDMCHVALGIAEAYWEYRLKPWDMAAGVLIVEEAGGTVSCMDGGSFSVFDRSVLVSNGLLHAKLLEKIGPATENLKSKGIDFSVWFKPENYHTEV	At1g31190	XP_004233230.1	6	58	6	4.179	0.0269484	5	3	8	3.4.5	minor CHO metabolism.myo-inositol.inositol phosphatase	M	111	5	Cp	-	Cp	C	86.5	plastid stroma	plastid	plastid
Solyc01g109930	IMPL	Inositol monophosphatase family protein (AHRD V1 **** D7MGB6_ARALY); contains Interpro domain(s) IPR011809 Histidinol-phosphate phosphatase, putative, inositol monophosphatase	MQMLSQSHFLSLYPRNSSPLSSSFSAFSGGCNTRKIVSGSLAFQHSGIHSFPISHGIKLASPVMTSNCVLPSNQAQIVDFGVEDSELGKFAAVGNKIADAAGEVIRKYFRKSFDILDKEDLSPVTIADQAAEESMVKIIQENFPSHAIYGEEKGWRCQEETAEYVWVLDPIDGTKSFITGKPVFGTLIALLYKGKPILGVIDQPVLRERWIGLSGRRTTLNGQEISTRNCSSLSKAYMYTTSPHLFEGDAEIAFARVRSKVKVPLYGCDCYAYALLASGFVDLVVESGLKPYDFLSLVPVIEGAGGTITDWKGQHFNWKASAGSPATSFNVVAAGDKEVHQEALDALQWR	At4g39120	XP_004230915.1	5	21	5	2.162	0.0139417	5	3	8	3.4.5	minor CHO metabolism.myo-inositol.inositol phosphatase	Cp	83	2	Cp	Cp	Cp	C	58.5	plastid	plastid	-
Solyc08g014480	-	Lactase-like protein IPR006103 Glycoside hydrolase family 2, TIM barrel	MSSLTSQMVLPSSNGYKAWEDPYFFKWRKRDSHVPLHCHESVEGSLRYWNERNKVDLLVSKSAVWDDDAVSKALDCAAYWVKDLPFVKSLSGIWKFWLSPGPTNVPLNFYDSSFQDSSWETIPVPSNWQMHGHDRPIYTNTIYPFAFNPPKVPDDNPTGCYRTYFFLPEEWEGRRIFLHFEAVDSAFYAWVNGVPVGYSQDSRLPAEFEITDFCHPCGSGEGNCLAVQVMRWSDGSYLEDQNADHWWLSGIHRDVLLLAKPKTFIADYFFRTNIAEDFSYADIEVEVRIDNSLDNNDIADFTIEASLYDSGNWLSHSNADHVDLLSTNIAHLELVLSSDPCVGFKGYMLVGKVQAPKLWSAEQPNLYTLVITLKDASGNLVDCESCQVGMRKISKAPKE…	At3g54440	XP_004244771.1	9	28	9	0.66	0.00425602	5	3	8	26.3	misc.gluco-, galacto- and mannosidases	-	-	3	-	-	Cp	Cp	99.71	-	cytosol	-
A Proteins were identified by acetone preparations and/or the gel method. For emPAI and Mol% calculations, only the data from the acetone prepartions were used. Proteins identified solely by the gel method have data for the number of peptides, PSMs and unique peptides.
B Names of tomato proteins were based on the literature, NCBI annotation (identified in BlastP searches), and/or SolyGenomics descriptor. In a small number of cases, tomato protein names were assigned based on NCBI annotations and the Arabidopsis homolog.
C Some Sol Genomics descriptors were updated when NCBI annotations and Arabidopsis gene annotations were aligned.
D Target P's subcellular locations are: chloroplast (Cp), mitochondria (M), secretory (S), and no predicted location is indicated by a dash (-).
E ChloroP was used to predict the presence of a chloroplast transit peptide (Y) and the lack of a predicted transit peptide is indicated with a dash (-).
F Predotar's predicted subcellular locations were: chloroplast/plastid (Cp),endoplasmic reticulum (ER) or mitochondrion (M). For proteins with localization predictions that were less clear, Predotar provided categorized of possibly Cp, M and ER. Proteins with unresolved locations or that did not have a homolog detected by Predotar are indicated with a dash (-).
G WoLF PSORT's and YLoc's predicted subcellular locations were: chloroplast/plastid (Cp), cytosol (C), cytoskeleton (Cy), endoplasmic reticulum (ER), extracellular (EX), golgi apparatus (G), mitochondrion (M), nucleus (N), peroxisomes (P), plasma membrance (PM), and vacuole (V). Proteins with no chloroplast location in WoLF PSORT are indicated by not Cp.The number of proteins predicted to be in t…

## Sheet: Table S7F. C1 metabolism
Table S7F. C1 metabolism.
Gene and protein descriptors						ProteomicsA					Times detected			Bin codes		Algorithms								Databases
Tomato Gene ID	Gene nameB	DescriptionC	Protein Sequence	Arabidopis homolog	Tomato proteinB NCBI accession	Peptides	PSMs	Unique Peptides	emPAI	Mol%	Acetone samples	Gel samples	Total	Bincode	Name	TargetP D ver.1	Transit peptide length	TargetP (reliability class)	ChloroP E	Predotar F	WoLF PSORT G	YLoc G	YLoc % Confidence	PPDB	SUBA4	plprot
Solyc03g113590	5FCL	5-formyltetrahydrofolate cyclo-ligase (AHRD V1 **** B9I331_POPTR); contains Interpro domain(s) IPR002698 5-formyltetrahydrofolate cyclo-ligase	MAIPWAVSLSTSRFFPTRSAILrRNAQTSPCSATATMSTAGEQNTSDTAHLDTIFKQKKALRLVVKRDLKSMDPTLRSEEDEAIQRIVMEAPWFKACKGLCAYISCSALREVDTSRILSHILSSHSEMRKKLFVPRVEDRNRNMRMLNISSTEDLIANSMNILEPAPLDAEGNEREDVLFANEPVDLLILPGLAFDKAGrRNALGRGGGYYDTFLSRYQELAEKRNWKQPLKVALSYSVQIVDEGTIPLTPNDVLVDALVSPSGVIPISPAALEFCQ	At5g13050	NP_001234731.1	3	13	3	2.594	0.0167275	4	3	7	25.4	C1-metabolism.5-formyltetrahydrofolate cyclo-ligase	Cp	30	4	Cp	Cp	Cp	Cp	93.2	-	plastid	-
Solyc04g071700	-	5-formyltetrahydrofolate cyclo-ligase family protein (AHRD V1 ***- D7KTW5_ARALY); contains Interpro domain(s) IPR002698 5-formyltetrahydrofolate cyclo-ligase	MEVHVIRICSAFPFASIAKLSLHPSKSNFAISLSSLNFSDGSRLSFKVESQKRNDVVFDEAAYEAERHRLDAEARKSMAETSEIETQNQQDPKAWKWVIRKRVWDLMEAKNIAQFPRPVHHRIPNFVGASLAADKLSELEEFKVAKCVKVNPDTPQKQVRFLTLNGGKQLLTPQPRLRTGFFSVLEESMLSAGTIKEACTSAGVAKYGRPIGLEEKIKVDFIVLGSVAVNPMTGARLGKGEGFAELEYGMLRYMGAIDDSTPVVTSVHDEQLVDDIPIDKLLIHDVPVDIICTPTRVIFTNTSIPKPQGIYWEKLSPEKLSQIRILRQLKSKIEQETGQKLPTGPSEKLPPTAQRRR	At1g76730	XP_004237811.1	8	28	8	1.721	0.0110979	5	2	7	25.4	C1-metabolism.5-formyltetrahydrofolate cyclo-ligase	Cp	57	5	Cp	Cp	Cp	Cp	75.4	plastid stroma	mitochondrion	-
Solyc02g086880	FNADH1	FNADH1-Formate dehydrogenase IPR006140 NAD-isomer specific 2-hydroxyacid dehydrogenase, NADNA-binding	MAMRRVASTAARAIASPSSLVFTRELQASPGPKKIVGVFYKANEYAEMNPNFLGCAELGIREWLESKGHQYIVTPDKEGPDCELEKHIPDLHVLISTPFHPAYVTAERIKKAKNLQLLLTAGIGSNADHVDLKAAAAAGLTVAEVTGSNTVSVAEDELMRILILVRNFLPGHHQVINGEWNVAAIAHRAYDLEGKTVGTVGAGRIGRLLLQRLKPFNCNLLYHDRLKMDSELENQIGAKFEEDLDKMLSKCDIVVINTPLTEKTKGMFDKERIAKLKKGVLIVNRGAIMDTQAVVDACNSGHIAGYSGDVWYPQPAPKNADHLWRYMPNQAMTPHISGTTIDAQLRYAAGTKDMLDRYFKGEDFPAENYIVKDGELAPQYR	At5g14780	NP_001234857.1	5	20	5	1.069	0.00689347	5	3	8	25.1	C1-metabolism.formate dehydrogenase	M	33	3	-	M	Cp	M	99.12	-	mitochondrion	-
Solyc02g091560	SHM1	Serine hydroxymethyltransferase IPR001085 Serine hydroxymethyltransferase	MAMAIALRRLSATIDKPVKSLYNGGSIYYMSSLPNEAVYDKEKSGVAWPKQLPLEVVDPEIADIIEHEKARQWKGLELIPSENFTSVSVMQAVGSVMTNKYSEGYPGARYYGGNEYIDMAETLCQKRALEAFRLDPAKWGVNVQPLSGSPANFHVYTALLKPHERIMALDLPHGGHLSHGYQTDTKKISAVSIFFETMPYRLDESTGYIDYDQLEKSATLFRPKLIVAGASAYARLYDYDRIRKVCNKQKAILLADMAHISGLVAAGVIPSPFDYADVVTTTTHKSLRGPRGAMIFYRKGVKEVNKQGKEVFYDYEDKINQAVFPGLQGGPHNHTITGLAVALKQATTPEYRAYQEQVLSNSAKFAQALEEKGYELVSGGTDNHLVLVNMKNKGIDGSR…	At4g37930	XP_004231981.1	17	86	12	6.667	0.0429923	5	3	8	25.1	C1-metabolism.glycine hydroxymethyltransferase	-	-	5	-	M	Cp	M	65.95	-	mitochondrion	plastid
Solyc01g094280	FOLD4	FolD 4 bifunctional protein (AHRD V1 ***- B6TJF9_MAIZE); contains Interpro domain(s) IPR000672 Tetrahydrofolate dehydrogenase/cyclohydrolase	MASSPITMMKMKLNNCSPPSTAAAAARFLPLLGPHQIRFRSSVAPLYNPSFPRTIITRPTFSSSSIITAAMANEALVKVIDGKKVAKDVRDEINAEITRMKDSIGVVPGLAVILVGDRKDSATYVRNKKKACETAGIKSYEVCLPENSTEEEVLKYISDFNDDPMVHGILVQLPLPSHMDEEKILHAVCIEKDVDGFHPLNIGQLAMRGREPLFIPCTPKGCIELLHRYNVEIKGKKAVVignaRSNIVGMPAALLLQREDATVSIVHSRTTNPEEITREADIIIAAVGKPNMVRGSWIKPGAVIIDVGINPVEDATNPRGYRLVGDVCYEEAIKVASAITPVPGGVGPMTIAMLLSNTLLSAKRINNFK	At4g00620	XP_004229918.1	4	14	4	0.995	0.00641628	5	3	8	25.5	C1-metabolism.Methylenetetrahydrofolate dehydrogenase & Methenyltetrahydrofolate cyclohydrolase	Cp	68	1	Cp	Cp	Cp	M	98.6	plastid stroma	plastid	-
Solyc05g052920	FPGS1	Folylpolyglutamate synthase IPR001645 Folylpolyglutamate synthetase	MSQGEGKDEIKPTLSPYEEAMEALSSLITKRSRADKSNKGDKYELLFDYIKILELEEPIKKMKIIHVAGTKGKGSTCAFTESILRNCGFHTGLFTSPHLIDVRERFRLDGMDICEEKFLAYFWWCFDRFKERATDEVPMPTYFRFLALLAFKIFAAEQVDVAILEVGLGGKYDATNVVENPVVCGIASLGYNADHMEILGNTLGQIAGEKAGIFKRGVPAFTVPQPDEAMLVLEEKASELDVHLEVAAPLDASVLSGLHLGLEGEHQYIALAIALCSTWLQRTGHVEINYLKEMTHLPEQFVKGLATAALQGRAQIVPDQLIESESSGDLVFYLDGAHSPESMDVCAKWFSLAIKGDYKQHNSYASNHGHNELGPSHDSVEISHHEASKKSSTQFLLFN…	At5g05980	NP_001305730.1	1	1	1	0.105	0.000677094	1	0	1	25.8	C1-metabolism.tetrahydrofolate synthase	-	-	1	-	-	Cp	C	98.98	plastid	cytosol	-
Solyc01g103100	PTALR	NADPH-dependent pterin aldehyde reductase	MAIAGTTPSSPFLGHVPFHIGKSSFAQFTHHSLFRGSKTTVKVLLPLGKFTSIWFPQSQRFRQRSRIHATGNPSMRSAGGAIRTLLITGVSRGLGKALALELAKRGHYIIGCARSQDKLNAFQTELASSTNPPSENKHLLMSVDVSLNSSVEEFARAVMEKKGVPDIIVNCAGTINRNNKLWEVPAEEFDSVIDTNLKGTANVLRYFIPLMLEKKQGVIVNMSSGWGRSGAAQVAPYCASKWAIEGLTASVAKELPPGMAAVALNPGVIYTDMLQSCFGNSASLYQTPESWAPKAANMILNLTMADNGASLSV	At1g10310	XP_004230419.1	6	27	6	1.512	0.00975016	5	3	8	26.22	misc.short chain dehydrogenase/reductase (SDR)	Cp	91	2	Cp	Cp	Cp	Cp	99.6	plastid stroma	-	-
A Proteins were identified by acetone preparations and/or the gel method. For emPAI and Mol% calculations, only the data from the acetone preparations were used. Proteins identified solely by the gel method have data for the number of peptides, PSMs and unique peptides.
B Names of tomato proteins were based on the literature, NCBI annotation (identified in BlastP searches), and/or SolyGenomics descriptor. In a small number of cases, tomato protein names were assigned based on NCBI annotations and the Arabidopsis homolog.
C Some Sol Genomics descriptors were updated when NCBI annotations and Arabidopsis gene annotations were aligned.
D Target P's subcellular locations are: chloroplast (Cp), mitochondria (M), secretory (S), and no predicted location is indicated by a dash (-).
E ChloroP was used to predict the presence of a chloroplast transit peptide (Y) and the lack of a predicted transit peptide is indicated with a dash (-).
F Predotar's predicted subcellular locations were: chloroplast/plastid (Cp),endoplasmic reticulum (ER) or mitochondrion (M). For proteins with localization predictions that were less clear, Predotar provided categorized of possibly Cp, M and ER. Proteins with unresolved locations or that did not have a homolog detected by Predotar are indicated with a dash (-).
G WoLF PSORT's and YLoc's predicted subcellular locations were: chloroplast/plastid (Cp), cytosol (C), cytoskeleton (Cy), endoplasmic reticulum (ER), extracellular (EX), golgi apparatus (G), mitochondrion (M), nucleus (N), peroxisomes (P), plasma membrance (PM), and vacuole (V). Proteins with no chloroplast location in WoLF PSORT are indicated by not Cp.The number of proteins predicted to be in t…

## Sheet: Table S7G.Glycol-gluconeogen
Table S7G . Glycolysis and gluconeogenesis
Gene and protein descriptors						ProteomicsA					Times detected			Bin codes		Algorithms								Databases
Tomato Gene ID	Gene nameB	DescriptionC	Protein Sequence	Arabidopis homolog	Tomato proteinB NCBI accession	Peptides	PSMs	Unique Peptides	emPAI	Mol%	Acetone samples	Gel samples	Total	Bincode	Name	TargetP D ver.1	Transit peptide length	TargetP (reliability class)	ChloroP E	Predotar F	WoLF PSORT G	YLoc G	YLoc % Confidence	PPDB	SUBA4	plprot
Solyc01g080460	PPDK	Pyruvate phosphate dikinase (AHRD V1 ***- Q84N32_SORBI); contains Interpro domain(s) IPR010121 Pyruvate, phosphate dikinase	MSSTMKGLLLKPNTNNMYMTKLLKHKYAEEQFLAKYSSFGIHMNCSKWSSKVIRCHQQEPNGFSNSPVTPIRKQTPPPQAILSPVSETTSTAKKRVYTFGKGRSEGNKGMKSLLGGKGANLAEMAsignalSVPPGLTISTEACQEYQIAKKLPQGLWEEILQGLEVVEKDMGAFLGNPSKPLLLSVRSGAAISMPGMMDTVLNLGLNDEVVTGLAAKSGERFAYDSYRRFLDMFGDVVMGISHSLFAEKLEKLKDAKGVKLDTELTASDLKQLVEQYKNVYVEAKGEKFPSDPKRQLELAIKAVFDSWDSPRANKYRSINQITGLKGTAVNIQCMVFGNMGNTSGTGVLFTRNPSTGEKKLYGEFLINAQGEDVVAGIRTPQDLETMKECMPEAYKEL…	At4g15530	XP_010322950.1	22	77	22	3.642	0.0234855	5	3	8	6.5	gluconeogenesis / glyoxylate cycle.pyruvate dikinase	-	-	3	-	possibly M	Cp	Cp	99.6	plastid stroma	plastid cytosol	plastid
Solyc08g013840	SGPP	Broad-range sugar phosphate phosphatase , SGPP; HAD-superfamily hydrolase subfamily IA variant 3 (AHRD V1 **-- B2IYD2_NOSP7); contains Interpro domain(s) IPR005834 Haloacid dehalogese-like hydrolase	MSALVSLCSVPLYVQNKQFYSTINFSKIATVVPQMSLSSSIFNQHESKCLLPVDAPLKAILFDIDGTLCDSDPIHYYAFREMLQEIGFNGGAPISEEFFVKNISGMHNDELCHVLFLDWEFERAVKFMDDKEDMFRRIASEQLKPLNGLEEVCKWIEDRGLKRAAVTNAPRPNAELIISMLGLSDFFELLIIGSECERAKPFPDPYLKALQELGVSPKHAFVFEDSISGIKAGVAAGMPVVGLGLRNPEKLLSEAGATFVIKDFNDSKLWTALEELEPEIHA	At2g38740	XP_004244740.1	3	4	3	0.874	0.00563601	4	2	6	35.1	not assigned.no ontology	Cp	33	5	Cp	-	not Cp	Cp	40.8	-	-	-
Solyc03g114500	ENO1	Enolase (AHRD V1 ***- A9P745_HELAN); contains Interpro domain(s) IPR000941 Enolase	MALAPAQLSKTFFSTKPTSQTPLFSLPATQKIQSRRLSSTVRCSVAVAPSATASKASAKVKSVKARQIIDSRGNPTVEVDLVTGDDLLYRSAVPSGASTGIYEALELRDGDKSLYGGKGVLNAVKNINEYLGPKLVGVDVRNQTDVDAVMLEIDGTPNKSKLGANAILGVSLSVCRAGAGAKAVPLYKHIQEISGTKELVMPVPAFNVINGGSHAGNNLAMQEFMILPVGAPTFAEALRMGSEVYHTLKGIIKAKYGQDACNVGDEGGFAPNVQDNREGLVLLMDAIEKAGYTGKIKIGMDVAASEFLTKDAKYDLNFKKQPNDGAHVLSAQSLCELYKEFVKDFPIVSIEDPFDQDDWSSWASLQSSVDIQLVGDDLLVTNPKRIAEAIQKKACNALL…	At1g74030	XP_004236093.1	7	11	7	1.096	0.00706758	4	1	5	4.1.13	glycolysis.cytosolic branch.enolase	Cp	42	1	Cp	Cp	Cp	C	85.7	plastid stroma	plastid	-
Solyc04g076090	PGI1	Glucose-6-phosphate isomerase 2	MASSSLSSIYSPSSSFKSEVKSIHKITSSQLGSIYLPNKSRFHVHAVAREVSASLSAGNNDVVHKLKKENVGLEKNPNALWKRYVEWLYQHKELGLYLDISRVGFSDGFLEEMEPRLQKAFKDMVDLEKGAIANPDEGRMVGHYWLRSPHLAPNSFLRLQIENTLEAVCEFANDVVSGKVKTPSGGRFTQILSVGIGGSALGPQFVAEALAPDNPPLKIRFIDNTDPAGINADHQIAQLGPELASTLVIVISKSGGTPETRNGLLEVQKAFREAGLIFAKQGVAITQENSLLDNTARIEGWLARFPMFDWVGGRTSEMSAVGLLPAALQGIDIREMLAGAALMDEANRTTVVRDNPAALLALCWYWATDGVGSKDMVVLPYKDSLLLFSRYLQQLVMES…	At4g24620	NP_001234583.2	26	146	26	9	0.0580367	5	3	8	4.2.3	glycolysis.plastid branch.glucose-6-phosphate isomerase	Cp	52	2	Cp	Cp	Cp	C	99.6	plastid stroma	plastid	plastid
Solyc05g014470	GAPC-2 (cytosol)	Glyceraldehyde 3-phosphate dehydrogenase IPR000173 Glyceraldehyde 3-phosphate dehydrogenase	MANGKIKIGINGFGRIGRLVARVALQRDDVELVAVNDPFISTDYMTYMFKYDSVHGQWKHHELKVKDEKTLLFGEKAVTVFGIRNPEDIPWGEAGADFVVESTGVFTDKDKAAAHLKGGAKKVVISAPSKDAPMFVVGVNENEYKPELDIVSSCTTNCLAPLAKVINDRFGIVEGLMTTVHAMTATQKTVDGPSMKDWRGGRAASFNIIPSSTGAAKAVGKVLPQLNGKLTGMAFRVPTADVSVVDLTVRLEKEASYEDIKAAIKEESEGKLKGILGYTEDDVVSTDFVGDSRSSIFDAKAGIALSKNFVKVVSWYDNEWGYSSRVIDLICHMAKA	At1g13440	NP_001266254.2	6	10	3	1.254	0.00808644	2	3	5	4.1.8	glycolysis.cytosolic branch.glyceraldehyde 3-phosphate dehydrogenase (GAP-NADH)	-	-	5	-	possibly M	Cp	M	49.98	-	nucleus cytosol	-
Solyc06g071920	GAPC-1 (cytosol)	Glyceraldehyde-3-phosphate dehydrogenase IPR000173 Glyceraldehyde 3-phosphate dehydrogenase	MGKIKIGINGFGRIGRLVARVALQRDDVELVAVNDPFITVEYMTYMFKYDSVHGQWKNNELKVKDEKTLLFGEKPVTVFGIRNPEEIPWAEAGAEYIVESTGVFTDKDKAAAHLKGGAKKVVISAPSKDAPMFVVGVNEKEYKPDLNIVSSCTTNCLAPLAKVIHDRFGIVEGLMTTVHSITATQKTVDGPSAKDWRGGRAASFNIIPSSTGAAKAVGKVLPSLNGKLTGMSFRVPTVDVSVVDLTVRLEKEATYDEIKAAIKEESEGKLKGILGYTEDDVVSTDFLGDNRSSIFDAKAGIALSKNFVKLVSWYDNEMGYSTRVVDLIKHMASVQ	At3g04120	XP_004241503.1	6	10	1	1.154	0.00744159	3	0	3	4.1.8	glycolysis.cytosolic branch.glyceraldehyde 3-phosphate dehydrogenase (GAP-NADH)	-	-	5	-	possibly M	not Cp	M	74.96	-	nucleus cytosol	-
Solyc10g005510	GAPCp2	Glyceraldehyde-3-phosphate dehydrogenaseof Plastid 2	MAFSSLLKPAASFVRPSHRSQVSCAGLHHSSNSVKLQSSIFGDAVTILQSSSLQKSGACSIQPIRATATELPPTVPRSQTGGKTRVGINGFGRIGRLVLRIATFRDDIEVVAVNDPFIDAKYMAYMLKYDSTHGVYSGSISVLDDSTLEINGKQIKVSSKRDPADIPWGDLGADYVVESSGVFTTIDKASAHKKGGAKKVVISAPSADAPMFVVGVNEKTYKANMDVVSNASCTTNCLAPLAKVVHEEFGIVEGLMTTVHATTATQKTVDGPSMKDWRGGRGAGQNIIPSSTGAAKAVGKVLPELNGKLTGMAFRVPTPNVSVVDLTCRLDKSASYDDVKAAIKYASEGPLKGILGYTDEDVVSNDFVGDSRSSIFDAKAGIGLSKSFVKLVSWYDNEW…	At1g16300	XP_004248314.1	4	9	4	0.668	0.00430761	5	3	8	4.2.8	glycolysis.plastid branch.glyceraldehyde 3-phosphate dehydrogenase (GAP-NADH)	Cp	15	3	Cp	Cp	Cp	Cp	95.1	plastid stroma	-	-
Solyc03g093520	PFK4	Phosphofructokinase family protein (AHRD V1 ***- D7MV38_ARALY); contains Interpro domain(s) IPR012004 Pyrophosphate-dependent phosphofructokinase TP0108	MEFSLYNSSSLRFPQNDFLPLHNRSTLGSFHTFSIKKLASKSISTCRPLIWRRLPLVRRNAQTATESNASGDKHGEDDFIVEDVPHLTHFLPDLPSYTNPLKKSQAYAIVKKTFVSPEDMVAKEIIVQKDSPRGIHFRRAGPREKVFFTPEEVRACIVTCGGLCPGINTVIREIVCGLKNMYGVDDVLGIQGGYSGFYSKNTLNLTTKVVNDIHKRGGTFLQTSRGGHDTKKIVDNIQDRGINQVYIIGGDGTQKGAAAIYKEVEKRGIKVAVAGIPKTIDNDIAVIDKSFGFDTAVEEAQRAINAAHVEAESVQNGVGIVKLMGRYSGFIAMLATLGNRDVDCCLIPESPFYLEGPGGLYEYVEQQLKENRHVLIVLAEGAGQEYVAQSMQAFQEKDA…	At5g61580	XP_004235183.1	5	15	4	0.682	0.00439789	5	3	8	4.2.4	glycolysis.plastid branch.phosphofructokinase (PFK)	Cp	58	3	Cp	possibly Cp	Cp	C	98.9	plastid stroma	plastid	-
Solyc04g014270	PFK5	Phosphofructokinase family protein (AHRD V1 **** D7LE10_ARALY); contains Interpro domain(s) IPR012004 Pyrophosphate-dependent phosphofructokinase TP0108 [PREDICTED: ATP-dependent 6-phosphofructokinase 5, chloroplastic-like]	MESLSPAIGQKAIFPSTTGYTNADHDLFLDSVKVRTERNFNRACRRLRIRVQPKNAAAGVGGIDFSDPDWKLKYSREFEARFNIPHMTDVFPDAVSYPSTFCLKMRTPITEKFAEGYPSDEKWHGYINNNDRVLLKVINYSSPTSAGAECIDSNCSWVEQWVHRAGPREKIFFKPEEVKAAIVTCGGLCPGLNDVIRQIVITLEIYGVKKIVGIPFGYRGFSEKGLAEMPLSRKVVQNVHLSGGSLLGVSRGGPKVSDIVDSIQERGINMLFVLGGNGTHAGANAIHDECRKRRIKAAVVGVPKTIDNDIMLMDKTFGFDTAVEEAQRAINSAYIEAHSAYRGIGIVKLMGRSSGFIAMQASLASGQIDICLIPEVPFNLHGPHGVLRHLKYLLETKGS…	At2g22480	XP_004236699.1	6	13	1	0.823	0.00530713	5	2	7	4.2.4	glycolysis.plastid branch.phosphofructokinase (PFK)	-	-	4	-	Cp	Cp	C	99.4	plastid stroma	plastid	-
Solyc03g006870	PGM	Phosphoglucomutase (AHRD V1 **** C1MKX8_MICPS); contains Interpro domain(s) IPR016055 Alpha-D-phosphohexomutase, alpha/beta/alpha I, II and III	MAMESALASTRVSIPSLCSGITSSHHHHRSLSFLSFPKLCSFKYCFRTISTVPFVVSASSVSPSSPSTSVAQSQDLKIKSVPTKPIEGQKTGTSGLRKKVKVFMQDNYLANWIQALFNSLPLEDYKNGLLVLGGDGRYFNREAAQIIIKIAAGNGVGKILVGKDGILSTPAVSAVIRKREANGGFIMSASHNPGGPEYDWGIKFNYSSGQPAPESITDKIYGNTLSISEIKIADVPDVDLSQLGVTKYGNFSVEVVDPVADYLELMENVFDFSLIRSLVSRPDFRFVFDAMHAVTGAYAKPIFVDKLGASLDSIANGVPLEDFGHGHPDPNLTYAEDLVNILYGENGPDFGAASDGDGDRNMILGRSFFVTPSDSVAIIAANAQDAIPYFQSGPKGLAR…	At5g51820	XP_004234144.1	16	141	16	5.918	0.0381623	5	3	8	4.2.2	glycolysis.plastid branch.phosphoglucomutase (PGM)	Cp	57	1	Cp	Cp	Cp	Cp	85.1	plastid stroma	plastid	plastid
Solyc04g005030	-	Phosphoglucomutase/phosphomannomutase family protein (AHRD V1 **-* A3IPW6_9CHRO); contains Interpro domain(s) IPR016055 Alpha-D-phosphohexomutase, alpha/beta/alpha I, II and III	MAAISGKVVQHNLVAKCCQQDRELSTKYRLYYCTLSRRNLLPPVGGKLAWNGNSTMQLDALSKSKRGNVYCNAASSSTAIPSVEKSNFLKLQNGSDIRGVAIDGVEGEPLTLTETVTEAIAAGFSGWLLAKKKNVSSKCLRVSVGHDSRISAQKLQDAVSRGLARAGVEVIQYGLASTPAMFNSTLTENEEFSCPVDGSIMITGGLGKPDIKDILERAADIYKNIANENSKGAETAASLDVKRVDYMSVYASNLVAAVRKAAGSIEKPLEGFHIIVDAGNGAGGFFVGKVLEPLGAITSGSQFLEPDGLFPNHIPNPEDKTAMKAITKAVLDNRADLGIIFDTDVDRSAAVDSSGREFNRNRLIALMSAIVLEEHPGTTIVTDSVTSDGLTTFIEKKLG…	At5g17530	XP_025886311.1	11	27	11	1.683	0.0108529	5	3	8	4.2.2	glycolysis.plastid branch.phosphoglucomutase (PGM)	-	-	5	-	possibly Cp	Cp	C	74.5	plastid stroma	plastid	-
Solyc05g026490	-	Phosphoglucomutase/phosphomannomutase family protein (AHRD V1 **-* A3IPW6_9CHRO); contains Interpro domain(s) IPR016055 Alpha-D-phosphohexomutase, alpha/beta/alpha I, II and III	MASTLSSLQTINSSITNFPCVPIIKKPKLHISLTKTSISSVRVVCCSSSSSSATTYNEDEEMDKIRRLQNGSDVRGVALQGEKGRSVDLTPPAVEAIAESFGEWVIKRLNNKEKVVMVSLGKDPRISGNTLSVAVFSGLSRAGCMVFDMGLATTPACFMSTILPPCQYDASIMMTASHLPYTRNGLKFFTKKGGLTSVEVEEICSDAARKYANRFAKVSTTLSTRPTKVDFMSNYAKHLRDIIKERVNHPNHYETPLKGFQIIVNAGNGSGGFFTWDVLDKLGADTFGSLHLNPDGMFPNHIPNPEDKIAMSLTRAAVLENNADLGIVFDTDVDRSGVVDSEGNPINGDRLIALMSAIVLKEHPGTTIVTDARTSMALTKFITNKRGQHCLYRVGYRNV…	At1g70820	XP_004239330.1	20	129	20	10.788	0.0695666	5	3	8	4.2.2	glycolysis.plastid branch.phosphoglucomutase (PGM)	Cp	45	1	Cp	Cp	Cp	C	96.2	plastid stroma	plastid	-
Solyc03g114250	-	Phosphoglycerate mutase family protein (AHRD V1 **-- B6TTB7_MAIZE); contains Interpro domain(s) IPR013078 Phosphoglycerate mutase	MSKAFASNTLVPPWNSSEQPLIPSHSQFHFKPTTRRHLITSISIIMTPLLASDPFSPFPLPVSHARGLFQMPPFRLSNRYFLVRAGESEYESLGLINTNPVAKTSVDNGLSEKGKKQTVRAAFDLKEMRACDENCWIWPSITQRAYQAAEIIAAVNGVNRSHIVPEYSFLDARGLGAYEGKSLDTLSQVYESDSLSPNIKPPPTDDGTPNESVSDVFVRVTQVMSILETQYSEDTVIIVSPDSDNLTVLQAGLTGLDLRRHRDLSFGPGEVRFVDASSIPTYKQPASTVYKCLNPPSCT	At5g62840	XP_004236110.1	5	18	5	2.162	0.0139417	5	3	8	35.1	not assigned.no ontology	Cp	84	2	Cp	-	Cp	Cp	92.5	-	-	-
Solyc04g015330	-	Phosphoglycerate mutase family protein (AHRD V1 **-- B6TTB7_MAIZE); contains Interpro domain(s) IPR013078 Phosphoglycerate mutase	MNVVVASLVEPLQVPYNYNSCKKSQIKKSPKCVMVASSSSGVGSLVIETNQDQQQISTSTQTPTTTLSSVAARRLILLRHAKSSWENRSIRNADHDRPLSRSGQLDAIKVSQNLLKLGWIPQLILSSDALRTRETLKIMQEQVQAFLEAEVHFISSFYSVAAMDGQTAEHLRQAICNYSRDEISTVMCMGHNRGWEEAASVLSGATVELKTCNGALLEATGKSWEEAFSLAGPGGWKLQGLVKPDTAV	At3g52155	XP_004236635.1	3	10	3	1.31	0.00844756	5	3	8	35.2	not assigned.unknown	-	-	5	Cp	-	Cp	Cp	45.5	plastid	plastid	-
Solyc04g076830	-	Phosphoglycerate mutase family protein	MAKLIYIYILTYSHQKRVNQQSKLRNSINKRIFLTDTHLIGLHFSHVTSSFISSVLRFSSPSLRVKATYRPSGMDVSGGQSVYPLHRCKTIHLVRHAQGIHNVEGEKDHSAYLSRHLFDAHLTPLGWQQVDNLRKHVQTSGISKRVELVITSPLLRCMQTAVGVFGGEDSTDGTDVPPLMVTDAGESNHPAISSLNCPPFIAVEGCREHLGVHWCDKRRSISEYKPLFPAIDFSLIESDDDVLWELDVREKIEDVASRGIEFFKWLWTRKEKEIAIVTHSGLLTHTLAKFGRDCHPDVKSEISKRFQNCELRTMVLVDRSMVGSDSSATNYPGKIPSGEDAPSDLACTTPDGLPN	AT1G58280	XP_010320238.1	1	1	1	0.155	0.00099952	1	0	1	'35.1'	'not assigned.annotated'	Cp		2	Cp	possibly Cp	Cp	C	41.1	-	plastid	-
Solyc08g081390	-	Phosphoglycerate mutase-like protein AT74 , NCBI	MSNLFSKIYPPSITINHQKLQQNSSTIRCCSNSNHDEHSStheNGWILNGFPEKNLVQHQHGIVKPPRPKRIILVRHGESEGNVDESVYTRVADPKVGLTEKGVIEAEECGRKMREMIEKNDGNDDWKVYFYVSPYKRGIETLRNLAKSFERSRIAGVREEPRLREQDFGNFQDREQMKIEKAVRARYGRFFYRFPNGESAADVYDRITGFRETLRSDIDIGRFEPPGQQSPNMNLVIVSHGLTLRVFLMRWYKWTVEQFEGLHNMTNGGMIVMERGYGGRYCLSMHHTKEELQKFGMTDEMLIDQEWQKISKYLSCKTKLVignaKLNIKQQGNLQQICSSRSENIENLQSSHRGIWCYKYSREGKTVHLILTKPAHKGQT	At3g05170	XP_004245577.1	3	6	3	0.624	0.00402388	5	0	5	4.1.12	glycolysis.cytosolic branch.phosphoglycerate mutase	Cp	28	2	-	possibly Cp	Cp	N	65.1	-	-	-
Solyc02g078240	-	Probable 2-carboxy-D-arabinitol-1-phosphatase	MMTSRVIFTIPYFSFPSISNKSPYPKLIPDTSAPICYAICCSTSTPGLPVTTEILRNDTPLTGGAFDFENATTSLTKRVLASPKKVTIVRHGLSSWNEESRVQGSSNLSILSEKGTMQAERCKMALSDIHFDQCFSSPISRAKTTAEIIWKGKEEPLVFLDSLKEAHLFFLEGMKNEDAKRIYPKEYTTWREDPSKFCVDGVYPLQKLWGRAHEAWEEILLTPGEHFLVVTHKSILRALICTALGLGPERFRSVDINNGGLCVFKFNKEGEAMLQSLNMTAHMYTNADHVYHY	At5g22620	XP_004232874.1	2	4	2	0.468	0.00301791	4	1	5	4.3.12	glycolysis.unclear/dually targeted.phosphoglycerate mutase	-	-	5	Cp	ER	Cp	C	81.5	plastid stroma	plastid	-
Solyc06g074510	-	Probable 2-carboxy-D-arabinitol-1-phosphatase	MYSIAASSFFSPKLPKNLPFHNPNRPLFAIVRSSSVAQEIDKSSEERTESLGLKGLEFPAIKGAKRVVLVRHGQSTWNAEGRIQGSSDFSVLTSKGESQAETSRQMLIDDSFDICFSSPLRRSKRTAEIIWGAREEEIITDSDMREIDLYSFQGLLKHEGKAKYGEAFRQWQIDAPNFIIDGHYPVRELWARAKSCWDKILVHESKSVLVVAHNAVNQALVATAIGLGTEYFRILLQSNCGVSVLDFTPQPEGGTPSICLNRLNQTPGSPVAGGSSAGRKTSKRIVLVCHGVSESDLESSMPYTGNGPLNMLGNIQAQKIAELLLDLKVNTVVSGTKIASVETADTITKVQEAADCLGADCIPRYVETKQIPDLDVESILTQSKKDAPGLQNLSSGWLN…	At5g22620	XP_004241306.1	16	62	16	3.924	0.025304	5	3	8	4.3.12	glycolysis.unclear/dually targeted.phosphoglycerate mutase	Cp	32	2	Cp	Cp	Cp	C	77.8	plastid stroma	plastid	-
Solyc09g082970	PKP1	Pyruvate kinase subunit A (AHRD V1 **** B9HKC4_POPTR); contains Interpro domain(s) IPR001697 Pyruvate kinase	MSHAINFFVSSPSRSPASLTISRPSAFVSTGSLRVPVKKSLRSLVVKASAASDLDESQSSPVLVSENGSGGVLSSVTKEYGRNNAVASSADSSSIEVDTVTEAELKENGFRSTRRTKLICTIGPATCGFEQLEALAVEGMNVARINMCHGTRDWHRMVIERVRRLNEEKGFAVAIMMDTEGSEIHMGDLGGASSAKAEDGEIWNFTVRAFDPPLPERTITVNYDGFAEDVKVGDDLLVDGGMVRFEVIEKIGPDVKCLCTDPGLLLPRANLTFWRDGKLVRERNAMLPTISSKDWLDIDFGIAEGVDFIAVSFVKSAEVIKHLKSYIKARARDGDIAVIAKIESIDSLRNLEEIIQASDGAMVARGDLGAQIPLEQVPSEQQKIVQLCRQLNRPVIVAS…	At3g22960	XP_004247618.1	14	50	14	3.507	0.022615	5	3	8	4.2.14	glycolysis.plastid branch.pyruvate kinase (PK)	Cp	47	2	Cp	Cp	Cp	Cp	99.9	plastid stroma	plastid	plastid
Solyc03g007810	PKP2	Pyruvate kinase (AHRD V1 ***- A5BTB0_VITVI); contains Interpro domain(s) IPR001697 Pyruvate kinase	MAQVVATRSIQSSFSSPSHGSLQSQVEKLKPPSLASKVLGRNERSNSCRAVRVNMPQIIARRSTRAEPQVLPVSPEDVPKSEEQEQYLQAIQQLGDTSVGMWSKPTVRRKTKIVCTIGPSTNTREMIWKLAEAGMNVARMNMSHGNADHASHQKVIDLVKEYNAQSKDNVIAIMLDTKGPEVRSGDLPQPIMLKPGQEFTFTIQRGVGTADCVSVNYDDFVNDVEVGDMLLVDGGMMSLQVKSKTEESVKCEVIDGGELKSRRHLNVRGKSATLPSITEKDWDDIKFGVDNNIDFYAVSFVKDAAVVHELKNYLKSCGADIHVIVKIESADSIPNLHSIITASDGAMVARGDLGAELPIEEVPLLQEEIINICRSMGKAVIVATNMLESMIVHPTPTRA…	At5g52920	XP_004234211.1	12	46	9	4.484	0.0289152	5	3	8	4.2.14	glycolysis.plastid branch.pyruvate kinase (PK)	Cp	61	1	Cp	Cp	Cp	Cp	95.8	plastid stroma	plastid	plastid
Solyc08g077180	PKP3	Pyruvate kinase isozyme G (AHRD V1 **** Q53WS7_TOBAC); contains Interpro domain(s) IPR001697 Pyruvate kinase	MAALNLHTGGLHAALKSDVAVKSAASLDRLSSAKNIGDLFFSDLSFHRKRVNGLCQIVAVKSPNADHIRGANNNVHASYDDDDNSNFNLPLTSSSSPYSLGKESVYLNSPRKTKIVCTIGPSTSSKEMIWKLAEAGMNVARMNMSHGNADHASHQKTIDLVKEYNAQFENKVIAIMLDTKGPEVRSGDVPKPILLKEGQEFNFTIKRGVSTEDTVSVNYDDFINDVDSGDTLLVDGGMMSLVVKSKTSDVVKCEVIDGGELKSRRHLNVRGKSATLPSITEKDWDDIKFGVDNQVDFYAVSFVKDAKVVHELKDYLKSCNADIHVIVKIESADSIPNLHSILTASDGAMVARGDLGAELPIEEVPLLQEDIIRRCRSMQKPVIVATNMLESMINADHPT…	At1g32440	XP_004245876.1	11	41	8	2.981	0.019223	5	3	8	4.2.14	glycolysis.plastid branch.pyruvate kinase (PK)	-	-	4	-	possibly Cp	Cp	Cp	96.3	plastid stroma	plastid	-
Solyc10g005370	RP1	Pyruvate, phosphate dikinase regulatory protein 2 (AHRD V1 ***- PDRP2_ARATH); contains Interpro domain(s) IPR005177 Protein of unknown function DUF299	MICSSSLRVSGSGSGTRNSPSPPAISDNSDDSQSQVRRIKASPQLNRWSRARSIRSGRKLDRSAVSTELRDKSGSPVRSEPEIELPIGDSRSWSSDDEKEVNGGKPIFMVSDGTGWTAEHAVNAALGQFDYCLVDRVCPVNTHLFSGIDDVEKLMEIVKQAAKEGAMVVYTLAEPSMAQFAKQACEHWGVASSDILGPITEAIAGHLGVSPSGLSRWAPERQKSPLSEEYFRRIEAIEFTIKQDDGALPRNLHMADIVLTGVSRSGKTPLSIYLAQKGYKVANVPIVMNIDLPSTLFEVNPEKVFALTINPVVLQSIRRARAKTLGMDGQLKTNYCDMDYVKEELEYAGKIFAQNPVWPVIEVTSKAIEETAVIVLRLYHDRKNRCSMPRISKRY	At4g21210	XP_004248393.1	1	1	1	0.122	0.000786719	1	0	1	35.2	not assigned.unknown	Cp	50	1	Cp	Cp	Cp	Cp	63.6	plastid stroma	plastid	-
Solyc04g011510	pdTPI-1	Triosephosphate isomerase IPR000652 Triosephosphate isomerase	MRSYAGHDDLALIMMQNGTSEEIKKIVATLGQVPSQDVVEVVVSPPFVFLPLVKSELRSDFHVAAQNCWVKNGGAFTGEVSANMLVNLSIPWVILGHSERRAILGESNEFVGDKVAYALSQGLKVIACVGETLEQRESGSTMAVVAAQTKAIADRVKDWSNVVIAYEPVWAIGTGKVATPAQAQEVHAELRKWLQANVSAEVAASTRIIYGGSVSGANCKELAGQPDVDGFLVGGASLKPEFIDIIKAAEVKKSA	At3g55440	XP_004236746.1	4	9	3	3.217	0.0207449	5	3	8	4.1.7	glycolysis.cytosolic branch.triosephosphate isomerase (TPI)	-	-	2	-	-	Cp	C	82.16	-	cytosol	plastid
A Proteins were identified by acetone preparations and/or the gel method. For emPAI and Mol% calculations, only the data from the acetone preparations were used. Proteins identified solely by the gel method have data for the number of peptides, PSMs and unique peptides.
B Names of tomato proteins were based on the literature, NCBI annotation (identified in BlastP searches), and/or SolyGenomics descriptor. In a small number of cases, tomato protein names were assigned based on NCBI annotations and the Arabidopsis homolog.
C Some Sol Genomics descriptors were updated when NCBI annotations and Arabidopsis gene annotations were aligned.
D Target P's subcellular locations are: chloroplast (Cp), mitochondria (M), secretory (S), and no predicted location is indicated by a dash (-).
E ChloroP was used to predict the presence of a chloroplast transit peptide (Y) and the lack of a predicted transit peptide is indicated with a dash (-).
F Predotar's predicted subcellular locations were: chloroplast/plastid (Cp),endoplasmic reticulum (ER) or mitochondrion (M). For proteins with localization predictions that were less clear, Predotar provided categorized of possibly Cp, M and ER. Proteins with unresolved locations or that did not have a homolog detected by Predotar are indicated with a dash (-).
G WoLF PSORT's and YLoc's predicted subcellular locations were: chloroplast/plastid (Cp), cytosol (C), cytoskeleton (Cy), endoplasmic reticulum (ER), extracellular (EX), golgi apparatus (G), mitochondrion (M), nucleus (N), peroxisomes (P), plasma membrance (PM), and vacuole (V). Proteins with no chloroplast location in WoLF PSORT are indicated by not Cp.The number of proteins predicted to be in t…
										0.390368

## Sheet: Table S7H. Photorespiration
Table S7H . Photorespiration
Gene and protein descriptors						ProteomicsA					Times detected			Bin codes		Algorithms								Databases
Tomato Gene ID	Gene nameB	DescriptionC	Protein Sequence	Arabidopis homolog	Tomato proteinB NCBI accession	Peptides	PSMs	Unique Peptides	emPAI	Mol%	Acetone samples	Gel samples	Total	Bincode	Name	TargetP D ver.1	Transit peptide length	TargetP (reliability class)	ChloroP E	Predotar F	WoLF PSORT G	YLoc G	YLoc % Confidence	PPDB	SUBA4	plprot
Solyc03g120430	GLYK	Glycerate kinase (AHRD V1 **** C1DYY5_9CHLO)	MAGLNILSQTPSPWQLSASSTSSSISYSSRFPHFYDFNNNYNCGDSKCSTNFPLSGNPRPKRPTLSSQMQPHFSNSSGSECSWMQDKSASCDNFSPNGRKQGALNAASSKERALVSSVDDLYDFICSGPLISKIGLTPEKVAESIDEWIEYGLRLCRLFQLNQLSLNEAQKIRIYHYYIPVFLWCEQEISQHSSKFKEEEEIPPLVignaFSAPQGCGKTTLVFALEYLFKITGRKAATVSIDDFYLTAEEQAKLRDSNPGNLLLEFRGNAGSHDLPFSVETLTALSKLTKEGVKVKLPRYDKSAYSGRGDRADPSEWPEVEGPLPVILFEGWMLGFKPLPPEVVKAVDPQLETINKNLEAYYDAWHKYVKSWIVIKIQDPSYVYQWRLQAEIAMRADG…	At1g80380	XP_004235693.1	14	137	14	18.953	0.122219	5	3	8	1.2.7	PS.photorespiration.glycerate kinase	Cp	90	2	Cp	Cp	Cp	Cp	69.4	plastid stroma	plastid	-
Solyc08g007040	GDH1	Glycine cleavage system H protein 1 (AHRD V1 ***- B6UHJ7_MAIZE); contains Interpro domain(s) IPR017453 Glycine cleavage H-protein, subgroup	MALRMWASSTANALRVSSTVSRTNFSLSRCFSTVLEGLKYASSHEWVKHEGSVATIGITNADHAQNADHLGEVVFVDLPDSGTSVSHGSSFGAVESVKATSDINSPISGEIVEVNTKLSETPGLINSSPYEDGWMIKVKPSNPSELESLMGAKEYTKLCDEEEIH	At2g35370	NP_001333611.1	2	32	1	4.623	0.0298115	5	3	8	1.2.4.4	PS.photorespiration.glycerate kinase	M	31	3	Cp	M	Cp	M	99.9	-	mitochondrion	plastid
Solyc08g065220	GLDP1	Glycine dehydrogenase P protein (AHRD V1 **** Q6V9T1_ORYSJ); contains Interpro domain(s) IPR003437 Glycine cleavage system P-protein	MERARKLANRAILKRLVSQSKQSRSNEIPSPSSLYRPSRYVSSLSPYTFQARNSVKSFNTQQVRSISVEALKPSDTFPRRHNSATPEEQTKMAEFCGFQSLDALIDATVPQSIRSESMKLPKFDGGLTESQMIEHMQKLASKNKVFKSYIGMGYYNTYVPPVILRNLLENPAWYTQYTPYQAEISQGRLESLLNYQTMITDLTGLPMSNASLLDEGTAAAEAMAMCNNILKGKKKTFLIANNCHPQTIEICKTRADGFDLKVVTVDLKDIDYKSGDVCGVLVQYPGTEGEILDYGEFIKNAHAHGVKVVMASDLLALTMLKPPGELGADIVVGSAQRFGVPMGYGGPHAAFLATSQEYKRMMPGRIIGLSVDSTGKPALRMAMQTREQHIRRDKATSNI…	At4g33010	XP_004245101.1	20	100	20	5.31	0.0342416	5	3	8	1.2.4.1	PS.photorespiration.glycerate kinase	Cp	67	5	Cp	M	Cp	M	92.7	-	mitochondrion	plastid
Solyc07g056540	GLO1A	glycolate oxidase 1	MEEVTNVTEYQEIAKKKLPKMVYDYYASGAEDQWTLAENRFSRILFRPRILIDVSKIDMTTTVLGFKISMPIMIAPTAMQKMAHPEGEYATARAASAAGTIMTLSSWATSSVEEVASTGPGIRFFQLYVYKDRNVVAQLVRRAEKAGFKAIALTVDTPRLGRREADIKNRFVLPPFLTLKNFEGLDLGKMDQANDSGLASYVAGQIDRTLSWKDVQWLQTITSMPILVKGVITAEDARLAVQAGAAGIIVSNHGARQLDYVPATISALEEVVKGAQGRIPVFLDGGVRRGTDVFKALALGASGIFIGRPVVFSLAAEGEAGVKKVLQMLRDEFELTMALSGCRSLKEITRNHIVTEWDTPHAALPAPRL	At3g14420	NP_001294871.1	17	159	11	36.927	0.238124	5	3	8	1.2.2	PS.photorespiration.glycerate kinase	-	-	2	-	-	Cp	C	68.11	plastid peroxisome	peroxisome	plastid
Solyc10g007600	GLO1B	glycolate oxidase 1	MGEVTNVMEFEAIAKQKLPKMVYDYYASGAEDQWTLAENRFSRILFRPRILIDVSKIDLSTSVLGFNISMPIMIAPTAMQKMAHPDGEYAIARAASAAETIMTLSSWGTSSVEEVNSTGPGTRFFQLYVYKDRNVTIQLVRRAERAGFKAIALTVDTPRLGRREADIKNRFNLPPHLSLKNFEGLDIGKLNKAEDSGLASYVAGQVDRSLSWKDVQWLQSITSLPILVKGVLTAEDAKIAVQSGAAGIIVSNHGARQLDYVPATIMALEEVVKAVQGRIPVFLDGGVRRGTDVFKALALGASGVFIGRPIIWSLAADGEAGVKKALQMIRDEFELTMALSGCRSLKEITRNHVMTDWETPRASLPVPRL	At3g14420	NP_001334906.1	11	44	6	5.31	0.0342416	5	2	7	1.2.2	PS.photorespiration.glycerate kinase	-	-	2	-	-	Cp	C	91.1	plastid peroxisome	peroxisome	plastid
Solyc11g008620	PGLP	Phosphoglycolate phosphatase (AHRD V1 **-- C1FHY2_9CHLO); contains Interpro domain(s) IPR006349 2-phosphoglycolate phosphatase, eukaryotic	MLSIRVTATISSSSTLFFTNSKKISNKFSYISNPLKNSSKPIKWNCKNSRMESSKSSFVTKASAQPLTNPAELIDSVETFIFDCDGVIWKGDKLIDGVPETLDLLREKGKRLVFVTNNSTKSRKQYGKKFETLGLSVNEEEIFASSFAAAAYLKSIDFPKDKKVYVVGEDGILKELELAGIQYLGGPEDGDKKIELKPGYMMEQDKDVGAVVVGFDRYFNYHKIQYATLCIRENPGCLFIATNRDAVTHLTDAQEWAGGGSMVGAILGSTKREPLVVGKPSTFMMDYLADKFKIQKSQICMVGDRLDTDIVFGQNGGCKTLLVLSGVTSLSMLQDPSNSTQPDFYANKISDFLSIKAAAV	At5g36700	XP_004250073.1	11	85	11	12.111	0.078098	5	3	8	1.2.1	PS.photorespiration.glycerate kinase	Cp	63	1	Cp	Cp	Cp	C	72.4	plastid stroma	plastid	plastid
Solyc02g091560	SHM1	Serine hydroxymethyltransferase IPR001085 Serine hydroxymethyltransferase	MAMAIALRRLSATIDKPVKSLYNGGSIYYMSSLPNEAVYDKEKSGVAWPKQLPLEVVDPEIADIIEHEKARQWKGLELIPSENFTSVSVMQAVGSVMTNKYSEGYPGARYYGGNEYIDMAETLCQKRALEAFRLDPAKWGVNVQPLSGSPANFHVYTALLKPHERIMALDLPHGGHLSHGYQTDTKKISAVSIFFETMPYRLDESTGYIDYDQLEKSATLFRPKLIVAGASAYARLYDYDRIRKVCNKQKAILLADMAHISGLVAAGVIPSPFDYADVVTTTTHKSLRGPRGAMIFYRKGVKEVNKQGKEVFYDYEDKINQAVFPGLQGGPHNHTITGLAVALKQATTPEYRAYQEQVLSNSAKFAQALEEKGYELVSGGTDNHLVLVNMKNKGIDGSR…	At4g37930	XP_004231981.1	17	86	12	6.667	0.0429923	5	3	8	25.1	C1-metabolism.glycine hydroxymethyltransferase	-	-	5	-	M	Cp	M	65.95	-	mitochondrion	plastid
Solyc08g065490	SHM3	Serine hydroxymethyltransferase (AHRD V1 **** B9S1D7_RICCO); contains Interpro domain(s) IPR001085 Serine hydroxymethyltransferase	MEACCGAAVMSSLQQPVWVKGSAFPSKGVAGINVNSSRVKLCSVKPCRATPTEWSLITERPTSSAPEGAGSSFEDYGLHEADPDVRTIIDKEKQRQFRSLELIASENFTSRAVMEAVGSCLTNKYSEGLPGKRYYGGNEYIDELETLCQERALAAFSLDGKQWGVNVQPLSGSPANFAVYTAVLNPHDRIMGLDLPHGGHLSHGFMTPKRRVSGTSIYFESMPYRLDESTGILDYEMLEKTANLFRPKLIIAGASAYPRDFDYPRLRKIADAVGAFLMMDMAHISGLVAASVLANPFEYCDIVTTTTHKSLRGPRGGMIFFKKDPVLGMDLESAINNAVFPGLQGGPHNHTIGGLAVCLKHAKSPEFKVYQNQVVANCRALASRLMELGYKLVSGGSDN…	At4g32520	XP_004245112.1	10	36	4	2.162	0.0139417	5	3	8	1.2.5	PS.photorespiration.glycerate kinase	Cp	63	2	Cp	possibly Cp	Cp	Cp	90.3	stroma	plastid	-
Solyc12g095930	SHM3	Serine hydroxymethyltransferase (AHRD V1 ***- B9HDQ7_POPTR); contains Interpro domain(s) IPR001085 Serine hydroxymethyltransferase	MEACSRAAVMGSSLQQPVWVKGSAFPLKGEVKLNGVRLWFVKPCKASQLDGSLVSGRPPSSVSVPIPEMGGAGNNFVDYGLGEADPEVRGIIDKEKERQFRSLELIASENFTSRAVMEAVGSCLTNKYSEGLPGKRYYGGNEYIDELEILCQERALAAFNLDGKQWGVNVQPLSGSPANFEVYTAVLNPHDRIMGLDLPHGGHLSHGFMTPKRRVSGTSIYFESMPYRLDESSGLVDYDMLEKTATLFRPKLIIAGASAYPRDFDYPRMRKIADAVGAFLMMDMAHISGLVAASVVANPFEYCDIVTTTTHKSLRGPRGGMIFFKKDPVLGVDLESAINNAVFPGLQGGPHNHTIGGLAVCLKHAKSPDFKAYQNKVVSNCRALASRLTELGYKLVSGG…	At4g32520	XP_004253097.1	9	30	3	1.754	0.0113107	5	0	5	1.2.5	PS.photorespiration.glycerate kinase	-	-	5	Cp	Cp	Cp	C	62.1	stroma	plastid	-
Solyc04g015150	PGLP2	Phosphoglycolate phosphatase IPR006349 2-phosphoglycolate phosphatase, eukaryotic	MVLATPPSNLKLYKFDYIFRENISLFSYWHYFIQIVLFMNGKISKSLCVDKELLDSVDAFLFDCDGVIWKGEKLIDGVPETLDLLRSHGKKLVFVTNNSTKSRKQYAKKFLSLGILVNEDEIFSSSFAAAMYLKVNDFPREKKVYVignaEEGILEELEQAGFTALGGPADGKKNIELKSDCLFEHDKNVGAVIVGLDQHINFYKLQYGTLCIRENPGCLFIATNRDAVGHLTDLQEWPGAGCMVAAICGTTQKEPITVGKPSTFLMDFLLQKYNITTSRMCMVGDRLDTDILFGQGCRTLLVFSGVTNESNYEDLSKEVKPEYYTNSIADMLRYI	At5g47760	XP_010319217.1	6	22	2	-	0	0	3	3	35.1	not assigned.no ontology	-	-	5	-	-	-	C	97.25	plastid stroma	plastid	-
A Proteins were identified by acetone preparations and/or the gel method. For emPAI and Mol% calculations, only the data from the acetone preparations were used. Proteins identified solely by the gel method have data for the number of peptides, PSMs and unique peptides.
B Names of tomato proteins were based on the literature, NCBI annotation (identified in BlastP searches), and/or SolyGenomics descriptor. In a small number of cases, tomato protein names were assigned based on NCBI annotations and the Arabidopsis homolog.
C Some Sol Genomics descriptors were updated when NCBI annotations and Arabidopsis gene annotations were aligned.
D Target P's subcellular locations are: chloroplast (Cp), mitochondria (M), secretory (S), and no predicted location is indicated by a dash (-).
E ChloroP was used to predict the presence of a chloroplast transit peptide (Y) and the lack of a predicted transit peptide is indicated with a dash (-).
F Predotar's predicted subcellular locations were: chloroplast/plastid (Cp),endoplasmic reticulum (ER) or mitochondrion (M). For proteins with localization predictions that were less clear, Predotar provided categorized of possibly Cp, M and ER. Proteins with unresolved locations or that did not have a homolog detected by Predotar are indicated with a dash (-).
G WoLF PSORT's and YLoc's predicted subcellular locations were: chloroplast/plastid (Cp), cytosol (C), cytoskeleton (Cy), endoplasmic reticulum (ER), extracellular (EX), golgi apparatus (G), mitochondrion (M), nucleus (N), peroxisomes (P), plasma membrance (PM), and vacuole (V). Proteins with no chloroplast location in WoLF PSORT are indicated by not Cp.The number of proteins predicted to be in t…

## Sheet: Table S7I. Paralogs
Table S7I. Tomato paralogs associated with carbon metabolism.
Metabolic Pathway	Gene and protein descriptors			ProteomicsA										Mapman Bin Codes
	Tomato locus	Gene name B	Protein DescriptorC	Arabidopis homolog	Peptides	PSMs	Unique Peptides	emPAI	Mol %	mol% sum	Fold difference in paralog expression	Acetone samples	Gel samples	Bin code	Bincode
Calvin Cycle	Solyc09g011810	CFBP1	FBPase1, Fructose-1 6-bisphosphatase class 1 (AHRD V1 **** D0MHZ8_RHOM4); contains Interpro domain(s) IPR000146 Fructose-1,6-bisphosphatase	At3g54050	11	184	11	12.111	0.078098	0.126958	1.59839	5	3	1.3.7	PS.calvin cycle
	Solyc10g086730	CFBP1	Fructose-1 6-bisphosphatase class 1 (AHRD V1 ***- D0MHZ8_RHOM4); contains Interpro domain(s) IPR000146 Fructose-1,6-bisphosphatase	At3g54050	7	49	7	7.577	0.0488604			5	3	1.3.7	PS.calvin cycle
	Solyc06g009630	CP12	CP12 (AHRD V1 ***- O24136_TOBAC); contains Interpro domain(s) IPR003823 Protein of unknown function CP12	At3g62410	2	43	2	1.154	0.00744159	0.00995006	2.96658	5	3	1.3	PS.calvin cycle
	Solyc01g079470	CP12	CP12 (AHRD V1 ***- O24136_TOBAC); contains Interpro domain(s) IPR003823 Protein of unknown function CP12	At3G62410	1	10	1	0.389	0.00250847			5	3	35.2	not assigned.unknown
	Solyc06g075010	CPN60A1	Chaperonin - RuBisCo LS binding protein (AHRD V1 ***- B2IXD2_NOSP7); contains Interpro domain(s) IPR001844 Chaperonin Cpn60	At2g28000	11	52	8	2.3	0.0148316	0.242516	15.3513	5	2	1.3.13	PS.calvin cycle
	Solyc11g069790	CPN60A2	Chaperonin - RuBisCo LS binding protein (AHRD V1 ***- B2IXD2_NOSP7); contains Interpro domain(s) IPR001844 Chaperonin Cpn60	At2g28000	28	276	24	35.308	0.227684			5	3	1.3.13	PS.calvin cycle
	Solyc02g062340	FBA2	Fructose-bisphosphate aldolase (AHRD V1 ***- Q9SXX4_NICPA); contains Interpro domain(s) IPR000741 Fructose-bisphosphate aldolase, class-I	At4g38970	15	356	6	17.957	0.115796	0.385428	2.32851	5	3	1.3.6	PS.calvin cycle
	Solyc02g084440	FBA3	Fructose-bisphosphate aldolase (AHRD V1 ***- Q9SXX4_NICPA); contains Interpro domain(s) IPR000741 Fructose-bisphosphate aldolase, class-I	At4g38970	19	316	10	41.813	0.269632			5	3	1.3.6	PS.calvin cycle
	Solyc12g094640	GAPB-1	Glyceraldehyde-3-phosphate dehydrogenase B (AHRD V1 ***- B4F8L7_MAIZE); contains Interpro domain(s) IPR000173 Glyceraldehyde 3-phosphate dehydrogenase	At1g42970	23	447	7	20.544	0.132478	0.253601	1.09375	5	3	1.3.4	PS.calvin cycle
	Solyc04g082630	GAPB-2	Glyceraldehyde-3-phosphate dehydrogenase B (AHRD V1 **** B4F8L7_MAIZE); contains Interpro domain(s) IPR000173 Glyceraldehyde 3-phosphate dehydrogenase	At1g42970	22	379	6	18.783	0.121123			5	3	1.3.4	PS.calvin cycle
	Solyc05g013150	LSMT1	Set domain protein (AHRD V1 ***- C1EFC8_9CHLO); contains Interpro domain(s) IPR011192 Rubisco methyltransferase	At1g14030	1	4	1	0.129	0.000831859	0.0407933	48.0388	3	0	1.3.13	PS.calvin cycle
	Solyc05g013160	LSMT2	Set domain protein (AHRD V1 ***- C1EFC8_9CHLO); contains Interpro domain(s) IPR011192 Rubisco methyltransferase	At1g14030	14	71	14	6.197	0.0399615			5	3	1.3.13	PS.calvin cycle
	Solyc01g111120	pdTPI-2A	Triosephosphate isomerase (AHRD V1 **** D6N3G7_GOSHI); contains Interpro domain(s) IPR000652 Triosephosphate isomerase	At2g21170	11	262	4	20.544	0.132478	0.240704	1.2241	5	3	1.3.5	PS.calvin cycle
	Solyc10g054870	pdTPI-2B	Triosephosphate isomerase (AHRD V1 ***- A9PH17_POPTR); contains Interpro domain(s) IPR000652 Triosephosphate isomerase	At2g21170	12	219	5	16.783	0.108225			5	3	1.3.5	PS.calvin cycle
TCA Cycle	Solyc03g034220	RBCS-2A	Ribulose bisphosphate carboxylase small chain (AHRD V1 ***- A9YTZ7_SOLTU); contains Interpro domain(s) IPR000894 Ribulose bisphosphate carboxylase, small chain	At5g38410	8	216	1	11.589	0.0747319	0.170486	1.2813	4	3	1.3.2	PS.calvin cycle
	Solyc02g085950	RBCS-3B	Ribulose bisphosphate carboxylase small chain (AHRD V1 ***- A9YTZ7_SOLTU); contains Interpro domain(s) IPR000894 Ribulose bisphosphate carboxylase, small chain	At5g38410	8	231	1	14.849	0.0957541			5	3	1.3.2	PS.calvin cycle
	Solyc09g011080	RCA2B	Ribulose-1 5-bisphosphate carboxylase/oxygenase activase 1 (AHRD V1 **** Q9AXG1_GOSHI); contains Interpro domain(s) IPR003959 ATPase, AAA-type, core	At2g39730	27	430	8	110.034	0.709556	1.8789	1.64799	5	3	1.3.13	PS.calvin cycle
	Solyc10g086580	RCA2A	Ribulose-1 5-bisphosphate carboxylase/oxygenase activase 1 (AHRD V1 ***- Q9AXG1_GOSHI); contains Interpro domain(s) IPR003959 ATPase, AAA-type, core	At2g39730	28	677	9	181.335	1.16934			5	3	1.3.13	PS.calvin cycle
	Solyc07g052350	ACO	Aconitate hydratase, cytoplasmic [Solanum lycopersicum]	At2g05710	22	93	15	4.109	0.026497	0.0468743	1.30032	5	3	8.1.3	TCA / org transformation.TCA.aconitase
	Solyc12g005860	ACO	Aconitase/iron regulatory protein 2 // aconitase 3 [Arabidopsis thaliana]	At2g05710	19	77	12	3.16	0.0203773			5	3	8.1.3	TCA / org transformation.TCA.aconitase
	Solyc03g071590	NADP-MDH	Malate dehydrogenase (AHRD V1 **** Q5NE17_SOLLC); contains Interpro domain(s) IPR011273 Malate dehydrogenase, NADP-dependent, plants	At5g58330	15	67	3	4.623	0.0298115	0.101487	2.40428	5	3	8.2.9	TCA / org transformation.other organic acid transformatons.cyt MNADH
	Solyc11g007990	NADP-MDH	Malate dehydrogenase (AHRD V1 **** Q5NE17_SOLLC); contains Interpro domain(s) IPR011273 Malate dehydrogenase, NADP-dependent, plants	At5g58330	19	114	7	11.115	0.0716753			5	3	8.2.9	TCA / org transformation.other organic acid transformatons.cyt MNADH
	Solyc03g115990	pNAD-MDH	Malate dehydrogenase (AHRD V1 **** O48906_MEDSA); contains Interpro domain(s) IPR010097 Malate dehydrogenase, NAD-dependent, eukaryotes and gamma proteobacteria	At3g47520	10	69	10	4.623	0.0298115	0.0627312	1.10426	5	3	8.2.9	TCA / org transformation.other organic acid transformatons.cyt MNADH
	Solyc09g091070	pNAD-MDH	Malate dehydrogenase IPR010097 Malate dehydrogenase, NAD-dependent, eukaryotes and gamma proteobacteria	At3g47520	8	54	3	5.105	0.0329197			5	3	8.2.9	TCA / org transformation.other organic acid transformatons.cyt MNADH
	Solyc08g066360	NADP-ME	Malic enzyme IPR012302 Malic enzyme, DNA-binding	At1g79750	2	5	1	0.172	0.00110915	0.0183589	15.5523	1	0	8.2.10	TCA / org transformation.other organic acid transformatons.malic
	Solyc12g044600	NADP-ME	NADP-dependent malic enzyme, chloroplastic (AHRD V1 ***- MAOC_FLAPR); contains Interpro domain(s) IPR012302 Malic enzyme, DNA-binding	At1g79750	10	35	9	2.675	0.0172498			5	3	8.2.10	TCA / org transformation.other organic acid transformatons.malic
	Solyc04g008590	PDH E1-beta	Pyruvate dehydrogenase E1 component subunit beta (AHRD V1 ***- B6TQ36_MAIZE); contains Interpro domain(s) IPR005475 Transketolase, central region	At2g34590	4	12	1	2.162	0.0139417	0.0223893	1.65038	4	1	8.1.1.1	TCA / org transformation.TCA.pyruvate NADH.E1
	Solyc08g016750	PDH E1-beta	Pyruvate dehydrogenase E1 component subunit beta (AHRD V1 ***- B6TQ36_MAIZE); contains Interpro domain(s) IPR005475 Transketolase, central region	At2g34590	4	6	1	1.31	0.00844756			1	3	8.1.1.1	TCA / org transformation.TCA.pyruvate NADH.E1
Major carbohydrates	Solyc02g066950	AMY3A	Alpha amylase 3 (IC) IPR006589 Glycosyl hydrolase, family 13, subfamily, catalytic region	At1g69830	10	23	10	0.931	0.00600357	0.00637758	16.0517	5	1	2.2.2.1.1	major CHO metabolism.degradation.starch.starch cleavage.alpha amylase
	Solyc05g007070	AMY3B	Alpha amylase 3 (IC) (AHRD V1 *-** Q010P9_OSTTA); contains Interpro domain(s) IPR006589 Glycosyl hydrolase, family 13, subfamily, catalytic region	At1g69830	1	5	1	0.058	0.000374014			5	0	2.2.2.1.1	major CHO metabolism.degradation.starch.starch cleavage.alpha amylase
	Solyc08g007130	BMY3A	Beta-amylase 3 (AHRD V1 **** D7MC27_ARALY); contains Interpro domain(s) IPR001554 Glycoside hydrolase, family 14	At4g17090	3	5	2	0.359	0.00231502	0.00505564	1.18384	2	0	2.2.2.1.2	major CHO metabolism.degradation.starch.starch cleavage.beta amylase
	Solyc08g077530	BMY3B	Beta-amylase (AHRD V1 **** Q5F305_SOYBN); contains Interpro domain(s) IPR001371 Glycoside hydrolase, family 14B, plant	At4g17090	4	5	3	0.425	0.00274062			2	0	2.2.2.1.2	major CHO metabolism.degradation.starch.starch cleavage.beta amylase
	Solyc04g082290	ESV1	Early starvation 1-like	At1g42430	2	5	2	0.389	0.00250847	0.0164502	5.55784	5	1	35.2	not assigned.unknown
	Solyc12g094570	ESV1-like	Early starvation 1-like	At1g42430	4	10	4	2.162	0.0139417			5	0	35.2	not assigned.unknown
	Solyc03g065340	PHS1A	Phosphorylase (AHRD V1 **** B9SJB6_RICCO); contains Interpro domain(s) IPR011833 Glycogen/starch/alpha-glucan phosphorylase	At3g29320	24	85	20	3.19	0.0205708	0.048538	1.35956	5	3	2.2.2.2	major CHO metabolism.degradation.starch.starch phosphorylase
	Solyc05g012510	PHS1B	Phosphorylase (AHRD V1 **** B9HXL0_POPTR); contains Interpro domain(s) IPR011833 Glycogen/starch/alpha-glucan phosphorylase	At3g29320	24	127	20	4.337	0.0279672			5	3	2.2.2.2	major CHO metabolism.degradation.starch.starch phosphorylase
	Solyc04g082400	SBE2.2A	1,4-alpha-glucan branching enzyme (AHRD V1 **** Q08131_MANES); contains Interpro domain(s) IPR006589 Glycosyl hydrolase, family 13, subfamily, catalytic region	At5g03650	13	45	12	2.252	0.0145221	0.0557023	2.8357	5	3	2.1.2.3	major CHO metabolism.synthesis.starch.starch branching
	Solyc09g009190	SBE2.2B	1,4-alpha-glucan branching enzyme II (AHRD V1 **** P93691_WHEAT); contains Interpro domain(s) IPR006589 Glycosyl hydrolase, family 13, subfamily, catalytic region	At5g03650	24	118	24	6.386	0.0411802			5	3	2.1.2.3	major CHO metabolism.synthesis.starch.starch branching
	Solyc02g071040	SS4	Starch synthase IV, Glycogen synthase (AHRD V1 *-*- D1R4V0_9CHLA); contains Interpro domain(s) IPR011835 Glycogen/starch synthases, ADP-glucose type	At4g18240	6	10	6	0.326	0.00210222	0.00545545	1.59509	4	0	2.1.2.2	major CHO metabolism.synthesis.starch.starch synthase
	Solyc07g042830	SS6	Starch Synthase VI, Glycogen synthase (AHRD V1 ***- D1R4V0_9CHLA); contains Interpro domain(s) IPR011835 Glycogen/starch synthases, ADP-glucose type	At4g18240	4	8	4	0.52	0.00335323			4	0	2.1.2.2	major CHO metabolism.synthesis.starch.starch synthase
Minor carbohydrates	Solyc11g042940	FGGY	Carbohydrate kinase FGGY (AHRD V1 ***- B7KH14_CYAP7); contains Interpro domain(s) IPR000577 Carbohydrate kinase, FGGY	At2g21370	6	13	6	1.448	0.00933745	0.032823	2.51519	4	3	3.7	minor CHO metabolism.sugar kinases
	Solyc11g042950	FGGY	Carbohydrate kinase FGGY IPR000577 Carbohydrate kinase, FGGY	At2g21370	2	4	2	3.642	0.0234855			3	3	3.7	minor CHO metabolism.sugar kinases
	Solyc08g078370	-	Kinase pfkB family protein (AHRD V1 **-- Q7XDM4_ORYSJ); contains Interpro domain(s) IPR011611 Carbohydrate/purine kinase	At4g28706	2	3	2	0.389	0.00250847	0.0180816	6.20823	2	0	3.5	minor CHO metabolism.others
	Solyc09g064240	-	Kinase pfkB family protein (AHRD V1 ***- Q7XDM4_ORYSJ); contains Interpro domain(s) IPR011611 Carbohydrate/purine kinase	At4g28706	6	24	6	2.415	0.0155732			5	3	3.5	minor CHO metabolism.others
	Solyc06g053600	At1g04420-like1	Oxidoreductase aldo/keto reductase family protein expressed (AHRD V1 ***- Q10GW4_ORYSJ); contains Interpro domain(s) IPR020471 Aldo/keto reductase subgroup	At1g04420	14	125	14	18.684	0.120484	0.121232	161.069	5	3	3.5	minor CHO metabolism.others
	Solyc09g074310	At1g04420-like2	Oxidoreductase aldo/keto reductase family protein expressed IPR001395 Aldo_keto reductase	At1g04420	1	1	1	0.116	0.000748028			1	1	3.5	minor CHO metabolism.others
Photorespiration	Solyc07g056540	GLO1A	glycolate oxidase 1	At3g14420	17	159	11	36.927	0.238124	0.272366	6.95424	5	3	1.2.2	PS.photorespiration.glycerate kinase
	Solyc10g007600	GLO1B	glycolate oxidase 1	At3g14420	11	44	6	5.31	0.0342416			5	2	1.2.2	PS.photorespiration.glycerate kinase
	Solyc08g065490	SHM3	Serine hydroxymethyltransferase (AHRD V1 **** B9S1D7_RICCO); contains Interpro domain(s) IPR001085 Serine hydroxymethyltransferase	At4g32520	10	36	4	2.162	0.0139417	0.0252524	1.23261	5	3	1.2.5	PS.photorespiration.glycerate kinase
	Solyc12g095930	SHM3	Serine hydroxymethyltransferase (AHRD V1 ***- B9HDQ7_POPTR); contains Interpro domain(s) IPR001085 Serine hydroxymethyltransferase	At4g32520	9	30	3	1.754	0.0113107			5	0	1.2.5	PS.photorespiration.glycerate kinase
OPP	Solyc07g066270	PGL4	Glucosamine-6-phosphate deamise IPR005900 6-phosphogluconolactose	At5g24400	4	21	3	1.61	0.0103821	0.0158505	1.89858	5	1	7.1.2	OPP.oxidative PP.6-phosphogluconolactose
	Solyc03g082580	PGL4	Glucosamine-6-phosphate deamise (AHRD V1 ***- GB_ACHLI); contains Interpro domain(s) IPR005900 6-phosphogluconolactose	At5g24400	4	16	4	0.848	0.00546834			5	3	7.1.2	OPP.oxidative PP.6-phosphogluconolactose
Glycolysis & glucogenogenesis	Solyc02g078240	-	Probable 2-carboxy-D-arabinitol-1-phosphatase	At5g22620	2	4	2	0.468	0.00301791	0.0283219	8.38462	4	1	4.3.12	glycolysis.unclear/dually targeted.phosphoglycerate mutase
	Solyc06g074510	-	Probable 2-carboxy-D-arabinitol-1-phosphatase	At5g22620	16	62	16	3.924	0.025304			5	3	4.3.12	glycolysis.unclear/dually targeted.phosphoglycerate mutase
A Proteins were identified by acetone preparations and/or the gel method. For emPAI and Mol% calculations, only the data from the acetone preparations were used. Proteins identified solely by the gel method have data for the number of peptides, PSMs and unique peptides.
B Names of tomato proteins were based on the literature, NCBI annotation (identified in BlastP searches), and/or SolyGenomics descriptor. In a small number of cases, tomato protein names were assigned based on NCBI annotations and the Arabidopsis homolog.
C Some Sol Genomics descriptors were updated when NCBI annotations and Arabidopsis gene annotations were aligned.
