# Supplementary material for: The tomato chloroplast stromal proteome compendium elucidated by leveraging a plastid protein-localization prediction Atlas
Source: Front Plant Sci. 2023 Aug 28;14:1020275. doi: 10.3389/fpls.2023.1020275 (PMC10493611; doi:10.3389/fpls.2023.1020275)
Supplement: Supplementary file 10 [file Table_8.xlsx]

## Sheet: Table S8A. Amino acids
Table S8A. Amino acid metabolism
Category	Gene and protein descriptors						Proteomics					Number of times detected			Bin codes		Algorithms								Databases
	Tomato Gene ID	Gene name A	Protein DescriptorB	Protein Sequence	Arabidopis homolog	Tomato protein NCBI accession	Peptides	PSMs	Unique Peptides	emPAI	Mol%	Acetone samples	Gel samples	Total	Bincode	Name	TargetP C ver.1	Transit peptide length	TargetP (reliability class)	ChloroP D	Predotar E	WoLF PSORT F	YLoc F	YLoc % Confidence	PPDB	SUBA4	plprot
Aromatic amino acids	Solyc04g074480	-	3-deoxy-7-phosphoheptulote synthase (Phospho-2-dehydro-3-deoxyheptote aldolase) (DAHP synthetase class II) (AHRD V1 **** A4YX08_BRASO); contains Interpro domain(s) IPR002480 DAHP synthetase, class II	MALSTNTTTNSLLSNKSLLQNQPLLSSPSKNAFFSNKSTKTVRFVQPIAAVHSSDSNKNPIVSDKPSKSSPPAATATTAPAPAVTKTEWAVDSWKSKKALQLPEYPDQEELRSVLKTIDEFPPIVFAGEARSLEERLGEAAMgranaFLLQGGDCAESFKEFNANNIRDTFRILLQMGAVLMFGGQMPVIKVGRMAGQFAKPRSDSFEEKDGVKLPSYRGDNVNGDAFDVKSRTPDPQRLIRAYCQSAATLNLLRAFATGGYAAMQRINQWNLDFtheSEQGDRYRELASRVDEALGFMTAAGLTMNADHPIMKTTEFWTSHECLLLPYEQSLTrRNADSTSGLHYDCSAHFLWVGERTRQLDGAHVEFLRGIANPLGIKVSDKMDPSALVKLIEILNP…	At1g22410	NP_001234418.1	12	54	8	2.162	0.0139417	5	3	8	13.1.6.1.1	amino acid metabolism.synthesis.aromatic aa.chorismate.3-deoxy-D-arabino-heptulosote 7-phosphate synthase	Cp	72	1	Cp	Cp	Cp	Cp	99.9	plastid	plastid	-
	Solyc01g091190	-	3-phosphoshikimate 1-carboxyvinyltransferase (AHRD V1 ***- Q30CZ8_FAGSY); contains Interpro domain(s) IPR001986 3-phosphoshikimate 1-carboxyvinyltransferase, core	MAQISSMAQGIQTLSLNSSNLSKTQKGPLVSNSLFFGSKKVTQISAKSLGVFKKDSVLRVVRKSSFRISASVATAEKPHEIVLEPIKDISGTVKLPGSKSLSNRILLLAALSEGRTVVDNLLSSDDIHYMLGALKTLGLHVEDDNENQRAIVEGCGGQFPVGKKSEEEIQLFLGNAGTAMRPLTAAVTVAGGHSRYVLDGVPRMRERPIGDLVDGLKQLGAEVDCSLGTNCPPVRIVSKGGLPGGKVKLSGSISSQYLTALLMAAPLALGDVEIEIIDKLISVPYVEMTLKLMERFGVFVEHSSGWDRFLVKGGQKYKSPGKAFVEGDASSASYFLAGAAVTGGTVTVEGCGTSSLQGDVKFAEVLEKMGAEVTWTENSVTVKGPPRNSSGMKHLRAID…	At2g45300	NP_001295876.1	11	55	7	3.642	0.0234855	5	3	8	13.1.6.1.6	amino acid metabolism.synthesis.aromatic aa.chorismate.5-enolpyruvylshikimate-3-phosphate synthase	Cp	69	1	Cp	Cp	Cp	Cp	100	stroma	plastid	-
	Solyc05g050980	-	3-phosphoshikimate 1-carboxyvinyltransferase (AHRD V1 **** Q30CZ8_FAGSY); contains Interpro domain(s) IPR001986 3-phosphoshikimate 1-carboxyvinyltransferase, core	MAQISKMTQGIQTLYPNSKIHKPQVPTFLPSLPFGSKNLKKSVKCLWVLNKDSVLTTRSCSSSFRISASVATTQKPSEIVLQPIKEISGTVKLPGSKSLSNRILLLAALSEGTTVVDNLLSSDDIHYMLGALKTLGLQVEDDSGNQQAVVEGCGGLFPAAKESKEEIQLFLGNAGTAMRPLTAAVAVAGGNSRYVLDGVPRMRERPISDLVDGLKQLGAEVDCFLGTKCPPVRIVSKGGLPGGKVKLSGSISSQYLTALLMAAPLALGDVEIEIIDKLISVPYVEMTLKLMERFGISVEHNSSWDRFFVRGGQKYKSPGKAYVEGDASSASYFLAGAAVTGGTITVEGCGTNSLQGDVKFAEVLEKMGAEVTWTENSVTVKGPPRNSSGRKHLHAIDVN…	At2g45300	XP_004240047.1	7	27	3	2.981	0.019223	5	0	5	13.1.6.1.6	amino acid metabolism.synthesis.aromatic aa.chorismate.5-enolpyruvylshikimate-3-phosphate synthase	Cp	67	4	Cp	Cp	Cp	Cp	99.9	stroma	plastid	-
	Solyc06g071550	PAT1	Anthranilate phosphoribosyltransferase (AHRD V1 **** A8IBN0_CHLRE); contains Interpro domain(s) IPR005940 Anthranilate phosphoribosyl transferase	MALFQCRIPFSAVSPSVSPRIEFTKLFLGNSSNPFVKTTQKKFSSLCYALKNSNKHSSISTFSELIEALISGKDLTESESEDSLDFLLDGADEALISAFLVLLRAKGETFEEVVGLARAMIKHCRQVEGLGDAVDIVGTGGDGANTVNISTGASILAAACGAKVAKQGNRSSSSACGSADVLEELGVAIELDPEGVKECVNQAGIGFMMSPIYHPAMKIVRPIRKKLKVKTVFNILGPMLNPARVPFAVVGVYKEDLVHKMAKALQRFGMKRALVVHSEGLDEMSPLGPGLVLDVTPDNIEKFSFDPLDFGIPRCTLESLRGGGPEYNAEMLrRNAVLSGEKGSIADAFALNASAALLVSGRVDNLAEGVELARETLLSGKAVKTLDLWIEVSNTVKEA…	At5g17990	XP_004241508.1	6	15	5	1.336	0.00861522	5	3	8	13.1.6.5.2	amino acid metabolism.synthesis.aromatic aa.tryptophan.anthranilate phosphoribosyltransferase	Cp	9	2	Cp	Cp	Cp	Cp	74.7	plastid stroma	plastid	plastid
	Solyc04g025540	PAT1-like	Anthranilate phosphoribosyltransferase-like protein IPR000312 Glycosyl transferase, family 3	MKDLLYPVDSLVSPLHITTKTRVFSQIRIPIKRVGKRCYFAIKAVLDSASIDELRHEEPDIKNPALSTSYRNSEFSKPNQTVLDAQTKVCTGPTQTKPLNEEQALKVLDTILRSAKGELKDEEPVSKAQLGAFFTAMTIRAFPEPTQWSEGERRAMHRYWPQLIRVLPKDIIFIADPEDSIMGIGSSIGPKFVGNSTAEMRLVGALREVLAGGHLGYEEVQGVLKDILPLKVEEMGSSNVSESLLSAFMIGQRMNRETDRELKAYCLAFDDELGPAPIADVNSLTHYGEPYDGNTRYFRSTLFVAAVRSCYGESCLLHGVDWMPPKGGITEEQMLMFMGANTHLTPSQAKMLLEDDEVGFAYVSQREARPSLYSLIGLREHIKKRPPLATTEKVQQIVR…	At1g70570	XP_004237251.1	9	27	9	1.326	0.00855074	5	0	5	13.1.6.5.2	amino acid metabolism.synthesis.aromatic aa.tryptophan.anthranilate phosphoribosyltransferase	-	-	3	-	-	Cp	Cp	37.8	plastid stroma	plastid	-
	Solyc12g010180	ASB2	Anthranilate synthase beta subunit (AHRD V1 ***- A1KAT4_AZOSB); contains Interpro domain(s) IPR000991 Glutamine amidotransferase class-I, C-terminal	MAGIVTPHVSSQSAIVHINGKNTFLSPQKTLDFPILSGSGGSFLRMRSTKRLEVKPLAVSQNSSATCVELSDDVKRNKSPIIVIDNYDSFTYNLCQYMGELGCSFEVYRNDELTVDELKKKNPRGILISPGPGTPQDSGISLQTVLELGPTIPLFGVCMGLQCMGEAFGGKIVRSPYGVMHGKSSPVYYNEGGEDGLFAGLSNPFTAGRYHSLVIDKDTFPKDALEITAWTEDGLVMAARHKVYRHIQGVQFHPESIITSEGKTIVYNFIKLIERKEEAESQN	At5g57890	XP_004251759.1	3	13	3	3.217	0.0207449	5	3	8	13.1.6.5.1	amino acid metabolism.synthesis.aromatic aa.tryptophan.anthranilate synthase	Cp	36	2	Cp	Cp	Cp	Cp	100	-	cytosol	-
	Solyc06g006100	ASA1	Anthranilate synthase component I family protein expressed (AHRD V1 **** Q10B97_ORYSJ); contains Interpro domain(s) IPR005256 Anthranilate synthase component I	MKTLAVSHHRPVISGTGHRSSIFSGHRATSLSFSRSPVSAARLRILKCSAAISPPSLVDDSVKFKEAAKHGNLIPLYRSIFSNADHLTPVLAYRCLVKEDDREAPSFLFESVEPGLKASNVGRYSVignaAQPTMEIVAKENMVTIMNADHLEGSRTEEFEEDPMSIPRRIMEKWKPQCINELPEAFCGGWVGFFSYDTVRYVEKKKLPFSNAPMDDRNLPDLHLGLYDDVIVFNADHVEKKAFVIHWVRLDRFASVEEAYNDGTTRLEALLSRVHDIVPPTLASGSIKLHTSLFGTSLKNSTMTSEDYQKAVLKAKEHILAGDIFQIVLSQRFERRTFADPFEVYRALRIVNPSPYMTYLQARGCILVASSPEILTRVKKKTVTNRPLAGTIRRGKTL…	At5g05730	XP_004240399.1	17	71	14	3.037	0.0195842	5	3	8	13.1.6.5.1	amino acid metabolism.synthesis.aromatic aa.tryptophan.anthranilate synthase	Cp	47	4	Cp	possibly M	Cp	M	93.5	stroma	plastid	-
	Solyc07g007590	-	Arogenate dehydrogenase 2; Prephete dehydrogenase family protein (AHRD V1 ***- D7KDI5_ARALY); contains Interpro domain(s) IPR012070 Arogete/prephete dehydrogenase, plant	MLSFTPLQSKPTPTSNSNRFSNLTNPTSSTSrRNARHFSVSSPSQVSHHHGrRNARLSIKAIDAAQPYDYEALVSNQYAQSGRLKIAIVGFGNFGQFLAKSFVSKGHFVLAHSRTDYSQIAISLGVSFFQDPHDLCEQHPDVIVLCTSIISTETVLRSLPIQRLKRNTLFVDVLSVKEFPKNIFLQVLPTHFDILCTHPMFGPESGKDSWKDLIFMFDKVRIGEGRSRTARVDKFLDIFEKEGCRMVPMTCAEHDKHAAGSQFITHTMGRVLEKLGLESTPINTKGYETLLNLVDNTASDSFDLYYGLFMYNKNAMEELERLDLAFEALKKELFGHLHDLLRKQLFGKAEEAGQrRNAVLSKLPRNGYALPAPSSDAVKPENN	At1g15710	XP_004242734.1	5	14	5	2.162	0.0139417	5	0	5	13.1.6.4.1	amino acid metabolism.synthesis.aromatic aa.tyrosine.arogete dehydrogenase \& prephete dehydrogenase	Cp	37	1	Cp	Cp	Cp	Cp	81.2	plastid stroma	plastid	-
	Solyc01g067750	-	Bifunctional 3-dehydroquinate dehydratase/shikimate dehydrogenase	MELVVDSGVKKMEGEAMRKNQTLICAPIMADSVDQMLILMQKAKISGADLVEVRVDSLKSFNPRPDIDTLIKQCPLPTLFTYSYVLGVGQGILLIRYYKGIGPTWEGGQYAGDEKSRLDALRLAMELGADYIDVELKAIGEFNLHGNKSAKCKLIVSSHNYESTPSAEDLGNLVARIQASGADIVKFATTAQDITDVARVFQITVHSQVPIIAMVMGEKGLMSRILCPKFGGYLTFGTLEVGKVSAPGQPTVEDLLNLYNFRQLGPDTKIFGIIGKPVSHSKSPLLYNESFRSVGFNGVFMHLLVDDIANFFRTYSSLDFAGFSCTIPHKEAALDCCAEIDPTAKAIGAVNCIIRRPDGKLFGCNTDYIGAISAIEEGLQGSQPSISGSPLAGKLFVVi…	At3g06350	NP_001234051.1	10	36	10	2.481	0.0159988	5	3	8	13.1.6.1.10	amino acid metabolism.synthesis.aromatic aa.chorismate.dehydroquite/shikimate dehydrogenase	-	-	2	-	-	Cp	C	99.55	stroma	plastid	-
	Solyc06g084460	-	Bifunctional 3-dehydroquinate dehydratase/shikimate dehydrogenase	MQVLTWFVLYMFPPLYKRERWSVKEERDIIMGLKNDLVVYTRLECESCEEMTCCIEKAKEEGADLVELCIDDFTFSDISQLEELLKQRSLPSIVSFRPKSPINSEGKKTCIQVLKLAVELDVEFVEVDTQVVCHQVVAELMKSRSNSKIIASTYVNGGNPTKDTLCNSIINLQSTGADIIKLVIDVAYITDVAPVFHMLTHSQVPLIVRAAGDRGLISQLLGPKYGAFFVCGSLGGKYTPGLPSLTTIKQVYKLQYVNPDTRIFGVISNPVGHSKGPLLHNPAFRHTGYNGIYVPLLVDNVKEFFRVFSCNDYAGFSVGIPHKEAAVRCCDEVDPLAKSIGAVNTIIRRPSDGKLIGYNTDCEACVTAIEDALRERQKTNGHASNVSPIAGKLFVLVGA…	At3g06350	XP_004242317.3	2	7	1	0.179	0.00115428	4	3	7	13.1.6.1.10	amino acid metabolism.synthesis.aromatic aa.chorismate.dehydroquite/shikimate dehydrogenase	M	108	5	-	ER	Cp	C	74.42	stroma	plastid	-
	Solyc10g038080	-	Bifunctional 3-dehydroquinate dehydratase/shikimate dehydrogenase	MGSVGLLKNSAMVCAPLMATSVDQLIDEMVEAKSQGADCVEIRLDAIHNFQPHKHLQLLFKNKPLPILILYRPIWERNDFEADAHKQLEALRLAKELGADYVELDLKIASEFAKNEKSSWSSGCKLITSCFVDNVTSKEDLSQVVASMQSTGADILKIVINDITELEKTFHLLSHCQVPLIAYSVGERGLISQLLGPKFGSVLLYGSLDGVPGLPSLASLRQAYGVDLMDNDTKVFGLISKPVGHSKGPILHNPTFRHVGYNGIYVPMFVDDLKEFFRVYSSPDFAGFSVGIPYKEAVVSFCDEVDPLAESIGAVNTIIRRPCDGKLIGYNTDCEASITAIEDALKANGEALVPCSLARKMFVLVGAGGAGRALAFGAKSRGARIVIFDIDFDRAKALA…	At3g06350	XP_010327280.1	1	3	1	0.077	0.000496536	3	0	3	13.1.6.1.10	amino acid metabolism.synthesis.aromatic aa.chorismate.dehydroquite/shikimate dehydrogenase	S	-	4	-	-	Cp	Cp	79.4	stroma	plastid	-
	Solyc02g088460	CM1	Chorismate mutase 1 (AHRD V1 **** D2CSU4_PETHY); contains Interpro domain(s) IPR008238 Chorismate mutase of the AroQ class, eukaryotic type	MEAQLLRLSSTPITTPLITNYKRNNTLLPHQKFLKFHLSNSGTIKHGIRPIQAFSASLGEMKRIDETESYTLDGIRNSLIRQEDSIIFSLVERAQYCFNAETYDPNVFVMDGFHGSLVEYIVKETEKLHAKVGRYTSPDEHPFFPKTLPEPMLPPMQYPKVLHSAADSININVTIWEMYFKKLLPRLVKEGNDGNSGSTAVCDTICLQALSKRIHYGKFVAEAKFRASPDVYKAAIKAQDRDGLMDLLTYPTVEEAIKNRVEMKTKTYGQELNNGPEHVGDPVYKIKPSLVAELYGDWIMPLTKDVQVEYLLRRLD	At3g29200	XP_004232192.1	5	18	5	2.455	0.0158311	5	3	8	13.1.6.2.1	amino acid metabolism.synthesis.aromatic aa.phenylalanine and tyrosine.chorismate mutase	Cp	2	5	-	possibly Cp	Cp	Cp	99.7	plastid stroma	-	-
	Solyc04g049350	CS	Chorismate synthase (AHRD V1 **** A5APN1_VITVI); contains Interpro domain(s) IPR000453 Chorismate synthase	MASFVPTKQFVGASSSSDIGSSRLVSLQLPSKFSSSNFHLPSRPSQLKRLEIQAAGSTFGNYFRVTTFGESHGGGVGCIIDGCPPRLPLSESDMQVELDrRNARPGQSRITTPRKETDTCKISSGTADGLTTGSPIKVEVPNTDQRGNDYSEMSLAYRPSHADATYDFKYGVRSVQGGGRSSARETIGRVAAGAVAKKILKLYSGAEVLAYVSQVHQVVLPEDLINADHQNVTLEQIESNIVRCPDPEYAEKMIAAIDAVRVRGDSVGGVVTCIVRNLPRGLGTPVFDKLEAELAKACMSLPATKGFEFGSGFAGTFMTGSEHNDEFYMDEHGRIRTRTNRSGGIQGGISNGEVINMRIGFKPTSTISRKQQTVTRDKHETELIARGRHDPCVVPRAVP…	At1g48850	XP_001234422.1	9	49	2	2.675	0.0172498	5	3	8	13.1.6.1.7	amino acid metabolism.synthesis.aromatic aa.chorismate.chorismate synthase	Cp	64	2	Cp	Cp	Cp	Cp	99.8	stroma	plastid	-
	Solyc02g083590	DHQS	Dehydroquite synthase (AHRD V1 ***- Q8RU74_SOLLC); contains Interpro domain(s) IPR016037 3-dehydroquite synthase AroB, subgroup	MASSFCPKQALSFTNSTHQLHQSRAIPRDIHVRFPAPVSSPSSRCGLKSKATTRLKVLATSATKVMNADHSSSKASSQAPTVVEVDLGTRSYPIYIGAGLLDQPDLLQRHIHGKRVLVVTNTTVAPLYLDKTISALTDGNPNVTVESVILPDGEQFKNMETLMKVFDKAIESRLDRRCTFVALGGGVignaDMCGYAAASYLRGVNFIQIPTTVMAQVDSSVGGKTGINHPLGKNMIGAFYQPQCVLIDTDTLNTLPDRELASGLAEVIKYGLIRDAEFFEWQEQNMPLLLARDPTAFTYAIKRSCENKADVVSQDEKESGVRATLNLGHTFGHAVETGVGYGQWLHGEAVAAGTVMAVDMSRRLGWIDDSLVQRVQKILQQAKLPTSPPETMTVEMFK…	At5g66120	NP_001233863.1	12	48	12	4.275	0.0275674	5	3	8	13.1.6.1.2	amino acid metabolism.synthesis.aromatic aa.chorismate.3-dehydroquite synthase	Cp	61	2	Cp	Cp	Cp	Cp	100	stroma	peroxisome	-
	Solyc03g058860	DHQS	3-dehydroquite synthase (AHRD V1 ***- B4FYZ3_MAIZE); contains Interpro domain(s) IPR002812 3-dehydroquite synthase, prokaryotic-type	MDILLPSLSHSFPKFAGKRQNCRKFLGINRVARMCAFTPSNSKKKTVWIWTENKQVMTAAVEGGWNTFIFPSNRQDLALEWSSIAVIHPVFIKEGRLINADHEHKSVAAFAEISSPQQLEQFQISEEQSDKVVVNLLDWQVIPAENIVAAFQGTQTTVLAVSKNQSEAQAFLEALEHGLGGVVMKVEDVGAILELKGYFDRRREVDSLLNLTKAIITHIQVTGMGDRVCVDICSLMRPGEGLLVGSFARGLFLVHSECLESNYISSRPFRVNAGPVHAYVAVPGGKTSYLSELKSGKEVIVVDQRGMQRTAIVGRVKVETRPLILVEAKVESENESYSILLQNAETVGLVSPLHGEGHQRTTIPVTSLEVGSEVLLLLQGGARHTGIEIKEFIVEK	At3g28760	XP_004234776.1	7	27	7	2.415	0.0155732	5	3	8	35.2	not assigned.unknown	Cp	57	3	Cp	-	Cp	C	77	-	plastid	-
	Solyc03g111850	IGPS	Indole-3-glycerol phosphate synthase-like (AHRD V1 **** C8TFG9_ORYSI); contains Interpro domain(s) IPR013798 Indole-3-glycerol phosphate synthase	MDSVMPLRTTTAATATAASAAATVRPRFSFQLLANPRPRKPAFSLSVPTTIFTTHRARILPQFTPVRAQEDNSALVSESTIPEGDALKIKEWEVERFQDEIAASQGIKIrRNARPTTGPPLHYVGPFEFRMQNEGNTPINILEEIIWYKDKEVSQMKEKKPLLLLKKLLSSVPPTRDFLGALRESYSRTGLPALIAEVKKASPSRGVLRENFNPVEIAKAYERGGAACLSVLTDQKYFQGSFENLEAIRNAGVECPLLCKEFVIEAWQIYYARVKGADAILLIAAVLPNLDIQYMIKICKLLGLTALVEVHDEREMDRVLGIDGVELIGINNRDLGTFKVDISNTKKLLEGERGERIREKGIIVVGESGLFTPADIGYVQEAGVKAVLVGESLVKQEDP…	At5g48220	XP_004236289.1	10	42	10	2.162	0.0139417	5	3	8	13.1.6.5.4	amino acid metabolism.synthesis.aromatic aa.tryptophan.indole-3-glycerol phosphate synthase	Cp	67	2	Cp	Cp	Cp	Cp	100	plastid stroma	plastid	plastid
	Solyc06g051410	PAI1	N-(5'-phosphoribosyl)anthranilate isomerase (AHRD V1 **** B9SQM9_RICCO); contains Interpro domain(s) IPR011060 Ribulose-phosphate binding barrel	MLSVFNMGAQLQPRVignaLPRSQGVLDVEVYSINRAQLRTSTSNRFMCTLNQSTGVSAQAAQTESRTLVKMCGITSARDAALAAEAGANFIGMIIWPNSKRSVSLSTAKEISKVAREYGALPVGVFVDDNANTILRASDAANLELVQLHGNDSRDAFPVLVRERPLVYVLHADEEGGLLNSISNEESSLVDWILVDSAKGGSGKGFNWAQFKLPSIRSKQGWLLAGGINPENVCEALSALKPNGVDVSSGICGQDGIKKDESRIQSFMNAVKSLHL	At1g07780	XP_010322191.1	2	5	1	0.585	0.00377238	4	3	7	13.1.6.5.3	amino acid metabolism.synthesis.aromatic aa.tryptophan.phosphoribosyanthranilate isomerase	M	109	5	Cp	possibly M	Cp	Cp	99.3	plastid stroma	plastid	-
	Solyc11g009080	DHS1	Phospho-2-dehydro-3-deoxyheptote aldolase 1 (AHRD V1 ***- B6TUB8_MAIZE); contains Interpro domain(s) IPR002480 DAHP synthetase, class II	MALSNTLSLSSSKSLVQSHLLHNPTPQPRFSLFPTTQHGrRNAHPISAVHAAEPSKTAVKQGKWSLDSWKTKKALQLPEYPDEKELESVLKTLEMNPPLVFAGEARSLEEKLGEAALGKAFLLQGGDCAESFKEFNANNIRDTFRILLQMSVVLMFGGQVPVIKVGRMAGQFAKPRSDPFEEINGVKLPSYKGDNINGDTFDEKSRIPDPHRLIRAYMQSAATLNLLRAFATGGYAAMQRVTEWNLDFVENSEQGDRYQELAHRVDEALGFMAAAGLTVNADHPIMSTTDFWTSHECLLLPYEQALTREDSTSGLFYDCSAHMVWVGERTRQLDGAHVEFLRGVANPLGIKVSQKMDPKELIKLIDILNPANKPGRITVIVRMGAENMRVKLSHLVRAV…	At4g39980	NP_001234415.2	15	79	12	4.298	0.0277157	5	3	8	13.1.6.1.1	amino acid metabolism.synthesis.aromatic aa.chorismate.3-deoxy-D-arabino-heptulosote 7-phosphate synthase	Cp	45	3	Cp	Cp	Cp	Cp	100	plastid	plastid	-
	Solyc01g105420	DHS2	Phospho-2-dehydro-3-deoxyheptote aldolase 2 IPR002480 DAHP synthetase, class II	MDPNELVKLIDILNPQNRPGRITVIARMGADNMRVKLPHLIRAIRGAGQIVTWVSDPMHGNTTKAPCGLKTRSFDSIRAEVRAFFDVHDQEGSYPGGVHLEMTGQNVTECVGGSRTITYNDLSSRYHTHCDPRLSQALELAFIIAERLRKRRLGPKFGF	At4g33510	XP_004230644.2	5	49	2	2.511	0.0161922	5	3	8	13.1.6.1.1	amino acid metabolism.synthesis.aromatic aa.chorismate.3-deoxy-D-arabino-heptulosote 7-phosphate synthase	-	-	4	-	-	not Cp	Cp	98.78	plastid	plastid	-
	Solyc01g105390	DHS2	Phospho-2-dehydro-3-deoxyheptote aldolase 2 (AHRD V1 ***- B6UAK5_MAIZE); contains Interpro domain(s) IPR002480 DAHP synthetase, class II	MKGKLEIINSKWFLNRVSHKMDPNELVKLIDILNPQNRPGRITVIARMGADNMRVKLPHLIRAIRGAGQIVTWVSDPMHGNTTKAPCGLKTRSFDSIRAEVRAFFDVHDQEGSYPGGVHLEMTGQNVTECVGGSQTITYNDLSSRYHTHCDPRLSQALNLPLLLRSASGKEDWVLSLGFRKPILLPFH	At4g33510	XP_019067386.1	3	14	2	0.701	0.00452041	5	3	8	13.1.6.1.1	amino acid metabolism.synthesis.aromatic aa.chorismate.3-deoxy-D-arabino-heptulosote 7-phosphate synthase	-	-	3	-	-	not Cp	Cp	99.7	plastid	plastid	-
	Solyc11g072520	ADT2	Prephenate dehydratase (AHRD V1 ***- B7X943_HEVBR); contains Interpro domain(s) IPR001086 Prephete dehydratase	MAATIVRSPKLSLSLSTPESTTSNLPSLNQSFFTPLPKrRNARCISIYACSAGDQSNSAFGGEIKKGQAIELNKVNDENPYEFNAKDSPNPLPRPLTSADLNNMASQGSRLRVAYQGVRGAYSESAAEKAYPNCEAVPCEQFDTAFEAVERWLVDRAVLPIENSLGGSIHRNYDLLLRHRLHIVGEVKLAVRHCLLANNGVKIEDLKRVLSHPQALAQCENTLTKLGLVREAVDDTAGAAKYIAFSKLKDAGAVASLAASRIYGLNVLAQDIQDDSDNVTRFLMLAREPIIPRTDKPFKTSVVFSLDEGPGVLFKALAVFAMRNINLTKIESRPLQKQALKVLEDSADGFPKYFPYLFYVDFEASMADQRAQNALGHLKQRICYLFASFRKLPFG	At3g07630	XP_004251274.1	6	16	5	1.015	0.00654525	4	2	6	13.1.6.3.1	amino acid metabolism.synthesis.aromatic aa.phenylalanine.arogete dehydratase / prephete dehydratase	Cp	49	2	Cp	Cp	Cp	Cp	99.7	plastid stroma	plastid	-
	Solyc06g074530	ADT3	Prephenate dehydratase (AHRD V1 **** Q6JJ29_IPOTF); contains Interpro domain(s) IPR001086 Prephete dehydratase	MHTIAPSSGVTLKSLVQQTSPPPAQISRFVPARLVVQCGYRFDSANTNASTVNTNGIPASNNFAGHVGASRADWQSSCAILASKVVSQQQDTEKTGGAGEITVVNGHKSLDLVPLDNNLPKPLTITDLSPAPMHGSQLRVAYQGVPGAYSEAAAGKAYPKCEAIPCDQFEVAFQAVELWIADRAVLPVENSLGGSIHRNYDLLLRHRLHIVGEVQLPVHHCLLALPGVRKEYLTRVISHPQALAQCELTLTKLGLNVVREAVDDTAGAAEYIAANNLRDTAAIASARAAELYGLQILSEGIQDDSSNVTRFVMLAREPIIPRTDRPFKTSIVFAHDKGTSVLFKVLSAFAFRNISLTKIESRPHRNRPIRLVDDANVGTAKHFEYMFYVDFEASMADVR…	At1g08250	XP_004241304.1	5	14	1	0.778	0.00501695	4	3	7	13.1.6.3.1	amino acid metabolism.synthesis.aromatic aa.phenylalanine.arogete dehydratase / prephete dehydratase	Cp	48	2	Cp	possibly Cp	Cp	Cp	100	plastid stroma	plastid	-
	Solyc02g080620	ADT1	Prephenate dehydratase family protein (AHRD V1 **** D7KMI7_ARALY); contains Interpro domain(s) IPR001086 Prephete dehydratase	MALKLVPIWACCTNQQHCCTYPQSLKLGYGSRLSGSSFLNLRAHKKWECLVLLSETERAITPVEDEQPLAPPGDASVQEAQIIQSKGFHRDLQSLPKPLSATYLSSGQHDGSNVRVAYQGIPGAYSEAAALKAYPKCETVPCDQFEAAFKAVELWLVDKAVLPIENSVAGSIHRNYDLLLRHRLHIVGEVQLLVNHCLLGLPGIRKEELKRVVSHPQALEQCNIMLNELGVARLSSDDTSSAAQIVASEGKRDTGAVASARAAEIYGLSILAERIQDDPDNITRFLILAREPIISGTDRPYKTSIVFTLEEGPGVLFKALAVFALREINLTKIESRPQKKRPLRVVDDSNKGSAKYFDYLFYIDFEASMADPRAQYALEHLQEFARFIRVLGCYPMDKNL	At1g11790	XP_004232706.1	3	7	2	0.245	0.00157989	2	0	2	13.1.6.3.1	amino acid metabolism.synthesis.aromatic aa.phenylalanine.arogete dehydratase / prephete dehydratase	M	41	3	-	Cp	Cp	Cp	90.6	plastid stroma	plastid	-
	Solyc03g094175	-	Pterin-4-alpha-carbinolamine dehydratase (AHRD V1 *-** B6T9C1_MAIZE); contains Interpro domain(s) IPR001533 Transcriptional coactivator/pterin dehydratase; RuBisco Assembly factor	MAAATHLSFSPPISVSSLPLRKPNFVTPNLQTSQSRICTRIRCNTNLLGDFGARDPFPAEVESKFGEKVLGNPDtheKILIPAASALSLANQECTDISPNQTPLSEFEAKQLLFKVVGWRIANEDGVLKLQCTWKLKDFDCGVELINRIGKVVEGTGHLPTLHQLQQSNQVHAELWTPSIGGLSMNDFIIAAKIDQVKTSDLVPRKRVWA	At5g51110	XP_004253324.1	5	15	5	4.623	0.0139417	3	3	6	35.2	not assigned.unknown	Cp	58	1	Cp	Cp	Cp	Cp	99.94	plastid stroma	plastid	-
	Solyc04g051860	SK1	Shikimate kinase (AHRD V1 **** B9VU88_VITVI); contains Interpro domain(s) IPR000623 Shikimate kinase	MEARVSQSLQLSSWINSDKVVRKPSGLLRFSEKWNEKPRHRVVVSCHLQPRKAAHSDrRNAVQLKVSCSPQNVQASVLESGCFSASIDEIETLKNKAEEVEEYLDGRCVYLVGMMGCGKTTVGRILAETLGYSFFDCDRLIEQAVGGITVAEIFELRGESFFRDNETEVLHKLSLMHRLVVSTGGGAVVRPINWRHMHKGISVWLDVPLEALAKRITTEGTKSRPLLHEESGDVYDTTLKRLTTLMETRGENYANASARVSLENIALKREKDVCHITPAEITLEVLIQIENFLKTQKSVVVL	At2g21940	NP_001234112.1 Schmid et al 1992	3	9	3	0.468	0.00301791	4	0	4	13.1.6.1.5	amino acid metabolism.synthesis.aromatic aa.chorismate.shikimate kinase	Cp	29	1	-	Cp	Cp	Cp	99.8	-	-	-
	Solyc02g094420	SK-like	Shikimate kinase-like (AHRD V1 ***- B9N0W2_POPTR); contains Interpro domain(s) IPR000623 Shikimate kinase	MKVVQLAQPFVVPTFCHHLKPPRAVSKHNHDFTISLTLKRKAAEISPDLKGTCLFLVGINSSIKSNSAQLLADALRYYYFDSDSVVEQALGGKDAVRSFMKTDLKGFRDSETEVLKQLSSMGRLVVCAGNGAVQCAANLALMRHGISIWIDVPLDMVAKQIVEEKFQLPAAEAINGSYSEVLTQLTAIYEDSRNGYATADTTIALQNTASRLGYDTLDAVTTEDMVLETLKEVERLMRSKKLMEEAARPF	At3g26900	XP_004245946.1	5	10	5	1.61	0.0103821	5	3	8	13.1.6.1.5	amino acid metabolism.synthesis.aromatic aa.chorismate.shikimate kinase	M	106	5	-	-	Cp	Cp	100	plastid stroma	plastid	-
	Solyc08g076410	SK2-like	Shikimate kinase-like protein (AHRD V1 **-- B9GZJ5_POPTR); contains Interpro domain(s) IPR017447 CS	MASSSSSSSSSVALSFLYQNPIKASLSIPKALSPYSKLTFPSIATFYSAIPRFDYSNFRKINPCLHCSNLPTASTNNTHYEFSDGSSEVELRLELGQGDVTPKDIYVDANESSLAIRVQQSGIVRTLMETSTLYEKIKPAETIWYIDEDQLVISLKKQNSELKWPDIVESWESLSAGITQLLRGTSIYLVGESTEINQRIARELAVGLGYTPLCTKELLETYAKQSMETWVNEEGSDAVAEAESAILESLSSQARAVIATLGGKKGAAGRVNQWRHLFAGFTVWLSLSQATDEESAKEEAKRNMQDSGRGYSNAEVVVKLGGWDPNYSKAVAQAVLSALKRLILADKDLPGKKSLYIRLGCRGDWPDIKPPGWDPSTSLDASSPRS	At2g35500	XP_004245946.1	8	20	8	2.594	0.0167275	5	3	8	13.1.6.1.5	amino acid metabolism.synthesis.aromatic aa.chorismate.shikimate kinase	Cp	72	2	Cp	Cp	Cp	Cp	99.9	plastid stroma	plastid	-
	Solyc01g098550	TSA	Tryptophan synthase alpha chain (AHRD V1 ***- Q8LA83_ARATH); contains Interpro domain(s) IPR002028 Tryptophan synthase, alpha chain	MSFHSYTTVRPYLTPSPSASPLFLHFQVERRFGDGMASFLKATHFIHSSNNHQNHPFSQSYTQTIKISTSRKPLMAALSATATVGLSETFTRLKEQGKVALIPYITAGDPDLATTAEALKVLDRCGSDIIELGVPYSDPLADGPVIQAAASRSLTKGTNFAKVISMLEDVVPQLSCPIALFTYYNPILKRGTEKFMATVRDTGVHGLVVPDVPLEETEMLRKEAARHNIELVLLTTPTTPKIRMKAITEASEGFVYLVSAVGVTGARASVSSKVQSLLLDIKEATSKPVAVGFGISKPEHVKQVAEWGADGVIVGSAMVRILGEAKSPEEGLKELEVFTTSLKSALS	At4G02610	XP_004230160.1	4	19	4	2.162	0.0139417	5	3	8	13.1.6.5.5	amino acid metabolism.synthesis.aromatic aa.tryptophan.tryptophan synthase	M	53	4	Cp	Cp	Cp	Cp	100	plastid stroma	plastid	plastid
	Solyc12g096190	TSB-type2	Tryptophan synthase beta chain (AHRD V1 ***- Q9FFW8_ARATH); contains Interpro domain(s) IPR006316 Tryptophan synthase, beta chain-like	MAVSLPNLFPKGDAYGTKYFEIKTKPSQLKLSFSYRARAKAALNPRSSSVEIPRQWYNLVADLPIKPPPPLHPKTFQPIKPEDLSPLFCDELIKQEASIDQFIDIPEEVLDVYSLWRPTPLIRAKRLEKLLDTPARIYYKYEGGSPAGSHKPNSAVPQAWYNKMGNVKNVVTETGAGQWGSALSFACSLFGLNCEVWQVRASFDQKPYRKMMMQTWGAKVHPSPSDLTEAGRAILQMDPSSPGSLGIAISEAVEVAAKNADTKYCLGSVLNHVLLHQTVignaEECIKQMEDFGETPDVIIGCTGGGSNFAGLAFPFIREKLKGRINPLIRAVEPTACPSLTKGVYAYDYGDTAGMTPLMKMHTLGHDFIPDPIHSGGLRYHGMAPLISHVYELGFMEA…	At5g38530	XP_004253077.1	6	20	6	2.875	0.0185395	5	3	8	13.1.6.5.5	amino acid metabolism.synthesis.aromatic aa.tryptophan.tryptophan synthase	-	-	4	Cp	possibly Cp	not Cp	Cp	100	plastid stroma	plastid	-
	Solyc07g064280	TSB	Tryptophan synthase beta chain 1 (AHRD V1 **** Q0WUI8_ARATH); contains Interpro domain(s) IPR006654 Tryptophan synthase, beta chain	MAFSSPSKIAPPLPKPHRFSSLSQSQIPFKFIKITSLPTKPPAIACVLTGKSMDATAVQRPDSFGRFGKFGGKYVPETLMHALDELETAFNSLATDQDFQKELDGILRDYVGRESPLYFAERLtheYKRPDGEGPMIYLKREDLNHTGAHKINNAVAQALLAKRLGKKRIIAETGAGQHGVATATVCARFGLDCVIYMGAQDMERQALNVFRMRLLGAEVRAVHSGTATLKDATSEAIRDWVTNVETTHYILGSVAGPHPYPMMVREFHAVignaKETRKQSLEKWGGKPDVLVACVGGGSNAMGLFHEFVDDKDVRLIGVEAAGFGLDSSKHAATLTKGEVGVLHGAMSYLLQDEDGQIVEPHSISAGLDYPGVGPEHSFLKDLGRAEYYSITDEEAL…	At5g54810	XP_004244142.1	8	24	1	1.61	0.0103821	3	0	3	13.1.6.5.5	amino acid metabolism.synthesis.aromatic aa.tryptophan.tryptophan synthase	Cp	83	2	Cp	Cp	Cp	Cp	99	plastid	plastid	-
	Solyc10g006400	TSB	Tryptophan synthase beta chain 1 (AHRD V1 **** Q0WUI8_ARATH); contains Interpro domain(s) IPR006654 Tryptophan synthase, beta chain	MAFSSTVSPKHCRLSSAASSSSSFPKFQIPLKINNITPCHSSSKFPPSIVCVLTEKQSMAAQAVDEPAAIQRPDSFGRFGKFGGKYVPETLMHALDELETAFKSLATDEAFQKELDGILRDYVGRESPLYFAERLtheYKRPNGEGPLIYLKREDLNHTGAHKINNAVAQALLAKRLGKKRIIAETGAGQHGVATATVCARFGLECIIYMGAQDMERQALNVFRMRLLGAEVRAVHSGTATLKDATSEAIRDWVTNVETTHYILGSVAGPHPYPMMVRDFHAVignaKETRKQALEKWGGKPDVLVACIGGGSNAMGLFHEFVDDEDVRLIGVEAAGFGVDSGKHAATLTKGEVGVLHGAMSYLLQDEDGQIVEPHSISAGLDYPGVGPEHSFLKDLGR…	At5g54810	XP_004248313.1	8	21	1	1.291	0.00832504	1	3	4	13.1.6.5.5	amino acid metabolism.synthesis.aromatic aa.tryptophan.tryptophan synthase	Cp	60	1	Cp	Cp	Cp	Cp	100	plastid	plastid	-
	Solyc09g011870	-	Arogenate dehydrogenase 2, chloroplastic-like; Prephenate dehydrogenase family protein (AHRD V1 ***- D7KDI5_ARALY); contains Interpro domain(s) IPR016040 NAD(P)-binding domain	MFSLSSIQSNNIQSQSSSSLLFNHHHQHSTISTRFHHHRLLFPLRAQNSDLTTATTNNNYVDLDDNLTRLDKFSKSLSISNIEENTSLNPLLCSNNKLKIAIIGFGNFGQFIAKSFIKQGHVVLAHSRSDYSLIAQSLNVHFFQDPNDLCEQHPDVILLCTSINSLENVIRSLPIQKLKRNTLFVDVLSVKEFPKNIFLQSLPKEFDILCTHPMFGPTSGKDNWKGLPFMYDKVRIGQEESRIKRVNNFINIFVKEGCRMVEMSCSEHDKYAAGSQFITHTIGRMLQRLGTQTTPINTKGYESLLNLMENTTSDSFDLYCGLFMYNNNSMEVLEKLDAALDSLKRELFGQVLQKLEKRVEKGSRLALPTPDFSKKIEKLKVERKELEALS	AT5G34930	XP_004246360.1	1	1	0		0	0	1	1	4.5.2.3	'Amino acid metabolism.shikimate group amino acid biosynthesis.phenylalanine and tyrosine.arogenate dehydrogenase *(ADH)'	Cp	na	2	Cp	possibly Cp	Cp	C	47.6	plastid stroma	plastid	-
Aspartate family of amino acids	Solyc01g009180	MS1	5-methyltetrahydropteroyltriglutamate--homocysteine methyltransferase (AHRD V1 ***- B6UF55_MAIZE); contains Interpro domain(s) IPR006276 5-methyltetrahydropteroyltriglutamate--homocysteine S-methyltransferase (homocysteine to Met biosynthesis CYTOSOL)	MLTVAKKLSSIYMRLVLPTPSSSTFLSFGSSVSVFSPPRGTQFLRLNFRFRTMASHVVGYPRMGPKRELKFALESFWDGKSNSEDLEKVAADLRLSIWKQMADAGIKYIPSNTFSYYDQVLDTTAMLGAVPPRYGWNGGEIGFDVYFPMARGNASVPAMEMTKWFDTNYHYIVPELGPDVKFSYASHKAVSEYKEAKSLGIDTVPVLVGPVSFLLLSKAAKGVEKSFPLLSLIEKILPVYKEVIAELKAAGASWIQFDEPTLVKDLDSHQLQAFSHAYSELESPLSGLNVLIETYFADVPAEAFKTVTSLKCVTALGFDLVRGSKNLDLIKSGFPSEKYLFAGVVDGRNIWANDLAASLSTLQALENVVGKDKLVVSTSCSLLHTAVDLVNETKLDEEI…	At5g17920	XP_004228469.1	9	17	9	0.688	0.00443658	5	3	8	13.1.3.4	amino acid metabolism.synthesis.aspartate family.methionine	Cp	53	3	Cp	M	Cp	Cp	83.2	plastid stroma	plastid	-
	Solyc01g005250	-	Aspartate-semialdehyde dehydrogenase (AHRD V1 ***- B6TWW1_MAIZE); contains Interpro domain(s) IPR005986 Aspartate-semialdehyde dehydrogenase, bacterial	MNTPALSLRHNHFLNGSSALVSGIRLPRSSSSPFRVRMSLQENGPSVAVVGVTGAVGQEFLSVLSDRNFPYRSLKLLASKRSAGKSMKFEERDYTVEELTEDSFDGIDIALFSAGGSISKKFGPLAAQKGTIVVDNSSAFRMDENVPLVIPEVNPEAMAHVKLGSGKGALIANPNCSTIICLMAVTPLHRRAKVKRMVVSTYQAASGAGAAAMEELVQQTREVLEGKEPTCNIFNQQYAFNLFSHNAPVQPNGYNEEEMKLVKETRKIWSDKDVKVTATCIRVPVMRAHAESVNLQFENPLDENTARDILKNAPGIVVVDDRASNRFPTPLEVSNKDDVAVGRVRRDVSQDGDYGLDIFVCGDQIRKGAALNAIQIAEMLL	At1g14810	XP_004228744.1	7	36	7	7.111	0.0458554	5	3	8	13.1.3.6.1.2	amino acid metabolism.synthesis.aspartate family.misc.homoserine.aspartate semialdehyde dehydrogenase	Cp	53	3	Cp	possibly M	Cp	Cp	100	plastid stroma	plastid	-
	Solyc01g005240	AK2	Aspartokinase 2 (AHRD V1 ***- B9RGY9_RICCO); contains Interpro domain(s) IPR001341 Aspartate kinase region	MATLSHFSGVKTPCPSIFKRSVHFPQLDFVATVPFVSAPSKSVKVSCCERVQRLVCKAQATDVNRKETKNESFGEAPDELTCVMKFGGSSVASAERMREVADLILSFPEERPVIVLSAMGKTTNNLLLAGEKAQSCGVSNVSDLQELAFIKELHLRTIDELGVESSTISKHLLELEQLLNGIALMKELTPRAKDYLVSFGECMSTRIFSAYLNKLGVKARQYDAFEMGIITTDDFTNADILEATYPAVAKRLTGDWMSNPAIPIVTGFLGKGWRTCAVTTLGRGGSDLTATTIGKALGLREIQVWKDVDGVLTCDPNIYPRAETVPYLTFDEAAELAYFGAQVLHPQSMRPAREGDIPVRVKNSYNPKAPGTLIVKTRDMSKAVLTSIVLKRNVTMLDI…	At5g14060	XP_004228743.1	10	26	10	1.555	0.0100274	5	2	7	13.1.3.6.1.1	amino acid metabolism.synthesis.aspartate family.misc.homoserine.aspartate kinase	Cp	46	3	Cp	Cp	Cp	Cp	99.5	stroma	plastid	-
	Solyc11g040390	HSDH1	Aspartokinase-homoserine dehydrogenase (AHRD V1 ***- O63067_SOYBN); contains Interpro domain(s) IPR011147 bifunctional aspartokinase/homoserine dehydrogenase I	MAFSSPISPSYSSHLSSKHVKANKTKFSTINKINSFPLIQRSPFLKVDFSSQWERGKSSKFSINAAVTSKEYSLDGALENTQLPKGDCWSVHKFGGTCVGTPERIGNVAEIITADQSERKLVVVSAMSKVTDMMYDLIYKAQSRDDSYITALDAVREKHKLAAVDLLDGDDLASFLSKLQDDVNNLKSMLRAIYIAGHATESFSDFVVGHGELWSAHLLSSAVRKNGVDCKWMDTREVLVVNPTSSNQVDPDYLMSEERLEKWYSKNPSKTIIATGFIATTPQNIPTTLKRDGSDFSAAIMGALLKAHQVTIWTDVDGVYSADPRKVSEAVILKTLSYQEAWEMSYFGANVLHPRTIVPVMQYDIPIVIKNIFNLSAPGTMICRSSGNEYEDGQKLESL…	At1g31230	XP_004250709.1	19	56	16	2.728	0.0175916	5	3	8	13.1.3.6.1.1	amino acid metabolism.synthesis.aspartate family.misc.homoserine.aspartate kinase	Cp	64	1	Cp	Cp	Cp	Cp	100	plastid stroma	plastid	-
	Solyc06g064550	HSDH2	Aspartokinase-homoserine dehydrogenase (AHRD V1 **** O63067_SOYBN); contains Interpro domain(s) IPR001341 Aspartate kinase region	MAFSSSSISPCCSSKFSSNSYLPETYLKAKVKKIDAFNSNTHTFPLLQSINSKWERGELFQFRIRAAVTTEEYLLDGSTENNQLLKGDSWSVHKFGGTCVGNSERIRNVADVIIQDQSEGKLVVVSAMSKVTDMMYDLIHKAQSRDESYLTALDAVLEKHKLTAMDLLDGDELASFLSRIHHDINNLKAMLRAIYIAGHATESFTDFVAGHGELWSAQLLASVVRMSGVESKWMDTREVLVVNPMGSNQVDPDYLKSGERLEKWYSKNPSMTIIATGFIASTPQDIPTTLKRDGSDFSAAIMGALFKARQVTIWTDVDGVYSADPRKVSEAVILERLSYQEAWEMSYFGANVLHPRTIVPVMQYDIPIIIKNIFNLAAPGTRICRSTDNEFVDGQISES…	At4g19710	XP_004241850.1	7	14	4	0.42	0.00270838	5	1	6	13.1.3.6.1.1	amino acid metabolism.synthesis.aspartate family.misc.homoserine.aspartate kinase	Cp	11	3	Cp	Cp	Cp	Cp	100	stroma	plastid	-
	Solyc02g067180	CGS	Cystathionine gamma synthase (AHRD V1 ***- Q6R8F6_SOLLC); contains Interpro domain(s) IPR000277 Cys/Met metabolism, pyridoxal phosphate-dependent enzyme	MAVSSYARAFPSFECRSEPDFSGSLPHPKAGVRFSGKYNSGSNRSQVYGLSSLIYRFPPNFVRQLSIKArRNANCSNIGVAQVVAASWSNNQAGPEFTPAANAVDSSASAAVTSIGITTGDEEVAVVENADCSDQNVQIKGSTGVKYASFLNSDGSVAIHAGERLGRGIVTDAITTPVVNTSAYFFNKTSDLIDFKEKrRNAASFEYGRYGNPTTVVLEEKISALEGAESTLIVASGMCASTVMFLALVPAGGHIVTTTDCYRKTRVFIETILPKMGITATVIDPADMGALELALNQKKVDLFFTESPTNPFLRCVDIELVSKLCREKGALVCIDGTFATPLNQKALALGADLVVHSATKFLGGHNDVLAGCISGPEKLVSVIRNLHHILGGALNPNAA…	At3g01120	NP_001234489.1	11	57	11	3.217	0.0207449	5	3	8	13.1.3.4.1	amino acid metabolism.synthesis.aspartate family.methionine.cystathionine gamma-synthase	Cp	3	3	-	Cp	Cp	Cp	99.8	-	plastid	-
	Solyc10g079720	CBL	Cystathionine gamma-lyase (AHRD V1 ***- C1PDC6_BACCO); contains Interpro domain(s) IPR006238 Cystathionine beta-lyase, eukaryotic	MACSLSLKQPFTSLPTNTTTQGKLPVNFPVTFGCMNGKGILIEKKFQLNCSRDKEMDLTASALIDSAAAECMGEMVELPPRVEAREAKEPSVSTMLMNFSNDFDPYGALSTPLYQTSTFKQPSATENGQYDYTRSGNPTRDALEKLLAELEKADRAFCFTSGMAALAAVTRLVKAGEEIVAGDDIYGGSDRLLSQVVPKAGIVVKRVDTTNLDEVASVIKPRTKLVWLESPTNPRQQICDIRKIAKIAHAHGALVLVDNSIMSPVLSHPLELGADIVMHSATKFISGHSDLMAGVLAVRGESLAKEVYFLQNAEGAGLAPFDCWLCLRGIKTMALRVEKQQENAQKIAEFLSSHPRVKKVNYAGLPNHPGRSLHFSQATGAGSVLSFLTGSLALSKHVA…	At3g57050	XP_004249212.1	8	43	8	1.721	0.0110979	5	3	8	13.1.3.4.2	amino acid metabolism.synthesis.aspartate family.methionine.cystathionine beta-lyase	Cp	49	5	Cp	Cp	Cp	Cp	95.1	plastid	plastid	-
	Solyc01g109850	DAPDC1	Diaminopimelate decarboxylase (AHRD V1 **** D2DKE7_SOYBN); contains Interpro domain(s) IPR002986 Diaminopimelate decarboxylase	MAATHLVSHSPSLHKSLKYPSNASQKLSFFKPNFPLKPISRNLSIRASVSTSEPQTQKFQHCFKKCEDGFLYCEGVKVEDVMETVErRNAPFYLYSKPQITRNVEAYKAALEGLDSIIGYAIKANNNLKILEHLRSLGCGAVLVSGNELKLALGAGFDPTKCIFNGNGKLLEDLVLAAQAGVFVNIDSEFDLDNIVAAARLAGKKVNVLLRINPDVDPQVHPYVATGNKSSKFGIRNEKLQWFLDAVKAHPQELKLVGAHCHLGSTITKVDIFRDAAALMVNYIDEIRSQGFEIDYLNIGGGLGIDYYHAGAILPSPRDLINTVRELVLSRNLNLIIEPGRSLIANTCCLVNRVTGVKTNGTKNFIVIDGSMAELIRPSLYDAYQHIELVSPPPPEAAI…	At3g14390	XP_004230896.1	16	143	16	9	0.0580367	5	3	8	13.1.3.5.5	amino acid metabolism.synthesis.aspartate family.lysine.diaminopimelate decarboxylase	Cp	46	1	Cp	Cp	Cp	Cp	92.5	plastid	plastid	-
	Solyc09g005700	DAPF	Diaminopimelate epimerase family protein (AHRD V1 **** D7LUJ8_ARALY); contains Interpro domain(s) IPR001653 Diaminopimelate epimerase	MAIAAAITVPLTTPTrRNASFSSLSANRNRLSSPFALQSNKLKFVAIQCPSFRVSAVSSMKIEVPENSSSASFLDRKESDFVRFVKYHGLGNDFILVDNRDTTEPKVSPDQAVKLCDRNFGIGADGVIFAMPGVNGTDYTMRIFNSDGSEPEMCGNGIRCLAKFIAELENFHGKKSFTIHTGAGLIVPEIQDDGKVRVDMGEPILKAADVPTKLPPNRDQSVVKSSLDVDGSTWNVTCVSMGNPHCVTFGTAQQDLQVDELKLADIGPKFEHHEMFPARTNTEFVQVFSPTHLKMRVWERGAGETLACGTGACAVVVAAVLEgranaArRNACTVDLPGGPLDIEWSEKDNHIYMTGPAEVVFYGSAPL	At3g53580	XP_004246745.1	10	52	10	7.859	0.0506789	5	3	8	13.1.3.5.4	amino acid metabolism.synthesis.aspartate family.lysine.diaminopimelate epimerase	Cp	51	1	Cp	Cp	Cp	Cp	98.1	plastid stroma	plastid	-
	Solyc01g098380	DAPB1	Dihydrodipicolite reductase family protein (AHRD V1 **** D7LKV2_ARALY); contains Interpro domain(s) IPR011859 Dihydrodipicolite reductase, plant	MWAIIKVPLYINGGGMRYSSSSKNGCNSFVRGRKYSVKMCSAPAQNVEVLVKSKIEPLPIMVNGCTGKMGRAVLEASIAAGLQPVPICFGGPQDEGKTVEAGGKEIIVHGPSDRENLLSSVFEEHPNLIVVDYTLPAAVNDNAELYCKVGVPFVMGTTGGDREKLYKTVVDSKVYAVISPQMGKQVVAFLAAMEIMAEQFPGAFSGYSLQVMESHQASKLDTSGTAKAVISCFENLGVSFDLDKVQLIRDPVQQVEMVGVPEEYLLGHAFHMYHLTSPDGTVSFEFQHNVCGRSIYAEGTVDAILFLAKKVKLKEEKRIYDMIDVLREGNMR	At2g44040	XP_004230153.1	5	19	5	1.512	0.00975016	5	3	8	13.1.3.5.2	amino acid metabolism.synthesis.aspartate family.lysine.dihydrodipicolite reductase	Cp	39	5	Cp	possibly M	Cp	V	32.2	plastid stroma	plastid	-
	Solyc10g083110	DHDPS2	Dihydrodipicolite synthase 2 IPR005263 Dihydrodipicolite synthase subfamily	MRSYEVKNRTFAEDIKALRLITAIKTPYLPDGRFDLEAYDALVNLQIENGAEGVIVGGTTGEGQLMSWDEHIMLIGHTVNCFGGSIKVignaNTGSNSTREAIHATEQGFAVGMHAALHINPYYGKTSIEGMISHFESVLPMGPTIIYNVPSRTGQDVPPRVIQTLAESPNLAGVKECVGNDRVKQYTSNGLVVWSGNDDECHDSRWNADHGAAGVISVTSNLVPGLMHELMFGGKNPALNLKLMPLVEWLFHEPNPIALNTALAQLGVVRPVFRLPYVPLTRAKREAFVKIVKEIGRDNFIGERDVQVLDDDDFVLLGRY	At2g45440	XP_010312218.1	4	13	3	1.31	0.00844756	4	3	7	13.1.3.5.1	amino acid metabolism.synthesis.aspartate family.lysine.dihydrodipicolite synthase	-	-	4	-	-	Cp	C	82.19	plastid	plastid	-
	Solyc03g044660	DHDPS2	Dihydrodipicolite synthase 2 (AHRD V1 **** D7LCJ3_ARALY); contains Interpro domain(s) IPR005263 Dihydrodipicolite synthase subfamily	MSSSITSCCHFYVERAGTTNrRNANATWKSPRAAVIPSIHLPMRSNEVKNRTFAEDIKKLRLITAIKTPYLPDGRFDLEAYDALVNLQIENGVEGVIVGGTTGEGQLMSWDEHIMLIGHTINCFGGSIKVignaNTGSNSTREAIHATEQGFAVGMHAALHINPYYGKTSIEGLISHFDSVLPMGPTIIYNVPSRTGQDIPPHVIQALAKSPNLAGVKECVGNDRVEQYTRNGLVVWSGNDDECHDSRWHHGATGVISVTSNLVPGLMRELMFGGNNPVLNSKLMPLVEWLFHEPNPIALNTALAQLGVVRPVFRLPYVPLTKAKREEFVKIVEKIGRENFIGERDVQVLDDNDFFLVGRY	At2g45440	XP_004234671.1	4	12	4	1.054	0.00679674	5	3	8	13.1.3.5.1	amino acid metabolism.synthesis.aspartate family.lysine.dihydrodipicolite synthase	Cp	30	2	-	Cp	Cp	Cp	100	plastid	plastid	-
	Solyc04g008760	HSK	Homoserine kinase (AHRD V1 **** D2DKF1_SOYBN); contains Interpro domain(s) IPR000870 Homoserine kinase	MAITFQSPMKLSFITSNGFSNPPSLYPINTHFSFGFNLSSVSSKTQTHITIPEPEPVFTSVKSFAPATVANLGPGFDFLGCAVDGVGDFVTLRVDPNVKAGEVSISDISGAGNRLSKDPLSNCAGIAAISVMKMLNIQSVGLSISLEKGLPLGSGLGSSAASAAAAAVAVNEIFGRKLSVDDLVLAGLESETKVSGYHADNIAPSIMGGFVLIRSYDPLELIPLKFPFEKDLFFVLVNPEFEAPTKKMRAVLPSEVTMSHHIWNCSQAGALVAAILQGDSRGLGKALSSDKIVEPrRNAGPLIPGMEGVKKAALKAGAFGCTISGAGPTLVAVTDDEERGREIGERMVEAFMKEGNLKALAMVKKLDRVGARLVSSNSR	At2g17265	XP_004236876.1	9	25	9	4.878	0.0314559	5	3	8	13.1.3.6.1.4	amino acid metabolism.synthesis.aspartate family.misc.homoserine.homoserine kinase	Cp	69	2	Cp	Cp	Cp	Cp	99	plastid	plastid	-
	Solyc06g073280	DAP	LL-diaminopimelate aminotransferase (AHRD V1 **** A8IW39_CHLRE); contains Interpro domain(s) IPR019942 LL-diaminopimelate aminotransferase, plant-related	MAAIQQSLSTSISSSASTFLGQNKLRFRNQNVSMPGKTSGIVRCVATPSTEKTSYKTQVSRNENLAKLQAGYLFPEIArRNARSAHMLKHPDAQIISLGIGDTTEPIPEVITSAMAKRAHELSTLNGYSGYGAEQGEKQLRASIASTYYANVGLEENEIFVSDGAKSDISRLQVLFGSNVSMAVQDPSYPAYVDSSVIMGQTGQFQKDVEKYGNIAYMRCTPENGFFPDLSSVPRTDIIFFCSPNNPTGSAASREQLTKLVQFAKDNGSILVYDSAYAMYICDDSPKSIFEIPGAKEVAIEVSSFSKYAGFTGVRLGWTAIPKALLYSDGFPVAKDFNRIVCTSFNGASNIAQAGGLACLSPDGFKAMMDVVGYYKENTQIIMDTFNSLGYKVYGGKNA…	At4g33680	XP_004241409.1	13	132	13	5.579	0.0359763	5	3	8	13.1.3.5.3	amino acid metabolism.synthesis.aspartate family.lysine.LL-diaminopimelic acid aminotransferase	Cp	43	1	Cp	Cp	Cp	Cp	98.8	plastid stroma	plastid	plastid
	Solyc07g007300	-	Mequinone biosynthesis methyltransferase ubiE (AHRD V1 *-*- A1HNK4_9FIRM); contains Interpro domain(s) IPR013216 Methyltransferase type 11	MATASLSLNHHRYLVQIRGGVSLNSRIRVPTRFSSNGFTSRIRATSAVVAEPELRTPAQDSMEAELFACPICYEPLTRKGPSGFNVPAIYRSGFKCRKCNKSYSSKDIYLDLTVTSGTKQYNEVKPARSELFRSPIVSFLYERGWRQNFNLSGFPGPDEEFKMAQEYFKVAEGGVLVDVSCGSGLFSRKFAKSGAYSRVVALDFSENMLRQCYDFIKNDESIIGSNLALVRADVSRLPFPSGSIDAVHAGAALHCWPSPSNAIAEINRILRSGGVFVGTTFLRVNPSAPTIFRALEQSALRTYSYFTQEEIEDLVTSCGLINYTSKVQSSFIMFSAQKQ	At2g41040	XP_004242718.1	1	1	1	0.122	0.000786719	1	0	1	13.1.3.4.12	amino acid metabolism.synthesis.aspartate family.methionine.homocysteine S-methyltransferase	Cp	43	5	Cp	M	Cp	M	52	plastoglobules	plastid	-
	Solyc07g007310	-	Mequinone biosynthesis methyltransferase ubiE (AHRD V1 *-*- B2GCN0_LACF3); contains Interpro domain(s) IPR013216 Methyltransferase type 11	MATASSSLSLNHHRYLVQIQGGVSLKSRIRVPTRFSSNGFTSRIRATSAVAVEPELRTPAQDVAEAELFACPICYEPLIRKGPSGFNVPAVYRSGFKCRKCNKSYSSKNIYLDLTVTSGTKEYNESKPTGTELFRSPVVSFLYERGWRQSFNRGGFPGPDEEFNMAQDYFKVAEGGVLVDVSCGSGLFSRKFAKSGVYSKVIALDFSENMLRQCYDFIKTDESILSSNLALVRADVSRLPFFSGSVDAVHAGAALHCWPSPSNAIAEINRILRSGGVFVGTTFLRVNPSTPPIFRALQQSATRTYSFFTREEIEDLVTTCGLINYTSKVQGGFIIFSAQKR	At2g41040	XP_004242719.1	1	1	1	0.136	0.000876999	1	1	2	13.1.3.4.12	amino acid metabolism.synthesis.aspartate family.methionine.homocysteine S-methyltransferase	Cp	45	3	Cp	Cp	Cp	Cp	96.9	plastoglobules	plastid	-
	Solyc03g121910	TS1A	Threonine synthase (AHRD V1 **** Q2Q021_SOYBN); contains Interpro domain(s) IPR004450 Threonine synthase	MAASCMLRSSFLSPGLPQLHHQSTSKPNNGIHFFAPIKATATNDAISQQKHRRPADENIREEARRHCSSHNFSARYVPFNAGPTSDEWYSLDEIVYRSRSGGLLDVQHDMDALKKFDGQYWRSLFDSRVGKTTWPYGSGVWSKKEWVLPEIDSDDIVSAFEGNSNLFWAERFGKQFLGMTDLWVKHCGISHTGSFKDLGMTVLVSQVNRLRKMHKPVVGVGCASTGDTSAALSAYCASAGIPSIVFLPANKISMAQLVQPIANGAFVLSIDTDFDGCMQLIREVTAELPIYLANSLNSLRLEGQKTAAIEILQQFDWEVPEWVIVPGGNLGNIYAFYKGFQMCKELGLVDRIPRLVCAQAANANPLYLHYKSGWKDFKPVKANTTFASAIQIGDPVSID…	At4g29840	XP_025886014.1	20	116	5	27.48	0.177205	5	3	8	13.1.3.2.1	amino acid metabolism.synthesis.aspartate family.threonine.threonine synthase	Cp	4	3	Cp	possibly Cp	Cp	Cp	100	plastid stroma	plastid	-
	Solyc06g062840	TS1B	Threonine synthase (AHRD V1 **** Q2Q021_SOYBN); contains Interpro domain(s) IPR004450 Threonine synthase	MAASCMLRSSFLSPNHNLHQQSSPKSNRASFFTPIKATSSTDDAISKSPQLQKHrRNAPADENIREEArRNADVSSHNFSARYVPFNADPNSSEWYPLDEIIYRSRSGGLLDVQHDMDALKKFDGQYWRSLFDSRVGKTTWPYGSGVWSKKEWVLPEIDSDDIVSAFEGNSNLFWAERYGKQFLGMNDLWVKHCGISHTGSFKDLGMTVLVSQVNRLRKMHKPVVGVGCASTGDTSAALSAYCASAGIPSIVFLPANKISMAQLVQPIANGAFVLSIDTDFDGCMQLIREVTAELPIYLANSLNSLRLEGQKTAAIEILQQFEWEVPDWVIVPGGNLGNIYAFYKGFHMCKELGLVDRIPRLVCAQAANANPLYVHYKSGWKDFKPVKANTTFASAIQI…	At4g29840	XP_004241890.1	18	102	3	13.454	0.0867584	4	1	5	13.1.3.2.1	amino acid metabolism.synthesis.aspartate family.threonine.threonine synthase	Cp	36	2	Cp	Cp	Cp	Cp	100	plastid stroma	plastid	-
Branched chain amino acids	Solyc06g053400	IPMS2	2-isopropylmalate synthase 1 (AHRD V1 **** Q30DX9_9BRAS); contains Interpro domain(s) IPR005671 Bacterial 2-isopropylmalate synthase	MASITANHPISGKPLISFRPKNPLLQTQTLFNFKPSISKHSNSSFSIPVVRCSIRRRPEYTPSHIPDPNYVRIFDTTLRDGEQSPGATMTTKEKLDVARQLAKLGVDIIEAGFPASSEADLEAVKLIAKEVGNGVYEEGYVPVICGLARCNKKDIDKAWEAVKYAKKPRIHTFIATSEIHMNYKLKMSRDQVVEKARSMVAYARSIGCEDVEFSPEDAGRSDPEFLYHILGEVIKAGATTLNIPDTVGYTVPEEFGQLIAKIKANTPGVEDVIISTHCQNDLGLSTANTLAGACAGARQLEVTINGIGERAGNASLEEVVMALKCRGEQVLGGLYTGINTQHILMSSKMVEEYSGLHVQPHKAIVGANAFAHESGIHQDGMLKHKDTYEIISPEDIGLN…	At1g74040	NP_001306252.1	15	82	11	9.965	0.0642595	5	3	8	13.1.4.4.1	amino acid metabolism.synthesis.branched chain group.leucine specific.2-isopropylmalate synthase	Cp	51	1	Cp	Cp	Cp	C	96.9	plastid stroma	plastid	plastid
	Solyc08g014130	IPMS2	2-isopropylmalate synthase 1 (AHRD V1 **** Q30DX9_9BRAS); contains Interpro domain(s) IPR005671 Bacterial 2-isopropylmalate synthase	MSSSSSLCSNSVFSYRNNFSIFQSKNVLLPPISSTNNFSFSIKKHYYSTFIRCSISNRRPEYVPSKISDPKYVRIFDTTLRDGEQSPGATMTTKEKLDVARQLAKLGVDIIEAGFPASSEADFESVKLIAEEIGNNTDENGFVPVICGLSRCNKSDIDKAWEAVKYAKKPRVHTFIATSEIHMKYKLKMSREQVVEKARSMVAYARSLGCEDVEFSPEDAGRSDREFLYDILGEVIKAGATTLNIPDTVGYTVPSEFGQLIADIKANTPGIENVIISTHCQNDLGLSTANTLAGACAGARQLEVTINGIGERAGNASLEEVVMALKCRGEQVLGGLYTGINTQHIVPSSKMVEEYSGLQVQPHKAIVGANAFAHESGIHQDGMLKHKDTYEIISPDDVG…	At1g74040	AKI07309.1	14	59	10	4.736	0.0305402	5	3	8	13.1.4.4.1	amino acid metabolism.synthesis.branched chain group.leucine specific.2-isopropylmalate synthase	Cp	52	1	Cp	Cp	Cp	C	99.5	plastid stroma	plastid	plastid
	Solyc05g009030	IMDH	3-isopropylmalate dehydrogenase (AHRD V1 **** B5LAV1_CAPAN); contains Interpro domain(s) IPR004429 Isopropylmalate dehydrogenase	MAASSSSLQFTATPFNQFHSKKVPKHATKWGTIRCSASSPSKSYNITLLPGDGIGPEVISVAKNALQLVSSIEGFEVAFEEMPMGGAALDAVGVPLPDETLNSAKKSDATLLGAIGGYKWDKNEKHLKPETGLLQLREGLQVFANLRPATVLPQLVDASTLKKEVAEGVDLMVVRELTGGIYFGKPRGFSTDKNGQEIGFNTEVYAAYEIERIARIAFETARKRRGKLCSVDKANVLEASMLWRKIVTALASEYPDVELSHMYVDNAAMQLVRNPKQFDTIVTNNIFGDILSDEASMITGSIGMLPSASLGAAGPGLFEPIHGSAPDIAGQDKANPLATMLSAAMLLKYGLGEEKAAQRIEAAVLDTLNRGFRTGDIHSAGHKLVGCKEMGEEVLKSID…	At1g31180	NP_001316379.1	12	106	12	30.623	0.197473	5	3	8	13.1.4.4.3	amino acid metabolism.synthesis.branched chain group.leucine specific.3-isopropylmalate dehydrogenase	Cp	34	1	Cp	possibly Cp	Cp	Cp	100	plastid stroma	plastid	plastid
	Solyc03g044330	ASS2	Acetolactate synthase (AHRD V1 **** D7RPJ7_SOLTU); contains Interpro domain(s) IPR012846 Acetolactate synthase, large subunit, biosynthetic	MAAAASPSPCFSKTLPPSSSKSSTILPRSTFSFHNHPQKASPLHLIHAQHNrRNAGFAVANVVISTTTHNDVSEPETFVSRFAPDEPRKGCDVLVEALEREGVTDVFAYPGGASMEIHQALTRSNIIRNVLPRHEQGGVFAAEGYARATGFPGVCIATSGPGATNLVSGLADALLDSIPIVAITGQVPrRNAMIGTDAFQETPIVEVTRSITKHNYLVMDVEDIPRVVREAFFLAKSGRPGPVLIDVPKDIQQQLVIPNWDQPMRLPGYMSRLPKLPNEMLLEQIVRLISESKKPVLYVGGGCSQSSEELrRNAFVELTGIPVASTLMGLGAFPTGDELSLQMLGMHGTVYANYAVDSSDLLLAFGVRFDDRVTGKLEAFASRAKIVHIDIDSAEIGKN…	At3g48560	XP_004234664.1	9	28	1	2.3	0.0148316	5	3	8	13.1.4.1.1	amino acid metabolism.synthesis.branched chain group.common.acetolactate synthase	Cp	47	1	Cp	Cp	Cp	Cp	100	plastid stroma	plastid	-
	Solyc11g008780	ASS1	Acetolactate synthase small subunit (AHRD V1 ***- Q9SMC2_NICPL); contains Interpro domain(s) IPR004789 Acetolactate synthase, small subunit	MAATATATAAVSQIPLTGMRKNSLLPALINPASPGRTGSRNISFGFKNVLPVNVIASSNGSGSTDNGAVYVARTAPVTPSSPASSRVKSHTISVFVGDESGIINRIAGVFArRNAGYNIESLAVGLNKDKALFTIVVSGTEKVLQQVVEQLNKLVNVWKVEDLSREPQVERELMLIKLNADATTKAEIMWLVDIFRGKIVDISNADHFLTIEVTGDPGKMAAVLRNLSKFGISELARTGKIALrRNAEKMGEDAPFWRFSAASYPDLEEKLPSILNNKSRPIDNGASNDPGGDVYPVESSDEISVNQVLDAHWGYLYDGDLTGIRSHTLSMLVNNAPGVLNLISGVISrRNAGYNVQSLAVGPAETEGLSRITTVVPGTDETIGKLVKQFNKLIDVHEV…	At2g31810	XP_004250085.1	13	47	11	1.829	0.0117943	5	3	8	13.1.4.1.1	amino acid metabolism.synthesis.branched chain group.common.acetolactate synthase	Cp	55	2	Cp	Cp	Cp	Cp	99.7	plastid	plastid	-
	Solyc12g019310	ASS1	Acetolactate synthase small subunit (AHRD V1 **** Q9SMC2_NICPL); contains Interpro domain(s) IPR004789 Acetolactate synthase, small subunit	MAAVSSHSTLNRPSISLYSSISHLGFPHVVRFSTSKPNFTLSNPKTILVSAIKADEKHANENADHSVTTSDSSTVTNVrRNAHTIQVFVGDESGMINRIAGVFArRNAGYNIESLAVGLNKDKALFTIVVSGTERVLQQVMEQLQKLVNVIKVEDLSKEPQVERELMLIKISADPKFRAEVMWLVDIFRAKIVDISNADHSLTIEVTGDPGKMVAVQRNLSKFGIREIARTGKIALrRNAEKMGESAPFWRFSAASYPDLEVAMSANTVAGTTKKTSNGESMSMAEGDVYPVETDGNSGVNQVLDAHWGVLNDEDTSGLRSHTLSMLVNDSPGVLNIVTGVFArRNAGYNIQSLAVGHAEVEGLSRITTVVPGTDESVSKLVQQLYKLVDIHEDSLLYL…	At2g31810	XP_004251994.1	8	28	6	2.36	0.0152185	5	3	8	13.1.4.1.1	amino acid metabolism.synthesis.branched chain group.common.acetolactate synthase	Cp	53	2	Cp	Cp	Cp	Cp	100	plastid	plastid	-
	Solyc03g043880	BCAT	Branched-chain amino acid aminotransferase (AHRD V1 **** Q9SNY9_SOLTU); contains Interpro domain(s) IPR005786 Branched-chain amino acid aminotransferase II	MESGGVLAGLHRNPTCHHLLRPPRAAVNNLLSSSSFTDKRHFSPLPLKFQKQSHFASYSCNCSINDGSAFQVASSASATAELANIDWDNIGFAVMPTDYMYSMKCSQDGNFSKGELQRFGNIELSPASGILNYGQGLFEGLKAYKRHDGNILLFRPEENALRMKMGAERICMPSPSVEQFVEAVKATVLANERWIPPPGKGSLYIRPLLMGSGAILGVAPAPEYTFLIYVSPVGNYFKEGMAPINLLIETEMHRATPGGTGGVKTIGNYAAVLKAQSAAKAKGYSDVLYLDSVNNRYLEEVSSCNVFIVKGNLIATPAIKGTILPGITRKSIIDVALSQGFQVEERQVSVDELLDADEVFCTGTAVVVSPVGSITHLGKRVSYGSDGVGRVSKQLYSTL…	At5g65780	XP_004234645.1	5	14	1	0.833	0.00537162	3	0	3	13.1.4.1.4	amino acid metabolism.synthesis.branched chain group.common.branched-chain amino acid aminotransferase	Cp	75	5	Cp	possibly Cp	Cp	Cp	89	plastid	plastid	-
	Solyc02g091970	BCAT	Branched-chain-amino-acid aminotransferase (AHRD V1 ***- Q9SNY8_SOLTU); contains Interpro domain(s) IPR005786 Branched-chain amino acid aminotransferase II	MEFILQFQKQSHFTSYIGNSAINSGNSFRVASPASDVASELADIDWDNLGFGFMPTDYMYSMKCSQGENFSKGELQRFGNIELSPSAGILNYGQGLFEGLKAYRKHDGNILLFRPEENATRLKMGAERMCMPSPSVEQFVEAVKATVLANERWIPPPGKGSLYIRPLLMGSGAVLGLAPAPEYTFLIYVSPVGNYFKEGLAPINLVVETEMHRATPGGTGGVKTIGNYAAVLKAQSAAKAKGYSDVLYLDCVQKKYLEEVSSCNVFIVKGNLIVTPAIKGTILPGITRKSIIDVAISQGFEVEERQVSVDELLDADEVFCTGTAVVVSPVGSITHQGRRVTYGNDGVGLVSQQLYSALTSLQMGLSEDKMGWIVELK	At5g65780	XP_004231952.1	9	52	5	6.499	0.0419089	5	3	8	13.1.4.1.4	amino acid metabolism.synthesis.branched chain group.common.branched-chain amino acid aminotransferase	-	-	5	-	possibly Cp	Cp	Cp	82.3	plastid stroma	plastid	-
	Solyc11g071280	DAAT	Branched-chain amino acid aminotransferase like protein (AHRD V1 **** Q0WW83_ARATH); contains Interpro domain(s) IPR001544 Aminotransferase, class IV	MPIFFTQKFVKLAKDTMASLPTLTKPISETSFFLPKLINLEFSRSKIRPLTRSNVFKNSNFSSDGQCCPTFDVPLLSCSEVIERMRTSREGYKTKQLYLAMYSSVFGGITTDTAAMVIPMDNADHMVHRGHGVFDTAAIMDGYLYELDQHLDRFLGSATMAKIQIPFDRESIRQILIRTVSVSKCRKGSLRYWFSAGPGDFQLSSSGCHQATLYAIVIKDQSPPNADHNGIKVVTSSIPIKPLQFAVMKSVNYLPNALSKMEAEENDAYAAIWLDGDGFVAEGPNMNVAFVTKEKDLLMPCFDKILSGCTAKRVLVLAENLVKEGKLRGIRVENVSVEDAKRADEMMLIGSGILVRSVVQWDEEIIGNGREGPVTQALLNLILEDMKSGPPTVRVPVPY	At5g57850	NP_001234878.1	5	12	5	1.254	0.00808644	5	2	7	26.26.1	misc.aminotransferases.aminotransferase class IV family protein	Cp	77	5	Cp	M	not Cp	M	75.1	plastid stroma	plastid	-
	Solyc05g053540	DHAD	Dihydroxy-acid dehydratase (AHRD V1 **** A6C1E8_9PLAN); contains Interpro domain(s) IPR004404 Dihydroxy-acid dehydratase	MQASLLSPPLHPTTQKIPSFNIQCRPYHSRLPPTLTIRAAGAPPETTNSTTPSQKLNKFSSRITEPKSQGGSQAILYGVGLSDDDMKKPQIGISSVWYEGNTCNMHLLKLAEAVKEGVQEADMVGFRFNTIGVSDAISMGTRGMCFSLQSRDLIADSIETVMSAQWYDGNIAIPGCDKNMPGTIMAMGRLNRPSIMIYGGTIKPGHFQGHTFDIVSAFQVYGEYVSGGVSDEQRMNVVRNSCPGAGACGGMYTANTMASAIETLGMSLPYSSSTPAEDPLKLDECRLAGKYLLELLKMDLKPRDIITKSSLRNAMVMVMALGGSTNAVLHLIAIARSVGLELTLDDFQKVSDEVPFLADLKPSGKYVMEDVHKIGGTPAVIRHLLELGYLDGDCMTVTG…	At3g23940	XP_004240214.1	15	71	4	5.7	0.0367566	3	2	5	35.1	not assigned.no ontology	Cp	38	2	Cp	Cp	Cp	Cp	67.8	plastid stroma	plastid	plastid
	Solyc12g043020	DHAD	Dihydroxy-acid dehydratase (AHRD V1 **** A6C1E8_9PLAN); contains Interpro domain(s) IPR004404 Dihydroxy-acid dehydratase	MQAHLLSPTIYPATTTTSPLFPKCRTHLRKPPTLTIRASSTETSTPPPQTSTSTDPSQQLNKYSSRITQPKSQGGSQAILYGVGLTDEDMNKPQIGISSVWYEGNTCNMHLLKLAEAVKEGVTEAGMVGFRFNTIGVSDAISMGTRGMCFSLQSRDLIADSIETVMSAQWYDGNIAIPGCDKNMPGTIMAMGRLNRPSIMIYGGTIKPGHFQGHTFDIVSAFQVYGEYVSGAVSDEQRMNVVRNSCPGAGACGGMYTANTMASAIEAMGMSLPYSSSTPAEDSLKLDECRLAGKYLMELLKMDLKPRDIITKKSLRNAMVVVMALGGSTNAVLHLIAIARSVGLELTLDDFQKVSDEVPFLADLKPSGKYVMEDVHKIGGTPAVIRHLLELGYMDGDCM…	At3g23940	NP_001311413.1	14	81	3	11.743	0.075725	5	2	7	35.1	not assigned.no ontology	Cp	71	2	Cp	possibly Cp	Cp	Cp	71.9	plastid stroma	plastid	plastid
	Solyc03g005730	IIL1	3-isopropylmalate dehydratase large subunit 2 (AHRD V1 ***- B6U6T6_MAIZE); contains Interpro domain(s) IPR011826 Homoaconitase/3-isopropylmalate dehydratase, large subunit, prokaryotic	MAASSAIASSSTTFINKKDVGLSAFSSQASFSVQTARKRISKRIVSVMTPQQTERKPATTGSVKTGMTMTEKILAKASDKPDVSPGDNVWVNVDVLMTHDVCGPGSIGIFKKEFGQNAKVWDREKLVIIPNADHYIFTTDERANRNVDILRDFCNEQNIKYFYDIKDLGNFRANPDYKGVCHVALAQEGHCRPGEVLLGTDSHTCTAGAFGQFATGIGNTDAGFVLGTGKILLKVPPTLRFVMDGEMPDYLLAKDLILQIIGEISVAGATYKAMEFVGTTVESLTMEERMTLCNMVVEAGGKNGVIPADKTTYDYLEGRTSVPYEPVYSDEGARYLKEYRFDVSKLEPLVAKPHSPDNRALARECKDVKIDRVYIGSCTGGKTEDFMAAAKVFLASGKK…	At4g13430	XP_004234053.1	12	93	9	3.262	0.0210351	5	3	8	16.5.1.1.1.3	secondary metabolism.flavonoids.chalcones	Cp	46	1	Cp	Cp	Cp	Cp	83.4	plastid stroma	plastid	-
	Solyc06g060790	IIL3	3-isopropylmalate dehydratase small subunit (AHRD V1 ***- Q9ZW85_ARATH); contains Interpro domain(s) IPR011827 3-isopropylmalate dehydratase, small subunit, subgroup	MAASTAVSSSITTFKSSSFQPRASSMNPLPSVKFPSISSHNPLISHSVSAPKNYTVAPLRSAAASTTPETTKTATTFHGLCYVLGDNIDTDQIIPAEYLTLVPSNPDEYKKLGSYALCGLPSSYQTRFVEPGELTSKYSIVignaGDNFGCGSSREHAPVALGAAGVSAVVAESYARIFFRNSVSTGEVYPLESEKRICEECKTGDVVTVEIGESRLINHTTGKEYKLKPIGDAGPVIEAGGIFAYARKAGMISAREA	At2g43090	XP_010322896.1	7	28	7	3.125	0.0201516	5	3	8	16.5.1.1.1.4	secondary metabolism.flavonoids.chalcones	Cp	60	1	Cp	Cp	Cp	Cp	100	plastid stroma	plastid	plastid
	Solyc07g053280	At3g58610-like1	Ketol-acid reductoisomerase (AHRD V1 ***- D6QSY0_CATRO); contains Interpro domain(s) IPR016206 Ketol-acid reductoisomerase, plant	MAAAAATSFSITTSTPPSSSASSTKSLKPSLVGNLGFLSSSTPSLKPLRAQAAVSSSSSNSGGGALAARMVAAPATVKAPASFDFETSVFKKEKVTLAGNDEYIVRGGRDLFKYLPDAFKGIKQIGVignaWGSQGPAQAQNLRDSLAEIKSDIVVKIGLRKGSSSFAEARTAGFTEENGTLGDIYETISGSDLVLLLISDAAQADNYEKVFSHMKPNSILGLSHGFLLGHLQSMGLDFPKNISVIAVCPKGMGPSVrRNALYVQGKEVNGAGINSSFAVHQDIDgranaTDVALGWSVALGSPFTFATTLEQEYKSDIFGERGILLGAVHGVVESLFrRNAYTENGMNEELAYKNTVECITGVISKTISTKGMLAVYDSLTEEGKKEFEAAYSASFYP…	At3g58610	XP_004243410.1	17	119	12	20.544	0.132478	5	3	8	13.1.4.1.2	amino acid metabolism.synthesis.branched chain group.common.ketol-acid reductoisomerase	Cp	67	1	Cp	Cp	Cp	Cp	99.5	plastid stroma	plastid	plastid
	Solyc12g010840	At3g58610-like2	Ketol-acid reductoisomerase (AHRD V1 ***- D7LW57_ARALY); contains Interpro domain(s) IPR016206 Ketol-acid reductoisomerase, plant	MATPATTSFAISTSSSSAVSSSSKSLKRALSSNLGFLSTSSLSLKALRAKSYSYNVSSSGGPLSVRMVAAPAAVKAPMSLDFETSVFKKEKVTLSGHDEYIVKGGRDLFKLLPDAFKGIKQIGVignaWGSQGPAQAQNLRDSLAEANSDIVVKIGLRKGSRSFAEARAAGFTEENGTLGDLYETISGSDLVLLLISDAAQADNYEEVFSHMKPNSILGLSHGFLLGHLQSLDLDFPKNISVIAVCPKGMGPSVrRNALYVQGKEINGAGINASFAVHQDIDgranaTDVALGWSVALGSPFTFATTLEQEYRSDIFGERGILLGAVHGIVESLFrRNAYTENGMSEELAYKNTVECITGNISRTISTKGMLALYNSLDAEGKKVFATAYSASYYPCME…	At3g58610	XP_004251800.1	18	189	13	34.481	0.222351	5	3	8	13.1.4.1.2	amino acid metabolism.synthesis.branched chain group.common.ketol-acid reductoisomerase	Cp	71	1	Cp	Cp	Cp	Cp	99.8	plastid stroma	plastid	plastid
	Solyc09g008670	OMR1A	Threonine dehydratase 2; Threonine ammonia-lyase biosynthetic (AHRD V1 **** B1XNT1_SYNP2); contains Interpro domain(s) IPR000634 Serine/threonine dehydratase, pyridoxal-phosphate-binding site IPR005787 Threonine dehydratase I	MEFLCLAPTRSFSTNPKLTKSIPSNADHTSTTSRIFTYQNMRGSTMRPLALPLKMSPIVSVPDITAPVENVPAILPKVVPGELIVNKPTGGDSDELFQYLVDILASPVYDVAIESPLELAEKLSDRLGVNFYIKREDKQRVFSFKLRGAYNMMSNLSREELDKGVITASAGNHAQGVALAGQRLNCVAKIVMPTTTPQIKIDAVRALGGDVVLYGKTFDEAQTHALELSEKDGLKYIPPFDDPGVIKGQGTIGTEINRQLKDIHAVFIPVGGGGLIAGVATFFKQIAPNTKIIGVEPYGAASMTLSLHEGHRVKLSNVDTFADGVAVALVGEYTFAKCQELIDGMVLVANDGISAAIKDVYDEGRNILETSGAVAIAGAAAYCEFYKIKNENIVAIASG…	At3g10050	NP_001296095.1	20	266	20	18.055	0.116428	5	3	8	13.1.4.5.1	amino acid metabolism.synthesis.branched chain group.isoleucine specific.threonine ammonia-lyase	Cp	36	2	Cp	Cp	Cp	Cp	99.9	stroma	plastid	-
	Solyc10g083760	OMR1B	Threonine dehydratase biosynthetic (AHRD V1 ***- D9SD66_9PROT); contains Interpro domain(s) IPR000634 Serine/threonine dehydratase, pyridoxal-phosphate-binding site IPR005787 Threonine dehydratase I; ; L-O-METHYLTHREONINE RESISTANT 1, OMR1	MEVLRFTAVKSLNSCVRPEFTAMSSVIVPISTVKVSGTRKSKKKALICAKATEILSSPATVTEPLKAEPAEAPVPLLRVSPSSLQCEPGYLLPNSPVLGTGGVTGYEYLTNILSSKVYDVAYETPLQKAPKLSERLGVNVWLKREDLQPVFSFKIRGAYNMMAKLPKEQLEKGVICSSAGNHAQGVALSAQRLGCDAVIVMPVTTPDIKWKSVKRLGATVVLVGDSYDEAQAYAKKRAESEGRTFIPPFNADHPDVIVGQGTVGMEINRQLKDNIHAIFVPVGGGGLIAGIAAYLKRVAPDIKIIGVEPLDANALALSLHHGQRVMLDQVGGFADGVAVKVVGEETYRLCEELIDGVVLVGRDAICASIKDMFEEKRSILEPAGALALAGAEAYCKYYG…	At3g10050	NP_001234234.1	8	22	6	1.031	0.00664842	5	3	8	13.1.4.5.1	amino acid metabolism.synthesis.branched chain group.isoleucine specific.threonine ammonia-lyase	Cp	39	5	Cp	-	Cp	Cp	100	stroma	plastid	-
	Solyc07g064600	RIDA	Reactive Intermediate Deaminase A, chloroplastic (branched chain amino acid biosynthesis)	MAFAVAPGSFCMPAMAANAGHNRTPMAIGIGRVSVANSRVPFVCLASTGKKEEISTDKAPAAVGPYSQGIKANNFIYVSGSLGLIPETGELISDNVEDQTEQALKNIGEILKAGGVSYSAAVKTTIMLADLGDFQKVNAIYAKYFPDPAPARSTFQAAGLPLNAKIEIDCIAVC	At3g20390	NP_001266269.1	6	25	6	3.642	0.0234855	4	3	7	27.1.19	RNA.processing	Cp	45	2	Cp	Cp	Cp	Cp	94.8	thylakoid-peripheral-stromal-side plastid stroma	plastid	plastid
	Solyc10g006290	RIDA	Reactive Intermediate Deaminase A, chloroplastic (branched chain amino acid biosynthesis)	MTWAAAAASRFQIPAMDVAALRRRAPVVFGVGCVSIAGAKFCGSSSARSKPFACLSISTDASIKEAVHTEKAPAALGPYSQAIKANNFVFVSGCLGLIPETGKFVSESVEDQTEQVLKNMGEILKASGVSYSSVVKTTILLADLNDFKKVNEIYAKYFQAPAPARATYQVAALPMNARIEIECIAAL	At3g20390	NP_001234510.1	10	36	10	3.217	0.0207449	5	3	8	27.1.19	RNA.processing	M	33	5	Cp	Cp	Cp	M	56.3	thylakoid-peripheral-stromal-side plastid stroma	plastid	plastid
Central amino acid metabolism	Solyc08g041870	AAT	Aspartate aminotransferase (AHRD V1 **** Q2XTE6_SOLTU); contains Interpro domain(s) IPR000796 Aspartate/other aminotransferase	MASTMFSLASVTPSASISLQDNLKPKLKIGTSSQRAFPGKDFMKAKSNGRTTMAVAVNVSRFEGITMAPADPILGVSEAFKADTNELKLNLGVGAYRTEDLQPYVLNVVKKAENLILERGENKEYLPIEGLAAFNKVTAELLFGKDNPVLQQQRVATIQGLSGTGSLRIAAALIERYFPYSKILISSPTWGNHKNIFNDARVPWSEYRYYDPKTVGLDFAGMIEDIKAAPEGSFILLHGCAHNPTGIDPTPEQWKKIADVIQKKNHIPFFDVAYQGFASGSLDEDASSVRMFAARGMELLVAQSYSKNLGLYGERIGAINVLCSSADAATRVKSQLKRLARPMYSNPPIHGAKIVANVVGTPELFSEWKEEMEMMAGRIKSVRQKLYDSLSAKDKSGKN…	At4g31990	XP_004244943.1	20	104	19	7.577	0.0488604	5	3	8	13.1.1.2.1	amino acid metabolism.synthesis.central amino acid metabolism.aspartate.aspartate aminotransferase	Cp	55	2	Cp	Cp	Cp	Cp	97.6	plastid stroma	plastid	plastid
	Solyc04g054710	PAT	Bifunctional aspartate aminotransferase and glutamate/aspartate-prephenate aminotransferase	MTAASSSSLLGSSRIGSGPTISGLHSDSLNPTSISFSSNLQGLSLRSSGAKRQLYSRGTGSVVIAQNMDRVEVDLSLSPRVNSVKPSKTVAITDQATALVQAGVPVIRLAAGEPDFDTPAPIAEAGINAIREGHTRYTPNAGTMELRSAICHKLKEENGLSYTPDQIVVSNGAKQSIVQAVLAVCSPGDEVLIPAPYWVSYPEMARMADAMPVILPTSISEDFLLDPKLLESKLTEKSRLLILCSPSNPTGSVYPRKLLEEIAEIVARHPRLLVISDEIYEHIIYAPATHTSFASLPGMWDRTLTVNGFSKAFAMTGWRLGYIAGPKHFVSACNKLQSQFTSGASSISQKAAVAALGLGYAGGEAVATMVKAFRErRNADFLVKSFGEIDGVkinaseP…	At2g22250	NP_001234609.1	8	48	8	4.275	0.0275674	5	3	8	13.1.1.2.1	amino acid metabolism.synthesis.central amino acid metabolism.aspartate.aspartate aminotransferase	Cp	80	1	Cp	Cp	Cp	Cp	98.5	plastid	plastid	-
	Solyc03g121720	GLYR2	Succinic semialdehyde reductase isofom2	MAMCSTFCPRLSFHLNCKKSLSLFPVKHRFFVTIKAFSSQTSAPKADDLPASIGFLGLGIMGNPMAQNLIKAGCDVTVWNRTKSKCEPLISLGAKYKSSPEEVAASCDVTFAMLADPESAADVACGKYGAAKGMGPGKGYVDASTVDGETSKLICEHIRATGAHFLEAPVSGSKKPAEDGQLIFLTAGDSVLYDKAAPLLDIMGKSRFYLGEVGNGAAMKLVVNMVMGSMMASFAEGLVLSEKVGLDPSVLVEVISQGAISAPMYAVKGPSMVKSSYPTAFPLKHQQKDLRLALGLAESVSQPIPIAAATNELYKVAKSHGLSDQDFSASLPGKLVCIMLYIHRDMLNLLGSKLMFSLLAHFKGFHMYYLLSHFFQNLSGIC	At1g17650	BAG16486.1	5	35	5	1.336	0.00861522	5	3	8	13.1.1.1.4	amino acid metabolism.synthesis.central amino acid metabolism.GABA.gamma-hydroxybutyrate NADH	Cp	35	5	Cp	Cp	Cp	M	100	plastid stroma	plastid	-
Glutamate family of amino acids	Solyc08g080370	-	Acetylornithine aminotransferase (AHRD V1 **** D8THT2_VOLCA); contains Interpro domain(s) IPR004636 Acetylornithine and succinylornithine aminotransferase; HopW1-1-Interacting protein 1	MSSSSTFFLTNSFSSVSGSTHLrRNALFNNVRYGSGGGGGGVRIAASLNVEVQAPDLSKEVMDESNKVFVGTYARAPLVLSSGKGCKLYDIEGREYLDLTSGIAVNALGHGDSDWIRAVTEQANVLTHVSNLYYTLPQLELAKRLVANSFADRVFLSNSGTEANEAAIKFARKFQRFSHPDEKQPPVEFIAFSNCFHGRTMGAVALTSKEYYRSPFEPIMPGVTFLEYGNVQAAKELIQSGKIAAVFVEPIQGEGGIYSATQEFLQALRTACDSAGSLLVFDEVQCGLGRTGHLWAHEAYGIYPDIMTLAKPLAGGLPIGAVLVTERVAAAINYGNADHGSTFAGGPLVCNAAVAVLDKISGPGFLASVAKKGQDFKELLVKKLGGNSHVRDVRGVGLI…	At1g80600	NP_001316159.1	9	44	9	2.981	0.019223	5	3	8	13.1.2.3.4	amino acid metabolism.synthesis.glutamate family.arginine.acetylornithine aminotransferase	Cp	43	2	Cp	Cp	Cp	Cp	92.6	plastid stroma	plastid	plastid
	Solyc09g010420	-	Arginine biosynthesis bifunctional protein ArgJ (AHRD V1 ***- B4VHU0_9CYAN); contains Interpro domain(s) IPR002813 Arginine biosynthesis protein ArgJ	MALSVPHFISVSRFSDLNGVKVRGSPRCFRRDCKVFTVISMSKEASNYIPAAPIFLPEGPWQQIPGGVTAAKGFKAAGMYGGLRALGEKPDLALVTCDVDAISAGAFTTNVVAAAPVLYCKSALNASKTARAVLINAGQANAATGDAGYQDVIECSSSLAKLLQLKQDEVLIESTGVignaQRIKKEALLNSLPHLVKQLSPTVEGANSAAVAITTTDLVSKSVAVETEVRGTRIRVGGMAKGSGMIHPNMATMLGVVTTDASVTSDVWRKMVQVAVNRSFNQITVDGDTSTNDAVIALASGLSESHEISSLNSSEAEHLQNCLDAVMQGLAKSIAWDGEGATCLIEVRVDGADNEAEAAKIARSVASSSLVKAAVYGRDPNWGRIACAAGYAGIPFNA…	At2g37500	XP_004246463.1	7	38	7	2.594	0.0167275	5	3	8	13.1.2.3.2	amino acid metabolism.synthesis.glutamate family.arginine.acetylglutamate kinase	Cp	40	4	Cp	Cp	Cp	M	95.9	plastid stroma	plastid	-
	Solyc04g076320	ASL	Argininosuccinate lyase (AHRD V1 **** O23637_ARATH); contains Interpro domain(s) IPR009049 Argininosuccinate lyase	MESLLISSSSSLTTSPIFSSSKHALTPKPQSLSFNSNARLVLFTCAAQQMNSPPSTAATTAEKEVKLWGGRFEESVTDAVEKFTESISFDKALYKQDIMGSKAHASMLAKQGLMSDIDRDTIIKGLEEIERQIEAGEFVWRTDREDVHMNIEAALTDLVGEPAKKLHTARSRNDQVATDFRLWCRDAIDGIISCIKNLQIAMVELALQNEDLIVPGYTHLQRAQPVLLQHLLLAYVEQLERDAGRLLDCRARVNFCPLGACALAGTGLPIDRFMTSDALGFTAPMRNSIDAVSDRDFVLELLSANSITAVHLSRLGEEWVLWASEEFGFLTPSDKVSTGSSIMPQKKNPDPMELVRGKSARVignaDLVSLLVLCKGLPHAYNRDLQEDKEPVFDSVKA…	At5g10920	NP_001316165.1	11	38	11	3.489	0.0224989	5	3	8	13.1.2.3.23	amino acid metabolism.synthesis.glutamate family.arginine.argininosuccinate lyase	Cp	60	1	Cp	Cp	Cp	Cp	49.6	plastid	plastid	plastid
	Solyc05g012270	ASS	Argininosuccinate synthase (AHRD V1 **** B9S599_RICCO); contains Interpro domain(s) IPR001518 Argininosuccinate synthase	MAQVQAISSCSSVNLLFRGSVKSSHRIQDKFWCSKKLGSLQELGVKASEFNGVAIAHSSSSFASPCATHAIQAVLGNDKATTSSTVILEKPLRKKLNKVVLAYSGGLDTSVIVPWLRENYGCEVVCFTADVGQGIKELEGLEAKAKASGACQLVVKDLQEEFVKDYIFPCLRAGAIYERKYLLGTSMARPVIAKAMVDVAREVGADAVSHGCTGKGNDQVRFELTFFALNPELSVVAPWREWEITGREDAIEYAKKHNVPVPVTKKSIYSRDRNLWHLSHEGDILEDPANEPMKDMYMMSVDPQDAPDQPEYVNIGIVAGIPVSVNGKELSPATLLSELNEIGGRHGIGRIDMVENRLVGMKSRGVYETPGGTILFSAVQELESLTLDRETIQVKDSLA…	At4g24830	NP_001316344.1	13	36	13	2.775	0.0178946	5	3	8	13.1.2.3.22	amino acid metabolism.synthesis.glutamate family.arginine.arginosuccinate synthase	Cp	46	2	-	Cp	Cp	Cp	89.4	plastid stroma	plastid	plastid
	Solyc03g116460	-	Aspartate racemase (AHRD V1 ***- D4XDK3_9BURK); contains Interpro domain(s) IPR001920 Asp/Glu racemase	MENSPLDMASKCPDSSVLLTHENAIGIIGGLSIGTTLNFMSKLVTWSSKDGGNSIPFVLCSDPVLNKELSWNERGSISYLTGKNENLLKNADHAPIVENLRHKRIFLEKSGARCIVMPCYVSHSWHHEVALGSSVPILHMGECVAKELKEANLRPLEAGSTLRIGVLASDATLSAGFYQEKLQNEEKLQNEGFEVVLPDKATMEHTVIPSLEALNRKDIEGAQNLFRIALQVLLVRAVNTIIIASDDMRDLLPPDDPLLKKCVDPMDALARSTVKFLQSVEGNA	At1g15410	NP_001307624.1	1	1	1	0.136	0.000876999	1	0	1	13.1.2.3.31	amino acid metabolism.synthesis.glutamate family.arginine.aspartate racemase	-	-	2	-	-	not Cp	Cp	36.8	plastid stroma	plastid	-
	Solyc12g089210	OTC2	Ornithine carbamoyltransferase (AHRD V1 ***- Q9SEX4_CANLI); contains Interpro domain(s) IPR002292 Ornithine carbamoyltransferase	MAAIFSQLSSLCSPENLSFSSVYTLSHSGKQSSQFSGVISPSPVTFPAIRQRISCQTTSSAAAPSSSVIAKGTANQKDFLHINDFDKATILNILDRAREVKELLKSGERTYLPFKGKTMAMIFAKPSMRTRVSFETGFYLLGGHAIYLGPNDIQMGKREETRDVARVLSRYNDIIMARVFAHQDILDLAKYAIVPVINGLTDYNHPCQIMADALTMIEHVGQLEGTKVVYVGDGNNIVHSWLLLAAVIPFHFVCACPKGFEPDQKTVEKAQQAGVSKIEITNDPKEAVREADVVYADVWASMGQKEEAAHrRNAQVFQGFQVDEQLMKLAGKKAYFMHCLPAERGVEVTDGVIEAPNSIVFPQAENRMHAQNAIMLHVLGL	At1g75330	XP_004252793.1	9	88	6	16.783	0.108225	5	3	8	13.1.2.3.21	amino acid metabolism.synthesis.glutamate family.arginine.ornithine carbamoyltransferase	Cp	54	1	Cp	Cp	Cp	Cp	99.1	plastid stroma	plastid	plastid
	Solyc04g080610	OTC1	Ornithine carbamoyltransferase (AHRD V1 **** Q9SEX4_CANLI); contains Interpro domain(s) IPR002292 Ornithine carbamoyltransferase	MAAIFSHLTSLRSPDAVSFSSLSSSGIQSYRFSGVFASFPITFPATSQRVSCQATSPAASPSSSVNVNASQKDFLHITDFDKSTLLNILDRAKEVKELIKSGERTYLPFKGKTMAMIFAKPSMRTRVSFETGFYLLGGHAIYLGPDDIQMGKREETRDIARVLSRYNDIIMARVFAHQDILDLAKYATVPVINGLTDYNHPCQIMADALTIIEHVGQLEGTKVVYIGDGNNIVHSWLLLASVIPFHFVCACPKGFEPDEETVKKAQDAGISKIEITNDPKEAIRGADVVYSDVWASMGQKEEAAQrRNAQVFQGFQVDEELMKIAGRKAYFMHCLPAERGVEVTNGVVEAPNSIVFPQAENRMHAQNAIMLHVMGL	At1g75330	NP_001316345.1	8	47	5	4.08	0.02631	5	2	7	13.1.2.3.21	amino acid metabolism.synthesis.glutamate family.arginine.ornithine carbamoyltransferase	Cp	51	1	Cp	Cp	Cp	Cp	99.8	plastid stroma	plastid	plastid
	Solyc01g108660	-	Probable N-acetyl-gamma-glutamyl-phosphate reductase (AHRD V1 ***- A7WPL0_TOBAC); contains Interpro domain(s) IPR000706 N-acetyl-gamma-glutamyl-phosphate reductase	MASLAALNSNLFNGGCLWKYQDELKVSKAGKLRIRVTSMASSSPAQSLQFADGKANKLDKLRVGVLGASGYTGSEIIRLLRNHPYFQITLMTADRKAGQSIESVFPHLVTQDLPNLVAVKDADFSAVDAVFCCLPHGTTQEIIKSLPTNLKVVDLSADFRLQDIAEYEEWYGQPHKATALQKEAVYGLTEISRREIQSARLVANPGCYPTSVQLPLIPLIKSNFIEVRNIIIDSKSGVSGAGRGAKEANLYTEIAEGIHSYGITRHRHVPEIEQGLSEAANSKVTVSFTPHLMPMSRGMQSTIYVEMAPGMTTQDLKNADHLGNYYEHEEFVVLLKNKEVPHTRHVRGSNYCLMNVFPDRIPGRAIIISVIDNLVKGASGQALQNLNLMMGIPENLGLG…	At2g19940	NP_001306256.1	9	66	9	5.661	0.0365051	5	3	8	13.1.2.3.3	amino acid metabolism.synthesis.glutamate family.arginine.N-Acetylglutamate-5-P reductase	M	104	5	-	Cp	Cp	M	80.7	plastid stroma	plastid	-
Histidine	Solyc05g056150	HIS-N4	1-(5-phosphoribosyl)-5-((5-phosphoribosylamino)methylideneamino)imidazole-4-carboxamide isomerase (AHRD V1 **** D7G369_ECTSI); contains Interpro domain(s) IPR011858 Phosphoribosylformimino-5-aminoimidazole carboxamide ribotide isomerase, eukaryotic	MQTSASSLHNLFLGKNLSYAPPYTLSRALDFIPAMASSSVGPQRLSVQCGVGFRPCIDIHKGKVKQIVGSTLRDSKEADTSLVTNFESDKSAAEYAKLYRDDGLDGGHVIMLGADPLSIAAATEALHAYPGGLQVGGGIKTENALSYIEEGASHVIVTSYVFNNGQMDLERLKELSSLVGRKRLVLDLSCRKKEGEYVIVTDRWQKFSDVHLNEKVLNFLAEYADEFLVHGVDVEGKKLGIDEELVALLGKYSPIPVTYAGGVTGMADLEKIKVAGMGRVDVTVGSALDIFGGNLAYKDVVAWHALQDSLAV	At2g36230	XP_010321316.1	4	20	4	1.512	0.00975016	5	3	8	13.1.7.3	amino acid metabolism.synthesis.histidine.phosphoribosyl-AMP cyclohydrolase	Cp	33	5	Cp	-	Cp	Cp	99.9	-	plastid	-
	Solyc01g103750	HIS-N1B	ATP phosphoribosyltransferase (AHRD V1 **** O46887_THLGO); contains Interpro domain(s) IPR001348 Histidine biosynthesis HisG: ATP phosphoribosyltransferase	MTAIQTFFLQGSVSTLLSSQSSVTSCRKVSVKFTVSCCSATSPLAVVNGNVEKRPSDRTEVRIGLPSKGRMAADSLDLLKDCQLSVRQVNPRQYVAEIPQIPNLEVWFQRPKDIVRKLVAGDLDLGIVGLDTVCEYGQGDEDLIIVHDALEYGDCRLSLAIPKYGIFENVNSMKELAEMSQWTPERPLRVATGFTYMGPKFMKENGLKHVTFSTADGALEAAPAMGIADAIVDLVSSGTTLRENNLKEIEGGVIVQSQAVLVAGRKSLMQRKGALDITHEMLERLEAHLRAVGQFTVTANMRGSSAEEVAERILSQTSLSGLQGPTISPVFCKHDGRVTANYFAIVICVPKKALYKSVQQLRAIGGSGVLISPLTYIFDEETPRWRQLLSTLGL	At1g09795	XP_004230464.1	9	48	9	7.577	0.0488604	5	3	8	13.1.7.1	amino acid metabolism.synthesis.histidine.ATP phosphoribosyl transferase	Cp	37	2	Cp	Cp	Cp	Cp	53.8	plastid stroma	plastid	-
	Solyc02g071890	HIS-N8	Histidinol dehydrogenase IPR012131 Histidinol dehydrogenase, prokaryotic-type	MKSYKLSELTTSEVDSLKARPRIDFSSIFGTVQPIVDDVRNRGDAAVKDYTSRFDKVVLDKIVEDVSELPDPELDSSVREAFDVAYNNIYAFHAAQKPVEKVVENMHGVRCKRVARSIASVGLYVPGGTAVLPSTALMLSVPAQIAGCKTVVLATPPSRDGSICKEVLYCAKKAGVTHILKAGGAQAISAMAWGTESCPKVEKIYGPGNQYVTAAKMILQNSEAMVSIDMPAGPSEVLVIADKHSSPVHVAADLLSQAEHGPDSQVVLVIAGDGVDLIQEEIMKQCQALPRGEFALKALSHSFTVLARDMLEAISFSNMYAPEHLIINVDEAEKWENLIEGSVFMGKWTPESVGDYASGTNHVLPTYGYARMYGGVSLDSFLKYITVQSLTEEGLRNLG…	At5g63890	NP_001308679.1	12	43	12	6.079	0.0392005	5	3	8	13.1.7.9	amino acid metabolism.synthesis.histidine.histidinol dehydrogenase	-	-	2	-	-	Cp	C	95.76	plastid stroma	plastid	plastid
	Solyc04g009350	HIS-N6A	Histidinol-phosphate aminotransferase (AHRD V1 **** B6TRS1_MAIZE); contains Interpro domain(s) IPR005861 Histidinol-phosphate aminotransferase	MGVIELCNISSISIVRAKPSSLNEGNRRRRIACMASSVSVQEEESHQQKQGVNGGSFIRTHLLKLSPYQPILPFEVLSTRLGRKPEDIVKLDANENPYGPPPEVNEALGSMKFPYIYPDPESRTLRAALAEDSGLESEYILAGCGADELIDLIMRCILDPGDKIVDCPPTFTMYEFDAAVNGAGVIKVPRNPDFSLDVERITEVVEREKPKCIFLTSPNNPDGSIIDDETLLEILHLPILVILDEAYVEFSGMESKMKWVKKHENLIVLRTFSKRAGLAGLRVGYGAFPRSIIEFLWRAKQPYNVSVAAEVAACAALKNPTYLENVKVALVQERERLFNLLKEVPFLDPYPSYSNFILCKVTSGMDAKKLKEDLATMGVMIRHYNSKELKGYVRVSVGK…	At5g10330	XP_004236831.1	8	21	8	1.818	0.0117234	5	3	8	13.1.7.7	amino acid metabolism.synthesis.histidine.histidinol-phosphate aminotransferase	Cp	34	2	-	Cp	Cp	C	99.8	plastid stroma	plastid	-
	Solyc07g064810	HIS-N3	Imidazole glycerol phosphate synthase subunit hisF (AHRD V1 *-** D2RFM3_ARCPA); contains Interpro domain(s) IPR014640 Imidazole glycerol phosphate synthase HisHF	MEAASFTSASSTTTPFSSYSSTSQSLRFLRYKPNAKPLNYKSSRSFSARASATSADDSVVTLLDYGAGNVRSVRNAIKYLGFDIKDVQTPQDILKAKRLIFPGVGAFAPAMDVLNKKGMAEALCAYIEQDRPFLGICLGLQLLFESSEENGQVKGLGLIPGVVGRFDSSKGIRVPHIGWNALEIAKDTQILDDVGNSHVYFVHSYRAMPSDENREWISSTCKYGDDFIASIQRGNVHAVQFHPEKSGDVGLSVLrRNAFLNPKSGRTQKLVQGNASKLAKRVIACLDVRTNDKGDLVVTKGDQYDVRENTEENEVRNLGKPVDLAGQYYKDGADEVSFLNITAFRDFPLGDLPMLQVLRYASENVFVPLTVGGGIRDFKDANGRYYSSLEVASEYFRSG…	At4g26900	XP_004244100.1	20	65	20	6.279	0.0404902	5	3	8	13.1.7.4	amino acid metabolism.synthesis.histidine.N-5-phosphoribosyl-formimino-5-aminoimidazole-4-carboxamide ribonucleotide isomerase	Cp	49	1	Cp	Cp	Cp	Cp	96.3	plastid stroma	plastid	-
	Solyc10g005930	HIS-N2	Phosphoribosyl-AMP cyclohydrolase (AHRD V1 *-** Q1IX38_DEIGD); contains Interpro domain(s) IPR002496 Phosphoribosyl-AMP cyclohydrolase	MSVSYSPCFQPLKVFPTSNRIRSSGALTLNRRNAVACMKKSHEDTSLEAKVDFLLNADHVKWDDKGLAVAIAQNVDTGAVLMQGFANREALSTTISSRKATFYSRSRSSLWTKGETSNNFINVFDVFLDCDRDSIIYLGKPDGPTCHTGSETCYYTPVDELLKHPEVEKNELALTTLYALESTINQRKAETSSSSNGKPSWTKRLLLDDKLLCSKIRRS	At1g31860	XP_004248357.1	1	4	1	0.468	0.00301791	4	0	4	13.1.7.2	amino acid metabolism.synthesis.histidine.bifunctional phosphoribosyl-ATP diphosphatase and phosphoribosyl-AMP cyclohydrolase	Cp	36	4	Cp	possibly Cp	Cp	Cp	100	plastid stroma	plastid	-
	Solyc09g076020	HIS-N5B	Imidazoleglycerol-phosphate dehydratase (AHRD V1 **** B9RTS0_RICCO); contains Interpro domain(s) IPR000807 Imidazole glycerol-phosphate dehydratase	MFFGQNGAHNRLSHMELSLSHRLFNSSSSLPSLFNSRIKLSQTHLFSLNNHHQKLQFFTGLHHKLAASMEPQTTIPHAFDNGSSITSSETGRIGEVKRTTKETNVHVRINLDGTGVAENNSGIPFLDHMLDQLASHGLFDVHVKATGDIHIDDHHTNEDVALAIGTALLQALGDRKGINRFGDFSAPLDEALVHVSLDLSGRPHLNFDVQIPTQRVGTYDTQLVEHFFQSLVNTSGMTLHIRQLAGKNSHHIIEATFKAFARALRQATEYDLRRGGSVPSSKGVLSRS	At4g14910	XP_004247357.2	1	1	1		0	0	1	1	4.1.2.6	'Amino acid metabolism.glutamate group amino acid biosynthesis.histidine.imidazoleglycerol-phosphate dehydratase'	Cp	na	3	Cp	none	not Cp	N	65	-	-	-	-
Ser-Gly-Cys Group	Solyc01g094790	CYSC1	Bifunctional L-3-cyanoalanine synthase/cysteine synthase 2	MASLSRFLKKRSLDYNNVDLMRAASNRLFSTQLPHTNIKSEVSQLIGKTPMVYLKKVTEGCGAYIAVKQEMFQPTSSIKDRPALAMINDAEKKGLISPEKTTLIEPTSGNMGISMAFMAAMKGYKMVLTMPSYTSMERRVTMRAFGADLILTDPTKGMGGTVKKAYDLLESTPFMLQQFSNPANTQVHFDTTGPEIWEESLGNVDIFVMGIGSGGTVTGVGQYLKSKNPNVKIYGLEPTESNILNGGKPGPHHITGNGVGFKPDILDMDLMEEVLMVSSEDAVNMARELAVKEGLMVGISSGANTVAALRLAQKPENKGKLIVTVHASFGERYLSSVLYQDLRKEAENMQPISVD	At3g61440	XP_004229909.1	6	14	5	1.955	0.0126069	3	0	3	13.1.5.3.1	amino acid metabolism.synthesis.serine-glycine-cysteine group.cysteine.OASTL	M	29	2	-	-	Cp	M	88.44	-	mitochondrion	plastid
	Solyc08g014340	OASC	Cysteine synthase (AHRD V1 **** Q9FS26_SOLTU); contains Interpro domain(s) IPR005859 Cysteine synthase A; O-ACETYLSERINE (THIOL) LYASE ISOFORM C	MASFINNPLTSLCNTKSEANNLFKISPLRAQSLGFSKFNGSRKVAFPSVVCKAVSVPTKSSTEIEGLNIAEDVTQLIGNTPMVYLNTIAKGCVANIAAKLEIMEPCCSVKDRIGFSMIVDAEEKGLISPGKTVLVEPTSGNTGIGLAFIAASRGYKLILTMPASMSLErRNAVILKAFGAELVLTDPAKGMKGAVSKAEEILNNTPDAYILQQFDNPANPKIHYETTGPEIWEDTKGKIDILVAGIGTGGTITGTGRFLKEQNPNIKIIGVEPTESNVLSGGKPGPHKIQGIGAGFIPGNLDQDVMDEVIEISSDEAVETAKQLALQEGLLVGISSGAAALAAIQVGKRPENAGKLIGVVFPSYGERYLSSILFQSIREECENMKPEL	At3g59760	XP_004244764.1	10	196	10	6.743	0.0434824	5	3	8	13.1.5.3.1	amino acid metabolism.synthesis.serine-glycine-cysteine group.cysteine.OASTL	Cp	50	1	Cp	Cp	Cp	Cp	99.2	plastid stroma	plastid	plastid
	Solyc07g066580	STR1	Mercaptopyruvate sulfurtransferase-like protein (AHRD V1 **** C0LIR4_SOLLC); contains Interpro domain(s) IPR001763 Rhodanese-like IPR001307 Thiosulphate sulfurtransferase, conserved site	MASGILSRSLSLLKSSTFLPSTKQPQLFSSKKTFYYQSAPTYFSYKLVASVTCRMNSSRLATFSTQSVSSNEPVVSVDWLHANLKQPHIKVLDASWYMPNEQRNPLQEYQVAHIPGALFFDVDGISDRTTNLPHMLPSEEAFAAAVSALGIENKDGVVVYDGKGIFSAARVWWMFRVFGHDRVWVLDGGLPRWRASGYDVESSASGDAILKASAASEAIEKVYQRQAVAPITFLTKFQPHLVWTLNQVWKNIEETTYQHIDARSKARFDGVAPEPRKGIRSGHVPGSKCIPFSQMLDGSQTLLSNEELKKKFDQEGISLDKPIVTSCGTGVTACILALGLHRLGKTDVPVYDGSWTEWGGHPDVPVSTSEA	At1g79230	NP_001234274.1	6	23	6	1.976	0.0127423	5	3	8	13.2.5.3	amino acid metabolism.degradation.serine-glycine-cysteine group.cysteine	Cp	52	4	Cp	Cp	Cp	C	49.4	-	mitochondrion plastid	-
	Solyc03g112070	PGDH1A	Phosphoglycerate dehydrogenase (AHRD V1 **** D2D316_GOSHI); contains Interpro domain(s) IPR015508 D-3-phosphogylcerate dehydrogenase	MAASPSSTMILSSKSSRASLSWKNQLASTSAFRVSAVTLPrRNASPRQCPRFVVFSMDAKPTVLVAEKLGEAGLKLLKEFANVDCSYNLTPEELCTKISLCDALVVRSGTKVTREIFESSGGRLKVVgranaGVGIDNVDLAAAtheGCLVVNAPTANTVAAAEHGIALLTAMARNVAQADASVKAGKWLRNKYVGVSLVGKTLAVMGFGKVGSEVArRNAAKGLGMHVIAHDPYAPADRARAIGVQLVSFDEALASADFISLHMPLTPATKQILNDETFAKMKKGVRIVNVARGGVIDEEALVRALDAGIVAQAALDVFTVEPPPKDSKLIQHENVTATPHLGASTTEAQEGVAIEVAEAVVGALKGELSATAVNAPMVPAEVLLELKPFVVLAEKLG…	At4g34200	XP_004236276.1	17	92	10	8.12	0.052362	5	3	8	13.1.5.1.1	amino acid metabolism.synthesis.serine-glycine-cysteine group.serine.phosphoglycerate dehydrogenase	Cp	63	2	Cp	Cp	Cp	Cp	70.7	plastid stroma	plastid	-
	Solyc10g049890	PGDH1B	Phosphoglycerate dehydrogenase (AHRD V1 **** D2D316_GOSHI); contains Interpro domain(s) IPR015508 D-3-phosphogylcerate dehydrogenase	MAASASSAINLSIKPSHTSLSWKTHLSSTSALAVSPLSGHRHYPRFVIYAVGDKPTVLVAEKLGEAGVNLLKEFADVDCSYNLTPEELCNKISLCDALIVRSGTKVSREVFESSGGRLKVVgranaGVGIDNVDLAAAtheGCLVVNAPTANTVAAAEHGISLLTAMARNVAQADASVKAGKWLRNKYVGVSLVGKTLAVMGFGKVGSEVArRNAAKGLGMHVIAHDPYAPADRARAIGVELVSFDKAIASADFISLHMPLTPATNKVLNDETFAKMKKGVRIVNVARGGVIDEDALVRALDAGIVAQAALDVFTVEPPKDSKLVQHENVTATPHLGASTMEAQEGVAIEIAEAVVGALNGELAATAVNAPMVPAEVLSELKPFVALAEKLGRLAVQLV…	At4g34200	XP_004248761.1	10	46	2	2.162	0.0139417	2	0	2	13.1.5.1.1	amino acid metabolism.synthesis.serine-glycine-cysteine group.serine.phosphoglycerate dehydrogenase	Cp	59	1	Cp	Cp	Cp	Cp	99.9	plastid	plastid	-
	Solyc03g123830	PGDH2	Phosphoglycerate dehydrogenase (AHRD V1 **** D2D316_GOSHI); contains Interpro domain(s) IPR015508 D-3-phosphogylcerate dehydrogenase	MASIPSPHTARLNSLLSSSSVNHNKPSNLSFLHASSNPSSIKLLHSVSPSISSSSTTVICNVLKTVESADISLSRDLHGVVSTSKPTILVSEKLGEAGLDLLKSFGNVDCSYDLSPQDLCAKISLCDALIVRSGTKVTRDVFEAAQGRLKVVgranaGVGIDNVDLQAATEFGCLVVNAPTANTIAAAEHGIALLTSMARNVAQSDASMKAGKWLRSKYVGVSLVGKTLAIMGFGKVGSEVArRNAAKGLGMHVIAHDPYAPADRARAIGVDLVSFEQAISTADFISLHMPLTPATNKVFNDDTFAKMKNGVRLINVARGGVIDEDALVRALDSGIVAQAALDVFTVEPPPKDSKLVQHENVTVTPHLGASTKEAQEGVAIEIAEAVVGALNGELSATA…	At1g17745	NP_001335290.1	14	71	10	5.19	0.0334678	5	3	8	13.1.5.1.1	amino acid metabolism.synthesis.serine-glycine-cysteine group.serine.phosphoglycerate dehydrogenase	Cp	81	1	Cp	Cp	Cp	Cp	91.4	plastid stroma	plastid	-
	Solyc02g082830	PSAT	Phosphoserine aminotransferase (AHRD V1 **** B9H657_POPTR); contains Interpro domain(s) IPR003248 Phosphoserine aminotransferase	MAMSAATTQSFLLNNKTTRHNYQTLKSATHIATFPSTTTLTSTYKSMSISCSAAASTTTTPLQTPPTTSSDRVFNFAAGPATLPENVLQKAQADLVNWRGSGMSVMEMSHRGKEFLSIIQKAESDLRTLLNISDEYAVLFLQGGATTQFAAIPLNICSPDDAVDYIVTGSWGDKAFKEAAKYSKPNVIWSGKSEKYTKIPNFDSLVQNPDAKYLHICANETIHGVEFKDYPTPLNEKTILVADMSSNFCSKPVDVSKFGIIYAGAQKNVGPSGVTIVIIRKDLIGNAQESTPVMLDYKIHAENNSLYNTPPCYGIYMCGLVFEDLLDQGGLVEVEKKNQKKAQILYDAIDSSNGFYRCPVDKSVRSLMNVPFTLAKPELEAEFVKTAAGEKMVQLKGHR…	At4g35630	XP_004232556.1	11	75	10	5.158	0.0332615	5	3	8	13.1.5.1.2	amino acid metabolism.synthesis.serine-glycine-cysteine group.serine.phosphoserine aminotransferase	Cp	88	3	Cp	Cp	Cp	Cp	93.1	plastid stroma	plastid	-
	Solyc06g076510	PSP	Phosphoserine phosphatase (AHRD V1 **** B6SU38_MAIZE); contains Interpro domain(s) IPR004469 Phosphoserine phosphatase SerB	MERLMSFQANSVHAVSRRQSSVLVPTFSRKISNTRVSVQPIGMVRNSKLFNSVVASVQPIGASAVTPFDNTLPSKEVLDVWHNANAVCFDVDSTVCIDEGIDEFAEFCGAGKAVAEWTARAMNGSVPFEEALAVRLSLINPSLSQLQDFLKRPPRLSPGIDLLVKKLKDNNKDVYLVSGGFRQMINPVASILGIPLENIFANQILFGSNGEYVGFDKNEPTSRRGGKATAVQQIRKAHGYKSLVMIGDGATDLEARMPGGADLFICYGGIQLRESVAAKADWLVFNFKDLINSLV	At1g18640	XP_004241192.1	6	15	6	1.929	0.0124392	5	3	8	13.1.5.1.3	amino acid metabolism.synthesis.serine-glycine-cysteine group.serine.phosphoserine phosphatase	Cp	61	3	Cp	possibly Cp	Cp	C	42.3	plastid	plastid	-
Arginine	Solyc03g115630	CARA	Carbamoyl-phosphate synthase small chain (AHRD V1 ***- B6TJA4_MAIZE); contains Interpro domain(s) IPR006274 Carbamoyl phosphate synthase, small subunit	MDCAARTHSVVFSALFPKNSANSRVFTVKCSSKNLSLDGASSGLVERPWKVADARLVLEDGSIWKAKSFGARGTQVGEVVFNTSLTGYQEIITDPSYAGQFVLMTNPHIGNTGMNFDDEESVQCFLAGLVIRSLSISTSNWRCTATLGDYLAERNIMGIYDVDTRAITrRNALREDGSLIGVLSTENSKSDEELLEMSRTWDIVGVDLISGVSCKSPYQWIDRTGSDWEFNDNGRNKETFNVVAYDFGIKHNILrRNALASYGCKITVVPSTWPASETLKMNPDGVLFSNGPGDPSAVPYAVEAVKELIGEVPVFGICMGHQLLGQALGGKTFKMKFGHHGGNHPVRNLRNGCVEISAQNHNYAVDPESLPDGVEVTHVNLNDGSCAGLASSKMKLMSL…	At3g27740	XP_004235978.1	11	56	11	7.733	0.0498664	5	3	8	23.1.1.1	nucleotide metabolism.synthesis.pyrimidine.carbamoyl phosphate synthetase	Cp	29	2	Cp	-	Cp	Cp	97.5	plastid stroma	plastid	plastid
	Solyc06g075340	CARB	Carbamoyl-phosphate synthase large chain (AHRD V1 **** D7AI57_GEOSK); contains Interpro domain(s) IPR006275 Carbamoyl phosphate synthase, large subunit, glutamine-dependent	MDYCMNRCENAAYRLISSSSSYVLPSSRIYSSRTQLFPWFPHSTYKKSSFLHLQSRPYVFSNTHLQKRVHSIVNEQINDDTVQKGFLGTDKLGKRTDIKKILILGAGPIVignaQACEFDYSGTQACKALREEGYEVILINSNPATIMTDPETADRTYIEPMTPDLVEQVLENERPDALLPTMGGQTALNLAVALAESGVLDKYGVELIGAKLDAIKKAEDRDLFKQAMKNIGIKTPPSGIGNTLEECFEIANNIGEFPLIIRPAFTLGGTGGGIAYNREEFEAICKSGLAASLTSQVLVEKSLLGWKEYELEVMRDLADNVVIICSIENIDPMGVHTGDSITVAPAQTLTDKEYQRLRDYSIAIIREIGVECGGSNVQFAVNPVDGEVMVIEMNPRVS…	At1g29900	XP_004241264.3	27	140	27	5.918	0.0381623	5	3	8	23.1.1.1	nucleotide metabolism.synthesis.pyrimidine.carbamoyl phosphate synthetase	M	15	5	Cp	-	Cp	C	83.2	plastid stroma	plastid	plastid
	Solyc11g005620	NAGK	Acetylglutamate kinase-like protein (AHRD V1 ***- Q949B4_ORYSA); contains Interpro domain(s) IPR011148 N-acetylglutamate kinase	MLAAKTFSLSSPVSKVSNSPDSSLIFPKSIPAIKANRNILSNPFQASCLKTSLESVIAPDVQSYPGATRVKILSEALPFIQKFRGKTIVVKYGGAAMKSEALQASVIADLVLLSCVGMRIVFVHGGGPEINQWLGKLGIKPNFLNGLRVTDASTMEIVSMVLVGKVNKHLVSLINKAGATAVGLSGIDGHLLTARPSPNSEQLGFVGDIASVDPSVLRPLIDNYHIPVIASVAADKTGQSYNINADTAAGELAAALGAEKLLLLTDVAGILEDRNDPGSLVKQIDIKGVKKMTDDGKIAGGMIPKVNCCVRSLAQGVKTASIIDGRLQHSLLLEILTDEGAGTMITG	At3g57560	NP_001306260.1	6	31	6	1.783	0.0114977	5	3	8	23.4.99	nucleotide metabolism.phosphotransfer and pyrophosphatases.misc	Cp	69	2	Cp	possibly Cp	Cp	Cp	98.8	plastid stroma	plastid	-
Miscellaneous or unknown function	Solyc03g117890	ACR11	ACT domain repeats 11	MAVAMASCGSISGVYTNLNAIEKIPISSSVLFRGSFGLDPVQRICLVPKRLAFSESTIIPKASSTAAVEGGSSQDTAVPTPKVIIDLDSDPETTVVEVTFGDRLGALLDTMTALKNLGLNVVKANVYLDSSGKHNKLCITHASTGRKVEDPELLEAIRLTIINNLMEFHPESSSQLAMGEAFGAFQPSQKLDVDIATHIHVYDDGPERSLLCVEAADRPGLIVDLVKIITEINIDVISGEFDTEGLLAKAKFHVSYKNKALIKPLQQVLANSLRYYLRRPTTNESSF	At1g16880	NP_001295218.1	8	118	6	6.017	0.0388007	5	3	8	35.1	not assigned.no ontology	Cp	61	2	Cp	Cp	Cp	Cp	99.7	thylakoid-peripheral-stromal-side; plastid stroma	plastid	plastid
	Solyc06g068670	ACR11	ACT domain protein	MAVAMVSCGIPTSLKLIEKQPVSIPGFFNGSLALNPVQKLHVTPKRLALSGSTIVLKASATAVEDGSSQETAAVPTPKVVIDLDSDPEATIVEVTFGDRLGALLDTMNALKNLGLNVVKANVCLDSSGKHNTFAITKASTGRKVDDPELLEAIRLTIINNMMEYHPESSSRLAMGEAFGVFQPYQKIDVDIATHIHVYDDAPERSLLCVETADRPGLIVDLVKTITDINVDVESGEFDTEGLLAKAKFHVNYKGKALIKPLQQVLANSLRYFLRRPTTEDASF	At1g16880	NP_001295110.1	7	80	5	7.254	0.0467776	5	3	8	35.1	not assigned.no ontology	Cp	59	3	Cp	Cp	Cp	EX	30.3	thylakoid-peripheral-stromal-side; plastid stroma	plastid	plastid
	Solyc11g006970	ACR12	ACT domain-containing protein	MAIASAFCTSLRSAISDADSGVYSPNLPQFAAAKLHSSAAFLTFSNAVVSVSSrRNARYNVSCTLDGVDSLSPVLKDEQGSVSIPLPIVQIIQDPECDATTVEISFGDRLGLLIDTMKALKDLGLDVVKGVVTTQDSVKKTKFLITRLDTGRKVEDPDLLENIRLTIIQNLIKYHPESSERLAMGEAFGIKAPEKKPDVDIATHIHVKDDGPKRSMLYVETADRSGLLMEVIKIMADINIHVESAEIDTEGLIAKDKFYVSYGGAALTRSMSQVLVNCLRYYLrRNAPETDDESY	At5g04740	NP_001295115.1	11	75	11	14.849	0.0957541	5	3	8	13	amino acid metabolism	Cp	60	2	Cp	Cp	Cp	Cp	74.5	plastid stroma	plastid	plastid
A Names of tomato proteins were based on the literature, NCBI annotation (identified in BlastP searches), and/or SolyGenomics descriptor. In a small number of cases, tomato protein names were assigned based on NCBI annotations and the Arabidopsis homolog.
B Some Sol Genomics descriptors were updated when NCBI annotations and Arabidopsis gene annotations were aligned.
C Target P's subcellular locations are: chloroplast (Cp), mitochondria (M), secretory (S), and no predicted location is indicated by a dash (-).
D ChloroP was used to predict the presence of a chloroplast transit peptide (Y) and the lack of a predicted transit peptide is indicated with a dash (-).
E Predotar's predicted subcellular locations were: chloroplast/plastid (Cp),endoplasmic reticulum (ER) or mitochondrion (M). For proteins with localization predictions that were less clear, Predotar provided categorized of possibly Cp, M and ER. Proteins with unresolved locations or that did not have a homolog detected by Predotar are indicated with a dash (-).
F WoLF PSORT's and YLoc's predicted subcellular locations were: chloroplast/plastid (Cp), cytosol (C), cytoskeleton (Cy), endoplasmic reticulum (ER), extracellular (EX), golgi apparatus (G), mitochondrion (M), nucleus (N), peroxisomes (P), plasma membrance (PM), and vacuole (V). Proteins with no chloroplast location in WoLF PSORT are indicated by not Cp.The number of proteins predicted to be in t…

## Sheet: Table S8B.Nitrogen & Sulfur
Table S8B. Nitrogen and Sulfur Metabolism
Category	Gene and protein descriptors						Proteomics					Number times detected			Bin codes		Algorithms								Databases
	Tomato Gene ID	Gene name A	Protein DescriptorB	Protein Sequence	Arabidopis homolog	Tomato protein NCBI accession	Peptides	PSMs	Unique Peptides	emPAI	Mol%	Acetone samples	Gel samples	Total	Bincode	Name	TargetP C ver.1	Transit peptide length	TargetP (reliability class)	ChloroP D	Predotar E	WoLF PSORT F	YLoc F	YLoc % Confidence	PPDB	SUBA4	plprot
Nitrogen metabolism	Solyc03g063560	GLU1	Ferredoxin-dependent glutamate synthase	MAVNSVANVPQLLYGQSPKILTGNKDGLFADFLGFYCKSSKRIRRRIGYAATNRRSLINKKCNAVLDLQRGASNASRQSSDIVPKVADLDDILSERGACGVGFIANLDNKASHGIVKDALVALGCMEHRGGCGADNDSGDGSGLMTSIPWDLFNDWAEKEGIAVFDKLHTGVGMVFLPNDSNQMNEAKKVISNIFNNEGLEVLGWRSVPVDSSVVGYYAKVTMPNIQQVFVRVVKEENVDDIERELYICRKLIERAVNSEIWGNELYFCSLSNQTIVYKGMLRSEVLGRFYYDLQNELYTSPLAIYHRRFSTNTSPRWPLAQPMRFLGHNGEINTIQGNLNWMQSREASLKSAVWRDREDEIRPFGNPKASDSANLDSTAELLIRSGRAPEEALMILVP…	At5g04140	XP_004234830.1	53	691	53	20.8	0.134129	5	3	8	12.2.1.1	N-metabolism.ammonia metabolism.glutamate synthase.ferredoxin dependent	-	-	5	-	Cp	Cp	C	66	plastid stroma	plastid	plastid
	Solyc03g083440	GS1	Glutamate synthase (AHRD V1 **** C1E4G5_9CHLO); contains Interpro domain(s) IPR012220 Glutamate synthase, eukaryotic IPR006005 Glutamate synthase, NADH/DPH, small subunit 1	MPKKRTRVQSSATYPPMSIASSSVLQSKNNGVVMSSPVKSLVGHQLNAMPLGRVGVGLGRTRVTRSSVVKRTTGFEKKFYGAKLRASGPERLHLWQSDGPGRAPKLRVVVRSALSQVPEKPLGLYDPSFDKDSCGVGFVAELSGESSRKTVADAIEMLVRMSHRGACGCETNTGDGAGILVGLPHDFYKEVTSEAGFEIPPPGQYAVGMFFLPTSDSRREQSKIVFTKVAESLGHTVLGWRPVPTDNSGLGKSALQTEPIIEQVFLTPTPRSKVDFERQMYILRRVAMVAIRAALNLQHGGVKDFYVCSLSSRTVVYKGQLKPNQLKEYYFADLGNERFTSYMALVHSRFSTNTFPSWDRAQPMRVLGHNGEINTLRGNVNWMRAREGLLKCKELGLSK…	At5g53460	XP_004234955.1	35	83	35	1.501	0.00967923	5	2	7	12.2.1.2	N-metabolism.ammonia metabolism.glutamate synthase.NADH dependent	Cp	65	3	Cp	-	Cp	M	93.5	stroma	plastid	plastid
	Solyc01g080280	GS2	Glutamine synthetase (AHRD V1 ***- B5LAU9_CAPAN); contains Interpro domain(s) IPR008146 Glutamine synthetase, catalytic region	MAQILAPSAQWQMRMTKSSTDASPLTSKMWSSVVLKQNKRHALKSSAKFRVFALQSDNGTVNRVEQLLNLDVTPYTDKIIAEYIWIGGTGIDMRSKSRTISKPVKDASELPKWNYDGSSTGQAPGEDSEVILYPQAIFKDPFRGGNNILVICDAYTPAGEPIPTNKRHKAAQIFSDPKVAAQVPWFGIEQEYTLLQPNVNWPLGWPVGGYPGPQGPYYCGAGAEKSFGRDISDAHYKACLYAGINISGTNGEVMPGQWEFQVGPSVGIEGGNADHIWCARYLLERITEQAGVVLSLDPKPIEGDWNGAGCHTNYSTLSMREEGGFEVIKKAILNLSLRHKEHISAYGEGNERRLTGKHETASIDQFSWGVANRGCSIRVGRDTEKEGKGYLEDRRPASN…	At5g35630	NP_001310598.1	14	472	14	62.096	0.400427	5	3	8	12.2.2	N-metabolism.ammonia metabolism.glutamine synthetase	Cp	50	2	Cp	Cp	Cp	Cp	91.8	plastid stroma	plastid	plastid
	Solyc01g108630	NIR1	Nitrite reductase (AHRD V1 ***- Q76KB0_TOBAC); contains Interpro domain(s) IPR006067 Nitrite and sulphite reductase 4Fe-4S region	MASFSIKFLAPSLPNPTRFSKSSIVKLNATPPQTVAAAGPPEVAAERLEPRVEEKDGYWILKEQFRQGINPQEKVKIEKEPMKLFMENGIEELAKIPIEEIDQSKLTKDDIDVRLKWLGLFHRRKNQYGRFMMRLKLPNGVTTSAQTRYLASVIRKYGEEGCADITTRQNWQIRGVVLPDVPEILKGLEEVGLTSLQSGMDNVRNPVGNPLAGIDPEEIVDTRPYTNLLSQFITGNSRGNPAVSNLPRKWNPCVVGSHDLYEHPHINDLAYMPAIKDGRFGFNLLVGGFFSAKRCDEAIPLDAWVPADDVVPVCKAILEAFRDLGFRGNRQKCRMMWLIDELGVEGFRAEVVKRMPQQELERASPEDLVQKQWERRDYLGVHPQKQEGYSFIGLHIPVG…	At2g15620	NP_001333834.1	27	179	19	18.307	0.118053	5	3	8	12.1.2	N-metabolism.nitrate metabolism.nitrite reductase	Cp	35	2	Cp	possibly M	Cp	Cp	99.9	plastid stroma	plastid	plastid
	Solyc10g050890	NIR2	Nitrite reductase (AHRD V1 ***- Q76G13_TOBAC); contains Interpro domain(s) IPR006067 Nitrite and sulphite reductase 4Fe-4S region	MTSFSVKFSATSLPNSNRFSKLHATPPQTVAVPSYGAAEIAAERLEPRVEQRDGYWVVKDKFRQGINPAEKAKIEKEPMKLFTENGIEDLAKISLEEIEKSKLTKEDIDIRLKWLGLFHRRKHHYGRFMMRLKLPNGVTTSDQTRYLGSVIRKYGKDGCGDVTTRQNWQIRGVVLPDVPEILKGLDEVGLTSLQSGMDNVRNPVGNPLAGIDLHEIVDTRPYTNLLSQYVTANFRGNVDVTNLPRKWNVCVignaSHDLYEHPHINDLAYMPATKDGRFGFNLLVGGFFSPKRCAEAIPLDAWVPADDVVPVCKAILEAYRDLGTRGNRQKTRMMWLIDELGVEGFRAEVVKRMPQKKLDRESSEDLVLKQWERREYLGVHPQKQEGYSFVGLHIPVGR…	At2g15620	XP_004248736.1	12	96	4	3.642	0.0234855	5	0	5	12.1.2	N-metabolism.nitrate metabolism.nitrite reductase	Cp	48	4	Cp	possibly Cp	Cp	Cp	100	plastid stroma	plastid	plastid
	Solyc06g009400	PII	Nitrogen regulatory protein P-II (AHRD V1 *-*- Q8DLA5_THEEB); contains Interpro domain(s) IPR017918 Nitrogen regulatory protein PII, conserved site IPR002187 Nitrogen regulatory protein PII	MASPSLSKSNFSLHSFSSSPSLSQFPHFTSITVVQPKFFPSQLTFKRCQNAPSFPIIRAQNSPDFVPDAKFYKVEAILRPWRIQQVSSALLKMGIRGVTVSDVRGFGAQGGLTERQAGSEFSEDTFVAKVKMEIVVSKDQVEGVIAKIIEEARTGEIGDGKIFLTPISDVIRVRTGERGEKAERMMGGHADMSSALSTS	At4g01900	NP_001234506.1	9	68	7	4.412	0.0284509	5	3	8	30.1	signalling.in sugar and nutrient physiology	Cp	58	2	Cp	Cp	Cp	Cp	99.2	plastid stroma	plastid	-
	Solyc11g005620	NAGK	Acetylglutamate kinase-like protein (AHRD V1 ***- Q949B4_ORYSA); contains Interpro domain(s) IPR011148 N-acetylglutamate kinase	MLAAKTFSLSSPVSKVSNSPDSSLIFPKSIPAIKANRNILSNPFQASCLKTSLESVIAPDVQSYPGATRVKILSEALPFIQKFRGKTIVVKYGGAAMKSEALQASVIADLVLLSCVGMRIVFVHGGGPEINQWLGKLGIKPNFLNGLRVTDASTMEIVSMVLVGKVNKHLVSLINKAGATAVGLSGIDGHLLTARPSPNSEQLGFVGDIASVDPSVLRPLIDNYHIPVIASVAADKTGQSYNINADTAAGELAAALGAEKLLLLTDVAGILEDRNDPGSLVKQIDIKGVKKMTDDGKIAGGMIPKVNCCVRSLAQGVKTASIIDGRLQHSLLLEILTDEGAGTMITG	At3g57560	NP_001306260.1	6	31	6	1.783	0.0114977	5	3	8	23.4.99	nucleotide metabolism.phosphotransfer and pyrophosphatases.misc	Cp	69	2	Cp	possibly Cp	Cp	Cp	98.8	plastid stroma	plastid	-
Sulfur metabolism	Solyc08g014340	OASC	Cysteine synthase (AHRD V1 **** Q9FS26_SOLTU); contains Interpro domain(s) IPR005859 Cysteine synthase A; O-ACETYLSERINE (THIOL) LYASE ISOFORM C	MASFINNPLTSLCNTKSEANNLFKISPLRAQSLGFSKFNGSRKVAFPSVVCKAVSVPTKSSTEIEGLNIAEDVTQLIGNTPMVYLNTIAKGCVANIAAKLEIMEPCCSVKDRIGFSMIVDAEEKGLISPGKTVLVEPTSGNTGIGLAFIAASRGYKLILTMPASMSLErRNAVILKAFGAELVLTDPAKGMKGAVSKAEEILNNTPDAYILQQFDNPANPKIHYETTGPEIWEDTKGKIDILVAGIGTGGTITGTGRFLKEQNPNIKIIGVEPTESNVLSGGKPGPHKIQGIGAGFIPGNLDQDVMDEVIEISSDEAVETAKQLALQEGLLVGISSGAAALAAIQVGKRPENAGKLIGVVFPSYGERYLSSILFQSIREECENMKPEL	At3g59760	XP_004244764.1	10	196	10	6.743	0.0434824	5	3	8	13.1.5.3.1	amino acid metabolism.synthesis.serine-glycine-cysteine group.cysteine.OASTL	Cp	50	1	Cp	Cp	Cp	Cp	99.2	plastid stroma	plastid	plastid
	Solyc09g082060	CS26	Cysteine synthase	MAGEKTGIAKDVTELIGNTPLVYLNNVVDGCVARVAAKLESMEPCSSVKDRIGYSMITDAEEKGLIKPGESVLIEPTSGNTGVGLAFMAAAKGYKLIITMPSSMSLERRIILRAFGAELVLTDPAKGMKGAISKAEEIRGKTPNSYILQQFENPANPKIHYETTGPEIWKGSNGKVDALVSGIGTGGTITGSGKYLREQNPNIKLYGVEPVESAILSGGKPGPHKIQGIGAGFVPGVLEVNLIDDVVQVSSDESIEMAKLLALKEGLLVGISSGAAAAAAIKVAKRPENAGKLIVVVFPSFGERYLSSVLFETVRREAENMTVEP	At3g03630	NP_001308271.1	3	22	1	0.701	0.00452041	1	3	4	'4.4.2.2'	'Amino acid metabolism.serine group amino acid biosynthesis.cysteine.O-acetylserine sulfydrylase *(OASS)'	-	na	2	-	-	not Cp	C	94.49	plastid	plastid	plastid
	Solyc01g107860	CBX1A	Cystathionine β-synthase (CBS) domain-containing protein-like (AHRD V1 ***- B8AP73_ORYSI); contains Interpro domain(s) IPR000644 Cystathionine beta-synthase, core	MESVLNFNSISPICVLNYRLFPTTLSCSPRPLSGDPAVATSrRNACLSQRKLSRSLPPASLPSTSANAAASTSNSQSPSDGHYSVGDFMTRKEDLHVVKTTTKVGEALEMLVEKRVTGLPVVDDDWKLVGVVSDYDLLALDSISGAGQADTNLFPDVDSTWKTFNEVQKLLSKTNGKVVGDVMTPSPLSVCENTNLEDAARLLLQTKYrRNALPVVDVDGKLVGIITRGNVVRAALQIKRTTDNTN	At4g36910	XP_004230763.1	4	13	4	3.642	0.0234855	4	3	7	17.5.1	hormone metabolism.ethylene.synthesis-degradation	Cp	63	1	Cp	Cp	Cp	Cp	97.9	plastid stroma	plastid	-
	Solyc02g064950	CBX1B	Cystathionine β-synthase (CBS) domain-containing protein-like (AHRD V1 ***- B8AP73_ORYSI); contains Interpro domain(s) IPR000644 Cystathionine beta-synthase, core	MASISPSGVSLHRSSAAFHHQLPCLLLSLPCHKVATFAKCFLSVRLWNSRNHFSVTASNTLTANSVEPRNGVYTVGDFMTRKDDLHVVKPSTSVDEALETLVERRITGFPVVDDDWKLVGLVSDYDLLALDSVSGTGGADANMFPEVGSNWKTFNEVQKLISKTKGKVVGDLMTPAPLVVRESTNLEDAARLLLKTKYRRLPVVDSDGKLVGIITRGNVVRAALHIKRIMEMEGQQ	At4g36910	XP_004233443.1	3	10	1	1.154	0.00744159	5	3	8	17.5.1	hormone metabolism.ethylene.synthesis-degradation	Cp	62	2	Cp	Cp	Cp	M	67.1	plastid stroma	plastid	-
	Solyc02g093140	CBX1C LEJ2	Cystathionine β-synthase (CBS) domain-containing protein-like (AHRD V1 ***- B8AP73_ORYSI); contains Interpro domain(s) IPR000644 Cystathionine beta-synthase, core	MASISPSGSCLHRTPAAFHRQLPCLLLSLPGHILAASTKFYLPLRLSDSRDTFRLASANTLTANSVPPRNGVYTVGDFMTRKEELHVVKPTTSVDEALEALVEHRITGFPVIDDNWKLVGLVSDYDLLALDSVSGTGTADAGIFPEVDSNWKTFNEVQKLLGKTKGKVVGDLMTPAPLVVRESTNLEDAARLLLKTKYrRNALPVVDGKGKLVGIITRGNVVRAALQIKRATEMED	At4g36910	XP_004231863.1	5	10	2	-	-	0	2	2	17.5.1	hormone metabolism.ethylene.synthesis-degradation	Cp	16	3	Cp	Cp	Cp	Cp	86.4	plastid stroma	plastid	-
	Solyc10g079720	CBL	Cystathionine gamma-lyase (AHRD V1 ***- C1PDC6_BACCO); contains Interpro domain(s) IPR006238 Cystathionine beta-lyase, eukaryotic	MACSLSLKQPFTSLPTNTTTQGKLPVNFPVTFGCMNGKGILIEKKFQLNCSRDKEMDLTASALIDSAAAECMGEMVELPPRVEAREAKEPSVSTMLMNFSNDFDPYGALSTPLYQTSTFKQPSATENGQYDYTRSGNPTRDALEKLLAELEKADRAFCFTSGMAALAAVTRLVKAGEEIVAGDDIYGGSDRLLSQVVPKAGIVVKRVDTTNLDEVASVIKPRTKLVWLESPTNPRQQICDIRKIAKIAHAHGALVLVDNSIMSPVLSHPLELGADIVMHSATKFISGHSDLMAGVLAVRGESLAKEVYFLQNAEGAGLAPFDCWLCLRGIKTMALRVEKQQENAQKIAEFLSSHPRVKKVNYAGLPNHPGRSLHFSQATGAGSVLSFLTGSLALSKHVA…	At3g57050	XP_004249212.1	8	43	8	1.721	0.0110979	5	3	8	13.1.3.4.2	amino acid metabolism.synthesis.aspartate family.methionine.cystathionine beta-lyase	Cp	49	5	Cp	Cp	Cp	Cp	95.1	plastid	plastid	-
	Solyc02g067180	CGS	Cystathionine gamma synthase (AHRD V1 ***- Q6R8F6_SOLLC); contains Interpro domain(s) IPR000277 Cys/Met metabolism, pyridoxal phosphate-dependent enzyme	MAVSSYARAFPSFECRSEPDFSGSLPHPKAGVRFSGKYNSGSNRSQVYGLSSLIYRFPPNFVRQLSIKArRNANCSNIGVAQVVAASWSNNQAGPEFTPAANAVDSSASAAVTSIGITTGDEEVAVVENADCSDQNVQIKGSTGVKYASFLNSDGSVAIHAGERLGRGIVTDAITTPVVNTSAYFFNKTSDLIDFKEKrRNAASFEYGRYGNPTTVVLEEKISALEGAESTLIVASGMCASTVMFLALVPAGGHIVTTTDCYRKTRVFIETILPKMGITATVIDPADMGALELALNQKKVDLFFTESPTNPFLRCVDIELVSKLCREKGALVCIDGTFATPLNQKALALGADLVVHSATKFLGGHNDVLAGCISGPEKLVSVIRNLHHILGGALNPNAA…	At3g01120	NP_001234489.1	11	57	11	3.217	0.0207449	5	3	8	13.1.3.4.1	amino acid metabolism.synthesis.aspartate family.methionine.cystathionine gamma-synthase	Cp	3	3	-	Cp	Cp	Cp	99.8	-	plastid	-
	Solyc08g081010	GSH1	Glutamate-cysteine ligase (AHRD V1 **** Q7Y0R4_BRAJU); contains Interpro domain(s) IPR011556 Glutamate--cysteine ligase, plant	MALMSQAGSSHCIYSEKVRCISGHRSIINNMDMFRMREICFGVDISSRNASRRVQGNYLNHIGVGSRRGDLTIVAASPPTEDAVVAAEPLTKEDLVGYLASGCKSKEKWRIGtheEKFGFEFGTLRPMKYDQIADLLNGIAERFDWEKVMEGDKIIGLKQGKQSISLEPGGQFELSGAPLETLHQTCAEVNSHLYQVKAVAEEMGIGFLGTGFQPKWGLKDIPIMPKGRYEIMRNYMPKVGSLGLDMMFRTCTVQVNLDFSSEADMIRKFRAGLALQPIATALFANSPFTEGKPNGYLSKRSHIWTDTDNNRAGMLPFVFDDSFGFEQYVDYALDVPMYFVYRKKKYVDCTGLSFRDFMNGKLPPIPGEYPTLNDWENHLTTIFPEVRLKRYLEMRGAD…	At4g23100	XP_025888058.1	12	70	12	9	0.0580367	5	3	8	21.2.2	redox.ascorbate and glutathione	Cp	14	4	-	Cp	Cp	C	83	plastid stroma	plastid	plastid
	Solyc01g098610	GSH2	Glutathione synthetase (AHRD V1 **** Q6F4I7_ZINEL); contains Interpro domain(s) IPR005615 Glutathione synthase, eukaryotic	MGSGCSSPSISLTTIATSHFQSQESLSNSLNFYSPTRFLEPHLLKSSKIFIPKSPLKCAKVPEMQTQLEDSAKPIVNDPHDIDSKLVQKLANDALVWCSLRGLLVGDRNSERSGTIPGVDMVHAPVALIPMSFPESHWKQACEVAPIFNELVDRVSQDGEFLQQSLSRTRKADPFTSRLLEIHSKMLEINKLEEIRLGLHRSDYMLDEQTKLLLQIELNTISSSFPGLSCLVSELHRSLLQQYREDIASDPNRIPANNAVNQFAEALAKAWNEYGDPRAVIIFVVQAEERNMYDQHWLSASLRERHQVTTIRKTLAEIDALGELQQDGTLVVDGQAVAVIYFRAGYAPSDYHSESEWKARLLMEQSRAVKCPSISYHLAGSKKIQQELAKPNVLERFLE…	At5g27380	NP_001234014.2	9	29	9	1.683	0.0108529	5	0	5	21.2.2	redox.ascorbate and glutathione	Cp	22	2	Cp	possibly Cp	Cp	Cp	100	cytosol plastid stroma	plastid cytosol	-
	Solyc07g066580	STR1	Mercaptopyruvate sulfurtransferase-like protein (AHRD V1 **** C0LIR4_SOLLC); contains Interpro domain(s) IPR001763 Rhodanese-like IPR001307 Thiosulphate sulfurtransferase, conserved site	MASGILSRSLSLLKSSTFLPSTKQPQLFSSKKTFYYQSAPTYFSYKLVASVTCRMNSSRLATFSTQSVSSNEPVVSVDWLHANLKQPHIKVLDASWYMPNEQRNPLQEYQVAHIPGALFFDVDGISDRTTNLPHMLPSEEAFAAAVSALGIENKDGVVVYDGKGIFSAARVWWMFRVFGHDRVWVLDGGLPRWRASGYDVESSASGDAILKASAASEAIEKVYQRQAVAPITFLTKFQPHLVWTLNQVWKNIEETTYQHIDARSKARFDGVAPEPRKGIRSGHVPGSKCIPFSQMLDGSQTLLSNEELKKKFDQEGISLDKPIVTSCGTGVTACILALGLHRLGKTDVPVYDGSWTEWGGHPDVPVSTSEA	At1g79230	NP_001234274.1	6	23	6	1.976	0.0127423	5	3	8	13.2.5.3	amino acid metabolism.degradation.serine-glycine-cysteine group.cysteine	Cp	52	4	Cp	Cp	Cp	C	49.4	-	mitochondrion plastid	-
	Solyc04g054710	PAT	Bifunctional aspartate aminotransferase and glutamate/aspartate-prephenate aminotransferase	MTAASSSSLLGSSRIGSGPTISGLHSDSLNPTSISFSSNLQGLSLRSSGAKRQLYSRGTGSVVIAQNMDRVEVDLSLSPRVNSVKPSKTVAITDQATALVQAGVPVIRLAAGEPDFDTPAPIAEAGINAIREGHTRYTPNAGTMELRSAICHKLKEENGLSYTPDQIVVSNGAKQSIVQAVLAVCSPGDEVLIPAPYWVSYPEMARMADAMPVILPTSISEDFLLDPKLLESKLTEKSRLLILCSPSNPTGSVYPRKLLEEIAEIVARHPRLLVISDEIYEHIIYAPATHTSFASLPGMWDRTLTVNGFSKAFAMTGWRLGYIAGPKHFVSACNKLQSQFTSGASSISQKAAVAALGLGYAGGEAVATMVKAFRErRNADFLVKSFGEIDGVkinaseP…	At2g22250	NP_001234609.1	8	48	8	4.275	0.0275674	5	3	8	13.1.1.2.1	amino acid metabolism.synthesis.central amino acid metabolism.aspartate.aspartate aminotransferase	Cp	80	1	Cp	Cp	Cp	Cp	98.5	plastid	plastid	-
	Solyc03g005260	APS1	Sulfate adenylyltransferase (AHRD V1 **** Q43183_SOLTU); contains Interpro domain(s) IPR002650 ATP-sulfurylase	MAAISSLSLKTPTKIQSLTKTHYSIPLNLPFSCRSKSKRTGSIGSRTRIRCGLLIEPDGGKLVELFVEESQRELKREDALKLPKIKLTKIDLEWVHVLSEGWASPLKGFMREDEFLQTLHFNSIRLEDGSVVNMSVPIVLAIDDSQKNLIGGSTSVALVDDENNPTAILSDIEIYKHNKEERIARTWGTTAPGLPYVDEAITHSGDWLIGGDLKVIDPVKYNDGLDRFRLSPAELRDEFTRRNADAVFAFQLRNPVHNGHALLMTDTRRRLLEMGYKNPVLLLHPLGGYTKADDVPLHWRMKQHEKVLEDGVLDPETTVVSIFPSPMHYAGPTEVQWHAKARINAGANFYIVGRDPAGMSHPLEKRDLYDANADHGKKVLSMAPGLERLNILPFRVAAY…	At3g22890	XP_004234020.1	18	124	9	12.335	0.0795425	5	3	8	14.1	S-assimilation.APR	Cp	34	2	Cp	Cp	Cp	Cp	100	plastid stroma	plastid cytosol	plastid
	Solyc09g082860	APS1	Sulfate adenylyltransferase (AHRD V1 **** Q43183_SOLTU); contains Interpro domain(s) IPR002650 ATP-sulfurylase	MASLFLKTPGPSQYLPKTHKTHFVLPQHIPLSWRSRYRAGPLAAARIRCGLIEPDGGKLVELVVEETQRDLKRRQALSLPQIKLSKIDIQWVHVLSEGWASPLKGFMRESEFLQTLHFNSLRLGDGSVVNMSVPIVLAIDDSNKNNIGDSSSVALVDDKDNPIAILNDVEIYKHNKEERTARTWGTTAPGLPYAEQAITHAGNWLIGGDLEVIEPIKYHDGLDRFRLSPAELRDEFTRRNADAVFAFQLRNPVHNGHALLMTDTRRRLLEMGYKNPILLLHPLGGYTKADDVPLEWRMKQHEMVLEDGVLDPETTVVSIFPSPMHYAGPTEVQWHAKARINAGANFYIVGRDPAGMGHPLEKRDLYDANADHGKKVLSMAPGLERLNILPFKVAAYDKT…	At3g22890	XP_004247614.1	13	78	4	5.19	0.0334678	5	3	8	14.1	S-assimilation.APR	M	75	5	Cp	possibly Cp	Cp	Cp	99.9	plastid stroma	plastid cytosol	plastid
	Solyc02g032860	APR3	Phosphoadenosine phosphosulfate reductase (AHRD V1 *-** A6EX37_9ALTE); contains Interpro domain(s) IPR004508 Thioredoxin-independent 5'-adenylylsulphate reductase	MALAFTSSTAIHGSISSSSHQHPKVGNIQLLDQPKKSLNFTQrRNACAVKPLYAEPKRNESIVPSAATFVAPEVAEKLIEAEDFEKLAKDLENASPLEIMDNALEKFGDDIAIAFSGAEDVALIEYAHLTGRPFRVFSLDTGRLNPETYQLFDAVEKHYGIRIEYMFPDAVEVQALVRTKGLFSFYEDGHQECCRVRKVRPLrRNAALKGLRAWITGQRKDQSPGTRSEVPVVQVDPSFEGLDGGSGSLVKWNPVANVEGKDIWNFLRAMNVPVNSLHLKGYVSIGCEPCTRPVLPGQHEREGRWWWEDAKAKECGLHKGNIKAESVNGNGNNATQTNDTVADIFDTKGIVTLSRPGVENLLKLEDGREPWLVVLYAPWCQFCQAMEGSYVELAEKLGG…	At4g21990	XP_004231612.1	1	2	1	0.11	0.000709337	1	0	1	14.2	S-assimilation.APR	Cp	63	1	Cp	Cp	Cp	Cp	100	plastid stroma	plastid	-
	Solyc02g080640	APR3	Phosphoadenosine phosphosulfate reductase (AHRD V1 *-** B7I7M3_ACIB5); contains Interpro domain(s) IPR013766 Thioredoxin domain	MALTFTSSSAIHGSLSSSSSSYEQPKVSQLGTFQPLDRPQLLSSTVLNSrRNARSAVKPLYAEPKRNDSIVPSAATIVAPEVGESVEAEDFEKLAKELQNASPLEVMDKALEKFGDDIAIAFSGAEDVALIEYAHLTGRPYRVFSLDTGRLNPETYQLFDTVEKHYGIRIEYMFPDSVEVQALVRTKGLFSFYEDGHQECCRVRKVRPLrRNAALKGLRAWITGQRKDQSPGTRSEIPIVQVDPSFEGLDGGAGSLVKWNPVANVDGKDIWNFLRAMNVPVNSLHSQGYVSIGCEPCTRPVLPGQHEREGRWWWEDAKAKECGLHKGNIKDETVNGAAQTNGTATVADIFDTKDIVTLSKPGVENLVKLEDrRNAEPWLVVLYAPWCQFCQAMEGSYVE…	At4g21990	NP_001233829.1	1	3	0	0.155	0.00099952	3	0	3	14.2	S-assimilation.APR	Cp	71	1	Cp	Cp	Cp	Cp	100	plastid	plastid	-
	Solyc05g056490	SAL1	3'(2') 5'-bisphosphate nucleotidase,5 -bisphosphate nucleotidase SAL2	MSYDKELDAAKASLAARLCQKVQKALLQADVQSKSDKSPVTVADYGSQAVVSVVLQKELCSASFSLVAEEDSGDLRNEEGKSTLQRIMKLVNETLASDGTYGTAPLSEEDVLAAIDSGRSEGGPSGQHWVLDPIDGTKGFLRGDQYAIALGLLDEGKVVLGVLACPNLPLSSLASHNLQDDQDKVGCLFYAQVGSGTYMQSLDGSTPIKVHVTDLDNPEEASFFESFEAAHSLHDLSSLIAKKLGVKAPPVRIDSQAKYGALSRGDGAIYLRFPHKGYREKIWNADHAAGYLVVAEAGGVVSDAAGNPLDFSKGRYLDLHEGIIVTNQKLMPALLKAVKESLNEKASSL	At5g63980	XP_004239634.1	5	15	5	4.337	0.0279672	4	3	7	23.2	nucleotide metabolism.degradation	-	-	4	-	-	Cp	C	78.02	plastid stroma	plastid	plastid
	Solyc02g079250	-	3'(2') 5'-bisphosphate nucleotidase-like protein (AHRD V1 **** Q682R6_ARATH); contains Interpro domain(s) IPR000760 Inositol monophosphatase	MDLLRYSASRYPAAHLQLPFRTPLRRRFVAVRSSLSLPFAEQKAKYYSELEAAVDVVERACRLCVDVKKSLFSSDGRILEKNDQTPVTIADFGVQALVSLEMNKLFPSIPLVAEEDSAFLRSNNLVGSVVDVVKDKATLGDEVTEDNILKAIDRGGKDAYVFAPEPATYWILDPIDGTRGFVRGSEALYVVGLALVVEGKIVLGVMGCPNWHEDCSDNSIIGVQENQSSRSGIIMVSHVGCGTWTKRLSDILSNESPHTWTRCSVDSCQMVQGARVTIPESQAWKSLPLSGLFDAKTDSENIGEGNILLLSACCGSLCKYLMVASGRASVYIQGKKATSIIKVWNADHAVGIICVHEAGGKES	At4g05090	XP_004232790.1	8	36	8	2.594	0.0167275	5	3	8	23.2	nucleotide metabolism.degradation	M	33	2	Cp	possibly M	Cp	M	100	-	plastid	-
	Solyc11g065620	SIR	Sulfite reductase (AHRD V1 **** O82802_TOBAC); contains Interpro domain(s) IPR011787 Sulphite reductase, ferredoxin dependent	MTTSFGAAINIAAVDDPNPKLQIQRFNGLKSTSNSILLSRRIHRSFSHSNSTSIVRAVSTPAKPAAVEPKRSKVEIFKEQSNFIRYPLNEEILNDAPNINEAATQLIKFHGSYMQYNRDERGSRSYSFMLRTKNPGGEVPNKLYLVMDDLADQFGIGTLRLTTRQTFQLHGVLKKDLKTVMSTIIHNMGSTLGACGDLNRNVLAPAAPFAKKDYVFAKQTADNIAALLTPQSGFYYDVWVDGEKFMSVEPPEVVKARNDNSHGTNFPDSPEPIYGTQFLPRKFKIAVTVPSDNSVDIFTNDIGVVVVSDEDGEPQGFNIYVGGGMGRTHRMETTFPRLAEPLGYVPKADILYAVKAIVVTQRENGRRDDRRYSRLKYLLSSWGIEKFRSVTEQYYGKKF…	At5g04590	NP_001266248.1	19	117	19	6.43	0.041464	5	3	8	14.3	S-assimilation.APR	Cp	56	1	Cp	possibly Cp	Cp	Cp	94.8	plastid stroma	plastid	plastid
	Solyc05g055000	NFS2	Cysteine desulfurase (AHRD V1 **** Q10WM4_TRIEI); contains Interpro domain(s) IPR010970 Cysteine desulfurase, SufS	MITTTTPMEGAMLKLPCLRSVSRNTNFTNRSSNSFPWSYRRLHISASASASASAPLVEGPKLGPGSLGHITRSDFPILHQEINGLKLVYLDNAATSQKPRAVIEALQNYYEAYNSNVHRGIHYLSAKATDEYESARQKVANFIHAAEAKEIIFTRNATEAINLVAYSWGLSNLKPGDEIITTIAEHHSAIVPWQIVAQKTGAVLRFVNLTEDEVPDVGQLRDSLSSSTKLLVMHHVSNMLASVLPMDEVISWAHDVGAKVLVDACQSVPHMVVDVKNLDTDFLVGSSHKMCGPTGVGFLYGKSEILSGMPPFLGGGEMIADVYLNADHSTYAEPPSRFEAGTPAIGEAIGLGAAIDYISEIGMQQIHDYEMELGNYLYDRLSSVSDVRIYGPAPSRTVK…	At1g08490	XP_004239746.1	11	57	11	3.786	0.0244141	5	3	8	30.1	signalling.in sugar and nutrient physiology	Cp	45	2	Cp	possibly Cp	Cp	M	92.7	plastid stroma	plastid	-
	Solyc01g094790	CYSC1	Bifunctional L-3-cyanoalanine synthase/cysteine synthase 2	MASLSRFLKKRSLDYNNVDLMRAASNRLFSTQLPHTNIKSEVSQLIGKTPMVYLKKVTEGCGAYIAVKQEMFQPTSSIKDRPALAMINDAEKKGLISPEKTTLIEPTSGNMGISMAFMAAMKGYKMVLTMPSYTSMERRVTMRAFGADLILTDPTKGMGGTVKKAYDLLESTPFMLQQFSNPANTQVHFDTTGPEIWEESLGNVDIFVMGIGSGGTVTGVGQYLKSKNPNVKIYGLEPTESNILNGGKPGPHHITGNGVGFKPDILDMDLMEEVLMVSSEDAVNMARELAVKEGLMVGISSGANTVAALRLAQKPENKGKLIVTVHASFGERYLSSVLYQDLRKEAENMQPISVD	At3g61440	XP_004229909.1	6	14	5	1.955	0.0126069	3	0	3	13.1.5.3.1	amino acid metabolism.synthesis.serine-glycine-cysteine group.cysteine.OASTL	M	29	2	-	-	Cp	M	88.44	-	mitochondrion	plastid
	Solyc03g098230	DCD	Bifunctional D-cysteine desulfhydrase/1-aminocyclopropane-1-carboxylate deaminase	MSSCQWSSFTRVSLSPFPLQPAQLNTALNLKKQCCFTKSSMEDSSSQGHQSAFQFLTKKPYEPPPWASLLSPIPSHTFSLGHFPTPIHKWNLPNLPKNTEVWLKRDDMSGMQLSGNKVRKLEFLLADAVAQGADCIVTIGGIQSNHCRATAVAAKYLNLDCYLILRTSKLLVDKDPGLTGNLLVDRLVGAHIDLVSKEEYAKVGGEALTKILKEKLLNEGRKPYVIPVGGSNSLGTWGYIEAIRELEQQLQHLSIEQKFDDIVVACGSGGTVAGLSIASMLSGLKAKINAFCVCDDPDYFYEYVQGLLDGITAGVSSRDIVSIKTAKGLGYALSTTDELKFVKQVAETTGVILDPVYSGKAAYGMMKDMGENPTKWEGRKILFIHTGGLLGLYDKADEI…	At1g48420	NP_001234368.1	7	10	7	1.404	0.00905372	5	3	8	17.5.1	hormone metabolism.ethylene.synthesis-degradation	Cp	38	4	Cp	possibly Cp	Cp	Cp	90.7	plastid	plastid	plastid
A Names of tomato proteins were based on the literature, NCBI annotation (identified in BlastP searches), and/or SolyGenomics descriptor. In a small number of cases, tomato protein names were assigned based on NCBI annotations and the Arabidopsis homolog.
B Some Sol Genomics descriptors were updated when NCBI annotations and Arabidopsis gene annotations were aligned.
C Target P's subcellular locations are: chloroplast (Cp), mitochondria (M), secretory (S), and no predicted location is indicated by a dash (-).
D ChloroP was used to predict the presence of a chloroplast transit peptide (Y) and the lack of a predicted transit peptide is indicated with a dash (-).
E Predotar's predicted subcellular locations were: chloroplast/plastid (Cp),endoplasmic reticulum (ER) or mitochondrion (M). For proteins with localization predictions that were less clear, Predotar provided categorized of possibly Cp, M and ER. Proteins with unresolved locations or that did not have a homolog detected by Predotar are indicated with a dash (-).
F WoLF PSORT's and YLoc's predicted subcellular locations were: chloroplast/plastid (Cp), cytosol (C), cytoskeleton (Cy), endoplasmic reticulum (ER), extracellular (EX), golgi apparatus (G), mitochondrion (M), nucleus (N), peroxisomes (P), plasma membrance (PM), and vacuole (V). Proteins with no chloroplast location in WoLF PSORT are indicated by not Cp.The number of proteins predicted to be in t…

## Sheet: Table S8C. Nt Metabolism
Table S8C. Nucleotide Metabolism
Category	Gene and protein descriptors						Proteomics					Number times detected			Bin codes		Algorithms								Databases
	Tomato Gene ID	Gene name A	Protein DescriptorB	Protein Sequence	Arabidopis homolog	Tomato protein NCBI accession	Peptides	PSMs	Unique Peptides	emPAI	Mol%	Acetone samples	Gel samples	Total	Bincode	Name	TargetP C ver.1	Transit peptide length	TargetP (reliability class)	ChloroP D	Predotar E	WoLF PSORT F	YLoc F	YLoc % Confidence	PPDB	SUBA4	plprot
Hydrolase	Solyc05g052260	-	Appr-1-p processing domain protein IPR002589 Appr-1-p processing	MASGGENPVTFQLTPSSLLKIQKGDITRWSVDGSSDAIVNPANERMLGGGGADGAIHRAAGPELRDACYKVREVQPGIRCPTGEARITPGFRLPASHVIHTVGPVYDANPNPKASLTYRNSLRVAKENNIQYIAFPAISCGVFGYPYDEAATVAISTVKEFGSDLKEVHFVLFSDEIYDAWVTATNEQLN	At2g40600	XP_004239966.1	2	5	2	0.778	0.00501695	4	0	4	35.1	not assigned.no ontology	-	-	3	-	-	Cp	C	97.48	-	-	-
	Solyc04g080430	-	5'-Nucleotidase (AHRD V1 **** C1FIJ4_9CHLO); contains Interpro domain(s) IPR016695 Purine 5'-nucleotidase	MKGANCCDSISILIASSSSSVITSSNTYKLRLHAAFDSNLKSPKWLFKSKMRIPKRSVSLCLSVFSPSKQLVSSFTRSFHFHLGIFSSNADHLLNRGKSVCRKGRDQLHTSCTMDGIGVDTRAALFEKGNGAIGGQRSCIWSSPEGGCDIVignaKQIFCNRSLNMKSIVAVGFDMDYTLAQYKPETFESLAYEGTVRKLVYDLGYPAELLEWSFDWSYMVRGLVLDKKRGNILKMDRHKYVKVAYHGFRELSKEDKVATYGNTLLRDSFDEPDYALIDTLFSLAEAYLFAQLVDFKDKNPGKVPEDADYSRMYKDVRAAVDLCHRDGTLKQMVAKDPKRYINEDTSIVPMLKMLRESgranaTFLVTNSLWDYTNIVMNFLCGLKPSDGCSSRFDWLQ…	At1g75210	XP_004238263.1	3	9	3	0.445	0.00286959	4	0	4	23.3	nucleotide metabolism.salvage	Cp	68	1	Cp	-	Cp	Cp	95.8	-	-	-
	Solyc05g009920	-	P-loop containing nucleoside triphosphate hydrolases superfamily protein	MWSSSMQILTASSLFSTTKNPYSEFFNQSVKKIESPAKTRRRRGARMEILAMASDNSAKNEKPTKLITFLGKGGSGKTTSAIFAAQHYAMAGLKTCLVIHSQDPTAEYLLNCKIGTSPITCNDNLSAVRLETTKMLLDSLNKLKQADARLNMTQGVLEGVVGEELGVLPGMDSIFSSLALERLVGYFENVVQQNSKKEKFDIIIYDGMSTEETIRMIGATSKARLYLKYLRNFAEKTDLGRLASPSLLRLAEEAMTLSGRNPNLNGKMSSEIWDLLEQVLERGSSIFAEPKRFGCYIVVDRNSPVSMASSLRYWGCIIQAGAQVSGAFALARPNSSGEVGATIEDFSPLPSAFVPHISDGAHLDWDKIMQDSHSESARNLLTVTAHEARIPAVIFDPTN…	At1g26090	XP_004238972.1	9	59	9	2.311	0.0149025	5	3	8	35.2	not assigned.unknown	Cp	50	1	Cp	Cp	Cp	Cp	92.6	plastid	plastid	-
	Solyc05g010150	-	5'-deoxynucleotidase; HD domain containing protein (AHRD V1 ***- B6TWI3_MAIZE); contains Interpro domain(s) IPR006674 Metal-dependent phosphohydrolase, HD region, subdomain	MAAKANPNSPFLSSSSSTHYSSFPFHQVSKKKVSFLVDFQCRKLVFACSEKPIPDSVNLDPSISNSGSGSSKNDSDGASSSPSNAIDFLTLCHSLKTTKRKGWVNHAIKGSESIANADHMYRMSLMALIVGDLPGVNRERCIKMAIVHDIAEAIVGDITPSDGVPKAEKSRLEQAALTEMCKVLGGGMRAEEIKELWQEYENNASLEANLVKDFDKVEMILQALEYESEHGKVLDEFFLSTAGKFQTEIGKSWAAEIHLRRNSRLGN	At1g26160	XP_004238984.1	4	18	4	2.981	0.019223	5	3	8	35.1	not assigned.no ontology	Cp	62	2	Cp	Cp	Cp	Cp	84.1	plastid stroma	plastid	-
	Solyc12g098830	-	5'-nucleotidase (AHRD V1 ***- A9F2C9_SORC5); contains Interpro domain(s) IPR008380 HAD-superfamily hydrolase, subfamily IG, 5'-nucleotidase	MSCSTVCQAVVSCMSIPNSTSRSTAVFSNTQKLDGALVFRSSVSYNRVNVFSSCRCSAATSVPPGEDVFSVVTSSTTSEVDYLGESTKGDLNLNFGIDGNTLQGPVEEVAKMEAQEAENLLQHLGIPVPYNARHSPRGIFCSRTLNLRSISAIGYDMDYTLMHYNVMAWEGRAYDYCMENLRNVGFPVDGLAFDPDLVIRGLVIDKEKGNLVKADRFGYIKRAMHGTRMLSTREVSEIYGRELVDLRKESKWEFLNTLFSVSEAVAYMQLVDRLDKGVignaPDLCPNEYKGLYKAVGKALFRAHVEGQLKSEIMSKPELFVEPDPELPLALLDQKEAGKRLLLITNSDYHYTDKMMQHSFNRYLPNDMNWRDLFEMVIVSARKPEFFQMAHPMYEVVT…	At5g48960	XP_004252960.1	10	31	10	2.03	0.0130905	5	3	8	35.1	not assigned.no ontology	Cp	55	1	Cp	Cp	Cp	Cp	96.4	plastid stroma	plastid	plastid
Kinase	Solyc03g078080	PUMPKIN	Plastid 55 UMP kinase, PUMPKIN; Uridylate kinase (AHRD V1 **** B6TC37_MAIZE); contains Interpro domain(s) IPR015963 Uridylate kinase, bacteria	MAISTSFCRPISSFNALSSPSLCYFKPLYNHLKLDPSLPLVKCCSSHIGQSPEHINGRQPDLSPIASFGVTMTNNGTSKPSYRWrRNAVLLKVSGEALAGDQAQNIDPKITMAIAREVAAVTRLGIEVAIVVGGGNIFRGSSWAGSSGLDRSSADYIGMLATVMNAIFLQATMESIGIPTRVQTAFRMSEVAEPYIrRNARAVRHLEKGRVVIFAAGTGNPFFTTDTAAALRCAEINAEVVLKATNVDGVYDDNPKHNPNARLQDNLTYHDVISKELSVMDLTAITLCQENNIPVVVFNLNKTGNIAKAIKGERVGTLIGDTWNTEAVVS	At3g18680	XP_004235078.1	1	3	1	0.166	0.00107045	3	1	4	23.4.3	nucleotide metabolism.phosphotransfer and pyrophosphatases.uridylate kinase	Cp	13	4	-	Cp	Cp	Cp	93.9	plastid stroma	plastid	-
	Solyc09g065860	-	Uridine kinase IPR000764 Uridine kinase	MEASSFPATFTKLRYPFSETLLSKREDFPVWIKCYASPLSTKTGTSLCQAGFRTRKWSLLQVSCSREREIPVIEAGCMDDIYDALAEHLVPTAAAASSPNFKHIVGLAGPPGAGKSTVASEVVKRVNKLWPQKSRSFDSQVEPPEVAIVLPMDGFHLYRHQLDAMEDPKEAHARRGAPWTFDPNLLLECLKTLKDQGSVYCPSFNADHGVGDPVEDDIFVNLQHKIVIVEGNYLLLRDGAWKEVSSMFDEKWFVDVDLEKAMQRVLKRHISTGKSPNVAKWRIDYNDRPELIMKSKNDLVIKSIDELR	At1g03030	XP_004247213.1	3	10	3	0.668	0.00430761	4	3	7	23.3.2.2	nucleotide metabolism.salvage.nucleoside kinases.uridine kinase	-	-	3	-	-	Cp	Cp	72.89	plastid stroma	plastid	-
	Solyc09g007180	AK1	Adenylate kinase (AHRD V1 **** B6SLP1_MAIZE); contains Interpro domain(s) IPR006259 Adenylate kinase, subfamily	MAAMIRLFRSSSSSSSLISRSLSTAAASETVKSRSYPHSTSVEPKAKSVQWVFLGCPGVGKGTYASRLSTLLGVPHIATGDLVRDELKSSGPLSKQLAEIVNQGKLVSDEIILNLLSKRLESGEAKGEAGFILDGFPRTVRQAEILTEVTDIDLVVNLKLPERVLVEKCLGRRICSECGKNFNVASIDVAGENGAPRISMAPLNPPSQCISKLITRADDTEAIVKERLSIYWDKSQPVEDFYRSQGKLLEFDLPGGIPESWPKLLEVLNLDEQEHKLSAAA	At2g37250	XP_004246709.1	1	1	1		0	0	1	1	23.4.1	nucleotide metabolism.phosphotransfer and pyrophosphatases.adenylate kinase	Cp	64	5	Cp	M	Cp	Cp	0.5909	-	plastid	-
	Solyc06g065270	AK2	Adenylate kinase (AHRD V1 **** B6STL7_MAIZE); contains Interpro domain(s) IPR006259 Adenylate kinase, subfamily	MASCCSLSFSTVSSKPNKPYSSPISSSLELPFTSQLPFSKKYSLYSNHTLLQTQCRKTQSPDCPSFLVVGSAKKQEPLRVMISGAPASGKGTQCELITKKYDLVHIAAGDLLRAEIAAGTENGrRNAAKEYMDKGQLVPNEIVVTMVKERLMCPDSQEKGWLLDGYPRSLSQAVALKEFQPNLFILLEVPEEILVERVVGrRNALDPVTGRIYHLKYSPPETDEIAARLTQRFDDTEEKVKLRLHTHRQNVESVLSMYKDTIFQVDGSVSKEEVFAQIDGALTQLLEAKE	At5g47840	XP_004241834.1	7	41	5	2.162	0.0139417	5	3	8	23.4.1	nucleotide metabolism.phosphotransfer and pyrophosphatases.adenylate kinase	Cp	69	2	Cp	Cp	Cp	Cp	99.7	plastid stroma	plastid	plastid
	Solyc12g010380	AK5	Adenylate kinase-like protein (AHRD V1 ***- Q8VYL1_ARATH); contains Interpro domain(s) IPR018962 Domain of unknown function DUF1995	MAMIASVTMNFPHISTHNISSNQTFSPICTNNPSNFSSSSSSSIPISSNSIRLSSSIAYSEQLIASHNVNRRTKNRKIKVISARSEPLKVMISGAPASGKGTQCELIVQKFGLVHISTGDLLRAELSAGTDIGNKAKEYMNAGRLVPDEIVTAMVTTRLSKEDAKEKGWLLDGYPRTLAQAESLERLNIRPDIYIVLDVPDAILIDRCVGRRLDPLTGKIYHVTNFPPETEDIKARLITRPDDTEEKVKSRLQIYKQNAEAILPVYSDIMNKIDGNRGKDSVFAEIDSLLSRVQKEEQDARKSEESAISSTRADMASLSKDWRGIPTRLNNIPHSREIREYFYTDVLQATQRAVNDGKTRLKIEINIPELNPSMDVYRIGTLMELIRVLALSFADDGKR…	At5g35170	XP_004251770.1	25	144	23	23.384	0.150792	5	3	8	23.4.1	nucleotide metabolism.phosphotransfer and pyrophosphatases.adenylate kinase	Cp	93	1	Cp	Cp	Cp	C	84.9	plastid	plastid	plastid
	Solyc01g089970	NDK1	Nucleoside diphosphate kinase IPR001564 Nucleoside diphosphate kinase, core	MEQTFIMIKPDGVQRGLVGEIISRFEKKGFSLKGLKLITVDRAFAEKHYADLSAKPFFNGLVEYIVSGPVVAMVWEGKGVVATGRKIIGATNPLESAAGTIRGDFAIDIGRNVIHGSDAVESARKEIALWFPEGIAEWQSSLHSWIYE	At4g09320	NP_001234174.2	6	18	4	9	0.0580367	5	3	8	23.4.10	nucleotide metabolism.phosphotransfer and pyrophosphatases.nucleoside diphosphate kinase	-	-	1	-	-	Cp	C	86.91	-	cytosol	-
	Solyc03g110960	NDK2	Nucleoside diphosphate kinase (AHRD V1 **** B9RAM1_RICCO); contains Interpro domain(s) IPR001564 Nucleoside diphosphate kinase, core	MESLCIVRASPCVSSSSSLSSKTSSLSCAPSCRVILNPIKKHHNLAAFQPAFHLFASTQSGPHGSKRNHTARIFLPHLVASMEEVEETYIMIKPDGVQRGLVGEIISRFEKKGFKLTGLKLFQCPKELAEEHYKDLQSKSFFPKLIDYITSGPVVCMAWEGIGVVASARKLIGATNPLNAEPGTIRGDLAVQTGRNVVHGSDSPENGKREIALWFKEGELSSWTPAQQPWLTE	At5g63310	XP_004236354.1	9	83	4	9	0.0580367	5	3	8	23.4.10	nucleotide metabolism.phosphotransfer and pyrophosphatases.nucleoside diphosphate kinase	Cp	79	1	Cp	Cp	Cp	Cp	99.9	plastid stroma	plastid	plastid
	Solyc06g071960	NDK2	Nucleoside diphosphate kinase (AHRD V1 **** B9RAM1_RICCO); contains Interpro domain(s) IPR001564 Nucleoside diphosphate kinase, core	MEGLTIVGATPCVSSSLrRNAISSKTTCLASRLTPKSVKKHSLAALQPAFYLFSTNVPKRQIRARIFLPHLVASMEEVEQTYIMIKPDGVQRGLVGEIISRFERKGFKLTGLKLFQCPKELAEEHYKDLQSKPFFPKLIDYITSGPVVCMAWEGVGVVASARKLIGATNPLNAEPGTIRGDLAVQTGRNVVHGSDSPDNGKREIGLWFNEGELCAWAAALEPWLVE	At5g63310	XP_004241524.1	6	68	1	6.743	0.0434824	2	0	2	23.4.10	nucleotide metabolism.phosphotransfer and pyrophosphatases.nucleoside diphosphate kinase	Cp	70	1	Cp	Cp	Cp	Cp	99.7	plastid stroma	plastid	plastid
	Solyc08g082430	NDK3	Nucleoside diphosphate kinase (AHRD V1 ***- D5ILC3_SOLTU); contains Interpro domain(s) IPR001564 Nucleoside diphosphate kinase, core	MNSQICRSATRAAKSLLSASSKQTSRAFSGGRAAAAAATVSLRGVVPSLASYGRNESGNASRAWISGVLALPAAAYMLQEQEAHAAEMERTFIAIKPDGVQRGLISEIVSRFERKGFKLVAIKVVIPSKEFAKKHYHDLSERPFFNGLCDFLSSGPVLAMVWEGEGVIRYGRKLIGATDPQKSEPGTIRGDLAVVVGRNIIHGSDGPETAKDEINLWFKPEELVNYTSNSEKWLYGDN	At4g23895	XP_010325356.1	3	11	1	0.931	0.00600357	4	3	7	23.4.10	nucleotide metabolism.phosphotransfer and pyrophosphatases.nucleoside diphosphate kinase	Cp	35	5	Cp	possibly M	Cp	M	63.2	-	-	-
	Solyc08g077200	PRS1	Ribose-phosphate pyrophosphokinase 1 (AHRD V1 ***- D7KHJ9_ARALY); contains Interpro domain(s) IPR005946 Phosphoribosyl pyrophosphokinase	MASFLVLPSPSSASTSYSTPLFSSSRSFLTHKSFVPKRTCLRTSVNCEISEPVNGKPRVPIINDGTLPKFLQASRLQNSVSRNNNRLKIFTGTANPSLSQEIAWYMGFELGKVKIKRFADGEIYVQLQESVRGCDVYLVQSTCPPANENLMELLVMIDACrRNAASAKTITAVIPYFGYARADRKTQGRESIGAKLVANLITEAGADRVLACDLHSGQSMGYFDIPVNADHVYCQPVVLDYLASKKISSDDLVVVSPDVGGVARARAFAKKLSDAPLAIVDKrRNAHGHNVAEVMNLIGDVKGKVAVMVDDMIDTAGTIAKGAALLHQEGAREVYACCTHAVFSPPAIERLSSGLFQEVIVTNTIPAIEKNCFPQLTVLSVANLLGETIWRVHDDCSVS…	At1g32380	XP_004245875.1	2	2	2	0.334	0.00215381	1	0	1	23.1.3	nucleotide metabolism.synthesis.PRS-PP	Cp	46	3	Cp	Cp	Cp	Cp	86.6	plastid stroma	plastid	-
	Solyc04g039620	PRS3	Ribose-phosphate pyrophosphokinase 3 (AHRD V1 ***- B6SK13_MAIZE); contains Interpro domain(s) IPR000836 Phosphoribosyltransferase	MSTTTPPSPPQRLAALPCHTSNKLRNYTPIQSFNRKDFSIRCEFENSQRWTVGCVSGTDPIHIILKPPSIPMTSAAVLGSSGKNSKRVCLFYCNEMKDLAERIASQSDAIELRNITWRTFEDGFPNLFISNAHGIRGQHVAFLASFNSPGVIFEQLSVIYALPKLFVSSFTLVLPFFPTGTSERMEDEGDVATAFTLARILSNTPVPRGGPTSLVIFDIHALQERFYFGDNILPCFESGIPLLLNRLQQLPDSDNISIAFPDDGAWKRFHKQLQHFPMIVCAKVREGDQRIVRIKEGDPAGRHVVIVDDLVQSGGTLTECQYVC	At1g10700	XP_004237341.1	1	2	1	0.233	0.0015025	2	2	4	23.1.3	nucleotide metabolism.synthesis.PRS-PP	Cp	41	3	Cp	-	Cp	Cp	95.3	-	-	-
Purine biosynthesis	Solyc01g110520	ASE2	amidophosphoribosyltransferase, chloroplastic	MAAAVSTAVTNKSHLSSALDKPFTTPSQKLLSLAVKTLPKPYHHHHRTLITAASKNPLTDVVSSKPIPDGRSFDSYFHDDDDKPREECGVVGIYGDSEASRLCYLALHALQHRGQEGAGIVCVNDNVLKSITGVGLVSDVFSESKLDQLPGDLAIGHVRYSTAGSSMLKNVQPFVASYRFGSVGVAHNGNLVNYKQLRGELEENGSIFNTSSDTEVVLHLIAISKARPFLLRIVEACEKIEGAYSMVFATEDKLVAVRDPYGFRPLVMGrRNASNGAVVFASETCALDLIEATYEREVLPGEVVVVDKEGVQSICLMPHPEPKSCIFEHIYFALPNSVVFGRSVYESrRNAAFGEILATEAPVECDVVIAVPDSGVVAALGYAAKAGVPFQQGLIRSHY…	At4g34740	XP_004230902.1	11	35	10	1.154	0.00744159	5	3	8	23.1.2.1	nucleotide metabolism.synthesis.purine.amidophosphoribosyltransferase	Cp	5	2	Cp	Cp	Cp	Cp	99.9	plastid	plastid	-
	Solyc07g006530	ASL	Adenylosuccinate lyase (AHRD V1 ***- Q6T7E9_TOBAC); contains Interpro domain(s) IPR004769 Adenylosuccinate lyase	MELGTSFSASGVNKTMYLSNPITQKSNFLQNSWLNQLNFSFPVRKICSCRGIAKGSTISSLKTQEKVTEMSSNHSQDLELSSLTALCPLDGRYWGKVKELAPFMSEYGLIRFRILVEIKWLIKMSQIPQIIEVPTFSEEAQTFLHDLIDGFSMNDALEVKKIERVTNHDVKAVEYFLKQKCQSHPEISKVLEFFHFACTSEDINNLAHALMLKGALNTVILPVMDELIKAICDMATTHSSVPMLSRTHGQPASPTTLGKEMAIFAYRLSRERKEISQIEMLGKFAGAVGNYNAHVAAYPEINWPEIAEEFVLSLGLEFNPYVPQIETHDYMAKLFHSIVQFNNILVDFDRDVWGYISLGYFKQTTKAGEIGSSTMPHKVNPIDFENSEGNLGVANGDLS…	At1g36280	XP_004242661.1	12	57	12	4.337	0.0279672	5	3	8	23.1.2.8	nucleotide metabolism.synthesis.purine.SAICAR lyase	Cp	50	3	Cp	possibly Cp	Cp	Cp	89.9	plastid stroma	plastid	-
	Solyc01g103440	PUR2	Phosphoribosylamine--glycine ligase (AHRD V1 ***- D7KJV0_ARALY); contains Interpro domain(s) IPR000115 Phosphoribosylglycimide synthetase	MACMSLNIGAASALKFVSNSQNHPVKLFSAKEQRCSNFSSSNWGCFSLRVrRNASSCLRFDTQKSFAVFNSLPVDNSNPKESVVVLVignaGGGREHALCHALrRNASPSCDAIFCAPGNAGISSSGDATCISDLDVLDSSAVIAFCRKWGVGLVVVGPEAPLVAGLANDLVKEGIPTFGPSSEAAALEGSKNFMKSLCDKYGIPTAKYQAFTDPSAAKEYIKQEGAPIVVKADGLAAGKGVIVAMTLEQAYEAVDSMLVDNVFGSAGSRVIVEEYLEGEEASFFALVDGEHAIPLESAQNADHKRVGDGDTGPNTGGMGAYSPAPVLTKELQSMVMESIIFPTVKGMAEEGCKFVGVLYAGLMIEKKSGLPKLIEYNVRFGDPECQVLMVRLESDLVE…	At1g09830	XP_004230444.1	7	31	7	1.565	0.0100919	5	3	8	23.1.2.2	nucleotide metabolism.synthesis.purine.GAR Synthetase	Cp	57	1	Cp	Cp	Cp	Cp	100	plastid stroma	plastid	plastid
	Solyc11g006340	ADE2	Phosphoribosylaminoimidazole carboxylase ATPase subunit (AHRD V1 *-** B9LJ70_CHLSY); contains Interpro domain(s) IPR016301 Phosphoribosylaminoimidazole carboxylase	MLSLNNTLPTISVHQRISFVSTIFAQKRVIFRTMDKNQRVLLSSSQQTENSSSILSCKASLEVVHDSPSGSAVHGLSETVVGVLGGGQLGRMLCEAASQMAIKMIVLDPMENCPASALAHQHVVGSYDDSATVEEFGKRCGVLTVEIEHVDVATLEKLEQQGVDCQPKASTIRIIQDKYLQKVHFSRHSIPLPKFMQIDNLESARRAGDMFGYPLMIKSRRLAYDGRGNAVAKSEEQLSSAVNALGGYDRGLYVEQWAPFVKELSVIVARGRDNSIACYPAVETIHRDNICHIVKSPANVSWKIMKLATDVAHRAVSSLEGAGVFAVELFLTEDGQILLNEVAPRPHNSGHHTIEACFTSQYEQHLRAVVGLPLGDPSMKTPAAVMYNILGEDDGEPGF…	At2g37690	XP_004249928.1	11	26	11	1.807	0.0116525	5	3	8	23.1.2.6	nucleotide metabolism.synthesis.purine.AIR carboxylase	Cp	58	3	Cp	possibly Cp	Cp	Cp	74.4	plastid	plastid	-
	Solyc11g012100	PUR3	Phosphoribosylglycimide formyltransferase (AHRD V1 ***- D7KK96_ARALY); contains Interpro domain(s) IPR002376 Formyl transferase, N-terminal	METQNLSFGLSSTLPTSPIQNQKNPFFQILLKPPSSSNILTLKGVFLKPHVSFSPKSFPSKEFFQCRNCLQRIEREAITVPDSGVSKELRKKKLAVFVSGGGSNFRSIYEATLEGTVHGEVAVLVTNKKDCGGAKYAREQGIPVIVFPKAKNSSEGLSEEDLVGSLRAYNIDFILLAGYLKLIPTELVQAFPRSIFNIHPSLLPSFGGKGYYGIKVHKAVIASGARYSGPTIHYVDEHYDTGRILAQGVVPVLANDTAETLAARVLQEEHKLYVEVAAALCEERIVWREDGVPLIQSKEDPNHYK	At1g31220	XP_004250253.1	5	15	5	1.054	0.00679674	5	3	8	23.1.2.3	nucleotide metabolism.synthesis.purine.GAR transformylase	Cp	81	3	Cp	-	Cp	Cp	99.9	plastid stroma	plastid	-
	Solyc04g058090	PUR5	Phosphoribosylformylglycimidine cyclo-ligase (AHRD V1 **** Q6T7F2_SOLTU); contains Interpro domain(s) IPR004733 Phosphoribosylformylglycimidine cyclo-ligase	MNTSCGANLELSRCIAASPVCHLKSSIFELRSCIPKLQGLSKKLLPLCKDINARSNKERSIPFSVTCSGSQVDTAADEPSSLTYKDAGVDIDAGSELVKRIAKMAPGIGGFGGLFPLGDSYLVAGTDGVGTKLKLAFETGIHDTIGIDLVAMSVNDIVTSGAKPLFFLDYFATSRLDVDLAEKVIKGIVDGCQQSDCALLGGETAEMPDFYAEGEYDLSGFAVGIVKKDSVIDGKNIKVGDVLIGLPSSGVHSNGFSLVrRNAVLKQSGLSLKDQLPGESITLGEALIAPTVIYVKQVLDIISKGGVKGIAHITGGGFTDNIPRVFPKGLGALIYEGSWTIPPVFKWIQEAGRIEDAEMMRTFNMGVGMVLVVSPEAADGILMEVQKTSIAYRIGEVVK…	At3g55010	XP_004237359.1	9	51	9	3.437	0.0221636	5	3	8	23.1.2.5	nucleotide metabolism.synthesis.purine.AIR synthase	Cp	54	2	-	-	Cp	Cp	100	plastid stroma	plastid	-
	Solyc01g107270	PUR4	Phosphoribosylformylglycimidine synthase (AHRD V1 ***- A9Y5J1_ARATH); contains Interpro domain(s) IPR010073 Phosphoribosylformylglycimidine synthase, eukaryotes and proteobacteria	MLPPLNPLYPFRPQTLASNPKQNTITPVTRSRVWQWQHLLETLLQQSSYKQIVCFGGTLPRLSPIPYSRKNLRLRSHIPAKIRAVVSKDVSSLVNEDSGEFQEVAEKVIHVYGIPFQQDSATAELLKLVQTKISNQIIGETYEPERLGSESFLDGEKRTSVDAYIIEVGPRLSFTTAWSAVSICQACGLTEINRMNADHSFASMVHDRMTECVYAEKLSSFKTSIVPEEVRYIPIMEKGRKALEEINEKMGLAFDEQDLKYYTKLFRDDIKRNPTNVELFDIAQSNSEHSRHWFFTGKLVLDGHPVDKTLMQIVKSTLLTNPNNSVignaFKDNSSAIKGFPVKQLRPTQPGSTCSLDVTDRFLDILFTAETHNFPCAVTPYPGAETGAGGRIRDTHAT…	At1g74260	XP_004233026.1	7	23	7	0.341	0.00219894	5	3	8	23.1.2.4	nucleotide metabolism.synthesis.purine.FGAR amidotransferase	Cp	83	3	Cp	-	Cp	C	92.3	plastid stroma mitochondria	mitochondrion,plastid	plastid
	Solyc02g076720	PUR4	Phosphoribosylformylglycimidine synthase IPR010073 Phosphoribosylformylglycimidine synthase, eukaryotes and proteobacteria	MVSEKINSYPSTITVSTPPTIEIYVSLPFLTINFPRILQQVLAMATSAWDIAATEFLQGFHRQKLALPRHSSKQTNLLLWGTLPRQSSFGYSHKNLRLRSHIPAKISAVVSGNVSSLVDENSGKVQEVAENLIHLYRVPFLQDSATAELLKLVQTKISNQIIGLKTEQCFNVGLKSDLSSDKFSVLKWLLGETYEPESLGSESFLEREQRKHPDAYIVEVGPRLCFTTAWSAVSICQACGLTEINRLERSRRYLLYVKGSLLDSQINEFASMVHDRMTECIYVEKLTSFKTSIVPEEVRYIPVMEKGRKALEEINEEMGLAFDEQDLQYYTKLFRDDIKRNPTNVELFDIAQSNSEHSRHWFFTGKLVIDGQPVDKTLMQIVKSTLLANPNNSVignaF…	At1g74260	XP_004233026.1	30	119	24	3.359	0.0216606	5	3	8	23.1.2.4	nucleotide metabolism.synthesis.purine.FGAR amidotransferase	-	-	1	-	-	Cp	Cp	73.99	plastid stroma mitochondria	mitochondrion,plastid	plastid
	Solyc01g081300	PUR7	Phosphoribosylaminoimidazole-succinocarboxamide synthase (AHRD V1 **** Q6T7F0_TOBAC); contains Interpro domain(s) IPR001636 SAICAR synthetase	MALPALNPPKTLNKKLQSLNSPFFSFSKTASFPKITKCKKYPLITMSSQQQSPPPHVALTNNNADHKEELMRAIKSSITNCLSETHLDLTVPQLKSKIRGKVRDIYDGGDYLVMVTTDRQSAFDRILASIPFKGQVLNETSLWWFNKTQHITPNAVVSVPDKNVTIARKCSVFPVEFVVRGYVTGSTDTSLWTVYNKGVRNYCGNNLPDGLVKNQKLTENILTPTTKAANADHDVPVTPDEIVQRGLMTQADYDEVSRRAMSLFEFGQHVALNADHGLILVDTKYEFGKGPDGQIYLIDEVHTPDSSRYWIAHSYQERIQNGLEPENIDKEFLRLWFKSHCNPYEDEVLPDAPEELVSELAWRYIFLFETITNSRFEMPETKEPVHDRISRNVSQALSS…	At3g21110	XP_004229526.1	10	24	10	2.728	0.0175916	5	3	8	23.1.2.7	nucleotide metabolism.synthesis.purine.SAICAR synthetase	Cp	46	3	Cp	Cp	not Cp	Cp	100	plastid stroma	plastid	-
	Solyc02g085520	PURA	Adenylosuccinate synthetase, chloroplastic (AHRD V1 **** PURA_SOLBU); contains Interpro domain(s) IPR001114 Adenylosuccinate synthetase	MNISTLRLDSNPITTATATHRNGILGCNGTYSYRFNQFQQRKKTASIVVCSTKPLASVVNADHQGVNESGLRRIESLSQVSGVLGCQWGDEGKGKLVDILAKHFDIVARCQGGANAGHTIYNSEGKKFALHLVPSGILNEETLCVignaNGVVVHLPGLFKEIDGLEANGVSCQGRILVSDRAHLLFDFHQEIDGLREAELAKSFIGTTKRGIGPCYSSKVIRNGLRVSDLRHMDTFPQKLDLLLSDAAARFPGFKYGPDMLREEVERYKKFAERLEPFVTDTVHFMNDAISQKKKILVEGGQATMLDIDFGTYPFVTSSSPSAGGICTGLGIAPKVVGDLVGVVKAYTTRVGSGPFPTEIMGKGGDLLRFAGQEFGTTTGRPRRCGWLDIVALKFCCQ…	At3g57610	AAG01122.1	15	82	10	3.084	0.0198872	5	3	8	23.1.2.20	nucleotide metabolism.synthesis.purine.adenylosuccinate synthase	-	-	5	Cp	-	Cp	C	100	plastid stroma	plastid	plastid
	Solyc10g080320	PURA	Adenylosuccinate synthetase (AHRD V1 **** Q9FYW9_SOLLC); contains Interpro domain(s) IPR001114 Adenylosuccinate synthetase	MNMSTMRLDASSITTAKATATAKVSHRSGTIGYNGTNSCRLIQFQQRKKKASSMIVCSKNPLASVVDRQGVNESGLSRIESLSQVSGVLGCQWGDEGKGKLVDILAKHFDIVARCQGGANAGHTIYNSEGKKFALHLVPSGILNEETLCVignaNGVVVHLPGLFNEIDNLESNGVSCQGRILVSDRAHLLFDFHQEVDGLREAELDKSFIGTTKRGIGPSYSSKVIRNGIRVSDLRHMDTFPQKLDLLLSDAASRFQGFKYCPDMLREEVERYKKFAERLEPFVTDTVHFMNDAISQKKKILVEGGQATMLDIDFGTYPFVTSSSPSAGGICTGLGIAPRVVGDLVGVVKAYTTRVGSGPFPTELMGEYGDLLRSAGQEFGTTTGRPRRCGWLDIVAL…	At3g57610	XP_004249273.1	10	48	5	1.807	0.0116525	5	3	8	23.1.2.20	nucleotide metabolism.synthesis.purine.adenylosuccinate synthase	Cp	62	2	Cp	possibly Cp	Cp	C	99.8	plastid stroma	plastid	plastid
	Solyc08g075160	-	Putative inosine monophosphate cyclohydrolase; Bifunctional purine biosynthesis protein purH (AHRD V1 ***- D4Q5I3_LISMO); contains Interpro domain(s) IPR002695 AICARFT/IMPCHase bienzyme	MLSASSAATTPATAIAAKAFRTQIPQLHTIRTRTNADHCFGPQQFSKTSYRLIVHPVKAMAETVATPQSSPKLSTSGRKQALISLSDKTDLAKLGNGLQELGYTIVSTGGTASALEGAGVSVTKVEELTRFPEMLDGRVKTLHPGIHGGILARRDQEHHMEALEKHEIGTFDVVVVNLYPFYAKVSSSSGISFEDGIENIDIGGPAMIRAAAKNHRDVLVVVDSEDYPDLLEFLRGDNDDQQFRRKLAWKAFQHVASYDSAVSEWLWKQTVGDKFPPSLTVPLSLKDQLRYGENPHQKAAVYVDKSLSEVNAGGIATVIQHHGKEMSYNNYLDADAAWNCVCDFNQPTCVVVKHTNPCGVASRNDIIEAYRLAVKADPVSAFGGIVAFNVEVDEALAKD…	At2g35040	NP_001234704.1	9	49	9	2.433	0.0156892	5	3	8	23.1.2.9	nucleotide metabolism.synthesis.purine.AICAR transformylase	Cp	3	2	Cp	possibly M	Cp	Cp	94.7	plastid stroma	plastid	plastid
Pyrimidine biosynthesis & degradation	Solyc02g080780	-	Orotidine 5'-phosphate decarboxylase	MLGLQNPQAISSCQSFLDTSVLHELIPCKSKNVNPSISNLSSATLVRSPAKGVSSCSFSWNWPNQLKTYKLSQQSASYRLLCRSQDATSPENEYRSSRNIAISLFRRYKNFLERGGGDNLKEFISAGVNAYALGCTDEGLRKELFSLKESGVEIEAMETYGGSTSLKSKILSVEVDECIMWLSIIFITILCTPQPTIVRWSSTSPVSDEMIVQWKGFCAIIANAYFVRGMAWLPVKTLQLEQMAVAGHAEEPSVVASRMRLVFTTLEVVSPQWPRG	At1g62250	XP_004232700.1	1	1	1	0.212	0.00136709	1	2	3	35.2	not assigned.unknown	Cp	42	4	Cp	possibly Cp	Cp	Cp	40.1	-	-	-
	Solyc10g037900	-	Dihydroorotate dehydrogenase (DUF3598) [Arabidopsis thaliana]	MNTIIQSPSLDACKSFKLLRSSSYHYTTPSIHKPNYCYFCVSCRDTGGRKFDSRERAKVHGKGKENVWSIDNEMAKTDKERDKPRRGRRKRGGKRMRNVTRKNKGDRVMISSAMLMEVETVLQTQEPVILPAWNTFISSVSGIWKGVGAVFSPITAEMEPIEIGYKNEHLFDCYTLSRIDIESSASASQRSLIRRKVNWVTVNPHGEVPESNGDDNRSLENFTDAALSSDIHDTPDRKSRNLPKFESFDFGKTDIMEEDIMGMEPGLVFFEDGSYSRGPVDIPVGELDESNYYLSPTFKFEQLNIWSMILKGIEMLIFGEMENIR	At2g44760	XP_004248537.1	4	17	4	4.179	0.0269484	5	0	5	35.2	not assigned.unknown	-	-	1	-	-	Cp	Cp	94.27	-	-	-
	Solyc03g097910	PYD1	Dihydropyrimidine dehydrogenase (NADP(+)), chloroplastic	MASLGLAQRIRIGLDGNSGVENPVMGRAGRLNFGRKRVGFRIMALEGQSVEPDLSVTVNGLKMPNPFVignaSGPPGTNYTVMKRAFDEGWGGVIAKTVSLEADKVKNVTPRYAKLRADANGSAKGQIIGWQNIELISDRPLETMLKEFKQLKEEYPDRILIASIMEEYNKAAWEELIYRCEETGIDAFEINFSCPHGMPERRMGAAVGQDCDLLEEVCGWIVATVPVWAKMTPNITDITKPARVALNQGCEGVSAINTIMSVMGINLDTLRPEPCVEGYSTPGGYSSKAVHPIALAKVMNIARMMKSEFGDKDYSLSAIGGVETGGDAAEFILLGADTVQVCTGVMMHGYGLVKTLCSELKDFMRKHNFSSIEDFRGTSLEYFTTHTDLVRRQQEAIR…	At3g17810	NP_001234738.1	8	23	7	3.084	0.0198872	5	3	8	23.2.1.3	nucleotide metabolism.degradation.pyrimidine.dihydrouracil dehydrogenase	-	-	5	-	possibly M	Cp	C	43.18	plastid	plastid	-
	Solyc11g006350	PYRB	Aspartate carbamoyltransferase (AHRD V1 ***- Q8L6B8_SOLTU); contains Interpro domain(s) IPR002082 Aspartate carbamoyltransferase, eukaryotic	MTISATLSSHGKILMSPLRKSEWANQPVLCKSVELFKNGRNEYRMSTNSNKFQCRALEIENKSSTKFHLDDVIESQQFDRETLSAIFEVAQEMEKIEKNSIGGRSEILKGYLMATLFYEPSTRTRLSFESSMKRLGGEVLTTENAREFSSAAKGETLEDTIRTVEGYSDIIVMRHFESGAARRAALTASIPIINAGDGPGQHPTQALLDVYTIGREIGKLDGINIALVGDLAYGRTVRSLAHLLALYKDVKIYFVSPDVVKMKDDIKDYLTSMGVRWEESADLIEVASKCDVVYQTRIQRERFGERVDLYEEARGKYIVDMSVVNAMQKHAVVMHPLPRLDEITVDVDGDPRAAYFRQAKNGLYIRMALLKLLLLGW	At3g20330	NP_001333708.1	10	49	10	2.162	0.0139417	5	3	8	23.1.1.2	nucleotide metabolism.synthesis.pyrimidine.aspartate transcarbamoylase	Cp	29	3	-	Cp	Cp	M	96.6	plastid stroma	plastid	plastid
	Solyc01g094500	PYRD	Riboflavin biosynthesis protein ribD (AHRD V1 ***- B6TRH4_MAIZE); contains Interpro domain(s) IPR004794 Riboflavin biosynthesis protein RibD	MYCCPLSPSKQRPYSTAHFLSPSATYFGICNASKRLSISLINLGNESEQSVTTSRLNYGFRLATKRVSISLTSSGNGDRLVNVRCGELAVEHDDGFYIrRNACVEIARKAVGHTSPNPMVGCVIVKDGKIVGEGFHPKAGQPHAEVYALRDAGDLAEKATAFVSLEPCNHYGRTPPCTEALIKAKVKKVVVGMVDPNPIVASTGVSRLRDAGIEVITGVEEELCRKLNEAYIHQMLTGKPFVTLRYSLSVDGGLSDQLGAEVTESGGYYSKLLQEYDAVVVSSFLLSTKHSVLSSKEPGAKQPLQIVLAKSSGSLQLPAVTAISSKTIIFSDEDIVMELEASQRGIETVVFDRMNLTAILEHCKRQGLCNVMLDLRGNSAEFEEILQEGFEQNLFQKVI…	At4g20960	XP_004229938.1	3	9	3	0.52	0.00335323	4	3	7	23.5.3	nucleotide metabolism.deoxynucleotide metabolism.cytosine deamise	Cp	84	4	Cp	-	Cp	Cp	100	plastid	plastid	-
	Solyc04g056540	PYRR	Riboflavin biosynthesis protein RibD (AHRD V1 ***- B2J2B9_NOSP7); contains Interpro domain(s) IPR004794 Riboflavin biosynthesis protein RibD	MAHLLGGLATPFLCKPISASSSSNYSYTSASSFDSLYIKRAAELADKSAGFTAPHPNFGCVIAVPNgranaTVVGEGYLYAEGTIPAEVQAVEAAGEQCRGATAYLNMEPGDCHCDTSAVSALIKAGISRVVVGIRHPLQHLRGNAIHALRSEGLQVDVLGEDTQSKTIEDAIKSCLLVNAPLLYRAACQVPFSVLKYAMTLDGKIAASSGHASWISSKKSRTRVFEMRGRSDAVIVGGNTVRKDNPRLTVRHGGNADHLPrRNAVVLSQTLDLPEEAHLWNVSEVPTIVATQRGAKRSFQRLLASKGVEVVEFDILDPRDVMGYLYDRGYLSVLWECGGTLAASAISSGVIHKVHAFVAPKIIGGKNAPSPVGELGMVEMTQALELIDVCYEQIGPDI…	At3g47390	XP_004237587.1	4	12	4	0.65	0.00419154	5	2	7	23.5.3	nucleotide metabolism.deoxynucleotide metabolism.cytosine deamise	Cp	18	5	Cp	Cp	Cp	Cp	98.8	stroma	-	-
	Solyc02g093460	-	tRNA pseudouridine synthase B (AHRD V1 *-*- D0MI93_RHOM4); contains Interpro domain(s) IPR020103 Pseudouridine synthase, catalytic domain	MAKSVVIPRMSLIFLRSKSISQPRTVFFPSMLNSLLLKSHSLHFFSTTSTPYPLQYEMIISRPANPPSPTLKSRQQRFLPKSKPNDSEPLPGSELGFDDWVDRKLNLKSSSPQAEPQPEEPNSGIMEMDKGKRKYYNKRRKRMFGGSDSEDENNRDKDNELVELKQEVVELPTLHKKEEELYFYDNFAYPWEKDKHYKMVYQLEKKFFPDQGFDKAFLDPGQSNENVNRSKKKLGKKENLIEKDIDGGDGKSLIFFEEEEKSVSSETKKEAKVDVAEKKVEDFFKCLKKVPNKENGVVSAEPFLATRSTGLPPKWDSPGGTVVLVNKPKGWTSFTVCGKLRRLTKVKKVGHAGTLDPMATGLLIVCVGKSTKIVDSYQGMTKGYSGIFRLGEATSTWDA…	At5g14460	XP_004231838.1	2	3	2	0.16	0.00103176	2	0	2	23.5.2	nucleotide metabolism.deoxynucleotide metabolism.pseudouridine synthase	Cp	70	3	Cp	ER	Cp	M	49.2	plastid stroma	-	-
	Solyc12g014190	-	tRNA dimethylallyltransferase 9	MISTVGTGGVRISSYLRLPYTVETLLRRRRLFTSCSASSTKEKVIVISGPTGAGKSKLALELAKRINGEIISADSVQVYRGLDVGSAKPSFDERKEVVHHLVDILHPSEDYSVGQFFEDARQTTRDILDRGRVPIVAGGTGLYLRWFIYGRPDVPKASREIAAEVDSELASLQNDEDWNAAVQLLVKAGDPGAQSLPANDWYRLRRRLEIVKSTGSPPSAFEVPYNSFREQLVSGQIDAADVKTSDDKLQQNEIKDLDYDFLCYFLSTSRIDLYRSIDFRCEDMLLGADGILSEARWLLDVGLLPNSNSATRAIGYRQAMEYLLRCREDGGWSSAGDFHDFLSEFQKESRNFAKRQMTWFRNEQIYEWIDASKPLEKVLSFICDSYNSQDGHLQMPESL…	AT1G68460	XP_004251888.1	2	6	2	0.222	0.00143157	5	2	7	50.2.5	Enzyme classification.EC_2 transferases.EC_2.5 transferase transferring alkyl or aryl group, other than methyl group	M		3	Cp	M	Cp	M	99.4	plastid	plastid	-
Pyrophosphatase	Solyc01g106430	PPA6A	Inorganic pyrophosphatase family protein (AHRD V1 **** D7M262_ARALY); contains Interpro domain(s) IPR008162 Inorganic pyrophosphatase	MAAARIMVSASNTLTASLLSKGPLRRPNNFSLCFRNGPVQKKRLFTCSAIYNPQIQTIEEGQPETLDYRVFFADNSGKKISPWHDIPLHLGDGVFNFVVEIPKESSAKMEVATDEQHTPIKQDTKKGKLRYYPYNIHWNYGLLPQTWEDPTFANTEVEGALGDNDPVDVVEIGDSRGKIGQVLKVKPLAALAMIDEGELDWKIVAISLDDPRASLVNDVDDVEKHFPGTLTAIRDWFRDYKIPDGKPANRFALGNKPANKDYALKIITETNESWAKLVKRSIAAGELSLV	At5g09650	XP_004230656.1	11	175	10	60.054	0.387259	5	3	8	23.4.99	nucleotide metabolism.phosphotransfer and pyrophosphatases.misc	Cp	48	3	Cp	Cp	Cp	M	59.8	thylakoid-peripheral-stromal-side plastid stroma	plastid	plastid
	Solyc10g047950	PPA6B	Inorganic pyrophosphatase family protein (AHRD V1 **** D7M262_ARALY); contains Interpro domain(s) IPR008162 Inorganic pyrophosphatase	MAAASATVRVSANNTITASLISKSPLQKPSIFHLCFRNGAAAAQRNRLFSCSAIYNPQIQIKQHGQPETLDYRVFFAEDSGKKVSPWHDIPLNLGDGVFNFIAEIPKESSAKMEVATDEQYTPIKQDTKKGKLRYYPYNINWNYGLLPQTWEDPSLANAEVEGAFGDNDPVDVVEIGESRAKMGQVLKVKPLAALAMIDEGELDWKIVAISLDDPRASLVNDIDDVEKHFPGTLTAIMDWFRDYKIPDGKPANKFGLGNKPANKDYALKVIMETNESWAKLVKRSIPAGDLSLI	At5g09650	XP_004248784.1	9	57	8	5.661	0.0365051	5	3	8	23.4.99	nucleotide metabolism.phosphotransfer and pyrophosphatases.misc	Cp	50	2	Cp	Cp	Cp	Cp	95.7	thylakoid-peripheral-stromal-side; plastid stroma	plastid	plastid
Salvage	Solyc08g079820	NUDX14	Nudix hydrolase 14 (AHRD V1 ***- B6TUU0_MAIZE); contains Interpro domain(s) IPR000086 NUDIX hydrolase domain	MRVTVPRFGLPFLKPLYEFPFSSSSSNLWPRNCSGSFSVKMSTTPPSQIADIINLPTQLDQPVSVVAAPGVSDTHFRNAIESSLFKQWLKNIQTETGLLANGALSLKQVLIQGVDMFGERLGFLKFKADIIDKETGQKVPGIVFARGPAVAVLILLDYEGETYAVLTEQVRVPVGRLILELPAGMLDDDQGDFAGTAVREVEEETGIHLNVHDMVDLTAFLDASTGGRVFPSPGGCDEEMSLFLYRGNVSKEKIQQLQGKETGLRNADHGELIKVHVVPYDKLWRATADAKALTAIALYEMAKRDGLLS	At4g11980	XP_004245683.1	6	16	6	3.329	0.0214671	5	2	7	23.3.3	nucleotide metabolism.salvage.NUDIX hydrolases	Cp	66	5	Cp	possibly ER	Cp	V	50.6	plastid stroma	plastid	-
	Solyc07g009170	NUDX20	Nudix hydrolase 20 (AHRD V1 ***- B6TUU0_MAIZE); contains Interpro domain(s) IPR000086 NUDIX hydrolase domain	MSCNYLYRSVSHRLPNFICYTPIAPTILSLKSPFCPSRRRRQLRSFSISAGNSFTWDDVFRVPESPQNDDSALSGFFDKIKLCNRDLEKQCEFMPFVIEDRIIGYVHHGFADFLKPFQNVFIFPLDNTFGSHFGCYCTLHPNLSTPNDRTKAVANVVKSLGELIPGIRNELFPVASAFGEQIFFSLERAAAPYFGIKAYGVHMNGYLEKDGQEFLWLGKRSEQKATYPGMLNADHLVAGGLPHDISCGENLIKECEEEAGIPRSISHTARPVGAVSYIDIEGYRMKRDVLFCYDLKLPDSFIPHNEDGEVESFQLVPVTKVANIIRNTSFFKANCNLVITDFLFRHGHIKPEVFGYLKLLQSLRSGHCS	At5g19460	XP_004242847.1	2	16	2	0.719	0.00463648	5	2	7	23.3.3	nucleotide metabolism.salvage.NUDIX hydrolases	M	46	4	Cp	possibly M	Cp	C	92.7	plastid	plastid	-
	Solyc03g062830	NUDX23	Nudix hydrolase 23 (AHRD V1 *-*- B6TED1_MAIZE); contains Interpro domain(s) IPR000086 NUDIX hydrolase domain	MLKAIQIVGSSSGFASYRFRKPQPNSAFSLISRKPILTTSETLLLPASQLHSHKSCFRDFRMSSTHSKSSSSSSVAVQSTGNIRKINFCQFCGGPNKHEIPDGEEKVRAICTHCGKITYENPKMVVGCLIEHDKKILMCRRKIHPSYGLWTLPAGYMEIGESAAEGAIRETWEEANAEVEVQSLFAQLDIPLIGQTYMIFLAKLKNPHFSPGPESSECQLFELDDIPFDSLAFSSMLVSLNLYIEDIKVGRPKFHYGVINKRPGTSPSDIHAYTLDFHMQS	At2g42070	XP_004234808.1	1	7	1	0.259	0.00167017	3	2	5	23.3.3	nucleotide metabolism.salvage.NUDIX hydrolases	Cp	46	1	Cp	M	Cp	M	59.5	plastid stroma	plastid	-
	Solyc11g006580	NUDX26	RNA pyrophosphohydrolase (AHRD V1 ***- C9CZW5_9RHOB); contains Interpro domain(s) IPR000086 NUDIX hydrolase domain	MALFCRSIVSNFTLPRLPLQLVPLNTTVPFPHCPSKYHQITALPLVLRSKTASFASLPSPPPSSTMENPPEGYRRNVGICLMNPSNKKIFAASRLDIPSAWQMPQGGVDDNEDPTNAAIRELREETGVTSAEIVAEVPHWVTYDFPPEVREKLRHQWGSDWKGQAQKWFLFKFTGKDEEINLLGDGTEKAEFGEWLWISPEQVIELAVDFKKPVYREVLSVFSQHFQ	At3g10620	XP_004249945.1	3	12	3	2.162	0.0139417	4	0	4	30.4.3	signalling.phosphinositides.bis(5-nucleosyl)-tetraphosphatase	M	15	4	Cp	M	Cp	V	67.3	plastid	plastid	-
	Solyc09g011300	UPP	Uracil phosphoribosyltransferase (AHRD V1 **** B6U5U2_MAIZE); contains Interpro domain(s) IPR005765 Uracil phosphoribosyl transferase	MACHLFIYTHPHLRLPPDPPLTLQSSSSSSAASYCRQNLPTLNFHYKKGFNFYTGRKRVVCSMATENKVISGDRMLVFVPPHPLIKHWVSVLRNEQTPCPVFKNAMAELGRLLIYEASRDWLPTITGEIQSPMGIASVEFVDPREPVAIVPILRAGLALAEHATSILPATKTYHLGVSRNEETLQPSVYLNKLPDKFPEGSRVIVVDPMLATGGTIVAAIDLIKERGVDNSQIKVVCAVAAPPALTKLSEKYPRLHVYAGILDPTVNEKGFIIPGLGDAGDRSFDT	At3g53900	XP_004246433.1	8	51	8	3.833	0.0247172	5	3	8	23.3.1.3	nucleotide metabolism.salvage.phosphoribosyltransferases.upp	Cp	60	5	Cp	possibly Cp	Cp	Cp	74.8	plastid stroma	plastid	-
Unknown function	Solyc01g097820	-	Protein of unknown function DUF2358 - NTF2-like superfamily- possible adenine phosphoribosyltransferase-like protein	MKKMLSYIIPKTMGYMKPEIRQRKMAGMCCYSSLSQTLIKKKLQGGFYCCSPAPNNQKVKTQTPKLLKIAVSGVTELLRLLSSSSTNRLGISDDEGGGEPLVYNVEDVLKIIKLDYEKAYFVTGLFTSGIYAEDCVFEDPTIKFRGRDLYSRNLQLLVPFFDSPSIKLEKIEKGNDSGVIVAYWKLRTSLKLPWQPLISVDGKTVYDLDEQLKIVKHVESWNISALEAVGQIFTPGLRSSGSYSLRTA	At3g04890	XP_004230122.1	2	3	2	0.52	0.00335323	3	0	3	35.2	not assigned.unknown	-	-	3	-	possibly M	Cp	Cp	88.92	plastid	plastid	-
	Solyc09g098530	-	Uncharacterized Protein - possible phosphoribosylformylglycinamidine synthase	MNLSLYTISLSPSNSIRFTSPKRCCHYHVISRRVSPSPYRRRHLRRRRFPFLKKFSPEDTPPSDQNLHFVLTVDNLPTKSFYSIKDLIHLKLREFLHSGRAAIEDLQTLIRIDTDAGRVSFSCTRSTVKFLATLLVSTFLLIFTLRAILNLVRRIPLNTGNNNVELVYKRDRSLGGREVLVAKNETPTLDRKKPNVLDRDEGNSNWDLDTPISFSRRRKKKSSVEQLPKWWPVSTSGSDQVGTENQEEYQRMADRLIRAILDNRMTGKDILADDIIQLRRIGRISNVKVSFDTENARDTLFRVAVDFILNYCESTASQSAFVLIDGEEAQNFVAGLADNVGLESTRAARMVSAAVAARTRSRFLQAWALEIQGKHSEAVVELFKICVIHQIFPPEEFSP…	At2g43235	XP_004247979.3	1	2	1	0.093	0.000599712	2	1	3	35.1	not assigned.no ontology	Cp	30	1	Cp	Cp	Cp	N	35.3	plastid nucleoid	-	-
	Solyc02g068700	HINT2	Histidine triad (HIT) protein	MAAMSSLTLLRGPSLVKALGFIKTSNYIPRIVPASRYPLQSQRSYVASAHDEEAAARAAAVDTGAPTIFDKIIAKEIPASVVYEDQKVLAFRDINPQAPVHVLIIPKSRDGLTELGKAEQRHEDILGNLLYAAKIVAEKEGIVDGFRVVINSGPSACQSVYHLHLHVLGGRQLKWPPG	At1g31160	XP_004233245.1	7	36	7	3.924	0.025304	5	3	8	29.4	protein.postranslational modification	M	58	4	-	possibly M	Cp	Cp	98.42	plastid stroma	plastid	-
A Names of tomato proteins were based on the literature, NCBI annotation (identified in BlastP searches), and/or SolyGenomics descriptor. In a small number of cases, tomato protein names were assigned based on NCBI annotations and the Arabidopsis homolog.
B Some Sol Genomics descriptors were updated when NCBI annotations and Arabidopsis gene annotations were aligned.
C Target P's subcellular locations are: chloroplast (Cp), mitochondria (M), secretory (S), and no predicted location is indicated by a dash (-).
D ChloroP was used to predict the presence of a chloroplast transit peptide (Y) and the lack of a predicted transit peptide is indicated with a dash (-).
E Predotar's predicted subcellular locations were: chloroplast/plastid (Cp),endoplasmic reticulum (ER) or mitochondrion (M). For proteins with localization predictions that were less clear, Predotar provided categorized of possibly Cp, M and ER. Proteins with unresolved locations or that did not have a homolog detected by Predotar are indicated with a dash (-).
F WoLF PSORT's and YLoc's predicted subcellular locations were: chloroplast/plastid (Cp), cytosol (C), cytoskeleton (Cy), endoplasmic reticulum (ER), extracellular (EX), golgi apparatus (G), mitochondrion (M), nucleus (N), peroxisomes (P), plasma membrance (PM), and vacuole (V). Proteins with no chloroplast location in WoLF PSORT are indicated by not Cp.The number of proteins predicted to be in t…

## Sheet: Table S8D. Cofactors-Vitamins
Table S8D. Cofactors and Vitamins
Gene and protein descriptors							ProteomicsA								Bin codes		Algorithms								Databases
Category	Tomato Gene ID	Gene nameB	DescriptionC	Protein Sequence	Arabidopis homolog	Tomato proteinB NCBI accession	Peptides	PSMs	Unique Peptides	emPAI	Mol%	Acetone samples	Gel samples	Total	Bincode	Name	TargetP D ver.1	Transit peptide length	TargetP (reliability class)	ChloroP E	Predotar F	WoLF PSORT G	YLoc G	YLoc % Confidence	PPDB	SUBA4	plprot
[Fe-S] clusters	Solyc01g100410	ISCA-like	Iron-sulfur assembly protein IscA-like 2 (NCBI); Iron-sulfur cluster insertion protein ErpA (AHRD V1 ***- C8Q1G7_9GAMM); contains Interpro domain(s) IPR016092 FeS cluster insertion	MLSSSSSTSMIRRVVPFFTARIRQNYRLLNSSASALSQPQSQSQSQVEATDSVVMTENCVRRIKELQAGEHKEKMLRLSVEAGGCSGFQYEFSLDDKTNSDDRIFEHDGVKLVVDNVSFDFVKGATVDYVEELIRSAFQVSTNPSAVGGCSCKSSFMVKQ	At5g03905	XP_004230302.1	1	1	1	0.292	0.00188297	1	0	1	18.7	Co-factor and vitamine metabolism.iron-sulphur clusters	Cp	32	3	Cp	M	Cp	M	99.1	plastid stroma	plastid	-
	Solyc12g015910	SUFE	Cysteine desulfuration protein SufE (AHRD V1 *-*- D3IBF0_9BACT); contains Interpro domain(s) IPR002634 BolA-like protein	MSISTKIPHPLHHPNSPYPKSSKSSFLYSKPTKLAFFRSITIERISTKSVSATPAAAGEASSSSLQPIEELPTKLQEMVKLFQAVEQPKAKYEQLLFYGKNLKPLDAQYKTSENKVQGCVSQVWVRAYFDSEKNVVFEADSDSVLTKGLAALLVQGLSGRPVEEILKVSPDFAVLLGLQQSLTPSRNNGFLNMLKLMQKKALQLYVEEAEKGANSGQSEVSNASSTESLGVNGNGNVESVASPEVNGNNVAVGASDDGVLRSRGMRIKQKLEKELRPVELEVEDISYQHAGHAGIRGSDGETHFNLKVVSEEFEGKSLVKRHRMIYGLLQDELQNGLHALSIVAKTPSEVGSS	At4g26500	XP_010313955.1	4	11	2	0.778	0.00501695	5	3	8	18.7	Co-factor and vitamine metabolism.iron-sulphur clusters	Cp	54	1	Cp	possibly Cp	Cp	Cp	87.7	plastid	plastid	-
	Solyc03g112060	QS	Quinolite synthase A (AHRD V1 *-*- DA_CYAP4); contains Interpro domain(s) IPR003808 Fe-S metabolism associated SufE	MDAVNLAMKSSSSSFFLKTPCLFSSTKPISRAPSSVFTLPSTFRPLVKCIQAPFLPSPLNPDSKKPLNSVFTCSAVTSFPSQSHPNVHSGFSSAKLKLLISEFQSLIEPIDRVKRLMHYASLLPSMDGSVKTTENRVPGCTAQVWLHVSLDEEGKMRFLVDSDSEITKGFCACLVWLLDGAAPDEVLALKTEDLNALNAVGLNGKGSASRVNTWHNVLVSMQKRTRAAVAERDGKPRSELFPSMVVTADGIQPKGSYAEAQARFLFPDESRVQELVNALKEKKIGVVAHFYMDPEVQGVLTAAQKFWPHIHISDSLVMADSAVKMAKSGCQYITVLGVDFMSENVRAILDQAGFPEVGVYRMSDEHIGCSLAEAASSPSYMDYLTTASVSSPSLHVVYI…	At5g50210	XP_004236277.1	7	23	7	1.555	0.0100274	5	2	7	18.7	Co-factor and vitamine metabolism.iron-sulphur clusters	Cp	35	2	Cp	possibly Cp	Cp	Cp	70.5	plastid stroma	plastid	-
	Solyc06g048540	ABCI6 NAP7	FeS assembly ATPase SufC (AHRD V1 **** B5W7S4_SPIMA); contains Interpro domain(s) IPR010230 ATPase SufC, SUF system FeS cluster assembly	MAVFSPTCSSTSPLLSFRNNISFFPSHRPSFPGVRCTLTVKATVSVESPSSSSTDCRDDSPKVLLEVRDLSAVIVESKQQILNGVNLTVRQGEVHAVMGKNGSGKSTFAKVLVGHPDYEITGGSVSFKGENLLEMEPEERSLAGLFMSFQSPVAIPGVSNIDFLNMAYNAQRRKLGLPELGPIEFYGYIAPKLELVNMKIDFLNRNVNEGFSGGERKRNEILQLAVLGADLAILDEIDSGLDVDALRDVAKAVNGLLSPKNSVLMITHYLRLLEFIKPTYIHIMEKGRIVKTGDISIAKVLEKEGYKAISGP	At3g10670	NP_001353544.1	11	61	11	5.813	0.0374852	5	3	8	29.8	protein.assembly and cofactor ligation	Cp	35	1	Cp	Cp	Cp	Cp	100	plastid stroma	plastid	-
	Solyc02g080440	ABCI8 NAP1	FeS assembly protein SufB (AHRD V1 ***- Q3MG36_AVT); contains Interpro domain(s) IPR010231 SUF system FeS cluster assembly, SufB	MASLLTNGISHFCPQSIAEQPKLPKGYNFLPNSPGPKISNPGNFKIKAADAKATVEVPGKESSLSISNEGDPLQKFLKRDYKWGFNENIESFALPKGLSEDTIRLISSRKNEPEWMLEYRLKSYEKFVKMKEPKWSDNQYPEIDFQNICYYSEPKKKPTLDSLDEADPELVRYFDKLGIPLNERNRLANVAVDAVLDSVSIATTHRKTLEKSGVIFCSISEAIREYPDLVRKYLFRVVPPEDNFYAALNSAVFSDGSFVYIPKNTKCPMQISTYFRINAMETGQFERTLIVADEGSFVEYLEGCTAPSYDTNQLHAAVVELYCHEGAEIKYSTVQNWYAGDEEGRGGIYNFVTKRGICAGARSKISWTQVETGSAITWKYPSVVLEGDESVGEFYSVAL…	At4g04770	XP_004232719.1	6	12	4	0.701	0.00452041	4	0	4	29.8	protein.assembly and cofactor ligation	Cp	47	5	-	possibly Cp	not Cp	Cp	65.6	plastid	plastid	-
	Solyc03g031700	ABCI8 NAP1	ABC transporter FeS assembly protein SufB (AHRD V1 ***- C7JBP7_ACEP3); contains Interpro domain(s) IPR010231 SUF system FeS cluster assembly, SufB	MASLVTNGISCFSPQPITEQPKLSKGSQFLLKLANPRNPNSRILKVKAAELSYEATIDSPGKESSVSTSNENDPLQKFLKRDYKWGFNQEIDSFSLPKGLSAETVKLISGRKNEPNWMLEFRLKSYEKFLKMKEPKWSDNRYPEISFQDICYYSEPKKKPTLNSLDEADPELIKYFDKLGVPLNERNRLANVAVDAVLDSVSIATTHRKTLEKAGVIFCSISEAIREYPDLVKKYLGRVVPPEDNFYAALNSAVFSDGSFVYIPKNTRCPMQISTYFRINAMETGQFERTVIIAEEGSFVEYLEGCTAPSYDTNQLHAAVVELYCHEGAEIKYSTVQNWYAGDEEGRGGIYNFVTKRGICAGARSKISWTQVETGSAITWKYPSVVLEGDESVGEFYSV…	At4g04770	XP_004234480.1	6	12	4	0.778	0.00501695	3	2	5	29.8	protein.assembly and cofactor ligation	Cp	47	2	Cp	Cp	Cp	Cp	70.6	plastid	plastid	-
	Solyc12g007010	HCF101	Cytosolic Fe-S cluster assembly factor NUBP2 homolog (AHRD V1 *--- NUBP2_NEMVE); contains Interpro domain(s) IPR019591 ATPase-like, ParA/MinD	MTLLQAPSSPTLTFHQYCTSQSKAGLYVAEKSFIQSTLSGSCFLSSQRQVKGLNFSYTCSRLSSVTAKAASNGACAPSVSGQTADSEVLKALSQIIDPDFGTDIVSCGFVKDLLVDENLGEVSFQLELTTPACPIKDMFEQKANEVVAELPWVKKVNVTMSAQPAKPIYAGQLPAGLQTISNIIAVSSCKGGVGKSTVAVNLAYTLADMGARVGIFDADVYGPSLPTMVSPENRILEMNAEKRTIIPTEYMGVKLVSFGFAGQGRAIMRGPMVSGVINQLLTTTEWGELDYLVIDMPPGTGDIQLTLCQVVPLTAAVIVTTPQKLAFIDVAKGVRMFSKLKVPCVAVVENMCHFDADGKRYYPFGRGSGSQVVQQFGIPHLFDLPIQPALSASGDSGMP…	At3g24430	NP_001311103.1	7	19	7	1.448	0.00933745	5	3	8	29.8	protein.assembly and cofactor ligation	Cp	66	3	Cp	Cp	Cp	M	51.9	plastid stroma	plastid	-
	Solyc01g079220	NFU1	NFU1-like; may be involved in iron-sulfur cluster assembly	MAHLAAMGVSQISSSIYMPELPLKSQNPQPSSIFLKRIGVAHKRFNLVKATVDGSPVPAPSPGLYSAKQFELTPENVDMVLEDVRPYLISDGGNVEVVSVEDGVVSLQLQGACESCPSATTTMKMGIERVLKEKFGEAIKDIRQVYNEQVVETTAEAVNAHLDILRPAIKNFGGSVEVLSVEEGNCNVKYVGPESIGSGVKAAIKEKFPDILNVVFTD	At4g01940	XP_004229373.1	2	8	2	0.931	0.00600357	5	2	7	29.8	protein.assembly and cofactor ligation	Cp	49	3	Cp	Cp	Cp	Cp	96.7	plastid stroma	plastid	-
	Solyc01g103710	NFU2	NifU DOMAIN PROTEIN 2	MQSAMLLNPPTPSSSYVSRSFQTLDSPSSSSSCSPSSSTATLFLPPLPLEISGFFGTRVSSWTRPNSSPRSLRRASQFRVVKAVATPNSAVEPNSSLELPLTSENIESVLDEIRPYLISDGGNVALHEIDGNVVKLKLQGACGSCPSSVTTMKLGIERRLMEKIPEIVAVEAVPDEETGLELNEENIEKVLEEIRPYLVGAAGGSLELVAIEEPIVKVRITGPAAGVMTVRVAVTQKLREKIPSIAAVQLLQ	AT4G25910	XP_004230462.1	1	3	1	0.585	0.00377238	3	0	3	7.12.1.2.2	'Coenzyme metabolism.iron-sulfur cluster assembly machinery.plastidial SUF system.transfer phase.scaffold protein *(NFU1/2/3)'	Cp	na	1	Cp	Cp	Cp	M	78.8	plastid stroma	plastid	-
	Solyc08g007010	ABC17 NAP6	non-intrinsic ATP-binding cassette (ABC) proteins	MALSALSPTFSTNPSASSTSLSKTRRITQKNPKFSVFTTPKFTPISALSDPYVLQIAETLEDSLPSTSSTPLQKLRISSSDTLLSTPWPSRKDEPFRFTDTSFIKNSRIEPIQPPSLSSLDVSVDTLLPTLSIVDGYIMDSLSQLNEFPSGVYVGSLLRVDSEAILKRVSEYEFSSKGDLFWLLNGVGTPDVVLVYVPEGCKVETPLLLRYISVEGSDKESKALPFSNPRVLVLVEKGGEISIVEEYVGGDTDKCYWTNSVMEVVVGEGAKVSHSYIQNQSFNAAHIKWTWVQQESTSKYEHIEVSTGGKLSRHNIHIQQVGPDTVTELSTFHMCISDQTQDLHSKLVLNADHPRGVSQQIHKCIVAHSSGQAVFDGNVQVNRYAQQTDAGQLTRSLLL…	At1g32500	XP_004244542.1	10	46	10	2.831	0.0182558	5	3	8	34.16	transport.ABC transporters and multidrug resistance systems	Cp	46	2	Cp	Cp	Cp	Cp	86.8	plastid stroma	plastid	-
	Solyc03g007030	NEET	NEET protein, CDGSH iron sulfur domain-containing protein 1 (AHRD V1 ***- B5X1R9_SALSA); contains Interpro domain(s) IPR006622 Iron sulphur domain-containing, CDGSH-type, subfamily	MASTTSIIQPGFSCGGALSSFTAKPRRVVMVRAQAINPDIKKDEAKVVDSVLVTELSKPLTAYCRCWRSGTFPLCDGSHVKHNKETGDNVGPLLLKKQ	At5g51720	NP_001309349.1	2	5	2	3.642	0.0234855	5	2	7	35.2	not assigned.unknown	Cp	32	3	Cp	possibly Cp	Cp	M	81.4	plastid	plastid	-
Riboflavin	Solyc04g008990	RIBF1	Flavin adenine dinucleotide synthetase 1; Riboflavin biosynthesis protein RibF (AHRD V1 *-** B1BWX1_CLOPE); contains Interpro domain(s) IPR014729 Rossmann-like alpha/beta/alpha sandwich fold	MLSGSRCNFHCSAHQFATILAASTLTSESSFKNFRIRLRSRNSNSSCLSNKVCDFGVNCVQPKSSDTQSSLLSETLSQSGTDEEPPSERLPILTGGIVALGKFDALHIGHRELAIQAAKRGIPFLLSFVGMAEVLGWEPRAPIVAECDRKRILSSWAPYCGSIMPRELQIDFSKVRYLTPCQFVEKLSKELGVRGVVAGENYRFGYRAAGDASDLVKLCEEYGLEAYIINSVMDTNQISGDLNSKDGKERGQVSSTRVRYALHKGDMKYVSELLGRNHRLILMMEDQERFTSERNRLSAPKSCLLNLAPKEGLYENCSVLIDKSVIPCRVIVDTTYIHLESYEVASFSCVTSQDLKILGIDFGSPKLEGVQIL	At5g23330	NP_001335316.1	6	8	6	0.995	0.00641628	4	0	4	18.3	Co-factor and vitamine metabolism.riboflavin	Cp	58	2	Cp	-	Cp	Cp	84.9	plastid	-	-
	Solyc11g010300	RIBA1	3 4-dihydroxy-2-butanone 4-phosphate synthase (AHRD V1 ***- D1VQB4_9ACTO); contains Interpro domain(s) IPR000422 NADHBP synthase RibA1	MASIQNSMVFSHLRSNADHGLYFINPTTTNYKSDLSSLSFTRKFPFSFKSGRGLLRATLLSGEDDILSCFNNQGAERGSFVNHGAEQTIIKQQPGETAFETPATVITPNSGFLSGVDEFDLNADHAVEGFSSIPEAIEDIRQGKMVIVVDDEDRENEGDLIMAAQLVTPEAMAFIVKHGTGIVCVSMKGEDLDRLQLPLMVPPKENEEKLSTAFTVSVDAKYGTTTGVSAHDRAKTVLALASADSKPEDFNRPGHIFPLKYREGGVLKRAGHTEASVDLAVLAGLDPVAVLCEIVDDDGSMARLPRLRQFAEAENLKIVSIADLIRYRRKREKLVDLAAAAPIPTTWGPFKAYCFKSVLDGIEHIAMVKGDIGDGKDVLVRVHSECLTGDIFGSARCDC…	At5g64300	XP_004250121.1	8	28	8	1.424	0.00918269	5	2	7	18.3.1	Co-factor and vitamine metabolism.riboflavin.GTP cyclohydrolase II	-	-	5	Cp	possibly Cp	Cp	Cp	99.4	plastid	plastid	-
	Solyc01g105560	RIBA1	3 4-dihydroxy-2-butanone 4-phosphate synthase (AHRD V1 ***- D7CLR6_SYNLT); contains Interpro domain(s) IPR000422 NADHBP synthase RibA1	MASINISFPSTTFHSRSQANFKLFSGLHSGDVVSLNGVSSGSFIRLNARPHLTIKSDFKITSALLSGEGDIRFQSRGEKTLFSSLSTGTETQPDAVTFATLEADGVPTTSGFLSDDDECDLDRPTEGFSSVPEAIEDIRQGKMVLVTDDEDRENEGDLVMAASKATPEAMAFFVKYGTGIVCVSMTEEHLERLQLPLMVNDKKNEEKLCTAFTVSVDAKHGTTTGVSAHDRATTVLALASGDSKPEDFNRPGHIFPLKYREGGVLKRAGHTEASVDLAVLAGLDPVGVICEVVDDDGSMARLPMLRQFAKEHNLKIISVADLIRYrRNAKTDQLVEHASAARIPTMWGPFTAHCFKSIIDGIEHIAMVKGDIGDGQDILVRVHSECLTGDIFGSARCDC…	At5g64300	NP_001234776.2	13	44	13	2.728	0.0175916	5	3	8	18.3.1	Co-factor and vitamine metabolism.riboflavin.GTP cyclohydrolase II	Cp	45	1	Cp	Cp	Cp	Cp	100	stroma	plastid	-
	Solyc11g073160	RIBA3	GTP cyclohydrolase II/3 4-dihydroxy-2-butanone 4-phosphate synthase (AHRD V1 **-- Q6A4W9_MALDO); contains Interpro domain(s) IPR016299 Riboflavin biosynthesis protein RibA	MDCVLFNQLLVPRIFISSNVHHQSFGHSHNNNNNIVGIGQYRKKLSSPNLNTWTCKAAETPFENGSLLSAEITIDFFVSETEGDPDCPTKGYSSIGEALNALSQGKVGIISVGMKEEDLERLNLPLMSPEKQDESSAPSFTITVDAKKGTSTGVSASDRAKTVLALSSPTSTPEDFIRPGHVFPLKYRNGGVLRRFGHTEASVDLVTSTGLQPVSVLSTIVDKNDGSIASMHILKNLALNADHKIPIVSITDLVRYRRKREKLVERTAVSRLPTKWGLFEAYCYRSKLDGtheIAVVKGDIGNGQDVLVRVHSECLTGDIFGSRRCDCGNQLDLAMQLIEEAGRGLVIYLRGHEGRGIGLGHKLQAYNLQDEGHDTVEANLELGFAADAREYGIGAQML…	At5g59750	XP_004251310.1	4	12	4	0.616	0.00397229	5	3	8	18.3.1	Co-factor and vitamine metabolism.riboflavin.GTP cyclohydrolase II	Cp	78	5	-	possibly Cp	Cp	Cp	98.7	plastid stroma	plastid	-
	Solyc07g054190	-	Riboflavin synthase alpha subunit (AHRD V1 **** A5URX5_ROSS1); contains Interpro domain(s) IPR001783 Lumazine-binding protein	MATISFKFASPSKPSNPSIAPKNPTIFNLLPTPSNPQLKRAFFLKSPAISPIFIRALKPQQCRSSSTPITSLFTGIVEEMGQIKQLGYDKPDSFTMKIQAKLILEDINLGDSISVNGTCLTVAEFDTQKLEFSVGLAPETLRKTSLIELEQGSLVNLERALRPSTRMGGHFVQGHVDGTGEIVELKTEGDSLWVKVKTAKEILRYIVPKGFIAVDGTSLTVVDVVDEEGCFNFMLVAYTQQNVVIPLKKVGQKVNLEVDILGKYVERLLSSGFQQVSDGVNSGVITSRDVRVGEEAAKITQEVNQL	At2g20690	XP_004243342.1	6	21	6	2.455	0.0158311	5	3	8	18.3.2	Co-factor and vitamine metabolism.riboflavin.riboflavin synthase	Cp	55	1	Cp	possibly Cp	Cp	Cp	100	stroma	plastid	-
	Solyc08g015660	COS1	6 7-dimethyl-8-ribityllumazine synthase (AHRD V1 **** Q5ZQU1_TOBAC); contains Interpro domain(s) IPR002180 6,7-dimethyl-8-ribityllumazine synthase	MATTAFVEFSVVVRPQSNFVNTSYLQQLHSHRPFLFLSIPKSTAALSFTQSQGFGCGIERQQCDRRDFVQTSAVRELAGSLISAQGHRFAIVVARFNDLITKKLLEGALNTFKSYSVREEDIDVVWVPGSFEIGVVAQQLGKSRKYQSILCIGAVIRGDTSHYDAVVNAATSGVLSAGLNSGTPCIFGVLTCDTLEQAFDRVGGKAGNKGAEAALTAIEMASLFEHHLKPLQ	At2g44050	XP_004244782.1	3	9	1	2.728	0.0175916	1	0	1	18.3.2	Co-factor and vitamine metabolism.riboflavin.riboflavin synthase	-	-	5	Cp	possibly Cp	Cp	Cp	100	plastid	plastid	plastid
	Solyc12g096590	COS1	Coronatine insensitive suppressor 1; 6 7-dimethyl-8-ribityllumazine synthase (AHRD V1 ***- B2CM14_SOLCH); contains Interpro domain(s) IPR002180 6,7-dimethyl-8-ribityllumazine synthase	MAASAFGQCSLLPRTVSLNPQQSHRQLCSLSFHRQTVNSSLPALSFTQSIGFGSAIERHCVDRNGSDLFKTDAVRQLNGSVISAKGHRFAIVVARFNDLITKKLLEGALETFKNYSVREEDIDVVWVPGCFEIGVTAQLLGKSQKYHAILCIGAVIRGDTSHYDAVVNAATSGVLSAGLNSGTPCIFGVLTCDTLEQAFNRVGGKAGNKGSETALTAIEMASLFEHHLKPSE	At2g44050	XP_004253044.1	3	8	1	1.154	0.00744159	1	1	2	18.3.2	Co-factor and vitamine metabolism.riboflavin.riboflavin synthase	Cp	61	3	Cp	Cp	Cp	Cp	100	plastid	plastid	plastid
	Solyc06g050310	-	5-amino-6-(5-phospho-D-ribitylamino)uracil phosphatase, chloroplastic [Solanum lycopersicum] fro NCBI; Phosphatase/phosphohexomutase HAD superfamily (AHRD V1 **-- B3DWY3_METI4); contains Interpro domain(s) IPR005834 Haloacid dehalogese-like hydrolase	MEATRSCSQAHLPLQSISFPPQFYKKFQFTKSKPSNSHPRLVIAKALGTGDNGDFEHFTATPNKIFMEEAIGAEYGEGFETFRPNGLLKVDVDFLNDRLQEGFLRRIRYAMKPDEAYGLIFSWDNVVADSRALMLDAWNQLASEEGLELPEDDSVQRLLLYATANADHILHKALAGEKNEADQDRLKTRLSHLYQDKLLkinasePIEGLKEWLDAVSTARIPCAVVSSFDRRNMVEALERMGLMKYFQAIVTEEDGMESIAHRFLSAAVKLDRKPSKCVVFEDDPRGITAAHNCTMMAVALIGAHPAYDLGQADLAVGSFSELSVINLRRLYAHKGSNFMDLEKQIAEKAPRRRKLTIDTIF	At3g10970	XP_004240879.1	1	2	1	0.155	0.00099952	2	0	2	35.1	not assigned.no ontology	Cp	43	4	Cp	-	Cp	Cp	42	plastid	-	-
Thiamine	Solyc06g006080	THIC	Phosphomethylpyrimidine synthase (AHRD V1 ***- C7MPZ7_SACVD); contains Interpro domain(s) IPR002817 Thiamine biosynthesis protein ThiC	MASVQTALTSLLCKKGNNNPQVNVPRSSFLPGFDLTGQVAVTGRRETRFNSFSSPRATLTFDPPSTDNKEKTKPKHTVDPNAPDFLPLPPFEQCFPKSSKEYSEVMHEETGHVLKVPFRRIHLSGDEPHFDTYDTSGPQGVNPRVGLPKLRTEWINRREKLGGPRYTQMFYAKQGIITEEMVYCAAREKMDPEFVRSEVARGRAIIPSNKKHPELEPMIVGRKFLVKVNANIGNSAVVSSIEEEVHKLQWATMWGADTIMDLSTGRHIHETREWILRNSAVPVGTVPIYQALEKVNGIAENLSWEVFRETLIEQAEQGVDYFTIHAGVLLRYIPLTAKRMTGIVSRGGSIHAKWCLAYHKENFAYEHWDDILDICNQYDISLSIGDGLRPGSIYDANDT…	At2g29630	NP_001304334.1	2	8	2	0.292	0.00188297	5	1	6	18.2	Co-factor and vitamine metabolism.thiamine	Cp	56	2	Cp	Cp	Cp	Cp	99.9	plastid stroma	plastid	plastid
	Solyc01g103950	TH1	Thiamine-phosphate pyrophosphorylase/thiamine-phosphate pyrophosphorylase (AHRD V1 **-- A9NB66_COXBR); contains Interpro domain(s) IPR004399 Phosphomethylpyrimidine kinase type-2	MAHLCSQVLSTSFFTPKPQIPVLLSPGVACIKSFHQYRFLHVKAMQDGKFATPTSCDESKVRVPHVLTVAGSDSGAGAGIQADIKACAARGVYCSTVITAVTAQNTVGVQGVNIVPEDFVAEQLRSVLSDMPPNVVKTGMLPSTGIVKTLCQSLKEFPVQALVVDPVMVSTSGHTLAGPSILDSFREELLPMADIVTPNLKEASALLGGVPLETIADMRSAAKAIHDIGPRNVLVKGGDLPASLDAVDVFYDGNDFYEFRSSRIMTPNTHGTGCTLASSVAAELAKGSQMLSAVKVAKRYVEAVLSYSKNIAIGGGCQGPMNADHLLKLKSNVQrRNARFDPSDLFLYAVTDSRMNKKWGRSIVDAVKAAIEGGASIIQLREKEVETGDFLEAAKACLK…	At1g22940	XP_004230476.2	4	16	4	0.778	0.00501695	5	1	6	18.2.2	Co-factor and vitamine metabolism.thiamine.hydroxymethylpyrimidine kinase	Cp	23	5	Cp	Cp	Cp	Cp	99.7	plastid mitochondria	plastid	-
	Solyc12g095770		Secondary thiamine-phosphate synthase enzyme [Arabidopsis thaliana]	MLSLSSSSLVSFGGIAKPFSAPVRLKCQYTPLRTTINNPSDSMASPKWAQKTVTLPPQRRGCHLVTSKIMKEINQEIAGFKCGLAHLFLQHTSASLTINENYDSDVREDTETFLSRVVPEGTSAPWKHTLEGPDDMPAHIKSSMFGCNLTIPITDGKLNMGTWQGIWLCEHRDSATPRRIVITLNGM	At1g21065	XP_004253112.1	1	1	1	0.212	0.00136709	1	0	1	35.2	not assigned.unknown	Cp	65	4	Cp	possibly Cp	Cp	Cp	99.3	plastid	plastid	-
Vitamins	Solyc06g063290	-	Pyridoxamine 5'-phosphate oxidase-related FMN-binding (AHRD V1 ***- D8DKZ3_9BACT); contains Interpro domain(s) IPR012349 FMN-binding split barrel	MASSHTLSSSMEAAISSSNRVSRFSETPPVFQSIKPSNRRSICYPKISFSPPSTSSFGGGCSPRLVVSRAELSGESGCEEEDINGLKCDNAFGLVPESTFSLSQDNSDKQEINRNDLNQASKVVSPLEHSTSGGTRAGLFRTPISGGVQSATSAHGLPKPALAVRNLMEQARFAHLCTVMSRMHHRREGYPFGTLVDFAPDSMGHPIFSFSPLAIHTRNLLADPRCTLVVQIPGWSGLSNARVTIFGDVYPLPEDQQEWAHKQYIAKHQQGPSQQWGNFFYFRMQNISDIYFIGGFGTVAWVDVKEYESLHPDKIAVDGGEQYLKELNAIFSKPLKDLLAQETEVDDAALISIDSKGTDIRVRQGAQFNVQRISFEEGHSVETLEEAKAALWKLINGGR…	At1g51560	XP_004241884.1	2	6	2	0.719	0.00463648	3	1	4	35.2	not assigned.unknown	Cp	69	1	Cp	Cp	Cp	Cp	72	plastid stroma	plastid	-
	Solyc03g094175	-	Pterin-4-alpha-carbinolamine dehydratase (AHRD V1 *-** B6T9C1_MAIZE); contains Interpro domain(s) IPR001533 Transcriptional coactivator/pterin dehydratase; RuBisco Assembly	MAAATHLSFSPPISVSSLPLRKPNFVTPNLQTSQSRICTRIRCNTNLLGDFGARDPFPAEVESKFGEKVLGNPDtheKILIPAASALSLANQECTDISPNQTPLSEFEAKQLLFKVVGWRIANEDGVLKLQCTWKLKDFDCGVELINRIGKVVEGTGHLPTLHQLQQSNQVHAELWTPSIGGLSMNDFIIAAKIDQVKTSDLVPRKRVWA	At5g51110	XP_004253324.1	5	15	5	4.623	0.0139417	3	3	6	35.2	not assigned.unknown	Cp	58	1	Cp	Cp	Cp	Cp	99.94	plastid stroma	plastid	-
	Solyc01g103100	PTALR	NADPH-dependent pterin aldehyde reductase	MAIAGTTPSSPFLGHVPFHIGKSSFAQFTHHSLFRGSKTTVKVLLPLGKFTSIWFPQSQRFRQRSRIHATGNPSMRSAGGAIRTLLITGVSRGLGKALALELAKRGHYIIGCARSQDKLNAFQTELASSTNPPSENKHLLMSVDVSLNSSVEEFARAVMEKKGVPDIIVNCAGTINRNNKLWEVPAEEFDSVIDTNLKGTANVLRYFIPLMLEKKQGVIVNMSSGWGRSGAAQVAPYCASKWAIEGLTASVAKELPPGMAAVALNPGVIYTDMLQSCFGNSASLYQTPESWAPKAANMILNLTMADNGASLSV	At1g10310	XP_004230419.1	6	27	6	1.512	0.00975016	5	3	8	26.22	misc.short chain dehydrogenase/reductase (SDR)	Cp	91	2	Cp	Cp	Cp	Cp	99.6	plastid stroma	-	-
	Solyc03g113780	PPOX1	Pyridoxine/pyridoxamine 5'-phosphate oxidase (AHRD V1 *-** Q4C3B6_CROWT); contains Interpro domain(s) IPR000659 Pyridoxamine 5'-phosphate oxidase	MLRKAKRMSCLLSQTLLPSSAANSVCNFKPTIAPHHLLLPRLLGLRPKIGFLGSLRGMATKMDIIQQNPEAISYLNQKEAAQIDEILMGPLGFSVDQLMELAGLSVAAAIAEVYRPSEYSRVLTICGPGNNGGDGLVAARHLYHFGYKPFICYPKRTAKPLYDGLVTQLESLSVPFLSLEDLPKDLSDSFDILVDAMFGFSFHGSPRPPFDDLIQRLVALKLNGDTHQKSPAIISIDIPSGWHVEEGDLSGEGIQPDMLVSLTAPKLCAKRFSGSHHFLGGRFVPPSIRNKFNLQLPAYPGTSMCVRIGKPPKIDISSLRENYISPALLEEEVVADPFDQFQKWFDDAMVAGLKEPNAMALSTTGKDGKPSSRIVLLKGFDKDGFVWYTNYEGRKGQQI…	At5g49970	XP_004236150.1	6	28	6	1.31	0.00844756	5	1	6	18	Co-factor and vitamine metabolism	M	58	5	Cp	M	Cp	M	96.3	plastid	-	-
	Solyc05g008180	QPT	Quinolinate phoshoribosyltransferase; Nicotinate-nucleotide pyrophosphorylase IPR004393 Nicotinate-nucleotide pyrophosphorylase	MFRVLPFTTTVHPCAITAPRLVVKMSAMATKGRTVESLVVKPPAHPTYDLKGVIQLALSEDAGDLGDVSCKATIPVELESEAYFIAKEDGIVAGIALAEMIFAEVDPSLKVEWFIKDGDKVHKGLKFGKVQGKAHNIVIAERVVLNFMQRMSGIATLTKAMADAAHPAYILETRKTAPGLRLVDKWAVLIGGGKNHRMGLFDMVMIKDNHISAAGGVSKALESVDQYLEQNKLQMGVEVETRTLAEVHEVLEYAAQTKTSLTRIMLDNMVIPLSNGDVEVSMLKEAVDLIKGRFETEASGNVTLETVHAIGQTGVTYISSGALTHSVKALDISLKIDTELALEVGRRTKRA	At2g01350	NP_001316455.1	13	55	12	7.913	0.0510271	5	3	8	18	Co-factor and vitamine metabolism	M	14	5	-	possibly M	Cp	Cp	70.92	-	plastid	-
	Solyc05g050530	PPOX2	Pyridoxamine 5'-phosphate oxidase family protein (AHRD V1 ***- Q2JQH5_SYNJA); contains Interpro domain(s) IPR012349 FMN-binding split barrel	MSSSSAPWKQLLLSSINSNSHLKHSTYFQLATVGSNGRPSNRTVVFRGFQDGTDKIQINTDSRSCKIEDLKHCPFAEVCWYFTETWEQFRIHGRVDMIDASNSDPDKLKQRETAWFAGSVRSRLQYLGPTPGLPSLDEQQSHDSLDSSAGPVDAFCLLLLDPEQVDYLNLKSNERLAFTTARSVNVPDERNQLNLKHMRNKVPLPNL	At2g46580	XP_025887012.1	1	1	1		0	0	1	1	18	Co-factor and vitamine metabolism	Cp	29	3	Cp	possibly Cp	Cp	C	0.9864	-	-	-
	Solyc12g019010	MENG	Ubiquinone/mequinone biosynthesis methyltransferase UbiE (AHRD V1 ***- Q0ICA4_SYNS3); contains Interpro domain(s) IPR004033 UbiE/COQ5 methyltransferase	MASLHVPLSSLPRPSFRPTGKLLIRCSADRQALFNRIAPVYDNLNDLLSLGQHRIWKRMAVSWSGAKEGDTVLDICCGSGDLTFLLSEKVGPHGKAVGLDFSNEQLLIASTRQKLRSKTCYKNIKWMEGNALDLPFPDSSFDAVTIGYGLRNVVDRHRAMTEICRVMKPGSTLSVLDFNKSINPLSTTVQEMMIDNIVVPVASGYGLENEYKYLKSSIKDFLTGNELEKLALEVGFSTAEHFEIGFGFMGNLVAIR	At1g23360	XP_004251986.1	1	1	1	0.389	0.00250847	1	0	1	18.5.2.8	Co-factor and vitamine metabolism.folate & vitamine K.vitamine K.2-phytyl-1,4-phthoquinone methyltransferase	Cp	25	5	-	possibly Cp	Cp	M	49.4	plastid	-	-
A Proteins were identified by acetone preparations and/or the gel method. For emPAI and Mol% calculations, only the data from the acetone prepartions were used. Proteins identified solely by the gel method have data for the number of peptides, PSMs and unique peptides.
B Names of tomato proteins were based on the literature, NCBI annotation (identified in BlastP searches), and/or SolyGenomics descriptor. In a small number of cases, tomato protein names were assigned based on NCBI annotations and the Arabidopsis homolog.
C Some Sol Genomics descriptors were updated when NCBI annotations and Arabidopsis gene annotations were aligned.
D Target P's subcellular locations are: chloroplast (Cp), mitochondria (M), secretory (S), and no predicted location is indicated by a dash (-).
E ChloroP was used to predict the presence of a chloroplast transit peptide (Y) and the lack of a predicted transit peptide is indicated with a dash (-).
F Predotar's predicted subcellular locations were: chloroplast/plastid (Cp),endoplasmic reticulum (ER) or mitochondrion (M). For proteins with localization predictions that were less clear, Predotar provided categorized of possibly Cp, M and ER. Proteins with unresolved locations or that did not have a homolog detected by Predotar are indicated with a dash (-).
G WoLF PSORT's and YLoc's predicted subcellular locations were: chloroplast/plastid (Cp), cytosol (C), cytoskeleton (Cy), endoplasmic reticulum (ER), extracellular (EX), golgi apparatus (G), mitochondrion (M), nucleus (N), peroxisomes (P), plasma membrance (PM), and vacuole (V). Proteins with no chloroplast location in WoLF PSORT are indicated by not Cp.The number of proteins predicted to be in t…

## Sheet: Table S8E-Lipid Metabolism
Table S8E. Lipid Metabolism
Gene and protein descriptors							ProteomicsA								Bin codes		Algorithms								Databases
Category	Tomato Gene ID	Gene nameB	DescriptionC	Protein Sequence	Arabidopis homolog	Tomato proteinB NCBI accession	Peptides	PSMs	Unique Peptides	emPAI	Mol%	Acetone samples	Gel samples	Total	Bincode	Name	TargetP D ver.1	Transit peptide length	TargetP (reliability class)	ChloroP E	Predotar F	WoLF PSORT G	YLoc G	YLoc % Confidence	PPDB	SUBA4	plprot
Acetyl CoA biosynthesis	Solyc02g094640	ACS	Acetyl-coenzyme A synthetase IPR011904 Acetate--CoA ligase	MYQRSVHDPSGFWSDIASEFYWREKWGQQVYCENFDVRKGKIKIEWFKGGMTNICYNCLDRNIESGKGDKTAIYWEGNEPGLDSSMTYNQLLARVCQLANYLKDVGVHKGDAVVIYLPMLMELPIAMLACARIGAIHSVVFAGFSAESLAQRIIDCRPKVVITCVRRGSKIIYLKEIVDSALLESAQKGIVTDVCLTYENESAMKKEMTKWTKGRDIWWQDVILKYPVTCDVEWVDAEDPLFLLYTSGSTGKPKGVLHTTGGYMVYTATTFKYAFDYKPTDIYWCTADCGWITGHSYVTYGPLLNGATVVVFEGAPNYPDVGRCWDIVDKYKVSIFYTAPTLVRSLMREGDEHVSRYSRKSLRVLGSVGEPINPSAWRWFFNVignaDARCPISDTWWQ…	At5g36880	XP_004231738.1	11	67	6	3.217	0.0207449	5	3	8	11.1.8	lipid metabolism.FA synthesis and FA elongation.acyl coa ligase	-	-	2	-	-	Cp	C	93.53	plastid stroma	plastid	plastid
	Solyc12g009400	PDH-E1 ALPHA	Pyruvate dehydrogenase E1 component alpha subunit (AHRD V1 ***- Q5N030_SYNP6); contains Interpro domain(s) IPR017597 Pyruvate dehydrogenase (acetyl-transferring) E1 component, alpha subunit, subgroup y	MAASASSFTANSFSQPINSTRSIDNNNKKTLLGNQLKDSSFFLGSAKKLYMKKPFSSQNSKSRSIGVYAVSEVAKNKKLKTDSPLSNLLITKDEGLELYEDMVLGRAFEDMCAQMYYRGKMFGFVHLYNGQEAVSTGFIKLLKKEDSVVSTYRDHVHALSKGVPARQVMSELFGKTTGCCRGQGGSMHMFSKEHNVLGGFAFIGEGIPVATGAAFTSKYRREVMKEADCDHVTMAFFGDGTCNNGQFFECLNMAALWKLPIIFVVENNLWAIGMSHLRSTSDPEIWKKGPAFGMPGVHVDGMDVLKVREVAKEAVARARRGDGPTLVECETYRFRGHSLADPDELRDPAEKNHYAARDPISALKKYMFENNLASEAELKAIDKKIDELVEEAVEFADES…	AT1G01090	XP_004251713.1	6	10	0	-	0	0	3	3	5.1.2.2.1.1	'Lipid metabolism.fatty acid metabolism.acetyl-CoA generation.plastidial pyruvate dehydrogenase complex.E1 pyruvate dehydrogenase subcomplex.subunit alpha'	Cp		1	Cp	Cp	Cp	M	67.3	envelope-inner-peripheral-stromal-side	plastid	plastid
	Solyc12g009410	PDH E1-alpha	Pyruvate dehydrogenase E1 component alpha subunit (AHRD V1 **** Q5N030_SYNP6); contains Interpro domain(s) IPR017597 Pyruvate dehydrogenase (acetyl-tRNAansferring) E1 component, alpha subunit, subgroup y	MAASASSFAANNFLQPINSTRSIDNNNKKTLLGNQLKDSSFFLGSAKKLYMKKPFSSQNSKSRSNGVFAVSEVVKNKKPNTDSSLSNLLITKDEGLELYEDMVLGRAFEDMCAQMYYRGKMFGFVHLYNGQEAVSTGFIKLLKKEDSVVSTYRNADHVHALSKGVPARQVMSELFGKTTGCCRGQGGSMHMFSKEHNVLGGFAFIGEGIPVATGAAFTSKYRREVMKEADCNADHVTMAFFGDGTCNNGQFFECLNMAALWKLPIIFVVENNLWAIGMSHLRSTSDPEIWKKGPAFGMPGVHVDGMDVLKVREVAKEAVARARRGDGPTLVECETYRFRGHSLADPDELRDPAEKNHYAARDPISALKKYMFENNLASEAELKAIDKKIDELVEEAVEF…	At1g01090	XP_004251714.1	10	28	1	2.325	0.0149928	5	0	5	8.1.1.1	TCA / org transformation.TCA.pyruvate NADH.E1	Cp	70	1	Cp	Cp	Cp	M	60.5	envelope-inner-peripheral-stromal-side	plastid	plastid
	Solyc08g016750	PDH E1-beta	Pyruvate dehydrogenase E1 component subunit beta (AHRD V1 ***- B6TQ36_MAIZE); contains Interpro domain(s) IPR005475 Transketolase, central region	MAAIIQGIGAATALTSANSLDTKKSLFANSRRSLSERKGRLFVARSDGRLSSGLNGRGGRAEQLITNAVAAKEDAAAASTSFKPGHELLLFEALREGLEEEMDRDPTVCVMGEDVGHYGGSYKVTKGLAPKYGDLRVLDTPIAENSFTGMGIGAAMTGLRPVIEGMNMGFLLLAFNQISNNCGMLHYTSGGQFKIPVVIRGPGGVGRQLGAEHSQRLESYFQSIPGIQMVACSTPYNAKGLMKAAIKSDNPVILFEHVLLYNLKERIPDEEYVLNLEEAEMVRPGEHVTILTYSRMRYHVMQAAKTLVNKGYDPEVIDIRSLKPFDLYTIGKSVKKTHRVLIVEECMRTGGIGASLTAAITENFHDYLDAPIVCLSSQDVPTPYAGTLENWTVVQPPQI…	At2g34590	XP_004244808.1	4	6	1	1.31	0.00844756	1	3	4	8.1.1.1	TCA / org transformation.TCA.pyruvate NADH.E1	Cp	27	1	Cp	Cp	Cp	M	92.7	plastid	plastid	plastid
	Solyc04g008590	PDH E1-beta	Pyruvate dehydrogenase E1 component subunit beta (AHRD V1 ***- B6TQ36_MAIZE); contains Interpro domain(s) IPR005475 Transketolase, central region	MAAIIQGIGAATALTSASSLDTKKTFFSNSRRSLSERKGRTFVVRSDGGLSYGLNGRGGRAEQLITNAVATKEDTAAASTSSKPGHELLLFEALREGLEEEMDRDPAVCVMGEDVGHYGGSYKVTKGLAPKYGDLRVLDTPIAENSFTGMGIGAAMTGLRPVIEGMNMGFLLLAFNQISNNCGMLHYTSGGQFKIPVVIRGPGGVGRQLGAEHSQRLESYFQSIPGIQMVACSTPYNAKGLMKAAIRSDNPVILFEHVLLYNLKERIPDEEYVLNLEEAEMVRPGEHVTILTYSRMRYHVMQAAKTLVNKGYDPEVIDIRSLKPFDLHTIGNSVKKTHRVLIVEECMRTGGIGASLTAAITENFHDYLDAPIICLSSQDVPTPYAGTLENWTVVQPPQI…	At2g34590	XP_010319368.1	4	12	1	2.162	0.0139417	4	1	5	8.1.1.1	TCA / org transformation.TCA.pyruvate NADH.E1	Cp	45	1	Cp	Cp	Cp	M	69.3	plastid	plastid	plastid
	Solyc11g017250	PDH-E2	Dihydrolipoyllysine-residue acetyltransferase component of pyruvate dehydrogenase complex (AHRD V1 ***- A5GUY8_SYNR3); contains Interpro domain(s) IPR001078 2-oxoacid dehydrogenase acyltransferase, catalytic domain	MSHLLQSTFIPTTPTTLRRRSVFPTTHLRKTHVVESKIREIFMPALSSTMTEGKIISWMKTEGDKLAKGESVVVVESDKADMDVESFYDGYLASIIVPEGSSAPVGSPIALLAESEDEISLAKSKTPTSTSTSSPAATASVTEEVSTVAAAVAVPVTATSSSDAAPVKMASSIHPASEGGKRVVASPYAKKLAKELGLDLRGVVGSGPNGRIVAKDVEAAAGSAPIGVAAAAKPSGGAPAAPAVELGTTVPFTTMQSAVSRNMVESLAVPTFRVGYTITTNALDALYKKVKSKGVTMTALLAKATALALVQHPVVNSSCRDGKSFTYNSSINIAVAVAIDGGLITPVLQDADKVDLYSLSRKWKELVDKARAKQLQPHEYTTGTFTLSNLGMFGVDRFD…	At1g34430	XP_004250376.1	5	7	3	1.154	0.00744159	2	0	2	8.1.1.2	TCA / org transformation.TCA.pyruvate NADH.E2	Cp	34	4	Cp	Cp	Cp	M	100	envelope-inner-peripheral-stromal-side	plastid	plastid
	Solyc05g009530	PDH-E2	Dihydrolipoyllysine-residue acetyltransferase component of pyruvate dehydrogenase complex (E2 subunit) (AHRD V1 **** A5GUY8_SYNR3); contains Interpro domain(s) IPR001078 2-oxoacid dehydrogenase acyltransferase, catalytic domain	MASLQSSAISFSSSLGRFSSTRTMLPQKPRKYKLPVVESKIREIFMPALSSTMTEGKIVSWVKSEGDVLSKGESVVVVESDKADMDVETFYDGILAVIVVNEGETALVGAPIGLLAETEDEIAEAKAKAKGQSGGSSSGSESTPEPQSPVVVSSDEPKKIVATPNAKKLAKQHKIDINKVKGTGPFGRITSEDVEKAAGITPAPSKSISPPPPPPAAAPAAGAPAKAAPVSLPEIPGSTVVPFTTMQVAVSKNMVESLSVPTFRVGYPVITDALDALYLKVKKKGVTMTALLAKAAAMALAQHPVVNSSCKDGKSFTYNSSINIAVAVAINGGLITPVLQDADKLDLYLLSQKWKELVEKARAKQLQPHEYNSGTFTLSNLGMFGVDRFDAILPPGQGA…	At3g25860	XP_004238940.1	9	17	7	2.162	0.0139417	5	1	6	11.1.31	lipid metabolism.FA synthesis and FA elongation.pyruvate NADH	Cp	37	2	Cp	Cp	Cp	Cp	81.7	plastid	plastid	plastid
	Solyc05g053100	PDH-E3	Dihydrolipoyl dehydrogenase (AHRD V1 ***- B9RZN2_RICCO); contains Interpro domain(s) IPR006258 Dihydrolipoamide dehydrogenase	MYFSSVLSPSNCSLVKRSHQNQLEKLSFTPLKNLRFCGLRNEILAFEFLKLNRCETQRVCNFRRSKIVVSASVAENGSAPTSFDYDLVIIGAGVGGHGAALHAVEKGLKTAIIEGDVignaGTCVNRGCVPSKALLAVSGRMRELKNEHHLKALGIQVSGAGYDRQAVANADHANNLASKIRNNLTNSLKALGVDILTGVGTITGPQRVKYGKVGFSGSEVTARDIIIATGSVPFVPRGIEVDGKTVITSNADHALKLEFVPEWIAIVGSGYIGLEFSDVYTALGSEVTFIEALDQLMPGFDPEISKLAQRILVNPRKIDYHTGVFATKITPAKDGRPVVIELTDAKTKEVKDTLEVDAALIATGRAPFTNGLGLENINVLTQRGFIPVDERMRVVDAD…	At3g16950	XP_004239903.1	14	58	10	4.248	0.0273933	5	3	8	8.1.1.3	TCA / org transformation.TCA.pyruvate NADH.E3	Cp	53	2	Cp	Cp	Cp	M	99	plastid	plastid	plastid
	Solyc01g100360	PDH-E3	Dihydrolipoyl dehydrogenase (AHRD V1 ***- B5LAW5_CAPAN); contains Interpro domain(s) IPR006258 Dihydrolipoamide dehydrogenase	MQSSISLSLSSPSTICRSDSSAAVSNVNVNLLNPRSLRFCGLRREAFGLNSSLSTHRIQSLSNATRRPCSNRIVASSAGNGAASKGFDYDLVIIGAGVGGHGAALHAVEKGLKTAIIEGDVVGGTCVNRGCVPSKALLAVSGRMRELQNEHHMKSFGLQVAAAGYDRQGVANADHANNLASKIRSNLTNSMKSLGVDILTGFGTVLGPQKVKYGDTVITAKDIIIATGSVPLVPKGIEVDGKTVITSNADHALKLEFVPQWIAIVGSGYIGLEFSDVYTALGSEVTFVEALDQLMPGFDPEIGKLAQRVLINPRKIDYHTGVFASKITPAKDGKPVTIELIDAKTKELKDTLEVDAALIATGRAPFTQGLGLENINVQTQRGFVPVDSRMRVIDASGEL…	At4g16155	XP_004230295.1	12	31	8	2.03	0.0130905	5	1	6	8.1.1.3	TCA / org transformation.TCA.pyruvate NADH.E3	Cp	74	1	Cp	Cp	Cp	M	96.3	plastid	plastid	plastid
Fatty acid & lipid biosynthesis	Solyc01g006980	MCAT	Malonyl CoA-acyl carrier protein transacylase containing protein expressed (AHRD V1 ***- Q10MS3_ORYSJ); contains Interpro domain(s) IPR004410 Malonyl CoA-acyl carrier protein transacylase	MSCSSSLILPSISSNGFRRFSPLKLDKSRVFMSSISVGSQIAAVDDALFADYKPTNAFLFPGQGAQAVGMGAEAQKVPAAAELYKRANEIMGFDLLDICINGPKEKLDSTVLSQPAIYVTSLAAVEILRAREGGQQIIDSVDVTCGLSLGEYTALAFTGAFSFEDGLKLVKLRGEAMQDAADAAKSAMVSIIGLDSDKVQKLCDAANEEVDEANKVQIANFLCPGNYAVSGGVKGIEAVEAKAKSFKARMTVRLAVAGAFHTSFMNPAVSRLEAALSATEIRTPRIPVISNVDAQPHADPDTIKKILASQVTSPVQWETTIKTLLTKGLKKSYELGPGKVIAGIVKRMDRGAEIENIGA	At2g30200	XP_004228628.1	9	116	9	18.307	0.118053	5	3	8	11.1.2	lipid metabolism.FA synthesis and FA elongation.Acetyl CoA Transacylase	Cp	49	2	Cp	Cp	Cp	Cp	90.5	plastid stroma	plastid	plastid
	544163622	AccD	acetyl-CoA carboxylase carboxyltransferase beta subunit (chloroplast) [Solanum lycopersicum]	MTIHLLYFHANRGQENSMERWWFNSMLFKKEFErRNACGLNKSMGSLGPIENTSEDPNLKVKNIHSCSNVDYLFGVKDIWNFISNDTFLVSDRNGDSYSIYFDIENHIFEVDNNADHSFLSELESSFYSYRNSSYLNNGFRGEDPYYNSYMSYMYDTQYSWNNHINSCIDNYLQSQICIDTSIISGSESNGDSYIYRAICSGQSLNSSENEGSSrRNATRTKDSDLTIRESSNDLEVTQKYKHLWVQCENCYGLNYKKFLKSKMNICEQCGYHLKMSSSDRIELLIDPGTWDPMDEDMVSLDPIEFHSEEEPYKDRIDSYQRKTGLTEAVQTGIGQLNGIPVAIGVMDFQFMGGSMGSVVGEKITRLIEHAANQNLPLMIVCASGGARMQEGSLSLMQM…	Atcg00500	-	11	33	11	3.642	0.0234855	5	2	7	11.1.1.2.2	lipid metabolism.FA synthesis and FA elongation.Acetyl CoA Carboxylation.heteromeric Complex.beta Carboxyltransferase	-	-	-	-	-	-	-	-	plastid stroma	plastid	-
	Solyc06g050590	BLP3	Biotin carboxyl carrier protein of acetyl-CoA carboxylase(AHRD V1 *-*- D3PS72_MEIRD); contains Interpro domain(s) IPR011053 Single hybrid motif; BIOTIN/LIPOYL ATTACHMENT DOMAIN CONTAINING 3, BLP3	MESAAVLRSFHHSVGTTSHVRSVIEMPGVIPTNNIAFSKPTKFSLKGSSNGARRISSPNKHGRLILSCAKTSETTVTAKSGDGNHKVPTESSPLPTATFPKGFEALITEVCDDTEVAELKLKVGDFELHLKRNIEAPVVPAPVVSAPPPPPPPPSASKPSISSTAAPAASPGKSTSGKISPFTNVAAEKSAKLAALESTGASGYVLVSCPTVGSFRRARTLKGKKQPPACKEGDIIKEGQIIGFLDQFGTELPVRSDAAGEVLKILFNDGEAVGYGDPLIAVLPSFHGIN	At3g56130	XP_004240889.1	4	14	4	1.424	0.00918269	5	3	8	11.1.1	lipid metabolism.FA synthesis and FA elongation.Acetyl CoA Carboxylation	Cp	67	3	Cp	possibly Cp	Cp	Cp	89.7	plastid	plastid	-
	Solyc06g068010	BLP2	Biotin carboxyl carrier protein of acetyl-CoA carboxylase (AHRD V1 *-*- C6NTC5_9GAMM); contains Interpro domain(s) IPR011053 Single hybrid motif; BIOTIN/LIPOYL ATTACHMENT DOMAIN CONTAINING protein 2	MAACGFGASGLKLTSLNLGSTKPKLSVVHNLRTKKFVQSDGLLLTTKSRKTFDCRCSTVEAESVAATAIPNSDDSSSKIVSSETASPLTPNSYEVESLLTEICDTTSIAEVDLKLGGFRLYVKRDLTGQSTTSLPPISSPVSVSSSVEVADSNGSASSTSLAITKSSPPSDGIQTMIEKAADEGLVIIQSPRVGFFrRNASRTIKGKRAPPACKEKQQVKEGQVVFYIEQLGGELPVESDVSGEVIRILRKDGDPVGYGDPLISILPSFPGIKKLQ	At1g52670	XP_004241703.1	2	9	2	1.683	0.0108529	5	3	8	11.1.1.2.3	lipid metabolism.FA synthesis and FA elongation.Acetyl CoA Carboxylation.heteromeric Complex.Biotin Carboxyl carrier Protein	Cp	55	2	Cp	Cp	Cp	Cp	91.6	plastid	plastid	-
	Solyc01g094340	CAC3	Acetyl-coenzyme A carboxylase carboxyl transferase subunit alpha (AHRD V1 *-*- A0YRC5_LYNSP); contains Interpro domain(s) IPR001095 Acetyl-CoA carboxylase, alpha subunit	MSSLSLAVGNCGKGRNAENLSSEFVPHSSLGSEFLTKRLYGLNLKDLGSPKVRTRKKFRIAAEIKKWKKQDYPWHGDIDPDTKTPLKYLSYFKPLDEKLKPVTLAFEKPLVNLEKQLIEVRRMAEDTGLDFTDQIYALEAKYQQALRDLYTHLTPIQRLQIARHPNRPTVLNADHILNMTEKWVELHGDRAGYDDPAMVTGIGSIEGRSYLFIGHQKGRNTKENIMRNFAMPTPHGYRKALRMMKYANADHHGFPIVTFVDTPGAFADLRSEELGQGEAIAYNLRAMFGLKVPIITVVTGEGGSGGALAIGCANKLLMLENSAFYVASPEACAAILWKSSQAAPKAAEKLRITAQEHYRLRIADGIIPEPLGGAHADPFWASQQIKHAILDAMAELGRM…	At2g38040	XP_004229885.1	10	19	9	0.753	0.00485573	5	0	5	11.1.1.2.1	lipid metabolism.FA synthesis and FA elongation.Acetyl CoA Carboxylation.heteromeric Complex.alpha Carboxyltransferase	Cp	27	4	-	-	not Cp	C	72	envelope-inner-peripheral-stromal-side	plastid	plastid
	Solyc09g013080	CAC3	Acetyl-coenzyme A carboxylase carboxyl transferase subunit alpha (AHRD V1 *-*- B7KJL9_CYAP7); contains Interpro domain(s) IPR001095 Acetyl-CoA carboxylase, alpha subunit	MASTSHPPVAFSGSLASKTSASDLLRSSRNGVCGVPLKTLgranaQLGSKKRDFTISAKVRKVKKHEYPWPEDPDLNVKGGVLSHLSPFKPLKEKPKPVTLDFEKPLMDLQKKIIDVQKMANETGLDFSDQIISLENKYQQALKDLYTHLTPIQRVNIARHPNRPTFLNADHIFNITEKFVELHGDRAGYDDPAIVTGLGTINGRSYMFMGHQKGRNTKENIQRNFGMPTPHGYRKALRMMYYANADHHGFPIITFIDTPGAYADLKSEELGQGEAIAHNLRSMFGLKVPIISIVMGEGGSGGALAIGCANKLLMLENAVFYVASPEACAAILWKTAKASPKAAEKLKITAQELCRLQIADGSIPEPLGGAHADPYWTSQQIKIAIEESMDELTKMDTQ…	At2g38040	XP_004246350.1	14	38	13	2.511	0.0161922	5	1	6	11.1.1.2.1	lipid metabolism.FA synthesis and FA elongation.Acetyl CoA Carboxylation.heteromeric Complex.alpha Carboxyltransferase	Cp	55	1	Cp	Cp	Cp	Cp	98.3	envelope-inner-peripheral-stromal-side	plastid	plastid
	Solyc05g056290	CAC1	Acetyl-CoA carboxylase biotin carboxyl carrier protein (AHRD V1 *-** B9Z6D8_9NEIS); contains Interpro domain(s) IPR000089 Biotin/lipoyl attachment IPR001882 Biotin-binding site	MTTSFGTTATPAASASPAVFPAKNAPKSLTLLPFCHHRHYNHLRSKLSITPKLRFSCKGLQSNWNHSVVTRAQSNEVALGGSSNNAATPITQSEEVKSPSETSSATSVSEEAISNFISQVSSLVKLVDSRDVVELQLKQFDCEILIRKKEALPQPPAPVPAQAPFIQSYHVPSIQSNASPPPAPAPSPAPIQTPAPSPAAAKSADSSLPPLKSPMAGTFYRSPAPGEPAFVKVGDKVQKGQVLCIIEAMKLMNEIEADRSGTIVEVVAEDGKPVSVDTPLFVIKP	At5g16390	NP_001234322.1	4	12	4	1.31	0.00844756	5	3	8	11.1.1.2.3	lipid metabolism.FA synthesis and FA elongation.Acetyl CoA Carboxylation.heteromeric Complex.Biotin Carboxyl carrier Protein	Cp	11	2	Cp	Cp	Cp	Cp	99.7	plastid stroma envelope-inner-peripheral-stromal-side	plastid	-
	Solyc06g069530	CAC1	Acetyl-CoA carboxylase biotin carboxyl carrier protein (AHRD V1 *-** Q7NZD6_CHRVO); contains Interpro domain(s) IPR001249 Acetyl-CoA biotin carboxyl carrier	MASFSVPCPKISVLSVASSSNLSSTHQPQSSLSFRSGPALLPRIQGSSRIQSQVFKVNAQLNEVAIDKSNNSKPVSEKSLEEVSKTEYSIPDASSIQAFMSQAADLVELVDSRDIVELQLKQNNCEILIRKKAALPQPPVYMASPSVPQAFVQQQLPPASAPAPAAPAVAALPPPAPSKPKSSHPPMKCPMAGTFYRSPAPGAAPFVKVGDKVQKGQVVCIIEAMKLMNEIEADQAGTIVDIVAEDGKPVSVDTPLFVIEP	At5g16390	XP_004241599.1	2	7	2	0.425	0.00274062	5	1	6	11.1.1.2.3	lipid metabolism.FA synthesis and FA elongation.Acetyl CoA Carboxylation.heteromeric Complex.Biotin Carboxyl carrier Protein	Cp	58	1	Cp	Cp	Cp	Cp	100	plastid stroma envelope-inner-peripheral-stromal-side	plastid	-
	Solyc01g008330	CAC2	Acetyl-CoA carboxylase biotin carboxylase (AHRD V1 ***- B4VQU4_9CYAN); contains Interpro domain(s) IPR004549 Acetyl-CoA carboxylase, biotin carboxylase	MDSAAMTSVCGKSALCSTPGLFLGRTNGIRSSQCSFIAGNRINFPRQTAQAHRVRTNSRKGHGALTVTCRAEKILVANRGEIAVRVIRTAHEMGIPCVAVYSTIDKDALHVKLADESVCIGEAPSNQSYLVIPNVLSAAISRGCTMLHPGYGFLSENASFVEMCREHGINFIGPNPDSIRVMGDKATARDTMKNAGVPTVPGSDGLLQSTEEGVKLAEEIGYPVMIKATAGGGGRGMRLAKEPNEFVKLLQQAKSEAAAAFGNDGVYLEKYIVNPRHIEFQVLADKYGNVVHFGERDCSIQRRNQKLLEEAPSPALTPELRKAMGDAAVAAAASIGYIGVGTIEFLLDERGSFYFMEMNTRIQVEHPVTEMISSVDLIEEQIRVAMGEKLRYKQEDIVL…	At5g35360	XP_004228525.1	20	104	20	6.055	0.0390458	5	3	8	11.1.1.2.4	lipid metabolism.FA synthesis and FA elongation.Acetyl CoA Carboxylation.heteromeric Complex.Biotin Carboxylase	Cp	55	2	Cp	-	Cp	Cp	52.2	envelope-inner-peripheral-stromal-side	plastid	plastid
	Solyc03g118410	ACP4	Acyl carrier protein (AHRD V1 ***- Q672Q9_SOLLC); contains Interpro domain(s) IPR003231 Acyl carrier protein (ACP)	MASLSATCLRFGCSVNTSQINGGTVKLVSVGWGRSSAGFPSLRTSRLRVAAAKAETIDKVISIVRKQLALPADTKVSPESTFTKDLGADSLDTVEIVMALEEEFGIAVEEENSENIVTVQDAADLIEKLVEKK	At4g25050	NP_001234522.1	4	44	4	6.499	0.0419089	5	3	8	11.1.12	lipid metabolism.FA synthesis and FA elongation.ACP protein	Cp	48	1	Cp	Cp	Cp	M	73.8	plastid stroma	plastid	plastid
	Solyc01g067730	ACP5	Acyl carrier protein (AHRD V1 ***- Q9XF20_CAPCH); contains Interpro domain(s) IPR003231 Acyl carrier protein (ACP)	MASVTGSSFAISSLSSSFNPNKACLKTSSLSIKGISFPSLRVKPATrRNAFSISCAAKPETVDKVCEIVKKQLALPSDSAVNGESKFIALGADSLDTVEIVMGLEEAFGITVEEENAQTIATVQDAADLIEDLVAKKC	At5g27200	XP_004229194.1	2	8	2	2.162	0.0139417	5	3	8	11.1.12	lipid metabolism.FA synthesis and FA elongation.ACP protein	Cp	52	1	Cp	Cp	Cp	Cp	100	-	plastid	-
	Solyc03g097470	KAS3	3-ketoacyl-(Acyl-carrier-protein) synthase III (AHRD V1 ***- D5A3B9_SPIPL); contains Interpro domain(s) IPR004655 Beta-oxoacyl-acyl carrier protein synthase III (FabH)	MANTTIAAGPTFSLQHRHQVFGRVGVSTLRHQQGHTLFFTQAVPAIrRNAKFCPSIGIYQDRQSFSDGTFNSVMCSSSVEGADKVSTDQSRVLRLGNRGCKLIGCGSAVPSLNVSNDDLAKIVDTNDQWISVRTGIRNrRNAVLSGKDSLTDLAAEAARKALEMAEVDPDDVDLILLCSSTPEDLFGSAPQVQRALGCKSNPLSFDITAACSGFMLGLVSAACYIRGGGFKNVLVignaADALSRYVDWTDRGTCILFGDAAGAVVVQACDIGEDGLFGFDLHSDGGGQRHLNALIKDNETNADHAFGTNGSVignaFPPSNSSYSCIQMNGKEVFRFAVRVVPQSIEAALENAGLPRSKIDWLLLHQANQRILDAVATRLEVPPEHVISNLANYGNTS…	At1g62640	XP_004235286.1	8	40	8	5.31	0.0342416	5	3	8	11.1.3	lipid metabolism.FA synthesis and FA elongation.ketoacyl ACP synthase	M	57	5	Cp	Cp	Cp	Cp	100	plastid stroma	plastid	-
	Solyc08g082620	KAS1	3-ketoacyl-acyl carrier protein synthase 1; 3-ketoacyl-(Acyl carrier protein) synthase I IPR017568 3-oxoacyl-(acyl-carrier-protein) synthase 1	MSSITYSNLILKRRESRINGGSHLQYNGLRAIETVKLTANSASCKPKAVKCGRIRAMASPAVSAPKRETDPKKRVVITGMGLVSVFGSDIDNFYNKLLEGQSGISLIDSFDASSYPVRFAGQIRDFSSEGYIDGKNDRRLDNCWRYCLVAGKRALDDANLGQQVLETMDKTRIGVLVGSGMGGLNVFSDGVEALLQRGYKKVSPFFIPYSITNMGSALLAIETGLMGPNYSISTACASANHSFCAAANHIRRGDADIMVTGGTEAGVTATGVGGFIACRALSQRNDDYEKASRPWDTNRDGFVVGEGSGILVMESLEHALKRGASIIAEYLGGAATCDAHHMTDPRPDGLGVWSCITKGLLDARISPEEVNYIHATSTLAGDLAEVIKKVFKDTSEIKM…	At5g46290	XP_004245499.1	1	3	1	0.166	0.00107045	3	0	3	11.1.3	lipid metabolism.FA synthesis and FA elongation.ketoacyl ACP synthase	M	119	3	-	-	Cp	Cp	69.9	plastid stroma	plastid	plastid
	Solyc02g070790	KAS1	3-ketoacyl-(Acyl-carrier-protein) synthase 2 (AHRD V1 **** D0ZZB8_CHLPP); contains Interpro domain(s) IPR017568 3-oxoacyl-[acyl-carrier-protein] synthase 2	MEAIQSLSFRPSPLEPLRKNIPQFTNVRSLGAKRVPLTVTASASTVSAPKREKDPKKRVVITGTGLVSVFGNDADTYYDRLLAGESGISLIDRFDASKFPTRFGGQIRGFTSEGYIDGKNDrRNALDDCLRYAIVAGKKALENADLGGDRLEKIDKERAGVLVGTGMGGLTVFSDGVQNLIEKGHRKITPFFVPYAITNMGSALLGIDLGFMGPNYSISTACATSNYCFYAAANHIrRNAGEADLMLAGGTEAAIIPIGLGGFVACRALSQRNDDPQTASRPWDKERDGFVMGEGAGILVMESLEHAMKRGAPIIAEYLGGAVNCDAYHMTDPRADGLGVSSCILSSLEDAGVSPEEVNYINAHATSTIVGDLAEINAVKKVFKTTTGIKMNATKSMIG…	At5g46290	XP_004233105.1	9	42	8	9	0.0580367	5	3	8	11.1.3	lipid metabolism.FA synthesis and FA elongation.ketoacyl ACP synthase	Cp	42	2	Cp	Cp	Cp	Cp	91.7	plastid stroma	plastid	plastid
	Solyc08g016170	KAS1	3-ketoacyl-(Acyl carrier protein) synthase II (AHRD V1 **** D6YNQ6_CHLT1); contains Interpro domain(s) IPR017568 3-oxoacyl-[acyl-carrier-protein] synthase 2	MQAIQSSSLRPSPVDPFLKTIPQFTNVKPLKPKRTPFISASSTTVSAPTREKDPKKRVVITGMGLVSVFGNDVDAYYDKLLAGESGVTLIDRFDASKFPTRFGGQIRGFKADGYIDGKNDrRNALDDCLRYCIVAGKKALENADLGSDRDKKIDKERAGVLVGTGMGGLTVFSDGVQALIEKGHRKITPFFIPYAITNMGSALLAIDVGFMGPNYSISTACATSNYCFYAAANHIrRNAGEADLMIAGGTEAAIIPIGLGGFVACRALSQRNDDPQTASRPWDKDRDGFVMGEGAGVLVMESLEHAMKRGAPIIAEYLGGAVNCDAHHMTDPRADGLGVSSCILSSLEDAGVSPEEVNYINAHATSTIVGDLAEVNAIKKVFKNTSEIKMNATKSMIGH…	At5g46290	XP_004244796.1	8	44	7	11.328	0.0730488	5	3	8	11.1.3	lipid metabolism.FA synthesis and FA elongation.ketoacyl ACP synthase	Cp	39	2	Cp	Cp	Cp	Cp	99.8	plastid stroma	plastid	plastid
	Solyc03g122120	KAS2	3-ketoacyl-(Acyl-carrier-protein) synthase 2 (AHRD V1 **** D0ZZB8_CHLPP); contains Interpro domain(s) IPR000794 Beta-oxoacyl synthase	MVASSLASPLCTWLVAACMSVSSEKDQFSKPASSFQSSKFMGrRNARKAITKFKSGSLMNGSVMNTSWHNCFGFEPCEEYYKSDGFSASFSSLFAENPFSVFGFKQVPLNrRNAQrRNAMSSAAHPGKPMAVAVQPAMEATTMKKPLMRNrRNAVVVTGVGVVSPIGHDPDMFYSNLLEGISGISQIEAFDCSEFPSRIAGEIKEFSTNGWVAPKLSKRADKFMLYMLTAGKKALADGGITEDLLQELDKARCGVLIGSALGGMKVFHDGIEALQVSYKKLNPFCVPFATSNMGAAMLAIDLGWMGPSYSISTACATSNFCILSASNHIIRGETDMMLCGGSDSAIIPIGLGGFSACGALSQRNSDPTRASRPWDMDRDGFVignaEGSGVLLLEELEH…	At1g74960	XP_004235286.1	1	4	1	0.212	0.00136709	4	0	4	11.1.3	lipid metabolism.FA synthesis and FA elongation.ketoacyl ACP synthase	Cp	17	2	Cp	Cp	Cp	Cp	100	plastid	plastid	-
	Solyc06g084260	FAB1	Fatty-acid-binding protein 1	MASLRFPFLFPQPHKTPSSATSDAPSRSFSTVAVAVASGGSALAAAGAIIAITQSPKNPFLENAMNFLLSNFSPNKNHSSPLWGSVSLADNSAPVTESRTGMAFPSILKDTQRLLGIGLRKKAVFGLKNIDVYAYGVYADDVDVKRYLAEKHGRRSVSELQQKEELRNHLMENNIRMTIRLQIVYGRLSINSVRSAFEESVGSRLHKFGGCDNKELLQRFTSQFKDEIKLPRGSIIELSRNADHDYILHTTIDGKEVGSIQSKLLCRSILDLYIGDESFNADHKANEDVESNLASLLHK	At3g63170	XP_004242334.1	5	12	5	1.448	0.00933745	4	3	7	35.2	not assigned.unknown	Cp	32	5	Cp	Cp	Cp	Cp	68.6	plastid stroma	plastid	plastid
	Solyc06g071910	KR	3-ketoacyl-reductase (AHRD V1 ***- B6THT6_MAIZE); contains Interpro domain(s) IPR011284 3-oxoacyl-(acyl-carrier-protein) reductase; 3-oxoacyl-acyl carrier protein reductase (KR)	MATLTFNSVAATSKIRSSVAAANSSVrRNAQLSHVRLPSSPIQPSSVLQCRWSSSASSGVRAQVTTTEQVGVKAAAKVEAPVVIVTGASRGIGKAIALALGKAGCKVLVNYARSSKEAEEVSKEIEACGGEALAFGGDVSKEEDVESMMKTVVDRWGTVDILINNAGITRDTLLMRMKKSQWQEVIDLNLTGVFLSTQAAAKIMMKKKKGRIINISSVVGLVGNAGQANYSAAKAGVignaLTKSVAKEYASRNITVNAIAPGFIASDMTAQLSEDIEKKLLQSIPLGRYGQPEDVAGLVEFLALSPAASYITGQVLTIDGGMVM	At1g24360	XP_004241501.1	6	28	6	2.162	0.0139417	5	3	8	11.1.4	lipid metabolism.FA synthesis and FA elongation.ACP oxoacyl reductase	Cp	71	1	Cp	Cp	Cp	Cp	100	plastid stroma	plastid	plastid
	Solyc01g105060	-	Uncharacterized protein in the thioesterase superfamily protein; TomCYC 2-hyrdoxyl-{acp} dehydratase; 3-hydroxyacyl-[acyl-carrier-protein] dehydratase [EC:4.2.1.59]	MASMALSQSVFSTPTSQRFENASFPLPSSMVKQSLVTFRSHSLSTHCKKIRNSVITNCAAPDNDSKIETPIELRYPAFPTVMDINQIREVLPHRFPFLLVDRVIEYNPGVSAVAIKNVTINDNFFPGHFPERPIMPGVLMVEAMAQVGGLVMLQPEVGGSKQNFFFAGIDKVRFRKPVIAGDTLVMRMTLIKLQKRFGIAKMEGKAYVGGDVVCEGEFLMATGSE	At5g10160	XP_004230623.1	9	78	9	16.783	0.108225	5	3	8	11.1.5	lipid metabolism.FA synthesis and FA elongation.beta hydroxyacyl ACP dehydratase	Cp	57	1	Cp	Cp	Cp	Cp	97	plastid stroma	plastid	-
	Solyc01g006450	ENR1	Enoyl reductase (AHRD V1 ***- P93062_BRA); contains Interpro domain(s) IPR014358 Enoyl-[acyl-carrier-protein] reductase (NADH)	MAASAASSFQITIARPSIFSTKRITSFCSTKFGGETQKLSCNRLASSCHVSSIQHFWRSFTSTTQKFQKVVTKAKSEADDSKPASVLPIDLRGKRAFIAGIADDNGYGWAIAKSLAAAGAEILVGTWVPALNIFETSLrRNAGKFDESRVLPDGSLMEITKVYPLDAVFDSLEDVPEDIKTNKRYAGSSKWTVSEVAESVKEDFGSIDILVHSLANGPEVTKPLLETSrRNAGYLAAISASSYSYVSLLKHFLPIMNPGGSSISLTYIASERIIPGYGGGMSSAKAALESDTRVLAFEAGRKQKVRVNTISAGPLRSRAAKAIGFIDMMIDYSIANAPLQRELSADEVGNTAAFLASPLASAITGAVIYVDNGLNAMGVGVDSPIFKDLNIPKSTE	At2g05990	XP_010315949.1	8	53	4	3.642	0.0234855	5	3	8	11.1.6	lipid metabolism.FA synthesis and FA elongation.enoyl ACP reductase	Cp	71	1	Cp	Cp	Cp	Cp	100	plastid stroma	plastid	plastid
	Solyc10g078740	ENR2	Enoyl reductase (AHRD V1 ***- P93062_BRA); contains Interpro domain(s) IPR014358 Enoyl-[acyl-carrier-protein] reductase (NADH)	MAANTTPGLQIQATKQCIPASQNVSKMSTMSFNFGSKRKSFTDFRSSSHISLAKPIHSFKLAPIKFERMVTKAMSGASEQVPVSGLPIDLRGKRAFIAGIADDNGYGWAIAKSLAAAGAEILVGTWVPALNIFETSLrRNAGKFDQSRVLPDGSLMEIAKVYPLDAVFDSPEDVPEDVKTNKRYAGSSKWTVSEVAESVKQDFGTIDILVHSLANGPEVSKPLSETSRKGYLAAISASSYSFISLLKHFLPIMNPGGATISLTYIASERIIPGYGGGMSSAKAALESDTKVLAFEAGRKHKVRVNTISAGPLGSRAAKAIGFIDMMINYSLENAPLQKELYAEEVGNTAAFLASPLASAITGATVYVDNGLNAMGVGVDSPAFTGLDIPKDNKS	At2g05990	XP_004249169.1	7	48	3	2.981	0.019223	4	2	6	11.1.6	lipid metabolism.FA synthesis and FA elongation.enoyl ACP reductase	Cp	72	2	Cp	Cp	Cp	Cp	100	plastid stroma	plastid	plastid
	Solyc03g063110	-	Stearoyl-[acyl-carrier-protein] 9-desaturase, chloroplastic	MALNFNPPTFQSIQTTrRNAPCSPLRSHRVLMASTLRPPSVEGGNVKKPFSPPREVHVQVTHSMPPEKREIFDSLQGWAENNILVHLKPVEKCWQASDFLPDPASEGFEDQVKELRERCKEIPDDYFVVLVGDMITEEALPTYQTMINTLDSVRDETGASLTPWAIWTRAWTAEENRHGDLLNKYLYLSGRVDMRQIEKTIQYLIGSGMDPRTENNPYLGFIYTSFQERATFISHGNTARHAKEHGDMKLAQVCGIIAADEKRHETAYTKIVEKLFEVDPDGTVMAVADMMRKKISMPAHLMYDGRDDNLFEHFSAVAQRLGVYTAKDYADILEFLVGRWEIEKLTGLSGEGHKAQDYVCGLAPRIRKLEERAQARAKQKAPVPFSWVFGKDIKL	At3g02630	XP_004234817.1	4	34	1	0.874	0.00563601	5	3	8	11.1.15	lipid metabolism.FA synthesis and FA elongation.ACP desaturase	Cp	30	2	Cp	Cp	Cp	Cp	100	stroma	plastid	plastid
	Solyc06g053480	FAB2	Stearoyl-acyl carrier protein desaturase (AHRD V1 **** B7TZ44_SPIOL); contains Interpro domain(s) IPR005067 Fatty acid desaturase, type 2	MALKLNAFNFQSHKYSSSFVHPPMLSLRSPKFFMAASLTSGTKEVENLKKPFSPPREVHVQVTHSMPPQKIEIFKSLEGWAEQNLLTLLKPVEKSWQPQDFLPDPASDGFHDQVKELRERAKELPDDYLVVLVGDMITEEALPTYQSMINTLDGVRDETGASPTSWAIWTRAWTAEENRHGDLLNKYLYLSGRVDMRAIEKTIQYLIGSGMDPRTENSPYLGYIYTSFQERATFISHGNTARFAKEHGDIKLAQICGTIAADEKRHETAYTKIVEKLFEIDPDGTVLAFADMMRKKIAMPAHLMYDGRDDNLFNADHFSAVAQRLGVYTASDYADILEFLVGRWKVSDLTGLSGEGRKAQEYLCGLTARIrRNALEERAQVRAKQGPIMPFSWIYDREV…	At2g43710	XP_004241001.1	8	67	6	5.31	0.0342416	5	3	8	11.1.15	lipid metabolism.FA synthesis and FA elongation.ACP desaturase	Cp	34	5	Cp	Cp	Cp	Cp	100	plastid stroma	plastid	-
	Solyc12g006870	-	Acyl-protein thioesterase 2 (AHRD V1 **-- B6T1C9_MAIZE); contains Interpro domain(s) IPR003140 Phospholipase/carboxylesterase	MSFTGASVGSVAGTArRNAAFEFGQTYVVKPKGKHQATIVWLHGLGDNGSSWSNLLETLPLPNIKWICPTAPQRPITLFGGFPSTAWFDVNDLSENAIDDNEGLDASAAYVASLLATEPSHIKLGVGGFSMGAATSLYSATCFVRGKYENGNSYPVNLSAAVGLSGWLPCAKTLTSKLEGVEGAVNRATSLPILLCHGKGDDVVPYNYGEKSSQKLRSCGFQDVAFKSYTALGHYTIPEEMDEVCGWLTSKLGLEGKS	At5g20060	XP_004251587.1	1	1	1	0.389	0.00250847	1	2	3	11.9.3.2	lipid metabolism.lipid degradation.lysophospholipases.carboxylesterase	-	-	5	-	-	Cp	Cp	91	-	-	-
	Solyc06g083380	FATA	Oleoyl-acyl carrier protein thioesterase 2; Acyl-ACP thioesterase (AHRD V1 **** D7RU32_CAPAN); contains Interpro domain(s) IPR002864 Acyl-ACP thioesterase	MLCRGTFQAGNVAIGNADHNECYKRFFNSVSIGCRKSFVSSCSVGARSGPVLAVATNETTKTKQMAYEPSLADRLRLGTMSEDGMSYKEKFIVRCYEVGINKTVTVETIANLLQEVGCNHAQSVGFSTDGFATTHSMRKLHLIWVTARMYIEIYKYPAWSDVVEIETWCQSEGRIGTrRNADWILKDCATGEVignaranaTSKWLMMNQDTrRNALQKVTDEVRDELELYFPKELRLAFPEENNGSLKKIAKLEDPAEYSKLGMVPrRNAADLDMNQHVNNVTYIGWVLESIPQEIIDTHELETITIDYrRNAECQHDDVVDSLTSVEPIEDADALESHGSNGSATAPKDVNKSFLHLLRLSSDGLEINRCRTEWRKKSART	At4g13050	XP_004242408.1	4	14	4	0.668	0.00430761	5	2	7	11.1.7	lipid metabolism.FA synthesis and FA elongation.ACP thioesterase	Cp	41	4	Cp	-	Cp	Cp	99.9	-	plastid	-
	Solyc08g076470	ATS1	Glycerol-3-phosphate acyltransferase (AHRD V1 **** Q7XYH5_CAPAN); contains Interpro domain(s) IPR016222 Glycerol-3-phosphate O-acyltransferase	MLILSAASSSSSSSSSFMLSSASSSSARIPRPLSSFSTCVPVVVTTVSSAATSTLFPISCFGVKSRTVGIRKLRCAVFCASKVRGMAEMIEDAMTVSASESHELPQSRDFLDARTGEDLLSAVRKAVEDEKLPLNVAEGMEELYQNYQNAVLQSGVPKADEAILYNMALVFDRVFVDVKDPFEFSPYHKAIREPFDYYKFGQNYIRQLVDFRSSYVGNMSVFSEMAEKLKQGDNVVLMSNHQSEADPAIIALLIESKLPDIAENIIYVAGDRVITDPLCKPFSMGRNLLCVYSKKHMNDDPELAEMKKRANTRSLKEMALLLRGGSKIIWIAPSGGRDRPDPVTKEWYPAPFDASATDNMrRNALVQHAGVPGHIYPLAILCHDIMPPPAQVEKNIGEK…	At1g32200	XP_010325300.1	16	90	16	14.199	0.0915625	5	3	8	11.3.1	lipid metabolism.Phospholipid synthesis.1-acylglycerol-3-phosphate O-acyltransferase	Cp	79	1	Cp	Cp	Cp	Cp	99.8	plastid stroma	plastid	-
	Solyc06g084260	FAB1	Fatty-acid-binding protein 1	MASLRFPFLFPQPHKTPSSATSDAPSRSFSTVAVAVASGGSALAAAGAIIAITQSPKNPFLENAMNFLLSNFSPNKNHSSPLWGSVSLADNSAPVTESRTGMAFPSILKDTQRLLGIGLRKKAVFGLKNIDVYAYGVYADDVDVKRYLAEKHGRRSVSELQQKEELRNHLMENNIRMTIRLQIVYGRLSINSVRSAFEESVGSRLHKFGGCDNKELLQRFTSQFKDEIKLPRGSIIELSRNADHDYILHTTIDGKEVGSIQSKLLCRSILDLYIGDESFNADHKANEDVESNLASLLHK	At3g63170	XP_004242334.1	5	12	5	1.448	0.00933745	4	3	7	35.2	not assigned.unknown	Cp	32	5	Cp	Cp	Cp	Cp	68.6	plastid stroma	plastid	plastid
	Solyc07g062030	FAP3	Fatty-acid-binding protein 3	MAAAGAISVWISTSTPTKITAFNSIPRICYPLKLSRNGIYPLSTFERNGQYEQNLTIKAAASSSVGSAEYTEEPATKVKFQRSLSLPGCSTSLSLLGTGYREKIFAIIGVKVYAAGLYVNDSVFSSLDAWRGRSAADIQQDPSLFNKIFEADLEKSLLIVLVRDVDGKTFWDALDEAISPRIKSPTADDKSALSTFRGVFQGKPLKKETSIFLTWIDPNKMLVSLSFDGMPSSVDATIESPNVASALFDVFLGGDPVSPTLKASVAKGLEATLK	At1g53520	XP_004244307.1	7	20	7	1.955	0.0126069	5	3	8	16.8.2	secondary metabolism.flavonoids.chalcones	Cp	58	4	Cp	Cp	Cp	Cp	97.5	plastid	plastid	-
	Solyc08g063080	SQD1	UDP-sulfoquinovose synthase (AHRD V1 ***- C0LIR3_SOLLC); contains Interpro domain(s) IPR016040 D(P)-binding domain	MAHLLSTTCSLDVSSSKKLHFKSINQCSTPNPTCFNMGISFSPLKLSLQSKRSAKYVIRASAVSMSQEARTQNDSGSQQTTDGASTRKKVMVignaGDGYCGWATALHLSNKGYEVAIVDNLIRRLFDDQLGLDSLTPISSIHNRIRRWKSLTGKDIQLFVGDICEFEFLAEAFKSFEPDAVVHFGEQRSAPYSMIDRSRAIYTQHNNVignaTLNVLFAIKEFREECHLVKLGTMGEYGTPNIDIEEGYITITHNGRTDTLPYPKQASSFYHLSKVHDSHNIAFTCKAWGIRATDLNQGVVYGVRTDETAIHEDLVNRLDYDGVFGTALNRFCVQAAVGHPLTVYGKGGQTRGYLDIRDTVQCVEIAIANPAKPGEFRVFNQFTEQFSVNELAALVTK…	At4g33030	NP_001234269.1	12	68	12	5.449	0.035138	5	3	8	11.10.3	lipid metabolism.glycolipid synthesis.UDP-sulfoquinovose synthase	Cp	59	2	Cp	Cp	Cp	C	70.9	plastid stroma	plastid	-
Lipases	Solyc09g091050	-	Lipase (AHRD V1 *-*- B6V3M3_9ROSI); contains Interpro domain(s) IPR002921 Lipase, class 3	MATLQTHLQFPICSSPRLFHFKNPNSVSFSKKLFFSRKVNGLFSYSKFGAKDSFFCCSQTSGEILPLSSAQKEKETSERPPFDINLAVILAGFAFEAYTSPPDNVGKLEVDAANCKTIFLSESFVREIYDGQLFIKLKKGLNLPAMDLWGTSDPYVVLQLDSQVVKSKVKWGTKEPMWNEEFALNIKQPPLYDLQIAAWDANLVTPHKRMGNAAVNLEHLCDGDSHKLLVDLDGMGGGGKIEIEIKYKSFEKIEEEKKWWNIPIITEFLRKNGFESALKTILGSETVQARQFVQFAFGQMKLLNDAYNDSNSSSSPVLESDVLPESQQSSNLDDSSMPPASEISNNLKDTKVDGEVKLNRDGSDVTDEHDSPGTKILESFQSDKHFWKNFADTVNQKVV…	At4g13550	XP_004247800.1	4	4	4	0.283	0.00182493	3	0	3	11.9.2.1	lipid metabolism.lipid degradation.lipases.triacylglycerol lipase	Cp	69	2	Cp	Cp	Cp	C	90.2	plastid	plastid	-
	Solyc06g068090	PLD-A1	Phospholipase D IPR011402 Phospholipase D, plant	MAQIQLHGTLHVTIFEVDNLQGEEEGGHFFSKIKQHFEETVGIGKGTPKLYATIDLEKARVGRTRIIENEPKNPRWYESFHIYCAHMASNVIFTIKDDNPFGASLIGRAYVPVEELLEGEEIDKWVEIMDKEMNPTAEGSKIHVKLQFFDVSRDPNWGRGIRSSRYPGVPYTFFAQRPGSRVSLYQDAHVPDNFIPKIPLSGGKYYEPHRCWEDIFDAITKHLIYITGWSVYTEIALVRDSRRQKPGGDIMLGELLKKKASEGVKVLMLVWDDRTSVGLLKKDGLMATHDQETEQYFQGTDVNCVLCPRNPDNGGSFVQDIQISTMFTHHQKIIVVDSALPSGELEKRRILSFVGGIDLCDGRYDTPFHSLFRTLDTAHHDDFHQPNFADGSITKGGPR…	At1g52570	NP_001234102.2 Laxalt et at 2001	3	3	1	0.184	0.00118653	1	0	1	11.9.3.1	lipid metabolism.lipid degradation.lysophospholipases.phospholipase D	-	-	4	-	-	not Cp	C	98.88	-	vacuole	plastid
	Solyc08g066800	PLD-A3	Phospholipase D (AHRD V1 **** Q9FR61_SOLLC); contains Interpro domain(s) IPR011402 Phospholipase D, plant	MAQILLHGTLHVTIFEVDKLRTNFGREIFNKVVQGIEGAIGFNKTASTLYATIDLGKARVGRTRLLDEHKNPRWYESFHIYCAHMASDVVFTVKADNPIGAELIGRAYLPVEQLIVGEVVDEWLEILDTERKPVHGHSKIHVKLQYFDVTREYNWNRGIRVTRFPGVPYTFFSQRQGCKITLYQDSHVPDNFVPKIPLAGGNFYEPQRCWEDIFDAITNAKHLIYITGWSVYTEITLIRDMRRPKPGGDITLGELLKKKANEGVRVLMLVWDDRTSVPVLKEDGLMATHDQETAAYFENSEVHCVLCPRNPDDGRSIIQNIEIGTMFTHHQKIVVVDGELPNGDTERRRIVSYIGGIDLCDGRYDTQFHSLFRTLDTAHHDDFHQPNFTGASIQKGGPR…	At3g15730	NP_001289824.2 Laxalt et at 2001	6	7	5	0.438	0.00282445	1	0	1	11.9.3.1	lipid metabolism.lipid degradation.lysophospholipases.phospholipase D	-	-	4	-	possibly Cp	not Cp	C	96.7	-	cytosol	plastid
	Solyc03g116620	PLD-A4	Phospholipase D (AHRD V1 **** D2E4A5_9ROSI); contains Interpro domain(s) IPR011402 Phospholipase D, plant	MAPILLHGTLHVTIHEVDKLHGKQGRNFFSKIKDSVEEKVGMGKGASRIYATVDLEKARVGRTRVIENEPNNPRWYESFHIYCAHMAKNVIFTVKDNNSIGATLIGRAYLPVNDLLEGEEVDEWIEILDEDENPVEAGSKIHVTLQYFEISRDRNWGRGIGTSKYPGVPYTFFPQRTGCRVSLYHDAHIPDNFIPKIPLSGGKYYEPHRCWEDIFDAISKHMIYITGWSVYTEITLMRDSRREKPGGGDTVGELLKKKAKEGVKVLMLVWDDRTSVRLLKKDGLMATHDEETEEYFKDSDVHCVLCPRDPDDGGSIVKDIQTSTMFTHHQKIVIVDTVMPNGESETRRLMSFVGGLDLCDGRYDTPFHSLFRTLDTAHHDDFHQPNFAEASIDKGGPRE…	At1g52570	XP_004235964.1	2	2	1	0.119	0.000767374	1	0	1	11.9.3.1	lipid metabolism.lipid degradation.lysophospholipases.phospholipase D	-	-	2	-	Cp	Cp	C	90.6	-	vacuole	plastid
	Solyc02g094430	ELT5	Esterase/lipase/thioesterase family protein (TAIR) I; Hydrolase alpha/beta fold family protein (AHRD V1 **-- D7L9I6_ARALY); contains Interpro domain(s) IPR000073 Alpha/beta hydrolase fold-1	MEAISAGTYTAAGVSPLLQSRNSCLRITSARFKIASTAATTGRSTASIGQQPPTVPMSIVDSSELEQTTTLNMKDFMKWSKDMIASGSEGGPPRWFSPLDCAAPLKDSPLLLYLPGIDGVGLGLIKHHKRLGKIFNIWCLHVPVTDRTSFSDLVYLVEATVRSEHHHAPrRNAPIYLLGESFGGCLALAVAARNPHIDLALILANPATRLRESQLENLITLCEVIPEQLHPSMVKLLSVTTGVPARLAVAIPGSGHSLQQAVAELFRGDVAFSSYLSVLADVLPVETLIWRLKILKSAASFVSSRLHAVRSQTLVLSSGKNADHLISSPEESEKLHKMLPNCEIRKFNNSGHALLLEADFNLVTVIMGANFYrRNAGRHLDFVRDFVPPSTSEFDSVYQ…	At5g41130	XP_004231751.1	1	2	1	0.101	0.0006513	2	2	4	11.7	lipid metabolism.unassigned	Cp	74	3	Cp	Cp	Cp	Cp	95.4	plastoglobules	plastid	-
	Solyc02g071710	-	GDSL esterase_lipase At1g29670 IPR001087 Lipase, GDSL	MGSGMKIWFVLLTTIFVINFRPFLVMVKGEPQVPCLFIFGDSLFDNGNNNDLLTTAKANYPPYGIDFPDGPTGRFTNGKNSADFLAELLGFNKFIEPFATVKGVDIVRGVNYASGAAGIRDESGIHLGDRISLNRQLRNHKVTISHMSTLLGNKTLTMDYLSKCIYIVGMGNNDYINNYLMPQFYPSSHLYNPEKFATILMQQYSKQLKTLYHYGARKVAVFGVGSLGCIPAELAMYGTKDTICVDSINSAVQKFADKFKPMIDDFNNNLPSANFIYINLTSIAIGDPAQIGLTNLAEPCCEISSVIAKGQCLKGGGACSDRASHYFWDGFHPTEIPNKVTAIRAYTALLPTDAYPFDISHLAATTLALNKIGQSGAEII	At1g29670	XP_004233007.1	7	21	6	3.394	0.0218863	5	3	8	26.28	misc.GDSL-motif lipase	S	-	1	-	ER	Cp	ER	98.2	-	extracellular	plastid
	Solyc06g064640	ABHD11	Alpha/beta hydrolase (AHRD V1 **-- D7W6X8_9FLAO); contains Interpro domain(s) IPR000073 Alpha/beta hydrolase fold-1	MSAISNFTACRRFQNGAALTKDSPGVGLITNKFLATKISTPFHKVSLVCSKRTFKGSNIRMTMLDDKLSSGKVVVPSEVLAYELVQGAKVKWSYIMEGSLPEPPTAVLLHGILGSRKNWGSFARRLAQEFPKWQFLLVDLRCHGDSASLKKRGTHTVASAALDVLKLLGQLRLTPRVVVGHSFGGKVALSMVEQVPKPLARPVRVWVLDATPGEVRAGADGDNADHPAELISFLSKLPKEVSSKRDIVDALIQEGFSRDVAQWVVTNLRQTNTAGSSPSPLSWVFDLKGIAEMYQSYEETNLWKIVEDVPRGVHVNFLKAERSLHRWALEDIRRIHVAEEQAVEEGGGVEMHVLEDAGHWVHADNPDGLFKILSFSFQGF	At4g10030	XP_004241876.1	7	14	7	1.154	0.00744159	4	3	7	35.1	not assigned.no ontology	Cp	60	4	Cp	M	Cp	M	87.8	-	-	-
Lipid binding & export	Solyc09g015650	FAX2	FATTY ACID EXPORT 2, FAX2	MALSYTPTSLGLTSTQKLCNIRTSLVVRSVSKASLGFGFRTGLVPLAQHSFRNTTILPFAASHEESKPSDVELEKDNNDLKEEAEAQEEAWKQTLASFKEQAMKVQAVSQEAYEVYSDKAMIILKETSEKLKIQADKAREDWTIIAKEISEESKEYLTTAAENSPEPVKDIVETFVSSADELNDVSKVRDFYVGIPYGTLLSAGGFLYFMLSGSTAALRFGVVLGGALLALSISSLRSWRSGDSTSLALKGQAAIATILFVREFRLMLQKPFIFNFITATIRGGSILCL	At2g38550	XP_004246287.1	2	3	2	0.311	0.00200549	3	0	3	35.2	not assigned.unknown	Cp	60	3	Cp	Cp	Cp	Cp	97.6	envelope-inner-integral	plastid	plastid
	Solyc10g074580	VRSLip	Virus R/S lipocalin (NCBI)	MAALSASAHVRIRTFFHSSFTNNKISNFSQQFKLENYTTITTITTSKRSISIPALAPKTTENSASQLQSTSDSVKDSENINLKGWAEFAKNVSGEWDGFGADFSKQGEPIELPESVVPGAYREWEVKVFDWQTQCPTLARDDDAFSFMYKFIRLLPTVGCEADAATRYSIDERNISDANVAAFAYQSTGCYVAAWSNNHDGNYNTAPYLSWELEHCLIDPGDKESRVRIVQVVRLQDSKLVLQNIKVFCEHWYGPFRNGDQLGGCAIQDSAFASTKALDPAEVignaVWEGKHAISSYNNAPEKVIQELVDGSTRKTVRDELDLVVLPRQLWCCLKGIAGGETCCEVGWLFDQGRAITSKCIFSDNGKLKEIAIACESAAPAQ	At4g38225	NP_001306974.1 Sade et al (2012)	12	65	12	3.507	0.022615	5	3	8	35.2	not assigned.unknown	Cp	63	4	Cp	M	Cp	Cp	85	plastid stroma	plastid	-
	Solyc12g005180	LCNP	Chloroplast lipocalin (AHRD V1 ***- Q38JB4_SOLTU); contains Interpro domain(s) IPR013208 Lipocalin-like	MVCYNLVAQQSPPILVQSQYPSKPRGLSVKVVSSCCTECPIFGKVEVKHVISGLAASILFLSQSSMAFAADLPHYNSVFQLANVADSMPTLPLEKGNDGGKLMMMRGMTAKDFDPIRYSGRWFEVASLKRGFAGQGQEDCHCTQGIYTVDMNAPAIQVDTFCVHGGPDGYITGIRGRVQCLNEEDKEKDETDLERQEMIREKCYLRFPTLPFIPKEPYDVIATDYDNFALVSGAKDKSFVQIYSRTPNPGPEFIDRYKNYLASFGYDPSKINDTPQDCEVKTTSQLSAMMSMSGMQQALNNQFPDLELRRPVQFNPFTSVFETLKKLAELYFK	At3g47860	XP_004251473.1	8	37	8	6.017	0.0388007	5	3	8	20.2	stress.abiotic	Cp	28	4	Cp	Cp	Cp	C	55.2	thylakoid-peripheral-lumenal-side	plastid	plastid
Miscellaneous	Solyc09g005940	FAR2	Fatty acyl coA reductase (AHRD V1 **-* Q8L4M0_WHEAT); contains Interpro domain(s) IPR013120 Male sterility, DNA-binding	MTMLHLQNLFSFNTRVPINKLFFENNTHFSSNFSYKIRSNNISHLTLGINADHGIDSSSSNFIKALSNADHQGDVLAKNEIGIIDFFEAKNLLVTGATGFLAKVLIEKILRTTPKINKIYLLIRAKDKEAAFDRLTSEIIESKLFKCLKEIHGESYESFIRSKLIPVVGNIDEPNLGMDCIISQQIAQEIDLIIDSAANTTFDLRYDLALDAHVNGAYQLMMFAKKCINLKLLIHYSTAYANGEREGLQYEKPFIMGESITKEKLTSHSPSAKFPLLNAANELDFVSKLKNSIKNNDEFNKIIKELGDERAKLYGWHDTYSFTKAMGEMVIDSMRENIPIVIIRPSIITSSYEQPFPGWIQGLRIIDPAIVFYGKGEFPGVYTNPYCLIDMVPVDMVVN…	At3g11980	XP_004246728.1	5	8	5	0.585	0.00377238	3	0	3	33.99	development.unspecified	-	-	5	-	Cp	Cp	C	84.7	plastid	plastid	-
	Solyc11g072640	-	trans-2-enoyl-CoA reductase, mitochondrial (AHRD V1 **-- D2V9_EGR); contains Interpro domain(s) IPR002085 Alcohol dehydrogenase superfamily, zinc-containing	MATARIVPLKALVNGVSPWNPLSRVLRLRSRPLYSAVRDYSAAISPPSKAVVYDQHGSPDVVTRVTELPPVEIKDNDVCVRMLAAPINPSDINRIEGVYPVRPPLPAVGGYEGVGEVHAIGSAVKGLSPGDWVIPSPPSSGTWQTYVVKEQSVWQKVDKSTPMEYAATVIVNPLTALRMLEDFIALKSGDTIVQNGATSIVGQCVIQLARLRGIHSINIIRDRAGSDEAKAHLKQLGADEVYTESQLEVKNVRGLLGNIPEPVLGFNCVGGNAASLILKFLKQGGTMVTYGGMSKKPITVSTSAFIFKELTLTGFWLQRWMSSDKAEERQSMIDYLLGLCRDGKLKYELEVSPFDDFHTALEKAMGKRGRQPKQVLKF	At3g45770	XP_004251281.1	1	1	1	0.145	0.000935035	1	0	1	35.1	not assigned.no ontology	M	40	5	Cp	possibly M	Cp	M	98.3	-	peroxisome	-
Oxylipins	Solyc02g085730	AOC	Allene oxide cyclase (AHRD V1 **** Q9LEG5_SOLLC); contains Interpro domain(s) IPR009410 Allene oxide cyclase	MATVSSASAALRTISSSSSKLSSAFQTKKIQSFKLPNPLISQNHKLTTTSTTASRSFSCKSQSTSTDSTNTEVQELSVYEINERDRGSPAYLRLSQKTVNSLGDLVPFSNKLYTADLKKRIGITAGLCILIKHEEEKKGDRYEAVYSFYFGDYGHIAVQGAYLTYEETYLAVTGGSGIFAGVSGQVKLQQLIFPFKLFYTFYLKGIPGLPSELLCTAVPPSPTVEPTPEAKACEEGAALKNYTN	At3g25780	NP_001234019.1	3	23	3	1.154	0.00744159	5	3	8	17.7.1.4	hormone metabolism.jasmonate.synthesis-degradation.allene oxidase cyclase	Cp	93	1	Cp	Cp	Cp	Cp	99.2	plastid stroma	plastid	-
	Solyc11g069800	AOS2	Allene oxide synthase 2; cytochrome P450	MALTLSFSLPLPSLHQKIPSKYSTFRPIIVSLSDKSTIEITQPIKLSTRTIPGDYGLPGIGPWKDRLDYFYNQGKNDFFESRIAKYKSTIFRTNMPPGPFITSNPKVIVLLDGKSFPVLFDASKVEKKDLFTGTFVPSTELTGGYRILSYLDPSEPNHEKLKKLMFFLLSSRRNADHVIPEFHETYTELFETLDKEMEEKGTVGFNSGSDQAAFNFLARSLFGVNPVETKLGTDGPALIGKWILLQLHPVITLGLPKFLDDVLLHTFRLPPILVKKDYQRLYDFFYTNSANLFIEAEKLGISKDEACHNLLFATCFNSFGGMKIFFPNMLKSIAKAGVEIHTRLANEIRSEVKSAGGKITMSAMEKMPLMKSVVYEALRVDPPVASQYGRAKQDLKIES…	At5g42650	NP_001274707.1 Howe et al 2000	3	4	3	0.25	0.00161213	3	1	4	17.7.1.3	hormone metabolism.jasmonate.synthesis-degradation.allene oxidase synthase	Cp	31	3	-	Cp	Cp	V	63.4	thylakoid	plastid	plastid
	Solyc01g006560	LoxF	Lipoxygenase (AHRD V1 **** C0KKU8_SOLLC); contains Interpro domain(s) IPR001246 Lipoxygenase, plant	MLKPQLQQSSQSTKTLIPYWKTKPLCLASIPINTLNNKNLRVKKKKNFITKAVVSSTENSSYVQSSNIENSTSGKAIVIVQRTVGGTNLSLTRGLDDIGDLFGRSLFLSIVAAELDPKTGVEKPTIEGFARRGRDVDGNREYEVEFEIPEDFGDVGAILIENQQRKQMYVKNIVIDGFVHGKVEITCNSWVHSKYDNPDKRIFFTNKSYLPSQTPSGVKKLRETELVTLRGDGFGERKIYERIYDYDVYNDIGDPDGDGDGDGKRPVLGGKELPYPRRCRTGRARSEKDPLSESKGDFTYVPRDEAFSEVKDLSFSGNTIYAVLHAVVPGLQSIITDRDLGFPHFPAIDSLYNVEVELPALQTNSLFSIIRRLIRAISETRKDVLLFETPEFLERDKFA…	At3g45140	NP_001234259.1 Mariutto et al (2011)	31	223	26	16.302	0.105124	5	3	8	17.7.1.2	hormone metabolism.jasmonate.synthesis-degradation.lipoxygenase	Cp	54	5	Cp	possibly M	Cp	C	100	plastid stroma	plastid	plastid
	Solyc01g006540	TomLoxC LoxC	Lipoxygenase (AHRD V1 **** Q96573_SOLLC); contains Interpro domain(s) IPR001246 Lipoxygenase, plant	MLKPQFQQSTKTLIPSWNTNTLFLASFPINILNKNFILKKKNNFRVHHNYNGANTIKAVLNSTQKSIGVKAVVTVQKQVNLNLLRGLDGIGDLLGKSLILWIVAAELNADHKTGLEKPSIRSYAHRGLDVDGDTYYEAVFEIPEDFGEVGAILVENEHHKEMYVKNIVIDGFVHGKVEITCNSWVHSKFANPDKRIFFTNKSYLPSQTPSGVIRLREEELVTLRGDGVGERKVFERIYDYDVYNDLGEVDSNNDDAKRPILGGKKLPYPRRCRTGRQRSKKDPLYETRSTFVYVPRDEAFSAVKSLTFSGNTVYSALHAVVPALESVVSDPDLGFPHFPAIDSLFNVGVDLSGLSDKKSSLFNIVPRLIKSISETGKDVLLFESPQLVQRDKFSWFRDV…	At3g45140	NP_001233812.2 Heitz et al (1997)	27	189	22	7.984	0.051485	5	3	8	17.7.1.2	hormone metabolism.jasmonate.synthesis-degradation.lipoxygenase	-	-	5	Cp	-	Cp	C	100	plastid stroma	plastid	plastid
	Solyc07g049690	HPL	Fatty acid hydroperoxide lyase, Cytochrome P450 74B	MNSAPLSTPAPVTLPVRSIPGSYGLPLVGPIADRLDYFWFQKPENFFTKRMEKHKSTVFRTNVPPCFPFFGSVNPNVVAVLDVKSFSHLFDMEIVEKANVLVGDFMPSVVYTGDMRVCAYLDTSEPKHAQIKNFSQDILKRGSKTWVPTLLKELDTMFTTFEADLSKSNTASLLPALQKFLFNFFSLTILGADPSVSPEIANSGYIFLDSWLAIQLAPTVSIGVLQPLEEILVHSFAYPFFLVKGNYEKLVQFVKNEAKEVLSRAQTEFQLTEQEAIHNLLFILGFNAFGGFSIFLPTLLGNLGDEKNADMQEKLRKEVRDKVGVNPENLSFESVKEMELVQSFVYETLRLSPPVPSQYARARKDFKLSSHDSVYEIKKGELLCGYQPLVMKDPKVFDE…	At4g15440	NP_001234420.2 Howe et al 2000	9	22	9	3.642	0.0234855	5	1	6	26.1	misc.cytochrome P450	-	-	5	-	-	Cp	Cp	99.9	envelope-outer	peroxisome	plastid
	Solyc09g059040	CEQORH	Chloroplast envelope quinone oxidoreductase homolog	MSGKIMHAVQYHSYGGGAAALKHVEVPVPTPNKDEVLVKVEATSINPLDSKIQKGMLRPFLPSKFPFIPTTDVAGEVVEVGSNVKSFKAGDKVVAMLSTKSGGGLAEYVVPKDSLTVSRPAEVSAAEGAGLVIAGLTALQALVNPAEVKLDGTGPRKNILVTAASGGVGHYAVQLAKLGNAHVTATCGARNIDFVKSLGADEILDYKTPEGAALKSPSGQKYDAVINCTTGIPWSTFEPNLSSSGKVIDLTPGASSMLTFAVKKLTFSKKQLVPFLVNANKENLELLVKLVKEGKLKTVIDSKFPLSKAEDAWSRSIDGHATGKILVEP	At4g13010	XP_010326282.1	2	7	2	0.413	0.00266324	3	0	3	'10.7.2.1'	'Redox homeostasis.reactive electrophilic lipid homeostasis.oxylipin carbonyl degradation.plastidial oxoene reductase *(ceQORH))'	-	-	3	-	none	Cp	Cp	98	envelope-inner-peripheral-stromal-side	cytosol	plastid
	Solyc09g059030	CEQORH	Chloroplast envelope quinone oxidoreductase homolog	MAGKIMHAVQYDSYDGGAAALKHVEVPVPTPKKDEVLLKLEAASINPVDWKIQKGMLRPLLPTKFPFIPTTDVGGEVVEVGSNVKSFKAGDKVVAMLNTLNGGGLAEYAVANESLTVPRPAEVSAAEGAGLVIAGLTALQAFVNPAEVKLDGTGPRKNILVTAASGGVGHYAVQLAKLCNTHVTATCGARNIDFVKSLGADEVLDYKTPEGAALKSPSGQKYDAVIHCTTGIPWSTFEPNLSSSGKVVDITPGVNAMWTFAVKKLTFSKKQLVPLLLIPKKENLELIVGLVKEGKLKTVVDSRFPLSKAEDAWSKSIDGHATGKIVVEP	AT4G13010	XP_010326282.1	1	1	1	-	0	0	1	1	10.7.2.1	'Redox homeostasis.reactive electrophilic lipid homeostasis.oxylipin carbonyl degradation.plastidial oxoene reductase *(ceQORH))'	-	na	2	-	-	Cp	C	53.57	envelope-inner-peripheral-stromal-side	cytosol	plastid
A Proteins were identified by acetone preparations and/or the gel method. For emPAI and Mol% calculations, only the data from the acetone prepartions were used. Proteins identified solely by the gel method have data for the number of peptides, PSMs and unique peptides.
B Names of tomato proteins were based on the literature, NCBI annotation (identified in BlastP searches), and/or SolyGenomics descriptor. In a small number of cases, tomato protein names were assigned based on NCBI annotations and the Arabidopsis homolog.
C Some Sol Genomics descriptors were updated when NCBI annotations and Arabidopsis gene annotations were aligned.
D Target P's subcellular locations are: chloroplast (Cp), mitochondria (M), secretory (S), and no predicted location is indicated by a dash (-).
E ChloroP was used to predict the presence of a chloroplast transit peptide (Y) and the lack of a predicted transit peptide is indicated with a dash (-).
F Predotar's predicted subcellular locations were: chloroplast/plastid (Cp),endoplasmic reticulum (ER) or mitochondrion (M). For proteins with localization predictions that were less clear, Predotar provided categorized of possibly Cp, M and ER. Proteins with unresolved locations or that did not have a homolog detected by Predotar are indicated with a dash (-).
G WoLF PSORT's and YLoc's predicted subcellular locations were: chloroplast/plastid (Cp), cytosol (C), cytoskeleton (Cy), endoplasmic reticulum (ER), extracellular (EX), golgi apparatus (G), mitochondrion (M), nucleus (N), peroxisomes (P), plasma membrance (PM), and vacuole (V). Proteins with no chloroplast location in WoLF PSORT are indicated by not Cp.The number of proteins predicted to be in t…

## Sheet: Table S8F -Stress
Table S8F . Biotic and abiotic stress-associated proteins
Gene and protein descriptors							ProteomicsA								Bin codes		Algorithms								Databases
Category	Tomato Gene ID	Gene nameB	DescriptionC	Protein Sequence	Arabidopis homolog	Tomato proteinB NCBI accession	Peptides	PSMs	Unique Peptides	emPAI	Mol%	Acetone samples	Gel samples	Total	Bincode	Name	TargetP D ver.1	Transit peptide length	TargetP (reliability class)	ChloroP E	Predotar F	WoLF PSORT G	YLoc G	YLoc % Confidence	PPDB	SUBA4	plprot
Biotic stress - Miscellaneous	Solyc12g096590	COS1	Coronatine insensitive suppressore 1; 6 7-dimethyl-8-ribityllumazine synthase (AHRD V1 ***- B2CM14_SOLCH); contains Interpro domain(s) IPR002180 6,7-dimethyl-8-ribityllumazine synthase	MAASAFGQCSLLPRTVSLNPQQSHRQLCSLSFHRQTVNSSLPALSFTQSIGFGSAIERHCVDRNGSDLFKTDAVRQLNGSVISAKGHRFAIVVARFNDLITKKLLEGALETFKNYSVREEDIDVVWVPGCFEIGVTAQLLGKSQKYHAILCIGAVIRGDTSHYDAVVNAATSGVLSAGLNSGTPCIFGVLTCDTLEQAFNRVGGKAGNKGSETALTAIEMASLFEHHLKPSE	At2g44050	XP_004253044.1	3	8	1	1.154	0.00744159	1	1	2	18.3.2	Co-factor and vitamine metabolism.riboflavin.riboflavin synthase	Cp	61	3	Cp	Cp	Cp	Cp	100	plastid	plastid	plastid
	Solyc08g015660	COS1	6 7-dimethyl-8-ribityllumazine synthase (AHRD V1 **** Q5ZQU1_TOBAC); contains Interpro domain(s) IPR002180 6,7-dimethyl-8-ribityllumazine synthase	MATTAFVEFSVVVRPQSNFVNTSYLQQLHSHRPFLFLSIPKSTAALSFTQSQGFGCGIERQQCDRRDFVQTSAVRELAGSLISAQGHRFAIVVARFNDLITKKLLEGALNTFKSYSVREEDIDVVWVPGSFEIGVVAQQLGKSRKYQSILCIGAVIRGDTSHYDAVVNAATSGVLSAGLNSGTPCIFGVLTCDTLEQAFDRVGGKAGNKGAEAALTAIEMASLFEHHLKPLQ	At2g44050	XP_004244782.1	3	9	1	2.728	0.0175916	1	0	1	18.3.2	Co-factor and vitamine metabolism.riboflavin.riboflavin synthase	-	-	5	Cp	possibly Cp	Cp	Cp	100	plastid	plastid	plastid
	Solyc09g090330	FBN4 HrBP1	Fibrillin 4; Harpin binding protein 1 (AHRD V1 **-- Q5QJB4_SOLLC); contains Interpro domain(s) IPR006843 PAP fibrillin	MASLLHSRLPLSHNHSLSNSCQSFPCHLPGRSKRSTQRLLEERSYDSKRSLVCQSGIDEVTFIEPPGSKEAEAELIGSLKLKLLSAVSGLNRGLAASEDDLKKADEAAKELESCAGAVDLAADLDKLQGRWKLIYSSAFSSRTLGGSRPGPPTGRLLPITLGQVFQRIDVLSKDFDNIVELELGAPWPFPPVEATATLAHKFELIGSSTIKIIFEKTTVKTTGNLSQLPPLEVPRIPDQFRPPSNTGSGEFEVTYIDSDTRVTRGDRGELRVFVIS	At3g23400	NP_001234460.1	10	112	10	11.115	0.0716753	5	3	8	31.1	cell.organisation	Cp	53	4	Cp	Cp	Cp	M	43.8	plastoglobules	plastid	-
	Solyc06g036330	SARD4	Ornithine cyclodeamise protein (AHRD V1 ***- A3I2L0_9BACT); contains Interpro domain(s) IPR003462 Ornithine cyclodeamise/mu-crystallin; SAR deficient 4	MATPPPIFISTATLHTLLTHKSLVNADHLQFSLPTFASTTESPLRHAHQTSPSTSLLLMPCWSRAPSLPYIGVKLVTYHPNNSTQNLPGVHASYVLFNSITGQTLSTMDATELTVYRTACTSALASKFLSRQDSETLLMIGAGTLAPHLIKAHLTVRPNLKKVIVWNRTADKAKRVIENLQSEASFEGVSFESNASLEEVVGLGDIVSCATNSGTPLVKGKKLKEGAHLDLVGSFKHSMRECDDEALKRGKVFVDNEAAMVEAGELVGAFERGAITRDDIVGDLLELIKGEKNGRTTAEEITVFKSVGSAVVDLITAQLAYETYMKSH	At5g52810	XP_004240714.1	2	4	2	0.778	0.00501695	3	3	6	16.99	secondary metabolism.flavonoids.chalcones	Cp	43	4	Cp	Cp	Cp	C	63.6	-	plastid	-
	Solyc02g083280	SAG1	Senescence associated gene 1; Thiosulfate sulfurtransferase/rhodanese-like domain-containing protein 1 (AHRD V1 *--* TSTD1_HUMAN); contains Interpro domain(s) IPR001763 Rhodanese-like	MRTISLHSTSFSLVEFHGTKNLAQSRINRSVSLIPMARSQFQPKIRRDIGTSNRNPSFSWMATVGEKVHNSTVPTSVPVRVALELLQAGHRYLDVRTTEEYNDGHAAGAINIPYMLRIGSGMIKNPNFLEEVLEQFGKDDEIIVGCQLGKRSFMAATELLAAGFTGVTDIAGGYAAWTESGLPIES	At4g35770	XP_004232533.1	3	49	3	1.848	0.0119169	5	3	8	33.99	development.unspecified	Cp	46	3	Cp	Cp	Cp	C	97.8	plastid	plastid	-
R genes, effector targets & ETI	Solyc08g081170	MURE PAP11	Hop interacting protein; UDP-N-acetylmuramoyl-L-alanyl-D-glutamate--2 6-diaminopimelate ligase (AHRD V1 *-** D7UXP7_LISGR); contains Interpro domain(s) IPR005761 UDP-N-acetylmuramoylalanyl-D-glutamate-2,6-diaminopimelate ligase	MPFTLLSPPPFPSLLHHTLPPLQFKPFISLHHLRLKHPTTLTTVSAIGADGKYYPTPSDDDPPEAPEDSMHGVNKFQQIQRQAAKARKQQEELFKKEQSIFVNALADVEDAPDNPLVHDSDSGDDLFGEIDKAIALKRKDFVKQGLLKPNPKKSALVEVEVEGIDELLPEEVVDLEEISELTGLTEISEGEESEEDRSDFEVSDDVVKAEFSDLSSFDIDFDEYGKAKPRIAEPKFRMSLAELLDESRVVPVSVYGDLEVEISGIQHDSRLVESGDLFVCCVGMKTDGHLYLSEADKRGAVAVVASKEIDIEETLGCKALVIVEDTNAVLAVLAASFYRHPSKSMSVignaVTGTNGKTTTSYLIKAMYGAMGLRTGMLSTVGYYIYGDNKLESPHTTP…	At1g63680	XP_010325293.1	2	5	2	0.172	0.00110915	5	2	7	33.99	development.unspecified	M	82	5	-	Cp	Cp	PM	39	plastid nucleoid	plastid	-
	Solyc04g081070	ARC6	Hop-interacting protein THI044, ACCUMULATION AND REPLICATION OF CHLOROPLASTS 6, ARC6	MEALTHLSFGICTARLSPPYQLAGGVGKKPPRLNAVTGGASSVTGGTSSVPTNFSASKWADRLLADFQFLPSTTTTSDSSDFQNSTSTTSVTTIPPPVAPSDRHISMPIDFYRVLGAEAHFLGDGIrRNACYDARITKPPQYGYSQEALIGrRNAQILQAACETLADSTSrRNAEYNQGLAQHEFDTILTPVPWDKVPGALCVLQEAGETGVVLQIGESLLKERLPKSFKQDVVLAMALAYVNADHSRDAMALSPPDFVQGCELLERALKLLQEEGASNLALDLQSQIDETLEEINPRYVLELLAFPLGDEYRMKRVEALQGVRNILWAVGGGGAAAISGGFTREDFMNEAFLRMTAAEQVDLFVATPSNIPAESFEVYGVALALVAQAFVGKKPHLIQ…	At5g42480	NP_001265966.1	5	7	5	0.403	0.00259875	3	0	3	20.2.1	stress.abiotic	Cp	98	5	Cp	Cp	Cp	Cp	42.9	envelope-inner	plastid	-
	Solyc05g055850	RPH1	Resistance to Phytophthora 1, RPH1	MNLATTMSASVLNYQILKFFPPQKNGFLRSPLIRGKSCRFCVSASSNELNKQVIEDPKEEIQVKSDGVIVNSTEEDEEERSGENSTSTGPSTVLDNKELKKAVLKTASTFAPRASTATKNPAKPGTVLYTVFEVQAYASMLIGGALSFNLIFPSTEPDIWRLMGMWSIWMFTIPSLRARDCSKDEKEALNYLFLLVPLLNVAIPFFLKSFAVVWSADTVAFLGMYAWKLGWLQKEQ	At2g48070	XP_004239692.1	1	9	1	0.874	0.00563601	5	0	5	35.2	not assigned.unknown	Cp	43	3	Cp	possibly M	Cp	Cp	99.6	plastid	plastid	-
	Solyc08g006070	AIG2-like	AIG2-like protein; IPR013024 Butirosin biosynthesis, BtrG-like	MASSSQSVFNVFVYGSLLADDIVRALLKRVPPSNPAILHNYHRFSIKGRVYPAILPVENKRVNGKVLLDINVPELNILDAFEDVEYERTTVDVSLMDSSKTLQVETYVWVNKRDPDLHGEWDFEEWKVLHKGDFLTMTMEFSEEMELPESKTRVATYESFYAQEENKSKP	At4g31310	XP_004244465.1	7	30	6	45.416	0.292866	5	3	8	20.1	stress.biotic	S	-	3	-	-	Cp	Cp	91.14	-	-	-
Biotic stress - lipids	Solyc05g056540	ADH1B	Alcohol dehydrogenase-like protein (AHRD V1 **** Q8LDF7_ARATH); contains Interpro domain(s) IPR002085 Alcohol dehydrogenase superfamily, zinc-containing	MSFPHIIRSAIRSTSSKIALLARSTTPFTNRSFCSSFESEKNSTAPSEASYYHLSGGPSHMRAAVFWEPGKPLTFEDFHMPRPKANEVLIKTKACGVCHSDLHVIKGELPFASPCVVGHEITGEVVEHGQLSDSKIIERFPVGSQVVGAFIMPCGSCSFCSKGQDDLCEDFFAYNRAKGTLYDGETRLFLRNSGKPVYMYSMGGLAEYCVVPAHALAVLPNSLPYTESAILGCAVFTAYGAMAHAAEVRPGDAIAVignaIGGVGSSCLQIARAFGASEIIAVDVQDEKLQKAKFLGATHCVNASKVDAVKTIKDITGGSGVDVAVEALGRPQTFLQCVQSVRDGGKAVMIGLTLSGVKGEVDINHLVRRQIKVignaSYGARARQDLPKLIKLAESGI…	At5g63620	XP_004239630.1	3	5	3	0.501	0.00323071	3	2	5	35.1	not assigned.no ontology	Cp	35	3	Cp	M	Cp	C	93.6	-	-	-
	Solyc08g005220	FBN2A	Plastid lipid-associated protein 3, chloroplastic (AHRD V1 **-- PAP3_BRACM); contains Interpro domain(s) IPR006843 PAP fibrillin	MSILPLHSLIFNVNTTVKSYCYTSFLPSSSISSYRFRKLSEFSTHSSFDDSRELFVPKTKQNDDDSDDKPFSFVDEWGERSKPELRPTTKLSESDPPIDVDEWgranaELGINNFSGIEDEWGEKSFPELRPEKTVSDSDPPIDEDEWIGAKLTGNNFIDRVSNQGVSEPESTEEDGWDEAEVVGRINAGVEEDERVAEMKRCLIDTVYGTDFGLRASSEVRAEALELVAKLEAANPTPTTVELLDGNWILVFTAFSELLPLLAVGTIPLLKVEKISQTISTSSLTIENSTTLSSPVATSSFSATAIFEVQSSSRIQVEIKEGTFKPPEIKSKIDLPENMDIFGQNISLSPLQQSLGPLENVVAGIARTISGLPPLKVPIPGERTKSWLITTYVDSDLR…	At2g35490	XP_004244405.1 Laizet et al (2006)	9	30	8	1.976	0.0127423	5	3	8	31.1	cell.organisation	Cp	27	4	Cp	Cp	Cp	Cp	96.5	plastoglobules	plastid	plastid
	Solyc06g053480	FAB2	Stearoyl-acyl carrier protein desaturase (AHRD V1 **** B7TZ44_SPIOL); contains Interpro domain(s) IPR005067 Fatty acid desaturase, type 2	MALKLNAFNFQSHKYSSSFVHPPMLSLRSPKFFMAASLTSGTKEVENLKKPFSPPREVHVQVTHSMPPQKIEIFKSLEGWAEQNLLTLLKPVEKSWQPQDFLPDPASDGFHDQVKELRERAKELPDDYLVVLVGDMITEEALPTYQSMINTLDGVRDETGASPTSWAIWTRAWTAEENRHGDLLNKYLYLSGRVDMRAIEKTIQYLIGSGMDPRTENSPYLGYIYTSFQERATFISHGNTARFAKEHGDIKLAQICGTIAADEKRHETAYTKIVEKLFEIDPDGTVLAFADMMRKKIAMPAHLMYDGRDDNLFNADHFSAVAQRLGVYTASDYADILEFLVGRWKVSDLTGLSGEGRKAQEYLCGLTARIrRNALEERAQVRAKQGPIMPFSWIYDREV…	At2g43710	XP_004241001.1	8	67	6	5.31	0.0342416	5	3	8	11.1.15	lipid metabolism.FA synthesis and FA elongation.ACP desaturase	Cp	34	5	Cp	Cp	Cp	Cp	100	plastid stroma	plastid	-
	Solyc07g049690	HPL	Fatty acid hydroperoxide lyase, Cytochrome P450 74B	MNSAPLSTPAPVTLPVRSIPGSYGLPLVGPIADRLDYFWFQKPENFFTKRMEKHKSTVFRTNVPPCFPFFGSVNPNVVAVLDVKSFSHLFDMEIVEKANVLVGDFMPSVVYTGDMRVCAYLDTSEPKHAQIKNFSQDILKRGSKTWVPTLLKELDTMFTTFEADLSKSNTASLLPALQKFLFNFFSLTILGADPSVSPEIANSGYIFLDSWLAIQLAPTVSIGVLQPLEEILVHSFAYPFFLVKGNYEKLVQFVKNEAKEVLSRAQTEFQLTEQEAIHNLLFILGFNAFGGFSIFLPTLLGNLGDEKNADMQEKLRKEVRDKVGVNPENLSFESVKEMELVQSFVYETLRLSPPVPSQYARARKDFKLSSHDSVYEIKKGELLCGYQPLVMKDPKVFDE…	At4g15440	NP_001234420.2 Howe et al 2000	9	22	9	3.642	0.0234855	5	1	6	26.1	misc.cytochrome P450	-	-	5	-	-	Cp	Cp	99.9	envelope-outer	peroxisome	plastid
	Solyc12g005180	LCNP	Chloroplast lipocalin (AHRD V1 ***- Q38JB4_SOLTU); contains Interpro domain(s) IPR013208 Lipocalin-like	MVCYNLVAQQSPPILVQSQYPSKPRGLSVKVVSSCCTECPIFGKVEVKHVISGLAASILFLSQSSMAFAADLPHYNSVFQLANVADSMPTLPLEKGNDGGKLMMMRGMTAKDFDPIRYSGRWFEVASLKRGFAGQGQEDCHCTQGIYTVDMNAPAIQVDTFCVHGGPDGYITGIRGRVQCLNEEDKEKDETDLERQEMIREKCYLRFPTLPFIPKEPYDVIATDYDNFALVSGAKDKSFVQIYSRTPNPGPEFIDRYKNYLASFGYDPSKINDTPQDCEVKTTSQLSAMMSMSGMQQALNNQFPDLELRRPVQFNPFTSVFETLKKLAELYFK	At3g47860	XP_004251473.1	8	37	8	6.017	0.0388007	5	3	8	20.2	stress.abiotic	Cp	28	4	Cp	Cp	Cp	C	55.2	thylakoid-peripheral-lumenal-side	plastid	plastid
	Solyc08g061140	OCP3	Over-expression of cationic peroxidase (NCBI), Homeobox transcription factor (ISS) (AHRD V1 *-*- Q018M5_OSTTA); contains Interpro domain(s) IPR001356 Homeobox	MASSSTTLGISIRLGCSSNEHLMLVHPRSRTNIALLFHSYSSRLVTFSRRRNNSAITSSNKKKKSPPRKDTEEVGDIDEDAFEALFQLLEEDLKNDELSLDDDDITEEDLAKLERELEEALKDDELLGEIDSIANENTESSMAKDEEAVAEDANGDDDDEDVDMLVKLKNWQLKKLAYALKKGRRKLNIKNLAADLCLDRAVVLEMLRNPPPNLVLLSAALPDEPVPRMLEAASKPLETVPIEMSDAVKPDAKVETPVHVMQSNWSAQKRLKKVQLETLEQVYRRSKRPTNAMISSIVHVTNLPRRRVLKWFEERRSEEGVPAHRLPYQPSSISE	At5g11270	XP_004245032.1	1	2	1	0.194	0.00125101	2	0	2	35.2	not assigned.unknown	Cp	57	1	Cp	Cp	Cp	N	100	-	-	-
	Solyc08g074680	PPO-A	Polyphenol oxidase (AHRD V1 *-*- Q41428_SOLTU); contains Interpro domain(s) IPR002227 Tyrosinase	MASVVCNSSSSTTTTTLKTPFTSLGSTPKPSQLFLHGKRNKTFKVSCKVINNNGNQDETNSVDRRNVLLGLGGLYGVANAIPLAASATPIPSPDLKTCGRATISDGPLVPYSCCPPPMPTNFDTIPYYKFPSMTKLRIRTPAHAVDEEYIAKYNLAISRMRDLDKTEPLNPLGFKQQANIHCAYCNGAYIIGGKELQVHNSWLFFPFHRWYLYFYERILGKLIDDPTFALPYWNWNADHPKGMRLPPMFDREGSSLYDERRNQQVRNGTVLDLGSFGDKVETTQLQLMSNNLTLMYRQMVTNAPCPLLFFGAPYVLGNNVEAPGTIETIPHIPVHIWAGTVRGSKFPNGDVSYGEDMGNFYSAGLDPVFYCHHGNVDRMWNEWKAIGGKRRDISEKDWL…	-	NP_001318057.1 Newman et al (1993)	20	115	18	1.886	0.0121619	5	0	5	35.2	not assigned.unknown	Cp	46	2	Cp	Cp	Cp	Cp	100	-	-	-
	Solyc08g074620	PPO-E	Polyphenol oxidase (AHRD V1 ***- Q41428_SOLTU); contains Interpro domain(s) IPR016213 Polyphenol oxidase, plant	MSSSSSITTTLPLCTNKSLSSSFTTTNSSLLSKPSQLFLHGRRNQSFKVSCNANNVDKNPDAVDRRNVLLGLGGLYGAANLAPLATAAPIPPPDLKSCGTAHVKEGVDVIYSCCPPVPDDIDSVPYYKFPSMTKLRIRPPAHAADEEYVAKYQLATSRMRELDKDPFDPLGFKQQANIHCAYCNGAYKVGGKELQVHFSWLFFPFHRWYLYFYERILGSLINDPTFALPYWNWNADHPKGMRIPPMFDREGSSLYDEKRNQNHRNGTIIDLGHFGKEVDTPQLQIMTNNLTLMYRQMVTNAPCPSQFFGAAYPLGSEPSPGQGTIENIPHTPVHIWTGDKPRQKNGEDMGNFYSAGLDPIFYCHHANVDRMWNEWKLIGGKRRDLTDKDWLNSEFFFYD…	-	XP_004246029.3 Newman et al (1993)	31	853	3	233.623	1.50652	5	1	6	35.2	not assigned.unknown	Cp	50	1	Cp	Cp	Cp	Cp	100	-	-	-
	Solyc08g074630	PPO-F	Polyphenol oxidase (AHRD V1 ***- Q41428_SOLTU); contains Interpro domain(s) IPR016213 Polyphenol oxidase, plant	MSSSTPNTLPLLSTNKSLSSPFTNNHSTFLSKPSQPFLHGRRCQSFKVSCNVGEHDKNLDAVDRRNVLLGLGGFYGAANLAPLASAAPIPPPDLKSCGVAHIDDKGTEVSYSCCPPVPDDIDSVPYYKFPPMTKLRIRPPAHAADEEYVAKYQLATSRMRELDKDPFDPLGFKQQANIHCAYCNGAYKIGGKELQVHFSWLFFPFHRWYLYFYERILGSLINDPTFALPYWNWNADHPKGMRIPPMFDREGSSLYDEKRNQNHRNGTIIDLGHFGKDVETPQLQIMTNNLTLMYRQMVTNAPCPSQFFGAAYPLGSDPEPGMGTIENIPHTPVHIWTGDSPRQGHGEDMGNFYSAGLDPLFYCHHANVDRMWNEWKLIGGKRRDLSNKDWLNSEFFFYD…	-	NP_001318059.1 Newman et al (1993)	34	917	5	302.027	1.94763	5	2	7	35.2	not assigned.unknown	Cp	49	1	Cp	Cp	Cp	Cp	100	-	-	-
ROS & cell death	Solyc11g066440	PAO ACD1	Pheophorbide a oxygenase, chloroplastic; lethal leaf spot 1-like protein (NCBI)	MVSSLLLPTPQILSISSSLQSSLPFKPHNFLQITRKKNTLISSPLRVAAPPTTTTATEEEEKLDSKSSDIEDTENDEQDSSSKFSWRNADHWYPVSLVEDLDPSLPTPFQLLNRDIVIWFDKSGSQWVALDDKCPHRLAPLSEGRLDENGDLQCSYHGWSFNGCGSCTRIPQAASQGPEAKAFQSPRACATRFPTMVSQGLLFVWPDENGWERAQATKPPMLPEDFDKPEFATVTIQRDLFYGYDTLMENVSDPSHIDFAHHKVTGRRDRAKPLPFKMEASGPWGFAGANNDKPKITAKFVAPCYSMNKIEIDTKLPIVGDQKWVIWICSFNVPMAPGKTRSIVCSARNFFQFTVPGPAWWQVFPRWQEHWTSNKVYDGDMIVLQGQEKVFLSKSKENG…	At3g44880	NP_001234535.2	1	3	1	0.105	0.000677094	3	0	3	31.5.1	cell.cell death.plants	Cp	55	1	Cp	Cp	Cp	PM	85.5	thylakoid	plastid	plastid
	Solyc03g044470	RCCR ACD2	Red chlorophyll catabolite reductase (Fragment) (AHRD V1 **** Q1ELT8_SOLLC); contains Interpro domain(s) IPR009439 Red chlorophyll catabolite reductase (ACD2)	MAVPLSSAKFHTSILTQSLPSSSSRSFSVGKRFCCSSSSTSMEHHESKFKEFPYASVPHRELMVELVSTVENRLGESLLPCTLPSHVQYFENESATAHASLYVRSGNSSSQVDFILGSWVHCNLPTGGALNITSLSVYLRPSTDAPNFLIEVIQSSPTTLILILDLPPRKDLVQHPDYLKTFYEETQLDKQRQLLEKLPEVKPYFSSSLYIRALVSPSAILVSIETDPSQAIRIDEIIQNADHISPVAKVMLDTWLNLCACTErRNALTDDESKDLAKRDQIIKNKTIEIDLESSFPRLFGQQVANQVLGVLREIYNS	At4g37000	XP_004234668.1	7	38	7	5.105	0.0329197	5	3	8	20.1	stress.biotic	Cp	34	1	Cp	Cp	Cp	Cp	100	thylakoid mitochondria	plastid	plastid
	Solyc02g091560	SHM1	Serine hydroxymethyltransferase IPR001085 Serine hydroxymethyltransferase	MAMAIALRRLSATIDKPVKSLYNGGSIYYMSSLPNEAVYDKEKSGVAWPKQLPLEVVDPEIADIIEHEKARQWKGLELIPSENFTSVSVMQAVGSVMTNKYSEGYPGARYYGGNEYIDMAETLCQKRALEAFRLDPAKWGVNVQPLSGSPANFHVYTALLKPHERIMALDLPHGGHLSHGYQTDTKKISAVSIFFETMPYRLDESTGYIDYDQLEKSATLFRPKLIVAGASAYARLYDYDRIRKVCNKQKAILLADMAHISGLVAAGVIPSPFDYADVVTTTTHKSLRGPRGAMIFYRKGVKEVNKQGKEVFYDYEDKINQAVFPGLQGGPHNHTITGLAVALKQATTPEYRAYQEQVLSNSAKFAQALEEKGYELVSGGTDNHLVLVNMKNKGIDGSR…	At4g37930	XP_004231981.1	17	86	12	6.667	0.0429923	5	3	8	25.1	C1-metabolism.glycine hydroxymethyltransferase	-	-	5	-	M	Cp	M	65.95	-	mitochondrion	plastid
	Solyc04g073990	ANN1	Annexin IPR009118 Annexin, type plant	MASLTVPAEVPSVAEDCEQLRSAFKGWGTNEKLIISILAHRAQRKLIRQTYAETFGEDLLKELDRELTHDFEKLVVVWTLDPAERDAYLAKEATKRWTKSNFVLVEIACTRSPKELVLAREAYHARNKKSLEEDVAYHTTGNADHRKLLVPLVSSYRYGGDEVDLRLAKAESKVLHEKISDKAYSDDEVIRILATRSKAQLTLNHYKDEYGEDILKQLEDEDEFVALLRATIKGLVYPEHYFVEVLRDAINRRGTEENADHLTRVIATRAEVDLKTIANEYQKRDSVPLGRAIAKDTGGDYENMLVALLGQEEE	At1g35720	XP_001234104.1	4	7	4	0.73	0.00470742	5	2	7	31.1	cell.organisation	-	-	3	-	-	Cp	C	87.58	-	peroxisome	-
Salt stress & osmoprotection	Solyc03g096850	ENH1	Similar to AtENH1 (enhancer of SOS3)	MASAVVAGAASSSCSVSYSRNLSITKSNSSIPSLKSSTTPSQRTSFQGLSLQEAKRGVSNTFLGAESKRNATSNGGSRGLEITARKAAAAKNIEVEVDKPLGLTLGPKQGGGVLITGIDNGGNAARAGLKVGDQVVYTSSFFGDELWPADKLGFTKTAIQAKPDSVYFVISRGADVDVKRLPKRPAPPQFGRKLTDAQKARATHICLDCGYIYTLPKSFDEQPEDYACPQCIAPKKRFARYDVNTgranaIGGGLPPIGVIIGLIAGIGGVGALLVYGLQ	At5g17170	XP_004235309.1	3	5	3	0.54	0.0034822	4	2	6	29.8	protein.assembly and cofactor ligation	Cp	85	1	Cp	Cp	Cp	Cp	99.9	thylakoid	plastid	plastid
	Solyc07g008310	CMO-like	Choline monooxygenase-like; Rieske (2Fe-2S) domain protein (AHRD V1 **-- Q024N8_SOLUE); contains Interpro domain(s) IPR001663 Aromatic-ring-hydroxylating dioxygenase, alpha subunit	MVVLQKFTSFHQFNKHKSSSIQFFTCPVKPKKHHFSFKISCNYNQKLVLEFNPKIPIEEAITPPSSWYTDSCFYTHELNQVFFKGWQSVGYTEQIKEPRQYFTGRLGNVEYVVCRDDGGKIHAFHNVCRHHASLLASGSGKSSCFVCPYHGWTYGLDGALLKATRITGIKNFKVNEMGLIPMRVAVWGPFILLNFENGVLPEQESDFDLVGNEWLGSSSQILADGGVDASLSFLCRREYAIDCNWKVFCDNYLDGGYHVPYAHKGLASGLTLESYSTTIFEKVSIQRCETGSAGKDQDFHRLGSKALYAFVYPNFMINRYGPWMDTNLVLPQGPRKCLVIFDYFLDSSVKGDESFIAQGLKDSETVQMEDIKLCEGVQRGLESPAYCSGRYAPQVEKAM…	At4g29890	XP_004242785.1	1	2	1	0.096	0.000619058	2	0	2	11.3.9	lipid metabolism.Phospholipid synthesis.choline monooxygenase	-	-	5	Cp	possibly M	not Cp	Cp	99.7	-	-	-
	Solyc03g094175	-	Pterin-4-alpha-carbinolamine dehydratase (AHRD V1 *-** B6T9C1_MAIZE); contains Interpro domain(s) IPR001533 Transcriptiol coactivator/pterin dehydratase; RuBisco Assembly protein	MAAATHLSFSPPISVSSLPLRKPNFVTPNLQTSQSRICTRIRCNTNLLGDFGARDPFPAEVESKFGEKVLGNPDtheKILIPAASALSLANQECTDISPNQTPLSEFEAKQLLFKVVGWRIANEDGVLKLQCTWKLKDFDCGVELINRIGKVVEGTGHLPTLHQLQQSNQVHAELWTPSIGGLSMNDFIIAAKIDQVKTSDLVPRKRVWA	At5g51110	XP_004253324.1	5	15	5	4.623	0.0139417	3	3	6	35.2	not assigned.unknown	Cp	58	1	Cp	Cp	Cp	Cp	99.94	plastid stroma	plastid	-
Kirola proteins	Solyc04g005700	KIROLA	Kirola [Solanum lycopersicum, 1e-104, 100%]; Polyketide cyclase/dehydrase and lipid transport superfamily protein, manual annotation	MGLKGKLIASVEMKCGEGSFFDIFHINTNQVPNISPKNIVHFGIHEGESVKTGSIVSWKYNEAGQEMYMKHLIEAADPQQKLIKWKVIEGDLLKLYKYCNFTTSCDGQWTTWTIDYEKKTEDTPEPLLHLGVILAMTKDIESHLLKK	At5g28010	XP_004237017.1	4	21	3	12.895	0.0831536	5	3	8	20.2.99	stress.abiotic	-	-	5	-	-	not Cp	C	73.57	-	-	-
	Solyc08g023660	KIROLA-like	Kirola-like protein, Major latex-like protein IPR000916 Bet v I allergen	MGLKGKLISQIETKCSGHLLHEHFKSNPHKTSAMAPDKITNFTLHEGQLGKTNSVVSWNYILGGKERHAKQVLHIDDEEKSITFNFKEGYMNELYKSMTLTLTLIAEKNFITWTLVYEKLNENTPEPLDFIEFLIYLIKDLETHHVGK	At1g70840	XP_004244869	3	13	3	1.31	0.00844756	5	3	8	20.1	stress.biotic	-	-	2	-	-	not Cp	Cp	60.54	-	-	-
	Solyc04g007820	KIROLA-like3	Kirola-like protein, Major latex-like protein IPR000916 Bet v I allergen	MSRKGKLIVSLEVKCGGHSIHDIFRTNTQHLSTISPSRVKHFEIHEGEKGEIGSVASWKYYEDGKEMFVKTVIEAIDPQTNSISWNVIEGNLLDLYNSFTVITSSEHEWITYTLVYEKKTEDTPEPLALMHYCVGVIKDTESHLLKN	At1g70890	XP_004237024	3	15	3	2.728	0.0175916	5	3	8	20.1	stress.biotic	-	-	4	-	possibly M	not Cp	C	58.1	-	peroxisome	plastid
	Solyc04g007010	KIROLA-like1	Kirola-like protein, Major latex-like protein IPR000916 Bet v I allergen	MGLKGKLIGSIEVKCGGSPIHDILHTNTHFLPNITPRVLNHFEIHEGETIKIGSVVSWKFHQDGKEIFLKEMIESVDLEKKSITWKVignaGNMLESYNSFTIITSSEYQWTTVTLMYEKKTEDTPEPLTLLNIFLTGLKDIESHLLK	At1g70890	XP_004237022	6	32	5	67.129	0.432883	5	2	7	20.2.99	stress.abiotic	-	-	3	-	-	not Cp	C	70.92	-	peroxisome	plastid
	Solyc04g007790	KIROLA-like2	Kirola-like protein, Major latex-like protein IPR000916 Bet v I allergen	MGLNGKLVVSMEVKCGGHLFHDLYQTSSHHVTNISSDKVHHFDIHEGEDLRAGSIIGWKYTHDGKVKVTKQLIEAVDEEKKSITWKVLEGDTLELYNSFTISASFEDNWATWTFVYEKKTEDTPEPVTLLKLMIDITRDLEGHLHKI	At1g70890	XP_004237021	7	27	7	15.681	0.101119	5	3	8	20.2.99	stress.abiotic	-	-	4	-	-	not Cp	C	88.7	-	peroxisome	plastid
Miscellaneous functions	Solyc09g098580	RSH1	RELA/SPOT HOMOLOG 1; GTP pyrophosphokinase (AHRD V1 *-** Q3A9Z8_CARHZ); contains Interpro domain(s) IPR007685 RelA/SpoT	MAFATSMSVSIECMNICKSWKGDVSGRLDCSVLSCAWKAPRALTGFLASTTHPSQCSSTPFERYGRTDRLRRCRCYTSDMDERYPVEVLRGVPGSMLLLSASSNWKLCCSSSFSSESFEEISPESLWEDLKPTISYLSCKELELVNKALNLAFEAHDGQKRRSGEPFIIHPIAVAQILGQLELDWESVAAGLLHDTVEDTDVVTFERIEKEFGATVRRIVEGETKVSKLGKIKCKDESHVQDVKADDLRQMFLSMTEEVRVIIVKLADRLHNMRTLSHMPPHKQSGIATETLQVFAPLAKLLGIYQIKSELENLAFMYTNAQDYARVQRRIAELHKEHEKELKEAKRILMKKIEEDQFLELVTVMTEIQSICKEPYSIYKAVLKSKSSIKEVNQIAQLR…	At4g02260	XP_004247974.1	1	1	0	0.062	0.000399808	1	0	1	20.2.4	stress.abiotic	Cp	78	3	-	Cp	not Cp	C	66.1	plastid	plastid	-
	Solyc07g041490	-	Stress responsive alpha-beta barrel domain protein (AHRD V1 *-*- C7QRA6_CYAP0); contains Interpro domain(s) IPR013097 Stress responsive alpha-beta barrel	MMQLGVKTSGTAVACSHFLSPRAFPPTAIAITRRHLKPYCLYRSIKMSAEQIVEHVVLFKAKPDADPSKLTAMVNNLNSLTSLNQVVHLSSGPLIRDRSSSFSFTHILHSRYKSKSDLADYSAHPNADHVSVVRQYVLPVVDDIMAVDWVPIEFSGPTGVPPGSAMRLTFLKLKENLGENEKSQVLSAVGGIKEKFSGIEQLTVGENFSPGRAKGFSIASIAVFKGVDELEALESQTELANEQKEKVKEFLDGAVVVDYAVLPTQSASL	At2g31670	XP_010324012.1	8	52	8	11.115	0.0716753	5	3	8	35.1	not assigned.no ontology	M	113	4	-	possibly M	Cp	Cp	97.8	plastid stroma	peroxisome	plastid
	Solyc10g006760	-	Universal stress protein (Usp) (AHRD V1 *--- A2Q2X4_MEDTR); contains Interpro domain(s) IPR006016 UspA	MQKQPPHTADSGMPNLANIKIKCSSPRFPPPTTPSATDTPTAGAQRKIGIAVDLSDESAFAVKWAVHHYLRPGDAVILVHVRPTSVLYGADWGSVDVSIADTDNIETQKKLEDDFDAFTSAKSSDLAQPLVEAQIPYKIHIVKNADHDMKERLCLEVERLGLSAVIMGSRGFGATKRGNDGRLGSVSDYCVRHCVCPVVVVRYPDEKDGGNAARKGGVPVASASKENEEEGEYHDACDGRQGSQPAIGKGSRTDN	At1g11360	XP_004248282.1	1	2	0	0.179	0.00115428	2	0	2	20.2.99	stress.abiotic	Cp	41	3	Cp	-	Cp	C	83.9	-	-	-
	Solyc03g098000	-	UV-induced protein similar to At3g17800; DUF 760 domain	MSPSGIKLYPSISHVKLSNRKVAFGSRKYTAIRASVSPSESGGSAAPIAPLQLESPIGQFLCQILTSHPHLVSAAVDQQLELLKIDRDAEQQKEEPSIAGTDIVLYRRIAEVKANERKKTLEEILYALVVQKFMDANVSLVPAISPSSSEPSGRIDTWPSQDDKLEHLHSAEANEMIQNHLSLILGSRLGDDSAVAQISKLRVGQVYAASIMYGYFLRRVDQRFQLEKSMKVLPPGVDNEDSSIQQVAGEDISGDRSDTSFRSTTQTHPELTSWSAGGVSPGGFGQGIKPSRLRNYVMSFDGETLQRYATIRSREAIGMIEKHTEALFGRPEIVITPQGTIDSSKDELIKISFGGLRRLVLEAVTFGSFLWDVESYVDSRYHFVAN	At3g17800	XP_004235367.1	4	19	4	1.683	0.0108529	5	2	7	35.2	not assigned.unknown	Cp	33	4	Cp	possibly Cp	Cp	M	66.5	plastid	-	-
Metal handling	Solyc04g076050	CUTA	Divalent cation tolerance protein CutA (AHRD V1 *-*- Q3Z664_DEHE1); contains Interpro domain(s) IPR004323 Divalent ion tolerance protein, CutA1	MALIASSNLFRRKLPIVGAFCVLTFGLSNLSVPFTNTGFAHSLPFPPLLRSKLGGERRSTSVSRIRMEASSKIVPSIVVYVTVPNKELGKKLSGSIVKEKLAACVNRVPGVESVYEWQGEIQTDSEELLIIKTRESLLEALtheVKANHEYDVPEVIAMPIVGGSPQYLEWLKNSTRDE	At2g33740	XP_004237976.1	1	9	1	0.931	0.00600357	5	2	7	15.2	metal handling.binding, chelation and storage	S	-	5	Cp	M	Cp	M	47.6	envelope-inner	-	-
	Solyc05g052470	FER	Ferritin (AHRD V1 ***- A7UGG8_SOLTU); contains Interpro domain(s) IPR001519 ferritin, N-terminal	MLLKVAPAFALLNTHEENLSSVISFSSHGSALKNFSAKNGNGLVVCASKGSNSKPLTGVVFEPFEEVKKELMLVPTVPQASLARQKFTDQSEAALNEQINVEYNVSYVYHAMYAYFDRDNVALKGLAKFFKESSEEEREHAEKFMEYQNKRGGKVKLQSILMPLSEFNADHAEKGDALYAMELALSLEKLTNEKLLNLHAVATRNNDVQLADFVENEYLQEQVEAIKkinaseYVAQLrRNAVDKGHGVWHFDQMLLHEAEALA	At3g11050	XP_004239952.1	2	2	1	0.668	0.00430761	1	0	1	15.2	metal handling.binding, chelation and storage	Cp	45	3	Cp	-	Cp	Cp	79.2	plastid stroma	plastid	plastid
	Solyc06g050980	FER	Ferritin (AHRD V1 ***- Q308A9_SOLTU); contains Interpro domain(s) IPR001519 ferritin, N-terminal	MLLKVAPAFALLNTPKSTNGENLLTHKSFSAKSGNGFMVCASKGTNHKPLTGVVFEPFEELKKEFMLVPSLPQASLARQKYCDESEAAINEQINVEYNVSYVYHAMYAYFDRDNVALKGLAKFFKESSAEEREHAEKFMEYQNKRGGKVKLQSMLMPLTEFNADHVEKGDALYAMELALSLEKLTNEKLLNVHAVASRNNDVQLADFVESEFLGEQVEAIKkinaseYVAQLrRNAVGQGHGVWHFDQMLLQEGAAA	At3g11050	XP_010322166.1	2	10	1	0.874	0.00563601	5	3	8	15.2	metal handling.binding, chelation and storage	Cp	40	4	Cp	-	Cp	Cp	97.4	plastid mitochondria	plastid	plastid
Detoxification	Solyc06g009020	GSTF2	Glutathione S-transferase IPR004046 Glutathione S-transferase, C-terminal	MAIKVHGPMMSPAVMRVVATLKEKDLDFELVPVNMQAGNADHKKEPFISLNPFGQVPAFEDGDLKLFESRAITQYIAHTYADKGNQLLPNDPKKMAVMSVWMEVEAQKFDPIGSKLGFEIVIKPMLGMVTDDAVVAENEEKLGKLLDVYESRLKESKYLGGESFTLADLHHAPSLHYLSGSKVKSLFDARPHVSAWVADILARPAWSKTIELSKQ	At2g47730	XP_004240536.1 Islam et al (2017)	1	1	1	0.292	0.00188297	1	0	1	26.9	misc.glutathione S transferases	-	-	4	-	-	Cp	C	98.21	stroma cytosol	plastid	plastid
	Solyc12g094430	GSTF5	Glutathione S-transferase IPR004046 Glutathione S-transferase, C-terminal	MATPVKVYGPTLSTAVSRVLACLLEKNVQFHLIPVNMAKGEHKKPAYLKIQPFGQVPAYQDEDITLFESRSINRYICDKYGSQGNKGLYGTNPLEKASIDQWIEAEGQSFNPPSSVLVFQLAFAPRMKLKQDENLIRQNEEKLKKVLDVYEKRLGDSQYLAGDEFTLADLSHLPNIQYLVNGTDRAELITSRENVGRWWGEISNRESWKKVVEMQTSPPPS	At2g30860	XP_004253135.1 Islam et al (2017)	10	34	10	16.783	0.108225	5	3	8	26.9	misc.glutathione S transferases	S	-	4	-	possibly M	Cp	Cp	53.56	-	cytosol	plastid
	Solyc04g009530	GSTL1	Glutathione S-transferase (AHRD V1 **** B3TLW0_ELAGV); contains Interpro domain(s) IPR004045 Glutathione S-transferase, N-terminal	MAASSIGHQIHINVNSPILLPLRTNFSSLSFTFSNARYPLKWNHIGCPKICALPAVSIIASGSSREMLPPALDSSSEPPAIFDGTPKLYISYSCPYAQRTWIARNCKALQEEIKLVPIDLKNRPDWYKEKVYPANKVPSLEHNNEVKGESMDLIRYIDSNFEGPSLFPDDPSKREFAEELFSYFDSFYKAVISSLKEDKINDAIAAFDSIETALSKFVDGSFFLGSLSLVDIAYAPFIERFQPFLLEVKNYDITTGRTKLAAWIKEMNQIEGYTVTKRDPKEHLENYKrRNAFLSQL	At3g55040	XP_004236818.1 Islam et al (2017)	11	40	11	6.743	0.0434824	5	3	8	26.9	misc.glutathione S transferases	Cp	2	2	Cp	Cp	Cp	Cp	83.4	plastid stroma	plastid	plastid
	Solyc06g083770	GHR2	Glutathione transferase (AHRD V1 **** B6U900_MAIZE); contains Interpro domain(s) IPR004046 Glutathione S-transferase, C-terminal	MYSAQVSSFISIPFPPSKSKTHKLKYPKILHTKLCNSTPKMSLNQNSNTNLINTITKLLWGPSLPPQLLISTVRSTWSATWQLMMSQLAPSDPTGSYTRPTSQFRLYSNPELKFSPKDLHLYVGLPCPWAHRTLIVRALKGLEDSVPVSIASPGIDGSWEFRVFSDPDKDKLVPGLDKANGCKTLREVYKLrRNAGGYSGRSTVPMLWDMGKKEVLCNESYDIIEFFNSGLNEISGNPELDLSPPALKVDIRKWNDIIYPNVNNGVYRCGFAQSQEAYNKAAEGLFRTLEMLENADHLAGSRYLCGDVLTLADVCLFTTLIRFDVVYNVLFKCTKKKLIEFTNLHGYLRDIYQIPKVAETCNMGQIMEGYYKILFPLNPGGINPIMPSGCEDEVLSKPH…	At5g44000	XP_004242372.1 Islam et al (2017)	7	26	7	2.548	0.0164308	5	3	8	26.9	misc.glutathione S transferases	Cp	69	2	Cp	Cp	Cp	Cp	61.7	plastid	plastid	-
Protein Homeostasis G	Solyc02g088610	CLPB3	ATP-dependent chaperone ClpB (AHRD V1 **** B5W0X8_SPIMA); contains Interpro domain(s) IPR017730 Chaperonin ClpB	MSTVTSFSGVQFCVPSSSSNSSNRVALFSSHSAPYLNFSGKSRVLGKCSSLKLKRKDVFFSRKTEKLSQGSRLTVRCDASNGRITQQDFTEMAWQAIVASPEIAKENKHQIVEtheLMKALLEQKNGLARRIFSKTGVDNTRLLEATDKFIRQQPKVignaETAGSMLGRELEGLMQRAREYKKEYGDSFVSVEHLVLGFIQDKRFGKQLFNDFQISLKTLKTAIESIRGRQNVIDQDPEGKYESLEKYGKDLTAMARAGKLDPVignaRDDEIRRCIQILSRRTKNNPVLIGEPGVGKTAISEGLAQRIVQGDVPQALMNRRLISLDMGALIAGAKYRGEFEDRLKAVLKEVTESEGQIILFIDEIHTVVGAGATNGAMDAGNLLKPMLGRGELRCIG…	At5g15450	NP_001234143.2	45	214	43	17.166	0.110695	5	3	8	20.2.1	stress.abiotic	Cp	76	1	Cp	Cp	Cp	Cp	97.9	plastid stroma	plastid	plastid
	Solyc11g020040	HSC70-2	Chaperone DnaK (AHRD V1 ***- Q1SKX2_MEDTR); contains Interpro domain(s) IPR012725 Chaperone DnaK	MASSATHQVKIPFSGHKLDNRTPFSGGRISFASRKKCYSDKAVRQRFRPMKVVNEKVVGIDLGTTNSAVAVMEGGKPTIVTNAEGQRTTPSVVAYTKNGDRLVGQIAKRQSVVNPENTFFSVKRFIGRKMAEVDEESKQVSYRVMKDENGNVKLECPAIGKQFAPEEISAQVLRKLVDDASKFLNDKVAKAVVTVPAYFNDSQRTATKDAGRIAGLDVLRIINEPTAASLAYGFEKKSNETILVFDLGGGTFDVSVLEVGDGVFEVLSTSGDTHLGGDDFDKRIVDWLADTFRKEEGIELLKDKQALQRLTEAAEKAKIELSTLTQTNISLPFITATADGPKHIDTTFTRAKFEELCSDLLDRLKTPVETALKDASLSFKDIDEVVLVGGSTRIPAVQN…	At5g49910	NP_001233780.2	13	97	3	1.865	0.0120265	3	1	4	20.2.1	stress.abiotic	Cp	69	3	Cp	Cp	Cp	C	80.5	plastid stroma	plastid	plastid
	Solyc01g103450	HSC70-2	Chaperone DnaK (AHRD V1 ***- Q1SKX2_MEDTR); contains Interpro domain(s) IPR012725 Chaperone DnaK	MASSTAQIHALGATYFANSSSSTRKPLKSVFLGQKLNNRTLAFGLKQKKSRGNNGGYAPMRVVAEKVVGIDLGTTNSAVAAMEGGKPTIVTNAEGQRTTPSVVAYTKSGDRLVGQIAKRQAVVNPENTFFSVKRFIGRKMNEVDEESKQVSYNVIRDENGNVKLDCPAIGKSFAAEEISAQVLRKLVDDASKFLNDKVSKAVVTVPAYFNDSQRTATKDAGRIAGLEVLRIINEPTAASLAYGFEKKSNETILVFDLGGGTFDVSVLEVGDGVFEVLSTSGDTHLGGDDFDKRIVDWLAASFKRDEGIDLLKDKQALQRLTETAEKAKMELSSLTQTNISLPFITATADGPKHIETTITRGKFEELCSDLLDRLKTPVQNSLRDAKLSFSDIDEVILVG…	At5g49910	XP_004230445.1	41	493	31	58.078	0.374517	5	3	8	20.2.1	stress.abiotic	Cp	63	1	Cp	Cp	Cp	Cp	60	plastid stroma	plastid	plastid
	Solyc03g117590	DJA8 TOC12	Chaperone protein DnaJ (AHRD V1 *-*- C5UZI2_CLOBO); contains Interpro domain(s) IPR001623 Heat shock protein DnaJ, N-terminal	MATMGMTGSIGGYGAASASLFRLRNSAKKKTRNGKNGFRVSCVCSSSAVADPYKTLKIQPGASESEVRKAFRQLALKYHPDVCRGNNCGVQFHQINEAYDVVMSNLRGETRAELEMIEEYDDSNDESMRGMHEPDWDLWEEWMGWEGAGIRDYTSHVNPYI	At1g80920	NP_001233835.1	1	3	1	0.778	0.00501695	3	0	3	20.2.1	stress.abiotic	Cp	45	2	Cp	Cp	Cp	C	90.7	stroma	-	-
	Solyc03g116790	DJA7	Chaperone protein DnaJ (AHRD V1 ***- B6TAJ2_MAIZE); contains Interpro domain(s) IPR012724 Chaperone DnaJ	MNSTAMASTASLSLRPSSLISDRSHSPCLPPSSSSSFFSGGTRLWAHTKFISISFSSSQKIPGrRNAFGRLVVAAAADYYSTLGVPKSANSKDIKAAYrRNALARQYHPDVNKEPNAPEKFKEIKDAYEILSDDKKRALYDQYGEAGVKSSVGAQAGAYTTNPFDLFETFFGPSMGGFGMDGAGFGTrRNARSTVTKGEDLRYDMTLEFSAAIFGAEKDFELSHLETCEVCVGTGAKVGSKMRICSTCGGRGQVMRTEQTPFGMFSQVSVCPNCGGDGEMISEYCRKCSGEGRIRVKKDIKVKIPPGVNKGSILRVAGEGDAGPRGAPPGDLYVYLDIEEIPEIQRDGINLISTVSVGYLDAILGAVVKVKTVDGLTDLQIPPGTQPGDVLVLARKGAP…	At1g80030	XP_004235949.1	5	16	5	0.995	0.00641628	5	2	7	20.2.1	stress.abiotic	Cp	71	1	Cp	Cp	Cp	Cp	98.8	thylakoid	plastid	plastid
	Solyc06g068500	DJA8 TOC12	Chaperone protein DnaJ 1 (AHRD V1 *-*- D8USE3_9MICC); contains Interpro domain(s) IPR001623 Heat shock protein DnaJ, N-terminal	MATAMGMMRNVGGYGSASASWIRLKNRANKKTKRSENVKFGVTCVYSPSLSDPYKTLRIQPDASESDVRKAFRQLALQYHPDVCRGSNCGIQFHQINDAYDTVMSNLRGETKNAEMEIYEEYDDDDEAMRGVNDPDYDMWEEWMGWEGAGIRDYSSHINPYI	At1g80920	XP_004241676.1	1	1	1	0.468	0.00301791	1	0	1	20.2.1	stress.abiotic	M	109	5	Cp	Cp	Cp	C	50.6	stroma	-	-
	Solyc07g055260	DJC77	Chaperone protein dnaj 10 (AHRD V1 *-*- B6TAW2_MAIZE); contains Interpro domain(s) IPR003095 Heat shock protein dnaj	MAQLLSPVCTDSLKLQNTVQCFYTRSKVPILGNNFSSMGVFGKKRGGLGRIKVAYQDSAAASEEIADDFYAVLGLLPDATPAQIKKAYYSCMKACHPDLSGDDPETTNFCMFINEVYEILSDPVQRRVYDEIHGYTATAINPFLSDSSPKNADHVFVDEFSCIGCKNCANVCSKVFGIEEDFGRARVYDQCGHPDLIQQAIDSCPVDCIHWTSAAQLSLLEDEMRRIERVNVALMLSGMGSGAMDVFRMASTRWEKRQSKVLEQAKVRMMKKKNSEKTESYWDNLWGDRKDYTKTEEEVEDRSKRAAAAARKWREYSRRGADKPPTFKLPEAISNDN	At2g42750	NP_001317628.1	1	3	1	0.179	0.00115428	3	1	4	20.2.1	stress.abiotic	-	-	5	Cp	possibly Cp	Cp	C	99.9	-	plastid	-
	Solyc01g105340	DJA6	chaperone protein dnaJ A7A, chloroplastic-like	MLANQKSKAVTYRKLARSYHPDVNKEPGAEQKFKEISYEVLSDDEKRSIYDKYGEAGLKGAGAGMGDFSFDLFESLFDGFGGMGGMGGMGGRGSRSRATEGEDQGYNLVLNFKEAVFGVEKEIEISRLETCGTCDGSGAKPGTKPSTCNTCGGQGQVVSSARTPLGVFQQVTTCSSCGGTGEISTPCGTCNGDGRVRKSKRISLKVPPGVDSGSRLRVRSEGGRRGGPPGDLFVMIEVLPDPVLKRDDTNILYNCKVSYIDAILGTTMKVPTVDGMVDLKIPAGTQPGTTLVMAKKGVPFLSKPNMRGDQLVRVQVEIPKRLSSEERKLIEELANLNKPKAATNSKR	At2g22360	XP_004230549.1	8	36	8	2.981	0.019223	5	1	6	20.2.1	stress.abiotic	M	101	4	-	possibly M	Cp	M	60.03	thylakoid	plastid	-
	Solyc05g010670	HSP90-5	Chaperone protein htpG (AHRD V1 ***- HTPG_MYXXD); contains Interpro domain(s) IPR001404 Heat shock protein Hsp90	MAPVVSRSLTSSPMASVPYSPSFVLGSGSTNRVCLKTTFLPRNNIKNGFLQSGLRWKQDKRDVGVVVRCEASAVAEKEASETSGETHEYQAEVSRLMDLIVHSLYSHKEVFLRELVSNASDALDKLRFLSLTEPSLLGDSSELEIRIKPDPDNGTVTITDTGIGMTKEELIDCLGTIAQSGTSKFLKALKENKDLGADNGLIGQFGVGFYSAFLVAQKVVVSTKSPRSDKQFVWEAEADSSSYVIREETNPENLLTRGTQITLYLRDDDKYEYCEPKKIQDLVKNYSQFVSFPIYTWQEKSRTIEVEEEEEPKEGEEKTEEEKKMTKKTKTEKYFDWELTNETKPIWMRNPKEVEKEQYQEFYKRTFNEFLDPLAHTHFTTEGEVEFRSVLYIPGMAPL…	At2g04030	XP_004239010.1	23	166	23	10.325	0.066581	5	3	8	20.2.1	stress.abiotic	Cp	51	2	Cp	Cp	Cp	C	68	plastid stroma	plastid	plastid
	Solyc09g015360	DJC73	Co-chaperone protein DnaJ (AHRD V1 *-*- A7I1Z6_CAMHC); contains Interpro domain(s) IPR001623 Heat shock protein dnaj, N-terminal	MYFLRWPFTVKGKEQNVKLLIWKACNQQRRMDFASVLSQKPVNNFHFPQNLRELTSRFVCRIEYGSFAIPRRMCFSNSLGSYYWKKRKKYKHILVKASRKESPYEVLGVSSSATADEIKKAYRKLALKYHPDVNKEQNAQEKFMRIKHAYNTLLNSKTRRRYDSRSDTSSYSYYNGAERNRSAADEEDFYSFADFFKDLQEEFRNWEANVASTGKPKSLWEELAEIGEEFVEFLEKELNITDADVEDENNNERPQKGNAQSGTSNEKQMRTDKDNSIEENIDEIEAALAQLKKELGL	At5g59610	XP_004246295.1	4	6	4	1.031	0.00664842	4	2	6	20.2.1	stress.abiotic	-	-	5	Cp	M	not Cp	C	99.9	-	-	-
	Solyc06g076020	HSC70-1	heat shock protein IPR013126 Heat shock protein 70	MAGKGEGPAIGIDLGTTYSCVGVWQHDRVEIIANDQGNRTTPSYVGFTDTERLIGDAAKNQVAMNPINTVFDAKRLIGRRFSDASVQEDMKLWPFKVIPGPGDKPMIVVTYKGEEKEFAAEEISSMVLTKMKEIAEAFLGSTVKVVTVPAYFNDSQRQATKDAGVISGLNVMRIINEPTAAAIAYGLDKKATSAGEKNVLIFDLGGGTFDVSLLTIEEGIFEVKATAGDTHLGGEDFDNRMVNHFVQEFKRKHKKDITGNPRALRRLRTACERAKRTLSSTAQTTIEIDSLYEGVDFYSTITRARFEELNMDLFRKCMEPVEKCLRDAKMDKSTVHDVVLVGGSTRIPKVQQLLQDFFNGKELCKSINPDEAVAYGAAVQAAILSGEGNEKVQDLLLLD…	At5g02500	NP_001234491.2	9	44	1	1.913	0.012336	1	0	1	20.2.1	stress.abiotic	-	-	2	-	-	Cp	C	94.62	-	cytosol	-
A Proteins were identified by acetone preparations and/or the gel method. For emPAI and Mol% calculations, only the data from the acetone prepartions were used. Proteins identified solely by the gel method have data for the number of peptides, PSMs and unique peptides.
B Names of tomato proteins were based on the literature, NCBI annotation (identified in BlastP searches), and/or SolyGenomics descriptor. In a small number of cases, tomato protein names were assigned based on NCBI annotations and the Arabidopsis homolog.
C Some Sol Genomics descriptors were updated when NCBI annotations and Arabidopsis gene annotations were aligned.
D Target P's subcellular locations are: chloroplast (Cp), mitochondria (M), secretory (S), and no predicted location is indicated by a dash (-).
E ChloroP was used to predict the presence of a chloroplast transit peptide (Y) and the lack of a predicted transit peptide is indicated with a dash (-).
F Predotar's predicted subcellular locations were: chloroplast/plastid (Cp),endoplasmic reticulum (ER) or mitochondrion (M). For proteins with localization predictions that were less clear, Predotar provided categorized of possibly Cp, M and ER. Proteins with unresolved locations or that did not have a homolog detected by Predotar are indicated with a dash (-).
G WoLF PSORT's and YLoc's predicted subcellular locations were: chloroplast/plastid (Cp), cytosol (C), cytoskeleton (Cy), endoplasmic reticulum (ER), extracellular (EX), golgi apparatus (G), mitochondrion (M), nucleus (N), peroxisomes (P), plasma membrance (PM), and vacuole (V). Proteins with no chloroplast location in WoLF PSORT are indicated by not Cp.The number of proteins predicted to be in t…
