# Supplementary material for: The tomato chloroplast stromal proteome compendium elucidated by leveraging a plastid protein-localization prediction Atlas
Source: Front Plant Sci. 2023 Aug 28;14:1020275. doi: 10.3389/fpls.2023.1020275 (PMC10493611; doi:10.3389/fpls.2023.1020275)
Supplement: Supplementary file 11 [file Table_9.xlsx]

## Sheet: Table S9A. MEP path-CPTs-TPSs
Table S9A . MEP pathway and prenyltransferases and terpene volatile biosynthesis
Gene and protein descriptors							ProteomicsA								Bin codes		Algorithms								Databases
Category	Tomato Gene ID	Gene nameB	DescriptionC	Protein Sequence	Arabidopis homolog	Tomato proteinB NCBI accession	Peptides	PSMs	Unique Peptides	emPAI	Mol%	Acetone samples	Gel samples	Total	Bincode	Name	TargetP D ver.1	Transit peptide length	TargetP (reliability class)	ChloroP E	Predotar F	WoLF PSORT G	YLoc G	YLoc % Confidence	PPDB	SUBA4	plprot
MEP pathway	Solyc01g067890	DXS1	1-deoxy-D-xylulose 5-phosphate synthase 1 (AHRD V1 ***- C7U110_SOLLC); contains Interpro domain(s) IPR005474 Transketolase, N-terminal IPR005475 Transketolase, central region IPR005477 Deoxyxylulose-5-phosphate synthase	MALCAYAFPGILNRTGVVSDSSKATPLFSGWIHGTDLQFLFQHKLTHEVKKRSRVVQASLSESGEYYTQRPPTPILDTVNYPIHMKNLSLKELKQLADELRSDTIFNVSKTGGHLGSSLGVVELTVALHYVFNAPQDRILWDVGHQSYPHKILTGrRNADKMSTLRQTDGLAGFTKRSESEYDCFGTGHSSTTISAGLGMAVGRDLKGRNNNVIAVignaDGAMTAGQAYEAMNNAGYLDSDMIVILNDNRQVSLPTATLDGPVAPVGALSSALSRLQSNRPLRELREVAKGVTKQIGGPMHELAAKVDEYARGMISGSGSTLFEELGLYYIGPVDGHNIDDLIAILKEVRSTKTTGPVLIHVVTEKGRGYPYAERAADKYHGVAKFDPATGKQFKASA…	At4g15560	NP_001234672.1 Paetzold et al 2010	7	14	7	1.565	0.0100919	5	3	8	16.1.1.1	secondary metabolism.isoprenoids.non-mevalote pathway.DXS	-	-	4	-	-	Cp	Cp	99.6	plastid stroma	plastid	-
	Solyc11g010850	DXS2	1-deoxy-D-xylulose 5-phosphate synthase 2 (AHRD V1 **** C7U111_SOLLC); contains Interpro domain(s) IPR005477 Deoxyxylulose-5-phosphate synthase	MAVSSGTVFRINQHPSSPYMKTPRFYNFTKKKFLVKASVNGSDEINGKIVRKEEKDSLQIDFSGEKPPTPFLDTINYPKHMKNLSKMDLEQLAAELRAEIVYSVAKTGGHLSSSLGVVDLTVALHHVFDTPEDKIIWDVGHQAYAHKILTGRRSKMHTMRKTSGLAPFPKRDESVHDAFGAGHSSTSISAGLGMAVARDLLGNNNHVISVignaDGAMTAGQAYEAMNNAGFLDSNLIVILNDNKQVSLPTATLDGPATPVGALSSALSKLQASLKFRQLREAAKTITKQIGPQAHEVAAKVDEYARGMLSASGSTLFEELGLYYIGPVDGHNIEDLITILEKVKALPAPGPVLIHIVTEKGKGYLPAEAADDKMHGVAQFDPKTGKQFKAKSPTLTYT…	At4g15560	NP_001332799.1 Paetzold et al 2010	1	1	1	0.096	0.000619058	1	0	1	16.1.1.1	secondary metabolism.isoprenoids.non-mevalote pathway.DXS	-	-	5	Cp	possibly Cp	Cp	Cp	99.6	plastid stroma	plastid	-
	Solyc03g114340	DXR	1-deoxy-D-xylulose-5-phosphate reductoisomerase (AHRD V1 **** Q947C3_SOLLC); contains Interpro domain(s) IPR003821 1-deoxy-D-xylulose 5-phosphate reductoisomerase	MALNLLSPAEIKSISFLDNSKSSYNLSHLKFTGGLSIRRKECSGAFAKRVQCSAQPPPPPAWPGRAVAEPGRQSWDGPKPISIVGSTGSIGTQTLDIVAENPDKFRVVALAAGSNVTLLADQVKTFRPKLVAVRNESLVEELKDALADMEDKPEIIPGEQGVIEVARHPDAVTVVTGIVGCAGLKPTVAAIEAGKDIALANKETLIAGGPFVLPLAHKHKVKILPADSEHSAIFQCIQGLPEGALRRIILTASGGAFRDWPVEKLKEVKVADALKHPNWNMGKKITVDSATLFNKGLEVIEAHYLFGAEYDNIEIVIHPQSIIHSMVETQDSSVLAQLGWPDMRLPILYTLSWPDRVYCSEITWPRLDLCKLGSLTFKAPDNVKYPSMDLAYSAGRAGG…	At5g62790	NP_001234553.2 Rodríguez-Concepción et al (2001)	15	90	15	3.924	0.025304	5	3	8	16.1.1.2	secondary metabolism.isoprenoids.non-mevalote pathway.DXR	Cp	51	3	Cp	Cp	Cp	Cp	99.5	plastid stroma	plastid	-
	Solyc01g102820	MCT	2-C-methyl-D-erythritol 4-phosphate cytidylyltransferase (AHRD V1 ***- A9ZN09_HEVBR); contains Interpro domain(s) IPR001228 4-diphosphocytidyl-2C-methyl-D-erythritol synthase	MSTLQLGIILSSSSPMFLASNSHIPKNVLPSISLFPTYFVKNPCrRNATYSHADPrRNAGLFKISCSSTSENLNKESDVVVVEEKSVSVILLAGGKGKRMGASMPKQYLPLLGQPIALYSFYTFSKMPQVKEIIVVCDPSYQDIFEDAKEYIQVDLKFALPGKERQDSVYSGLQEVDSNSKLACIHDSARPLVQIEDVEKVLKDGWLVGAAVLGVPAKATIKEANSESFVVKTLDRKTLWEMQTPQIIKPELLKKGFELVNREGLEVTDDVSIVEHLKHPVYITEGSYTNIKVTTPDDLLLAERILNIEES	At2g02500	XP_010314187.1	12	77	12	7.66	0.0493957	5	3	8	16.1.1.3	secondary metabolism.isoprenoids.non-mevalote pathway.CMS	Cp	61	2	Cp	Cp	Cp	Cp	99.1	plastid stroma	plastid	plastid
	Solyc01g009010	CMK	4-diphosphocytidyl-2-C-methyl-D-erythritol kinase (AHRD V1 ***- A4USB3_NICBE); contains Interpro domain(s) IPR004424 4-diphosphocytidyl-2C-methyl-D-erythritol kinase	MASCNILCSVKPQIDSFKKSCFFQSWSNRPHGSSYFNKNIQFRRNSFVIVKASGSRTSKKQVEITYNPEEKFNKLADEVDREAGLSRLTLFSPCKINVFLRITSKRDDGYHDLASLFHVISLGDKIKFSLSPSKSKDRLSTNVAGVPLDERNLIIKALNLYRKKTGTDNYFWIHLDKKVPTGAGLGGGSSNAATTLWAANQFSGCVATEKELQEWSGEIGSDIPFFFSHGAAYCTGRGEVVQDIPSPIPFDIPMVLIKPQQACSTAEVYKRFQLDLSSKVDPLSLLEKISTSGISQDVCVNDLEPPAFEVLPSLKRLKQRVIAAGRGQYDAVFMSGSGSTIVGVGSPDPPQFVYDDEEYKDVFLSEASFITRPANEWYVEPVSGSTIGDQPEFSTSFDMS	At2g26930	NP_001295301.1 Rohdich et al (2000)	7	22	7	2.728	0.0175916	5	3	8	16.1.1.4	secondary metabolism.isoprenoids.non-mevalote pathway.CMK	Cp	51	2	Cp	possibly Cp	Cp	Cp	100	plastid	plastid	-
	Solyc08g081570	MeCPS MCS	2-C-methyl-D-erythritol 2 4-cyclodiphosphate synthase (AHRD V1 **** A9ZN13_HEVBR); contains Interpro domain(s) IPR003526 2-C-methyl-D-erythritol 2,4-cyclodiphosphate synthase, core	MPLVFEKIGIFPSIYTSSLRFSTKLSSIPVAMASSLFFSTPIPTKLISKQKPFSHHSSNPLLPQSTIKPLRSLVVSSAAAIEAETETSSSNSTPLKSLPFRVGHGFDLHRLEPGYPLIIGGINIPHDRGCEAHSDGDVLLHCVVDAILGALGLPDIGQIFPDTDPKWKGAPSSVFMEEAVRLMHEAGYELGNLDATLILQRPKVSPHKESIRANLCKLLGADPSVVNLKAKTHEKVDSLGENRSIAAHTVVLLMKK	At1g63970	NP_001353707.1	7	36	7	30.623	0.197473	5	3	8	16.1.1.5	secondary metabolism.isoprenoids.non-mevalote pathway.MCS	Cp	82	3	Cp	possibly Cp	Cp	Cp	100	plastid stroma	plastid	-
	Solyc11g069380	HDS	4-hydroxy-3-methylbut-2-en-1-yl diphosphate synthase (AHRD V1 ***- A9ZN14_HEVBR); contains Interpro domain(s) IPR017178 4-hydroxy-3-methylbut-2-en-1-yl diphosphate synthase, atypical	MAAGTVPASFTGLKSNENGLGFAKSMNFIRVSDLQRVKFRRTKFSVIRNANPGQETIELQPASEGSPLLVPRQKYCESIYKTVRRQTCTVMVGNVALGSEHPIRIQTMTTTDTKDVAATVEQVMKIADAGADIVRITVQGRKEADACFEIKNTLVQKNYNIPLVADIHFAPSVALRVAECFDKIRVNPGNFADRRAQFEQLEYTEDDYQKELEHIEEVFTPLVEKCKKYGRAMRIGTNHGSLSDRIMSYYGDSPRGMVESAFEFARICRKLDFHNFVFSMKASNPVVMVQAYRLLVAEMYVQGWDYPLHLGVTEAGEGEDGRMKSAIGIGTLLQDGLGDTIRVSLTEAPEEEIDPCRRLADLGKRAAALQQGVAPFEEKHRRYFDFQRRSGELPAQKEG…	At5g60600	NP_001234648.1 Pulido et al 2012	24	172	24	8.49	0.0547479	5	3	8	16.1.1.6	secondary metabolism.isoprenoids.non-mevalote pathway.HDS	Cp	48	3	Cp	possibly Cp	Cp	Cp	98.2	thylakoid-peripheral-stromal-side; plastid stroma	plastid	plastid
	Solyc01g109300	HDR	4-hydroxy-3-methylbut-2-enyl diphosphate reductase (AHRD V1 ***- A2TGW4_9LAMI); contains Interpro domain(s) IPR003451 LytB protein	MAIPLQFSSISTRTDLSLPETRTFRLPKPFSVIRCSAGEPVPSSSATAESEFDAKVFRKNLTRSANYNRKGFGHKEATLELMNREYTSDIIKKLKENEFEYTWGNVTVKLAESYGFCWGVERAVQIAYEARKQFPTERIWITNEIIHNPTVNKRLEDMDVKNIPLEEGKKNFDVVDKDDVVVLPAFGAAVDEMLVLSDKNVQIVDTTCPWVTKVWNTVEKHKKGEYTSIIHGKYAHEETVATASFAGKYIIVKNMAEATYVCDYILGGKLDGSSSTKEAFMQKFKYAVSEGFDPDVDLVKAGIANQTTMLKGETEDIGKLVERTMMQKYGVENVNNHFVSFNTICDATQERQDAMYKLVEQKLDLMLVignaGWNSSNTSHLQEIAEERGIPSYWIDSE…	At4g34350	NP_001234728.1 Pulido et al 2012	16	89	16	4.843	0.0312302	5	3	8	16.1.1.7	secondary metabolism.isoprenoids.non-mevalote pathway.HDR	Cp	34	2	Cp	Cp	Cp	Cp	95.1	plastid stroma	plastid	-
	Solyc04g056390	ID11	Isopentenyl-diphosphate delta-isomerase (AHRD V1 **** Q84RZ8_9GENT); contains Interpro domain(s) IPR011876 Isopentenyl-diphosphate delta-isomerase, type 1	MSLTTASASLQFLRRFIASPITSHSSLRLPKSSLLPNNTLPVSSLRCRFRCYSAASTTTMADAISDANMDAVQRRLMFEDECILVDENNADHVVGHDTKYNCHLMEKIEAENLLHRAFSVFIFNSKYELLLQQRSATKVTFPLVWTNTCCSHPLYRESELIEENSLGVRNAAQRKLLDELGIPGEDVPVDQFIPLGRILYKAPSDGKWGEHELDYLLFMVREVNMKPNPDEVAEVKYVNREQLKELLRKADAGEEGLKLSPWFRLVVDNFLFKWWNADHLEKGTLKEVIDMKTIHKLT	At3g02780	ACS34993.1 Pankratov et al 2016	6	28	6	1.738	0.0112075	5	3	8	16.1.2.7	secondary metabolism.isoprenoids.mevalote pathway.isopentenyl pyrophosphate:dimethyllallyl pyrophosphate isomerase	Cp	60	3	Cp	-	Cp	Cp	82.4	-	plastid	-
	Solyc05g055760	IDI2	Isopentenyl-diphosphate delta-isomerase IPR011876 Isopentenyl-diphosphate delta-isomerase, type 1	MVDVIADANMDAVQRRLMFDDECILVDVNDKVVGHESKYNCHLMEKIESENLLHRAFSVFLFNSKYELLLQQRSATKVTFPLVWTNTCCSHPLYRESELIEELGVRAQRKLLDELGIPAEDVPVDQFTPLGRMLYKAPSDGKWGEHELDYLLFIVRDVNVHPNPDEVADIKYVNQEQLKELLRKADAGEEGLKLSPWFRLVVDNFLFKWWNADHVEKGTIQEAADMKTIHKLT	At5g16440	NP_001234853.1 Pankratov et al 2016	3	8	1	0.501	0.00323071	3	1	4	16.1.2.7	secondary metabolism.isoprenoids.mevalote pathway.isopentenyl pyrophosphate:dimethyllallyl pyrophosphate isomerase	-	-	1	-	-	Cp	C	91.85	stroma; cytosol	plastid	-
cis-prenyl transferases and terpene biosynthesis	Solyc08g005680	CPT1	Dimethylallylcistransferase (CPT1); Neryl-diphosphate synthase 1	MSSLVLQCWKLSSPSLILQQNTSISMGAFKGIHKLQIPNSPLTVSARGLNKISCSLNLQTEKLCYEDNDNDLDEELMPKHIALIMDGNRRWAKDKGLEVYEGHKHIIPKLKEICDISSKLGIQIITAFAFSTENWKRSKEEEEVDFLLQMFEEIYDEFSRSGVRVSIIGCKSDLPMTLQKCIALTEETTKGNKGLHLVIALNYGGYYDILQATKSIVNKAMNGLLDVEDINKNLFDQELESKCPNPDLLIRTGGEQRVSNFLLWQLAYTEFYFTNTLFPDFGEEDLKEAIMNFQQRHRRFGGHTY	At5g58770	NP_001234633.1 Schilmiller et al (2009) Matsuba et al (2013)	2	2	1	0.334	0.00215381	2	0	2	16.1.2	secondary metabolism.isoprenoids.mevalote pathway	Cp	53	4	Cp	Cp	Cp	V	88	plastid stroma	plastid	-
	Solyc10g085140	CPT5	Dehydrodolichyl diphosphate synthase 2-like	MSSLVLQCWKLSSPSLILQQNTSISMGAFKGIHKLQIPNSPLTVSARGLNKISCSLNLQTEKLCYEDNDNDLDEELMPKHIALIMDGNRRWAKDKGLEVYEGHKHIIPKLKEICDISSKLGIQIITAFAFSTENWKRSKEEEEVDFLLQMFEEIYDEFSRSGVRVSIIGCKSDLPMTLQKCIALTEETTKGNKGLHLVIALNYGGYYDILQATKSIVNKAMNGLLDVEDINKNLFDQELESKCPNPDLLIRTGGEQRVSNFLLWQLAYTEFYFTNTLFPDFGEEDLKEAIMNFQQRHRRFGGHTY	At5g58770	XP_004253464.1	2	5	2	1.683	0.0108529	3	0	3	35.1	not assigned.no ontology	Cp	41	4	Cp	-	NA	C	40.77	plastid stroma	plastid	-
	Solyc06g076920	CPT7	cis-prenyltransferase 7	MLSLGFSLPPPSDNKLIITNNNQYNYRTNLANVCSNNNVNAVGDQLVTLPEGLKHVAVIMDGHRRWAKNKGLTVKQGHRAGGEKIQVLTRLCSQWGVKVLTIFAFSTENWVRLEEEVDFLMKLFLELIGSQEILDEWTRDGRRVSFIGDKSIFSKSLQEALAVMEERTKFNSGLHVIIAINYSGRQDILQATKSIAIKVKNGDLTVKDIDQSLFEQELDTHCTEFSEPDLLIRTSGEKRVSNFMLWQLAYTELYFANKLFPDMEEADFIEALTSFKSRQRRYGGKKI	At5g58770	NP_001307175.1	1	2	1	0.212	0.00136709	2	0	2	35.1	not assigned.no ontology	-	-	4	Cp	-	Cp	C	98.4	plastid stroma	plastid	-
	Solyc04g079960	GGPPS-2	Geranylgeranyl pyrophosphate synthase 2 (AHRD V1 ***- Q1A7S9_SOLLC); contains Interpro domain(s) IPR000092 Polyprenyl synthetase	MRSMNLVDSWGQACLVINQSLPYNSFNGLMKINSKNRKILQQSLSYRTFSSVTVSAIATNEKVVMEKEEFNFKVYVAEKAICVNKALDEAIMVKDPPKIHEAMRYSLLAGGKRVRPMLCLAACELVGGNQGNAMAAACAVEMIHTMSLIHDDLPCMDDDDLRRGKPTNHKVYGEDVAVLAGDALLAFAFEYLATATTGVSPSRILVAVAELAKSVGTEGLVAGQVADLACTGNPNVGLEMLEFIHIHKTAALLEASVVignaAILGGGADEEVDKLRRFAQCIGLLFQVVDDILDVTKSSSELGKTAGKDLAVDKTTYPKLLGLEKAKEFAAELNGEAKQQLAAFDSHKAAPLIALADYIANRQN	At4g36810	NP_001234302.2	5	23	4	1.738	0.0112075	5	3	8	16.1.1.10	secondary metabolism.isoprenoids.non-mevalote pathway.geranylgeranyl pyrophosphate synthase	Cp	63	5	Cp	-	Cp	C	52	plastid stroma	plastid	-
	Solyc02g085700	GGPPS-3	Geranylgeranyl pyrophosphate synthase (AHRD V1 ***- D0FZ25_9ASTE); contains Interpro domain(s) IPR000092 Polyprenyl synthetase	MSLSTTITTWGYTHHPFSDVGNKGRSRFRSPGFMPHLKMKFFTNPSSLSVSALLTKEQESKSKKQAMEFKEYVLEKAVSVNKALESAVSIKEPVMIHESMRYSLLAGGKRIRPMLCIAACELVGGVESTAMPAACAVEMIHTMSLIHDDLPCMDNDDLRRGKPTNHKIYGEDVAVLAGDALLALAFEHIATHTKGVSSDRIVRVignaELAKCIGAEGLVAGQVVDIISEGISDVDLKHLEFIHLHKTAALLEGSVVLGAILGGAPDEDVEKLRKFARCIGLLFQVVDDILDVTKSSQQLGKTAGKDLVADKVTYPKLIGIEKSREFAEELNKEAKAQLVGFDQEKAAPLFALANYIAYREN	At4g36810	NP_001234268.2	9	50	8	3.833	0.0247172	5	3	8	16.1.1.10	secondary metabolism.isoprenoids.non-mevalote pathway.geranylgeranyl pyrophosphate synthase	Cp	65	5	Cp	possibly Cp	Cp	Cp	98.6	plastid stroma	plastid	-
	Solyc09g008920	SSU-II	GGPPS, Geranylgeranyl pyrophosphate synthase, small subunit (AHRD V1 ***- Q0WUL9_ARATH); contains Interpro domain(s) IPR000092 Polyprenyl synthetase	MVFSMVMSFSPSLCLPRSRMVMQKAIQCSSSVSTASESVKFDLKTYWTTLISDINQKLDEAVPVKYPNQIYEAMRYSVLAKGAKRSPPIMCVAACELFGGNRLAAFPTACALEMVHAASLIHDDLPCMDDDTTRRGLPANHTVFGVDMAILAGDALFPLGFQHIVSHTPSDLVPEDRVLRVITEIARAVGSTGMAAGQFLDLEGGPNAVDFVQEKKYGEMGECSAVCGALLAGASDEEIQHMRKYGRAVGVLYRVVDDILEAKKTENKTEGKKKKGKSYVSVYGIEKAVKVAEDLRAQAKRELDGLEKYGDKVMPLYSFLDYAADRGFSIDGQV	At4g38460	NP_001353635.1 Barja et al (2020)	5	19	5	1.929	0.0124392	5	3	8	16.1.1.10	secondary metabolism.isoprenoids.non-mevalote pathway.geranylgeranyl pyrophosphate synthase	Cp	17	5	Cp	possibly Cp	Cp	Cp	62.7	plastid stroma	plastid	-
	Solyc01g105890	MTS1 TPS5	Linalool synthase (NCBI); contains Interpro domain(s) IPR005630 Terpene synthase, metal-binding domain	MVSILSNIGMMVVTFKRPSLFTSLRRRSANNIIITKHSHPISTTRRSGNYKPTMWDFQFIQSLHNPYEGDKYMKRLNKLKKEVKKMMMTVEGSHDEELEKLELIDNLERLGVSYHFKDEIMQIMRSINININIAPPDSLYTTALKFRLLRQHGFHISQDILNDFKDENGNLKQSICKDTKDILNSSKDEHDNLKQSTCNNTKGLLKLYEASFLSIENESFLRNTTKSTLAHLMRYVDQNRCGEEDNMIVELVVHALELPRHWMVPRLETRWYISIYERMSNANPLLLELAKLDFNIVQATHQQDLRILSRWWKNTGLAEKLPFSRDILVENMFWAVGALFEPQHSYFRRLITKVIVFISIIDDIYDVYGTLDELELFTLAIQRWDTKAMEQLPDYMKVC…	At3g25810	NP_001233805.1 Q1XBU5.1 Falara et al (2011)	1	1	1	0.075	0.000483639	1	0	1	16.1.5	secondary metabolism.isoprenoids.terpenoids	Cp	42	4	Cp	possibly Cp	Cp	C	92.8	-	-	-
	Solyc08g005670	PHS1 TPS20	beta-phellandrene synthase (neryl-diphosphate-cyclizing)	MERVEWCSGKTIPSIEEYLYVTSITFCAKLIPLSTQYFLGIKISKDLLESDEICGLWNCSGRVMRILNDLQDSKREQKEVSINLVTLLMKSMSEEEAIMKIKEILEMNRRELLKMVLVQKKGSQLPQLCKDIFWRTSKWAHFTYSQTDGYRIAEEMKNHIDEVFYKPLNH	At1g79460	NP_001234629.1 Falara et al (2011) Schilmiller et al (2009)	4	6	4	1.61	0.0103821	3	0	3	17.6.1.2	hormone metabolism.gibberelin.synthesis-degradation.ent-kaurene synthase	-	-	2	-	-	Cp	C	89.14	-	plastid	-
	Solyc08g005640	TPS21	beta-phellandrene synthase 1 (neryl-diphosphate-cyclizing)-like; Ent-kaurene synthase-like protein 1 IPR005630 Terpene synthase, metal-binding domain	MRIQYIISFVGLYSLLEEFLHFLSGLGFIETYGCAVDNKDQISPLGFEVIFSSMIKFAEKLNLNLPLNLHLVNLVNCKKDSTIKRNDEYMGEGVGELCDWKEIIKLHQRQNGSLFDSPATTAAALIYHQRDQKCYEYLNSILQQHKNWVPTMYPTMIHSLLCLVDTLQNLGVHRHFKSEIKKALDEIYRLWQQKNEEIFSNITHCAMAFRLLRMSNYDVSSDELAEFMDEEHFFTTSGKYTSHVEILELHKASQLAIDQEKDDILDKINNWTRTFMEQKLLNNGFIDRMSKKEVELALRKFYTTYDRAENRRYIKSYEENNFKILKAAYRSPNINNKDLLIFSIHDFDLCQTQHREELQQLKRWFQDCRLDQLGLSEQFISTTYLIGIAVVSEPEFSRL…	At1g79460	XP_025888303.1 Falara et al (2011) Schilmiller et al (2009)	2	3	2	0.15	0.000967278	3	0	3	17.6.1.2	hormone metabolism.gibberelin.synthesis-degradation.ent-kaurene synthase	S	-	1	-	ER	not Cp	C	91.48	-	plastid	-
A Proteins were identified by acetone preparations and/or the gel method. For emPAI and Mol% calculations, only the data from the acetone prepartions were used. Proteins identified solely by the gel method have data for the number of peptides, PSMs and unique peptides.
B Names of tomato proteins were based on the literature, NCBI annotation (identified in BlastP searches), and/or SolyGenomics descriptor. In a small number of cases, tomato protein names were assigned based on NCBI annotations and the Arabidopsis homolog.
C Some Sol Genomics descriptors were updated when NCBI annotations and Arabidopsis gene annotations were aligned.
D Target P's subcellular locations are: chloroplast (Cp), mitochondria (M), secretory (S), and no predicted location is indicated by a dash (-).
E ChloroP was used to predict the presence of a chloroplast transit peptide (Y) and the lack of a predicted transit peptide is indicated with a dash (-).
F Predotar's predicted subcellular locations were: chloroplast/plastid (Cp),endoplasmic reticulum (ER) or mitochondrion (M). For proteins with localization predictions that were less clear, Predotar provided categorized of possibly Cp, M and ER. Proteins with unresolved locations or that did not have a homolog detected by Predotar are indicated with a dash (-).
G WoLF PSORT's and YLoc's predicted subcellular locations were: chloroplast/plastid (Cp), cytosol (C), cytoskeleton (Cy), endoplasmic reticulum (ER), extracellular (EX), golgi apparatus (G), mitochondrion (M), nucleus (N), peroxisomes (P), plasma membrance (PM), and vacuole (V). Proteins with no chloroplast location in WoLF PSORT are indicated by not Cp.The number of proteins predicted to be in t…

## Sheet: Table S9B. Carotenoids
Table S9B. Carotenoids, tocopherols, and plastoquinone
Gene and protein descriptors							ProteomicsA								Bin codes		Algorithms								Databases
Category	Tomato Gene ID	Gene nameB	DescriptionC	Protein Sequence	Arabidopis homolog	Tomato proteinB NCBI accession	Peptides	PSMs	Unique Peptides	emPAI	Mol%	Acetone samples	Gel samples	Total	Bincode	Name	TargetP D ver.1	Transit peptide length	TargetP (reliability class)	ChloroP E	Predotar F	WoLF PSORT G	YLoc G	YLoc % Confidence	PPDB	SUBA4	plprot
Carotenoids, xanthophylls & ABA	Solyc03g123760	PDS	Phytoene desaturase	MPQIGLVSAVNLRVQGSSAYLWSSRSSSLGTESRDGCLQRNSLCFAGSESMGHKLKIRTPHATTrRNALVKDLGPLKVVCIDYPRPELDNTVNYLEAAFLSSTFRASPRPTKPLEIVIAGAGLGGLSTAKYLADAGHKPILLEARDVLGGKVAAWKDDDGDWYETGLHIFFGAYPNIQNLFGELGINDRLQWKEHSMIFAMPSKPGEFSRFDFSEALPAPLNGILAILKNNEMLTWPEKVKFAIGLLPAMLGGQSYVEAQDGISVKDWMRKQGVPDRVTDEVFIAMSKALNFINPDELSMQCILIALNRFLQEKHGSKMAFLDGNPPERLCMPIVEHIESKGGQVRLNSRIKKIELNEDGSVKSFILSDGSAIEGDAFVFAAPVDIFKLLLPEDWKEIP…	At4g14210	NP_001234095.1 D'Andrea et al (2018)	17	93	17	8.211	0.0529488	5	3	8	16.1.4.2	secondary metabolism.isoprenoids.carotenoids.phytoene dehydrogenase	Cp	43	4	Cp	Cp	Cp	Cp	100	plastid	plastid	plastid
	Solyc02g083410	PDS	15-cis-phytoene desaturase (PDS) - Currently this gene is misannotated and is a fusion ofPBL22 and PDS	MPPCLCLPATLPHPSSTLFSTrRNARFPLLKPPYASSNIPVGSTSQPNTTGVIVignaGGLAGLAAAIRLQADNIPFLLLEASDAVGGRVRSDVVDGYTLDRGFQIFITGYPEARKVLDYDSLDLRKFYSGAQVYYGGRFHTVADPLRHFADALQSLTNPIGSVVDKLLIGLTRLKVLTQGDDEILSADEEPTMNLLKKIGFSDAILERFFRPFFGGIFFDRELETTSRLFNFIFKCLALGDNTLPAKGIAAIPEQLAAKLPSNSILFNTRVVSVDSGSDSSTKIRVTLQNGEMLESEFGVILAVEEPEAVKLLAGEKTGEVRQPVRSTVCLYFSADQGKVPVQDPVLLLNGSGKGIVNNMFFATNVAPSYAPAGKALVSVTLVGLYGDVADEDLVDRV…	At3g09580	XP_004232522.1	16	82	16	2.621	0.0169016	5	3	8	16.1.4	secondary metabolism.flavonoids.chalcones	Cp	39	3	Cp	Cp	Cp	Cp	52.1	plastid	plastid	plastid
	Solyc01g097810	ZDS	Zeta-carotene desaturase	MATSSAYLSCPATSATGKKHVFPNGSPGFLVFGGTRLSNRLVTRKSVIRADLDSMVSDMSTNAPKGLFPPEPEHYRGPKLKVAIIGAGLAGMSTAVELLDQGHEVDIYESRTFIGGKVGSFVDrRNAGNHIEMGLHVFFGCYNNLFRLLKKVGAEKNLLVKEHTHTFVNKGGEIGELDFRFPVGAPLHGINAFLSTNQLKIYDKARNAVALALSPVVRALVDPDGALQQIRDLDNVSFSEWFLSKGGTRASIQRMWDPVAYALGFIDCDNMSARCMLTIFALFATKTEASLLRMLKGSPDVYLSGPIKKYIMDKGGRFHLRWGCREVLYETSSDGSMYVSGLAMSKATQKKIVKADAYVAACDVPGIKRLVPQKWRELEFFDNIYKLVGVPVVTVQLRY…	At3g04870	NP_001234383.2 D'Andrea et al (2018)	18	70	18	5.918	0.0381623	5	3	8	16.1.4.3	secondary metabolism.isoprenoids.carotenoids.zeta-carotene desaturase	Cp	49	2	Cp	Cp	Cp	Cp	100	plastid	plastid	plastid
	Solyc10g081650	CRTISO Tangerine	Carotenoid isomerase, chloroplastic	MCTLSFMYPNSLLDGTCKTVALGDSKPRYNKQRSSCFDPLIIGNCTDQQQLCGLSWGVDKAKGRRGGTVSNLKAVVDVDKRVESYGSSDVEGNESGSYDAIVignaSGIGGLVAATQLAVKGAKVLVLEKYVIPGGSSGFYERDGYKFDVGSSVMFGFSDKGNLNLITQALAAVGRKLEVIPDPTTVHFHLPNDLSVRIHREYDDFIEELVSKFPHEKEGIIKFYSECWKIFNSLNSLELKSLEEPIYLFGQFFKKPLECLTLAYYLPQNAGSIARKYIRDPGLLSFIDAECFIVSTVNALQTPMINASMVLCDRHFGGINYPVGGVGEIAKSLAKGLDNADHGSQILYRANVTSIILDNGKAVGVKLSDGRKFYAKTIVSNATRWDTFGKLLKAENLP…	At1g06820	NP_001234095.1 D'Andrea et al (2018)	11	21	11	1.783	0.0114977	4	2	6	16.1.4.8	secondary metabolism.isoprenoids.carotenoids.carotenoid isomerase	-	-	3	-	possibly Cp	Cp	C	89.1	plastid	plastid	-
	Solyc04g040190	LCYB1	Lycopene beta-cyclase 1	MDTLLKTPNNLEFLNPHHGFAVKASTFRSEKHHNFGSRKFCETLGRSVCVKGSSSALLELVPETKKENLDFELPMYDPSKGVVVDLAVVGGGPAGLAVAQQVSEAGLSVCSIDPNPKLIWPNNYGVWVDEFEAMDLLDCLDATWSGAAVYIDDNTAKDLHRPYGRVNRKQLKSKMMQKCIMNGVKFHQAKVIKVIHEESKSMLICNDGITIQATVVLDATGFSRSLVQYDKPYNPGYQVAYGILAEVEEHPFDVNKMVFMDWRDSHLKNNTDLKERNSRIPTFLYAMPFSSNRIFLEETSLVARPGLRIDDIQERMVARLNHLGIKVKSIEEDEHCLIPMGGPLPVLPQRVVGIGGTAGMVHPSTGYMVARTLAAAPVVANAIIQYLGSERSHSGNELS…	At3g10230	NP_001234226.1	5	19	2	0.823	0.00530713	5	3	8	16.1.4.5	secondary metabolism.isoprenoids.carotenoids.lycopene beta cyclase	-	-	4	Cp	Cp	Cp	Cp	99.7	plastid	plastid	-
	Solyc01g102950	LYCB	Lycopene beta/epsilon cyclase protein [At2g32640], manual annotation	MALQLQLQTTVRNGVFQYPSAIRPFGNRKRVSFQAQATPTRTQRIMEGIAVSGEVGGAGGAYSYTALKRLDQLLSKICSASAVVEEPQKVVFSVPGSYKDSEHVGNSEEMFDVIVCGGTLGIFIATALSSKGLRVGVVERNVLKGREQEWNISRKELLELVEVGVLTEDDIEEATAASFNPNRCGFEGKGDIWVQGILNLGVSPVKLVEIVKDRFDSLGGVTFEGYSVSNISVYQDAAVLQLKEGKTLFSRLIIDAMGNFSPIVKQIRCGRKPDGMCLVVGTCCRGFKENSTSDVIFSSATAKEVGQSLVQYFWEAFPAGSGPIDRTTYMFTYVDPQPGSPQLEELLEDYWDLMPKYQGVSFDDLEILRIIFGIFPTYRDSPLPAAFDRILQFGDASGI…	At2g32640	XP_004230408.1	2	4	2	0.245	0.00157989	2	0	2	35.2	not assigned.unknown	M	25	4	Cp	Cp	Cp	M	44.9	thylakoid	plastid	-
	Solyc12g008980	LCYE	Lycopene epsilon cyclase	MECVGAQNVGAMAVFTRPRLKPLVGrRNAVMPRKKQSFWRMSSMKVKCNSSSGSDSCVVDKEDFADEEDYIKAGGSQLVFVQMQQKKDMDQQSKLSDELRQISAGQTVLDLVVignaCGPAGLALAAESAKLGLNVGLVGPDLPFTNNYGVWEDEFKDLGLQACIEHVWRDTIVYLDDDEPILIgranaYGRVSRHFLHEELLKRCVEAGVLYLNSKVDRIVEATNGQSLVECEGDVVIPCRFVTVASGAASGKFLQYELGGPRVSVQTAYGVEVEVDNNPFDPSLMVFMDYRDYVRHDAQSLEAKYPTFLYAMPMSPTRVFFEETCLASKDAMPFDLLKKKLMLRLNTLGVRIKEIYEEEWSYIPVGGSLPNTEQKTLAFGAAASMVHPATGYSVVRS…	At5g57030	NP_001234337.2 D'Andrea et al (2018)	7	35	7	2.548	0.0164308	5	3	8	16.1.4.4	secondary metabolism.isoprenoids.carotenoids.lycopene epsilon cyclase	Cp	45	5	Cp	Cp	Cp	Cp	100	plastid	plastid	-
	Solyc04g051190	CYP97A29	Carotenoid hydrolase; Cytochrome P450 97A29; Lutein deficient-5	MASSLPLFQFPTHHYSKSRLTLSPKFKGSVSNFTIRCSNSNGKQPESVDEGVKKVEKLLDEKrRNAAELSARIASGEFTVEQSGFPSLLKNGLSKLGVPKEFLEFFSrRNATGNYPRIPEAKGSISAIRDEPFFMPLYELYLTYGGIFRLIFGPKSFLIVSDPSIAKHILKDNSKAYSKGILAEILDFVMGKGLIPADGEIWRVrRNARAIVPALHQKYVAAMIGLFGKATDRLCKKLDVAATDGEDVEMESLFSRLTLDIIGKAVFNYDFDSLTVDTGIVEAVYTVLREAEDRSVAPIPVWELPIWKDISPKLKKVNAALKLINDTLDDLIAICKRMVDEEELQFHEEYMNEKDPSILHFLLASGDEVSSKQLRDDLMTMLIAGHETSAAVLTWTFYL…	At1g31800	NP_001234049.1 D'Andrea et al (2018)	8	17	8	0.778	0.00501695	5	3	8	16.1.4.7	secondary metabolism.isoprenoids.carotenoids.carotenoid epsilon ring hydroxylase	Cp	36	3	Cp	Cp	Cp	Cp	76.9	plastid	plastid	-
	Solyc10g083790	CYP97C11	Cytochrome P450 carontenoid hydrolase	MPVSVTISSFSLLTDTHHRTTVIRPKNPLQNRSQLTIKSSIDNKKPPSTKPTSWVSPDWLTKLTRSLTLGQNDDSNIPIASAELDDVSELLGGALFLPLYRWMNLYGPIYRLAAGPRNFVIVSDPAIAKHVLKNYGKYGKGLVAEVSEFLFGSGFAIAEGPLWTArRNARAVVPSLHKKYLSVIVDRVFCRCAERMVEKLLPDAISGSAVNMEAKFSQLTLDVignaLALFNYNFDSLTTDSPVIDAVYTALKEAELRSTDLLPYWQIKALCKFIPRQIKAENAVSLIRQTVEELIAKCREIVETEGERINEDEYVNDRDPSILRFLLASREEVSSLQLRDDLLSMLVAGHETTGSVLTWTAYLLSKDPSSLEKAHEEVDRVLGGRSPTYEDMKNLKFL…	At3g53130	NP_001234058.2 D'Andrea et al (2018)	14	30	14	2.162	0.0139417	5	3	8	16.1.4.7	secondary metabolism.isoprenoids.carotenoids.carotenoid epsilon ring hydroxylase	Cp	38	3	Cp	Cp	Cp	Cp	91.3	plastid	plastid	plastid
	Solyc05g016330	CYP97B3	Cytochrome P450 carotenoid hydrolase	MATGFCSSITCLVLNrRNASDSIFRHFPSSYPTSWSTQKRSSIRTMKCRCQSTGTDEPKTKMNLFDNASNLLTNLLSGGRIGSMPIAEGAVTDLFDRPLFFSLYDWFLKYGSVYKLAFGPKAFVVVSDPIVARHILRENAFSYDKGVLAEILEPIMGKGLIPADLDTWKQrRNARVIAPGFHSSYLEAMAKVFTECADRTMLKFDKLIEQEESGGGKLIELDLETEFSNLALDIIGLGVFNYDFGSITKESPVIKAVYGTLFEAEHRSTFYIPYWNIPLARWIVPRQRKFQSDLKVINDCLDGLIKNAKETRQETDVEKLQQRDYLNLKDASLLRFLVDMRGVDVDDRQLRDDLMTMLIAGHETTAAVLTWAVFLLAQHPVKMKKAQSEIDAVLGQGRT…	At4g15110	XP_004239253.1 D'Andrea et al (2018)	14	57	14	2.765	0.0178302	5	3	8	26.1	misc.cytochrome P450	Cp	47	2	Cp	Cp	Cp	Cp	95.3	plastid	plastid	plastid
	Solyc04g050930	VDE1	Violaxanthin de-epoxidase	MALAPHSNILCNHEAIKCQVGSRLQSHTRFSWGRADYFGSIVLVKICSRRQIPTYLQKSSRICCGLDSRSLQLSSRGKQNLSSAHRINQNVPKGNTIWKFPEDVALMVLKKWGQLAKTAIVTIFILSVASKADAVDALKTCTCLLKECRIELAKCISNPACAANVACLQTCNNRPDETECQIKCGDLFENSVVDEFNECAVSRKKCVPRKSDVGDFPVPDPSVLVQKFDMNDFIGKWYITRGLNPTFDVFDCQLHEFHTEGNKLVGSLTWRIGTPDGGFFTRSAVQKFVQDPKYPGILYNHDNEYLHYQDDWYILSSKVENSPDDYIFVYYKGRNDAWDGYGGSVLYTRSSVLPETIIPELQIAAQKVGRDFNTFIKTDNTCGPEPPLVERLEKKVEEG…	At1g08550	NP_001234610.2	17	98	17	5.579	0.0359763	5	3	8	16.1.4.21	secondary metabolism.isoprenoids.carotenoids.violaxanthin de-epoxidase	Cp	63	4	-	Cp	Cp	C	83	thylakoid-peripheral-lumenal-side	plastid	plastid
	Solyc04g051610	VDE1-like	Violaxanthin de-epoxidase-related protein (AHRD V1 ***- A8J136_CHLRE)	MMLNVALSSSTINSPATFPINGRFSVAGFPNDFVLHSRKIMFPYFLWRKITGGGRIVGAVEMDKAEEKRGPVRIVGIVGEGSVSPLKSTPWLDVMLHTAERLKWVDEEFEMIVFSDNFVKSEDETANHVSNELNADHADILVVVAVTKEGSVNWIQSNSLNVPNIICFDSSMELRNKLGGSFVETKKRGDIFSSLLPFSQSKKLDESVEITRTVFDAWERHNSDDIRFCLLVIIYITPVSTLKNLRAKGFSTLNCMVTNCGPQILNCLLDPNCRKALQCLNNCSPVDQVCNYRCIASYESKYLEEFSLCVLQKNNCLELDSFEGRNCLLKLLKTSLLVG	At2g21860	XP_004237473.1	1	1	1	0.166	0.00107045	1	0	1	16.1.4.21	secondary metabolism.isoprenoids.carotenoids.violaxanthin de-epoxidase	-	-	5	Cp	Cp	Cp	Cp	89.6	plastid	plastid	-
	Solyc02g090890	ZEP ABA1	Zeaxanthin epoxidase, chloroplastic	MYSTVFYTSVHPSTSVLSRKQLPLLISKDFSAELYHSLPCRSLENGHINKVKGVKVKATIAEAPVTPTEKTDSGANGDLKVPQKKLKVLVAGGGIGGLVFALAAKKRGFDVLVFERDLSAIRGEGQYRGPIQIQSNALAALEAIDLDVAEDIMNAGCITGQRINGLVDGISGNWYCKFDTFTPAVERGLPVTRVISRMTLQQILARAVGEEIIMNESNVVDFEDDGEKVTVVLENGQRFTGDLLVGADGIRSKVRTNLFGPSEATYSGYTCYTGIADFVPADIDTVGYRVFLGHKQYFVSSDVGGGKMQWYAFYNEPAGGADAPNGKKERLLKIFGGWCDNVIDLLVATDEDAILRRDIYDRPPTFSWGRGRVTLLGDSVHAMQPNLGQGGCMAIEDSY…	At5g67030	XP_001296233.1	23	170	23	12.219	0.0787944	5	3	8	17.1.1.1.1	hormone metabolism.abscisic acid.synthesis-degradation.synthesis.zeaxanthin epoxidase	Cp	13	5	-	Cp	Cp	M	68.3	thylakoid-peripheral-stromal-side stroma	plastid	plastid
	Solyc05g010180	-	Putative carotenoid isomerase 1 (AHRD V1 ***- B6SVW5_MAIZE); contains Interpro domain(s) IPR006076 FAD dependent oxidoreductase	MALRLLPFSPFFNFSSSNRKrRNAFSMRSEVSTSATLPSKQSVSGEPEADIVVignaSGIGGLCCAGLLARYGQDVLVLESHDVAGGAAHSFDVKGYKFDSGPSLFSGFQSRGPQANPLAQVLDALGESIPCVNYDSWMVYVPEGEFLSRIGPTEFFKDLEKYAGPDSVREWRKLLDAILPISAAAMALPPLSIRGDLGVLSTAAARYAPSLLKSFAQMGPQGALGATKLLRPFSDIIDSLGIKDPFIRNWLDLLAFLLAGVKTNGILSAEMVYMFSEWYKPGCTLEYPLHGSGAIVEALVRGLQKFGGRISLKSHVENIVVEKgranaVGVKLRGGQFVRARKAVVSNASMWDTLSLLPPEAVPKSYQDGIKTTQQCESFMHLHLGFDAEGISDDLGI…	At1g57770	XP_004238986.1	8	29	8	2.594	0.0167275	5	3	8	16.1.4	secondary metabolism.isoprenoids.carotenoids	Cp	42	3	Cp	Cp	Cp	Cp	56.5	stroma	plastid	-
	Solyc08g008630	-	beta-carotene isomerase D27, chloroplastic (AHRD V1 ***- Q014B2_OSTTA) [PREDICTED: beta-carotene isomerase D27, chloroplastic]	MVLLSIPYSFPSFNNYISQRRSQSQSQRRYVKIGIRCGIAEPSGEPAPLGQKTKYNDGLFEKAFMTLFARKMENFGANKKESDQKKKGFFDYDYDSFVDVSRKVMQGRSRLQQQQVVRQVLMSMLPPGAPAQFRKLFPPTQWAAEFNAAITVPFFFWLVGPSEVVEVEVDGVKQKSGVHIKKCRYLENSGCVGMCVNMCKIPTQDFFTNEFGLPLTMNPNFEDMSCEMIYGQVPPPFEEDPVSKQPCYANICTIANPSSNVCPKLSAN	At1g64680	XP_004244658.1	5	22	5	2.981	0.019223	5	3	8	35.2	not assigned.unknown	Cp	36	3	-	possibly M	Cp	Cp	93.6	plastid	plastid	-
Tocopherol & Plastoquinone	Solyc08g068570	VTE1	Tocopherol cyclase (AHRD V1 **** Q6E6T1_SOLTU)	MECVSAISPISKNGGFCRIRTHFATSIANGEVLLNNYSSAVLKLQSQKSRHAFVVKADSAVDTTKKENREPVKPVYSSTPSNRPLRTPHSGYHFDGSTRKFFEGWFFKVSIPECRQSFCFMYSVESPSFTKKLSSLEELQYGPRFTGVGAQILGADDKYICQYSEESSNFWGSRHELMLGNTFVAQNSAKPPNKEVSPQEFNRCVTEGFQVTPLWHQGSIRDDGRTDYTEIVKTASWEYSTRPIYGWGDVNSKQKSTAGWPAAFPVFEPHWQVCMAAGLSTGWIEWDGQRFEFQNAPSYSEKNWGGSFPRKWFWVQCSVFEGAIGDVALTAGGGLRLLPGLNETFESVALIGIHYRGIFYEFVPWNASVSWEITPWGKWHISAENETHMVLLEATAEDP…	At4g32770	XP_004245276.1	3	14	3	0.778	0.00501695	5	0	5	16.1.3.4	secondary metabolism.flavonoids.chalcones	Cp	56	5	-	possibly Cp	Cp	Cp	95.3	plastoglobules	plastid	plastid
	Solyc03g005230	VTE3	2-methyl-6-phytyl-1,4-hydroquinone methyltransferase, chloroplastic	MASSILSGSDNFKLLSGISPSGSSFLGSELNLKCLPQKGFVNLRATRTLRPTKCSLSASRPASQPRFIQHKKEAFWFYRFLSIVYNADHVINPGHWTEDMRDEALEPAELHARNLQVVDVGGGTGFTTLGIVKHVDAKNVTIIDQSPHQLAKARQKEPLKECKILEGDAEDLPFPTDTFDRYISAGSIEYWPDPQRGIKEAYRVLTIGGVACLIGPVYPTFWLSRFFADVWMLFPKEEEYIEWFKKAGFTQVKLKRIGPKWYRGVrRNAHGLIMGCSVTGVKPYAGESPLQLGPKVEDVSKPVNPFVFLMRFLLGIMAASYYVLVPIYMWIKDQIVPKGQPI	At3g63410	XP_010317394.1	4	11	3	0.931	0.00600357	5	0	5	16.1.3.3	secondary metabolism.flavonoids.chalcones	Cp	57	1	Cp	Cp	Cp	Cp	100	envelope-inner-integral	plastid	plastid
	Solyc08g076360	VTE4	Gamma-tocopherol methyltransferase (AHRD V1 **** Q1PBH9_SOLLC); contains Interpro domain(s) IPR013216 Methyltransferase type 11	MGSQCYSAYSIQSLNPTCPSSSSSSVIFTLLKPQIHrRNARIITCCNSSrRNArRNARMASVAAMNAVSSSSVEVGIQNQQELKKGIADLYDESSGIWEDIWGNADHMHHGYYEPKSSVELSNADHRAAQIRMIEQALSFAAISEDPAKKPTSIVDVGCGIGGSSRYLAKKYGATAKGITLSPVQAERAQALADAQGLGDKVSFQVADALNQPFPDGQFDLVWSMESGEHMPNKEKFVGELARVAAPGGTIILVTWCHRDLSPSEESLTPEEKELLNKICKAFYLPAWCSTADYVKLLQSNSLQDIKAEDWSENVAPFWPAVIKSALTWKGFTSVLRSGWKTIKAALAMPLMIEGYKKGLIKFAIITCRKPEYQLLLSY	At1g64970	NP_001233814.1	4	9	4	0.668	0.00430761	5	3	8	16.1.3.5	secondary metabolism.flavonoids.chalcones	Cp	57	1	Cp	Cp	Cp	Cp	99.9	envelope	plastid	-
	Solyc03g115980	GGR CHLP	Geranylgeranyl reductase (AHRD V1 ***- Q1ZYL0_OLEEU); contains Interpro domain(s) IPR011774 Geranylgeranyl reductase, plants and cyanobacteria	MASIALKTFIGLRQSSPENNSIKISKSLPTNHTHrRNALRINASKSSPRVTGRNLRVAVignaGGPAGGAAAETLAKGGIETFLIERKMDNCKPCGGAIPLCMVGEFDLPLDIIDRKVTKMKMISPSNVAVDIGQTLKPHEYIGMVrRNAEVLDAYLRDRAAEAGASVLNGLFLRMDMPKAPNSPYVLHYTSYDSKTNGAGEKCTLEVDAVignaADGANSRVAKSINAGDYEYAIAFQERIRISDDKMKYYENLAEMYVGDDVSPDFYGWVFPKCNADHVAVGTGTVTHKADIKKFQLATRLRADSKITGGKIIRVEAHPIPEHPRPrRNALQDRVALVGDAAGYVTKCSGEGIYFAAKSGRMCAEAIVEGSENGKRMVDESDLRKYLEKWDKTYWPT…	At1g74470	XP_004235993.1	11	38	9	2.631	0.0169661	5	3	8	16.1.1	secondary metabolism.flavonoids.chalcones	Cp	40	2	Cp	Cp	Cp	Cp	99.8	thylakoid	plastid	-
	Solyc07g061990	SDS	Solanesyl diphosphate synthase (AHRD V1 ***- Q09IV6_SOLLC); contains Interpro domain(s) IPR014120 Solanesyl diphosphate synthase	MMSVTCHNLEIGRTPLESLACGCSFSKGVLRNVSRRFSGKKLLSCRQEFGRISTKASLTGLAPVLDLNKSEKPISLTNVFEVVADDLLTLNKNLHNIVGAENPVLMSAAEQIFGAGGKRVRPALVFLVSRATAEMSGLKELTTNHRRLAEIIEMIHTASLIHDDVLDESDTRRGKETIHQLYGTRVAVLAGDFMFAQSSWYLANLENLEVIKLISQVIKDFASGEIKQASNLFDCDVGLDEYLLKSYYKTASLIAASTKGAAIFSEVGSDISEQMFQYGRNLGLSFQIVDDILDFTQSAAQLGKPAGSDLAKGNLTAPVLFALEKEPNLRNIIESEFHDAGSLEEAINLVKSCGGIQRAQDLAKEKADLAMQNLKCLPSSPFQAALEEIVKYNLERIE	At1g78510	NP_001307204.1 Jones et al 2013	10	44	10	7.577	0.0488604	5	3	8	16.1.2.8	secondary metabolism.isoprenoids.mevalote pathway.geranyl diphosphate synthase	Cp	44	4	-	possibly Cp	Cp	C	96	plastid stroma	plastid	-
	Solyc08g074560	ABC1K1	Uncharacterized aarF domain-containing protein kinase 1 (AHRD V1 *--- ADCK1_CHICK); contains Interpro domain(s) IPR004147 ABC-1; Vitamin E	MEGICTSCLYSSITPLSIEYRNRRKLLNTVRKNRSLSTRICAASSVSTVQTPSEKTALLVKDISRTSALEQLDIERGVCIPFRKYSPESVRNKVLESRGQIFSLVGRGIEIVWSLGLYWTTLVYDYLVGRDEEVVPFRARQLRKLLCDLGPSFIKAGQVLANRPDIIREDYMNELCILQDDVPAFPNQVAFNIIEEELGQPLEAVFSKISSETIAAASLGQVYRATLRASGEEVAIKVLRPQIEPIIYRDLFLFRTLASFLNGISLQKLGCELIVDEFGEKLLEELDYTLEARNIEDFLENFKDDPTVKIPRVYRQLSGSRVLVMEWIDGIRCTDPQAIRDEGIDIDGFLTVGVSAALRQLLEFGLFHGNDPHPGNIFAMRDGRIAYVDFGNVAVLSQQ…	At4g31390	NP_001305094.1	1	1	1	0.061	0.00039336	1	2	3	34.16	transport.ABC transporters and multidrug resistance systems	Cp	41	2	Cp	Cp	Cp	C	57.8	plastoglobules	plastid	-
	Solyc04g083010	ABC1K3	ABC1-like kinase 3	MSSSVASFTANHHVMLPSCADAVRLSGANSSGGRRVKLRLNLPRAAQVEARPQLVPAIRDVAGNSNVTGRTLQVGPSSRDRADDMQSEARAMTRAVDASVYSPDMLSSKYGTRPIKVLRRALQIFNGLGSFALKVWLDQLNGELDRKMRLRAIELRQTFTRLGPTFVKIGQGLSTRPDLCPPEYLEELSELQDALPTFPDAQAFSCIERELGRPLETIYSSISPSPIAAASLGQVYKAQLKYSGQVVAVKVQRPGIEEAIGLDFYLIRGVGILINKYVDIISSDIVALIDEFARRVYQELNYVQEGQNARRFKKLYADKEDVLVPDIFWDYTSGKVLTMEWVEGVKLNEQEAIERQGLKVLDLVNTGIQCSLRQLLEYGYFHANDPHPGNLLATPEGKL…	At1g79600	NP_001311447.1	2	3	2	0.16	0.00103176	3	0	3	34.16	transport.ABC transporters and multidrug resistance systems	Cp	44	2	-	possibly Cp	Cp	Cp	99.5	plastoglobules	plastid	-
A Proteins were identified by acetone preparations and/or the gel method. For emPAI and Mol% calculations, only the data from the acetone prepartions were used. Proteins identified solely by the gel method have data for the number of peptides, PSMs and unique peptides.
B Names of tomato proteins were based on the literature, NCBI annotation (identified in BlastP searches), and/or SolyGenomics descriptor. In a small number of cases, tomato protein names were assigned based on NCBI annotations and the Arabidopsis homolog.
C Some Sol Genomics descriptors were updated when NCBI annotations and Arabidopsis gene annotations were aligned.
D Target P's subcellular locations are: chloroplast (Cp), mitochondria (M), secretory (S), and no predicted location is indicated by a dash (-).
E ChloroP was used to predict the presence of a chloroplast transit peptide (Y) and the lack of a predicted transit peptide is indicated with a dash (-).
F Predotar's predicted subcellular locations were: chloroplast/plastid (Cp),endoplasmic reticulum (ER) or mitochondrion (M). For proteins with localization predictions that were less clear, Predotar provided categorized of possibly Cp, M and ER. Proteins with unresolved locations or that did not have a homolog detected by Predotar are indicated with a dash (-).
G WoLF PSORT's and YLoc's predicted subcellular locations were: chloroplast/plastid (Cp), cytosol (C), cytoskeleton (Cy), endoplasmic reticulum (ER), extracellular (EX), golgi apparatus (G), mitochondrion (M), nucleus (N), peroxisomes (P), plasma membrance (PM), and vacuole (V). Proteins with no chloroplast location in WoLF PSORT are indicated by not Cp.The number of proteins predicted to be in t…

## Sheet: Table S9C. Tetrapyrrole
Table S9C. Tetrapyrroles and singlet oxygen perception
Gene and protein descriptors							ProteomicsA								Bin codes		Algorithms								Databases
Category	Tomato Gene ID	Gene nameB	DescriptionC	Protein Sequence	Arabidopis homolog	Tomato proteinB NCBI accession	Peptides	PSMs	Unique Peptides	emPAI	Mol%	Acetone samples	Gel samples	Total	Bincode	Name	TargetP D ver.1	Transit peptide length	TargetP (reliability class)	ChloroP E	Predotar F	WoLF PSORT G	YLoc G	YLoc % Confidence	PPDB	SUBA4	plprot
Perception signals from the tetrapyrrole pathway	Solyc01g105990	EX1	Executer 1	MASITPPPTFDVNTHKFNFSNPKFTSRLKRSSSSFTLSTSHLLSRVSGSAFCCRCRNGTGDGETVEPSPSVSSQNSSSSSSSWRWDLAFQDAVKNAMKKLDDYVNWSKGVGLDERKSEIGVDDQEWDWERWKKHFSEVEEEERLVSVLKAQLAHAISREDYEDAARLKVAIAAAATKDIVGRVMSHVNKALEEERYRDAAFMRDCAGTGLVGWWAGTSQDVSDPYGRIIRISAEHGRYVARSYSPRQLASTVEGAPLFEIFLTVDNKGEYRQQAVYLKRKPVQQDLPISSSKLPGASSNLDTVGPTENKSDMFDKISDAEEDGEDREDDFGFQNALKDMIPGVQVKVLKVTAPGKVDRDLISKVIEQIMDEEDEDEEKDYDLDSVDDEDEIKVERDGEQ…	At4g33630	XP_004230540.1	2	2	2	0.122	0.000786719	2	0	2	35.2	not assigned.unknown	Cp	54	1	Cp	Cp	Cp	N	37.9	thylakoid	-	-
	Solyc06g071430	EX2	Executer 2	MAMANAWAAAGHVTVRPSLSSSSPSSTYFVNFPNKSFLKNPKNSRLCCRCVTVNNTATPSADENCNNTCFASSSSSSTSLDWDWNRWTRYFSEIEQVESYASVLKFQLEEAIEKEDFEEAAKLKASIAEATSKDSVAEIMSMLKNAIDEERYHDASRLCRSTGSGLVGWWVGYSKDSDDPFGRLIRITPGVGRFIGRSFTPKQLVKASPGTPLFEIFVVKDGNNTYNMQVVLLQRAKGSAASSSPSSKLKPMKGPSSAEIENRAVIDVKVDEAEAEAEKSNEKSIDFEGAAEEGIRSVINFLKDKIPDLKVKVMKVNITEEMTDDGDSVKQFLEEEDDNTISSEETDETTTDLDNMNSDRVTVGGDSGTSEEGKTVDTKLFVGGVLHNKEDNPLKDEFV…	At1g27510	XP_004241496.1	10	17	10	0.968	0.00624217	5	2	7	35.2	not assigned.unknown	Cp	49	1	Cp	Cp	Cp	Cp	97.6	thylakoid	-	-
	Solyc06g008160	FLU1	Fluorescent in Blue light 1, chloroplastic-like isoform 1 [NBCI] Chloroplast FLU-like protein (Fragment) (AHRD V1 *--- D2K2R8_PICAB); contains Interpro domain(s) IPR011990 Tetratricopeptide-like helical	MAIMMKQGLLWSPCPHSISPKIQSFKQPIFQLTNKWRKEGEAMLINSVTQEKSKKKGIAIDFKFRNSAATIIVANALMMTSPLDALAETCEVDNSPFNMLFNMPILLLVALIGATVGGLVARQRKAELQRLNEQLRQINAALRRQAKIESYAPNLSYAPAGGRVAETEVIVDPRKEELISRLKNGKKFLRNQAPDKAQLEFKAALDLAQNLKEPLREKKAARGLGASLQRQGNYREAIKYHSLVLELSARYGEDSGSTEAYGAIADCYTELGDLEQAAKYYDQYIARLETD	At3g14110	NP_001332946.1	4	6	4	0.778	0.00501695	5	1	6	19.4	tetrapyrrole synthesis.regulation	-	-	3	-	possibly M	Cp	C	42.4	thylakoid envelope-inner	plastid	plastid
	Solyc09g072880	FLU2	Fluorescent in Blue light 2 , chloroplastic-like isoform 1 [NBCI] IPR011990 Tetratricopeptide-like helical	MMMKQQWLLSQSQFLYDPFKSGHVKCIFLESGQFSSKWGKALPQKLFYRHTKKGARCIHIDFEDILQFRHPAAALIVTLMMTTPLDALAQTCEADTSVSNMPLLLLVALVGATVGGLLARQRKAELQRLNEQLRQINTALRRQANIESYAPTLSYAPVGGKISVSEVIIDPKKEELISHLKSGKNFLRNQALEKAFLEFKTALKLAQDLKDPIEEKKAARGLGASLQRQGKYKEAIEYHSMVLDISGRNGEESGSTEAYGAIADCYTELGDIERAAKYYDKYIARLQSD	At3g14110	XP_004240478.1	1	1	1	0.194	0.00125101	1	0	1	19.4	tetrapyrrole synthesis.regulation	-	-	4	-	-	Cp	Cp	94.04	thylakoid envelope-inner	plastid	plastid
	Solyc02g068050	SAFE1	SAFEGUARD1, RbcL methyltransferase family protein	MDLVYSSMAKCISAPFPSFTHRPLALFSRVSISPKYANArRNALWKMCSASSSDTLVDNGPVKEGSKSLEVASKKEGEYGDLKSWMHENGLPPCKVVIKDRPSHDAKHLPIHYVAASEDLQAGDIAFAVPDSLVVTLERVLGNETIAELLTTNKLSELACLALYLMYEKKQGKKSFWYPYIRELDRQRARGQLAVESPLLWSDAELDYLTGSPTKADVLERAEGIKREYNELDTVWFMAGSLFQQYPYEIPTEAFPFEIFKQAFVAVQSCVVHLQKVSLArRNAFALVPLGPPLLSYCSNCKAMLAAVDGAVQLVVDRSYSAGDPIVVWCGPQPNSKLLINYGFVDEENSHDRLMVEAALNTEDPQYQDKRLAAQRNGKLSVQAFQVCVGKEREAVLEM…	At5g14260	XP_010317061.1 Wang et al (2020)	5	21	5	1.783	0.0114977	5	2	7	27.3.69	RNA.regulation of transcription.SET-domain transcriptiol regulator family	Cp	45	3	Cp	Cp	Cp	Cp	98.5	plastid stroma	plastid	-
Chlorophyll biosynthesis	Solyc04g076870	HEMA	Glutamyl-tRNA reductase (AHRD V1 **** A5BZY3_VITVI); contains Interpro domain(s) IPR000343 tetrapyrrole biosynthesis, glutamyl-tRNA reductase	MAIPTAFSGPKLESLSSSAAAASPAsignalFCNPGRVrRNALSIQKGLFNSGIRCEVAASDVVDQSQSSGNVTSSSSLSALEQLKSSAADRYTKERSSIVVignaLSIHTTPVEVREKLAIPEAEWPRAIGELCNLNHIEEAAVLSTCNRMEIYVVALSQHRGVKEVTEWMSKTSGVPVTEICKHRFLLYNNDATQHIFEVSAGLDSLVLGEGQILAQVKQVVKVGQGVTGFGRNISGLFKHAITVGKRVRTETNIAAGAVSVSSAAVELALMKLPESCHTTARMLVignaAGKMGKLVIKHLVAKGCTTMVVVNRSEDRVSAIREEMKDVEIIYKPLNEMLKCAAKADVIFTSTASETPLFMKEHVVDLPPVSASVGSLRLFIDISVPRNVGACVNE…	At1g58290	XP_004238036.1	2	2	2	0.245	0.00157989	1	1	2	19.2	tetrapyrrole synthesis.glu-tRNA reductase	Cp	51	2	Cp	Cp	Cp	Cp	100	plastid stroma	plastid	-
	Solyc03g123880	GLUTRBP	Glutamyl-tRNA reductase-binding protein	MASHLPSSSLCVWSDVRFLKRKVNLRPIVRNSHGKPFPAEVSRTILELSSVGTLSTPTQDGWPLGIAVPFAVDPHGTPLLFLNHSTSNFALNSKSSFLVQLQQYGLRTPQCTIQGTLQKPTALKMLHSLWENRFGHQVDDDRLFLLSVERVLQMDDFAEDGIWVTSEEYKSANPDPLRDFAERMIDEINTNNREDILRFCNIYLDLDFQVCDGKMLWVDRLGFDVRFSSPLNDVFEARIPFPREVTDEKGAKSSFNCMSQFAWEVEKNFHAADFEKVKQVKKMEHRGV	At3g21200	XP_004235509.1	9	26	9	2.875	0.0185395	5	3	8	35.2	not assigned.unknown	Cp	30	3	Cp	Cp	Cp	Cp	44.7	thylakoid-peripheral-stromal-side	plastid	-
	Solyc04g009200	GSA	Glutamate-1-semialdehyde-2 1-aminomutase (AHRD V1 **** D7MPQ2_ARALY); contains Interpro domain(s) IPR004639 tetrapyrrole biosynthesis, glutamate-1-semialdehyde aminotransferase	MAAVNGVGLSWPSKLTKNQTPKWGFSPSHrRNACNPSSSSSSATIRMTASVDEKKKTFTLEKSEEAFSKAKELMPGGVNSPVRAFKSVGGQPIIIDSVKGSRMRDIDGNEYIDYVGSWGPAIIGHADDEVLAALAETMKKGTSFGAPCLLENTLAEMVISAVPSIEMVRFVNSGTEACMGVLRLARAFTCRPKIIKFEGCYHGHADPFLVKAGSGVATLGLPDSPGVPKAATIDTLTAPYNDISAVESLFEEHKGEIAAVILEPVVGNAGFIPPKLEFLAAIRKITKENDALLIFDEVMTGFRLAYGGAQEYFGITPDLTTLGKIIGGGLPVGAYGGrRNADIMEMVAPAGPMYQAGTLSGNPLAMTAGIHTLKRLQGQGTYEHLDKITAELTQGILDA…	At5g63570	NP_001234690.2	14	173	14	19.691	0.126978	5	3	8	19.3	tetrapyrrole synthesis.GSA	Cp	48	2	Cp	Cp	Cp	Cp	100	plastid stroma	plastid	plastid
	Solyc08g069030	ALAD HEMB	Delta-aminolevulinic acid dehydratase (AHRD V1 ***- B9RJ27_RICCO); contains Interpro domain(s) IPR001731 tetrapyrrole biosynthesis, porphobilinogen synthase	MASAAMLNAPCNIGAVKFEVKLKPSPNLFCARPSVKLNQrRNAVLTIRASKEGHDNGSSSGPLRKMGLTDEECEAAVVAGNVPEAPPVPPKPAAPDGTPIVSSLPINrRNAPrRNANrRNASSAARAAFQETNISPANLVYPLFIHEGEEDTPIGAMPGCYRLGWRHGLVEEVAKARDVGVNSIVLFPKVPDALKTSTGDEAYNDNGLVPRTIRLLKDKYPDLVIYTDVALDPYSSDGHDGIVREDGVIMNDETVHQLCKQAVAQARAGADVVSPSDMMDGRVGAIRAALDAEGFQHVSIMSYTAKYASSFYGPFREALDSNPRFGDKKTYQMNPANYREALVEMQADESEGADILLVKPGLPYLDIIRLLRDKSPLPIAAYQVSGEYSMIKAGGVLKM…	At1g69740	XP_004245301.1	9	49	9	3.281	0.0211576	5	3	8	19.4	tetrapyrrole synthesis.ALA dehydratase	Cp	46	2	Cp	Cp	Cp	Cp	100	plastid stroma	plastid	plastid
	Solyc07g066470	HEMC	Porphobilinogen deaminase (AHRD V1 ***- B6TVP0_MAIZE); contains Interpro domain(s) IPR000860 tetrapyrrole biosynthesis, hydroxymethylbilane synthase	MEKFVALNASNLSSGSLLPIGFSSPCRKSALSLQrRNARVHVTRASVALEQQAQTKVAVIRVGTRGSPLALAQAYETREKLIASFPDLAEEGAIEIVIIKTTGDKILSQPLADIGGKGLFTKEIDEALINGDIDIAVHSMKDVPTYLPEKTILPCNLPREDVRDAFISLTAGSLAELPSGSTIGTASLrRNAKSQILHRYPSLNVLENFRGNVQTRLKKLNEGVVQATLLALAGLKRLNMTENVSSILSIEDMLPAVAQGAIGIACRSDDETMANYIAALNHEETRLAIVCERAFLTTLDGSCRTPIAGYACRGEDGDCIFKGLVASPDGTRVIETSRKGPYTSEDMIRMGEDAGQELLSKAGPGFFGN	At5g08280	XP_004243981.1	14	108	14	11.743	0.075725	5	3	8	19.5	tetrapyrrole synthesis.porphobilinogen deaminase	Cp	59	1	Cp	Cp	Cp	Cp	99.8	plastid stroma	plastid	-
	Solyc04g079320	UROS HEMD	Uroporphyrinogen III synthase (AHRD V1 **** B0FMS4_HORVU); contains Interpro domain(s) IPR003754 Tetrapyrrole biosynthesis, uroporphyrinogen III synthase	MVLQFKIGYRITAGSYAFHKMSSLSSFSPPPLTTSSSSTTLQRRSCGRCSFRGGACVSLSWITVSCSTKEPKVVVTRERGKNGKLINALVRHGIDSLELPLIQHMHLPDLDRLTSLLTEATFDWIIITSPEAGKVFLDAWKAAGTPSVRVGVVGSGTASIFDEAVQSSKQYLDMAFAPSKATGKVLALELPKNGNDKCTVLYPASAKASTDIEEGLSGRGFEVTRLNTYTTAPVNHVDQYLLELALSVPVVTVASPSALRVWANLTASRQWDNAVACIGETTASAAKKLGFRNIYHPTSPGLEGWVSSVLEALEVHEQVQKV	At2g26540	XP_010320354.1	5	13	5	1.276	0.00822831	5	3	8	19.6	tetrapyrrole synthesis.uroporphyrinogen III synthase	Cp	65	5	Cp	M	Cp	M	59.5	stroma	plastid	-
	Solyc10g007320	UROD1 HEME1	Uroporphyrinogen decarboxylase (AHRD V1 **** D7L387_ARALY); contains Interpro domain(s) IPR006361 Uroporphyrinogen decarboxylase HemE	MAMAFSPLTTSGCSSYCNLGLSWKSSSLFVELGFVSNGSKGVSAKPAKLNASKVFRACASSSNSDPLLVKAArRNAERVSRPPAWMMRQAGRYMAVYRKLAEKHPSFRERSETTDLIVEISLQPWEAFHPDGVIIFSDILTPLPAFGVQFDIEDVRGPVIQSPIRSEEGLKALHSIDLEKLQFVGDSLSILRKEVGEQAAILGFVGAPWTIATYIVEGGTTRTYTKIKDMCHTAPHVLRALLSHLSKAIAEYIVYQVESGAHCIQIFDSWGGQLPPHMWDCWSKPYIDEIVGIIKRKCPQTPLVLYINGNGGLLERMKTTGVDVignaLDWTVDMADGrRNARLGTDIGIQGNVDPATLFCPLPALTDEIKRVVKSAGSSGHILNLGHGVLVGTPEEAV…	At3g14930	XP_010327114.1	6	53	6	4.878	0.0314559	5	3	8	19.7	tetrapyrrole synthesis.uroporphyrinogen decarboxylase	Cp	70	4	Cp	Cp	Cp	Cp	68.1	plastid stroma	plastid	-
	Solyc06g048730	UROD2 HEME2	Uroporphyrinogen decarboxylase (AHRD V1 **** C6TEE8_SOYBN); contains Interpro domain(s) IPR000257 Uroporphyrinogen decarboxylase (URO-D)	MSCIYSSVSSFSISSKSSSSSRSKFKPRISCSVGGTVAEPKTINATEPLLLDAVRGKEVERPPVWLMRQAGRYMKSYQILCEKHPSFRERSENVDLVVEISLQPWKVFQPDGVILFSDILTPLSGMNIPFDIIKGKGPVIFDPPTTLSDVEKVREFIPEESVPYVGEALTILRKEVNNQAAVLGFVGAPFTLASYVVEGGSSKNFTKIKRLAFAEPKVLHSLLQIFATSMAKYIRYQANADHGAQAVQIFDSWATELSPVDFEEFSLPYLKQIVEAVKLTHPDLPLILYASGSGGLLERLPLTGVDVVSLDWTVDMADGrRNARLGPNVAIQGNVDPGVLFGSKEFITNRINDTVKKAGKGKHILNLGHGIKVGTPEENVAHFFEVAKGLRY	At2g40490	XP_004240850.1	13	120	13	22.714	0.146472	5	3	8	19.7	tetrapyrrole synthesis.uroporphyrinogen decarboxylase	Cp	30	1	Cp	Cp	Cp	Cp	96.2	plastid stroma	plastid	-
	Solyc10g005110	CPO1 HEMF	Coproporphyrinogen III oxidase aerobic (CPO) (AHRD V1 ***- A9DTF4_9FLAO); contains Interpro domain(s) IPR001260 Coproporphyrinogen III oxidase	MFSAVLSSPSSSSTSTFPLRYSSLSSVANLSSLPLTIGCRSTSKKSTHNNCSIKVQVSSRMIEKETPETERPHTFLRESDEGSSGDESNSVRARFEKMIREVQDSVCAALEDVDGGGKFKEDVWSRPGGGGGISRVLQDGNVFEKAGVNVSVVYGVMPPEAYRAARPVDNGNTKPGPIPFFAAGVSSVIHPKNPFAPTVHFNYRYFETDAPKDTPGAPRQWWFGGGTDLTPAYIFEEDVKHFHSVQKGACDKFDASFYPRFKKWCDDYFYIKHRDErRNAGLGGIFFDDLNDYDQEMLLSFSTECANSVIPAYIPIIEKRKDTPFTDEHKAWQQLrRNAGRYVEFNLVYDRGTTFGLKTGGRIESILVSLPLSARWEYNADHQPVEGSEEWKLLDACIN…	At1g03475	XP_004248412.1	14	158	14	12.895	0.0831536	5	3	8	19.8	tetrapyrrole synthesis.coproporphyrinogen III oxidase	Cp	40	1	Cp	Cp	Cp	Cp	100	plastid stroma	plastid	plastid
	Solyc01g079090	PPO HEMG	Protoporphyrinogen oxidase (AHRD V1 ***- O64384_SOLTU); contains Interpro domain(s) IPR004572 Protoporphyrinogen oxidase	MTTTAVVNHPSIFTHRSPLPSPSSSSSSSPSFLFLNRTNFIPYFSTSKRSSVNCNGWRTRCSVAKNYTVPPSEVDGNQLPELDCVVVGAGISGLCIAKVISANYPNLMVTEARDRAGGNITTVERDGYLWEEGPNSFQPSDPMLTMAVDCGLKDDLVLGDPDAPRFVLWKDKLRPVPGKLTDLPFFDLMSIPGKLRAGFGAIGLRPSPPGYEESVEQFVrRNANLGAEVFERLIEPFCSGVYAGDPSKLSMKAAFGKVWKLEQTGGSIIGGTFKAIKERSSNPKPPRDPRLPTPKGQTVGSFRKGLRMLPDAICERLGSKVKLSWKLSSITKSDKGGYLLTYETPEGVVSLRSRSIVMTVPSYVASNILRPLSVAAADALSSFYYPPVAAVTISYPQEA…	At4g01690	NP_001335308.1	10	44	10	2.162	0.0139417	5	3	8	19.9	tetrapyrrole synthesis.protoporphyrin IX oxidase	Cp	60	1	Cp	Cp	Cp	Cp	99.5	plastid	plastid	plastid
	Solyc04g015490	CHLD	Magnesium chelatase subunit D (AHRD V1 *-*- A8I531_CHLRE); contains Interpro domain(s) IPR011776 Magnesium chelatase, ATPase subunit D	MTFSSSFCTSTVTYTSLSSSQSSTLFTYLKPCPILSSTCFPNRKRLKFRFSINATATIDSPNGAVVAEAEEPEKKPQNNSFGRQYFPLAAVVGQDAIKTALLLGAIDREIGGIAISGKRGTAKTVMARGLHAILPPIEVVVGSMANADPNCSEEWEDGLADRVEYDSDGNIKTQIVKSPFVQIPLGVTEDRLIGSVDVEESVKSGTTVFQPGLLAEAHRGVLYVDEINLLDEGISNLLLNVLTEGVNTVEREGISFRHPCKPLLIATYNPEEGAVREHLLDRIAINLSADLPMSFEDRVAAVDIATRFQECSNEVFKMVDEETDNGKTQIILAREYLKDVTVSRDQLKYLVMEAIRGGCQGHRAELYAARVAKCLAAIDGRERVNVDDLKKSVELVILP…	At1g08520	XP_004236627.1	17	37	17	1.622	0.0104595	5	3	8	19.1	tetrapyrrole synthesis.magnesium chelatase	Cp	66	1	Cp	Cp	Cp	Cp	100	plastid	plastid	-
	Solyc10g008740	CHLI	Magnesium chelatase ATPase subunit I (AHRD V1 **** Q53RM0_ORYSJ); contains Interpro domain(s) IPR011775 Magnesium chelatase, ATPase subunit I	MASLLGTSSSSSAAAILASTPFTSRSSKSAALSLFPSSGHSQGRKFYGGIRLPVKKGRSQFHVAISNVATEISPAQEQAQKLAEDSQRPVYPFPAIVGQDEMKLCLLLNVIDPKIGGVMIMGDRGTGKSTTVRSLVDLLPEIKVISGDPFNSDPDDQEVMSAEVRDKLRKGEQLPVSLTKINMVDLPLGATEDRVCGTIDIEKALTEGVKAFEPGLLAKANRGILYVDEVNLLDNADHLVDVLLDSAASGWNTVEREGISISHPARFILIGSGNPEEGELRPQLLDRFGMHAQVGTVRDAELRVKIVEERGRFDKNPKEFRESYKGEQEKLQSQITSARSGLSSVTINADHDLRVKISKVCAELNVDGLRGDIVTNRAARALAALKGRDKVTPEDIATV…	At4g18480	XP_004248139.1	12	130	12	9	0.0580367	5	3	8	19.1	tetrapyrrole synthesis.magnesium chelatase	Cp	51	1	Cp	Cp	Cp	Cp	100	stroma	plastid	-
	Solyc04g015750	HLH GUN5	Magnesium chelatase H subunit (AHRD V1 ***- D5KXY0_VITVI); contains Interpro domain(s) IPR011771 Magnesium-chelatase, subunit H	MASLVSSPFTLPNSKVEHLSSISQKHYFLHSFLPKKTNPTFSKSPKKFQCNAIGNGLFTQTTQEVrRNAIVPENLKGLATVKIVYVVLEAQYQSALTAAVQTLNKNGEFASFEVVGYLVEELRDENAYKTFCKDLEDANIFIGSLIFVEELALKVKSAVEKERDRLDAVLVFPSMPEVMRLNKLGSFSMSQLGQSKSPFFQLFKKKKSSAGFSDQMLKLVRTLPKVLKYLPSDKAQDARLYILSLQFWLGGSPDNLVNFLKMVSGSYVPALKGVKMDYSDPVLYLDSGIWHPLAPCMYDDVKEYLNWYATrRNADTNEKLKSSSAPVignaLVLQRSHIVTGDESHYVAVIMELEARGAKVIPIFAGGLDFSGPVERYFIDPITKKPFVNSVVSLTGFA…	At5g13630	XP_004236610.1	11	20	11	0.682	0.00439789	5	3	8	19.1	tetrapyrrole synthesis.magnesium chelatase	Cp	49	3	Cp	Cp	Cp	Cp	99.6	plastid	plastid	plastid
	Solyc06g073290	GUN4	Gun4-like protein (AHRD V1 *-*- D8RVB0_SELML); contains Interpro domain(s) IPR008629 GUN4-like	MATNSFNSIHTLRRRHSIDCPYPFSSSSPSSFFPKTITKNPSSFSNHNLITFSVSSTTPTTTTTTTITTTPFDTLEQHLISQNFREADEETRRLLIVLAGEAAVKRGYVFFSEVQFISESDLKEIDSLWRKYSDGKFGYSVQKKIWNNKANRDFTNFFIKIGWMKKLESEEVDQHNYRAFPNEFIWELNDETPEGHLPLTNALRGTQLLKSIFTHPAFVEDGDEEEEKEDSNNNSGGDKGKAKKGGLFGGLRSKLFSKPDYSF	At3g59400	XP_004241410.1	4	19	4	2.162	0.0139417	5	3	8	19.4	tetrapyrrole synthesis.regulation	Cp	55	2	Cp	possibly Cp	Cp	N	65.4	plastid	plastid	-
	Solyc03g118240	CHLM	Magnesium-protoporphyrin IX methyltransferase (AHRD V1 **** D7MGJ7_ARALY); contains Interpro domain(s) IPR010251 Magnesium protoporphyrin O-methyltransferase	MAFSSPLFSPVNFTLNPNPQLNHPKCTKPNNRRNLTICAIPPLSAATDISAVTDSLDGKTLAVLGGSSVAALAAILSLADPERRRQLQAEEVGGGDKEVVREYFNNNGFQRWKKIYGDTDDVNKVQLDIRLGHSKTVENVMKMLTEEGSLQGVTVCDAGCGTGCLSIPLAKEGAIVSASDISASMVAEAQKQAQEELFKGKDDQSLAPVMPKFEVKDLESLDGKYDTVVCLDVMIHYPQSKADGMIAHLASLAENRLILSFAPKTFYYDLLKRIGELFPGPSKATRAYLHAEADVERALQKAGWKIKKRGLIATQFYFAKLIEAVPA	At4g25080	XP_004235845.1	19	84	19	43.367	0.279653	5	3	8	19.11	tetrapyrrole synthesis.magnesium protoporphyrin IX methyltransferase	Cp	44	1	Cp	possibly Cp	Cp	Cp	99.8	plastid	plastid	-
	Solyc10g077040	HL27 CRD1	Magnesium-protoporphyrin IX monomethyl ester (AHRD V1 **** B9SCF8_RICCO); contains Interpro domain(s) IPR008434 Magnesium-protoporphyrin IX monomethyl ester aerobic oxidative cyclase	MAAEMALVKPITKFNTINTTTARLSSrRNALPFTVRMSAATTTPPTSKPSKKPQKQGIKESLLTPRFYTTDFDEMETLFNTEINKNLNEAEFEALLQEFKTDYNQTHFVRNKEFKEAADKIQGPLRQIFVEFLERSCTAEFSGFLLYKELGrRNALKKTNPVVAEIFSLMSRDEARHAGFLNKGLSDFNLALDLGFLTKARKYTFFKPKFIFYATYLSEKIGYWRYITIYRHLKTNPKFICYPIFKYFENWCQDENRHGDFFSALMKAQPQFLNDWKAKLWSRFFCLSVYVTMYLNDCQRTDFYEGIGLNTKEFDMHVIIETNRTTARIFPAVLDVENPEFKRKLDRMVEINTKLIAVSESDEIPLVKNFKKIPLIAALASELLAAYLMKPIESGSVDF…	At3g56940	NP_001332768.1	7	17	7	1.291	0.00832504	5	3	8	19.12	tetrapyrrole synthesis.magnesium-protoporphyrin IX monomethyl ester (oxidative) cyclase	Cp	34	3	Cp	Cp	Cp	Cp	89.9	envelope-inner-peripheral-stromal-side thylakoid-peripheral-stromal-side	plastid	-
	Solyc07g054210	POR1	Protochlorophyllide reductase like protein (AHRD V1 ***- Q0WVW0_ARATH); contains Interpro domain(s) IPR005979 Light-dependent protochlorophyllide reductase	MALQAASLLPSAFSLHKEGKTSSANLKDSSFFGVALSCNLKSKFTPAAGNKELTRKLAIVPIRAQTAATTPAITQSTSGQKKTLRKGNVIITGASSGLGLATAKAIGESGDWHVIMACRDFLKAEKAAKSLGIPKENYTVMHLDLASLESVRQFVDNFrRNASGRPLDALVCNAAVYLPTAKEPTFTADGFELSVGTNHLGHFLLSRLLLDDLKQSDYPQKRLIIVGSITGNTNTLAGNVPPKANLGDLRGLSGGLNSLNCSPMIDGGEFDGAKAYKDSKVCNMLTMQEYHrRNAFHEETGIAFASLYPGCIAETGLFRNHIPLFRTLFPPFQKYITKGYVSEEEAGKRLAQVVRDPSLSKSGVYWSWNSTSSSFENQLSKEASDAEKARKLWEVSEKL…	At5g54190	NP_001296970.1 Gabruk et al 2020	7	66	5	2.511	0.0161922	5	3	8	19.14	tetrapyrrole synthesis.protochlorophyllide reductase	Cp	63	2	Cp	Cp	Cp	Cp	100	thylakoid-peripheral-stromal-side	plastid	plastid
	Solyc10g006900	POR2	Protochlorophyllide reductase (AHRD V1 ***- Q8LAV9_ARATH); contains Interpro domain(s) IPR005979 Light-dependent protochlorophyllide reductase	MALQASSLLPSTFSKGKASATLKNSSIFGASLSDYTKSDFGSSSFRVKNQrRNASSNGGVVRATMVASPGVTTNSPSGKKTLRKGCVIVTGASSGLGLATAKALSETGKWHVIMACRDFLKAEKAAKSVGMSKENYTIMHLDLASLDSVRQFVDNFrRNASGRPLDVLVANAAVYQPTAKEPSFTAEGFELSVGTNHLGHFLLSRLLLDDLKQSDYPSKRLIIVGSITGNTNTLAGNVPPKANLGDLRGMAGGLNGINSSAMIDGGEFDGAKAYKDSKVCNMLTMQEFHrRNAYHEETGITFASLYPGCIATTGLFREHIPLFRLLFPPFQKYITKGYVSETESGKRLAQVVSDPSLTKSGVYWSWNKDSASFENQLSEEASDAEKARKVWEVSEKLVG…	At5g54190	NP_001304903.1 Gabruk et al 2020	6	25	1	1.015	0.00654525	4	2	6	19.14	tetrapyrrole synthesis.protochlorophyllide reductase	Cp	60	1	Cp	Cp	Cp	Cp	100	thylakoid-peripheral-stromal-side	plastid	-
	Solyc12g013710	POR3	Protochlorophyllide reductase (AHRD V1 ***- Q8LAV9_ARATH); contains Interpro domain(s) IPR005979 Light-dependent protochlorophyllide reductase	MALQAAALLPSTFSIPKEGKTSASLKDSSLFGISLSNADHVKSDFGSSFKIKSGRKSSLGAIRAETMVASPGVTSTPVTGKKTLRKGCVVITGASSGLGLATAKALAETGKWHVIMACRDFLKAERAAKSAGMPKENYTIMHLDLASLDSVRQFVDNFrRNASGNPLDVLVCNAAVYQPTAKEPSFTAEGFELSVGTNHLGHFLLSRLLIDDLKQSDYPSKRLIIVGSITGNTNTLAGNVPPKANLGDLRGLARGLDGLNSSAMIDGGDFDGAKAYKDSKVCNMLTMQEFHrRNAYHEETGITFASLYPGCIATTGLFREHIPLFRLLFPPFQKFITKGFVSEAESGKRLAQVVSDPSLTKSGVYWSWNKNSSSFENQLSEEASDVEKARKVWEVSEKL…	At5g54190	XM_004251804.4 Gabruk et al 2020	7	27	2	1.371	0.00884092	5	3	8	19.14	tetrapyrrole synthesis.protochlorophyllide reductase	Cp	22	2	Cp	Cp	Cp	Cp	100	thylakoid-peripheral-stromal-side	plastid	-
	Solyc01g111750	CPP1	Chaperone-like protein of POR1; Heat shock protein DnaJ domain protein (AHRD V1 *--- B7K9K5_CYAP7)	MATSLSVRPNRTIISSDPAGSTRPNPIRRPPISAHLPKIPNSDSFRRRRLVFTSHRRKLNPAVQAGSRADDSAPFEMSVELKLLGVTEGASFDDILRAKKSIISSCKDDPDTIAQVEAAYDMLLMQSLSQRRSGKVVDSSVRFADVKAASGMGSMPKWLQTTVKSSPVAVEAPASKELGVQAGVYGALMVLTYVNGASTPLGVSYGADVPGLILATSFGATLYFMTKKNVKLGKASVITIGGLVAGAVVGSAVENWLQVDIVPLLGIHTPATVKGTLIITGLDSCSEVQLLATLQIFRV	At2g20920	XP_010315389.1 Lee et al (2013)	1	2	1	0.194	0.00125101	2	0	2	35.2	not assigned.unknown	Cp	64	1	Cp	Cp	Cp	Cp	93.1	mitochondria envelope	plastid	plastid
	Solyc01g067290	DVR	NAD-dependent epimerase/dehydratase (AHRD V1 **-- C8RY11_9RHOB); contains Interpro domain(s) IPR016040 NAD(P)-binding domain	MSLFAPSSGLTLLQSTKDQNFRQLFSSHFINHVQVRTVPYATPFLSVNVSGRPFRVSSRKLKPIIASAASTVETPKISFRGKNPKDINVLVVGSTGYIGKFVVKELTSRGFNVIAVAREKSGIKGKNSKDDTLEQLNGANVCFSDVTNLETLEKSVQGLGVSIDVVVSCLASRNGGVKDSWNIDYEATKNSLVAGRKFGASHFVLLSAICVQKPLLEFQRAKLKFEAELMKEAEEDNGFTYSIVRPTAFFKSLGGQVELVKDGKPYVMFGDGKLCACKPISEQDLASFMADCVLKEDKINQVLPIGGPGKALTPLEQGEMLFKLVGKEPKFLKVPIEIMDFAIGFLDFLVKIFPSLEDAAEFGKIGRYYAAESMLIWDPDTGEYNAEATPSYGNDTLED…	At5g18660	XP_010321210.1	10	46	10	5.31	0.0342416	5	3	8	19.13	tetrapyrrole synthesis.divinyl chlorophyllide-a 8-vinyl-reductase	Cp	65	2	Cp	possibly Cp	Cp	Cp	87.8	plastid	plastid	plastid
Chlorophyll cycle	Solyc09g091100	HCAR	7-hydroxymethyl chlorophyll A (MHCHL) reductase, HCAR	MAFLTGKISTLPFKFYTVSSSSQQQDANQNLKSVKIREDWRKKSRPIPPGGTYPAKNADHCSHCGLCDTYYIAHVNNACAFLGDGMSRVEALEPIVHGRGRKEDSLDEIYMGVYENLLYARKTKPVEGAQWTGIVTTIAVEMLKAGMVEAVICVQSDPEDRFAPRPVLARTPEEVIAAKGVKPTLSPNLNTLALVEAAGVKRLLFCGVGCQVQALRSVEQYLNLEKLYVLGTNCVDNGPREGLDKFLKAASSEPETVLHYEFMQDYKVHLKHLDGHIEEVPYFCLPANDLVDVIAPSCYSCFDYTNGLADLVVGYMGVPKYSGISMMQHPQYVTVRNERGREMLNLIENLLEITPTISSGKRRPFVVETVKADDEAKFGRGPSQPAPKFVGNLIAFLLN…	At1g04620	NP_001309778.1	7	22	7	2.162	0.0139417	5	2	7	18	Co-factor and vitamine metabolism	-	-	5	-	possibly M	Cp	Cp	75	plastid	plastid	-
Chlorophyll degradation	Solyc03g115980	GGR CHLP	Geranylgeranyl reductase (AHRD V1 ***- Q1ZYL0_OLEEU); contains Interpro domain(s) IPR011774 Geranylgeranyl reductase, plants and cyanobacteria	MASIALKTFIGLRQSSPENNSIKISKSLPTNHTHrRNALRINASKSSPRVTGRNLRVAVignaGGPAGGAAAETLAKGGIETFLIERKMDNCKPCGGAIPLCMVGEFDLPLDIIDRKVTKMKMISPSNVAVDIGQTLKPHEYIGMVrRNAEVLDAYLRDRAAEAGASVLNGLFLRMDMPKAPNSPYVLHYTSYDSKTNGAGEKCTLEVDAVignaADGANSRVAKSINAGDYEYAIAFQERIRISDDKMKYYENLAEMYVGDDVSPDFYGWVFPKCNADHVAVGTGTVTHKADIKKFQLATRLRADSKITGGKIIRVEAHPIPEHPRPrRNALQDRVALVGDAAGYVTKCSGEGIYFAAKSGRMCAEAIVEGSENGKRMVDESDLRKYLEKWDKTYWPT…	At1g74470	XP_004235993.1	11	38	9	2.631	0.0169661	5	3	8	16.1.1	secondary metabolism.isoprenoids.non-mevalote pathway	Cp	40	2	Cp	Cp	Cp	Cp	99.8	thylakoid	plastid	-
	Solyc03g044470	RCCR	Red chlorophyll catabolite reductase (Fragment) (AHRD V1 **** Q1ELT8_SOLLC); contains Interpro domain(s) IPR009439 Red chlorophyll catabolite reductase (ACD2)	MAVPLSSAKFHTSILTQSLPSSSSRSFSVGKRFCCSSSSTSMEHHESKFKEFPYASVPHRELMVELVSTVENRLGESLLPCTLPSHVQYFENESATAHASLYVRSGNSSSQVDFILGSWVHCNLPTGGALNITSLSVYLRPSTDAPNFLIEVIQSSPTTLILILDLPPRKDLVQHPDYLKTFYEETQLDKQRQLLEKLPEVKPYFSSSLYIRALVSPSAILVSIETDPSQAIRIDEIIQNADHISPVAKVMLDTWLNLCACTErRNALTDDESKDLAKRDQIIKNKTIEIDLESSFPRLFGQQVANQVLGVLREIYNS	At4g37000	XP_004234668.1	7	38	7	5.105	0.0329197	5	3	8	20.1	stress.biotic	Cp	34	1	Cp	Cp	Cp	Cp	100	thylakoid mitochondria	plastid	plastid
	Solyc11g066440	PaO ACD1	Pheophorbide a oxygenase, chloroplastic; lethal leaf spot 1-like protein (NCBI)	MVSSLLLPTPQILSISSSLQSSLPFKPHNFLQITRKKNTLISSPLRVAAPPTTTTATEEEEKLDSKSSDIEDTENDEQDSSSKFSWRNADHWYPVSLVEDLDPSLPTPFQLLNRDIVIWFDKSGSQWVALDDKCPHRLAPLSEGRLDENGDLQCSYHGWSFNGCGSCTRIPQAASQGPEAKAFQSPRACATRFPTMVSQGLLFVWPDENGWERAQATKPPMLPEDFDKPEFATVTIQRDLFYGYDTLMENVSDPSHIDFAHHKVTGRRDRAKPLPFKMEASGPWGFAGANNDKPKITAKFVAPCYSMNKIEIDTKLPIVGDQKWVIWICSFNVPMAPGKTRSIVCSARNFFQFTVPGPAWWQVFPRWQEHWTSNKVYDGDMIVLQGQEKVFLSKSKENG…	At3g44880	NP_001234535.2	1	3	1	0.105	0.000677094	3	0	3	31.5.1	cell.cell death.plants	Cp	55	1	Cp	Cp	Cp	PM	85.5	thylakoid	plastid	plastid
	Solyc05g032660	NOL	Chlorophyll(ide) b reductase NOL, chloroplastic isoform X4	MAEMSVTTASLQSFPKSLLCSLSTRKFNSSFHPSAILSPISRFCLISKFNSFRFSAAVVKAASSPHANTKEPMLPPYDVLITGASKGIGYALAKEFLKAGDNVIICSRSDERVVSALDRLRVETGKQHVWGTKCDVREGDDVKNLVAFAKEKLQYIDIWINNAGSNAYSFKPLAEASDEDLIQVVTTNTLGLMICCREAINLMQNQPRGGHIFNIDGAGSDGRPTPRFAAYGATKRSVVHLTKSLQAELEMQDVKNVLVHNLSPGMVTTDLLMSGANTKQAKFFINVLAEPADVVAEYLVPNIRSIPTNGSTKATYIRFLTGLKAYSQIFSRIAFGArRNANRYVLED	At5g04900	XP_010321272.1	2	4	2	0.233	0.0015025	3	2	5	26.22	misc.short chain dehydrogenase/reductase (SDR)	Cp	55	1	Cp	Cp	Cp	Cp	94	thylakoid	plastid	-
	Solyc02g070490	CLD1	Chlorophyll dephytylase1, CLD1; Alpha_beta hydrolase fold IPR000073 Alpha_beta hydrolase fold-1	MKATTIWGLKKRRGTCDLKHFLPQEASLFSVLLCKKHKYSHCAASLSMKAMVVAVRASPLVFLPSSPFAASRNLKKQCSNTIISFNIRLQSSHSKSSCITISSIKCSASSTSAIVSKEEEPLPLEVNEIKTLCKTWVWRGYNINYLSYPGHNNDTCRPSLLLVHGFGASVAHWRRNIATLAQNYRVYAIDLLGFGASDKPEGFAYNMETWAELILDFVNQVIQRPTVLVGNSVGSLACVIAAADPSQTSIQGLVLLNCAGGMNNKAIVDDWRIKLLSPLLWLVDFLLSQKPIASSIFTRVKQRENLKNILLSVYGNKESVDEDLVDIIRTPADSEGALDAFVSIVTGPPGPNPVQLIPKMTLPILVLWGDQDPFTPIDGPVGRYFSSLPSQKPNVSLFL…	At5g38520	XP_004233123.1	4	16	4	0.778	0.00501695	5	2	7	35.1	not assigned.no ontology	-	-	2	-	possibly M	Cp	Cp	54.13	thylakoid	plastid	plastid
Sirohaem Synthesis	Solyc02g086560	SIRB	Sirohydrochlorin ferrochelatase	MDSLSLQSHLSLRSSTSTYPARGPGIAVPEFVKLLKGPSKSRYLPQRYCMATSSREGLKGIEEGDGVIIVNADHGSRRKESNLMLNGFVAMFRERTKYPIVEPAHMELAEPSIRDAFSLCVQQGARRVIVSPFFLSPGRHWNQDIPSLTAEAAKEHPGVPYVITAPLGLHELLVDVVNDRINHCLSHIAGKADECSVCAGTGKCQLRQ	At1g50170	XP_004232317.1	2	9	2	0.778	0.00501695	4	3	7	19.32	tetrapyrrole synthesis.sirohydrochlorin ferrochelatase	Cp	13	5	Cp	possibly Cp	Cp	Cp	96.4	plastid	plastid	-
Haem synthesis & catabolism	Solyc05g018650	FC2	Ferrochelatase 2 (AHRD V1 **** O64391_SOLTU); contains Interpro domain(s) IPR001015 ferrochelatase	MAPPVIFCREISPSPANCTSYSPFLQLDTQCTSSFAASCLRLPKNYSYVARCSLKWSEKPSMMPEALLTSSPQQLSTNPVFGEGKIGVLLLNLGGPETLEDVQPFLFNLFADPDIIRLPRLFRFLQRPLAQFISVARAPKSKEGYASIGGGSPLrRNAITDAQAEALRKALSEKNVPAKVYVGMRYWHPFTEEAIERIKRDGITKLVVLPLYPQFSISTSGSSLRLLESIFREDEYLVNMQHTVIPSWYQREGYIKAMADLMEKELNMFERPEEVMIFFSAHGVPLAYVEEAGDPYKAEMEECVDLIMEELEKrRNAVHNAYTLAYQSRVGPVEWLKPYTDETIIELGKKGVKSLLAVPISFVSEHIETLEEIDVEYKELALESGIQNWARVPALGVEP…	At2g30390	XP_010321072.1	3	3	3	0.585	0.00377238	2	0	2	19.2	tetrapyrrole synthesis.ferrochelatase	Cp	51	2	Cp	Cp	Cp	Cp	56.6	plastid	plastid	-
	Solyc04g079290	HO2	Heme oxygenase 2 (AHRD V1 **** Q94FW6_SOLLC); contains Interpro domain(s) IPR016951 Haem oxygenase (decyclizing), plant	MATLTCYCSSSSLPIPKPTSKSSLSLLHKTPKPQFFVKFTSFLSISSKYQNWTHRVLQCSNFNAASSFTLSESDLETEPEPETETETEEDEDEDEEEEEEEEGGGGRGGGRDGVISIEKPPVKRKRKrRNARYRKQYPGEKKGITEEMRFVAMKFRNSKGKKKSESDDEMKDDGYESVSSDEDDVGGGGSGGGEATWQPSIEGFLKYLVDSKLVFSTIERIVDESSDVSYAYFrRNATGLERTECISKDLKWFGQQGHEIPEPSIPGVTYANYLEELAEKTPRLFLSHFYNIYFSHIAGGQVIAKKAFERLLEEKELEFYKWEGDEEKLLRDVRDSFNMLAKHWSRDDKNKSLREVTKAFRFMGQIVRLIIL	At2g26550	NP_001234531.1	2	2	2	0.334	0.00215381	2	0	2	19.21	tetrapyrrole synthesis.heme oxygenase	Cp	58	2	Cp	Cp	Cp	Cp	92.6	plastid	plastid	-
	Solyc12g009470	HO1 HY1 GUN2	Heme oxygenase 1 (aka GUN2) (AHRD V1 **** Q94FW7_SOLLC); contains Interpro domain(s) IPR016951 Haem oxygenase (decyclizing), plant	MASISPLSQSQPLLEKPQFTVLNKSQNQFFSIPFSRFTQSCNLSLKKSRMVVVSATTAAEKSNKRYPGEAKGFVEEMRFVAMKLHTKDQAKEGEKEPVDQPLAKWEPSVEGYLKFLVDSKLVYDTLERIVEKAPFPEYAEFRNTGLERSEVLAKDLEWFRQQGHAIPEPSTPGVTYASYLEELSEKDPQAFICHFYNTYFAHSAGGRMIGKKVAEKVLDKKELEFYKWDGDLSQLLQNVRDKLNKVAENWTREEKNHCLEETEKSFKFSGAILRLIFS	At2g26670	NP_001308017.1	7	25	7	1.783	0.0114977	5	3	8	19.21	tetrapyrrole synthesis.heme oxygenase	Cp	54	1	Cp	Cp	Cp	C	65.6	plastid	plastid	-
	Solyc01g008930	HY2 GUN3	Phytochromobilin synthase	MECFSSLGWFCISNPSFIGLKSKKKYSLSRKCRSFNEVGSKCVSMSYTENESSGVSYKKLIHFALEETNTHTLLSPSPLQEKYSSLLSMDDKTELQMLSFEAHKIRLLRSLCIEGSDGMQVLDFAAFPKPEFDLPIFCANFFTTAKMNIIVLDLNPLHDIMDQEDYKEKYYKDLITLGLKYSKLLPWGGKLTSESLRFFSPIVIWTRFSSSPHNHSVLFSAFKDYYQAWLGLMDRSEGETDASQIACNCEAQHRYLTWRSEKDPGHGVLKRLIGEDLAKDVITKFLFNGVNELGNKTFLDYFPEYRCEDGKVNEKRSMIGKSFENRPWNARGEFIGDRVEIV	At3g09150	NP_001234133.2	3	4	3	0.54	0.0034822	1	2	3	1.1.5.4	PS.lightreaction.other electron carrier (ox/red).ferredoxin oxireductase	Cp	43	3	Cp	Cp	Cp	Cp	99.9	plastid stroma	plastid	-
	Solyc03g063240	HOZ	Haem oxidase; Pyridoxamine 5'-phosphate oxidase-related FMN-binding protein (AHRD V1 ***- D6UPC6_9BACT); contains Interpro domain(s) IPR012349 FMN-binding split barrel	MKTLVLAPSPLRTFSPFSSFLYSNLNNNATHNYLLSPSPSKSFSSLTSTSPLLAMASQNVSSGDEVDIFQLIQAHQEKAARLSPIEDVRTLLHYSLRGVLSTFSQKYEGYPSASMVDFACDTYGSPILAVSNLAVHTKDLLATSRCSLLVARDPEDRTDLVITVHGDAVPVPEIEKEGIRATYLARHPTAFWVDFGDFHFMRIEPRIVRYVVGVATAILGSGEFSKEEFRTAKVDPIYQFSRPITSHMNKNADHMEDTKLIVQHATSVPVDFAYMLDIDSLGFNVKACYKDTDLKLRVPFPRRAVDRKDVKALIVEMLQAART	At3g03890	XP_004234820.1	5	15	5	2.981	0.019223	5	3	8	35.2	not assigned.unknown	Cp	53	3	Cp	possibly M	Cp	Cp	98.3	plastid stroma	plastid	-
A Proteins were identified by acetone preparations and/or the gel method. For emPAI and Mol% calculations, only the data from the acetone prepartions were used. Proteins identified solely by the gel method have data for the number of peptides, PSMs and unique peptides.
B Names of tomato proteins were based on the literature, NCBI annotation (identified in BlastP searches), and/or SolyGenomics descriptor. In a small number of cases, tomato protein names were assigned based on NCBI annotations and the Arabidopsis homolog.
C Some Sol Genomics descriptors were updated when NCBI annotations and Arabidopsis gene annotations were aligned.
D Target P's subcellular locations are: chloroplast (Cp), mitochondria (M), secretory (S), and no predicted location is indicated by a dash (-).
E ChloroP was used to predict the presence of a chloroplast transit peptide (Y) and the lack of a predicted transit peptide is indicated with a dash (-).
F Predotar's predicted subcellular locations were: chloroplast/plastid (Cp),endoplasmic reticulum (ER) or mitochondrion (M). For proteins with localization predictions that were less clear, Predotar provided categorized of possibly Cp, M and ER. Proteins with unresolved locations or that did not have a homolog detected by Predotar are indicated with a dash (-).
G WoLF PSORT's and YLoc's predicted subcellular locations were: chloroplast/plastid (Cp), cytosol (C), cytoskeleton (Cy), endoplasmic reticulum (ER), extracellular (EX), golgi apparatus (G), mitochondrion (M), nucleus (N), peroxisomes (P), plasma membrance (PM), and vacuole (V). Proteins with no chloroplast location in WoLF PSORT are indicated by not Cp.The number of proteins predicted to be in t…

## Sheet: Table S9D-Redox
Table S9D. Redox homeostasis
Category	Gene and protein descriptors						ProteomicsA							Number times detected			Bin codes		Algorithms								Databases
	Tomato Gene ID	Gene name B	Protein DescriptorC	Sequence	Arabidopis homolog	NCBI accessionB	Peptides	PSMs	Unique Peptides	emPAI	Mol %	Acetone samples	gel	Acetone samples	Gel samples	Total	Bincode	Name	TargetP D ver.1	Transit peptide length	TargetP (reliability class)	ChloroP E	Predotar F	WoLF PSORT G	YLoc G	YLoc % Confidence	PPDB	SUBA4	plprot
Thioredoxins & proteins with thioredoxin domains	Solyc05g056300	Trx-f	Thioredoxin-like protein (AHRD V1 *-*- D8UJJ9_VOLCA); contains Interpro domain(s) IPR015467 Thioredoxin, core	MALQVQVNQVPLKSSMAPVPAQSASSSWRFNKQSVVCVAGDYGFSSRVLRNRGLSLRVKCSSSDATVTTTTVTVGQVTEVCKDTFWPIVEAAGEKTVVVDMYTQWCGPCKVIAPKFQELSKKYNDVVFLKLDCNQDNRPLAKELGIKVVPTFKILKNNKIVKEVTGAKLDDLVAAIEGVRSS	At3g02730	XP_004239649.1 Cheng et al (2014)	4	20	4	1.848	0.0119169	5	3	5	3	8	21.1	redox.ascorbate and glutathione	Cp	59	2	Cp	Cp	Cp	Cp	74.8	thylakoid-peripheral-stromal-side plastid stroma	plastid	plastid
	Solyc10g008390	Trx-m1/2	Thioredoxin (AHRD V1 ***- A7LNX7_9CARY); contains Interpro domain(s) IPR005746 Thioredoxin	MSTILDSVAISSIFSSNLrRNASLRPSPPFSAAWDrRNAAPLKFTGFSISYNPFDNQVSLTSSSRICrRNATNSVSGEASDVVFDVPSVTEETWDSLVLNATEPVVVEFWAPWCGPCRMFHPVISDLAKQYTGRVKCFKLNTDDSPSVASRYGIRSIPTIMIFVNGEKKDAIIGAVPKTSLTASIDKFL	At4g03520	XP_004248160.1 Cheng et al (2014)	5	29	3	9	0.0580367	5	2	5	2	7	21.1	redox.ascorbate and glutathione	Cp	70	1	Cp	Cp	Cp	Cp	91.8	thylakoid-peripheral-stromal-side	plastid	plastid
	Solyc01g108020	Trx-m3	Thioredoxin m (AHRD V1 ***- B9HS17_POPTR); contains Interpro domain(s) IPR015467 Thioredoxin, core	MAASASCATPYSKSPSSLSRSLSLQYRELCNLPYKCKQHQNVRIGLSVENDKGFGTWKTSSPSSLRVFCIRDTQAAAVTAKSWDKLILGSDTPVLVEFHATWCGPCQMVHRVIDEIAGEYSGRLKCYVLDADREPKVAENYDIKAVPVVLLFKNGEKFESVignaTMSKEFYVAAIERLLSS	At2g15570	XP_004230773.1	4	22	4	0.848	0.00546834	5	3	5	3	8	21.1	redox.ascorbate and glutathione	Cp	6	2	-	Cp	Cp	Cp	99.8	plastid	plastid	-
	Solyc12g013810	Trx-m4.1 (Trx-m1/4)	Thioredoxin (AHRD V1 ***- A7LNX7_9CARY); contains Interpro domain(s) IPR005746 Thioredoxin	MAGLLETIAVPRAAAAAASPSLSPVSGrRNASSVKFSLFNGLKIQSTRSSVSFSSFTKSVPSRGGRIVCEAQDTAVLVPGVNDQSWETLVignaSKLPVLVEFWAPWCGPCRMIHPVIDELSQEFADKFKFFKVNTDESPGIATRYGIRSIPTVMIFKDGEKKDTVignaAVPKTTLTACIEKFL	At3g15360	XP_004251856.1 Cheng et al (2014)	8	97	7	62.096	0.400427	5	3	5	3	8	21.1	redox.ascorbate and glutathione	Cp	66	1	Cp	Cp	Cp	Cp	99.9	thylakoid-peripheral-stromal-side plastid stroma	plastid	plastid
	Solyc10g006970	Trx-m4.2 (Trx-m2)	Thioredoxin m (AHRD V1 ***- B9HZV8_POPTR); contains Interpro domain(s) IPR005746 Thioredoxin	MAGMLETIAIPRASVFSSSSARSVPIADLSVSGGrRNASSAVNFSQFSGLKVQLNRSPVSLSSRSESVrRNAGGRIVCEAQESTTVTAAAVTDKTWKSLVIESKLPVLVEFWAPWCGPCKMIHPIINELAQEYAGKFSFFQLNTDESPSIASEYGIRSIPTVMIFKNGEKKDAVignaAVPKTTLATSIDKFL	At3g15360	XP_004248268.1 Cheng et al (2014)	6	83	5	5.813	0.0374852	5	3	5	3	8	21.1	redox.ascorbate and glutathione	Cp	83	1	Cp	Cp	Cp	Cp	98.9	thylakoid-peripheral-stromal-side plastid stroma	plastid	plastid
	Solyc07g063190	Trx-m4.3	Thioredoxin (AHRD V1 ***- A7LNX7_9CARY); contains Interpro domain(s) IPR005746 Thioredoxin	MAAVLETITVPRASALPSSSLAQVAGYSFSGPRFSVSFSQFSGLKIQPIRSSVSTSSCSKIIPRGGRVVCEAQDTAVEVATVSDKTWKTLVVESTVPVLVEFWAPWCGPCRMIHPVIDELAKEYVGKLTCLKLNTDESPSIATEFGIRSIPTVMIFKNGEKKDAIIGAVPKSTLTTSIEKFL	At3g15360	XP_004244226.1	7	106	4	20.544	0.132478	5	3	5	3	8	21.1	redox.ascorbate and glutathione	Cp	78	1	Cp	Cp	Cp	Cp	99.8	thylakoid-peripheral-stromal-side plastid stroma	plastid	plastid
	Solyc01g008250	Trx-x	Thioredoxin X (AHRD V1 ***- B6T9S0_MAIZE); contains Interpro domain(s) IPR015467 Thioredoxin, core	MATMASVATSTSRISYPMTHSFNTTCNFASPFRSSFSSLAWKKVRFSIGNRGRKLGFRNCSTLRISCGGGLTEIKEDEFSDVVLKSDRPVLVEFVATWCGPCRLIGPAMESVAEEYKEKITVVKINADHDASPKLIEEYKVYGLPTLILFKDGKEVPDSKREGAITKVKLKEYLDGLLKTVSIA	At1g50320	XP_004228532.1 Cheng et al (2014)	8	59	8	7.377	0.0475707	5	3	5	3	8	21.1	redox.ascorbate and glutathione	Cp	75	1	Cp	Cp	Cp	Cp	99.9	plastid stroma	plastid	plastid
	Solyc04g071560	Trx-y	Thioredoxin y (AHRD V1 ***- B9GTH5_POPTR); contains Interpro domain(s) IPR005746 Thioredoxin	MAFSIAAAGAATGAGALASPSANGSSSTKFSYLASLQFPRELrRNAVQIGNYGLKSKKGSSRLVPLVEAKKQTFSSFEDMLENSEKPLLVDFYATWCGPCQFMVPILNEVGESMKDKIQVVKIDTEKYPALADKYKIQALPTFILFKDGDVCDRFEGALNAPQLMQRIKSALEVKQ	At1g76760	XP_004237802.1 Cheng et al (2014)	4	23	4	4.623	0.0298115	5	3	5	3	8	21.1	redox.ascorbate and glutathione	Cp	64	1	Cp	Cp	Cp	Cp	99.9	plastid stroma	plastid	-
	Solyc01g096480	Trx-z	Thioredoxin protein (AHRD V1 ***- Q6JE37_NICBE); contains Interpro domain(s) IPR013766 Thioredoxin domain	MQAASLAFHPPALRTSPSYLSSKLPHHLNYSLFKHAPSTSTLSLTQVLSRNTICKPPAVGKYVREDYLVKKLSAKEIQELIKGERNVPLIIDFYATWCGPCILMAQELEMLAVEYENNALIVKVDTDDEYEFARDMQVRGLPTLYFISPDSSKDAIRTEGLIPIQMMRDIIDNDL	At3g06730	NP_001234469.1	4	12	4	1.31	0.00844756	5	1	5	1	6	21.1	redox.ascorbate and glutathione	Cp	64	2	Cp	-	Cp	Cp	100	plastid	plastid	plastid
	Solyc07g032786	ACHT2	Thioredoxin family protein (AHRD V1 ***- D7MCJ1_ARALY); contains Interpro domain(s) IPR015467 Thioredoxin, core	MGFSLKSLGFSLSSSSSLLTSFSSSLNSTLTPTPNQKLHKRGVSFSDSPSTPLEFVSRIAFTTNKRFPTLKAHATITRTEEPKWWERNAGPNMLDIHSTQEFLEALSQAGDRLVIVEFYGSWCASCKALFPKFCRTAQEHPEILFLKVNFDANKSMCKALNVKVLPYFHFYRGADGQLESFSCSLAKFQKIKDAIQLHNTDRCSIGPPIGVGDLTLELLSATKDVSAAASST	At4g29670	XP_004253215.1	4	19	3	2.511	0.0161922	5	3	5	3	8	21.1	redox.ascorbate and glutathione	Cp	78	2	Cp	Cp	Cp	Cp	98.27	plastid stroma	plastid	-
	Solyc04g081970	CDSP32	Thioredoxin (AHRD V1 ***- D8U146_VOLCA); contains Interpro domain(s) IPR013766 Thioredoxin domain	MATLTNFLLKPSPNLASITKISPSLYSNFPFEKSKQSIFKNLKTNKPLLITKATAAPDVEKKVAKSERVQKVNSMEELDEALKNAKNRLVVVEFAGKDSERSKNIYPFMVNLSKTCNDVDFLLVignaDETEKTKALCRREKIDKVPHFNFYKSMEKIHEEEGIGPDQLAGDVLYYGDSHSEVVQLHSREDVEKVIQNADHKIDKKLIVLDVGLKHCGPCVKVYPTVIKLSKQMADTVVFARMNGDENDSCMQFLKDMDVIEVPTFLFIRDGEICGRYVGSGKGELIGEILRYQGVRVTY	At1g76080	XP_004238392.1	13	84	13	13.678	0.0882028	5	3	5	3	8	21.1	redox.ascorbate and glutathione	Cp	52	3	Cp	Cp	Cp	C	91	plastid stroma	plastid	plastid
	Solyc10g080080	NTRC1	Thioredoxin reductase (AHRD V1 ***- B9H9S9_POPTR); contains Interpro domain(s) IPR005982 Thioredoxin reductase	MANTTPNITNSVGIGIRIRTKIRPASTSMAATPAALSTGHCIPTGLLVINSGTSrRNAGGAARVDSVNGHLTRSRASSFSIRAAAEVEPVGTSSSAQGIENLVIIGSGPAGYTAAIYAARANLKPVVFEGFQAGGVPGGQLMTTTEVENFPGFPEGITGPDLMDRMrRNAQAERWGAELYQEDVEFIDVKNAPFTVHSSERKVKCHSIIVATGANArRNALGLPREDEFWSRGISACAICDGASPLFKGQVLAVVGGGDTATEEAIYLTKYARHVHLLVRKDQLRASRAMQDRVFNNPNITVHFNTETVDVVSNPKGQMSGILIRKADTQEESVLEAKGLFYGIGHSPNSQLLEGQVELDNSGYILVKEGTANTSVEGVFAAGDVQNADHEWRQAITAA…	At2g41680	XP_004249259.1 Isigha et al (2012)	14	79	11	10.159	0.0655105	5	3	5	3	8	21.1	redox.ascorbate and glutathione	Cp	80	1	Cp	Cp	Cp	Cp	93.1	plastid stroma	plastid	plastid
	Solyc10g078920	Trx-L2I WCRKC1	Thioredoxin-like 5 IPR013766 Thioredoxin domain	MSILAPNSQILYREIYNRENQHLFLNSGGNVNIVKSYGFCFVDKRRGDWKKKMKRELRIHASWPDLSRPAAVEMQPIESSEQLDQILDSAKELSQPVIIDWMAAWCRKCIYLKPKLEKLAAEFDTKVKFYYVDVNKVPQTLVKRGNISKMPTIQLWKYGEMKAEVignaGHKAWLVIEEVREMIKNFV	At5g06690	XP_004249182.1	1	3	1	0.233	0.0015025	3	3	3	3	6	21.1	redox.ascorbate and glutathione	-	-	3	-	-	Cp	M	69.93	plastid stroma	-	-
	Solyc04g078910	Trx-like2	Thioredoxin-like 2 IPR013766 Thioredoxin domain	MQRLSILDWQCNLSFRCINLLDGESAHTLLHSFSCRRGSKSYHPRTRLCSKLRHGDLNVTLQSLLRQCSEIHSTVSDNIDELLDEEDELCPVECVREFKTDEEFSIILEKAKKAGSLVVVDFFRTACGSCKYIEQGFQKLCRGAGDEQAPVIFLKHNVIDEYDEQSEVAERLRIKTVPLFHFYKNGVLLEAFPTRDKERILAAILKYSAPASADA	At1g07700	XP_010320331.1	9	39	9	7.254	0.0467776	5	2	5	2	7	21.1	redox.ascorbate and glutathione	-	-	5	-	-	Cp	M	61.05	plastid stroma	plastid	-
	Solyc07g020860	TPX1	Thioredoxin dependent peroxidase Peroxiredoxin IPR013740 Redoxin	MAPIAVGDVIPDGTVSYFDEQDQMQTVSVYSLAKGKKVIIFAVPGAFTPTCSMKHVPGFIEKAAELKSKGVDEILCISVNDPFVMKAWAKTYPENKHVKFLADGAGKYTHALGLELDLSDKGLGVRSRRYALLVDDLEVKVANIESGGEFTVSGADEIVL	At1g65980	NP_001234171.1	2	3	2	0.931	0.00600357	3	1	3	1	4	21.5	redox.ascorbate and glutathione	-	-	2	-	-	not Cp	C	99.93	-	cytosol	-
	Solyc07g064940	HCF164	Thioredoxin family protein (AHRD V1 *-*- Q1EPD8_MUSAC); contains Interpro domain(s) IPR013766 Thioredoxin domain; HCF164- reduction cytochrome/b6f complex	MAKVASSsignalHRPKPFHFRPYQTLHSVKPFNYQLNNLQKYQRIYCQTEPKTGDCCQPSSDPYESAVKEKSSIDPGAGAESSKAEVSPPSTGPEYPTRDFNRRVALVSVIAALGLFSSQRLDLGVSLKDITAAALPYEEALSNGKPTVVEFYADWCEVCRELASDVYKVEQQYKDRVNFVMLNVDNTKWEQELDEFGVEGIPHFAFLDKDGNEEGNVVGRLPKQYLLENVDALAKGKESIPYSRAVGQYTSAESRKVHQISDPRSHG	At4g37200	XP_004244089.1	5	7	5	1.276	0.00822831	4	3	4	3	7	29.8	protein.assembly and cofactor ligation	M	112	4	-	possibly M	Cp	Cp	94.2	thylakoid-peripheral-stromal-side	plastid	plastid
	Solyc04g064930	-	Thioredoxin family protein IPR012336 Thioredoxin-like fold	MVVIPTVTGLSTGAHLLSVPRTIATASRASPSSLPSLCYLKKSYYSPQRRSILPARKLVIRAARTESKGMSLGFRAPNFELTEPLTDKVWNLDDFEAYPALLVMFICNHCPFVIHLKKDIVKLSNFYMKKGLAVVAISSNSVVTHPQDGPEFMAEDAKFFKYPFPYLYDESQEVARDFVAVCTPEFFLFKKDGRRPFELVYHGQFDDSRPSNNMPVTGRDLSLAIDCVLSGQPVSSTQKPSIGCSIKWNPGGKQ	At1g21350	XP_004237747.1	4	8	4	1.512	0.00975016	5	3	5	3	8	35.2	not assigned.unknown	Cp	61	2	Cp	Cp	Cp	Cp	99.5	plastid	plastid	-
	Solyc02g064550	-	Thioredoxin superfamily protein-PRX-domain	MESLQQSSLTFATKFPSFCSFSPTPNTFKFLHPFPSSAIPLTATTPKRISSFVPKAAASTAAFAQDIGDVLADVSIFTATGQSVKFEDLWDQNEGVAVVALLRHFGCPCCWELAKALKETKERFDSAGVKLIAVGIGAPNKARILAERLPFPLDCLYADPDRKAYDVLGLYYGVGRTFFNPASAKVLSRFNELREATKNYTIEATPDDRSGVLQQGGMFLFKGKQLLYAWKDEGTGNADHAPMEDIFDICCKVPVA	At5g65840	XP_004233465.1	5	20	5	1.424	0.00918269	5	3	5	3	8	35.2	not assigned.unknown	Cp	55	1	Cp	Cp	Cp	Cp	99.5	plastid stroma	plastid	-
	Solyc02g079730	MRL7 (WV)	Thioredoxin-like fold domain-containing protein MRL7, chloroplastic [Solanum lycopersicum, 0.0, 99.43%], manual annnotation	MVIHSALNLNFCAISSLSALKAGQHCSSCSFSNFLLPPPLKRLTCFATSKKSEEEHVSDPKNNSGSRSRKAIRSRESKVTHNEDKDSAKIFPSTIPKKPRRGRRSEAAAVEDFVRDSLEKTFASIREQNSDMMKDTENILKDRVDDDTESDESSDDEDDSSRDKKEKKMIIEEEDPNWPLDADVGWGIRASEYFDKHPIKNVignaEDGVEIDWEGEIDDCWVKEINCLEWESFAFHPSPLIVLVFERYNRASDNWKALKELEKAAKVYWSAKERLPPRTVKIDINIERDLAYALKVKESPQILFLRGNRILYREKEIRTADDLVQMIAYFYYNAKKPSCIDDAALSQQSYTSQIKKEAVEHGSIPV	At4g28590	XP_004232766.1 Gao et al (2019)	1	1	1	0.155	0.00099952	1	1	1	1	2	35.2	not assigned.unknown	Cp	46	5	Cp	-	Cp	N	69.5	plastid nucleoid	plastid	-
	Solyc04g071420	MRL7-like	MRL7-likeThioredoxin family protein IPR012336 Thioredoxin-like fold	MDEDERREWRRKIRDVIKMSPDVEEEVDPVERRQKMQKLLADYPLVVDEEDPDWPEDADGRGFNLDQFFNKISIKNVKKDDDENDDDNELVWQDDDYIRPVKDLTTAEWEETVYKDISPLIVLVHNRYKRPKENEMARDELEKAIHIIWNCRLPSPRCVAIDAVVEVDLVSALKVSVFPELIFTKAGKILYREKVSRTADELSKMMAFFYYGAAKPPCLSSIENSQELIPTI	At2g31840	XP_004237791.1	5	8	5	2.162	0.0139417	5	3	5	3	8	35.2	not assigned.unknown	-	-	2	-	-	Cp	N	99.47	plastid stroma	-	-
	Solyc09g007190	AAED1	Thioredoxin like protein AAED1; contains Interpro domain(s) IPR012335 Thioredoxin fold	MAISLNSGLTVAVSRSIRQTPLHNVNLTTNPFSFNCNFSLTPNFLAISASHRSSSVIYSSRETETPVVSEDTINVLDDVQVFDLNGQGVPISDLWKDRKAVVAFARHFGCVLCRIRADYLAAEKDKMDAAGVALVLIGPGSVDQARKFYEQTKFKGEVYADPSYRSYEALRFVSGITTTFTPGAGLKIIQAYMEGYRQDWELSFEKDTRTRGGWRQGGIIVAGPGKNNITYIHKDKEAGDDPDIKEILNACCVQG	At2g37240	XP_004246708.1	10	48	10	5.494	0.0354282	5	3	5	3	8	35.1	not assigned.no ontology	Cp	48	1	Cp	Cp	Cp	Cp	97.8	plastid stroma	plastid	-
	Solyc09g009820	-	Thioredoxin family protein; Glutathione S-transferase domain protein (AHRD V1 *--- C6RLV9_ACIRA); contains Interpro domain(s) IPR004045 Glutathione S-transferase, N-terminal	MTGVLNVSPAPIFRPVSSHKLSRNNRVLFVKSMAQSSDSSNGSTSVSTQAEPNSSFSPPPNFKPPKPKPFTPRGDKILDILGASLALVFRLGTGALVSGYSASFVPKNEVPSDQYALEIAGFKVKESSNIGPRPEKPIEIYEFESCPFCRKVREIVAILDLDILYYPCPRNGPNFRPKVGQMGGKQQFPYMVDPNTGVSMYESDEIIKYLVGKYGDGNVPLMLSLGLFTTLTAGFAMIGRMGKGSSYKPSKMPPKPLELWAYEPSPFCKVVREVLVELELPHILLSCARGSPKRQILYERVGHFQVLSHT	At5g03880	XP_004246517.1	1	2	1	0.292	0.00188297	2	2	2	2	4	35.2	not assigned.unknown	Cp	97	1	Cp	Cp	Cp	Cp	93.6	thylakoid	plastid	plastid
Peroxiredoxins	Solyc07g042440	Prx-Q	Alkyl hydroperoxide reductase/Thiol specific antioxidant family protein (AHRD V1 **-- B0C2Q1_ACAM1); contains Interpro domain(s) IPR000866 Alkyl hydroperoxide reductase/ Thiol specific antioxidant/ Mal allergen	MASLSVSVKHTLPSLLQYAQTPKKPISQNLTIVSRSSQSHFYGLEVLHSPSFSTPSSSRTSIVAKVNKGSAPPPFTLKDQDGKNVSLSKFKGKPVVVYFYPADETPGCTKQACAFRDSYEKFKKAGAQVVGISGDDIESHKAFAKKYRLPFTLLCDEGNKVRKEWGIPGDLFGTLPGRQTYVLDKNGVVQLIYNNQFQPEKHIDETLKLLQSL	At3g26060	NP_001296952.1	7	51	7	6.017	0.0388007	5	3	5	3	8	21.5	redox.ascorbate and glutathione	Cp	63	2	Cp	Cp	Cp	Cp	89.5	plastid	plastid	plastid
	Solyc10g083650	Prx-II-E	Peroxiredoxin ahpC/TSA family (AHRD V1 **-- Q1YGN4_MOBAS); contains Interpro domain(s) IPR013740 Redoxin	MAATTAAAIFTLPKLCKSSISPKSISLFSPKSTLSSSFSISSVPFKVHHSKRTVRPLSYTTPRISAVISVGDKLPNSTLSYFDSSDELQTLSVSDLTSGKKVVLFAVPGAFTPTCSQKHLPGFVEKSKELKSKGVDTIACISVNDAFVMKAWKENLNISDEVLLLSDGNLEFTKAIGCELDLTDKPIGLGVRSrRNAYAMLVDDGVVKVLNLEEGGAFNVSSAEDILKAL	At3g52960	XP_010312248.1	3	21	3	1.848	0.0119169	5	3	5	3	8	21.5	redox.ascorbate and glutathione	Cp	65	1	Cp	Cp	Cp	Cp	95.7	plastid stroma	plastid	plastid
	Solyc10g082030	2-CYS-Prx1 SlPrx	Peroxiredoxin (AHRD V1 **-- Q9FE12_PHAVU); contains Interpro domain(s) IPR000866 Alkyl hydroperoxide reductase/ Thiol specific antioxidant/ Mal allergen	MACSASSSTALLSYTSRASISPKSHISQSISVPSAFNGLRNCNPLVSRVARSINTRVAQAERRRFAVCASSELPLVGNQAPDFEAEAVFDQEFIKVKLSEYIGKKYVILFFYPLDFTFVCPTEITAFSDRYEEFEKVNTEILGVSVDSVFSHLAWVQTERKSGGLGDLNYPLISDVTKSISKAYNVLIPDQGIALRGLFIIDKEGVIQHSTINNLGIGRSVDETLRTLQALQYVQENPDEVCPAGWKPGEKSMKPDPKGSKEYFASI	At5g06290	NP_001315984.1 Cheng et al (2016) Ishiga et al (2012)	7	118	4	6.197	0.0399615	5	3	5	3	8	21.5.1	redox.ascorbate and glutathione	Cp	68	1	Cp	Cp	Cp	Cp	100	plastid stroma	plastid	plastid
	Solyc01g007740	2-CYS-Prx2	Peroxiredoxin (AHRD V1 **-- Q9FE12_PHAVU); contains Interpro domain(s) IPR000866 Alkyl hydroperoxide reductase/ Thiol specific antioxidant/ Mal allergen	MASIVTSTALLSSSNPRVFASASASSALPKLPSFSQSTIVPSSSSFNGLRSCNTSVSRINKSRSFVVRASSEVPLVGNKAPDFEAEAVFDQEFIKVKLSEYIGKKYVILFFYPLDFTFVCPTEITAFSDRYEEFKNVNTEILGVSIDSVFSHLAWVQTDRKTGGLGDLNYPLISDVTKSISKSYNVLIPDQGIALRGLFIIDKEGVIQHSTINNLAIGRSVDETLRTLQALQYVQENPDEVCPAGWKPGDKSMKPDPKGSKEYFASI	At5g06290	NP_001315983.1 Cheng et al (2016)	9	107	6	10.938	0.0705339	5	3	5	3	8	21.5.1	redox.ascorbate and glutathione	Cp	68	1	Cp	Cp	Cp	Cp	99.9	plastid stroma	plastid	plastid
Glutathione peroxidases & Glutaredoxins	Solyc08g080940	GPXle-1	Glutathione peroxidase-like encoding 1 (AHRD V1 ***- Q4VY91_CAPCH); contains Interpro domain(s) IPR000889 Glutathione peroxidase [PREDICTED: probable phospholipid hydroperoxide glutathione peroxidase]	MLCSTARVLLIPKQNLSILRRFSSILRQTQFNSVFNLPVSSFSKPIRTVLPNSLVTSKGFELWGLRSNADHTMASQSSNPQSVYDFTVKDAKGKDVDLSIYKGKVLIIVNVASQCGLTNSNYTDMTELYKKYKDQGLEILAFPCNQFGGQEPGNIEDIQQMVCTRFKAEYPIFDKVDVNGDNAAPLYRFLKSSKGGFFGDGIKWNFSKFLIDKEGHVVDRYSPTTSPASMEKDIKKLLGVA	At4g11600	NP_001234567.2 Depège et al (1998)	3	6	3	0.778	0.00501695	5	1	5	0	5	21.2.2	redox.ascorbate and glutathione	Cp	71	5	Cp	M	Cp	M	72.4	-	-	-
	Solyc08g006720	sPHGPX	Glutathione peroxidase (AHRD V1 ***- D6BR59_9ROSI); contains Interpro domain(s) IPR000889 Glutathione peroxidase	MASFASSSTFSPICTFFSKPKLNLYCNSSSSSSYKPTCNSSKSSFFQNGFSLLTAKSFGSSLKSKNMANTIYARAATEKTIYDFTVKDIDGKDVPLSTFKGKVLLIVNVASRCGLTTSNYTELSSVYEKYKNQGLEILAFPCNQFGAQEPGSNPEIKQFACTRFKAEFPIFDKVDVNGPNTAPVYQFLKSSAGGFLGDLVKWNFEKFLVDKNGKVVERYPPTTSPLQIEKDIQKLLAA	At4g31870	XP_004244516.1 Chen et al (2004)	9	39	9	7.254	0.0467776	5	3	5	3	8	21.2	redox.ascorbate and glutathione	Cp	74	1	Cp	Cp	Cp	Cp	99.9	plastid stroma	plastid	plastid
	Solyc12g056230	GPXle-2	Glutathione peroxidase IPR000889 Glutathione peroxidase	MAGQPEKKPESVYDFTLKDAKGNDVDLSTYKGKVLLIVNVASKCGLTDSNYKDLNHLHEKYKDQGLEILAFPCNQFGAQEPGSNDEIVEFACTRFKSEFPIFDKIEVNGENTSPLYKFLKSAKWGLLGDNIQWNFAKFLVDKNGQVSDRYYPTTSPLSMERDIKVLLEIE	At4g11600	NP_001308422.1 Depege et al. (2016)	2	5	1	0.468	0.00301791	4	1	4	1	5	21.2.2	redox.ascorbate and glutathione	-	-	2	-	-	Cp	C	97.25	-	-	-
	Solyc06g083690	GRX-C1	Glutaredoxin (AHRD V1 *-*- B5A8A6_WHEAT); contains Interpro domain(s) IPR011899 Glutaredoxin, eukaryotic and viruses; monothiol glutaredoxin-S10 (NCBI)	MAATMSLTKNFTTFSIPQSFHPQNGTQIGRHLQRIPNSNYSVPSVRLHRFGSRIENDGPRKIGRVQIRAMSGSFGSRLEESVKKTITENPVVVYSKSWCSYSTEVKVLFKRLGVDPLVIELDEMGPQGPQLQKVLERLTGQHTVPNVFIGAKHIGGCTDTIKLYRKGELESLLSEAKAGKTES	At4g28730	XP_010323070.1	5	61	5	4.012	0.0258715	5	3	5	3	8	21.4	redox.ascorbate and glutathione	Cp	68	1	Cp	Cp	Cp	C	99.5	plastid stroma	plastid	plastid
	Solyc09g005620	GRX1	Glutaredoxin (AHRD V1 *-*- D7G070_ECTSI); contains Interpro domain(s) IPR004480 Glutaredoxin-related protein	MATFNISFLTQPAIFSSQNTPSFSSYSLPKTSFRFPSITLRPKTRTTTRHHASIVVAALKKLSETDPLTVPLQSDEIAGSFPKESGVYAVYDTNGDLQFVGISRNIAASVISHKNSVPQLCSSVKVGVVEEPDRTALTESWKSWMEEHITTNGKVPPGNEPGNSTWVRQPPKKKADLRLTPGRNVQLTVPLEDLIDRLVKENKVVAFIKGSRSAPQCGFSQRVVSILESEGVDYESIDVLDEEYNSGLRETLKNYSNWPTFPQIFVKGELVGGCDILTSMYEKGELASLFKS	At2g38270	NP_001234270.2 (Guo et al 2010)	8	47	8	6.197	0.0399615	5	3	5	3	8	34.21	transport.calcium	Cp	56	1	Cp	Cp	Cp	C	53.3	plastid stroma	plastid	-
	Solyc02g082200	GRX4	Glutaredoxin (AHRD V1 ***- A9LC71_PTEVI); contains Interpro domain(s) IPR004480 Glutaredoxin-related protein	MSLGISLQWQLPSVIRSTTTSAAQRTTDVFLSFPTVHSGRALQSSAIPSSSIATGKRDGRLRSLRCLSALDPNLKSTLDKVVTSQKIVLFMKGTKEFPQCGFSNTVVQILKALNAPFETLNILENEALRQGLKEYSSWPTFPQLYIDGEFFGGCDIVVEAYKSGELQELLERTLCS	At3g54900	NP_001310489.1	2	10	2	1.154	0.00744159	5	3	5	3	8	34.21	transport.calcium	Cp	88	2	Cp	Cp	Cp	Cp	75.3	plastid	plastid	-
	Solyc11g012940	GRX-like	Glutaredoxin-like (AHRD V1 ***- B6T1H7_MAIZE); contains Interpro domain(s) IPR008554 Glutaredoxin 2	MAAGLAIGFSAVRPPLKQALGVKILNYQKSKWVFSPLAFSSSSSSSSSTSRKLILYSKPGCCLCDGLKEKLNAAFSLSSPHSLHDVQLQVRDITSNPDWEKAYQYEIPVLARVRPDGTEEVLPRLSPRLGVEAIHKKIAAALTE	At4g08280	XP_004250322.1	4	14	4	2.594	0.0167275	5	2	5	2	7	35.2	not assigned.unknown	Cp	63	5	Cp	Cp	Cp	Cp	96.8	plastid	-	-
Ferredoxin-thioredoxin reductases	Solyc01g087520	FTRA	ferredoxin-thioredoxin reductase variable chain (AHRD V1 *-*- B6UCW8_MAIZE); contains Interpro domain(s) IPR004207 ferredoxin thioredoxin reductase, alpha chain	MTASTSAFFSSSVLNIPNSKNQSLIIPSHKNILNPNPFPQIKIHKSRNPQKPNGYFISKSVIVDNPSTVSSTSSLSVDAGVDEKDAAAMGKVGSKVRVTVPLKVYHVPKVPELDLDGRTGTVKQYVAVHKGKQISANLPYKVEFVVDDLEGRSTPVKFSAHLKEDEFEFLD	At5g23440	XP_004229646.1	5	12	5	1.61	0.0103821	5	1	5	2	7	21.1	redox.ascorbate and glutathione	Cp	87	1	Cp	Cp	Cp	Cp	100	plastid stroma	plastid	-
	Solyc02g087230	FRTB	Ferredoxin-thioredoxin reductase catalytic chain (AHRD V1 ***- B6TNR7_MAIZE); contains Interpro domain(s) IPR004209 Ferredoxin thioredoxin reductase, beta subunit	MRTLQASTSYSVGFGISSFATRPKPSSTHRCLTVAKMEPSEKSVEIMRKFSEQYARRSETYFCMDKGVTSVVIKGLAEHKDTLGAPLCPCRHYDDKAAEAQQGFWNCPCVPMRERKECHCMLFLTPDNDFAGEEQTITMEEIKETTANM	At2g04700	XP_004232269.1	1	4	1	0.585	0.00377238	4	3	4	3	7	21.1	redox.ascorbate and glutathione	Cp	34	3	Cp	possibly M	Cp	Cp	100	plastid stroma	plastid	-
Superoxide dismutases	Solyc06g048410	Fe-SOD2B (PAP9)	Superoxide dismutase (AHRD V1 **** Q7YK44_SOLLC); contains Interpro domain(s) IPR019833 Manganese/iron superoxide dismutase, binding site IPR001189 Manganese/iron superoxide dismutase	MAATASANSLTSAFLPPQGFNGSSKSLQWRTQKKQFGRKAGSATITAKFDLIPPPYPMDALEPHMSSRTFEFHWGKHHRAYVDNLNKQIDGTELDGKTLEDIILVTYNNGAPLPAFNNAAQAWNHQFFWESMKPNGGGEPSGELLELINRDFGSYDTFVKEFKAAAATQFGSGWAWLAYKPEDKKLALVKTPNAENPLVLGYTPLLTIDVWEHAYYLDFQNrRNAPDYISIFMEKLVSWEAVSIRLKAASA	At5g51100	NP_001233789.2	5	75	4	25.827	0.166546	5	3	5	3	8	21.6	redox.ascorbate and glutathione	Cp	58	2	Cp	Cp	Cp	Cp	100	plastid stroma	plastid	plastid
	Solyc03g095180	Fe-SOD2A (PAP9)	Superoxide dismutase (AHRD V1 **** Q7YK44_SOLLC); contains Interpro domain(s) IPR001189 Manganese/iron superoxide dismutase	MAAATASATLFSPFLPSPGFHESCRSLNWRTHKKQIASKAGTVKVTAKFELNPPPYPMNALEPHMSRTTFEYHWGKHHRAYVDNLNKQIVGTELDELTLEDIILVTYNQGNLLPPFNNAAQAWNHQFFWESMKPGGGGQPSGELLKLINRDFGSFEAFVKEFKAAAATQFGSGWAWLAYKANRLDVGNASNPHPSDEDKKLVIVKTPNAINPLVWDYSPLLTIDVWEHAYYLDFRNrRNAPDYISIFMEKLVSWEAVSSRLEAAQAQAAEREKEEERKKREEEEEYQDGNEVREMYVETTDSEAD	At5g51100	XP_004235206.1	12	109	11	157.489	1.01557	5	3	5	3	8	21.6	redox.ascorbate and glutathione	Cp	44	2	Cp	Cp	Cp	Cp	99.6	plastid stroma	plastid	plastid
	Solyc02g021140	Fe-SOD3	Superoxide dismutase (AHRD V1 ***- B9S4J6_RICCO); contains Interpro domain(s) IPR001189 Manganese/iron superoxide dismutase	MSWCCCNRLSTSTSSDLWRQFNIPNVGLRQKKRSVSAYYGLKTPPYKLDALEPYMSQRMVEIHWGEHHRGYVESLNKQIENNDIFYGCTMEQLIKLTYNNGNPLPEFSDAAQVWNHDFFWESMQPGGGDMPKLGFLHQIDKDFGSFTNFKDKFIEAALTLFGSGWIWLVLSREEKRLAIIKTSNAVNPLVWNDIPLIGLDLWEHAYYLDYKNDKAKYVNVFMNHLVSWDAALGRMARAQAFVNLGEPKIPVA	At5g23310	XP_004231531.1	2	10	2	1.512	0.00975016	4	0	4	0	4	21.6	redox.ascorbate and glutathione	M	34	5	-	-	Cp	Cp	93.1	plastid	plastid	-
	Solyc11g066390	SOD3	Superoxide dismutase (AHRD V1 ***- Q7XAV2_SOLLC); contains Interpro domain(s) IPR018152 Superoxide dismutase, copper/zinc, binding site	MAAHSIFTTTSTTNSFLYPISSSSSSPNINSSFHGVSLNVKSKFGQSLTLYAVTTPKPLTVFAATKKAVAVLKGNSNVEGVVTLSQDDDGPTTVNVRITGLAPGLHGFHLHEYGDTTNGCMSTGAHFNPNKLTHGAPGDEIRHAGDLGNIVANADGVAEVTLVDNQIPLTGPNSVVgranaLVVHELEDDLGKGGHELSLTTGNAGGRLACGVVGLTPI	At2g28190	NP_001234769.2	5	81	5	38.811	0.250273	5	3	5	3	8	21.6	redox.ascorbate and glutathione	Cp	62	1	Cp	Cp	Cp	Cp	99.9	thylakoid-peripheral-stromal-side plastid stroma	plastid	plastid
	Solyc08g079830	CCS1	Cu/Zn-superoxide dismutase copper chaperone (AHRD V1 **** Q9BBU5_SOYBN); contains Interpro domain(s) IPR001424 Superoxide dismutase, copper/zinc binding	MAFLRSIVTAKTTAIAAAIPAAAFAVSSISSSSQFERPLKNLKFGSISSSNSILQLSFAKNLQKKSPPSALHMETHSSNHQTSSDNGVVLPELLTEFMVDMSCQGCVSAVKSKLQTVEGVKNVDVDLDNQVVRILGSSPVKTMTEALEQTGRKARLIGQGVPDDFLISAAVAEFKGPDIFGVVRLAQVNMELTRIEANFSGLSPGKHAWSINEFGDLTRGAASTGKLYSLPLGDLGTLDVDEKGEAFYSGPKEKLRVADLIGRAIAVYATEDKSDPGLTAAVIARSAGVGENYKKLCTCDGTTIWEATSKI	At1g12520	NP_001334014.1	8	19	8	2.162	0.0139417	5	3	5	3	8	21.6	redox.ascorbate and glutathione	Cp	83	5	Cp	M	Cp	Cp	68.9	plastid stroma	plastid	-
Ascorbate & glutathione	Solyc11g011250	DHAR3	Dehydroascorbate reductase 3, DHAR3	MSTAKITPSAASFATSIKHLAGIQLPRCQSTIFTSNSTKFRAPrRNAGFTVSMAASIETPLEVCVKQSITTPNKLGDCPFTQRVLLTLEEKHLPYDMKFVDLSNKPDWFLKISPEGKVPLIKLDEKWVPDSDVISQALEEKFPKPPLTTPPEKASVGSKIFPKFVAFLKSKDSGDGTEQALLDELTAFNDYLKENGPFINGNEVSAADLSLGPKLYHLEIALGNYKNWSIPDSLSYMKSYMKSIFSRESFINTRALKEDVIEGWRPKVMG	At5g16710	NP_001234224.2	10	112	10	6.743	0.0434824	5	3	5	3	8	21.2.1	redox.ascorbate and glutathione	Cp	48	2	Cp	Cp	Cp	Cp	95.3	plastid stroma	plastid	plastid
	Solyc05g054760	DHAR1	Dehydroascorbate reductase (Fragment) IPR017933 Glutathione S-transferase_chloride channel, C-terminal	MVVEVCVKAAVGAPDVLGDCPFSQRVLLTLEEKKVTYKKHLINVSDKPKWFLEVNPEGKVPVINFGDKWIPDSDVIVGIIEEKYPNPSLIAPPEFASVGSKIFPTFVSFLKSKDSSDSTEQALLDELKALEEHLKAHGPYINGQNVCSVDMSLAPKLYHLEVALGHFKKWSVPESLSHVRNYMKLLFERESFQKTKAEEKYVIAGWAPKV	At1g19570	NP_001234822.2	8	29	5	5.105	0.0329197	5	3	5	3	8	21.2.1	redox.ascorbate and glutathione	-	-	5	-	-	not Cp	C	91.68	-	peroxisome	plastid
	Solyc08g081530	MDAR	Monodehydroascorbate reductase	MATTPNTMSIKQGLSLWCPQSAVLNRISRVSVPSRSFrRNASFVAASSFDNENREYVVVGGGNAAGYAARTFVEHGQANGKLCIVTKEPYAPYERPALTKAYLFPLDKKPARLPGFHTCVGAGGERQTPDWYKEQGIEMLYEDPVTGIDIEKQTLTTNSGKLLKYGTLIIATGCTASRFPEKIGGNLPGVHYIRDVADADSLISSLGKAKKLVVVGGGYIGMEVAAAAVAWKLDTTIIFPEEHLLSRLFTPSLAQKYEQLYQDSGVKFVKGAKIKHLESGPDSRVTAVKLEDGSSIETDTVVignaIGAKPAVSPFDMVGLNNTVGGIEVDGQFRTNIPGIFAIGDVAAFPLKIYNRIARVEHVNADHARKSAQHCIKSLLTAHTHTYDYLPYFYSRVF…	At1g63940	NP_001234013.2	15	83	15	4.995	0.0322103	5	3	5	3	8	21.2.1	redox.ascorbate and glutathione	Cp	43	2	Cp	Cp	Cp	Cp	92.1	plastid stroma mitochondria	plastid	plastid
	Solyc06g060260	sAPX	Stromal ascorbate peroxidase 7	MASLTGAVSCFLPAARLTVSRATARLYFSSSSVSPLKCPKSSPLLSHVFRYQKQSLVRVSSGSFSTVASAKSVASDPDQLKSAREDIKELLNTKFCHPILVRLGWHDAGTYNKNIEEWPQRGGANGSLRFEIELKHGANAGLVNALKLLQPIKDKYSAVTYADLFQLASATAIEEAGGPKIPMKYGRMDVSVPEQCPEEGRLPDAGPPSPAAHLRDVFYRMGLNDKEIVALSGAHTLGRSRPERSGWGKPETKYTKDGPGAPGGQSWTVQWLKFDNSYFKDIKEKRDNDLLVLPTDAVLFEDPSFKEYAEKYAVDQDAFFKDYAEAHASLSNLGAKFDPPQGFSI	At4g08390	NP_001293099.1	13	76	7	5.7	0.0367566	5	3	5	3	8	21.2.1	redox.ascorbate and glutathione	Cp	67	1	Cp	Cp	Cp	Cp	94.1	plastid stroma mitochondria	mitochondrion plastid	-
	Solyc11g018550	tAPX6	Thylakoid-bound ascorbate peroxidase 6	MTSLTGATSHLLPSATIAATSASTTARLAISFSSSSSSSLKRIRSSPLLPHIFRYQKRSLIGTTSSGRFSTFASPKCAASDPDQLKSAREDIKELLKTTSCHPILVRLGWHDAGTYNKNIEDWPQRGGANGSLRFEVELKHGANAGLVNALKLLQPIKDKYAGVTYADLFQLASATAIEEAGGPKIPMKYGRIDVSGPDECPEEGRLPDAGPPNPSSHLRDVFYRMGLNDKEIVALSGAHTLGRSRPERSGWGKPETRYTKDGPGSPGGQSWTVQWLKFDNSYFKDIKEQRDEDLLVLPTDAVLFEDSSFKEYAEKYAVNQDVFFKDYAEAHAKLSNLGAKFDPPEGFSIDNNPTQVQPEKFVAAKYSTGKRELSDAMKQKIRAEYEGLGGTPDKPLPT…	At1g77490	NP_001234631.2 Najami et al 2008	10	52	4	3.062	0.0197454	3	2	3	2	5	21.2.1	redox.ascorbate and glutathione	Cp	76	1	Cp	Cp	Cp	Cp	63.2	thylakoid-integral	plastid	plastid
	Solyc08g059760	APX6	L-ascorbate peroxidase 6	MSNTVAVDCWLLSSGVSSFTSTSKLYFPANFSRKPRFGSNTIRASATTNGSSEGVIYKALLCGRRALLSMITLPLVMPCERIDNSVGAIAADESFQVREEIRKVLSKSKAAGVLRLVFHDAGTFEIDEKTGGMNGSIVYELDRPENKGLKKSLKILDKAKSQIDLVQSVSWADIIALAGAEAVSLCGGPSIPIQLGRIDSMVQDPEGKLPEESLDAISLKQCFERKGFSTQELVALSGAHTLGSKGFGNPTVFDNEYFKILMEKPWLSSGSMTSMVGLPSDRALVEDDECVGWISKYAEDQSLFFDDFKNAYTKLVDTGATWKKAL	At4g32320	XP_010324971.1	7	12	7	2.652	0.0171015	5	2	5	2	7	26.12	misc.peroxidases	Cp	43	2	Cp	possibly Cp	Cp	C	92.6	-	cytosol	-
	Solyc04g074640	TL29	Thylakoid lumenal 29 kDa protein, chloroplastic-like [Solanum lycopersicum]; L-ascorbate peroxidase (AHRD V1 ***- A8JG56_CHLRE); contains Interpro domain(s) IPR002207 Plant ascorbate peroxidase	MVSFASTLPSLVSFIPSPSSITNASRNPPQPGMICCKFGSELNNEDRFHrRNADILQSVGAAVGMDLIARSSAFIEVANAADLIQrRNAQRSDFQSKIKLTLYDAIKANPDIIPSLLTLALNDAITYDKATKTGGPNGSIRFSSEISRPENKGLDAALNLLEESKKVIDLDSKGGPISYADLIQFAAQSAVKSTFIASAISKCGGNVEKGTLLYSAYGSNGQWGQFDRIFGRSDAQEPDPEGRVPQWDKASVQEMKDKFKAVGLGPRQLAVMSSFLGPDQAATEALLVSDPEVLPWIQKYQRSRETVSRTDYEVDLITTVTKLSSLGQVINYEAYTYPPRKIDVTKLKL	At4g09010	XP_004237942.1	8	34	8	2.594	0.0167275	5	3	5	3	8	21.2.1	redox.ascorbate and glutathione	Cp	35	3	Cp	Cp	Cp	Cp	100	thylakoid-peripheral-lumenal-side	plastid	-
	Solyc08g081010	GSH1	Glutamate-cysteine ligase (AHRD V1 **** Q7Y0R4_BRAJU); contains Interpro domain(s) IPR011556 Glutamate--cysteine ligase, plant	MALMSQAGSSHCIYSEKVRCISGHRSIINNMDMFRMREICFGVDISSRNASRRVQGNYLNHIGVGSRRGDLTIVAASPPTEDAVVAAEPLTKEDLVGYLASGCKSKEKWRIGtheEKFGFEFGTLRPMKYDQIADLLNGIAERFDWEKVMEGDKIIGLKQGKQSISLEPGGQFELSGAPLETLHQTCAEVNSHLYQVKAVAEEMGIGFLGTGFQPKWGLKDIPIMPKGRYEIMRNYMPKVGSLGLDMMFRTCTVQVNLDFSSEADMIRKFRAGLALQPIATALFANSPFTEGKPNGYLSKRSHIWTDTDNNRAGMLPFVFDDSFGFEQYVDYALDVPMYFVYRKKKYVDCTGLSFRDFMNGKLPPIPGEYPTLNDWENHLTTIFPEVRLKRYLEMRGAD…	At4g23100	XP_025888058.1	12	70	12	9	0.0580367	5	3	5	3	8	21.2.2	redox.ascorbate and glutathione	Cp	14	4	-	Cp	Cp	C	83	plastid stroma	plastid	plastid
	Solyc01g098610	GSH2	Glutathione synthetase (AHRD V1 **** Q6F4I7_ZINEL); contains Interpro domain(s) IPR005615 Glutathione synthase, eukaryotic	MGSGCSSPSISLTTIATSHFQSQESLSNSLNFYSPTRFLEPHLLKSSKIFIPKSPLKCAKVPEMQTQLEDSAKPIVNDPHDIDSKLVQKLANDALVWCSLRGLLVGDRNSERSGTIPGVDMVHAPVALIPMSFPESHWKQACEVAPIFNELVDRVSQDGEFLQQSLSRTRKADPFTSRLLEIHSKMLEINKLEEIRLGLHRSDYMLDEQTKLLLQIELNTISSSFPGLSCLVSELHRSLLQQYREDIASDPNRIPANNAVNQFAEALAKAWNEYGDPRAVIIFVVQAEERNMYDQHWLSASLRERHQVTTIRKTLAEIDALGELQQDGTLVVDGQAVAVIYFRAGYAPSDYHSESEWKARLLMEQSRAVKCPSISYHLAGSKKIQQELAKPNVLERFLE…	At5g27380	NP_001234014.2	9	29	9	1.683	0.0108529	5	0	5	0	5	21.2.2	redox.ascorbate and glutathione	Cp	22	2	Cp	possibly Cp	Cp	Cp	100	cytosol plastid stroma	plastid cytosol	-
	Solyc09g065900	GR2	Glutathione reductase (AHRD V1 ***- B9IED0_POPTR); contains Interpro domain(s) IPR006324 Glutathione reductase, plant	MATSLSSPKLSTTLSSPTFHSLYKTKFSNFSLLSLSNPIKPLRFNFLSHTRTSSLSYGrRNAFTTPRAESSNGAETPRHYDFDLFTIGAGSGGVRASRFASNFGASVAVCELPFSTISSDSTGGVGGTCVLRGCVPKKLLVYASKYSHEFEESCGFGWNYEAEPKHDWSTLIANKNAELQRLTGIYKNILKNADVTLIEGRGKVVDPHTVDVDGKLYSAKNILISVGGRPFIPDIPGSEYAIDSDAALDLPTKPDKIAIVGGGYIALEFAGIFNGLKSEVHVFIRQKKVLRGFDEEIRDFVGEQMSLRGIEFHTEESPQAIVKSADGSLSIKTNRGTVEGFSHIMFATGRSPNTKNLGLDTVGVKMTKNGAIEVDEYSRTSVPSIWAVGDVTDRINLTP…	At3g54660	NP_001234243.2	18	142	18	8.237	0.0531164	5	3	5	3	8	21.2.2	redox.ascorbate and glutathione	Cp	65	1	Cp	Cp	Cp	Cp	99.9	plastid stroma	plastid	plastid
	Solyc05g054940	NLP1	Deaminated glutathione amidase, chloroplastic/cytosolic, Nitrilase 2 like protein (AHRD V1 **** Q9LE50_ARATH); contains Interpro domain(s) IPR003010 Nitrilase/cyanide hydratase and apolipoprotein N-acyltransferase	MANSVRIAAAQMTSVNNLAVNFGTCSRLVKEAASAGAKLLCFPENFSFVGDLEGESLKIAEPLDGPIMKGYCSLARESNIWLSLGGFQEKGSDNAHLRNTHVLIDDNGNIRSTYSKMHLFDVDVPGGAVYKESSFTEAGKDIVVVDSPFGRLGVTVCYDLRFPELYQQLRFNHDAQVLLVPAAFTTVTGQAHWEILLRARAIETQCYVIAAAQAGKHNDKRESYGDTLIIDPWGTIVGRLSDRSSTGITVADIDFSLIDSVRAKMPVCKHRKPAEFWNQSV	At4g08790	XP_004239753.1	3	6	3	0.334	0.00215381	5	2	5	2	7	26.8	misc.nitrilases, *nitrile lyases, berberine bridge enzymes, reticuline oxidases, troponine reductases	S	-	5	Cp	possibly Cp	Cp	C	69	-	plastid	-
A Proteins were identified by acetone preparations and/or the gel method. For emPAI and Mol% calculations, only the data from the acetone prepartions were used. Proteins identified solely by the gel method have data for the number of peptides, PSMs and unique peptides.
B Names of tomato proteins were based on the literature, NCBI annotation (identified in BlastP searches), and/or SolyGenomics descriptor. In a small number of cases, tomato protein names were assigned based on NCBI annotations and the Arabidopsis homolog.
C Some Sol Genomics descriptors were updated when NCBI annotations and Arabidopsis gene annotations were aligned.
D Target P's subcellular locations are: chloroplast (Cp), mitochondria (M), secretory (S), and no predicted location is indicated by a dash (-).
E ChloroP was used to predict the presence of a chloroplast transit peptide (Y) and the lack of a predicted transit peptide is indicated with a dash (-).
F Predotar's predicted subcellular locations were: chloroplast/plastid (Cp),endoplasmic reticulum (ER) or mitochondrion (M). For proteins with localization predictions that were less clear, Predotar provided categorized of possibly Cp, M and ER. Proteins with unresolved locations or that did not have a homolog detected by Predotar are indicated with a dash (-).
G WoLF PSORT's and YLoc's predicted subcellular locations were: chloroplast/plastid (Cp), cytosol (C), cytoskeleton (Cy), endoplasmic reticulum (ER), extracellular (EX), golgi apparatus (G), mitochondrion (M), nucleus (N), peroxisomes (P), plasma membrance (PM), and vacuole (V). Proteins with no chloroplast location in WoLF PSORT are indicated by not Cp.The number of proteins predicted to be in t…
