# Supplementary material for: The tomato chloroplast stromal proteome compendium elucidated by leveraging a plastid protein-localization prediction Atlas
Source: Front Plant Sci. 2023 Aug 28;14:1020275. doi: 10.3389/fpls.2023.1020275 (PMC10493611; doi:10.3389/fpls.2023.1020275)
Supplement: Supplementary file 12 [file Table_10.xlsx]

## Sheet: Table S10A-Translation 
Table S10A. Translation
Gene and protein descriptors							ProteomicsA								Algorithms								Databases
Category	Tomato Gene ID	Gene nameB	DescriptionC	Protein Sequence	Arabidopis homolog	Tomato proteinB NCBI accession	Peptides	PSMs	Unique Peptides	emPAI	Mol%	Acetone samples	Gel samples	Total	TargetP D ver.1	Transit peptide length	TargetP (reliability class)	ChloroP E	Predotar F	WoLF PSORT G	YLoc G	YLoc % Confidence	PPDB	SUBA4	plprot
50S ribosomal proteins	Solyc01g087730	RPL1	50S ribosomal protein L1 (AHRD V1 ***- A8YGI8_MICAE); contains Interpro domain(s) IPR005878 Ribosomal protein L1, bacterial-type	MASTATPSTLTLSSIFSQELNPNSLIFKSKPLLFTSHKSFSLHPLSLQYKERKNGPLVVAAMAAEAEVEDAVEQEGEEGAVAVLIPPSKPKKGKAALPLKRDRTRSKRFLEIQKLREIKKEYDLKTAIELLKQTASLKFVETAEAHFRLNIDPKYNDQQLRATVNLPKGTGQTVKVAVLTQGEKFDEAKNAGADIVGGEDLIEQIKGGFMEFDKLIATPDMMPKVASLGRVLGPRGLMPNPKAGTVTTNIPQAIEEFKKGKVEYRADKTGIVHLPFGKANFSEEDLIINFIAAVKSVEANKPSGAKGVYWKSAHVCSSMGPSIRLNVREMLEYKLPNA	At3g63490	XP_004229660.1	10	38	10	3.489	0.0224989	5	3	8	Cp	59	2	Cp	possibly Cp	Cp	Cp	99.6	plastid ribosome	plastid	plastid
	544163654	RPL2	50S ribosomal protein L2 (chloroplast) [Solanum lycopersicum]	MAIHLYKTSTPSTRNGTVDSQVKSNPRNNLIYGQrRNACGKGRNARGIITARHRGGGHKRLYRKIDFrRNANEKDIYGRIVTIEYDPNRNAYICLIHYGDGEKRYILHPRGAIIGDTIVSGTEVPIKMGNALPLTDMPLGTAIHNIEITLGKGGQLARAAGAVAKLIAKEGKSATLKLPSGEVRLISKNCSATVGQVGNVGVNQKSLgranaGSKRWLGKRPVVRGVVMNPVNADHPHGGGEgranaPIGRKKPTTPWGYPALGrRNASRKRNKYSDNLILrRNARSK	Atcg01310	YP_008563130.1	7	40	6	5.494	0.0354282	5	0	5	-	-	-	-	-	-	-	-	plastid ribosome	plastid	-
	Solyc06g051200	RPL3	50S ribosomal protein L3 (AHRD V1 ***- D7LJX0_ARALY); contains Interpro domain(s) IPR019927 Ribosomal protein L3, bacterial/organelle-type	MSLSSFSTMPTAKLRLQTLPTSTTVTPLTLHSPFLPSFRLPKHKPLSILRISTSPAISASLEAGVGIMATKLGMMSFFEDSGTVVPVTVVGFREGNIITQIKTEATDGYSAVQVGYrRNAVRDRKLTKPEMGHLEKSGIIPLRHLQEFRLQSVDGFEVTQKLDFNELFKEGDLVDVAGTTIGKGFQGGIKRHNFKRGQMTHGSKSHRQLGSIGAGTTPGRVYKGKKMPGRMGGTRTKIRKLKIVKIDDELKILMIKGALPGKPGNLLRIAPAKIVGKNIPKN	At2g43030	XP_004240919.1	10	57	10	10.659	0.0687348	5	2	7	Cp	58	2	Cp	Cp	Cp	Cp	65	plastid ribosome	plastid	plastid
	Solyc07g061900	RPL4	50S ribosomal protein L4 (AHRD V1 ***- B6TG27_MAIZE); contains Interpro domain(s) IPR015498 Ribosomal protein L4	MATSSSLSFFSSTIFFSNSNTLHSSKQQQQKQLIFKPKQQQFSIRSEAAAATIPILSFDGTEVGSTTLNLKSAPLDTARAVVHRGLTTDLRNQrRNAGTASTLTRAQVRGGGIKPYPQKKTgranarRNAGSNRTPLRPGGGVVFGPKPKDWSVKINKKEKRLAISTALSSATQNAIVVEEFDDKFEKPKTKEFIDLMrRNAWGLDPKEKSLFLMTEVSDNVILSSRNISTLKMLTPRTLNLFDILDSEKLVFTKSAVEFLNERYGNDDDDDDDWEVVDEEEEDGGEVEESAESSE	At1g07320	XP_004244314.1	8	37	8	7.377	0.0475707	5	1	6	Cp	45	3	Cp	Cp	Cp	Cp	95.2	plastid ribosome	plastid	plastid
	Solyc09g007560	RPL5	50S ribosomal protein L5 (AHRD V1 ***- B5TV71_CAMSI); contains Interpro domain(s) IPR002132 Ribosomal protein L5	MAASPLLLHSTASSFYNAEFPAYSVRLPVGNTKVRSSNKLTVKASATVLVDKSEAEKVNRLKTNYLEKIVPLLKEEFSYTNILQVPKVEKIVVNCGIGDAAQNSKGLDAAMNDLALITGQRPVKTRAKNAIATFKIREGQPLGIAVTLRGNVMYSFLDRLINLGLPRTRDFQGVNPNSFDGHGNYSIGFREQSVFPELSYDALGKPRGMDVCITTTAETDKEAHRLLALMGMPFREGSGGQTTFTKKKKLRAHHFDSKAKQRSrRNA	At4g01310	XP_004246669.1	6	25	6	3.217	0.0207449	5	3	8	Cp	35	3	Cp	Cp	Cp	Cp	95.6	plastid ribosome	plastid	plastid
	Solyc12g100160	RPL6	50S ribosomal protein L6 (AHRD V1 ***- B6SL57_MAIZE); contains Interpro domain(s) IPR019906 Ribosomal protein L6, subgroup	MCKAKRALSTIQDSSALKRLSLVACRQNSKMSSSSLTASLHASTLRSPFVGSLNGFHVSSVAVRRVGFVSKTVECKESRIGKQPISVPSNVTLTMEGQDLKVKGPLGEMAITYPREVKLEKEDGGILRVRKAMETRRANQMHGLFRTLTDNMVVGVSKGFEKKLQLVGVGYRATIEGKDIVLNLGFSHPVRMEVPAGLQVKVEENTRITVSGYDKSEIGQFAASIRKWRPPEPYKGKGVKYADEIVRRKEGKAGKKK	At1g05190	NP_001353482.1	11	26	11	7.799	0.050292	3	1	4	Cp	59	4	Cp	possibly M	Cp	M	94.7	plastid ribosome	plastid	plastid
	Solyc11g066410	RPL9	50S ribosomal protein L9 (AHRD V1 ***- B4FU53_MAIZE); contains Interpro domain(s) IPR000244 Ribosomal protein L9	MASWGSSSCLQNYSLTKNPFSETVKFSERTSILTIVAQKKAKKVRKIILKEDISQLGKKGDLLDVKAGFFRNYLLPLGKAQIVTAALIKEMKMEDEKIEAEKQRVKDEAQQLARIFETIGAFKVKRKGGKGKQIFGSVTAQDLVDIIKAQIQRDVDKKIVNLPEIRETGEYVAELKLHPEVTARVRLTVYAN	At3g44890	XP_004250984.1	11	20	11	6.197	0.0399615	4	3	7	Cp	25	5	-	Cp	Cp	Cp	99.9	plastid ribosome	plastid	plastid
	Solyc04g009540	RPL10	50S ribosomal protein L10 (AHRD V1 ***- B6SUJ0_MAIZE); contains Interpro domain(s) IPR001790 Ribosomal protein L10	MEAALFSLPSSSSHSYPFSVKSHFNNPFIIPHSSSHLKLKPRTLTIRSAISRTKKEETVETVKQQLEDCYLLAGISYKGLTVKQFQDLRAQLPETTKLLVAKNTLVLKAIEGTKWEALKPCMKGMNAWLFVHSEEIPAALKPYRTFLREKKLEDNDFTGGVFEGKFYGPDEFKVLENLPTRAEIYSQLLGSLKGPASAVVGTIQAPARNLVMVLKAYVKKLEEEEGGSQ	At5g13510	XP_004236817.1	9	31	9	3.642	0.0234855	4	1	5	Cp	47	1	Cp	Cp	Cp	Cp	98.9	plastid ribosome	plastid	plastid
	Solyc08g083350	RPL11	50S ribosomal protein L11 (AHRD V1 ***- B6U1J2_MAIZE); contains Interpro domain(s) IPR006519 Ribosomal protein L11, bacterial-type	MASLSSCNHPGKLCSSFSPSSLKLSWVQRVSVQFIHTQNHTCSLPYAPRALTVISMAPPKPGGGKAKKVTGIIKLALEAGKATPAPPVGPALGSKGVNIMAFCKDYNARTADKAGYVIPVEITVYDDRSFTFILKTPPASVLLLKAAGVEKGSKDPQREKVGKITIDQLKVIAQEKLPDLNCSTIESAMRIIAGTAANMGIDIDPPILEPKKKELVY	At1g32990	XP_004245441.1	5	14	5	1.512	0.00975016	5	0	5	Cp	49	3	Cp	Cp	Cp	Cp	92.3	plastid ribosome	plastid	plastid
	Solyc02g086740	RPL12-A	50S ribosomal protein L12-A (AHRD V1 ***- Q8LBJ7_ARATH); contains Interpro domain(s) IPR015608 Ribosomal protein L12, chloroplast	MASTLSTIALCSPSHISPSTHASISFPTKTLQLPIRTSKLHHrRNAATFVRPLAAVEAPEKVVQLGDEISTLTLADAQKLVEYLQDKLGVSAASFAPAAVVAAPGGAAADAPAVVEEKTEFDVVIDEVPSNARIATIKAVRALTSLALKEAKELIEGLPKKFKEGVSKDEAEDAKKQLEEAGAKVSIA	At3g27830	XP_004232303.1	11	87	1	99	0.638403	4	3	7	Cp	51	1	Cp	Cp	Cp	Cp	99.8	plastid ribosome	plastid	plastid
	Solyc02g086730	RPL12-C	50S ribosomal protein L12-C (AHRD V1 ***- Q8LBJ7_ARATH); contains Interpro domain(s) IPR015608 Ribosomal protein L12, chloroplast	MASTLSTITLRSPSPISPATASSTHASISFPTKTLELPIRTPKLYHrRNAATLVRPLAAVEAPEKVVQLGDEISNLTLADAQKLVEYLQDKLGVSAASFAPAAVVASPGGAAADAPAVVEEKTEFDVVIDEVPSNARIATIKAVRALTSLALKEAKELIEGLPKKFKEGVSKDEAEDAKKQLEEAGAKVSIA	At3g27830	XP_010316288.1	11	83	1	62.096	0.400427	4	3	7	Cp	55	1	Cp	Cp	Cp	Cp	99.6	plastid	plastid	-
	Solyc07g062190	RPL13	50S ribosomal protein L13 (AHRD V1 ***- B6SVH3_MAIZE); contains Interpro domain(s) IPR005823 Ribosomal protein L13, bacterial-type	MAVQCSSSVIFASHSPAKTLSSSQNKTLFLGFSISSKPSVVVAKTHRATQISCQEKTALVPLEQRWMFEESEINGPDIWNETWYPKGANADHVNTDKPWYIVDATDKILGRLASTIAIHIRGKNLATYTPSVDMGAFVIVVNAEKVAVSGKKRSQKLYrRNAHSGRPGGMTVETFDQLQQRIPERILEHAVRGMLPKGRLGRQLFNHLKVYEGPNADHPHDAQKPIELPIRDKRIQKQR	At1g78630	XP_004244291.1	4	9	3	2.594	0.0167275	3	1	4	Cp	52	1	Cp	Cp	Cp	Cp	88.8	plastid ribosome	plastid	plastid
	Solyc12g014390	RPL13	50S ribosomal protein L13 (AHRD V1 ***- B6SVH3_MAIZE); contains Interpro domain(s) IPR005823 Ribosomal protein L13, bacterial-type	MAVHYYCSLMFTCPSPKSLSNKTPFLGFSMAAPSSLTFSGNNRTAQIRCQDKAAYIPLDQRWMFEESEIDGPDIWNETWYPKAANADHVNTDKPWYIIDASDKILGRMASTIAIHMRGKNLATYTPSVDMGAFVIVVNAEKVVVSGKKRSQKLYrRNAHSGRPGGMTVETFDQLQQRIPERIIEHAVRGMLPKGRLGRQLFTHLKVYKGPEHPHEAQKPVELPIRDKRIQKQR	At1g78630	NP_001310974.1	4	10	3	9	0.0580367	3	0	3	Cp	48	2	Cp	Cp	Cp	Cp	99.3	plastid ribosome	plastid	plastid
	544163649	RPL14	50S ribosomal protein L14 (chloroplast) [Solanum lycopersicum]	MIQPQTHLNVADNSGARELMCIRIIGASNrRNAYAHIGDVIVAVIKEAVPNMPLERSEVVRAVIVRTCKELKRDNGMIIRYDDNAAVVIDQEGNPKGTRIFGAIARELRELNFTKIVSLAPEVL	Atcg00780	YP_008563125.1	7	40	7	14.849	0.0957541	5	3	8	-	-	-	-	-	-	-	-	plastid ribosome	plastid	-
	Solyc05g009370	RPL15	50S ribosomal protein L15 (AHRD V1 *-*- B4B3P1_9CHRO); contains Interpro domain(s) IPR005749 Ribosomal protein L15, bacterial-type	MASLLSISSASPTRTNSIITQFSSSFKGNVSNLKSSSKLLPLIKVCNLKSKSITRTPFVVFNQTASFGADSATGSVRFRLNNLGPQPGATKNRKRKGRGHSAGQGGSCGFGMRGQKSRSGPGVRKGFEGGQMPLYrRNALPKLRGIAGGMHAGLPKYVPVNLKDIEEAGFQEGEEVSLESLKQKGLINPSGRErRNALPLKILGDGELSVKLNFKARAFSTSAKEKLEAAGCSLTVLPGRKKWVKPSVAKNLARAEEYFAKKRAAAAESADPSAA	At3g25920	XP_004238931.1	6	21	6	3.437	0.0221636	4	1	5	Cp	45	2	Cp	Cp	Cp	Cp	99.8	plastid ribosome	plastid	plastid
	544163650	RPL16	50S ribosomal protein L16 (chloroplast) [Solanum lycopersicum]	MLSPKRTRFRKQHRGRMKGISYRGNRISFGKYALQALEPAWITSRQIEAGrRNAAMTRNArRNAGGKIWVRIFPDKPVTLRPAETRMGSGKGSPEYWVAVVKPGRILYEMGGVTENIArRNAAISLAASKMPIRTQFIIS	Atcg00790	YP_008563126.1	4	18	4	9	0.0580367	3	0	3	-	-	-	-	-	-	-	-	plastid ribosome	plastid	-
	Solyc06g082750	RPL17	50S ribosomal protein L17 (AHRD V1 ***- B4FZB4_MAIZE); contains Interpro domain(s) IPR000456 Ribosomal protein L17	MASATWSMSCLKSALPTVQPISNSSLRFSSGSSPSRLRICKPKSSSTIIQSFVGLAPLHPLLSLSSQDSKSFEDSFTIIDSGGRVFAMRHGRKVPKLNRPPDQrRNAALLRGLTTQLLKHGRIKTTKARARAVRKYVDKMVTMAKDGSLHKrRNAQALGFIYEKQIVHALFAEVPERYGERNGGYTRIIRTLPrRNAGDNAPMAYIELV	At3g54210	XP_004242470.1	2	3	0	0.778	0.00501695	1	0	1	Cp	65	1	Cp	Cp	Cp	Cp	97.5	plastid ribosome	plastid	-
	Solyc12g098890	RPL18	50S ribosomal protein L18 (AHRD V1 ***- B6TYR5_MAIZE); contains Interpro domain(s) IPR004389 Ribosomal protein L18, bacterial	MSCASFSLSFLHNACGDSKKIDFQFRPKLVTPIRVLTVEAKAKTRREDRTARHIRIRKKVEGTPERPRMCVFRSNKHIYVQVIDDSKMHTLASASTMQKPISEEFDYSAGPTAEVAKKVGEVIAKACLEKGITKVAFDRGGYPYHGRIEALADAAREHGLQF	At1g48350	NP_001353313.1	5	13	5	3.642	0.0234855	5	2	7	Cp	39	2	-	-	not Cp	C	90.8	plastid ribosome	plastid	plastid
	Solyc08g078010	RPL19	50S ribosomal protein L19 (AHRD V1 *-*- B6T8M1_MAIZE); contains Interpro domain(s) IPR001857 Ribosomal protein L19	MGSVVLPQALFVVPRNPTRCTAPQKLAFSACVSRRPSQFNVPLFSASGLLSSKWENRSFIVRAEAESQEEPEAAEAEVEAEADAAVATEERPPFKPRAKLGDIMGILNKQAIEASDTVRPTPDIRTGDVVEIKLEVPENRKRLSIYKGIVISKQNAGIHTTIRIRRIIAGVGVEIVFPVYSPNIKELKVVKHRKVRRARLYYLRDKLPRLSTFK	At4g17560	NP_001353313.1	4	9	4	2.594	0.0167275	3	1	4	Cp	62	2	Cp	Cp	Cp	M	46.3	plastid ribosome	plastid	plastid
	544163636	RPL20	50S ribosomal protein L20 (chloroplast) [Solanum lycopersicum]	MTRIKRGYIArRNArRNATKIRLFASSFRGAHSRLTRTITQQKIRALVSAHRDRDRKKRDFrRNALWITRINAVIRERGVSYSYSRLIHDLYKRQLLLNRKILAQIAISNRNCLYMISNEIIKEVDWKESTRII	Atcg00660	YP_008563111.1	5	12	5	3.642	0.0234855	2	0	2	-	-	-	-	-	Cp	-	-	plastid ribosome	plastid	-
	Solyc06g065390	RPL21	50S ribosomal protein L21 (AHRD V1 *-*- B6U3Z0_MAIZE); contains Interpro domain(s) IPR001787 Ribosomal protein L21	MATLSLCSTSSPSTALSKNQTFLNTLSVPKANSNVTFLSHSFSSLNLRFSKPNSLSSFVPKYSESEAPVAEVEADQEEPVVEATSLEPKREEIFAVVMVGSRQYIVFPGRYIYTQRLKGANVNDKIILNKVLLVGTKTSTWVGKPVVPNATVHAVVEEQLKDKKVIVFKYKKKKNYrRNANIGHRQPITRIRIMGITGYQDSPAVTLADLEAAK	At1g35680	XP_004241824.1	2	5	2	0.668	0.00430761	3	2	5	Cp	69	1	Cp	Cp	Cp	Cp	99.9	plastid ribosome	plastid	plastid
	544163652	RPL22	50S ribosomal protein L22 (chloroplast) [Solanum lycopersicum]	MLKKKKTEVYALGEHISMSADKArRNAVIDQIRGRSYEETLMILELMPYRACYPILKLVYSAAANASYNMGSSETNLVISKAEVNEGTTVKKLKPRARGRSFPIKRSTCHITIVMKDISLDDEYGEMSSLKKTRWKKKSTAMTYRDMYNSGGLWDKK	Atcg00810	YP_008563128.1	3	7	3	4.995	0.0322103	1	0	1	-	-	-	-	-	-	-	-	plastid ribosome	plastid	-
	544163678	RPL23	50S ribosomal protein L23 (chloroplast) [Solanum lycopersicum]	MDGIKYAVFTDKSIRLLGKNQYTSNVESGSTRTEIKHWVELFFGVKVIAMNSHRLPGKSrRNAMGPIMGHTMHYrRNAMIITLQPGYSIPPLRKKRT	Atcg01300	YP_008563131.1	5	19	5	145.78	0.940065	2	0	2	-	-	-	-	-	-	-	-	plastid ribosome	plastid	-
	Solyc07g063960	RPL24	50S ribosomal protein L24 (AHRD V1 ***- B4FTJ3_MAIZE); contains Interpro domain(s) IPR003256 Ribosomal protein L24	MAALQSSFTGLSISSTSFFGQRFSPPLSLPLVKSAEGPCLITAKLKRWERKECKPNSLPVLHKMHVRLGDTVKVISGHDKGKIGEITEIIKHNSKIVVKEVNLKTKHVKSRSEEEPGQIVKIEAPIHSSNVMLYSKEQKVASRVGHKTLDNGKRVRYLIKTGEIIDSAENWKKAVKEKGKTTEAVAAAS	At5g54600	XP_004244164.1	4	13	4	2.511	0.0161922	3	0	3	Cp	33	2	Cp	Cp	Cp	Cp	100	plastid ribosome	plastid	-
	Solyc11g068820	RPL27	50S ribosomal protein L27 (AHRD V1 ***- Q8LEF5_ARATH); contains Interpro domain(s) IPR001684 Ribosomal protein L27	MADISLIFLSRRFCHCGSIIPSMAVSLSLVSSFKGLSLSSNSLLGVSLPIAPKFSVSFPLKSPLTIESAHKKGAGSTKNGRDSPGQRLGVKIYGDQVAKPGSIIVRQRGTKFHPGKNVGLGKNADHTIFSLIDGLVKFEKFGPDRKKISVYPREVQPENPNSYRNRKRESFRLQRERRKARREGVIPEPQLIVASAAESSEDNPITTC	At5g40950	NP_001316317.1	2	11	2	1.31	0.00844756	3	0	3	Cp	67	3	Cp	Cp	Cp	V	53.3	plastid ribosome	plastid	plastid
	Solyc09g090410	RPL28	50S ribosomal protein L28 (AHRD V1 ***- B6TFW5_MAIZE); contains Interpro domain(s) IPR001383 Ribosomal protein L28	MATITAGISLRGPVVGGYRTFAVTKRALPKVKFSSELSFVTSQLSGIKISSTHLSSPASLSVPFKTALQPVARRVCPFTGKKSNRANKVSHSNHKTKKLQFVNLQYKRIWWEEGKRFVKLRLSTKAIKTIEKNGLDAVAKKAGIDLSKK	At2g33450	XP_004247753.1	3	9	3	1.154	0.00744159	3	0	3	Cp	11	4	Cp	possibly Cp	Cp	Cp	99	plastid ribosome	plastid	-
	Solyc06g072470	RPL29B	50S ribosomal protein L29 (AHRD V1 ***- B6TS58_MAIZE); contains Interpro domain(s) IPR001854 Ribosomal protein L29	MMSLSIASPSGVTFTSKMNLSKSSFHGIQIPKIMQARAVNAPPHSCSSLVVKMAKREEELKEIRTKTTEELQEEIVDLKGELFMLRLQRSARNEFKSSEFLRMRKRIARMLTVKREREVEEGINKRISRKLDRKWKKSIVPRPPPSLKKLREEEAAEEAKESAS	At5g65220	XP_004241462.1	9	23	2	15.681	0.101119	5	0	5	Cp	51	2	Cp	Cp	Cp	Cp	66.4	plastid ribosome	plastid	plastid
	Solyc03g097950	RLP29A	50S ribosomal protein L29 (AHRD V1 ***- B6TS58_MAIZE); contains Interpro domain(s) IPR001854 Ribosomal protein L29	MMSLSIATPPSSVNFASKLNLSKSSFHGVRIAQVCPVHARSAHSIATTRSSSLMVVNMAKRDDELKEIRTKTTEELQEEIVDLKGELFMLRLQRSARNEFKSSEFLRMRKRIARMLTVKREREMEEGINKRISRKLDRKWKKSIVPRPPPSLKKLREEEAAEEAKESA	AT5G65220	XP_004235356.1	1	1	0	-	0	0	1	1	Cp	na	1	Cp	Cp	Cp	Cp	90.9	plastid ribosome	plastid	plastid
	Solyc04g080630	RPL31	50S ribosomal protein L31 (AHRD V1 ***- A5AHS8_VITVI); contains Interpro domain(s) IPR002150 Ribosomal protein L31	MALTLSNTFLQKNVAPPSFSSKKMGIGSNQMRWSCRKKDIHPQFYDDAKVYCNGEHVMTTGGTKNEYTVDVWSGNHPFYQGSRSQLLLDADQVEKFRKKFSGLTQIMQIPTLKGEIVLPPKKKKPTKKK	At1g75350	XP_004238298.1	4	13	4	6.499	0.0419089	2	0	2	Cp	45	4	-	Cp	Cp	C	92	plastid ribosome	plastid	plastid
	544163662	RPL32	Ribosomal protein L32 (chloroplast) [Solanum lycopersicum]	MAVPKKRTSTSKKRIRKNIWKRKGYWVALKAFSLAKSLSTGNSKSFFVRQTKINK	AtCg01020	YP_008563137.1	1	3	1	1.154	0.00744159	1	0	1	-	-	-	-	-	-	Cp	2	plastid ribosome	plastid	-
	544163634	RPL33	50S ribosomal protein L33 (chloroplast) [Solanum lycopersicum]	MAKGKDVRVTVILECTSCVRNSVDKVSRGISRYITQKNRHNTPNRFELKKFCPYCYKHTIHGEIKK	Atcg00640	YP_008563109.1	1	1	1	0.778	0.00501695	1	0	1	-	-	-	-	-	not Cp	-	-	plastid ribosome	plastid	-
	Solyc07g064690	RPL34	50S ribosomal protein L34	MACVPNSSMTLLFVEMGVGYDQHGQDVTSAAMRACKSAISSNSIPAFRRGSIPGVSFEQMKLQIKLGVPRPLHHTLDLEKVKSVFPYGRISNVEVVDGGLICSSGVQVEEMGDKNDDCYIVNAAVYVGY	At1g29040	XP_004244108.1	1	2	1	1.512	0.00975016	1	0	1	-	-	5	-	-	not Cp	Cp	88.1	plastid stroma	plastid	-
	Solyc07g006000	RPL35	50S ribosomal protein L35 (AHRD V1 *-*- D7LGR4_ARALY); contains Interpro domain(s) IPR001706 Ribosomal protein L35	MTLTMASSSSTSLFSTVLNFSPRKSTGFTCRTSVNIPSIAKKTSLSLSSSSNISSFAPIVFEKVSVAATPTNGNSKTLTVECHKGYKMKTHKASAKRFKVSGSGKIMrRNARAGKQHLLRKKNTKRKNRLSKTVQVDRSDYNNVignaALPYLKVNRAK	At2g24090	XP_004242623.1	1	2	1	0.931	0.00600357	1	0	1	Cp	66	1	Cp	Cp	Cp	Cp	100	plastid ribosome	plastid	-
30S ribosome subunits	Solyc01g057830	RPS1A	30S ribosomal protein S1 (AHRD V1 **-- B4FUZ5_MAIZE); contains Interpro domain(s) IPR003029 Ribosomal protein S1, R binding domain	MASLTQQFVGLKCPPMSTTRLVNPSNYHHHQSKQKPRIVIQAAAVIANAQTRERLKLKEMFEDAYERCRTTPMEGVAFTVDDFHSALEKYDFDSEVGTKVKGTVFSVDANGALVDITAKSSAYLPLREASLHTIRHVEEAGIFPGLREEFVVVGENEADDSLVLSLRSIQYDLAWERCRQLQAEDVVIKGKVVGANKGGVVALVEGLRGFVPFSQISTKSTAEELLEKELPLKFVEVDEEQSRLVLSNRKAMADSQAQLGIGSVVLGSVQSLKPYGAFIDIGGINGLLHVSQISHDRVSDIATVLQPGDTLKVMILSHDRERGRVSLSTKKLEPTPGDMIRNPKLVFEKAEEMAQTFRQRIAQAEAMARADMLRFQPESGLTLNSDGILGPLTSELPED…	At5g30510	XP_004229034.1	22	177	13	60.897	0.392695	5	3	8	Cp	41	4	Cp	Cp	Cp	Cp	94.7	plastid ribosome	plastid	plastid
	Solyc12g099110	RPS1B	30S ribosomal protein S1 (AHRD V1 **-- B4FUZ5_MAIZE); contains Interpro domain(s) IPR003029 Ribosomal protein S1, R binding domain	MGSLAHQFVGLKCSPISTTRIVQSKKNIVNPIIIVHRKQKIVSRAGAVATTNAETRERIKLKEMFEQAYERCRTAPMEGVAFTVEDFHSALEKYDFDSEMGTKVKGTVFSVDANGALVEITAKSSAYLPVQEASIHSIKHVEEAGIFPGFRDEFVVVGENEADDSVILSLRSIQYDLAWERCRQLQAEDVVVKGKVVSANKGGVVALVEGLRGFIPFSQIFSKSTAEELLEKELPLKFVEVDQEQTRLILSNRKAMADSQTQLGIGSVVLGIVQSLKPYGAFIDIGGVNGLLHVSQISHDRVSDISTILQPGDSLKVMILSHDRERGRVSLSTKKLEPTPGDMIRNPKLVFEKAEAMAQTFRQRIAQAEAMARADILKFQPESGLTLNSDGILGSLTSE…	At5g30510	NP_001333380.1	10	75	1	5.7	0.0367566	1	0	1	Cp	44	3	-	Cp	Cp	Cp	50.9	plastid ribosome	plastid	plastid
	544163602	RPS2	30S ribosomal protein S2 (chloroplast) [Solanum lycopersicum]	MTrRNAYWNINLEEMMEAGVHFGHGTRKWNPKMAPYISAKRKGIHITNLTRTARFLSEACDLVFDAASRGKQFLIVGTKNKAADSVEWAAIRARCHYVNKKWLGGMLTNWSTTETRLHKFRDLRMEQKTGRLNRLPKRDAAMLKRQLSRLQTYLGGIKYMTGVPDIVIIVDQHEEYTALRECITLGIPTICLTDTNCDPDLADISIPANDDAISSIRLILNKLVFAICEGRSSYIRNP	Atcg00160	YP_008563077.1	5	14	4	2.981	0.019223	5	2	7	-	-	-	-	-	-	-	-	plastid ribosome	plastid	-
	544163651	RPS3	30S ribosomal protein S3 (chloroplast) [Solanum lycopersicum]	MGQKINPLGFRLGTTQSHHSLWFSQPKNYSEGLQEDKKIRDCIKNYVQKNMRTSSGIEGIARIEIQKRIDLIQVIIFMGFPKLLIESRPRGIEELQMTLQKEFNCVNRKLNIAVTRIAKPYGNPNILAEFIAGQLKNRVSFRKAMKKAIELTEQADTKGIQIQIAGRIDGKEIARVEWIREGRVPLQTIRAKIDYCSYTVRTIYGILGIKIWIFLDEE	Atcg00800	YP_008563127.1	13	61	13	14.849	0.0957541	5	3	8	-	-	-	-	-	-	-	-	plastid ribosome	plastid	-
	544163615	RPS4	30S ribosomal protein S4 (chloroplast) [Solanum lycopersicum]	MSRYRGPRFKKIrRNALGALPGLTNKKPRTGSDLRNQSRSGKKSQYRIRLEEKQKLRFHYGLTERQLLKYVRIARKAKGSTGQVLLQLLEMRLDNILFRLGMASTIPAARQLVNHRHILVNGHIVDIPSYRCKPRDIITAKDEQKSRALIQISLDSSPHEELPNHLTLQPFQYKGLVNQIIDSKWVGLKINELLVVEYYSRQT	Atcg00380	YP_008563090.1	9	43	8	17.738	0.114384	5	3	8	-	-	-	-	-	-	-	-	plastid ribosome	plastid	-
	Solyc02g077990	RPS5	30S ribosomal protein S5 (AHRD V1 ***- B6TT32_MAIZE); contains Interpro domain(s) IPR005712 Ribosomal protein S5, bacterial-type	MAASSLSTFSSLSLRAPSRFSPFQSQPHHTFFIPKTIQSPFHLLLNPTKFDPIKPNSTTAETTFFDNTDPEEISTYDPPERPEDFIEPASFDDGPMESEEEIAKAYEELYGAAYSGETFLGNDIYAMDSKVKKTTSFGKTKKEKAKDGFDERVVQVrRNAVTKVVKGGKQLHFRAVVVVGDKKGQVGVGVGKAKEVIAAVQKSAVNArRNANLITVPMTKYLTFPHRSEGDFGAARVMLRPAAPGTGVIAGGAVRIVLEMAGVENALGKQLGSNNALNNARATVVAVQQMRQFSEVAQERGIPMEELWK	At2g33800	XP_004232896.1	12	66	12	9	0.0580367	5	3	8	Cp	56	3	Cp	Cp	Cp	Cp	100	plastid ribosome	plastid	plastid
	Solyc08g082690	RPS6	30S ribosomal protein S6 alpha (AHRD V1 *-*- D7DYF3_NOSA0); contains Interpro domain(s) IPR000529 Ribosomal protein S6	MASSSSSPSVLPSLTSTLSSSKPSIPFNFKGFTKRVNNSGQILKAQTLEFSGSFFEGGFGGGNADEPPTTPWSGISAVEDKEEPQCPPGLRPYETMVVLRPDMSEDERLALTQKYEELLVAGGGMYVEVFNRGVIPLAYSIrRNAKNKAGETNTYLDGIYLLFTYFTKPESIVALEATLVADDDVIRSSTFKIRKRKY	At1g64510	XP_004245494.1	1	4	1	1.154	0.00744159	4	3	7	Cp	35	2	Cp	Cp	Cp	Cp	100	plastid ribosome	plastid	plastid
	544163674	RPS7	30S ribosomal protein S7 (chloroplast) [Solanum lycopersicum]	MSrRNAGTAEKKTAKSDPIYRNRLVNMLVNRILKHGKKSLAYQIIYRAVKKIQQKTETNPLSVLRQAIRGVTPDITVKArRNAVGGSTHQVPIEIGSTQGKALAIRWLLAASRKRPGRNMAFKLSSELVDAAKGSGDAIRKKEETHRMAEANRAFAHFR	Atcg00900	YP_008563135.1	8	32	7	9	0.0580367	5	3	8	-	-	-	-	-	-	-	-	plastid ribosome	plastid	-
	544163648	RPS8	30S ribosomal protein S8 (chloroplast) [Solanum lycopersicum]	MGRDTIAEIITSIRNADMDRKRVVRIASTNITENIVQILLREGFIENVRKHRENNKYFLVLTLRHrRNANRKRPYRNILNLKRISRPGLRIYSNYQRIPRILGGMGIVILSTSRGIMTDREARLEGIGGEILCYIW	Atcg00770	YP_008563124.1	6	31	6	4.337	0.0279672	5	3	8	-	-	-	-	-	-	-	-	plastid ribosome	plastid	-
	Solyc04g079790	RPS9	30S ribosomal protein S9 (AHRD V1 *-*- B6SZ34_MAIZE); contains Interpro domain(s) IPR000754 Ribosomal protein S9	MAISVASLASSFASLSFSSQISQKPYAVSLAHSKQFSFSLASKISTLVVSASVAEAPETEELETRENLLKLVKSRLPGGFAAQPIFGTGrRNAKSASARVVLQEGSGKIIINYRDAKEYLQGNPLWIQYVKTPLATLGYEASYDIFVKVEGGGLSGQAQAISLGIARALLKVSESHRKPLREEGLLTRDARVVERKKVGLKKARKRPQFSKRWYLLTVAAFGRKIWWFIDPDWEKRAYQ	At1g74970	XP_004238213.1	6	55	6	7.254	0.0467776	5	3	8	Cp	50	5	Cp	Cp	Cp	Cp	99	plastid ribosome	plastid	plastid
	Solyc10g006030	RPS10	30S ribosomal protein S10-like (AHRD V1 ***- A1YMX4_BRACM); contains Interpro domain(s) IPR005731 Ribosomal protein S10, bacterial	MAISSSSLSAALFPMCNSSSISAQPKFSLLSLHSNSVKLQVFNQSRVSTTKVFASPEVLDAQNVEADVEDILAASTLSIGGDSDKAAPKQKIRIKLRSYWVPLIEDSCKQIMDAARTTNAKTVGPVPLPTKKRIYCVLKSPHVHKDARFHFEIRTHQRLIDILYPTAQTIDKLMLLDLPAGVDVEVKL	At3g13120	XP_004248372.1	3	8	3	0.995	0.00641628	5	2	7	Cp	60	2	Cp	Cp	Cp	Cp	99.9	plastid ribosome	plastid	-
	Solyc12g035860	RPS11	30S ribosomal protein S11 chloroplastic IPR001971 Ribosomal protein S11	MLYRILGRVGMDVLVHARVHVEYQRELFMFKQNFNNTIVIVIDVRGQVVSWSSAGALGFKGTRRGTPFASQTVAANTIRTIVDQGMQRAEFIIKGPRLKIDATL	Atcg00750	YP_008563121.1	1	3	1	-	0	0	1	1	M	54	4	-	possibly M	C	M	0.9893	plastid ribosome	plastid	-
	544163660	RPS12	30S ribosomal protein S12 (chloroplast) [Solanum lycopersicum]	MPTIKQLIRNTRQPIRNVTKSPALRGCPQrRNAGTCTRVYTITPKKPNSALRKVARVRLTSGFEITAYIPGIGHNSQEHSVVLVRGGRVKDLPGVRYHIVRGTLDAVGVKDRQQGRSKYGVKKPK	Atcg00905	YP_008563067.1	1	1	1	0.778	0.00501695	1	0	1	-	-	-	-	-	-	-	-	plastid ribosome	plastid	-
	Solyc05g005880	RPS13	30S ribosomal protein S13 (AHRD V1 ***- B6TG65_MAIZE); contains Interpro domain(s) IPR019980 Ribosomal protein S13, bacterial-type	MAQTLATPVLPSLSLICNTSSISKHSSLSFSTPTSFPKTAGLVIKCVRVGGVEVPNNKRVEFSLQYIHGIGRTTARQILVDLQMENKVMKDMSEEELITLREEVSKYMIEGDLrRNAFNALAIrRNALKEIQCYRGVRHIQGLPCRGQRTKNNCRTLKGKKVAIAGKKKAPR	At5g14320	NP_001316443.1	8	66	8	22.101	0.142519	5	3	8	Cp	45	1	Cp	Cp	Cp	Cp	100	plastid ribosome	plastid	plastid
	544163611	RPS14	30S ribosomal protein S14 (chloroplast) [Solanum lycopersicum]	MARKSLIQREKKRQKLEQKYHSIrRNASSKKEISKVPSLSDKWEIYGKLQSLPRNSAPTRLHrRNACFLTGRPRANYRDFGLSGHILREMVHACLLPGATRSSW	Atcg00330	YP_008563086.1	3	26	3	6.197	0.0399615	5	3	8	-	-	-	-	-	-	-	-	plastid ribosome	plastid	-
	544163671	RPS15	30S ribosomal protein S15 (chloroplast) [Solanum lycopersicum]	MVKNSVISVISQEEKKGSVEFQVFNFTNKIrRNALTSHLELHKKDYLSQRGLKKILGKRQRLLAYLAKKNRVRYKELINRLDIRETKTR	Atcg01120	YP_008563146.1	10	26	10	629.957	4.06229	5	0	5	-	-	-	-	-	-	-	-	plastid ribosome	plastid	-
	544163595	RPS16	30S ribosomal protein S16 (chloroplast) [Solanum lycopersicum]	MVKLRLKRCGRKQRAVYRIVAIDVRSrRNAEGKDLQKVGFYDPIKNQTYLNVPAILYFLEKGAQPTETVQDILKKAEVFKELRLNQPKFN	Atcg00050	YP_008563070.1	5	14	5	30.623	0.197473	5	2	7	-	-	-	-	-	-	-	-	plastid ribosome	-	-
	Solyc03g120630	RPS17	30S ribosomal protein S17 (AHRD V1 *-*- D8JV24_HYPDA); contains Interpro domain(s) IPR019984 Ribosomal protein S17, bacterial-type	MSVTSPLLSQFKSLTISTPFLHGSSSLSRLSTPSSSITSQKPSPPAFLPPIRAMRSMQGRVVCSTNDKTVSVEVTRLAPHPKYKrRNAVRKKKKYQAHDPLNQFQVGDYVQLEKSRPISKTKTFVAIPVPPRNQTKVKEEENQELGLPLESLQTSSVLEF	At1g79850	XP_004235675.1	2	8	2	0.931	0.00600357	4	2	6	Cp	52	1	Cp	Cp	Cp	Cp	96.2	plastid ribosome	plastid	plastid
	544163635	RPS18	30S ribosomal protein S18 (chloroplast) [Solanum lycopersicum]	MDKSKRPFLKFKRSFrRNARLPPIQSGDRIDYRNMSLISRFISEQGKILSrRNAVNRLTLKQQRLITLAIKQARILSLLPFLNNEKQFERTESTARTTGFKARNK	Atcg00650	YP_008563110.1	3	18	3	2.162	0.0139417	5	3	8	-	-	-	-	-	-	-	-	plastid ribosome	plastid	-
	544163653	RPS19	30S ribosomal protein S19 (chloroplast) [Solanum lycopersicum]	MTRSLKKNPFVANHLLKKIDKLNTKAEKEIIVTWSRASTIIPTMIGHTIAIHNGKEHLPIYITDSMVGHKLGEFAPTLNFRGHAKSDNRSrRNA	Atcg00820	YP_008563129.1	6	56	6	999	6.44207	5	3	8	-	-	-	-	-	-	-	-	plastid ribosome	plastid	-
	Solyc07g062870	RPS20	30S ribosomal protein S20 (AHRD V1 *-*- RS20_THEEB); contains Interpro domain(s) IPR002583 Ribosomal protein S20	MAGACLSSSCLSFSTKFNTLSLNGPHADAFRSLSFSANTSLNLFSKGTVSVNPVQMPFrRNASIVCEAAPTKKADSAAKRARQAEKrRNAIYHKAKKSEVRTRIKTVLEALETLRKKTDAESEEVVSVEKLIAEAYSAIDKAVKVGTLHRNTGArRNAKSRLArRNAKKAVEIHHGWYVPAPATEPDLVATA	At3g15190	XP_004244249.1	6	62	6	9	0.0580367	5	3	8	Cp	63	1	Cp	Cp	Cp	Cp	66	plastid ribosome	plastid	plastid
	Solyc02g068090	RPS21	30S ribosomal protein S21, chloroplastic (Fragment) (AHRD V1 *--- RR21_SPIOL); contains Interpro domain(s) IPR001911 Ribosomal protein S21	MAVSSIANLFSFFNPSKPPTPKAPTLQFSPSAVDSLTSSRPNNDSSSMVVSSNDNHKYPILPVSSSDSDVMAVTCPSLAYANTLYFRSAYNVQVIVGDNEPEEKLLGRFRREVMRAGVIQECKRRRYFENSQDEKKRRTRDAARRNRRRRGPPRNFSDDKQETTKSKRDDDGEDNWELPDGGVAF	At3g27160	XP_004233297.1	2	10	2	2.981	0.019223	5	2	7	Cp	63	1	Cp	Cp	Cp	N	99	plastid ribosome	plastid	plastid
	Solyc05g052710	RPS31 PSRP4	30S ribosomal protein S31, chloroplastic (AHRD V1 *-*- rRNA31_ARATH)	MASLLVGSVPMSTVQSMASLSPNLSFSRSHSVAGSVSITAASPSPSISFSSLTDSNLPLVYCGRGDKKTAKGKRFNHSFGNARPRNKKKGRGPPRVAAPPAAPKRDPFDDGQVVKIEIHDP	At2g38140	XP_004239932.1	3	21	3	30.623	0.197473	5	2	7	Cp	39	2	Cp	Cp	Cp	Cp	99.5	plastid ribosome	plastid	-
Plastid specific ribosomal proteins & other ribosome-associated proteins	Solyc06g073090	PSRP1	Plastid specific ribosomal protein 1	MATLSLSPSVGTTFHSLHSYPNGSSSYSSSCPATASPALSLTLSSTNSRFLNSAFKMNEINVPVRNRVTKSFGVRMSWDGPLSSVKLILQGKNLELTPAVKDYVEEKLGKAVQKHSHLAREVDVRLSVRGGELGKGPKIrRNACEVTLFTKKHGVIRAEEDGESIYGSIDMVSSIIQRKLRKIKEKDSDRGRHMKGFDRLKVRDPEALLVQEDLETLSQEEEVEDDKSDGFVTEVVRKKSFDMPPLSVNEAIEQLENVNADHDFYGFRNEETGEINIVYrRNAKEGGYGLIIPKEDGKTEKLEPLEVEPEKEPSIAE	At5g24490	NP_001233834	7	34	7	2.728	0.0175916	5	3	8	Cp	75	1	Cp	Cp	Cp	Cp	100	plastid ribosome	plastid	plastid
	Solyc05g009570	PSRP3 YCF65	Plastid specific ribosomal protein 3-1/Ycf65	MLSMSVQSSLKGNLSIPSLPSQNPGYKSFKSCSSLSFNNKGLSTRRIHKIFASAVAEAESVEVETSESVVQEIEKVDMKKKVIEKPRLVLKFIWMEKNIGLGLDQVLPNADHGSVPLSPYFFWPRKDAWEELKTTLESKPWISQKQMIILLNQATDIINLWQQSGGNLT	At1g68590	XP_00423894	3	18	1	6.197	0.0399615	4	2	6	Cp	51	1	Cp	possibly Cp	Cp	Cp	100	plastid ribosome	plastid	plastid
	Solyc03g034190	PSRP3 YCF65	Ribosomal protein PSRP3/Ycf65 (AHRD V1 *-*- B5W261_SPIMA); contains Interpro domain(s) IPR006924 Ribosomal protein, PSRP-3/Ycf65	MMLSMATQLTVNWVPAFSSQNQFFSPKFVFFTKGQSFSrRNASNVSAIVPrRNANLGGFATSAAAALSFAEETSTRDSISSDSLQKEKLGVLVKPLEKPRLVLKFIWMEKNIGISLDQVIPGHGTIPLSPYYFWPRKDAWEELKVMLESKPWISQKQAIILLNQATDIINLWQQSGGDLA	At5g15760	XP_004234566.1	5	23	3	4.623	0.0298115	5	3	8	Cp	58	2	Cp	Cp	Cp	Cp	99.9	plastid ribosome	plastid	-
	Solyc10g081100	PSRP5	Putative plastid-specific 50S ribosomal protein 5-like	MALLIFTATTPSVLLSSQSSSTSQASAFPASLSSRFCNNHFTLTPKSYANGYIQAPFIFQRRGALIATAAADIDSVGSDNPEPSPEKKEESVPVENLPLESKLQEKLEQKMKMKLAKKLRLRRKRLVRKRHLRKKGRWPPSKMKKNKNV	At3g56910	NP_001316881.1	2	8	2	9	0.0580367	5	1	6	Cp	66	2	Cp	Cp	Cp	Cp	87.6	plastid ribosome	plastid	plastid
	Solyc05g006070	HPE1 RBD1	High photosynthetic efficiency 1, HPE1, RBD1; RNA recognition motif (RRM)-containing protein-like (AHRD V1 *-*- Q6Z867_ORYSJ); contains Interpro domain(s) IPR000504 RNA recognition motif, RNP-1	MLSLGSYPRQPHCCASTISQCLPLFCKIPQPQLFFTSNTVTHLRIRSLIEQKRTGVCVFARKDEEKRGNSVVEMEEIEDFDDDYDDDDDDFLGDEEEVDGDDDDDDEVIIPLRNMKKWLENKPRGFGVDKEYDTSVEDKLMEEIEQSRKAQLANINKLKNNPVKANTKQVQQDKVVQDGLCVRLVNLPKKMNVDKDLRVAFKGVSGIVNIVPVVTGNKKTRNPVCKGMAYINFKSKDEAQRFVQMFSGRSISFGKVQKQIKCEMINPGSPKSTTTQSVHKIKHVPEKDIPDLSRDQDDDFDTDFLSDSEKNISTDYNVAEVEDLSAYTNGYEENSSAESTSGDEQDVGEESEFAEQKKVEAKEKKKRPKQKKEQVPKLNIPGSARKLKIKEKAVLTGVL…	At1g70200	XP_004238707.1	3	7	3	0.35	0.00225698	4	0	4	M	114	5	Cp	-	Cp	N	66.5	stroma	-	-
	Solyc08g077120	SOT1	Suppressor of thylakoid formation 1; Pentatricopeptide repeat-containing protein At5g46580, chloroplastic (AHRD V1 ***- PP420_ARATH)	MAAKFSTGLDIHCSIPYTSDTKLLYGSSSSSTKSSRLSIKRFTVLCNSTSKSPKPNLDLDSSRKKPSLSEQLKPLSNTILDDPPNQARILSKPKSTWVNPTRPKPSVLSLQRQKRSSYSYNPQIRDLKNFARRLSESHFSDDAFLAVLEDIPHPPTRDNALLVLNSLRPWQKTLFFFNWIKTRNLFPLETIFYNVAMKSLRFGRQFHQIEELAFEMIDSGV	At5g46580	XP_004245879.1	4	14	4	2.162	0.0139417	5	3	8	Cp	45	3	Cp	Cp	not Cp	N	78.2	plastid nucleoid	plastid	-
	Solyc08g077140	SOT1	Suppressor of thylakoid formation 1; Pentatricopeptide repeat-containing protein At5g46580, chloroplastic (AHRD V1 ***- PP420_ARATH)	MLNIYGSVGEKAMALFEEMSKVGIELNVMGCTCLVQCFGRAQRIDDLVKVFEVSVQRGVKPDDRLCGCLLSVVSYCKGDDADKVLACLQQANPRLVTFVKMLEDESTSYDIVKEEFRSILTNTSDDARRPFCNCLIDICRKRNRAERAHELLYLGTVYGLYPGLHTKTPEEWRLNVRALSVGAAQTAFEEWMRTLAKIVQSEEPLPEVLSANTGAGTHKFSQGLAFASHVEKFAAPFKQSEEKAGFFIATREDVVSWVHSKAAA	At5g46580	XP_004245879.1	4	9	4	0.896	0.00577787	5	3	8	S	-	5	-	-	Cp	C	99.89	plastid nucleoid	plastid	-
	Solyc04g080770	HFLX	GTP-binding protein hflX (AHRD V1 **** B6SXP6_MAIZE); contains Interpro domain(s) IPR016496 GTP-binding protein, HflX	MSLCFCSNLKPSILFPESKFRWIQTRTRPVSFTKLIQTKYSYRGCIKAVGEEIGVLSPDDSLSERNPVIEEEPVPETEVNEVENGVASVVAEGKAQTWISKSENKEKLDEEDENASRFKLRNGKEVFEEKAYLVGVACKGDTEDSFGIEESLKELAQLADTAGLLVVDSTYQKLSSPNPRTYIGSGKVSEIKSAIRAFDVETVIFDDELSPGQLRNLEKAFGGDVRVCDRTALILDIFNQRAATREASLQVSLAQMEYQLPRLTRMWTHLERQAGGQVKGMGEKQIEVDKRILRTQIGVLKKELESVRKHRKQYRNRRVSVPVPVVSLVGYTNAGKSTLLNQLTGADVLAEDQLFATLDPTTRRVQMKNGKEFLLTDTVGFIQKLPTTLVAAFRATLEE…	At5g57960	XP_004238264.1	5	7	5	0.638	0.00411415	2	1	3	Cp	5	4	-	Cp	Cp	C	83.6	plastid stroma	plastid	-
rRNA processing	Solyc04g078480	DCL	DCL protien	MAAPLLLRGLPLLRLRFCYQRLPNPSFVQLSSRLFSAASESAQPFDDAASDGDQTTAVLSAKDPPNYPRWSDPDYRKWKDQETQILKDIEPVIFLAKEIIHSDRYMDGECLTAEDEKIVVDKLLAYHPHSEDKIGCGLDSIMVDRHPQFKRSRCLFVVRLDGGWIDFSYQKCLRQYIRDKYPSYAEKFIKEHFKRGS	At3g46630	XP_004238128.1	1	1	1	<0.038	0	1	0	1	M	35	1	-	ER	Cp	Cp	85.03	plastid	plastid	-
	Solyc04g078850	DCL	DCL protien	MASICTSNFHFLCRKNNSSPISHHLLLSPSSLSFSRCGGLRLCRCAAVKTGSEGGGIRSDELLRKPVISTELETTSESEELVKEESDDEVGKKSGDGEGWVDWEDQILEDTVPLVGFVRMILHSGKYAIGDRLSPNADHQRTILQRLLPYHPECDKKIGPGVDYITVGYHPDFENSRCLFIVRKDGETVDFSYWKCIKGLIRKNYPLYADSFILRHFRKRRRND	At1g45230	XP_004238128.1	2	2	2	-	0	0	2	2	Cp	44	2	Cp	Cp	Cp	Cp	94.9	plastid	plastid	-
	Solyc02g077280	ERA-like	GTP-binding protein ERA homolog (AHRD V1 ***- D0MDG4_RHOM4); contains Interpro domain(s) IPR005662 GTP-binding protein ERA	MRALCLNVSLFTATLPKNNTPLIHSYCNCFSTSFPGDNGRFGQRVTTTRRRNSKSEIFLGDEEEVQAGENEKFSSIAEETSRAMRLRRSKGVVDTEEEEEEDDSSMLLSLSVKPDRNMALLDDYEMEELDFVPENPNHRSGYVAVLGKPNVGKSTLSNQMVGQKLSIVTDKPQTTRHRVLGICSGPNADHQMILYDTPGVIEKKMHKLDTMMMKNVRSAAVNADCVLVVVDACKVPAKIDEVLEEGVGDLKYKVPTLLVLNKKDLIKPGEIAKRLEWYEKFTDVDEVIPVSAKYGHGVEDVKDWILSKLPLGPAYYPKDIASEHPERFFVAEIVREKIFLQYRNEVPYACQVNVVSYKTRPNAKDFIQVEVIVERNTQKIILIGKEGKALKLLATAARL…	At5g66470	XP_004232950.1	9	31	9	1.555	0.0100274	5	3	8	Cp	66	5	Cp	-	Cp	C	99.6	plastid stroma	plastid	-
	Solyc08g042050	RH3	DEAD-box ATP-dependent RNA helicase 3 (AHRD V1 **** RH3_ORYSJ); contains Interpro domain(s) IPR011545 DNA/RNA helicase, DEAD/DEAH box type, N-terminal	MASSSSIIGVSSIYQTNPSLELSRRPTATPPLSLPFSIEKSNFHVHVRLRRPFLASAVVTPTSSVLSEEAFKGIGGFGKDSLNVSESEYDSEDEVEDNESNEDELSVSKLGLPHRLVDALEKRGITQLFPIQRAVLVPALEGRDIIARAKTGTGKTLAFGIPVLKKLSTDEEMRNTQRRGRLPKVLVLAPTRELANQVEKEMKESAPYLNTVCIYGGVSYATQQNALSRGVDVVVGTPGRLIDLINNNTLKLGEVEYLVLDEADQMLAVGFEEDVEVILEKLPPQRQSMLFSATMPGWVKKLSRKYLNNPLTIDLVGDQDEKLAEGIKLYALSATSTSKRSILGDLVTVYAKGGKTIVFTQTKRDADEVSMALSNSISSEALHGDISQHQRERTLNGFR…	At5g26742	XP_004244948.1	9	22	9	0.808	0.0052104	5	3	8	Cp	54	1	Cp	Cp	Cp	C	83.9	plastid nucleoid	plastid	plastid
	Solyc09g010870	RNR1	Exoribonuclease R/ribonuclease II (AHRD V1 **-* A5GLA4_SYNPW); contains Interpro domain(s) IPR001900 Ribonuclease II and R	MAVRAMNSCVIFRSAATPPLAVSRRCCCVRQLTAFSRHRNRSNSHSFLRCVPYPLSHVTVRNYSVQNLVEMVMEELASIHKRGRVRATSELESVSTGELLEDKLKKGTLQKGLLLEFKKDSERLLLAVALKPDGKKNWMVSDQNGITTSIKPQQVTFIVPGAENFEPTEISEFVQKAHDNLDPALLEFAWNELLEKNESVTVQELAEMIFGSAEPLETYCAHLLLSRDEVYFAVLESKGLSVYGPRTANQVDELLRRKLAKEASEKEFEELIQFLRSAKQMPHYDKPPRSSWKAEEKTWHKIESLEAFAIDSCKNDDQKKTAGMILKAMGQAKTSSAAVNLLIDIGYFPVHVNLDLLKLNLPTNADHRDEIISAAESLLSTSIDLDEADRIDLTSLKVY…	At5g02250	XP_019071225.1	17	47	17	3.87	0.0249558	5	3	8	Cp	13	2	Cp	M	Cp	M	61.3	stroma	mitochondrion plastid	-
	Solyc09g097910	SRRP1	S1 RNA-binding ribosomal protein 1; Polyribonucleotide nucleotidyltransferase (AHRD V1 *--- PNP_ALHEH); contains Interpro domain(s) IPR003029 Ribosomal protein S1, R binding domain	MSVAAMGIVSGGIGYLSQLFTSDIAASTHQFCCFSVNSSPLHMNFSRSGCLVKRGSLLSPRVSVSTTGNAKIDGVDDQLSLSPDEIKPARKSADWKAARTYSERGLIFEGKVEGFNGGGLLIRFYSLVGFLPFPQMSPYHSCKEPQKTIQEIARDLTGSVLSVKVIQADEDRRRLIFSEKEASWLKFSNKINVGDTYQAKVGSVEDYGAFVHLRFPDGSYHLTGLVHVSEVSWDLVHDVRDILTEGDDVRVKIINIDREKSRITLSIKQLEEDPLLETLDKVIHKDASVHKNSLDSNGSLVIEPLPGLETIIEELMQEDGIYDILISRQGFEKRVVSQDLQLWLSNAPATGDQFTLLARAGRQVQEIQLTTSLDQEGIKRALQRVLERVP	At3g23700	XP_004248019.1	8	43	8	2.594	0.0167275	5	3	8	Cp	63	4	Cp	possibly Cp	Cp	Cp	97.4	plastid stroma	plastid	plastid
	Solyc08g066180	YBEY	YBEY endoribonuclease	MLSRLSRTTPPPLAMAARVLPRSFHPTAASAMSVSTNSHFILPPSPTVAHISFGKSLSIIGRKFHYGLNCKEDRRWSVAGWSGKVFASQREYRKSRKRSLKKKEKELELSVNICIEEQLPDDPEIVDISEMLRLNVPMAMKFAFDNLKDSDYQTRDRAINDVGCFESVELSVLLCNDEFIRELNKDWRDVDSPTDVLSMSQHIPELELPILMLGDIVISVETAARQAEERGHSLLDEIRILLVHGLLHLLGFNADHEISDEAEAEMEKEEELLLKCLGWKGKGLIQSAYDAEAAGSSLLENIDRKKEGSLRFYRPKFSYIFCDMDGTLLNSKSQISSATAEALREATSRGVKVVIATGKTRPAAITLLKSVGLAGKDGIISEVSPGVFVQGLLVYGRQG…	At2g25870	NP_001310488.1	9	42	9	2.899	0.0186943	5	3	8	M	31	4	Cp	M	Cp	M	90.2	plastid	plastid	-
	Solyc02g071280	-	Ribosome maturation factor rimM (AHRD V1 *-*- A4CTC3_SYNPV); contains Interpro domain(s) IPR011961 16S rRNA processing protein RimM	MQGSSALSCSSNSISAPVGLCCSQRLTLPFRNQRIGFLENPSSLKIFHFHRNTTLPLLNCTATEEIVEASETEGLFVETGYIYSVHGLQGEVRVKATTDFPELRFSQPGRRWLRQQVTGRDMIQEIELVEGRGHPGQKSWILKFHEINTIEQAQKLVGSALLVKNEDRPILEEGEFYTPDLVGMKVFLKETRELVGTVINVFNSGASDLLHVELLPNQNARPQLEGSASGPLVWVPFVEAIVPNIDLSKREMLITPPKGLLELNIRADERSKKERRQLEWKERKKSQKRLIAAKKILHEMEQNADHIFHGFRYGEKNQRSFLANQIVDVNSILLQHALQNKKIPYKRWSFPDFVNALQVNNTLKLSKEFFSKENVEHSSIVSKVQEQGHCLISSGKVAI…	At5g46420	XP_004232981.1	1	1	1	0.105	0.000677094	1	0	1	Cp	21	2	Cp	possibly Cp	Cp	Cp	90.7	plastid stroma	plastid	-
	Solyc01g086900	-	RNA methyltransferase TrmH group 2 (AHRD V1 *-*- Q3M884_AVT); contains Interpro domain(s) IPR001537 tRNA/rRNA methyltransferase, SpoU; tRNA (cytidine(34)-2'-O)-methyltransferase (based on NCBI blast)	MERAGLKTLNTVVSPLHFRAKASIFRPLLLPQVVHNLHFPLLSSSSRLSPLRSLCVRSDASTMLNGAGGVAAQNKLLQVVLVSPQIPGNTGSIARTCAASAVGLHLVEPLGFPIDNTKLKRAGLDYWPYVVVKVHRSWDEFREYFMGQAGEKRLLAFTKRGIATHSDFSYKKGDWLVFGSETKGLPPEALLDCKSESLGGGTLRIPMVETYVRCLNLSVSVGIAVYEASRQINYEQLQCPPDTCMDTETSFVTEDIFA	At5g26880	XP_004229609.1	2	5	2	0.468	0.00301791	5	0	5	M	66	4	Cp	Cp	Cp	Cp	77.4	-	-	-
	Solyc08g007950	-	RNA binding protein S1 domain (AHRD V1 *-*- B9CNP3_9ACTN); contains Interpro domain(s) IPR003029 Ribosomal protein S1, RNA- binding domain	MNNLSLDKTSTPNPLLSISSLHHSRISKSLCLPRKVLVFADKNDNSASITSGFLSKTHFSYKKVTVFADKDDNSSPVASGVLSRTHFSSKKVAVFASKDDNFSSITSGVLSRTVFSSRKTKKFVVFASKDDRNSNKLDQWDQMELKFGRLIGEDPKLTLAKIISRKTNPETSYLEIEESFEQKKGKTSGETVEVPFDASKQKKSLNSSNGLNLVRPVPKKGVKFEVDEKQPKTEGYKQSQPISRPEVSRKSSVPNVILRKPSLYSEEDESSKFKIKPNLTLKMGRELKPEKFSDVTLLKKPEPMRISSDDSEKNGQSSDKSSDATLLKKPEPMRISSDDSEKNGQSSDVLPVSSDDSEDASLTEVYASSSEPKNSLLLNKPEPSNLNLKIDPNKESSEV…	At1g12800	XP_004244605.1	26	67	26	2.424	0.0156312	5	2	7	Cp	37	5	Cp	-	Cp	N	99.7	plastid stroma	plastid	-
Initiation, elongation, termination & regulation	Solyc12g098350	IF1	Translation initiation factor 1 (AHRD V1 *-*- D1M7Q2_PARAR); contains Interpro domain(s) IPR006196 S1, IF1 type	MASLSWWNPAPATAAMAACSPTPTSCKTSNSLALPRSVFVSKQEELMKQAKSLLVKTQQQSKKKKNNSTNSrRNATTSIQCLSQEQKWTHEGSITESLPNGMFRVKLDNADVVLGYISGKIRKNFIRLLPGDRVKIEVSRYDSSKGRIIYRLRGGREG	At4g11175	NP_001234573.1	2	5	2	0.668	0.00430761	4	0	4	Cp	81	1	Cp	Cp	Cp	Cp	100	plastid stroma	plastid	-
	Solyc07g056020	IF2 FUG1	Translation initiation factor IF-2 (AHRD V1 **** A5B2X2_VITVI); contains Interpro domain(s) IPR000178 Initiation factor 2	MSSMASLVSLGSVCGCSSGQFEGSFSLVrRNAVSFSKNFGSVNRIWGGKRWRYVSVCRYSVTTDFVADQGTSISLESSSSSNKDDDADLMLKPAPKPQLKPGPRPGPVLGNGPVLSSNSDGEKRNPIEEERSKVIESLGEALETAEKLETNRKTNVSVNKASASARTTQRNSKTVDSDDSSNRKSKTLKSVWKKGNPIAAVQKVVKPPPKQEPMTDGGRNSESQSVAPIKPPQPPQKVQPQLLARPSVAPPPPIIKKPVILKDVGAAAKSPPSDGVESVGKTKELEAAGKTKERKTILVDKFASKKSAVDPVIAQAVLAPPKFGKSAPPGKFREEFRKKSGVSGGQrRNARMVDDGIPDEEASELDVSLPgranaRKGRKWTKASRKAARLKAAQESAP…	At1g17220	XP_004243227.1	17	50	17	2.332	0.0150379	5	3	8	Cp	64	1	Cp	Cp	Cp	Cp	87.1	plastid stroma	plastid	plastid
	Solyc07g005830	IF3-4	Translation initiation factor IF-3 (AHRD V1 ***- B9T4Q8_RICCO); contains Interpro domain(s) IPR001288 Translation initiation factor 3	MAGLTTSTSFTLTPISSKPITNKPLFLHYLNSSIFGLRFHNPQLRSCSSLIYHSATISARYGGGGGRGGFRPPPRSEEDEALDISSIRSDKVRLIDDKQNMLGIVSKMEALQRAEDASLDLVILSPEADPPVVKIMDYNKYKYELQKKKKEQQKKNAASRMDLKELKMGYNIDSHDYSVRLKAAQKFLKDGDKVKIIVNLKGRENEFRNNAIELLrRNAFQNDVGELATEENKNFRDRNVFIVLVPNKAIVQKAPEQPKKKEKPATEVSASV	At4g30690	XP_004242613.1	9	26	9	5.31	0.0342416	5	3	8	Cp	58	2	Cp	Cp	Cp	Cp	100	plastid stroma	plastid	-
	Solyc08g075100	IF-4F	Initiation factor 4F	MTSTSAAYMATTTFTSNLLETKQKPLFPNNFPYLFRPFSPRNLKNPKIFKFPKMTLSNDYMGIGSFNSTRTNYNTPTTGKFYKRMDSCLVIPPPKGIKPKAIIKFVGGAFIGAVPEVTYSYLLENLAREGYLIICVPYNVTFNADHAQVSRQVFERFHACFDPILASGLPDSGLSADDIVDLPLYSVGHSNGALIQALVGSYFCEKIPKANVIISYNNRPASEAVPYFEQLGLLVGQMVPVISPAYSMAQSASENLECFKNAYNVNRTLLVKFDNDAIDETDRLEETLKPRVESFGGKVEKIALTGNHITPCVQEPKWRVGAVYTPADAIAQVVKTLSINDTKGLCTTIANWFSSLKE	At3g43540	XP_004246026.1	2	4	2	0.52	0.00335323	4	3	7	Cp	5	4	Cp	-	Cp	Cp	93.4	plastoglobules	plastid	-
	Solyc08g062920	EF-2	Elongation factor EF-2 IPR000795 Protein synthesis factor, GTP-binding	MVKFTAEELRRIMDFKHNIRNMSVIAHVNADHGKSTLTDSLVAAAGIIAQEVAGDVRMTDTRADEAERGITIKSTGISLYYEMTDDSLRNFKGERNGNEYLINLIDSPGHVDFSSEVTAALRITDGALVVVDCVEGVCVQTETVLRQALGERIRPVLTVNKMDRCFLELQVDGEEAYQTFQRVIENVIMATYEDPLLGDVQVYPEKGTVAFSAGLHGWAFTLTNFAKMYASKFGVDESKMMERLWGENFFDPATKKWTTKNTGTASCKRGFVQFCYEPIKQIINTCMNDQKDKLWPMLQKLGVTMKSDEKDLMGKALMKRVMQTWLPASTALLEMMIYHLPSPSTAQKYRVENLYEGPLDDAYAIRNCDPEGPLMLYVSKMIPASDKGRFFAFGRVFAG…	At1g56070	NP_001308654.1	12	21	1	1.352	0.0087184	5	2	7	-	-	3	-	-	Cp	M	57.06	-	cytosol	-
	Solyc08g079180	EF-G	Elongation factor G (AHRD V1 ***- Q9SI75_ARATH); contains Interpro domain(s) IPR004540 Translation elongation factor EFG/EF2	MAAESVTRMSSAASSLCNFNGSKRPVPVSNRVTSSrRNANRCVKLQSLASASMSEFFGSSRVFSVNGSRSLGLSQKTRKNGFSVIAMAAAEEEKRTVPLKDYRNIGIMAHIDAGKTTTTERVLYYTGRNYKIGEVHEGTATMDWMEQEQERGITITSAATTTFWNKHRINIIDTPGHVDFTLEVERALRVLDGAICLFDSVAGVEPQSETVWRQADKYGVPRICFVNKMDRLGANFFRTRDMIVTNLGAKPLVIQIPIGAEDTFKGLVDLVMMKAIVWSGEELGAKFSYEDIPADLQELAEEYRALMIETVVELDDDVMEKYLEGVEPDEATIKQLIRKGTISGNFVPVLCGSAFKNKGVQPLLDAVVDYLPSPVDVPPMNGTDPDNPEVIIERAPSDD…	At1g62750	NP_564801.1	28	363	28	27.804	0.179295	5	3	8	Cp	83	1	Cp	Cp	Cp	Cp	67.4	plastid stroma	plastid	plastid
	Solyc10g075020	EF-P	Elongation factor P (AHRD V1 ***- B6UC94_MAIZE); contains Interpro domain(s) IPR011768 Translation elongation factor P	MAGLTNLKLSLFPNSCSLSSLSSNPFLVSTSIFrRNATSHCFPKIFAFSSNDIKVGSNIEVDGSPCKVIEFLHVKPGKGAAFVRTTLRNYVTGNSVEKTFRAGSKIEEANIYKETKQFTYKDGAQYVFMDLTSYEEYRLNEKEVGDKAKFLKEGMDCSLLFWNGKVIDFELPITVKLTVVDVDPGVKGDTAQGGSKPATLDTGAIVSVPLFINRGEEIMVDTRNGQYMSRA	At3g08740	XP_004249039.1	7	23	7	4.878	0.0314559	5	3	8	Cp	54	4	Cp	Cp	Cp	Cp	96	plastid stroma	plastid	plastid
	Solyc07g018360	PETS	Polyprotein of Elongation factor Ts (AHRD V1 ***- Q9SZD6_ARATH); contains Interpro domain(s) IPR014039 Translation elongation factor EFTs/EF1B, dimerisation	MAPMVTIATTNVSVTPGAVLLTRRNQCLSKYDVSRKSSKQTLPTPKYILPLSTSIKLFPHFRVGCILRHKLRGLVVSATETDVAVEEVEATAADDGSGGVAEASSDAAEISEESSVSDVSPRSVQSKRSRPARKSEMPPVKNEDLIPGATFPGKVRSIQPFGAFIDFGAFTDGLVHVSRLSDSYVKDVGSIVSVGQEVTVRLVEANTETGRISLTMRESDDPSRPQQQKDAPTNSDRPRTQRKSTQRNNQRRDEKVSKFVKGQDLEGTVKNLTRSGAFISLPEGEEGFLPASEETDEVFGIIDSGSSLTVGQEVNVRVLRIARGQVTLTMKKEEAASELDSKLNQGVVYSATNPFLLAFRSNKEISSFLDEREKEDEQAEQSKEDAQESDAATIKIDVL…	At4g29060	XP_004242929.1	32	165	32	7.286	0.0469839	5	3	8	Cp	76	3	Cp	Cp	Cp	M	91.2	plastid ribosome	plastid	plastid
	Solyc03g112150	EF-TuA	EFTuA, Elongation factor Tu (AHRD V1 **** D7MFK2_ARALY); contains Interpro domain(s) IPR004541 Translation elongation factor EFTu/EF1A, bacterial and organelle	MASISAAAATATSSPKLLNPSNPLLPSAAKPSKLILSSSFTPNFSTLLLHSPAATSPTTHHQrRNAFTVRAARGKFERKKPHVNIGTIGHVNADHGKTTLTAALTMALASMGNSAPKKYDEIDAAPEERARGITINTATVEYETENRHYAHVDCPGHADYVKNMITGAAQMDGAILVVSGADGPMPQTKEHILLAKQVGVPNMVVFLNKQDQVDDEELLELVELEVRELLSSYEFPGDDIPIVSGSALLALEALMANPSIKRGENEWVDKIFTLMDNVDSYIPIPQRQTELPFLMAIEDVFSITGRGTVATGRVERGTVRVGETVDIVGLRDTRSTTVTGVEMFQKILDEAMAGDNVGLLLRGIQKIDIQRGMVLAKPGTITPHTKFEALVYVLKKEEG…	At4g20360	XP_010319023.1	20	456	8	123.52	0.796521	5	3	8	Cp	68	1	Cp	Cp	Cp	Cp	99.9	plastid stroma	plastid	plastid
	Solyc06g071790	EFTuB	EFTuB, Elongation factor Tu (AHRD V1 **** D7MFK2_ARALY); contains Interpro domain(s) IPR004541 Translation elongation factor EFTu/EF1A, bacterial and organelle	MASISAASATAAAAASTKINTSGTVLPSKSSKLILSSSFTPNPSTLFLHSPATTAPSSSSSRHRRFTVRAARGKFERKKPHVNIGTIGHVNADHGKTTLTAALTMALASLGNSAPKKYDEIDAAPEERARGITINTATVEYETENRHYAHVDCPGHADYVKNMITGAAQMDGAILVVSGADGPMPQTKEHILLAKQVGVPNMVVFLNKEDQVDDEELLELVELEVRELLSSYEGDDQWVDKIYKLMDSVDEYIPIPQRQTELPFLMAIEDVFSITGRGTVATGRVERGTVKTGEIVDIVGLKDTRNTTVTGVEMFQKILDEAMAGDNVGLLLRGIQKIDIQRGMVLAKPGSITPHTKFEALVYVLKKEEGGRHSPFFAGYRPQFYMRTTDVTGKVTAIM…	At4g20360	XP_004241515.1	21	530	9	207.057	1.33521	5	3	8	Cp	69	1	Cp	Cp	Cp	Cp	98.6	plastid stroma	plastid	plastid
	Solyc03g058190	EF-TypeA SVR3-like	Elongation factor family GTP-binding protein (AHRD V1 **** Q67QM4_SYMTH); contains Interpro domain(s) IPR006298 GTP-binding protein TypA	MEMSMASTTPCFSLPKKTFCISTPLLKKQLFGTTLPGCLSAKLPLKLNPIHTSIKCAVSEATQAPSALEKKSQLMRRSDIRNIAIVAHVNADHGKTTLVDSMLKQAKVFRDNQFVQERIMDSNDIERERGITILSKNTSITYKDTKINIIDTPGHSDFGGEVERILNMVEGVLLVVDSVEGPMPQTRFVLKKALEFGHAVVVVVNKIDRPSARPEFVVNSTFELFIELNATDEQCDFQVIYASGIKGKAGLSPENLGEDLGSLFEAVIRCIPGPKINKDGALQMLATNIEYEEHKGRIAIGRVHAGSLRRGMDVKICTSEDACRFGRVSELFVYEKFSRVPAETVEAGDICAVCGIDDIQIGETIADKSDGKPLPSIKVEEPTVKMSFSVNTSPFVGRE…	At5g13650	XP_004234769.1	7	15	7	0.812	0.0052362	5	1	6	Cp	66	5	Cp	Cp	Cp	C	50.1	plastid stroma	plastid	plastid
	Solyc09g074650	APG3	Peptide chain release factor 1 (AHRD V1 **** A0YJR4_LYNSP); contains Interpro domain(s) IPR004373 Peptide chain release factor 1	MNTLANSGFTTAGISTACSIQFPVRRRCSGLPGGGLALIRAPPNRSSSRRIICMAEPYLIKKLDSAEKTWKELSVKLADPDVVSNPSEYQKLAQSMSELDEVVLTYRNYKDCEKQLEEAKALAKEAGTDEDMAEMVASEIQSLTEQIKELEEKFKLMLLPSDPLDARNIMLEVRAGAGGDEAGIWAGDLVRMYEKYSERNSWKFAPISCSEAEKGGFKTYVMEIKGNRVYSKLKYESGVHRVQRVPLTETQGRVHTSTATVAIMPEADEVDVEIDPKDIELTTARSGGAGGQNVNKVETAVDLYHKPTGIRIFCTEERSQLKNKNRAFQLLRAKLYEIKVREQQESIRNQRKLQVGTGARSEKIRTYNYKDNRVTNADHRLKMNFPLMTFLEGDIETAV…	At3g62910	XP_004247450.1	5	18	5	1.239	0.00798971	5	3	8	Cp	52	2	Cp	Cp	Cp	C	50.4	plastid	plastid	-
	Solyc04g025290	PRFB	Peptide chain release factor 2 (AHRD V1 **** B6UHD9_MAIZE); contains Interpro domain(s) IPR004374 Peptide chain release factor 2	METVVQSSVGIYSKPFHSLARKLIKASSGPITRVTEMDRRRGGISLLTSHSFFPAIRRIRAMHKSITSSPTVSFATPEVGVTNTETREWAMQDFYTLRKDVETVLERVQEIRAAAGLKQLQEDLAALEAAAADRSLWDDRAKAQETLQALTDCKDKLKLLRDFKTQADDAETIIKLTEEMDSIDSVFLQEASGIIKELNKALDRFELTQLLSGPYDKEGAVITITAGAGGTDAQDWADMLLRMYVRWAEKQRYKTKVVEKSVGEEAGIKSATVEIDGRYAYGYLSGEKGTHRIVRQSPFNSKGLRQTSFTGIEVMPLLPEDSTNVEIPEEDLDISFTRAGGKGGQNVNKVETAVRITHIPTGVAVRCTEERSQLANKIKALSRLKAKLLVIAEEQRASE…	At5g36170	XP_004237247.1	8	22	8	1.462	0.00942773	5	3	8	Cp	60	3	Cp	Cp	Cp	C	98.3	plastid	plastid	-
	Solyc01g112060	YCF39 HCF244	Uncharacterized protein ycf39 (NCBI); similar to AtHCF244; NmrA family protein (AHRD V1 **-- B2J8Q2_NOSP7); contains Interpro domain(s) IPR016040 D(P)-binding domain	MASTLYGHLATPTLPSRKLSSLSCPTMFHSALSFSIATTKAKHGSAPKVVCNAQSAPAALNLAPGTPVRPTSILVVGATGTLGRQVVRRALDEGYDVRCLVRPRPAPADFLRDWGATVVNADLSKPETIPATLVGVHTVIDCATGRPEEPIKTVDWEGKVALIQCAKAMGIQKFIFFSIHNCDKHPEVPLMEIKHCTEKFLRDSGLNHVVIRLCGFMQGLIGQYAVPILEEKSVWGTDAPTRIAYMDTQDIARLTFIALRNENINGKLLTFAGPRAWTTQEVITLCERLAGQDANVTTVPVSVLRFTRQLTRLFEWTNDVADRLAFSEVLTSDTVFSVPMAETYNLLGVDAKDVSSLEKYLQDYFTNILKKLKDLKAQSKQTDIFF	At4g35250	XP_004231083.1	9	49	9	1.994	0.0128583	5	3	8	Cp	88	2	Cp	Cp	Cp	Cp	99.5	thylakoid	plastid	plastid
	Solyc09g065270	RRF	Ribosome recycling factor (AHRD V1 **** B6TQ52_MAIZE); contains Interpro domain(s) IPR015998 Ribosome recycling factor, bacterial-like	MTIALSPATPVRLLCQQQLTRKPVLFCFQDKFPTSGNVVCWSASANYSSLWVGARRLQPLVKPSWGKRSGIVRCATIEEIEAEKSSIEKDVKERMEKTVETVRSNFNSIRTGRASPAMLDKIEVDYYGTPVSLKSIAQISTPDATSILVQPYDKSSLKAIEKAIVSSDVGMTPNNDGEVIRLAVPQLTSDRRKELSKIVSKQAEEGKVAIRNIRRDALKAYEKLEKEKKLSEDNVKDLSSDLQKVTDEYMKKIDIVFKQKEKELLKV	At3g63190	XP_004247170.1	12	76	12	9	0.0580367	5	3	8	Cp	73	5	Cp	possibly Cp	Cp	Cp	76.5	plastid stroma	plastid	plastid
	Solyc09g064790	PAC	Pale cress	MESIALGLTCTATVFPHSFPSTSSLSTFYSIKFPSTTALRSKGIEEKDLYGLPKEFYDDEWQAKQREKTKELHRRRQQEEEEEEEKIDEYREIGLRLKDYPEEELVKAKKLVASFIRSAEEVEEKIEEAAEKGELDELVLLIIWNRLDLARRDDEKDAVRSLDLLYRRVETEILKREATPAMRLLDDLLNMHDGGLDNEGWLKACKKRMVDTFPREDPFSILVPAGFDIDTHQGPLRPTLEADDMLLRIDFVREVDELLKEVRSEYTESLEAQGLDPESVASRLKQQEKQRAIHQVESLLDLAINLVW	At2g48120	XP_004247143.1	3	7	3	0.585	0.00377238	4	3	7	Cp	40	4	Cp	possibly Cp	Cp	C	70.3	plastid stroma	plastid	-
	Solyc01g110550	RBF1	Ribosome-binding factor A (AHRD V1 **** B6TDG2_MAIZE); contains Interpro domain(s) IPR000238 Ribosome-binding factor A	MQNLVIQIPRLRPLPPSTQCLLPATMSLSPAKHINLRQFDSRELKTNSRSVNRRFIRCMANPRRVKMVAKQIRRELSDMLLTDKVLQYAVLPEAALGADRYLSSLTTISDVEVSTDLQVVKVYVSVFGDERGKEVALTGLKSKAKYVRSELGRRMKLRLTPEIRFIEDESLERGSRVLAILDRIKDENENKDSPNDGSSESDYDGDWEGDDPDDEGIIYVK	At4g34730	XP_004230968.1	5	16	5	2.981	0.019223	5	3	8	Cp	57	4	Cp	-	Cp	Cp	64.7	plastid stroma	plastid	-
	Solyc02g055440	YCED2	large ribosomal RNA subunit accumulation protein YCED homolog 2, chloroplastic (per NCBI); Genomic DNA chromosome 3 P1 clone MPN9 (AHRD V1 ***- Q9LT28_ARATH) [E3 ubiquitin-protein ligase, putative (DUF177) [Arabidopsis thalianana], e-value 6e-65]	MASRGGGWISSRSCINTSIPQRDSSTRISKGNHLSLITKKSKKPLVRISSSDGKWHGEWNSDYIFTLKDLQLEDLAEERDTPISIQLSIHKHAGFGLSVDGTIITSFTTKCSNCYSPYCREVHTSFKVWVLPSTRDNKGCAHQLPLLGWDDPSVIYVKPGFEADLDSLIQDTVRLATSVKETCSESCEKSVPKLQPLGKQNAASIDRRWSRLLELKKET	At3g19800	XP_004231729.1	1	4	1	0.166	0.00107045	4	0	4	Cp	47	4	-	Cp	Cp	Cp	56.5	-	-	-
	Solyc04g015450	GUF1	GTP-binding protein lepA (AHRD V1 **** A8YK29_MICAE); contains Interpro domain(s) IPR006297 GTP-binding protein LepA	MATANFCRPKFIHHHHQHQNCFNLPTNLYFSQHLKSKRGDGAQSVRRRRQRWRSSLRVDCQAAATDLEATARAGKDRLLKVPISNIRNFSIIAHINADHGKSTLADKLLQMTGTVESRDMKEQFLDNMDLERERGITIKLQAARMRFIYENEPYCLNLIDTPGHVDFSYEVSRSLAACEGALLVVDASQGVEAQTLANVYLALENNLEIIPVLNKIDLPGADPARVCQEIEEIVGLDCSNAIYTSAKEGIGISEILNAIVQRIPPPRATAERPLRALIFDSYYDPYRGVIVYFRVIDGTIKKGDRVLFMASGKDYYADELGVLSPNQLQVDQLYAGEVGFLSASIRSVADARVGDTITHFQRKAEQSLPGYKEATPMVFCGLFPVDADQFSELRDALEK…	At5g08650	NP_001308380.1	16	43	16	2.765	0.0178302	5	3	8	-	-	5	Cp	-	Cp	M	72.2	plastid stroma	plastid	-
	Solyc02g005200	TAB2	PsaB translation factor (Fragment) (AHRD V1 ***- A4S2E4_OSTLU); contains Interpro domain(s) IPR009472 Protein of unknown function DUF1092	MACLSCSLPLLQTHKAISNFSVFPFKSVAICLPKCKVKSVHIPSVSEASSISSTNLEEEEDDDPTAELVYLDPEIDPESLSEWELDFCSRPILDIRGKKLWELLVCDDSLSLQYTKYFPNNLINSITLKDALLSISNDLGIPLPDKIRFFRSQMQTIITRACNELAIKPVPSKRCLSLVLWLEDRYETVYTRHPGFQKGAKPLLALDNPFPMELPENLYGEKWAFVQLPVSAVRKEVSNLETRLVFGSSLDLDLLGIEIEDNTLIPGLAVASSRAKPLAAWMNGLEVCSIEADVDKASLILSVGISTRYIYATYKKNPASTSEAEAWEAAKKACGGLHFLAIQNDLNSDDCVGFWLLLNLPPPPV	At3g08010	NP_001316880.1	4	13	4	0.848	0.00546834	5	3	8	Cp	44	3	Cp	Cp	Cp	Cp	31.7	stroma	plastid	-
ribosomal RNA or protein modification	Solyc11g008360	SVR1	Pseudouridine synthase family protein (AHRD V1 ***- D7LCF4_ARALY); contains Interpro domain(s) IPR006145 Pseudouridine synthase, RsuA and RluB/C/D/E/F	MAAMAAAVAAATSAFTSLHLTRATPYTrRNAHIRTFITSSLSSSSTKFNITFAPPKPKPKTKPEPAIPIINPNSDSNSDSVPNLDAEVGDQLYIPWIVRDEKGNLTLQSTPPARLLHEMANASTGKKKKKGKEVASKAATVVPTPEPKHSKAArRNAFYNENFRDPPQRLSKVLAAAGVASrRNASSEELIFQGRVTVNGSVCKTPQTKVDPARDVIYVNGNRLPKKLPTKVYLALNKPKGYICSSGEKETKSVMSLFDDFIKSWDKRHPGQPKPRLFTVGRLDVATTGLIIVTNDGEFTHQISHPSSNLSKEYIATIDGEVHKRHLIAISEGTIIDGVHCTPDNVELLPGQPDLSRPRLRIVVHEGRNHEVRELVKNAGLQLRALKRIRIGGFRLPAD…	At2g39140	XP_004250054.1	3	5	3	0.551	0.00355313	2	0	2	Cp	81	2	Cp	Cp	Cp	Cp	97.8	plastid stroma	plastid	-
	Solyc07g062930	PRMA-like	Ribosomal protein L11 methyltransferase-like protein (AHRD V1 **** Q9FN34_ARATH); contains Interpro domain(s) IPR010456 Ribosomal L11 methyltransferase	MTMVLNSLRGHFFKNLSCTTSSIITGRFFNGrRNAVHRLIPFIHLSKSCAAQRYKHWKRIQTAAKFSTLSSPSSETPASDSFTSPYLSVRICCQKDVADMLSEALLCFGASSTTVDEEERSDEIIITSIFSVCKDVKDCISLAADsignalQKIPSFEVTMHNADHTDWIKATQELFCPVEVTDGLWVVPEWTTPPDPQATNIILNPGLAFGTGEHPTTKLCLLLLRDLIKGGEFFLDYGTGSGVLAIAALKFGAAFSVGFDIDPQAITSAQYNATLNNIGHEELLLKLVPGKGILPSADFSSSMDIDQTAYDAEVLNNRGKYDIVVANILLNPLLELADEIVSYAKPGATVALSGIISEQIPRILERYSQYLENITVTKMDDWACISGLKK	At5g53920	NP_001315978.1	1	2	1	0.233	0.0015025	2	0	2	Cp	59	5	Cp	Cp	Cp	Cp	50.7	-	-	-
	Solyc02g049070	-	rRNA small subunit methyltransferase J [At5g08540]	MAASACTVLNFSHPHVASTSQYIPTLSTPINRTLSFPRHRSNTFVVTVGFSTRAAKSDSGANVSSDKKKEVLEDEEEEEMPWIQEKALDLVEFTGSVTQAIPGPRIGSSSFPWILTVPLTYFGITFVIAFVKTARKFNSPREKRKKLVNKNAELCKSIDELFEKGKDFVEPSTLKGLAQKTGFDMEEIFRKYIRYSLNEKPFSPDLVAYLIQLRKASMLTDSEVAGILNEISRRIVQDKGPVVMDISGYSEKGLKRKLAVQTLFGKIYYLSELPEFCSRDSSLTVKEIFGVADEDAEKLRLHTIPEAGNMDSLERMVNGSDSE	At5g08540	XP_004231721.1	2	4	2	0.334	0.00215381	3	0	3	Cp	64	1	Cp	Cp	Cp	Cp	99.3	envelope-inner	plastid	-
	Solyc10g012410	-	Ribosomal RNA small subunit methyltransferase G	MGDLYALDFDGVLCDSCGESSLSALKAAKVRWPSLFNGVDSSLEDWIVDQMHVVRPVVETGYENLLLVRLLLESIIPSIRKSSVAEGLTVEGILENWSKIKPIIMAEWNEDRDFLIDLFGKVRDEWMDNDLATWIGANRFYPGVPDALKFASSKLYIVTTKQSRFADALLKGIAGITIPAERIYGLGTGPKVKVLKQLQEMPEHQGLKLHFVEDRLATLKNVIKESELDGWNLYLGDWGYNTQKEREEAAGISRIRVLELSDFSNKLK	At2g45990	XP_004248047.1	8	37	8	6.197	0.0399615	5	3	8	-	-	3	-	-	Cp	C	92.85	plastid stroma	plastid	plastid
	Solyc02g088540	-	tRNA guanosine-2'-O-methyltransferase (AHRD V1 *-*- B9L1B3_THERP); contains Interpro domain(s) IPR001537 tRNA/rRNA methyltransferase, SpoU	MSACKTLVRSSISFFQFQTRNSYQRSFSSHISSNFSFFRPLPLLSRNPAFRIEPCRDPSRRYGSTQGAISLETSEEMAVPRVAVESSEEKSKDTVEELLYNKDDVSKLMKMERRLDTEGLGHQERWFPYLDKVKAGSMYLSSSEILEAVTPYIMDSRKERFRHAVKNRTYSVCLVVEGLSDFGNVSATFRSADALGIQSVHVVACDSSKRYRENRHVSMGAEKWLDIELWDSVHECFTVLKSRGYRIATTHLGMDTVSVYDMDWSCPTAIVVGNELRGISDEALESSDLHCSIPMKGMVDSFNVSVAAGLLMHHAVCDRTSRLGCHGDLTREESRILLAEFSLRHNDNAIRIAQEYAERKIAELKSKL	At5g15390	XP_004232187.1	1	1	1	0.233	0.0015025	1	0	1	Cp	74	4	Cp	possibly M	Cp	Cp	88.3	-	-	-
	Solyc03g121260	-	RNA methyltransferase; 23S rRNA (Uracil-5-)-methyltransferase RumA (AHRD V1 **** D8F5E6_9DELT); contains Interpro domain(s) IPR001566 23S rRNA methyltransferase/RumA	MAAAAATFGIRSVPSNIWLHKFGARTAAASIRSRSFTTLASLSPVEDTEDIQLNVIPKEDARELVSNTSNNNNYKSNKSYYPKRGQTLELVCESLAFKGKGVCKVADSGFVLMCDRALPGERFIGRVTRKKDNYAEVKKLKTITPHSDYVEAPCEYASHCGGCKTQSLSYEAQLKAKEQQVRDLVVHVGKFSEQEPEHAGVMKPIVPCDIQFHYRNKMEFSFGPKGWVPAEQLQEKSTDECVYALGLHAPGFFDKVLNVNKCLLQSDSANEVLATVQECWRDPELGLSPWNVHSHTGFLKHLMLRSGRNIETGLPELMVNFVTSSDNPECLRPLVEKIATIPEVVSIVNNVNTSIGNTSVGEKEYTLYGKSTITEILRGLTFQISANSFFQTNTRQADV…	At3g21300	XP_004235625.1	3	8	3	0.389	0.00250847	5	0	5	Cp	27	4	Cp	M	Cp	Cp	96.1	-	-	-
	Solyc12g015710	-	tRNA methyltransferase 4E; contains Interpro domain(s) IPR001678 Bacterial Fmu (Sun)/eukaryotic nucleolar NOL1/Nop2p	MQKIGSISDTVMEILNFPASSFFSDQHAHTIMPILFSGRTLHFPKLSATSSSSSESHNSKQVKFAKKISQNSATSVRRAGSGSPLRKTHKLNLEVSPHRAVSAVRLMRIELGGAFADLLNEQGKGSGDNEMGYVERTLGFRTRDLDDRDLRLVTEVVGGTIRWRRYLNADHLILSLCHDERTFRSMEPLLVQILRIGFYEITKLDMPPYAVVDESVRLAKVALRPGAGNLVNGILRKLAVLKESDSLPAVEVNGDDRQQARGLATLYSHPVWMVRRWTKYFGQDEAIKLMTWNNSYPSFSLRANTGKGLTGADLVSRLNMLKVPHEPSLYLDDFVRLKTGMQNVIQAGLLKEGFCAVQDESAGLVVSIVDPQPGENIIDCCAAPGGKTLFMASRLNGQG…	At3g13180	XP_004251938.1	1	1	1	0.068	0.000438499	1	0	1	-	-	5	Cp	-	Cp	C	73.2	plastid	plastid	-
	Solyc10g005540	-	SAM-dependent methyltransferase (AHRD V1 ***- D2ELV5_PEDAC); contains Interpro domain(s) IPR010719 Putative rRNA methylase	MVQCEWNLKFSISPLLFSSKKSTISIAAFASSSELNGASISVAGAESSSSIPFFRDSPISGSMEQVMVEYVFGRKKATEVAHYVWKHIVQKGDAVVDATCGNGYDTLALLKLVADKTRRGRVYGMDVQKIALESTSSLLDQFASPDEKELVELFVMSHSQMEDIVPNDVAVRLVAFNLGYLPGGDKKIITRSETTVLALEAAKRILAPGGLISIVTYVGHPGGREEFEKIEEFASGLPVEAWNCCKLHTLNRPLAPMLLFLFKR	At1g16445	XP_004248341.1	2	3	2	0.668	0.00430761	3	0	3	Cp	60	4	Cp	possibly Cp	Cp	EX	61.9	-	plastid	-
tRNA synthetases & their complexes	Solyc01g111990	AlaRS	Alanyl-tRNA synthetase (AHRD V1 **** Q9FFC7_ARATH); contains Interpro domain(s) IPR002318 Alanyl-tRNA synthetase, class IIc	MTSLNFPKTGHGRDSILLFPTSCFQSKPFLPSSKGYRYSSGLIVRTQTLIYASSLSNGRTKIKGPREIQFVAKAQPVAVELVEGKLRDPQTSGDAIRQRFLDFYAARGHKVLPSASLVPDDPTVLLTIAGMLQFKPIFLGKVPREVPSAATSQKCIRTNDIENVGRTSRHQTFFEMLGNFSFGDYFKKEAIKWAWELSTSEYGLPADRLWISVYEDDDETFALWHDELGIPKERIKRLGEDDNFWTSGVTGPCGPCSELYYDFHPERGTSDVDLGDDTRFIEFYNLVFMQYNKKDDGSLEPLKQKNIDTGLGLERMARILQKVPNNYETDLIFPILEKAAELANVSYALAGDSTKTKLKIIGNADHMRAVVYLISDGVNPSNIGRGYVVRRLIRRVVRT…	At5g22800	XP_004231078.1	37	159	37	7.778	0.0501566	5	3	8	-	-	5	Cp	possibly Cp	Cp	C	99.1	plastid stroma mitochondria	plastid	-
	Solyc03g097290	ArgRS	Arginyl-tRNA synthetase (AHRD V1 ***- O23247_ARATH); contains Interpro domain(s) IPR001278 Arginyl-tRNA synthetase, class Ic	MRVSIDGSTWRCIALALPYYYRAATLPSSAALLLPPSPAVSGRLFNFTRTFSVSKPMGSQPEVLDWPANKVRQTFISFFQGKDHKEVQSSPVVPHNDPTLLFANAGMNQFKPIFLGIVDPNSPLSKLKRACDTQKCIRAGGKHNDLDDVGKDTYHHTFFEMLGNWSFGDYFKKEAIGWAWELLTQVYKLPSERIYATYFGGDEKSGLPADNEARDLWLKFLPPSRVLPFDCKDNFWEMGDTGPCGPCTEIHFDRIGNRDAASFVNNDDPTVIEIWNLVFIQFNREADGSLKPLPAKHVDTGMGFERLTSILQNKMSNYDTDVFLPIFDAIQKATGARPYSGKVGADDVDNVDMAYRVVADHIRTLSFAIADGSCPGNEGREYVLRRILRRAVRYGTEVL…	AT1G50200	XP_004235270.1	2	2	2	0.093	0.000599712	1	0	1	M		2	Cp	ER	Cp	C	99.2	plastid stroma mitochondria	mitochondrion	-
	Solyc12g008570	ArgRS	Arginyl-tRNA synthetase (AHRD V1 ***- O23247_ARATH); contains Interpro domain(s) IPR001278 Arginyl-tRNA synthetase, class Ic	MNSFAISLKIPPLLSLSPPPSAKLLNPNFSPFLLHTRVLRATSRRFFGAVGVSLRTISTMENDKEIIGSQKQQIAKLFEESLRAAFPDIPDVQPLVAICNDPKHGDYQCNNAMSLWNKIKGKGTQFKGPQPVGKAIIENLPASEMIENCSIAGPGFVNIVLARQWIAKSLQKMLIDGIETWAPKLPVKRTVVDFSSPNIAKEMHVGHLRSTIIGDTLARMLEFSNVDVLRRNHVGDWGTQFGMLIEFLYEKFPNWEAGNAPAIGDLEAFYKASKQRFDSDADFKERAQKAVVSLQGGDEKYRMAWAQICEISRKEFQKVYERLGVHLEEKGESFYNPYIPKALEMLNEKGLIEESEGARVIFIEGKKIPLIVVKRDGGFNYASTDLTALWYRLNEEKAD…	At4g26300	XP_004251643.1	18	59	18	3.375	0.0217637	5	3	8	Cp	40	1	Cp	possibly ER	Cp	V	96	plastid stroma	plastid	-
	Solyc03g019940	AsnRS	Asparaginyl-tRNA synthetase (AHRD V1 **** D6YS69_WADCW); contains Interpro domain(s) IPR004522 Asparaginyl-tRNA synthetase, class IIb	MAGALSPATTLRLKPFYAVRFFSHYRRPIKVLNPNFYSSYPPQLPPAPYLSRRRSFCSVVSAAISSGEAVERPKFENIEAKEGVKTEKVGEFRKRLRVADIKGGPEEGLDRLGETLVVRGWVRTVRAQSSVTFIDINDGSCLSNMQCVMGSDAEGYDQVENGLISTGASVWIEGTVVSSQGSKQKIELKVQKLVVVGKSDPSFPIQKKRVSREFLRTKAHLRPRTNTFGAVSRVRNALSYATHKFFQENGFVWVSSPIITASDCEGAGEQFCVTTLIPNSNEGGDSPVSAIPTTESGSVDWSQDFFGKRAYLTVSGQLNGETYATALSDIYTFGPTFRAENSNTSRHLAEFWMIEPELAFADLDDDMACATAYLQYVVQHVLENCKEDMDFFDTWIEKG…	At4g17300	XP_004234328.1	13	48	13	2.162	0.0139417	5	3	8	M	22	4	Cp	M	Cp	M	98.2	plastid stroma mitochondria	plastid	-
	Solyc01g106740	AspRS	Aspartyl-tRNA synthetase (AHRD V1 **** D8FUD3_9CYAN); contains Interpro domain(s) IPR004524 Aspartyl-tRNA synthetase, class IIb, bacterial/mitochondrial type	MSLFFRSLPTIAIRSKPSPLTSLPFFFINFHNPITHNPTSLINRTLSSTSVSASPTTPETVVVPNPKVSPSPNALQWVSRNQYCGELSEEDVGKRVRLCGWVALHRIHGGLTFVNLRDQTGIVQITTLPDDFPDAHSTVRDLRLEYVVAIEGVVRPRPAESVNKKMKTGTIEVAAEDVQVLNAVRLKLPFLVTTADDAKDSSKEEIRLRYRCLDLRRPQMSSNIILRHRVVKLLRRYLEDVHDFVEIETPILSRSTPEGARDYLVPSRVQPGTFYALPQSPQLFKQMLMVSGFDKYYQIARCFRDEDLRADRQPEFTQLDMEMAFTSMEDMLKLNEDLIRKVFQEIQGVQLPNPFPRLTYAEAMSRYGSDRPDTRFDVELRDVSDIFSNTTFKVFSDAL…	At4g33760	XP_004230674.1	15	40	15	3.417	0.0220346	5	3	8	Cp	63	2	Cp	M	Cp	M	94.5	plastid stroma mitochondria	plastid	-
	Solyc04g076390	CysRS	Cysteinyl tRNA synthetase (AHRD V1 **** D0FY60_BETVU); contains Interpro domain(s) IPR002308 Cysteinyl-tRNA synthetase, class Ia	MATLLKCYKPLLPFQRPKMHIAAAAVNSFRYYSRSRLRARCLSTIGNSKSTVDIKVVNSEGTETVLRKQQLWLHNTMSKQKELFIPKVPGKVGMYVCGVTAYDLSHIGHARVYVSFDVLYRYLNYLGYEVKYVRNFTDVDDKIIARANELGEDPIILSRRFCEEFHQDMAYLHCLPPSVEPRVSNADHMPQIINMIQQILDNGCAYRINGDVYFSVDKFPEYGTLSGRKLEDNRAGERVAVDTRKKHPADFALWKTAKAGEPFWESPWGPGRPGWHIECSAMSAAYLGYTFDIHGGGMDLVFPHHENEIAQSCAACRESNITYWIHNGFVNIDSQKMSKSLGNFFTIRQVIDFYHPLALRLFLIGTHYRSPINYTIVQIESASDRLFYIYQALYDCQIL…	At2g31170	XP_004238002.1	8	25	8	1.61	0.0103821	5	2	7	M	41	2	Cp	M	Cp	M	99.2	plastid stroma mitochondria	plastid	-
	Solyc01g112290	GluRS	Glutamyl-tRNA synthetase (AHRD V1 ***- Q52JJ5_NICBE); contains Interpro domain(s) IPR004527 Glutamyl-tRNA synthetase, class Ic, bacterial/mitochondrial	MATVAAAPWFRARLIPELKSRQSLLYCRNGPRRYPQSLCFRRRSFSIYASAGDEGAVRVRFAPSPTGNLHVGGARTALFNYLYARSKGGKFVLRIEDTDLERSTRESEEAVLRDLSWLGLAWDEGPGIGGNYGPYRQSERNALYKEFAEKLLQSGHVYRCFCSNEELEKMKEMAKLKQLPPVYTGRWASATEQEVLEELTKGTPYTYRFRVPKEGSLKIDDLIRGEVSWNFDTLGDFVIMRSNGQPVYNFCVTVDDATMAISHVIRAEEHLPNTLRQALIYKALGFPMPHFAHVSLILAPDRSKLSKRHGATSVGQFRDMGYLPQAMVNYLALLGWGDGTENEFFSLEQLVEKFTIERVNKSGAIFDSTKLRWMNGQHLRSLPSEELNQIIGERWKDAD…	At5g64050	XP_004231106.1	13	47	13	3.047	0.0196486	5	3	8	Cp	48	5	Cp	Cp	Cp	M	54.1	plastid stroma mitochondria	mitochondrion,plastid	-
	Solyc01g090200	GlyRS	Glycyl-tRNA synthetase beta subunit (AHRD V1 ***- D2PQC6_KRIFD); contains Interpro domain(s) IPR002311 Glycyl-tRNA synthetase, class IIc, beta subunit, N-terminal	MAILVLPLITSILKPHKTHFSFLPLPIILHRRFFSKSSTVSALSTSSSSSHVSHNSENQKKASVPTFQQAIQRLQEYWGSVGCAVMQCSNTEVGAGTMNPLTYLRVLGPEPWNVAYVEPSIRPDDSRYGENPNRLQRHTQFQVILKPDPGNSQDLFIRSLSALGIDVNAHDIRFVEDNWESPVLGAWGLGWEVWMDGMEITQFTYFQQAGSIQLMPVSVEITYGLERILMSLQGVNADHFKKIQYADGITYGELFLENEKEMSAYYLEHASVNADHIHKHFDLFEAEARRLLDLGLAIPAYDQLLKTSHAFNVLDSRGFVGVTERARYFGRMRSLARQCAQLWLQTRESLGHPLGVVSHSNADHLIVQREVSEEATGKVPSEPRLFVLEIGTEELPPND…	At3g48110	XP_004229742.1	30	174	30	8.067	0.0520202	5	3	8	Cp	73	2	Cp	possibly Cp	Cp	G	66.2	plastid stroma mitochondria	plastid	plastid
	Solyc03g119280	HisRS	Histidyl-tRNA synthetase 1 (AHRD V1 ***- D7LWN6_ARALY); contains Interpro domain(s) IPR015807 Histidyl-tRNA synthetase, class IIa, subgroup	MPAILNSSLFLLHHHSLFSTAVLSFRRHHRHLNVSLFSAPRTTLRAYSTSSSSFSIESSTNQNVRTGRSGSATSPPVEQDTVQKIDVNPPKGTRDFPPEDMRLRNWLFHHFREVSQQFGFEEVDFPVLESEALYIRKAGEEIRDQLYCFEDRGNRRVALRPELTPSLARLVIQKGKSVSLPLKWFAIGQCWRYERMTRGRRREHYQWNMDIIGVPDVTGEAELISSMITFFKRIGLTASDVGFKVSSRKVLQEVLRCYSVPENMFGRVCIIIDKIGKIPMDDIRKDLLSADMSEVAIEDLLQVLSLKSLAKLEEKLGASGEALSDLKQLFSLAEKYGYSEWLEFDASIVRGLAYYTGIVFEGFDREGKLRAICGGGRYDRLLSTFGGDDLPACGFGFGD…	At3g46100	XP_004235763.1	9	22	9	2.481	0.0159988	5	3	8	Cp	78	3	Cp	Cp	Cp	C	92.3	plastid stroma mitochondria	mitochondrion	-
	Solyc01g080810	IIeRS	Isoleucyl-tRNA synthetase (AHRD V1 ***- Q9FI67_ARATH); contains Interpro domain(s) IPR002301 Isoleucyl-tRNA synthetase, class Ia IPR018353 Isoleucyl-tRNA synthetase	MEATFFPKRITASKSLVFALARAKMAMQTSSYKLWSLKSCSSLREPTSVSLLNLRSSSSARVFSLMNMTRYSTYSNDDSCPSGKRRSRGPVMAAKKRSEGAKQDDGKYKDTVDLPKTAFGLRANSTVREPELQKIWDDNQVFKRVVERNNGGTFVLHDGPPYANGDLHMGHALNKILKDIINRYKLLQNFRVQYVPGWDCHGLPIELKVLQSLDDDARKELTPLKLRNKAAKFAKSTVQSQMASFKRYGVWADWDQHYLTLHPEYEAAQIEVFGQMAIQGFIYRGRKPVHWSPSSRTALAEAELEYNEEHVSKSMYAIFRLVGVPASCDSLKEFLPNLCLAIWTTTPWTIPANAAVAVNNKLQYAVVEVSSASVDGSTSSVDGKKRFGNFMKGDKSLHL…	At5g49030	XP_004229502.1	24	91	24	2.286	0.0147413	5	3	8	Cp	92	4	Cp	Cp	Cp	M	78.6	plastid stroma	plastid	plastid
	Solyc02g080980	LeuRS	Leucyl-tRNA synthetase IPR002302 Leucyl-tRNA synthetase, class Ia, bacterial_mitochondrial	MYDLHVEQKESTSILVDNQAAIAISNNPVFHKKTKHFNIKFYFLREVQQRGEVTLVYTKTLPISKFELLRQKIGVCSIQSKEECKESVLNRSKFNFTVLYDIDAVSTKEPFKCVINQGIILGEVQYTACKDDEGNLISADSVDELAEYKQERIPEEKVMKSGDLFVLKDNPNIRLIARAHKMSKSRGNVINPDDVVLEYGADSLRLYEMFMGPLRDSKTWNTSGIDGVHRFLARSWRLVVGSASPTGSYLDGTVTVDEKPSIEQLRSLHRCIDKVTEEIEGTRFNTGISAMMEFIAYKWDKLPRSIIEAFVLLLSPYAPHMAEELWSRLGHSNSLAYEPFPKADTAYLKESTVVLPVQINGKTRGTIQVEETCTEEEAFRLASFDTKLSKFLDGKSIRK…	At4g04350	XP_004232688.2	7	25	7	1.818	0.0117234	5	3	8	-	-	1	-	-	Cp	C	62.8	plastid stroma	plastid	plastid
	Solyc02g080990	LeuRS	Leucyl-tRNA synthetase IPR002302 Leucyl-tRNA synthetase, class Ia, bacterial_mitochondrial	MGEKGLWQQMDSWINGAGLHVGHPLGYTATDILARFKRMQGFNVLHPMGWDAFGLPAEQYAIDTGTHPKITTLRNISRFRSQLKSLGFSYDWDREISTTEPDYYKWTQWIFLQLLKRGLAYQAEVPVNWCPALGTVLANEEVIDGVSERGGHPVIRKPMRQWMLRITAYADRLLEDLDDLDWPESIKEMQRNWIGRSEGAELDFVVINGNSQEEEKRITVYTTRPDTIFGATYLVLAPEHPFLSSLVSEAQSKHVEEYREHAFRKSDLERTELQKEKTGVFTGCYAKNPANGQAVPIWVADYVLGSYGTGAIMAVPAHDTRDFEFAMKYTIPISWVVRPDDSNCGNFEKPYSGEGSMINSSYSESGLDINGLPSKEAASRVVQWLEKSGNGKKKVNYKL…	At4g04350	XP_010316571.2	6	15	6	2.162	0.0139417	5	2	7	-	-	3	-	-	Cp	M	62.64	plastid stroma	plastid	plastid
	Solyc02g081000	LeuRS	Leucyl-tRNA synthetase (AHRD V1 *-*- D5H7P2_SALRM); contains Interpro domain(s) IPR002302 Leucyl-tRNA synthetase, class Ia, bacterial/mitochondrial	MNSGPNSLNRVSPAKPKPKHMLTLSKLLLINKLPPSNCQTTATSSLPFSPIAMPIQLHTSTRLHHLPSHLLPRPPLLRSALLLPACRRPLLRREFCNHERFGVSNCTKSSSKNTVTVLVNAIDGQKINEKHEKVKRAYPFHEIEPKWQHYWEENKTFRTPDEIDTSKPKFYVLDMFPYPRYGLFYSHSFNFKLLCAKDGLWSIFF	At4g04350	XP_010316571.2	2	3	2	0.359	0.00231502	2	0	2	Cp	37	5	Cp	-	Cp	Cp	33.7	plastid stroma	plastid	plastid
	Solyc01g005540	LysRS	Lysyl-tRNA synthetase (AHRD V1 ***- B9SBP3_RICCO); contains Interpro domain(s) IPR002313 Lysyl-tRNA synthetase, class II	MEALQPLKQLIHFTSLRFRPSSSSFFIVRCCSSTTTEVTGRAAGGGRNRRSSSGTSTSTSDKEAIRAIRIKKVEELRSNGLEPYAYKWDRTHSASQLQEIYKNLGNGEESKSENDYVSISGRIVARRAFGKLAFLTLRDDSGMIQLYCEKERLLSDQFDQLKTLVDIGDILGANGSIKRTEKGELSVCVNSFSILTKSLLPLPDKYHGLTDIDKRYRQRYVDMIANPEVADTFRKRAKIVSEIRQSVESFGFLEVETPVLQGAAGGAEARPFITFHNSLGRDLYLRIATELHLKRMLVGGFEKVYEIGRIFRNEGISTRHNPEFTTIEMYEAYSDYESMMNMAEEIVTRCALAVNGKLKIDYQGVEICLERPWRRETMHNLVKEATGIDFKNFEDDLKA…	At3g13490	XP_004228608.1	11	33	11	1.297	0.00836373	5	3	8	Cp	66	3	Cp	possibly Cp	Cp	M	98.4	plastid stroma mitochondria	mitochondrion,plastid	-
	Solyc05g054600	MetRS	Methionyl-tRNA synthetase (AHRD V1 **** B2J3G3_NOSP7); contains Interpro domain(s) IPR002304 Methionyl-tRNA synthetase, class Ia	MACRVQHSIQSSFWFLSSTPFRNTLNPRKNFFKNRISFGKELFFSSSSRTALYCTCSSSSSGGGDKDVFLTNGVGGDDSFVLTTPLYYVNAPPHMGSAYTTIAADAIARFQRLLEKKVIFITGTDEHGEKIATAAAANGSSPNEHCDVVSQAYKALWKDLDISYDKFIRTTDPKHEAVVKEFYSRVLANGDIYRADYEGLYCVNCEEYKDEKDLLDDNCCPTHLKPCVKRKEDNYFFALSKYQQQLEEVLKQNSGFVQPSYRLNEVQGWIKNGLKDFSISRASVDWGIAVPNDSKQTIYVWFDALLGYVSALLEDSELASLDTAISSGWPASLHLIGKDILRFHAVYWPAMLMSAGIGLPKMVFGHGFLTKDGMKMGKSLGNTLEPTDLVQRFGPDAVR…	At3g55400	XP_004239780.1	20	78	20	6.814	0.0439402	5	3	8	Cp	55	3	Cp	Cp	Cp	C	97.4	plastid stroma mitochondria	plastid	-
	Solyc05g056260	PheRS	Phenylalanyl-tRNA synthetase alpha chain IPR004530 Phenylalanyl-tRNA synthetase, class IIc, mitochondrial	MQLHRRNQHPLGILKIYDYFDTNYPDKFDKFDDLCPIVSVRQNFDEVLVPANADHISRSYNDTYYVDSQTVLRCHTSAHQAELLRNGHTHFLVTGDVYRRDSIDSTHYPVFHQMEGVRVFAPNDWEGSGTDATSHAAEDLKKCLEGLARHLFGGVEMRWVDTYFPFTNPSFELEIYFQDQWMEVLGCGVTEQEILKRSGKTDNVAWAFGLGLERLAMVLFDIPDIRLFWSTDERFTSQFSSGRLGLKFKPFSKYPPCYKDMSFWISDSFTENNLCEVVRGIAGDLAEEVKLIDNFTNKKGMTSHCYRIAYRSMERSLTDEEINDLQWKVREQVENKLKVVLR	At3g58140	XP_004239652.3	14	68	14	7.913	0.0510271	5	3	8	-	-	4	-	possibly ER	Cp	C	98.94	plastid stroma mitochondria	plastid	-
	Solyc01g096870	ProRS	Prolyl-tRNA synthetase (AHRD V1 **** Q7XZD2_RAPSA); contains Interpro domain(s) IPR004499 Prolyl-tRNA synthetase, class IIa, prokaryotic-type	MGALRLPALTSIFTSSSSVRSSPAILPLKHRLRLPLRRPFSAQSTTEKVVAPELGDGKGKVVDKEKDRVITPRSQDFNAWYLDVIANAELADYGPVRGTMVIRPYGYAIWEAIQEYMNVKFKETGHSNMYFPQFIPYSFIEKEASHVEGFSPELALVTVGGGKELEEKLVVRPTSETIVNHMFTQWIHSYRDLPLMINQWANVTRWEMRTKPFIRTLEFLWQEGHTAHATAEEAEEEAMQMIDVYTKFAYEQAAIPVIAGRKSRVETFAGASTTYTIEAMMGDRKALQAGTSHNLGQNFSRAFGTQFTDENGQRQHVWQTSWAISTRFVGGIIMTHGDDAGLLLPPRLAPVQVIIVPIWKKDNEKAGVLTASSSVKESLQAAGIKVKIDDSDQRTPGWK…	At5g52520	XP_004230061.1	17	120	17	9	0.0580367	5	3	8	Cp	50	4	Cp	Cp	Cp	C	44.2	plastid stroma mitochondria	plastid	plastid
	Solyc04g074630	SerRS	Seryl-tRNA synthetase IPR018156 Seryl-tRNA synthetase, class IIa, C-terminal	MTKGTGFLLITTVLIISKSLGLCVAFLELQFVHRSNTFEVEKLRAERVANKMKGKLESSERQKLIEEGKNLKEELVTLEENLLKLTDELQQEAQSIPNMTHPDVPLGGEDSSTVRKMVGKPAEFSFAIKNADHVQLGKELDLFDFDAAAEVSGSKFYYLKNEAVILEMGLVNWAVSEAMKRGFTPLTTPEIVRSSVVEKCGFQPRGTNTQVYSIENSDQCLIGTAEIPVGGIHMDSILSESSLPLKYVAFSHCFRTEAGAAGAATRGLYRVHQFSKVEMFILCRPDESDSYHKELIEIEEELFSSLGFHFKTLDMASEDLGAPAYRKFDVEAWMPGLGRYGEISSASNCTDYQSRRLGIRYRPESSSASLKKGKAPTQFVHTLTACAVPRMIVSLLENF…	At1g11870	XP_004237941.1	9	44	9	4.012	0.0258715	5	3	8	S	-	1	-	ER	Cp	Cp	49.21	plastid stroma mitochondria	mitochondrion,plastid	-
	Solyc04g074590	SerRS	Seryl-tRNA synthetase (AHRD V1 *-*- B6TBG7_MAIZE)	MVLHCCFTGTTLHSLKLAAIPYFSRTLTSRLTPYYPRPLFPLAVRSLSAAAVVQTAATSTDEYQVVKPQWKAAIDFKWIRDNKDSVAVNIKNRNSNANLELVLQLYEKLLNVQKEYNADHFSFDSVMNGPRPVIAKQANTILSGYVWYPG	At1g11870	XP_004237941.1	3	5	3	1.371	0.00884092	4	1	5	M	46	3	Cp	Cp	Cp	Cp	75.7	plastid stroma mitochondria	mitochondrion,plastid	-
	Solyc05g005800	ThrRS	Threonyl-tRNA synthetase (AHRD V1 ***- Q17LW8_AEDAE); contains Interpro domain(s) IPR002320 Threonyl-tRNA synthetase, class IIa	MLLASPLCWRLFTQSIRRPPPPCKHFSILRRCFSSTPPMGKTAKSCEANSSASIPKDETYLENVIPKRIALFESIQNQQRLQRLALSPDPIKIELVDGTIKEGKKWNTTPLDIAKEISKSLAANALIAKVNGVLWDLSRPLEGDCKLEIFKFETDEGRDTFWHSSAHILGESLERTFGCKLCIGPCTTRGEGFYYDAFYGDLGLNENADHFQRIKEEATKAVSEKQPFERIEVSRQQALDMFSDNRFKVEIIKDLPEDKTITVYRCGPLVDLCRGPHIPNTSFVKALACTKASSAYWRGDKDRESLQRVYGISFPDQKQLKVYLDMLAEAKKYNADHRELTKKQELFFFHPLSPGSCFFLPHGARICNKLLEFIKSQYWKRGYKEVWSPNMYNMQLWET…	At5g26830	XP_004238685.1	2	5	2	0.11	0.000709337	3	3	6	M	33	5	Cp	possibly M	Cp	M	99.8	-	mitochondrion,plastid	-
	Solyc07g048080	ThrRS	Threonyl-tRNA synthetase (AHRD V1 **** D9ZHD6_HYPPE); contains Interpro domain(s) IPR002320 Threonyl-tRNA synthetase, class IIa	MKYVGALGKTMALSLSSRSLFTSSYKSISPLSRNPFSSFPIRQYRILFVLDPSNNNNNNKTNRNKLLRRRTSFSTHASTALQEAPAPNEKMVLPTNESSDGLLRIRHTCAHVMAMAVQKLYPNAKVTIGPWIDNGFYYDFDMEPLTDSDLKRIKKEMDRIISRNLPLVREEVSRDEAQRRIMSINEPYKIEILESIKEEPITIYHIGDEWWDLCAGPHVETTGKINRKAIELESVAGAYWRGDVKKPMLQRIYGTAWENEDQLKAYLHFKEEAKRRNADHRRIGQDLDLFSIQDEAGGGLVFWHPKGAIIRHIIEDTWKKIHMERGYDLLYTPHVAKADLWKISGHLDFYKENMFDQMEIEEELFQLRPMNCPYHVLIYKRQLHSYRDFPIRVAELGTV…	At2g04842	XP_004243537.1	15	53	15	2.162	0.0139417	5	3	8	Cp	76	3	Cp	M	Cp	M	90.1	plastid stroma mitochondria	mitochondrion,plastid	-
	Solyc12g095850	TrpRS	Tryptophanyl-tRNA synthetase (AHRD V1 ***- B4AZK3_9CHRO); contains Interpro domain(s) IPR002306 Tryptophanyl-tRNA synthetase, class Ib	MGCSLLSHFSMVTYSAPRFVSSTSSGLSIGGYLrRNATRMIRQQAGGDFRCFCSSVAVSEPVNSESSSSPVRKRIVSGVQPTGSIHLGNYLGAIKNWIRLQDTYETFFFIVDLHAITLQYEAQQLLKATRDTAAIYLACGVDPSKASVFVQSHVRAHVELMWLLSSATPIGWLNRMIQFKEKSRKAGDENVGVALLTYPVLMAADILLYQSDLVPVGEDQKQHLELTRELAERVNYLYGGRKWKKLGGRGGALFKVPEPLIPPTGARIMSLTDGLSKMSKSAPSDQSRINLLDSKDVIANKIKRCKTDAFPGLEFDNAERPECNNLLSIYQLVSGKTKQEVAEECRDMNWGTFKIVLTDALVNADHLHPIQVRYEEIISDSSYLDEVLAEGARKAADIA…	At2g25840	NP_001335038.1	5	25	5	2.162	0.0139417	5	3	8	Cp	40	4	Cp	Cp	Cp	Cp	72.8	plastid stroma mitochondria	plastid	plastid
	Solyc07g008530	TyrRS	Tyrosyl-tRNA synthetase (AHRD V1 ***- A4RSR2_OSTLU); contains Interpro domain(s) IPR002307 Tyrosyl-tRNA synthetase, class Ib, bacterial/mitochondrial	MAAAGAGAINSGLRSLLLNTTLRPFTSSLLRILPLPTYVFLPNTPSRHNFSHRPFCSISPLPASQEDIFSKPNSKSRPNVLHILEERGLLESVTSDSLRSVCSDPNLGPLKVYCGFDPTAESLHLGNLLGIIVLSWFLRCGHNAVGLIGGATGRIGDPSGKSLERPELDLVTLEKNISGIAGIVKKILVCSPGVCENAREVQILNNYDWWKDVKFLDFLRNVGRHARVGTMMSKESVKKRLENAEQGMSYAEFTYQLLQGYDFVHLYEKEGVNVQIGGSDQWGNITAGTDLIRRLVGKSSDNGAVVGSVPVVFGLTFPLLLKSDGTKFGKSEDGAIWLSASLLSPYKFYQYFFTVPDDDVVRFLKILTFLSIEEIAELEKDMGKPGYVPNTAQRRLAEE…	At3g02660	XP_004242803.1	14	40	14	4.754	0.0306563	5	3	8	Cp	94	5	Cp	possibly Cp	Cp	M	76.8	plastid stroma mitochondria	plastid	-
	Solyc09g007540	ValRS1	Valyl-tRNA synthetase IPR002303 Valyl-tRNA synthetase, class Ia	MADSESKSHETGKNCKPEAAASEGKQLTPEELEKKKKKEEKAREKELKKLKAAQKAEAAKQAQASSTVSKTAKKKSSKRDGGEENPEDFVDPETRLGEKKKLSREMAKTFNPSAVEKSWYAWWEKSNFFVADPNSAKPPFVIVLPPPNVTGALHIGHALTAAIEDTIIRWRRMSGYNTLWVPGMNADHAGIATQVVVEKKIMRERNLTRHDIGREKFVAEVWNWKNEYGGTILQQLRRLGASLDWSRECFTMDEKRSKAVTEAFVRLSNEGLIYRAPRMVHWDCVLRTAISDIEVEYTDIKERTLLNVPGYEEPVEFGLLTSFAYPLEGDLGEIVVATTRIETMLGDTAIAIHPEDKRYSHLHGKFAIHPFNGRQLPIVCDDILVDMNFGTGAVKITPA…	At1g14610	XP_004246671.1	2	3	2	0.093	0.000599712	3	0	3	-	-	3	-	-	not Cp	N	95.5	-	-	-
	Solyc12g019100	ValRS2	Valyl-tRNA synthetase (AHRD V1 ***- A7NGB2_ROSCS); contains Interpro domain(s) IPR002303 Valyl-tRNA synthetase, class Ia	MKLLCPVAPGCEVSTMAVCTSSFLSSSSSCHSLCFRFNPLLFSSASRRRSTLPLSRSRLRGYRFFAISEEAEGSGVFSSPEVAKSFDFSNEERIYKWWESQGYFKPNIVKGSDPFVIPMPPPNVTGSLHMGHAMFVTLEDIMIRYNRMKGRPTLWLPGTNADHAGIATQLVVERMLATEGVKRADLGRDEFTKRVWEWKQKYGGTITNQIKRLGASCDWTREHFTLDEQLSRAVVEAFIRLHEKGLIYQGSYMVNWSPNLQTAVSDLEVEYSEEPGSLYYIKYRVAGGSKSDFLTIATTRPETLFGDTAIAVNPQIFWVIRWSSYLPLIYTYH	At5g16715	XP_010313997.1	5	18	5	3.329	0.0214671	5	3	8	Cp	68	1	Cp	Cp	Cp	C	86.3	plastid stroma	plastid	plastid
	Solyc12g019110	ValRS2	Valyl-tRNA synthetase IPR002303 Valyl-tRNA synthetase, class Ia	MLCLLSILSHCMPSCFYEDLTQQKLDERYAKYIGKQAIVPLTFGRHVPIISDKYVDKDFGTGVLKISPGHNADHNDYLLARKLGLPILNVMNKDGTLNEVAGLYAGLDRFEARKKLWSDLEETGLAVKKETHTSRVPRSQRGGEIIEPLVSKQWFVTMEPLAERALEAVSNGELNIMPERFEKIYKHWLSNIKDWCISRQLWWGHRIPVWYVSGKDCEEEYIVARNYREALTKAQEKYGKNVEIYQDPDVLDTWFSSSLWPFSTLGWPDESAEDFKRFYPTSVLETGHDILFFWVARMVMMGIEFTGTVPFSNVYLHGLIRDSQGRKMSKSLGNVVDPLDTIAEYGTDALRFTLALGTAGQDLNLSTERLSSNKAFTNKLWGKFILRNLPRQDDTPAWE…	At5g16715	XP_010313997.1	20	58	20	4.946	0.0318944	5	3	8	S	-	5	-	-	Cp	Cp	52.14	plastid stroma	plastid	plastid
	Solyc08g015960	-	Aminoacyl tRNA synthase complex-interacting multifunctional protein 1	MAVMGIGAANWLKGSGALLLSCRTNSIPAVVSSCTVIASRSRVHYCSSTFSLQHQKKNNTLFSSGVNGHKIGDWGSQVTKLYFNFYCTASSNVSIEEKDSSGEVVEEDEESKMRKIKDAANSLDIRVGRIIKAWRHEEADSLYVEEVDVGEAEPRIICSGLVKYVPLNADHLQERSVIVLANLKPRNMRGVKSNGMLMAASDASHENVELLEPPEGAVPGERIWFGSADEKDNLPDVATPNQVAKKKIWELVQPHLKTDGASVAALGTHCMRASTGVVVSPSLKDANIS	At3g59980	XP_004244789.1	9	67	9	7.66	0.0493957	5	3	8	Cp	88	4	Cp	possibly M	Cp	C	59.4	plastid stroma	plastid	-
tRNA modification	Solyc01g068290	-	tRNA uridine 5-carboxymethylaminomethyl modification enzyme mnmG (AHRD V1 ***- B4VZ14_9CYAN); contains Interpro domain(s) IPR004416 Glucose-inhibited division protein A	MATVLSLNWTRFASQVPRSFSSPFLRKHSQFIRLYRSFQFSGSLCTLYSSSRRPFTVVASSSPSNGSSSYAEVGDERYDVIVVGGGHAGCEAALASARLGAKTLLLTLNIDRIAWQPCNPAVGGPAKSQLVHEVDALGGDIGKIADRCYLQKRVLNISRGPAVWALRAQTDKREYALEMKKIVESTPNLFIREAMVTDILLGKNDNVEGVCTFFGMNFYAPSVILTTGTFMSGKIWIGRTSMPAGRAGESASVGLTENLQRLGFETDRLKTGTPARVDSRTVDFSGLEPQYGDEEVSWFSFDANYHIEREQMCCYLTRTTKSTHQLIRDNLHETPTYGGWVEAKGPRYCPSIEDKIVRFQDKESHQIFLEPEGRSVPELYVQGFSTGLPERLQLPLLRT…	At2g13440	CAD5318421.1	2	5	2	0.199	0.00128326	3	0	3	Cp	58	4	Cp	Cp	Cp	M	90.1	-	plastid	-
	Solyc12g096390	-	putative peptidyl-tRNA hydrolase PTRHD1 [Solanum lycopersicum]	MGTPFCSRYASLNFTHFSPSLAPAIQLTFSTTFRRRNVGVVSRMESTSISPSGGSGTTAVSAIAAGGDATTTGSNSTEESSITDTVVQYVVLRRDLIDTWPLGSVVTQGCHAAVAAIWSHKDDAVTLQYCSPSNIDSMHKVTLEVKGETQILNLAEKLKAGGIAHKLWIEQPENIPTCLATKPYPKSLVSSFFKKLKLCK	At5g10700	XP_004253060.1	1	1	1	-	0	0	3	3	Cp	61	3	Cp	Cp	Cp	Cp	97.9	-	-	-
	Solyc10g007840	GATA	Glutamyl-tRNA (Gln) amidotransferase subunit A (AHRD V1 ***- A8YF31_MICAE); contains Interpro domain(s) IPR004412 Glutamyl-tRNA(Gln) amidotransferase A subunit	MLSSVQTPRLLRFQSFTLKCLHTHPTTTPPPPHSQILTIRKSLLSREISAVDLAGTFLNRLRNTEPQLKSFLYVSDVVLKEAEEIDRKIAENEELGPLAGVLVGVKDNICTSDMPSTAGSKILENYRPPFDATAVGKMKKCGAIVignaKTNMDEFGMGSTTEGSGYQVTANPWDLSRVPGGSSGGSAAAVSARQCMVSLGSDTGGSVRQPASFCGVVGLKPTYGRVSRYGLVAYASSLDVignaCFGSSVTDAAILLHAISGHDKFDATSSKKEVPDFASQFTARNADHLDSKPLKGLRVGLIRDTIEDGVDPDVISSIRGAASHLEELGCTVTEVSLPSFSLGLPAYYILASSESSSNLSRYDGVRYGKQVFADELNSLYGESRAGGLGAEVKMRIL…	At3g25660	XP_004248204.1	7	28	7	1.637	0.0105562	5	3	8	M	14	4	Cp	M	Cp	M	82.1	plastid stroma mitochondria	plastid	plastid
	Solyc09g090840	GATB	Aspartyl/glutamyl-tRNA (Asn-Gln) amidotransferase subunit B amidotransferase, B subunit	MALTFFRGIQLNPSMLYPSSYFARKHGVLYCCMRSAQTQTATQEKEQTKLKGSTQSQPKAVDKFLKDFEAVignaIETHVQLSTLTKAFCSCPYNYGSPPNTSVCPVCMGLPGALPVLNSKVIECAVRVGLALNCKLSLNSKFDRKQYFYPDLPKGYQISQFDIPIASGGYLDVDLPLEYGGGHRKFGITRVHMEEDAGKLLHTDGGSYSQERTPPSYIRIPPPPPASHCNVIAIDVDLNRAGVPLLEIVSEPDMRTGIEAAEYAAELQRLVRYLGVGNGNMQEGSLRCDVNISVRPIGQLEFGTKVEIKNLNSFSSMSRAIDYEISRQVELHNQGQIDQIVQETRLWEEGAQKTVTMRKKEGLADYRYFPEPDLPGVSLTEEYVNSIRESLPELPEDK…	At1g48520	XP_010326798.1	19	58	19	5.31	0.0342416	5	3	8	M	35	2	-	possibly M	Cp	Cp	71.49	plastid stroma mitochondria	plastid	plastid
	Solyc07g063140	GATC	Aspartyl/glutamyl-tRNA(Asn/Gln) amidotransferase subunit C (AHRD V1 ***- A3IGR0_9CHRO); contains Interpro domain(s) IPR003837 Glu-tRNAGln amidotransferase, C subunit	MGSISALHYLKPTRTANGTSLFNFSKNRISRLPVAFRSYTVKSSVLEPPDVPRLAETARISLNPQEIEEFAPKIRQVVDWFGQLQAVDLQSIEPAIRANTEGDNLRGDVPEKFENREELISAVPSFEDPYIKVPKVLNKE	At4g32915	XP_010324364.1	3	11	3	1.783	0.0114977	5	0	5	Cp	37	5	Cp	possibly M	Cp	Cp	74.5	plastid stroma mitochondria	plastid	-
	Solyc08g079240	-	Dimethylallyl, adenosine tRNA methylthiotransferase	MAAAFSSSFTSSAIGAQFYRPKFVKPKTFVNTIRCAGRLEWDPDGLLGPPQTGHIARLEFQRRLENDAAAREEFERQVREEKERRRVLRESRVIPDTVEGLVEFFLDTEAQEIEFEIARMRPRLNKEFFNADHLQVELGKLRFSVNKTQAVEDRLFELEALQKALQEATEAYDKLQADLVATKKNLTEILTSKDVKATLLDLVERNALNRPLLTLLDENIATAHSVNQKQAAEYMEKLRGLVLKYLTV	At1g62780	NP_001296943.1	10	49	10	14.849	0.0957541	5	3	8	Cp	34	3	Cp	Cp	Cp	Cp	53.7	plastid stroma	plastid	plastid
	Solyc02g093460	-	tRNA pseudouridine synthase B (AHRD V1 *-*- D0MI93_RHOM4); contains Interpro domain(s) IPR020103 Pseudouridine synthase, catalytic domain	MAKSVVIPRMSLIFLRSKSISQPRTVFFPSMLNSLLLKSHSLHFFSTTSTPYPLQYEMIISRPANPPSPTLKSRQQRFLPKSKPNDSEPLPGSELGFDDWVDRKLNLKSSSPQAEPQPEEPNSGIMEMDKGKRKYYNKRRKRMFGGSDSEDENNRDKDNELVELKQEVVELPTLHKKEEELYFYDNFAYPWEKDKHYKMVYQLEKKFFPDQGFDKAFLDPGQSNENVNRSKKKLGKKENLIEKDIDGGDGKSLIFFEEEEKSVSSETKKEAKVDVAEKKVEDFFKCLKKVPNKENGVVSAEPFLATRSTGLPPKWDSPGGTVVLVNKPKGWTSFTVCGKLRRLTKVKKVGHAGTLDPMATGLLIVCVGKSTKIVDSYQGMTKGYSGIFRLGEATSTWDA…	At5g14460	XP_004231838.1	2	3	2	0.16	0.00103176	2	0	2	Cp	70	3	Cp	ER	Cp	M	49.2	plastid stroma	-	-
	Solyc12g037970	-	Peptidyl-tRNA hydrolase family protein (AHRD V1 ***- D7KGE1_ARALY); contains Interpro domain(s) IPR001328 Peptidyl-tRNA hydrolase	MKVACVISSTASSATVLCRCGRSLFSSFSVAKTLNSSSFRRGWMSNTAAAGSLYQISCSMTTQTSPPDTPAIIAPLPEKPKPKPQPWLIVGLGNPGKRYAGTRHNVGFEMIDTIADAEGISMGSVSFKAQFGKGFIGDVPIMLAKPQTFMNASGESVGAIVSYYKIPLKQVLVVFDDLDLPFAKLRLLPKGGHGGHNGMRSIMNHLKGNRDFPRLRIGIGRPPGKMDPASFVLRAFNRQEREELDFTLQNGLEAMRILVLEGFDKSATFVNSSKPLTV	At1g18440	XP_004252240.1	1	1	1	0.233	0.0015025	1	0	1	Cp	57	2	Cp	possibly Cp	Cp	Cp	99.4	plastid nucleoid	plastid	-
	Solyc02g091290	-	Methionyl-tRNA formyltransferase (AHRD V1 ***- B9GV84_POPTR); contains Interpro domain(s) IPR005794 Methionyl-tRNA formyltransferase	MLSSSVMIRRFCSFNVTASSSAITSTTKKKRLVFLGSPQVSASVLDALFNASAAPDSLFEITAIVTQPPSGRDRGRKVMPSPVAQHALDRGFPSDLIFTPVKAGEEAFLFNFKSLEPELCVTAAYGNILPTKFLNIPSKGTVNIHPSLLPLYRGAAPVQRALEDGVKETGVSLAYTVRKLDAGPVIACERVTIDDQIKAPDLLDLLFNLGSKLLIRELPSIFDGSASGIAEEQDDSKATLAPKITPEESWLSFDDDAQVLHNKVRAFAGWPGTRARLKVIDPNNGESSIIELKIITTRIYGGINSQDIEANDVLFTKSSLVIPCGGGTALEVLEIQLPGKRAVNAAAFWNGLRGQMLKKL	At1g66520	XP_010316070.1	5	11	5	1.581	0.0101951	4	3	7	Cp	41	4	Cp	M	Cp	M	96.9	plastid	mitochondrion	-
	Solyc04g072770	-	tRNA methylase	MALLPALRHLFTHLRSPATSIALSICPRLSIPIHTTLSSLFPLSSSSSSQPTAKHHAISKESTLVLKQDERLSVSGTVSALDPAVNTSTIAAIVTSLGGPAAAVGIIRLSGPSAVPIVGRVFHPKVKKKKRSSSEWRPSSHVVEYGFVSDSHGNVIDEVLVVPMLAPKSYTREDVIELQCHGSEVCLQRVLRACLEAGAKLAEPGEFTLRAFLNGRLDLSQAENVEKLISAKSVAAADAALAGIEGGFSSLVKSLRTQCMELLTEIEARLDFDDEMPPLDLNLIMDKIYGMLHDLDNALETANYDKLLQSGLQIAIIGRPNVGKSSLLNAWSKTDRAIVTNIAGTTRDVVEASVSVRGVPVTLLDTAGIRETDDIVEKIGVERSEAVARNADVVIMTIS…	AT1G78010	XP_004237883.1	1	1	1	0.101	0.0006513	1	0	1	M		5	Cp	M	Cp	M	71	plastid	mitochondrion	-
	Solyc12g015710	-	tRNA methyltransferase 4E; contains Interpro domain(s) IPR001678 Bacterial Fmu (Sun)/eukaryotic nucleolar NOL1/Nop2p	MQKIGSISDTVMEILNFPASSFFSDQHAHTIMPILFSGRTLHFPKLSATSSSSSESHNSKQVKFAKKISQNSATSVRRAGSGSPLRKTHKLNLEVSPHRAVSAVRLMRIELGGAFADLLNEQGKGSGDNEMGYVERTLGFRTRDLDDRDLRLVTEVVGGTIRWRRYLNADHLILSLCHDERTFRSMEPLLVQILRIGFYEITKLDMPPYAVVDESVRLAKVALRPGAGNLVNGILRKLAVLKESDSLPAVEVNGDDRQQARGLATLYSHPVWMVRRWTKYFGQDEAIKLMTWNNSYPSFSLRANTGKGLTGADLVSRLNMLKVPHEPSLYLDDFVRLKTGMQNVIQAGLLKEGFCAVQDESAGLVVSIVDPQPGENIIDCCAAPGGKTLFMASRLNGQG…	At3g13180	XP_004251938.1	1	1	1	0.068	0.000438499	1	0	1	-	-	5	Cp	-	Cp	C	73.2	plastid	plastid	-
A Proteins were identified by acetone preparations and/or the gel method. For emPAI and Mol% calculations, only the data from the acetone prepartions were used. Proteins identified solely by the gel method have data for the number of peptides, PSMs and unique peptides.
B Names of tomato proteins were based on the literature, NCBI annotation (identified in BlastP searches), and/or SolyGenomics descriptor. In a small number of cases, tomato protein names were assigned based on NCBI annotations and the Arabidopsis homolog.
C Some Sol Genomics descriptors were updated when NCBI annotations and Arabidopsis gene annotations were aligned.
D Target P's subcellular locations are: chloroplast (Cp), mitochondria (M), secretory (S), and no predicted location is indicated by a dash (-).
E ChloroP was used to predict the presence of a chloroplast transit peptide (Y) and the lack of a predicted transit peptide is indicated with a dash (-).
F Predotar's predicted subcellular locations were: chloroplast/plastid (Cp),endoplasmic reticulum (ER) or mitochondrion (M). For proteins with localization predictions that were less clear, Predotar provided categorized of possibly Cp, M and ER. Proteins with unresolved locations or that did not have a homolog detected by Predotar are indicated with a dash (-).
G WoLF PSORT's and YLoc's predicted subcellular locations were: chloroplast/plastid (Cp), cytosol (C), cytoskeleton (Cy), endoplasmic reticulum (ER), extracellular (EX), golgi apparatus (G), mitochondrion (M), nucleus (N), peroxisomes (P), plasma membrance (PM), and vacuole (V). Proteins with no chloroplast location in WoLF PSORT are indicated by not Cp.The number of proteins predicted to be in t…

## Sheet: Tabel S10B-import
Table S10B. Protein import and targeting
Gene and protein descriptors							ProteomicsA								Algorithms								Databases
Category	Tomato Gene ID	Gene nameB	DescriptionC	Protein Sequence	Arabidopis homolog	Tomato proteinB NCBI accession	Peptides	PSMs	Unique Peptides	emPAI	Mol%	Acetone samples	Gel samples	Total	TargetP D ver.1	Transit peptide length	TargetP (reliability class)	ChloroP E	Predotar F	WoLF PSORT G	YLoc G	YLoc % Confidence	PPDB	SUBA4	plprot
Translocases & signal recognition particles	Solyc01g091580	FtsY	Signal recognition particle-docking protein FtsY (AHRD V1 ***- A7H885_ADF); contains Interpro domain(s) IPR004390 Cell division transporter substrate-binding protein FtsY	MASTLSSRLPRLPSKTVFPHSNSGSTLLHFTSKTRFDQSRFRCSAGQTGFFTKLGRLLKEKAKSDVEKLFSGFSKTRDNLAVIDELLLYWNLSDTDRVLDELEEVLLVADFGPKITIKIVESLREDIYAGKIKSGSEIKSVLKKSILDLLTSKAPKTELSLGFRKPAVIMIVGVNGGGKTTSLGKLANRLKREGAKILLAAGDTFRAAASDQLEIWAERTGCEIVVAEKEKAKASSVISQAVKRGKEEGFDIVLCDTSGRLHTNYSLMEELVACKKVVSKIVNGAPNEILLVLDGTTGLNMLPQAREFNEVVGITGLILTKLDGSARGGCVVSVVDELGIPVKFVGVGEGVDDLQPFNAEEFVDAIFP	At2g45770	XP_004229830.1	4	9	4	0.551	0.00355313	5	2	7	Cp	42	4	Cp	Cp	Cp	C	94.3	thylakoid-peripheral-stromal-side	plastid	-
	Solyc09g009940	SRP54	Signal recognition particle protein (AHRD V1 ***- B0CBK0_ACAM1); contains Interpro domain(s) IPR004780 signal recognition particle, SRP	MEATASFTSTMASHHFFPLSKATLSSSKLNPTCNSSSSWIGSTHSLSFSSRNSFTRDTWRVINSKNVVRREMSGVIRAEMFGQLTSGLENAWNKLKGEEVLTKENIVEPMRDIRRALLEADVSLPVVRRFVQSVSEEAVGTGLIRGVKPDQQLVKTVRDELVKLMGGEVSELVFAKSKPTVILLAGLQGVGKTTVSAKLALYLKKQGKSCMLIAGDVYRPAAIDQLVILGKQVDVPVYAAGTDVKPAEIARQGLQEAKKKNVDVVIMDTAGRLQIDKTMMDELKDVKRVLNPTEVLLVVDAMTGQEAAALVTTFNLEIGITGAILTKLDGDSRGGAALSVKEVSGKPIKLVGRGERMEDLEPFYPDRMAGRILGMGDVLSFVEKAQEVMRQEDAEDLQK…	At5g03940	NP_001353332.1	21	102	21	8.306	0.0535614	5	3	8	Cp	77	1	Cp	Cp	Cp	C	99.1	plastid stroma	plastid	-
	Solyc02g087400	SRP43	Signal recognition particle 43 kDa protein	MDALFVNSSLSRLKLKFSSQFPTFSPLPHHSYLPLKKLNLPLVFATLQNQHQQQSAAEEVAQEEFEDYDADETYGEVNKIIGSRAIEGGKGMEYLIEWKDEHAPTWVPSNFIAQDVVAEYETPWWNAAKKSDESALRELIEAEDDRDVDAVDDDGRTALLFVSGLGSEPCVKLLAEAGADVNYRDRSGGLTALHMAAGYVKPGVAKLLIELGADPEVQDYRGQTPLSLARMVLNQTPKGNPMQFARRLGLENVIRVLEDAIFEYAQVEEILEKRGKGENVEYLVKWKDGEDNEWVKAWLISEDLVRDFEAGLEYAEAECILEKREGDNGKGEYLVKWTDIEEATWEPEENVDPLLIEDFEKGQQKVVS	At2g47450	XP_010316268.1	11	61	11	5.31	0.0342416	5	3	8	M	49	5	Cp	-	Cp	C	94.8	plastid stroma	plastid	-
	Solyc11g066110	ALB3	ALBino3; inner membrane protein PPF-1, chloroplastic isoform X1 (NCBI); Inner membrane protein oxaA (AHRD V1 *-*- B9L0L4_THERP); contains Interpro domain(s) IPR001708 Membrane insertion protein, OxaA/YidC	MAKTLISSPSSFIGTPLPSLSRHVFHRRRLISTRVKFSFHDLPPIHSLHSNFDFEAVVSRAEGLLYTLADAAVAADPGVAPDVTAAGTAQKSGGWFAFISDAMEVVLKVMKDGLQAVHVPYSYGFAIILLTLLVKAATFPLTKQQVESTLAMQNLQPKIKAIQQRYAGNQERIQLETSRLYKQAGVNPLAGCFPTLATIPVWIGLYQALSNVANEGLLTEGFFWIPSLGGPTTIAARQSGSGVSWLFPFVDGHPPLGWHDTVAYLILPVLLIVSQYVSMEIMKPPQTDDPSQKNTLLVFKFLPLMIGYFSLSVPSGLTIYWFTNNVLTTAQQVWLRKLGGAKPAVSGDAGGIISAGRAKRTTSQPEQSGERFRQLKEDEKKKKSTKALPTDKVELSASI…	At2g28800	XP_004250966.1	1	2	1	0.212	0.00136709	2	0	2	Cp	57	3	Cp	Cp	Cp	M	67.2	thylakoid-integral	plastid	-
	Solyc05g014050	ALB4	Albino3-like protein 1 (Alb4), chloroplastic (NCBI); Inner membrane protein oxaA (AHRD V1 *-*- B9L0L4_THERP); contains Interpro domain(s) IPR001708 Membrane insertion protein, OxaA/YidC	MATFFPSLGPNSILSPFVDRTRTLNPVFQRTHFGNLPLNKPFSRGMLGVARFGLGQDPFPDPETAELFFKDLLTRTEGFLYTVADAAVSGSVDTVVDTTGSVKQNSDWLSGITNGMETVLKVLKDGLSTLHVPYSYGFAIILLTILVKAATFPLTKKQVESSLAIRSMAPQIKAIQERYAGDQERIQLETARLYKLAGVNPLAGCLPTLATIPIWIGLYRALSNVANEGLLTEGFFWIPSLAGPTTVAARQTGSGTSWLFPFVDGHPPLGWSDTFAYLVLPVLLVVSQYISIQIMQPSQQSDDPNVKNSQAITKFLPLMLGYFSLSVPSGLSLYWLTNNILSTGQQVWLQKLGGAKVPTLKLSDDTPKKEQPQIQKLVSEATIAKKKDANPTSDKPRQG…	At1g24490	XP_010320958.1	4	19	4	1.081	0.00697085	5	0	5	Cp	44	2	Cp	Cp	Cp	M	70.3	thylakoid-integral	plastid	-
	Solyc04g025160	Get3B-like	ATPase GET3B-like (GUIDED ENTRY OF TAIL-ANCHORED PROTEINS 3B), chloroplastic	MEVVGYGHSSNSLRPSHPLSLFNFRPTFSSATFISFKKQPIKCLQVRAVASPAGFDEMVSGTERKYYMLGGKGGVGKTSCAASLAVKFANNGHPTLVVSTDPAHSLSDSFAQDLTGGTLVPVEGPYSPLFALELNPEKAKEEFRSATQISGGSGIKDFMDGMGLGVLAEQLGELKLGELLDTPPPGLDEAIAISKVMQFLESQEYNMFTRIVFDTAPTGHTLRLLSLPDFLDKSIGKLLKLRQKIASATSAIKSVFGQEGTPKPDAADKLERLRERMIKVRELFRDTTSTEFIIVTIPTVMAISESSRLCASLKVEDVPVKRLIANQILPFDQLNPISNLFFNELRSVL	At3g10350	XP_019069071.1	4	20	3	1.848	0.0119169	5	3	8	M	48	5	Cp	possibly Cp	Cp	Cp	99.3	plastid	plastid	-
	Solyc01g080840	SECA1	Protein translocase subunit secA (AHRD V1 ***- B9I9A8_POPTR); contains Interpro domain(s) IPR000185 SecA protein	MELVFSPPSVDWPATAGGRSSSLANRRSTANEKVRGLIGTRSWLRGGEESLRLLGLELKKTRRRRMMTPEASLGGLLGGIFKSSDSGESTRQMYAATVTLINGMESMVSSLSDSQLREKTAALQERARRGDSLDSLLPEAFAIVREASKRVLGLRPFDVQLIGGMVLHKGEIAEMRTGEGKTLVAILPAYLNALTGKGVHVVTVNDYLARRDCEWVGQVPRFLGLKVGLIQQNMTSEQRRENYMCDITYVTNSELGFDYLRDNLSVDELVVRNFNYCVIDEVDSILIDEARTPLIISGPAEKPSDQYYKAAKVAAAFERAIHYTVDEKQKNVLLTEQGYADAEEILDVKDLYDPRQQWASYILNAIKAKELFLKDVNYIIRGKEVLIVDEFTGRVMQGR…	At4g01800	XP_010323109.1	30	124	29	3.458	0.022299	5	3	8	Cp	15	2	Cp	-	Cp	N	77.4	thylakoid-peripheral-stromal-side plastid stroma	plastid	plastid
	Solyc01g097310	TATA	Sec-independent protein translocase protein TATA/E homolog (AHRD V1 *-*- D7DW94_NOSA0); contains Interpro domain(s) IPR006312 Twin-arginine translocation protein TATA/E	MAAIISSGAAVTTTLSLSFTPKPISSSSSSSAPKIQTLCSSSSLFFNSNSQLFLGPPTTTRKVRSNSKRGLSCYCLFGLGVPELAVIAGVAALVFGPKQLPEVGRNIGKTVKSFQQAAKEFESELKKEPDASAQPPVEKAIEVSHEEKQDTKVPSTKESS	At5g28750	XP_004230095.1	4	15	4	9	0.0580367	5	0	5	Cp	64	1	Cp	Cp	Cp	Cp	90.4	thylakoid-integral	plastid	-
	Solyc03g025310	TATB HCF106	Sec-independent protein translocase protein tatA/E homolog (AHRD V1 *-*- D4TUR0_9NOST); contains Interpro domain(s) IPR006312 Twin-arginine translocation protein TatA/E	MAQINMSRSIFFVRPIYLQDQWRRKQYECRLAEFDSMTTSSLMASALSSSSSSLASSRRVSVTALSFSSISVTHNPKVHFFKWIPYSGLSSWNGLKQLSISKSQFSVKIGRSRKNKGKGVYASLFGVGAPEALVignaVVALLVFGPKGLAEVARNLGKTLREFQPTIRELQDVSREFKSTLEREIGLDDIKGSVQDTRNSSTMSPSSDSSYKNSVADPNGSPSPKLASTAEDDLERMMRIADAEKQAEKDLAALLESRSESQTVSQEVADNSSSSDRAYSTEEYLkinaseEQLKAAAQKQSETSTPEQIPFNTQSLSQDSASSADGAYSTEDLSKAAAQQNLSSSQQSPSNAESQSQEAPGEAASMISSSTNPESET	At5g52440	XP_004234427.1	5	29	5	1.154	0.00744159	5	3	8	M	59	5	Cp	-	Cp	C	75.9	thylakoid-integral	plastid	plastid
	Solyc09g009290	STT1	Sorting of cpTAT substrates to thylakoid membranes; Ankyrin repeat protein (AHRD V1 **-- B4F7X1_MAIZE); contains Interpro domain(s) IPR002110 Ankyrin	MEKIMVLQCNSSSLFTQLWPMTVTATAYTCRFSCSNVVSHRFTRRINMGFRSFQEISTRNSVVNLRKAHFWEDPDDGSDSEEEEEEEEEREEDMDVESSFEYEENRAMDNSTNGLSNREDEFVKEVEQLLSPEEREILYHNQTPELDKISTEKWNPLHTFALAGQIRFMDRLLEEGLDIDAVDKEGQTALHHAVFGKKEAVISHLLRKGANPQVRDTDGVTPLHYAVQVGALQTVKMLIKYKVDVNAADNVGWTPLHVAMQSRNRDIAKVLLVNGADKYRKNKDGKTPLDISLCYGKDFKSYDLAKLLKLVNANREL	At5g40160	XP_004246551.1	1	2	1	0.145	0.000935035	2	0	2	Cp	33	4	Cp	Cp	Cp	C	90.2	plastid stroma	plastid	-
	Solyc09g031780	TIC110	Translocon at the inner envelope membrane of chloroplasts 110, chloroplastic isoform X2	MNPSSLLLPINQPPPVNTFRSQFLNPTPLRLTPKFYLKRRIQSTVISSSSASLQHKPTSVNPDVFGGKKELSPIQSLVDAMSPPIRIASSALIFAAAIAAGYGLGLRFGGSRNAGLGGAIAFGAAGAGAAYALNSCAPQVAAINLHNYVADFDNPAALNKEDIESIANKYGVSKQNEAFNAELRDIYCRYISAVLPASTEELRGDEVDTIIKFKNALGIDDPDAADMHMEIGRRIFRQRLETGDRDGDMEQRRAFQKLIYVSTLVFGESSAFLLPWKRVFKVTDAQVDVAVRDNAQRLYASKLKSVGRDIDVNQLISLREAQLAYRLSDELAHEMLKEHARKLVEEIISTAVGILKSRTRATEPTRVIEELDKVLSYNNLLISLKNHADASRFAPGIGP…	At1g06950	XP_004246966.1	5	11	5	0.259	0.00167017	5	3	8	Cp	94	3	Cp	possibly Cp	Cp	Cp	92.8	envelope-inner-integral	plastid	plastid
	Solyc03g025410	TIC32	Translocon at the inner envelope membrane of chloroplasts 32	MWLFKRKGPSGFSSSSTAEEVTHGIDGSGLTAIVTGASSGIGSETSRVLALRGVHVIMAVRNMTSGKDVRDAIVTEIPAAKVDTMELDLSSLASVKKFASDFKSSGRPLNLLINNAGIMATPFMLSKDNIELQFATNHVGHFLLTNLLLEKMKETARKTKREGRIVNVSSEAHRFAYREGIRFDKINDPKSYNSYGAYGQSKLANILHANELTRRLKEDGVEISANSLHPGTITTNLFRHMGIFDGLVGTLGKLLLKNVQQGASTTCYLALNPQVKGVSGEYFSDNNLAKTTALAKDMDLAKRLWDFSMDLIK	At4g23430	XP_004234415.1	5	18	5	1.894	0.0122135	5	3	8	-	-	4	-	-	Cp	Cp	98.9	-	plastid,cytosol	plastid
	Solyc08g081200	TIC32	short-chain dehydrogenase TIC 32	MWLFGLKGASGFSASSTAEEVTQGIDANGLTAIVTGASSGIGAETTRVLAMRGAHVVMAVRNVKSGEEVKDSILKEIPHAKIDVMEMDLGSMESVRKFASEYNSTGYPLNILINNAGVMAPPFMLSQDNIELQFATNHLGHFLLTNLLLQNLKNTAQASHKEGRIVNVSSLGHRFTYREGIRFDKINDKDSYTAILAYGQSKLANILHANELARHFKEEGAEITANSLHPGSITTNLLRHQSLVEGLVNWIGKYFIKNIPQGAATTCYVALHPQVKGITGEYFSDSNISASTSQGTDAELAKKLWDFSLNLTKPQ	AT4G23420	XP_004245595.1	2	2	2	0.52	0.00335323	1	2	3	-	-	4	-	-	Cp	C	61.2	-	peroxisome	-
	Solyc11g020300	TIC40	Translocon Tic40 (AHRD V1 ***- Q9SC41_PEA); contains Interpro domain(s) IPR006636 Heat shock chaperonin-binding	MENIGIVSSPKMVLGLSSNSVISSKPFFGLPHLPKRPFKNGRTVRPTTCFEVVSCFQGPRLTKKIVLGKSGRGSFASTTTSGGKQTSSVGVNPQFSAPSPPSQMGSPLFWIGVGVGFSALFAWVASYLKKYAMQQALKTMMGQMNGQNSQFSNTAFSPGPGSPFPFPFPPPPVSGPASSSPPPPTASSSSTPSASFASQPVTVDVSATKVEEPPTVNVKNDKEAEKEPKKNAFVDISPDETFQKGAFENFKDSAETAAVTVDQVTQNGAASQSGFGSNTSDSTSSTGKSNPLLSVDALEKMMEDPTVQKMVYPYLPEEMRNPTTFKWMLQNPQYRQQLQDMMNNMGGNPEWDNRMMDSLKNFDLSSPEIKQQFDQIGLTPEEVISKIMANPDVAMAFQN…	At5g16620	XP_004250413.1	3	11	3	0.896	0.00577787	5	0	5	Cp	48	2	Cp	Cp	Cp	Cp	60.8	envelope-inner-integral	plastid	-
	Solyc12g009980	STIC2	Suppressor of Tic40-2	MASTSAFTAGISNLHSFKKPCPNANQVGMWTLSRPGCRKVLDNPRPLQICSLFGGKKDNNEQNNDAPSKAGLFGNMQNLYETVKKAQNVVQVEAVRVQKELALAEFDGYCEGELIKVTLSGNQQPIRTEITEAAMALGPEKLSLLITEAYKDAHQKSVLAMKERMSDLAQSLGMPAGLGEGFKQ	At2g24020	XP_010313819.1	8	57	8	9	0.0580367	5	3	8	Cp	23	2	Cp	Cp	Cp	Cp	63.4	plastid stroma	plastid	plastid
	Solyc08g006780	STIC2-like	Suppressor of Tic40-2	MAISPSATLTSQFLNYQRPNNADHKCPSSSSLPFSKSNSSTLLIGPSSVSLRNGQKSRRSLHVHGLFGGKKDNNSDDNSSKAGVLGNMQNLYETVKKAQMVVQVEAVRVQKELAAAEFDGYCEGELIKATLSGNQQPVRIEITDAAMDMGSDKLSLLVTEAYKDAHQKSVLAMKERMSNLAQSLGMPAGLEGMK	At4g30620	XP_004244523.1	9	66	9	30.623	0.197473	5	3	8	Cp	48	1	Cp	Cp	Cp	Cp	98.7	stroma	plastid	plastid
	Solyc12g096550	TIC55	TIC 55, chloroplastic	MALQQPFLSELLLHSSSIRTTLPKSSLFSLQIPQRFNLYLQNKQIKKQGTSCYAIAENLEAEDQSLILENSSLDELRGQREIVGYDWTEEWYPLYLTKNVPNDAPLGLTVFDKQVVLYKDGSGELRCFEDRCPHRLAKLSEGQLYDGKLECLYHGWQFDGDGKCVKIPQLPENAKIPRSACTKTYEIRDSQGVVWIWMSHGTPPNINKIPWFENFERKGFRDISTIHELPYNADHSILLENLMDPAHVPISHDRTDFTAKREDAGPLFFEVTERTNRGFAGWWGKERDQGKANYTPNFLRFESPCVLQNNREIVDESGEKHYFSGLFLCRPSGQGKSMLIVRFGNTRKRTGILKFIPNWFLHQNASKVFEQDMGFLSSQNEILMKEKVPTKKLYLNLKS…	At2g24820	XP_004253047.1	1	1	1	0.096	0.000619058	1	0	1	Cp	51	4	-	-	Cp	Cp	67.1	envelope-inner-integral	plastid	plastid
	Solyc10g051110	TIC62	TIC 62, chloroplastic isoform X1 (NCBI)	MELRCLQTLNIPATALAEKPFLCGHPITLIQTSTKRGPNSKNLKTLRFRTQISAKISSLEPQGTAKDVKSKDANLVFVAGATGRVGSRTVRELLKLGFKVRAGVRSAQRAQPLVKSVEQIKLENATDGGAKAIEKLEIVECDLEKSYQIRPALGDASIVICCIGASEKEIFDVTGPYRIDYLATKNLIDAATVAKVNADHFILLTSLGTNKVGFPAAILNLFWGVLLWKRKAEEALLASGLPYTIVRPGGMERPTDSFKETHNITLSEEDTLFGGLVSNLQVAELMAVMAKNRSLSYCKVVEVVAETTAPLTPMEDLLAKIPPQRVEVSPPKETGDLQKSATPTSITSEIPDALLEKKPSETKLKAAAPLSPYTAYAELKPPTSPSPIPPGGHQAGASG…	At3g18890	XP_025883486.1	13	75	13	6.667	0.0429923	5	3	8	-	-	4	-	possibly Cp	Cp	C	96.6	envelope-inner-peripheral-stromal-side thylakoid	plastid	-
	Solyc09g074940	TOC159	Translocase of chloroplast 159, chloroplastic	MDSEEATFSPPAVSSSPGSSPINNSSSNHTETENVSKINVEINDSDINSNSNSEGKSASDVTIVGGQQELPIPADPDEGTLEKTIGEEKLDDSVVGSAEIEKPVSEVSMSEGVENVEALGGDVGGSVPVignaNSLPDSTDSDATKSLGTGIEGSEGNTEEFDSVDKLNSIEQVKDNGGEVAVGAGLKEGEDRSTQEEVKETVEDEKMEPKEGGDRSIEEEVKETVEDEKIELQGGEDRSIQEEVKEIVEDEKNEALTSVASSNLKEAEEPTSVIEESAIASSNLKESEEPTSVFEEVAIASSNLKEAEEPTSVIEERAIHSDDAEKLNKVVVEQPSESLLAETGSKKFTSEGDAVVDAIEVNVSGPGVAVVGDVDESKEVEEHIEGTHDENVTSVNDV…	At4g02510	XP_010326580.1	5	14	5	0.238	0.00153475	5	2	7	Cp	48	3	Cp	-	Cp	C	99.4	envelope-outer	plastid	plastid
	Solyc02g091530	PTST	PTST; 5'-AMP-activated protein kinase subunit beta-1 (Fragment)	MNISILLRQSEIWKSVVIYERYKSDRIVIEKNILFMNLISAIAAELGIDESKKDIEIRYVVEGVALPCNCCFEFHQLGRNSLIMDCNLLNSLGQTCFPRFKVENIDGVRGNMTSYKSRIGFCRMHTLFSVPNWKLSIPCTSWKIFCAPENSLVVSEKIEDAGLSDPEQVPEQPLRTEELKLLLADAERSKLLKKLSEANRYNRLLKRELQAKEDAMVNFKSELSVTELEIQALARLAEEIAKSAIPAGSRKIKGRYIQSHLFSRLEAISEKLKEQIKGVEAVQAKEVPLSWVGVAESVQVMGSFDGWSQGEHLSPEYTGSYMNFSATLFLRPGRYEIKFLVDDEWKLSPELPTTGEGLTKNNLLVVE	At5g39790	XP_025885479.1	6	17	6	1.404	0.00905372	5	3	8	-	-	4	-	-	Cp	C	99.82	plastid	-	-
	Solyc01g010460	PTST2	Protein targeting to starch (PTST) homolog 2	MVSLILTPTHLSFSPIPTPIVINSPKRLHCRRKAAIFNLVLGKNMGSFQVFKKLSKKRVGDSSYCLCRKGLGSEGDMELEEEILAFMEISENPNVFPTRKELEKAGRVDLVEAIKKRGGWFSFGWDSEDDDTNTVNVNVNEVESVEMNFDIEEFHERVKRCQESDLLHENEAHFSGSGDSSSSQPASSSGRSIETVAEENSGIEGILSRLEKERNSSLGIDLGKPGHTSHTSSRDNIDDRSFGTSDADRTDLRKNESLSKGSSMKDIQSDEEIYRSVSPARLRKWSIQRAGLQDIDFEAAEVALGKSWIGSTSEASGDDVVNITASRFEALQRSKNGNNNEMSTRLKHLELELSMTLRSLKSKSEEFSSKEVLICVFCFS	At1g27070	XP_019069687.1	1	1	1	0.155	0.00099952	1	0	1	Cp	29	2	Cp	possibly Cp	Cp	G	27.2	plastid	-	-
	Solyc09g008260	PTST3	Protein targeting to starch 3 , PTST3	MASLFHFPTSHKLFLPSQTLSPSICIRHNHHFFLICRSKSKIYASIKKSRASRKVKSNDDLCNDIREFLSSVGLPENADHVPTMKELSQNGRQDLANIVRRRGYKFVKELLLTSKQPAYECIGEDGLVEKSEDGSLDGKIADMAHDVSLPSEASAVDSYTNDASNDLILNSDEQNSGDQEFLGYSFLEEKVVNFIQNGELDSIEGSGFEIFQREGSIEGQNGAKILSGSPIAQSIQHDEHPSMQSSLMRNDSLSAEYLTMTEGISSADTEPHNMEIQAEINHLKFVLHQKELELTQLKQQIEEEKRLLSVLQIKAETEIREAERLISEKDAELNAAEDSLSGLKEVEIQYRAEGENVEVAGSFNGWHHKIKMDPQESPDPIGEDIQSSSDIVDPIGDDI…	At5g03420	XP_004246622.1	4	19	4	0.468	0.00301791	5	2	7	Cp	43	3	Cp	Cp	Cp	N	86.7	plastid	-	-
Chaperones	Solyc03g117590	TOC12 DJA8	Chaperone protein DnaJ (AHRD V1 *-*- C5UZI2_CLOBO); contains Interpro domain(s) IPR001623 Heat shock protein DnaJ, N-terminal	MATMGMTGSIGGYGAASASLFRLRNSAKKKTRNGKNGFRVSCVCSSSAVADPYKTLKIQPGASESEVRKAFRQLALKYHPDVCRGNNCGVQFHQINEAYDVVMSNLRGETRAELEMIEEYDDSNDESMRGMHEPDWDLWEEWMGWEGAGIRDYTSHVNPYI	At1g80920	NP_001233835.1	1	3	1	0.778	0.00501695	3	0	3	Cp	45	2	Cp	Cp	Cp	C	90.7	stroma	-	-
	Solyc06g068500	TOC12 DJA8	Chaperone protein DnaJ 1 (AHRD V1 *-*- D8USE3_9MICC); contains Interpro domain(s) IPR001623 Heat shock protein DnaJ, N-terminal	MATAMGMMRNVGGYGSASASWIRLKNRANKKTKRSENVKFGVTCVYSPSLSDPYKTLRIQPDASESDVRKAFRQLALQYHPDVCRGSNCGIQFHQINDAYDTVMSNLRGETKNAEMEIYEEYDDDDEAMRGVNDPDYDMWEEWMGWEGAGIRDYSSHINPYI	At1g80920	XP_004241676.1	1	1	1	0.468	0.00301791	1	0	1	M	109	5	Cp	Cp	Cp	C	50.6	stroma	-	-
	Solyc01g103450	HSC70-1	Chaperone DnaK (AHRD V1 ***- Q1SKX2_MEDTR); contains Interpro domain(s) IPR012725 Chaperone DnaK	MASSTAQIHALGATYFANSSSSTRKPLKSVFLGQKLNNRTLAFGLKQKKSRGNNGGYAPMRVVAEKVVGIDLGTTNSAVAAMEGGKPTIVTNAEGQRTTPSVVAYTKSGDRLVGQIAKRQAVVNPENTFFSVKRFIGRKMNEVDEESKQVSYNVIRDENGNVKLDCPAIGKSFAAEEISAQVLRKLVDDASKFLNDKVSKAVVTVPAYFNDSQRTATKDAGRIAGLEVLRIINEPTAASLAYGFEKKSNETILVFDLGGGTFDVSVLEVGDGVFEVLSTSGDTHLGGDDFDKRIVDWLAASFKRDEGIDLLKDKQALQRLTETAEKAKMELSSLTQTNISLPFITATADGPKHIETTITRGKFEELCSDLLDRLKTPVQNSLRDAKLSFSDIDEVILVG…	At5g49910	XP_004230445.1	41	493	31	58.078	0.374517	5	3	8	Cp	63	1	Cp	Cp	Cp	Cp	60	plastid stroma	plastid	plastid
	Solyc01g103450	HSC70-2	Chaperone DnaK (AHRD V1 ***- Q1SKX2_MEDTR); contains Interpro domain(s) IPR012725 Chaperone DnaK	MASSTAQIHALGATYFANSSSSTRKPLKSVFLGQKLNNRTLAFGLKQKKSRGNNGGYAPMRVVAEKVVGIDLGTTNSAVAAMEGGKPTIVTNAEGQRTTPSVVAYTKSGDRLVGQIAKRQAVVNPENTFFSVKRFIGRKMNEVDEESKQVSYNVIRDENGNVKLDCPAIGKSFAAEEISAQVLRKLVDDASKFLNDKVSKAVVTVPAYFNDSQRTATKDAGRIAGLEVLRIINEPTAASLAYGFEKKSNETILVFDLGGGTFDVSVLEVGDGVFEVLSTSGDTHLGGDDFDKRIVDWLAASFKRDEGIDLLKDKQALQRLTETAEKAKMELSSLTQTNISLPFITATADGPKHIETTITRGKFEELCSDLLDRLKTPVQNSLRDAKLSFSDIDEVILVG…	At5g49910	XP_004230445.1	41	493	31	58.078	0.374517	5	3	8	Cp	63	1	Cp	Cp	Cp	Cp	60	plastid stroma	plastid	plastid
	Solyc11g020040	HSC70-2	Chaperone DnaK (AHRD V1 ***- Q1SKX2_MEDTR); contains Interpro domain(s) IPR012725 Chaperone DnaK	MASSATHQVKIPFSGHKLDNRTPFSGGRISFASRKKCYSDKAVRQRFRPMKVVNEKVVGIDLGTTNSAVAVMEGGKPTIVTNAEGQRTTPSVVAYTKNGDRLVGQIAKRQSVVNPENTFFSVKRFIGRKMAEVDEESKQVSYRVMKDENGNVKLECPAIGKQFAPEEISAQVLRKLVDDASKFLNDKVAKAVVTVPAYFNDSQRTATKDAGRIAGLDVLRIINEPTAASLAYGFEKKSNETILVFDLGGGTFDVSVLEVGDGVFEVLSTSGDTHLGGDDFDKRIVDWLADTFRKEEGIELLKDKQALQRLTEAAEKAKIELSTLTQTNISLPFITATADGPKHIDTTFTRAKFEELCSDLLDRLKTPVETALKDASLSFKDIDEVVLVGGSTRIPAVQN…	At5g49910	NP_001233780.2	13	97	3	1.865	0.0120265	3	1	4	Cp	69	3	Cp	Cp	Cp	C	80.5	plastid stroma	plastid	plastid
	Solyc05g010670	Hsp90-5	Chaperone protein htpG (AHRD V1 ***- HTPG_MYXXD); contains Interpro domain(s) IPR001404 Heat shock protein Hsp90	MAPVVSRSLTSSPMASVPYSPSFVLGSGSTNRVCLKTTFLPRNNIKNGFLQSGLRWKQDKRDVGVVVRCEASAVAEKEASETSGETHEYQAEVSRLMDLIVHSLYSHKEVFLRELVSNASDALDKLRFLSLTEPSLLGDSSELEIRIKPDPDNGTVTITDTGIGMTKEELIDCLGTIAQSGTSKFLKALKENKDLGADNGLIGQFGVGFYSAFLVAQKVVVSTKSPRSDKQFVWEAEADSSSYVIREETNPENLLTRGTQITLYLRDDDKYEYCEPKKIQDLVKNYSQFVSFPIYTWQEKSRTIEVEEEEEPKEGEEKTEEEKKMTKKTKTEKYFDWELTNETKPIWMRNPKEVEKEQYQEFYKRTFNEFLDPLAHTHFTTEGEVEFRSVLYIPGMAPL…	At2g04030	XP_004239010.1	23	166	23	10.325	0.066581	5	3	8	Cp	51	2	Cp	Cp	Cp	C	68	plastid stroma	plastid	plastid
	Solyc06g076020	HSC70-1	heat shock protein IPR013126 Heat shock protein 70	MAGKGEGPAIGIDLGTTYSCVGVWQHDRVEIIANDQGNRTTPSYVGFTDTERLIGDAAKNQVAMNPINTVFDAKRLIGRRFSDASVQEDMKLWPFKVIPGPGDKPMIVVTYKGEEKEFAAEEISSMVLTKMKEIAEAFLGSTVKVVTVPAYFNDSQRQATKDAGVISGLNVMRIINEPTAAAIAYGLDKKATSAGEKNVLIFDLGGGTFDVSLLTIEEGIFEVKATAGDTHLGGEDFDNRMVNHFVQEFKRKHKKDITGNPRALRRLRTACERAKRTLSSTAQTTIEIDSLYEGVDFYSTITRARFEELNMDLFRKCMEPVEKCLRDAKMDKSTVHDVVLVGGSTRIPKVQQLLQDFFNGKELCKSINPDEAVAYGAAVQAAILSGEGNEKVQDLLLLD…	At5g02500	NP_001234491.2	9	44	1	1.913	0.012336	1	0	1	-	-	2	-	-	Cp	C	94.62	-	cytosol	-
	Solyc07g064950	TIG-like	Trigger factor-like protein (AHRD V1 ***- Q9FLP1_ARATH); contains Interpro domain(s) IPR005215 Trigger factor	MATPISIQLNPSILSFPSNSTKAQFFQLNDKFLLKPNLSSRQFSSSLVASARLVAAAAAAASGVVETVEDKLPADLHVTETQEPNSRIRLTVEVPTVVCEDCYKQVIKEFMrRNASKVPGFRPGKNVPEDILVGFVGKQNIQNAVVEAILKRTLPHAMSSVTRNAYEDSIRIVTKFEDMEKTYLSLNCLRYDVVVDVAPEIKWKPDDAYKNIKVAVELDSDMDAQRASEKELIrRNAHKSLGALKIVTDRGLQVGDVAVIDISATTIEQDGSDAKTIPAAESKGFNFDTEEGDNVLPGFRDSIIGIKRGETKSFPLVFPDSWKQEDLRGVHAQFTVACKELFYRDLPELNDAMAERLLPGCSSIEEVKQALLQRCLEVEQAAKDQATDNAILDQLYKMV…	At5g55220	NP_001352886.1	25	166	25	9	0.0580367	5	3	8	Cp	55	2	Cp	Cp	Cp	Cp	88.6	plastid stroma	plastid	plastid
	Solyc06g074890	TIG-like	Trigger factor-like (AHRD V1 *-*- B4W095_9CYAN); contains Interpro domain(s) IPR008881 Trigger factor, ribosome-binding, bacterial	MAMTMTTAMASPSRRLLINSRHSTICTIPKNVAIYPAAAVTNQGLLKHCISSQRCLRSLVKPVSAASSGFEADLGDDESLIRVKNAKIAVESEDDEKIQVRVDVSEEDTKTVFEKVLTNLAKSAPPVPGFRREKGGKTSKVPKDFLLQILGEDRVTNFVIREIVTSTLADYVKKENLAVKDNKISTTQTADELKSSFVPGTEFRFNATLELEKSKTEAST	At2g30695	XP_004241291.1	10	79	9	3.87	0.0249558	5	3	8	Cp	63	3	Cp	Cp	Cp	Cp	64.9	plastid stroma	plastid	-
	Solyc06g074900	TIG-like	Trigger factor-like (AHRD V1 *-*- B7KBH9_CYAP7); contains Interpro domain(s) IPR008881 Trigger factor, ribosome-binding, bacterial	MTMTMTTAMASPSRRLLIDSCYCIVSTIPKNVAIYPATAVTKKGLLKHCISLQGRLRSLVKPVSAASSGLEADSADECLKNAKIVVESEEAEKIQVRVDVNGEYTKMVFDSVLTKLAKSEQPIPGFRREKGGKTSQVPREFLPQILGEERVTNSVIREIINSTLAEYVKKENLAVKDNKISITQTADELMSSFAPGMEFGFNAILWLEKSKTEATT	At2g30695	XP_019070028.1	5	16	4	1.894	0.0122135	5	3	8	-	-	3	-	possibly Cp	Cp	Cp	55.4	plastid stroma	plastid	-
A Proteins were identified by acetone preparations and/or the gel method. For emPAI and Mol% calculations, only the data from the acetone prepartions were used. Proteins identified solely by the gel method have data for the number of peptides, PSMs and unique peptides.
B Names of tomato proteins were based on the literature, NCBI annotation (identified in BlastP searches), and/or SolyGenomics descriptor. In a small number of cases, tomato protein names were assigned based on NCBI annotations and the Arabidopsis homolog.
C Some Sol Genomics descriptors were updated when NCBI annotations and Arabidopsis gene annotations were aligned.
D Target P's subcellular locations are: chloroplast (Cp), mitochondria (M), secretory (S), and no predicted location is indicated by a dash (-).
E ChloroP was used to predict the presence of a chloroplast transit peptide (Y) and the lack of a predicted transit peptide is indicated with a dash (-).
F Predotar's predicted subcellular locations were: chloroplast/plastid (Cp),endoplasmic reticulum (ER) or mitochondrion (M). For proteins with localization predictions that were less clear, Predotar provided categorized of possibly Cp, M and ER. Proteins with unresolved locations or that did not have a homolog detected by Predotar are indicated with a dash (-).
G WoLF PSORT's and YLoc's predicted subcellular locations were: chloroplast/plastid (Cp), cytosol (C), cytoskeleton (Cy), endoplasmic reticulum (ER), extracellular (EX), golgi apparatus (G), mitochondrion (M), nucleus (N), peroxisomes (P), plasma membrance (PM), and vacuole (V). Proteins with no chloroplast location in WoLF PSORT are indicated by not Cp.The number of proteins predicted to be in t…

## Sheet: Table S10C-folding
Table S10C. Protein folding
Gene and protein descriptors							ProteomicsA								Bin codes		Algorithms								Databases
Category	Tomato Gene ID	Gene nameB	DescriptionC	Protein Sequence	Arabidopis homolog	Tomato proteinB NCBI accession	Peptides	PSMs	Unique Peptides	emPAI	Mol%	Acetone samples	Gel samples	Total	Bincode	Name	TargetP D ver.1	Transit peptide length	TargetP (reliability class)	ChloroP E	Predotar F	WoLF PSORT G	YLoc G	YLoc % Confidence	PPDB	SUBA4	plprot
ATP-dependent Clp Chaperones	Solyc02g088610	CLPB3	ATP-dependent chaperone ClpB (AHRD V1 **** B5W0X8_SPIMA); contains Interpro domain(s) IPR017730 Chaperonin ClpB	MSTVTSFSGVQFCVPSSSSNSSNRVALFSSHSAPYLNFSGKSRVLGKCSSLKLKRKDVFFSRKTEKLSQGSRLTVRCDASNGRITQQDFTEMAWQAIVASPEIAKENKHQIVEtheLMKALLEQKNGLARRIFSKTGVDNTRLLEATDKFIRQQPKVignaETAGSMLGRELEGLMQRAREYKKEYGDSFVSVEHLVLGFIQDKRFGKQLFNDFQISLKTLKTAIESIRGRQNVIDQDPEGKYESLEKYGKDLTAMARAGKLDPVignaRDDEIRRCIQILSRRTKNNPVLIGEPGVGKTAISEGLAQRIVQGDVPQALMNRRLISLDMGALIAGAKYRGEFEDRLKAVLKEVTESEGQIILFIDEIHTVVGAGATNGAMDAGNLLKPMLGRGELRCIG…	At5g15450	NP_001234143.2	45	214	43	17.166	0.110695	5	3	8	20.2.1	stress.abiotic.heat	Cp	76	1	Cp	Cp	Cp	Cp	97.9	plastid stroma	plastid	plastid
	Solyc03g118340	CLPC2	ATP-dependent clp protease ATP-binding subunit (AHRD V1 **-* Q85G08_CYAME); contains Interpro domain(s) IPR013093 ATPase associated with various cellular activities, AAA-2	MMARALVQSTNILPSVAGERAGQFNGSRKDQRTVRMLCNVKCCSSRLNNFAGLRGCNALDTLLVKSGETLHSKVAAATFVRRPRGCRFVPKAMFERFTEKAIKVIMLAQEEARRLGHNFVGTEQILLGLIGEGTGIAAKVLKSMGINLKDARVEVEKIIGRGSGFIAVEIPFTPRAKRVLELSLEEARQLGHNYIGSEHLLLGLLREGEGVAARVLENLGADPTNIRTQVIRMVGESSEAVGASVGGGTSGLKMPTLEEYGTNLTKLAEEGKLDPVVGRQAQIERVTQILGRRTKNNPCLIGEPGVGKTAIAEGLAQRIANGDVPETIEGKKVITLDMGLLVAGTKYRGEFEERLKKLMEEIKQSDEIILFIDEVHTLIGAGAAEGAIDAANILKPALA…	At5g50920	NP_001316890.1 D'Andrea et al (2018)	42	422	10	23.484	0.151437	5	3	8	29.5.5	protein.degradation.serine protease	Cp	43	4	Cp	possibly Cp	Cp	C	69.2	plastid stroma envelope-inner-peripheral-stromal-side	plastid	plastid
	Solyc12g042060	CLPC1	ATP-dependent clp protease ATP-binding subunit (AHRD V1 **-- Q85G08_CYAME); contains Interpro domain(s) IPR013093 ATPase associated with various cellular activities, AAA-2	MARALVQSTSIPSSVAGERTTKFNGSGKTKRAVTMLCNAQSSSLTLRDFTGLRGCNAIDTLVRSGQTLQSKVAAATYVRRPRGCRFVPKAMFERFTEKAIKVIMLAQEEARRLGHNFVGTEQILLGLIGEGTGIAAKVLKSMGINLKDARVEVEKIIGRGSGFVAVEIPFTPRAKRVLELSLEEARQLGHNYIGSEHLLLGLLREGEGVAARVLENLGADPSNIRTQVIRMVGESNEAVGASVGGGTSGQKMPTLEEYGTNLTKLAEEGKLDPVVGRQPQIERVTQILGRRTKNNPCLIGEPGVGKTAIAEGLAQRIANGDVPETIEGKKVITLDMGLLVAGTKYRGEFEERLKKLMEEIKQSDEIILFIDEVHTLIGAGAAEGAIDAANILKPALARG…	At5g50920	NP_001332862.1 D'Andrea et al (2018)	51	631	19	63.223	0.407695	5	3	8	29.5.5	protein.degradation.serine protease	Cp	36	3	Cp	Cp	Cp	C	74.2	plastid stroma envelope-inner-peripheral-stromal-side	plastid	plastid
	Solyc03g117950	CLPD ERD1	Chaperone protein ClpB 1 (AHRD V1 **-- D0CK17_9SYNE); contains Interpro domain(s) IPR013093 ATPase associated with various cellular activities, AAA-2	MELSCSSPLSVNSTISFNRYVSVYPHRRCQSVLSLFPYYPSSSSHVATTATASAPCSTSSSSSTLFGISLSHRPSSSVHRKIKRSMYIVSGVFERFTERSIKAVMFSQKEAKALGKDMVSTQHLLLGLIAEDRSPGGFLGSRITIDKAREAVRSIWLGDSEDDTTKLGSQDSSSATSATDVAFSSSTKRVFEAAVEYSRTMGYNYIAPEHIAIGLFTVDDGSAGRVLKRLGANVNRLAAEAVSRLQGELAKDGRDPISFKRSREKSFPGKITIDRSAEKAKEKNALEQFCVDLTARASEGLIDPVignaRETEVQRMIEILCRRTKNNPILLGQAGVGKTAIAEGLAINIAEGNIPAFLMKKRVMSLDIGLLISGAKERGELEARVTTLIKEVKESGHI…	At5g51070	XP_010318683.1	17	63	17	3.184	0.0205321	5	3	8	29.5.5	protein.degradation.serine protease	Cp	69	2	Cp	Cp	Cp	N	76.1	plastid stroma	plastid	plastid
Chaperone & Chaperonins	Solyc12g009440	BSD2	Bundle-sheath defective protein 2 family (AHRD V1 ***- D7LRE2_ARALY); contains Interpro domain(s) IPR001305 Heat shock protein dnaj, cysteine-rich region	MANSLCFTPIASLNSFNKPGLINRNGNCAGRKIQLIKDVTFNSKSNLRVVEVKAADSDKETKVKSIVCQKCDGNGAVACSQCKGAGVNSVNADHFNGRFKAGGLCWLCRGKKDILCGDCNGAGFLGGFMSTFDE	At3g47650	XP_004251716.1	1	3	1	0.931	0.00600357	2	0	2	33.99	development.unspecified	Cp	48	2	Cp	Cp	Cp	C	52.9	plastid stroma	plastid	plastid
	Solyc10g081240	CGE	Chloroplast grpE, Protein grpE (AHRD V1 *-*- B0CAY8_ACAM1); contains Interpro domain(s) IPR000740 GrpE nucleotide exchange factor	MFENLLKEPKTLPAYLLYLLPPFPLYHTMATTNLTTPATTLRSPSTTVSATAYSSVKPNCITFLSYSRCGRRQTPLLPRRCRIHHSANSIVPLQHRSVEKFVIFASNEDVAEAAETETETEQVEESEQEGSLDGAASEEASDEDDNAAAEETLSVVAASLQLYRDALATNDDSKVAEIEISLKSIEDEKIELQTKVASLTKELSSERDRVLRISADFDNFRKRTDRERASLVTNAQGEVVEKLLSVMDNFERAKTQIKVATEGEEKINNSYQSISKQFMEILGSLGVEPVETVGKPFDPLLHEAIMREDSSEFKEGVVIEEYRKGFRLGDRLLRPSMVKVSAGPGPAKPETTEPKEKEQIETDEKTAETPGDEGTGEGGN	At5g17710	XP_004249350.1	17	153	17	11.589	0.0747319	5	3	8	29.6	protein.folding	-	-	4	Cp	ER	Cp	V	44.4	plastid stroma	plastid	plastid
	Solyc04g009940	CJD1	Chloroplast DNA J-domain 1, CJD1 (At1g08640); Heat shock protein binding protein (AHRD V1 **-- D7KIU0_ARALY) Thylakoid memberane	MVFTISSNPVQFTHTTSLNARPNCYLKASVPVSNLSFSFFRHEYIRFSVKSRLNKRMVCAAASAAGSSSSSDDSNPYEVLGVNPIEGFDMVKAAYARRRKDAERRGDEATLAQLEKAYDKIMMSQLTKRKQGVTFGSFKVSKEVRYADKQPILPWGPRFTKSDDKDIKINLAISAVFIAWVFINRNAEWKPLQFLAFAFVYRIFEKLKAFEPPTPTFTEEGEDEGRMMRMGKRLLRSLALVFGCIAIASLGYTGLLNLIEYAGGFIPVFLYNNQELLVTGFTAIVLSIIASYYR	At1g08640	XP_004236791.1	1	3	1	0.468	0.00301791	3	0	3	35.2	not assigned.unknown	Cp	59	2	Cp	Cp	Cp	Cp	98.7	envelope-inner-integral	plastid	plastid
	Solyc01g088610	CPN10 GroES	Chaperonin CPN 10 - GroES (AHRD V1 ***- B5IMI3_9CHRO); contains Interpro domain(s) IPR001476 Chaperonin CPN10	MASTFLTLAKPFTSHSTNLPSFSPQRPIGLrRNANSLRINAISQKWEPTKVVPQADRVLIRLEELPEKSAGGVLLPKSAVKFERYLMGEVLSVGSDVAQVETGKKVLFSDINAYEVDLGTDARHCFCKESELLALVE	At3g60210	XP_004229710.1	4	37	4	5.813	0.0374852	5	3	8	29.6	protein.folding	Cp	59	1	Cp	Cp	Cp	Cp	100	plastid stroma	-	-
	Solyc12g009250	CPN20	Chaperonin (AHRD V1 *-*- D1U6H2_9DELT); contains Interpro domain(s) IPR001476 Chaperonin Cpn10	MDSSLRLQQLYPPSYYTSLKPLGDRVLVKIKTAEEKSVGGILLPVSAQSKPQGGEVVAVGEGHSIGKTTVEISIKNGTHVVYSKYAGTELEFDGSKHLILKEDDIVGILETDDIKDLQPLNDRVLIKVAEVEEKTSGGLFLSQAAKEKPSFGAVIAVGPGPLDEEGKRKALSVSPGNTVLYSKYAGNDFKGADGSEYITLRASDVIAVLQ	At5g20720	XP_004251703.1	9	119	9	9	0.0580367	5	3	8	29.6	protein.folding	-	-	5	-	-	Cp	Cp	77	plastid stroma	plastid	plastid
	Solyc07g042250	CPN21	Chaperonin 21(AHRD V1 *-*- B4WMS9_9SYNE); contains Interpro domain(s) IPR017416 Chaperonin 21, chloroplast IPR018369 Chaperonin Cpn10, conserved site	MASTQLTASSISGNGFASFEGLRSTCIVKTVSFAPLKHNNSRSFSRLVVKAATTVAPKYTTLKPLGDRVLVKIKTAEEKTVGGILLPVSVQSKPNGGEVVAVGEGHSAGKTKVDISVKTGAQVIYSKYAGTEVEFDGSKHLILKEDDIVGILETDDVKDLQPLNDRVLIKVAEAEEKTAGGLLLTEAAKEKPSIGTIIAVGPGPLDEEGNRKPLSVSPGNTVLYSKYAGSEFKGADGSDYITLRVSDVMAVLS	At5g20720	NP_001234423.1	9	99	9	6.356	0.0409868	5	3	8	29.6	protein.folding	Cp	50	1	Cp	Cp	Cp	Cp	99.7	plastid stroma	plastid	plastid
	Solyc06g075010	CPN60A-1	RuBisCO large subunit-binding protein subunit alpha; chaperonin (AHRD V1 ***- B2IXD2_NOSP7); contains Interpro domain(s) IPR001844 Chaperonin Cpn60	MASANGMSTASILSSSSKQVGLKGrRNAVNQLQGQKFNNKASKSRLVVRANAKDIAFDQKSRAALQAGIDKLVNVVGVTLGPRGRNVVLDEYDTPKVVNDGVTIARAIELADAMENAGATLIREVASLTNDAAGDGTTTASVLAREIIKHGLLSVTSGANPVSLKRGIDKTVNALVAMLErRNAARPVKGRDDIKAIASISAGNDDEIGTMIADAIDKVGPDGVLSIESSSSFETTVRVEEGMEIDKGYISPQFITNQEKLVVEFENARVLVTNADHDISAIKDIMPLLEKATQLRAPLLIIAGEVTGEALATLIVNKLRGILNVAAIRAPGFGQrRNAKALLQDIAIVTGAEYQAADLCMPVESTPVEALGFARKVTITKDSTTILADDVSKDEIQAR…	At2g28000	XP_004241283.1	11	52	8	2.3	0.0148316	5	2	7	1.3.13	PS.calvin cycle.rubisco interacting	Cp	47	1	Cp	Cp	Cp	Cp	96.3	plastid stroma	plastid	plastid
	Solyc11g069790	CPN60A-2	RuBisCO large subunit-binding protein subunit alpha; chaperonin 60A1 (AHRD V1 ***- B2IXD2_NOSP7); contains Interpro domain(s) IPR001844 Chaperonin CPN60	MASANAISTASIIPSPSKQGGLKNRKVSQLQGQRFGNKGAKNRFVVKACAKEIAFDQKSRSALQAGIDKLADAVGLTLGPRGRNVVLDEYGTPKVVNDGVTIARAIELPDAMENAGAALIREVASKTNDSAGDGTTTASVLAREIIKLGLLSVTSGANPVSLKRGIDKTVLGLIEELEKKARPVKGRDDIKAIASISAGNDESIGTMIADAIDKVGPDGVLSIESSSSLETTVHVEEGMEIDRGYISPQFVTNPEKLISEFENARVLVTDQKISAIKDIIPLLEKTTQLRAPLLIIAEDITGEALATLVVNKLRGILNVAAIKAPGFGErRNAKALLQDIAIVTGAEYQATDLGLLVENTPVEALGIARKVTITKDSTTIIADAASKDEIQSRIAQLKK…	At2g28000	XP_004251160.1	28	276	24	35.308	0.227684	5	3	8	1.3.13	PS.calvin cycle.rubisco interacting	Cp	60	2	Cp	Cp	Cp	Cp	96.3	plastid stroma	plastid	plastid
	Solyc02g068730	CPN60A2	Chaperonin 60 subunit alpha 2, chloroplastic	MSLSMCSPLYSPLKLSFKEDKGKGNSWGLRQSLGKKKLMVVRAGPKRIAFDKECRRALLSGINKLADAVSVTLGPRGRNVVLSEAGGLKIINDGVTIAQAIELPDTIEGATLIQEVATKTNRLAGDGTTTAIVLAREMIKAGLLAVDFGANPVSMKKGMDQTVRELVNTLKKKSHPVRGNDDIKAVASISAGNDEFIGSLIAEAINKIGPDGVICIESSSSAETSIMVEEGMKIDKGYMSPHFINNPEKSIVEFEKVLVTDQKICSVKEIVPLLEKATQLSVPLLIFAEDITNQVLETLVINKMQGMLNVAVVQCPGFRDGKKGVLQDIAMLTGADFLSGDLGLTLESATSDQLGIARKITITSNSTTIVAHPSTKAEIQARIMQIKKDLAETDNKSIS…	At5g18820	XP_004233243.1	3	4	2	0.334	0.00215381	2	0	2	29.6	protein.folding	-	-	5	-	possibly Cp	Cp	Cp	91	plastid stroma	plastid	-
	Solyc03g120850	CPN60B1	Chaperonin (AHRD V1 ***- B2IXD2_NOSP7); contains Interpro domain(s) IPR001844 Chaperonin CPN60	MAATFTSVCSISSTSQTVEKKIINSCETLSSFSGISLTSLGGrRNAKNNVLKKRNDSKIQAMAKELHFNQDGSAIKKLQAGVNKLADLVGVTLGPKGRNVVLESKYGSPKIVNDGVTVAREVELEDPVENIGASLVRQAASKTNDLAGDGTTTSVVLAQGLITEGVKVVAAGANPIQIARGIDRTTKALVSELKKLSKEVEDSELADVAAVSAGNNYEVGNMIAEALSKVGRKGVVTLEEGRGSENNLFVVEGMQFDRGYISPYFVTDNEKMVAEYENCKLLLVDKKITNARDLVNVLEEAIKNGYPILVIAEDIEQEALATLVVNKLRGALKIAALKAPGFGDRKSQYLDDIAILTGGTVIREEVGLYLDQAGSEVLGNAAKVVLSKDSTTIVGDGST…	At1g55490	XP_004235655.1	28	153	21	18.307	0.118053	5	3	8	1.3.13	PS.calvin cycle.rubisco interacting	Cp	58	2	Cp	Cp	Cp	Cp	99	plastid stroma	plastid	plastid
	Solyc01g028810	CPN60B2	RuBisCO large subunit-binding protein subunit beta; chaperonin (AHRD V1 ***- B4VMY1_9CYAN); contains Interpro domain(s) IPR001844 Chaperonin Cpn60	MASTFAGMSSAGPLAAPSTSSNKLSSVANISSTSFGSKRNVALKKSrRNAPTILAAAKELHFNKDGSAIKKLQNGVNKLADLVGVTLGPKGRNVVLESKYGAPKIVNDGVTVAREVELEDPVENIGAKLVRQAAAKTNDLAGDGTTTSVVLAQGLIAEGVKVVAAGANPVLITRGIEKTAKALVAELKNMSKEVEDSELADVAAVSAGNNLEVGSMIAEAMSKVGRKGVVTLEEGKSAENSLRVVEGMQFDRGYVSPYFVTDSEKMSVEYENCKLLLVDKKITNARDLVNVLEDAIRNGYPILIIAEDIEQEALATLVVNKLRGALKVAALKAPGFGERKSQYLDDIATLTGGTVIREELGLTLDKADKEVLGHAAKVVLTKDATTIVGDGSTQEAVNK…	At3g13470	XP_004228946.1	34	255	27	19.62	0.12652	5	3	8	1.3.13	PS.calvin cycle.rubisco interacting	Cp	52	1	Cp	Cp	Cp	Cp	99.9	plastid stroma	plastid	plastid
	Solyc01g111750	CPP1	Chaperone-like protein of POR1; Heat shock protein DnaJ domain protein (AHRD V1 *--- B7K9K5_CYAP7)	MATSLSVRPNRTIISSDPAGSTRPNPIRRPPISAHLPKIPNSDSFRRRRLVFTSHRRKLNPAVQAGSRADDSAPFEMSVELKLLGVTEGASFDDILRAKKSIISSCKDDPDTIAQVEAAYDMLLMQSLSQRRSGKVVDSSVRFADVKAASGMGSMPKWLQTTVKSSPVAVEAPASKELGVQAGVYGALMVLTYVNGASTPLGVSYGADVPGLILATSFGATLYFMTKKNVKLGKASVITIGGLVAGAVVGSAVENWLQVDIVPLLGIHTPATVKGTLIITGLDSCSEVQLLATLQIFRV	At2g20920	XP_010315389.1 Lee et al (2013)	1	2	1	0.194	0.00125101	2	0	2	35.2	not assigned.unknown	Cp	64	1	Cp	Cp	Cp	Cp	93.1	mitochondria envelope	plastid	plastid
	Solyc07g062610	DJ1B	DnaJ-1	MASATKKVLVPIANGTEPIEAIVPIDILRRAGAEVIVASVGNQLQIEVMYGIKIVADVLITDCVDTEFDLISLPGGVPGAANLGNCKILESIVKKQAENGKLYAAICAAPAIALGSWGLLKGLKATCYPSYMEELSSHAIAVESRVQKDAKVVTSRGPATSIEYAVALVEELYGKEKANEVSGPLVMRPNHSEEFAFAELNSVNWTLTSKPRILVPIANGSEEMEATIIIDVLRRAQVVVASMEDKLEIVASRKVKLVADVLLDEAAKQSYDLIVLPGGLGGAETFAKSEKLVDMLKKQRESSKPYGAMCASPALVLEPHGLLQGKKATAFPALCNKLSDPSEAENRVVVDGNLVTSRGPGTTMEFALAIADKFIGHKETLELAKEMIF	At1g53280	XP_004244263.1	4	9	4	1.61	0.0103821	4	3	7	35.1	not assigned.no ontology	-	-	4	-	-	Cp	C	94.83	plastid	plastid	-
	Solyc01g105340	DJA6	Chaperone protein dnaJ A7A, chloroplastic-like	MLANQKSKAVTYRKLARSYHPDVNKEPGAEQKFKEISYEVLSDDEKRSIYDKYGEAGLKGAGAGMGDFSFDLFESLFDGFGGMGGMGGMGGRGSRSRATEGEDQGYNLVLNFKEAVFGVEKEIEISRLETCGTCDGSGAKPGTKPSTCNTCGGQGQVVSSARTPLGVFQQVTTCSSCGGTGEISTPCGTCNGDGRVRKSKRISLKVPPGVDSGSRLRVRSEGGRRGGPPGDLFVMIEVLPDPVLKRDDTNILYNCKVSYIDAILGTTMKVPTVDGMVDLKIPAGTQPGTTLVMAKKGVPFLSKPNMRGDQLVRVQVEIPKRLSSEERKLIEELANLNKPKAATNSKR	At2g22360	XP_004230549.1	8	36	8	2.981	0.019223	5	1	6	20.2.1	stress.abiotic.heat	M	101	4	-	possibly M	Cp	M	60.03	thylakoid	plastid	-
	Solyc03g116790	DJA7	Chaperone protein DnaJ (AHRD V1 ***- B6TAJ2_MAIZE); contains Interpro domain(s) IPR012724 Chaperone DnaJ	MNSTAMASTASLSLRPSSLISDRSHSPCLPPSSSSSFFSGGTRLWAHTKFISISFSSSQKIPGrRNAFGRLVVAAAADYYSTLGVPKSANSKDIKAAYrRNALARQYHPDVNKEPNAPEKFKEIKDAYEILSDDKKRALYDQYGEAGVKSSVGAQAGAYTTNPFDLFETFFGPSMGGFGMDGAGFGTrRNARSTVTKGEDLRYDMTLEFSAAIFGAEKDFELSHLETCEVCVGTGAKVGSKMRICSTCGGRGQVMRTEQTPFGMFSQVSVCPNCGGDGEMISEYCRKCSGEGRIRVKKDIKVKIPPGVNKGSILRVAGEGDAGPRGAPPGDLYVYLDIEEIPEIQRDGINLISTVSVGYLDAILGAVVKVKTVDGLTDLQIPPGTQPGDVLVLARKGAP…	At1g80030	XP_004235949.1	5	16	5	0.995	0.00641628	5	2	7	20.2.1	stress.abiotic.heat	Cp	71	1	Cp	Cp	Cp	Cp	98.8	thylakoid	plastid	plastid
	Solyc03g117590	DJA8 TOC 12	Chaperone protein DnaJ (AHRD V1 *-*- C5UZI2_CLOBO); contains Interpro domain(s) IPR001623 Heat shock protein DnaJ, N-terminal	MATMGMTGSIGGYGAASASLFRLRNSAKKKTRNGKNGFRVSCVCSSSAVADPYKTLKIQPGASESEVRKAFRQLALKYHPDVCRGNNCGVQFHQINEAYDVVMSNLRGETRAELEMIEEYDDSNDESMRGMHEPDWDLWEEWMGWEGAGIRDYTSHVNPYI	At1g80920	NP_001233835.1	1	3	1	0.778	0.00501695	3	0	3	20.2.1	stress.abiotic.heat	Cp	45	2	Cp	Cp	Cp	C	90.7	stroma	-	-
	Solyc06g068500	DJA8 TOC12	Chaperone protein DnaJ 8 (AHRD V1 *-*- D8USE3_9MICC); contains Interpro domain(s) IPR001623 Heat shock protein DnaJ, N-terminal	MATAMGMMRNVGGYGSASASWIRLKNRANKKTKRSENVKFGVTCVYSPSLSDPYKTLRIQPDASESDVRKAFRQLALQYHPDVCRGSNCGIQFHQINDAYDTVMSNLRGETKNAEMEIYEEYDDDDEAMRGVNDPDYDMWEEWMGWEGAGIRDYSSHINPYI	At1g80920	XP_004241676.1	1	1	1	0.468	0.00301791	1	0	1	20.2.1	stress.abiotic.heat	M	109	5	Cp	Cp	Cp	C	50.6	stroma	-	-
	Solyc12g056850	DJC65	Co-chaperone protein DnaJ (AHRD V1 *-*- A7I1Z6_CAMHC); contains Interpro domain(s) IPR001623 Heat shock protein DnaJ, N-terminal	MSNLRSICRPQVVYFSITCCCRDLLGKSAVRVSNWNLSSVSRWTKPPVLQSWYHTSSRMETWNADHRLNQQRKMVTTSAYNWNDSKSPYETLELEGDADEEQIKVAYRRLAKFYHPDVYNGRGTLEEGETAEARFIKIQAAYELLIDADERRKYDKDNRVNPMKASEAWVEWLMKKRKAFDQRGDMAIAAWAEQQQLELNLKARRLARSKMDPEEERRIIAKERKASVENFNNTLKRHTLVLRKRDIMRRKSEEEKKRVISRLLAAEGLELAEEDDKNL	At1g77930	XP_004252553.1	2	7	2	0.701	0.00452041	5	0	5	27.3.99	RNA.regulation of transcription.unclassified	M	107	5	Cp	-	Cp	C	99.9	-	-	-
	Solyc09g015360	DJC73	Co-chaperone protein DnaJ (AHRD V1 *-*- A7I1Z6_CAMHC); contains Interpro domain(s) IPR001623 Heat shock protein dnaj, N-terminal	MYFLRWPFTVKGKEQNVKLLIWKACNQQRRMDFASVLSQKPVNNFHFPQNLRELTSRFVCRIEYGSFAIPRRMCFSNSLGSYYWKKRKKYKHILVKASRKESPYEVLGVSSSATADEIKKAYRKLALKYHPDVNKEQNAQEKFMRIKHAYNTLLNSKTRRRYDSRSDTSSYSYYNGAERNRSAADEEDFYSFADFFKDLQEEFRNWEANVASTGKPKSLWEELAEIGEEFVEFLEKELNITDADVEDENNNERPQKGNAQSGTSNEKQMRTDKDNSIEENIDEIEAALAQLKKELGL	At5g59610	XP_004246295.1	4	6	4	1.031	0.00664842	4	2	6	20.2.1	stress.abiotic.heat	-	-	5	Cp	M	not Cp	C	99.9	-	-	-
	Solyc07g055260	DJC77	Chaperone protein dnaj 10 (AHRD V1 *-*- B6TAW2_MAIZE); contains Interpro domain(s) IPR003095 Heat shock protein dnaj	MAQLLSPVCTDSLKLQNTVQCFYTRSKVPILGNNFSSMGVFGKKRGGLGRIKVAYQDSAAASEEIADDFYAVLGLLPDATPAQIKKAYYSCMKACHPDLSGDDPETTNFCMFINEVYEILSDPVQRRVYDEIHGYTATAINPFLSDSSPKNADHVFVDEFSCIGCKNCANVCSKVFGIEEDFGRARVYDQCGHPDLIQQAIDSCPVDCIHWTSAAQLSLLEDEMRRIERVNVALMLSGMGSGAMDVFRMASTRWEKRQSKVLEQAKVRMMKKKNSEKTESYWDNLWGDRKDYTKTEEEVEDRSKRAAAAARKWREYSRRGADKPPTFKLPEAISNDN	At2g42750	NP_001317628.1	1	3	1	0.179	0.00115428	3	0	3	20.2.1	stress.abiotic.heat	-	-	5	Cp	possibly Cp	Cp	C	99.9	-	plastid	-
	Solyc06g076020	HSC70-1	Heat shock congate protein IPR013126 Heat shock protein 70	MAGKGEGPAIGIDLGTTYSCVGVWQHDRVEIIANDQGNRTTPSYVGFTDTERLIGDAAKNQVAMNPINTVFDAKRLIGRRFSDASVQEDMKLWPFKVIPGPGDKPMIVVTYKGEEKEFAAEEISSMVLTKMKEIAEAFLGSTVKVVTVPAYFNDSQRQATKDAGVISGLNVMRIINEPTAAAIAYGLDKKATSAGEKNVLIFDLGGGTFDVSLLTIEEGIFEVKATAGDTHLGGEDFDNRMVNHFVQEFKRKHKKDITGNPRALRRLRTACERAKRTLSSTAQTTIEIDSLYEGVDFYSTITRARFEELNMDLFRKCMEPVEKCLRDAKMDKSTVHDVVLVGGSTRIPKVQQLLQDFFNGKELCKSINPDEAVAYGAAVQAAILSGEGNEKVQDLLLLD…	At5g02500	NP_001234491.2	9	44	1	1.913	0.012336	1	0	1	20.2.1	stress.abiotic.heat	-	-	2	-	-	Cp	C	94.62	-	cytosol	-
	Solyc01g103450	HSC70-2	Chaperone DnaK (AHRD V1 ***- Q1SKX2_MEDTR); contains Interpro domain(s) IPR012725 Chaperone DnaK	MASSTAQIHALGATYFANSSSSTRKPLKSVFLGQKLNNRTLAFGLKQKKSRGNNGGYAPMRVVAEKVVGIDLGTTNSAVAAMEGGKPTIVTNAEGQRTTPSVVAYTKSGDRLVGQIAKRQAVVNPENTFFSVKRFIGRKMNEVDEESKQVSYNVIRDENGNVKLDCPAIGKSFAAEEISAQVLRKLVDDASKFLNDKVSKAVVTVPAYFNDSQRTATKDAGRIAGLEVLRIINEPTAASLAYGFEKKSNETILVFDLGGGTFDVSVLEVGDGVFEVLSTSGDTHLGGDDFDKRIVDWLAASFKRDEGIDLLKDKQALQRLTETAEKAKMELSSLTQTNISLPFITATADGPKHIETTITRGKFEELCSDLLDRLKTPVQNSLRDAKLSFSDIDEVILVG…	At5g49910	XP_004230445.1	41	493	31	58.078	0.374517	5	3	8	20.2.1	stress.abiotic.heat	Cp	63	1	Cp	Cp	Cp	Cp	60	plastid stroma	plastid	plastid
	Solyc11g020040	HSC70-2	Chaperone DnaK (AHRD V1 ***- Q1SKX2_MEDTR); contains Interpro domain(s) IPR012725 Chaperone DnaK	MASSATHQVKIPFSGHKLDNRTPFSGGRISFASRKKCYSDKAVRQRFRPMKVVNEKVVGIDLGTTNSAVAVMEGGKPTIVTNAEGQRTTPSVVAYTKNGDRLVGQIAKRQSVVNPENTFFSVKRFIGRKMAEVDEESKQVSYRVMKDENGNVKLECPAIGKQFAPEEISAQVLRKLVDDASKFLNDKVAKAVVTVPAYFNDSQRTATKDAGRIAGLDVLRIINEPTAASLAYGFEKKSNETILVFDLGGGTFDVSVLEVGDGVFEVLSTSGDTHLGGDDFDKRIVDWLADTFRKEEGIELLKDKQALQRLTEAAEKAKIELSTLTQTNISLPFITATADGPKHIDTTFTRAKFEELCSDLLDRLKTPVETALKDASLSFKDIDEVVLVGGSTRIPAVQN…	At5g49910	NP_001233780.2	13	97	3	1.865	0.0120265	3	1	4	20.2.1	stress.abiotic.heat	Cp	69	3	Cp	Cp	Cp	C	80.5	plastid stroma	plastid	plastid
	Solyc05g010670	HSP90-5	Chaperone protein htpG (AHRD V1 ***- HTPG_MYXXD); contains Interpro domain(s) IPR001404 Heat shock protein Hsp90	MAPVVSRSLTSSPMASVPYSPSFVLGSGSTNRVCLKTTFLPRNNIKNGFLQSGLRWKQDKRDVGVVVRCEASAVAEKEASETSGETHEYQAEVSRLMDLIVHSLYSHKEVFLRELVSNASDALDKLRFLSLTEPSLLGDSSELEIRIKPDPDNGTVTITDTGIGMTKEELIDCLGTIAQSGTSKFLKALKENKDLGADNGLIGQFGVGFYSAFLVAQKVVVSTKSPRSDKQFVWEAEADSSSYVIREETNPENLLTRGTQITLYLRDDDKYEYCEPKKIQDLVKNYSQFVSFPIYTWQEKSRTIEVEEEEEPKEGEEKTEEEKKMTKKTKTEKYFDWELTNETKPIWMRNPKEVEKEQYQEFYKRTFNEFLDPLAHTHFTTEGEVEFRSVLYIPGMAPL…	At2g04030	XP_004239010.1	23	166	23	10.325	0.066581	5	3	8	20.2.1	stress.abiotic.heat	Cp	51	2	Cp	Cp	Cp	C	68	plastid stroma	plastid	plastid
	Solyc06g082970	NDHU CRRL	NAD(P)H-quinone oxidoreductase subunit U, chloroplastic (NCBI); DnaJ domain family (AHRD V1 ***- Q84VQ4_ARATH); contains Interpro domain(s) IPR001623 Heat shock protein DnaJ, N-terminal	MAATPNIYTQKFPTITTQNYIASNNVTCFIDFRKQSRKLALIVGNSSSSDTASAIDTDETSPVEIPPSIISALNVEKALLGIAITDINHYGILGLSRKCSYAEVPVAYKKKIEEITNEGLVEEELNKKLQLLKESYSILSTPEERRLYDWSLVRSEAPDDYKWPFEVDPTPPSTGTPPPQEPEDVEPTILVGYFFLGWFVLAAVLSISLNL	At5g21430	XP_004242446.1	3	14	3	3.642	0.0234855	5	0	5	20.2.1	stress.abiotic	Cp	43	5	Cp	possibly Cp	Cp	C	72.8	thylakoid-integral	plastid	plastid
	Solyc01g006130	PSA2	Photosystem I assembly 2, chloroplastic (NCBI) (AHRD V1 *-*- Q010T6_OSTTA); contains Interpro domain(s) IPR001305 Heat shock protein dnaJ, cysteine-rich region; PSII assembly	MASHLSFSTPSALWGSYLNPKSSSLSQLNMKKRVGSHVNCSSEDESCTSASSEHLREHVEEKRSQTSVSRRWCLTCLCSTGALITASGNPISEPRAIALDGNESPGCRNCGGSGAIICDMCGGTGKWKALNRKRAKDVYEFTECPNCYGRGKLVCPVCLGTGLPNNKGLLRRPDARKLLDKMYNGRLLLKAVLHQKDNEKRLKVTMDVTTIVLLSVPVKSLDELSFSP	At2g34860	XP_004228692.1	2	2	2	-	0	0	1	1	29.6	protein.folding	Cp	39	1	Cp	Cp	Cp	C	72.1	thylakoid-peripheral-lumenal-side	plastid	plastid
	Solyc11g006060	RAF1	RuBisCo accumulation factor	MFSLTVNSPKSLSLSTPFLPSHPHPIPTITHKPNLSPRPISALIIPPSGQRNQQYSTAPPQQQQLYQPFRPPPSPLPPKFRNLDTNSKLEVLANRLGLWYEYAPLIPSLTSEGFTPSTLEEITGITGVEQNRLVVAAQVRETLVECGLDEETLSFFESGGAELLYEIRLLSGKQRTDAASFIVRNGFDMKQAQDLARSMKDFPRRRIDYGWDKFTGDSPGDCLAFWFFRLAQEHAAAAAEDSRVEAMEKALEVVETESARNVLVEVLEGKGVDKESVIDEQVKVPLVRMKLGEVAESTKVVVLPVCKAEKREFEVEAAPWECGGVGEFGVVEAEKDWRRWVVLPGWQPIAGLERGGVAVSFKNGKLLPWKEKRKYKEEPVLVVADRGRKEVVVDDGFYL…	At3g04550	XP_004249913.1	12	72	12	6.079	0.0392005	5	3	8	35.2	not assigned.unknown	Cp	92	3	Cp	-	Cp	Cp	99.3	plastid stroma	plastid	-
	Solyc01g087190	RBCX2	Chaperonin-like RbcX protein 2, chloroplastic	MVGTISGSGRSLAETHSTPCLCLNPSRNSGSTNFRSNRELGLWRTFKGRKQLNLSSSFLEAWCEWRLSAKMVSLALNGGSRKRQKIRKLTVVGGLEVEDDDSGEDVKNEIINVITYKAVRTVLQQLYEMNPPQYTWFYNFIVNHVPNTGKNFLQQLFKEKRELAERVMITRLSLYSIWMQKCNADHAELYNRISDENVELMRERLAQTVIWPSDDDQIAGSLD	At5g19855	XP_004229629.1	2	7	2	0.468	0.00301791	4	3	7	35.2	not assigned.unknown	Cp	26	2	Cp	possibly Cp	Cp	N	49.1	plastid stroma	plastid	-
	Solyc11g065740	RBCX2	RbcX protein (AHRD V1 *-*- Q5W3L8_9NOST); contains Interpro domain(s) IPR003435 Chaperonin-like RbcX	MVGAFSVVGSPMVDSHSSPCLCLDALPTCNLGIGDSLVRKQKQLPRLGTMELSTSFVDLRFSAKCVKGNYKNLKKQTKGRKNLRIVNDLGGQYEESFSDIKTQILNYFTYKAVRTVLNQLNEMNPPQYHWFNDYVTANKPSDGKRFIRNLAKEKQELAEKVMATRLSLYAKWIKKCNADHEEIYNRISDQNVEVMRERLMETVIWPSDDTNTGMK	At5g19855	XP_004250941.1	1	2	1	0.334	0.00215381	2	3	5	35.2	not assigned.unknown	-	-	4	-	Cp	not Cp	C	86.4	plastid stroma	plastid	-
	Solyc04g081320	SPA LQY1	SPA; Arabiopsis homolog is LOW QUANTUM YIELD OF PHOTOSYSTEM II 1, LQY1	MLTAPSLSRFKSPFISSPLKLPTLSSSFFTQKFHQTCRRRNSYPCIKAVDLDQNTVIAITVGVLSVAIGVGIPVFYETQIDNAAKRENTQPCFPCTGTGAQKCRFCMGTGSVTVELGGGETEVSRCINCDGAGGLTCTTCQGSGIQPRYLDRREFKDDD	At1g75690	NP_001307325.1 Bermúdez et al (2014)	1	3	1	-	0	0	3	3	29.6	protein.folding	Cp	65	3	Cp	M	Cp	Cp	98.2	plastid	plastid	plastid
Peptidyl-prolyl cis/trans isomerases	Solyc01g009990	CYP20-2 PNSL5	Peptidyl-prolyl cis-trans isomerase (AHRD V1 ***- B9RMA5_RICCO); contains Interpro domain(s) IPR002130 Peptidyl-prolyl cis-trans isomerase, cyclophilin-type	MAATFASVSNLGSISVPRVANPTYAAYPKLLKSSFSSSSLFGGSLRLDTSSNRSVHKKTGGSSGSIQAAVEVADLQSKVTNKVYFDISIGNPVGKLAGRIVignaLYGDDVPQTAENFRALCTGEKGFGFKDSAFHRVIKDFMIQGGDFDKGNGTGGKSIYGRTFKDENFKLVHTGPGIVSMANAGPNTNGSQFFICTVKTPWLDQKHVVFGQVLEGMDIVKLIESQETDRGDRPRKRVVISDCGELPIV	At5g13120	XP_004228428.1	10	191	10	30.623	0.197473	5	3	8	31.3.1	cell.cycle.peptidylprolyl isomerase	Cp	67	1	Cp	Cp	Cp	Cp	99.9	thylakoid-peripheral-lumenal-side	plastid	plastid
	Solyc03g119860	CYP26-2	Peptidyl-prolyl cis-trans isomerase (AHRD V1 *-*- D8U4U4_VOLCA); contains Interpro domain(s) IPR002130 Peptidyl-prolyl cis-trans isomerase, cyclophilin-type	MQSSAQFLQPPATPLPPKQIQSTTISKCIKFSRRELTISTSSSVLLLLGSQAIEPLNLSRARADELPPDNPDKTEPEQEPSRKIEYCSNQNVTKKAFLEVSVDGEPIGRIVignaLYGDSAPFGSSRFSNLVSGAAGVSYRRKDFVRIMPNYVQHGGLRSYGVDAELAKNTGRTMAIDNLVDEWVKQSEMCQGTKNVATSVSLIVRDPSKPPPKMKLVARGGKLEIDQEEVGKDVNGTEFTIALKDSPELDASALVignaSVLEGMDVVEKLGQVKTVKENTTSPYFRAAKLIGDKRAVVAERGFNRPYSKVKITNCGLME	At1g74070	XP_004235731.1	5	16	5	0.995	0.00641628	5	3	8	31.3.1	cell.cycle.peptidylprolyl isomerase	Cp	21	2	Cp	-	Cp	Cp	99.8	plastid	plastid	plastid
	Solyc07g007110	CYP28	Peptidyl-prolyl cis-trans isomerase (AHRD V1 ***- D7MHP4_ARALY); contains Interpro domain(s) IPR002130 Peptidyl-prolyl cis-trans isomerase, cyclophilin-type	MGCSATLLPTPPHLRRHSTSAFPPTPHLNRRKLLFLSTTLTFPSTISTSVAAPPPSPDTTITERVFLDLSICPNYFKNRNLGDDLSNCADSEPIGRLVLGLYGNLVPITVSNFKAMCTGSSGSTYKGTLVQKIFPGQFFMAGRQGRRDKGEVKPPLKLIRNVESIESKAFLLEHSRAGVVSLPLAENDDDDDLKLNPNYHNVEFLITTGPGPCPQLDSKNIVFGTVLEGLDIVTTIAAIPTYKPSENIRQYNDFAELIGDGRAKTARAIWNKPLKTVYISDCGELKVAKPTLSPSLP	At5g35100	XP_019070514.1	7	34	7	3.217	0.0207449	5	3	8	31.3.1	cell.cycle.peptidylprolyl isomerase	Cp	47	4	Cp	Cp	Cp	Cp	99.9	plastid	plastid	plastid
	Solyc12g013580	CYP37	Peptidyl-prolyl cis-trans isomerase cyclophilin-type (AHRD V1 ***- A8INE5_CHLRE); contains Interpro domain(s) IPR002130 Peptidyl-prolyl cis-trans isomerase, cyclophilin-type	MASPLSSSIFSPNFTHLYQNKAFFHSHLPLRSPIYATLNRIALKKNASMELTKRLTAPSILSTYLESTVKQFQSLMAVIIIFTEIASPIPLYGLQDLSISPAEAVLYSPETKTLPRTGELALRRAIPANTNMKTIQDSLEDISYLLRIPQRKPFGTMEGNVKKALKIATDEKASILASIPAELKEEGSVLYTSLVDGKGGLQKLLQYIKDKDPDKVSVCLASTLDTIAQMELLQAPGLSFLLPQQYVKYPRLTGRGIVEFTVEKVDGSAFSPESAGEAKSTAKIQVVIDGFSAPLTAGNFAKLVVDGAYDGMKLTCANQAILSDSEVGKTTGYSVPLEIKPAGQFEPLYRTTLSIQDGELPVLPLSVYGAVAMAHSDVSDENSSPSQFFFYLYDKRNSG…	At3g15520	XP_004251848.1	7	30	7	1.683	0.0108529	5	3	8	31.3.1	cell.cycle.peptidylprolyl isomerase	Cp	46	3	Cp	Cp	Cp	Cp	100	thylakoid-peripheral-lumenal-side	plastid	plastid
	Solyc02g086910	CYP38	Peptidyl-prolyl cis-trans isomerase cyclophilin-type (AHRD V1 ***- A8IRU6_CHLRE); contains Interpro domain(s) IPR002130 Peptidyl-prolyl cis-trans isomerase, cyclophilin-type	MAASVSCHYFSSPLTTSTKSIKPKLNYSHFAPALSKGSIRHFVPLCSSQRSLPSESECQDKEKDWFLSLKKCAAAVALSVSLISGLPGSQWLGPAHASTPALPDVSVLISGPPIKDPGALLRYALPIDNKAIREVQKPLEDITDSLKIAGVKALDSVERNTRQASRALKEGKTLIISGVAKSKTNADHAIELLNKLEAGLGELQQIVEDRTRDAVAPKQKELLNYVGGVEEDMVDGFPYEVPEEYQNMPLLKgranaTVDMKVKVKDNPNLEECVFRIVLDGYNAPVTAGNFIDLVERHFYDGMDIQRADGFVVQTGDPEGPAEGFIDPSTEKTRTVPLEIMVVGEKAPFYGETLEDLGLYKAQTRLPFNAFGTMAMAREEFENNSASSQVFWLLKESE…	At3g01480	XP_004232290.1	13	194	13	19.691	0.126978	5	3	8	29.6	protein.folding	Cp	45	3	Cp	Cp	Cp	Cp	98.9	thylakoid-peripheral-lumenal-side	plastid	plastid
	Solyc08g006540	FKBP13	Peptidyl-prolyl cis-trans isomerase IPR001179 Peptidyl-prolyl cis-trans isomerase, FKBP-type	MKPIRGKIFIGGNKFTSLLHLCPLSFLSVLKILCLVEMNSIPFSIVTYIPSKQPLLHCTKTSQTTTDPIPHFIKSSILSSSSKSVNKLAEKISPLPSSFSRRETLSACGLGFSAVLFEALLQPQSNIEAIAEEAAATECEFTVTPSGLAYCDKAVGYGPEAVKGQLIKAHYVGKLENGKVFDSSYNRGKPLTFRVGVGEVIKGWDQGILGGDGFPPMLTGGKRKLKIPPELGYGIRGAGCRGGTCIIPPDSVLLFDVEFVGKA	At5g45680	NP_001309044.1 Waseem et al (2018)	6	38	6	2.831	0.0182558	5	3	8	29.8	protein.assembly and cofactor ligation	-	-	5	-	possibly M	Cp	Cp	77.31	thylakoid-peripheral-lumenal-side	plastid	plastid
	Solyc10g005870	FKBP16-1	Peptidyl-prolyl cis-trans isomerase IPR001179 Peptidyl-prolyl cis-trans isomerase, FKBP-type	MAAPQFRTNFRSRCFFASQRQCFEDFEHWKIVVPKSTDERMPSINVKKLLRRSVLQFVGLSPIFISIRPVLSAPMHEMREPDIIRTLKLDSGVRLQDVVEGEGPEAREGDIVEINYVCRRSNGYFVHSTVDQFSGESAPVILPLDDKQIIEGLKEVLIGMKPGGKRRALIPPSVGYISENLKPVPEEFGPRRSLMSHMKEPLIFEVQLLKVLP	At4g26555	XP_010327205.1 Waseem et al (2018)	3	18	3	1.154	0.00744159	5	3	8	29.6	protein.folding	M	16	4	-	-	Cp	M	58.37	plastid	plastid	-
	Solyc04g054520	FKBP16-2	Peptidyl-prolyl cis-trans isomerase (AHRD V1 *-*- D8PA41_9BACT); contains Interpro domain(s) IPR001179 Peptidyl-prolyl cis-trans isomerase, FKBP-type	MAVSSLSFTLPKLQTFTPKPTIAATFKASSSHESTPFINKKQIFQMGVGILAASIVASAPLDADATRIEYYATTAEPTCEFNFVRSGLGYCDIAVGSGEEAPYNKLVNIHYTARFGDGIVFDSSYKRGRALTMRLGMGKVIKGLDQGILGGEGVPPMLVGGKRKLQIPPHLAYGPEPAGCFSGDCNIPGNATLVYDIKFVELYSGNRKM	At4g39710	NP_001329278.1 Waseem et al (2018)	4	7	4	4.179	0.0269484	4	3	7	29.6	protein.folding	Cp	51	5	Cp	Cp	Cp	Cp	85.5	thylakoid-peripheral-lumenal-side	plastid	plastid
	Solyc04g015040	FKBP16-3	Peptidyl-prolyl cis-trans isomerase (AHRD V1 ***- C1FEU4_9CHLO); contains Interpro domain(s) IPR001179 Peptidyl-prolyl cis-trans isomerase, FKBP-type	MASTSLVLPLSSAFSINLFKNHHQRIRKLQTGNGVTREFGLRLWAQENLMGTVEEAERYNTTKRRDLVMGLGFCGVTSFLVGSCYAEAAGLPPEEKPKLCDATCEKELENVPMVTTESGLQYKDIKVGRGPSPPVGFQVAANYVAMVPSGQIFDSSLEKGRPYIFRVGADQVIKGLDEGILSMKVGGLRRLYVPGSLAFPKGLISAPGRPRVAPNSPLVFDVSLEFIPGLESDEE	At2g43560	NP_001352846.1 Waseem et al (2018)	6	93	6	15.681	0.101119	5	3	8	29.6	protein.folding	Cp	53	2	Cp	Cp	Cp	ER	66.4	thylakoid-peripheral-lumenal-side	plastid	plastid
	Solyc09g008650	FKBP16-4	Peptidyl-prolyl cis-trans isomerase (AHRD V1 ***- B8HUH5_CYAP4); contains Interpro domain(s) IPR001179 Peptidyl-prolyl cis-trans isomerase, FKBP-type	MNLFLYHPLKATPFLHSLPSTPFSGNRPFSANCSRTALPCVCLSKSSLDVPEKNISQQNEGRRAMMGSFLIAAAGLCLCDVAGAASTSRRALRGAKIPESEYTTLPNGLKYYDLKVGAGAEAVKGSRVAIHYVAKWRNITFMTSRQGMGVGGGTPYGFDVGQSERGTVLKGLDLGVQGMRVGGQRLLIVPPELAYGKKGVQEIPPNATIEMDIELLSIKQSPFGTPVKIVEG	At3g10060	NP_001352847.1 Waseem et al (2018)	1	1	1	0.212	0.00136709	1	0	1	29.6	protein.folding	M	29	5	Cp	possibly Cp	Cp	Cp	100	thylakoid-peripheral-lumenal-side	plastid	plastid
	Solyc02g069130	FKBP17-1	Peptidyl-prolyl cis-trans isomerase (AHRD V1 *-*- B1WW43_CYAA5); contains Interpro domain(s) IPR001179 Peptidyl-prolyl cis-trans isomerase, FKBP-type	MRMIKVLPLPCPTYLYLHKIEASTSSTHKSRRAFSLSALTISLSALVFSSGNAPTTSISWANPQVPKFLDLPNSGGVKALDLRVGDGETPIDGDLVAIHYYGRLAAKQGWRFDSTYNADHKDETGEPIPFSFVLGSGKVISGIETAVKSMKVGGLRRVIIPPSQGYQNTSQEPLPPNYFDRQRLFTTIFNPTRLANGEGATLGTVIFDIELVSLRHL	At4g19830	XP_004233225.1 Waseem et al (2018)	3	8	3	1.683	0.0108529	5	3	8	29.6	protein.folding	M	41	5	Cp	-	Cp	ER	98.4	-	-	-
	Solyc03g119150	FKBP17-3	Peptidyl-prolyl cis-trans isomerase (AHRD V1 *-*- B4VX45_9CYAN); contains Interpro domain(s) IPR001179 Peptidyl-prolyl cis-trans isomerase, FKBP-type	MATLFGSTPSLSHPITRTNFSSSSQTPPPSQPPNQNPQPQTPLPSQPLSATAAEPPSPVNVQQQKPSKSARLSASADSTDWIASSLTrRNAFGLGAGLAWAGFLAFGVVSEQIKTRLEVSQQETNTRVVEKEEEVVLPNGIRYYELKIGGGATARPGDLVVIDVKGSIQGSGEVFVDTFGGDGMKKRPLALVMGSRPYSKGICEGIETVLKSMKAGGKrRNAVIIPPNLGFGEEGADLGTGLQIPPSATLEYVVEVEKVSIAPA	At1g18170	NP_001352851.1 Waseem et al (2018)	2	2	2	0.668	0.00430761	2	3	5	29.6	protein.folding	Cp	73	1	Cp	Cp	Cp	Cp	94.4	thylakoid-peripheral-lumenal-side	plastid	plastid
	Solyc04g082660	FKBP18	Peptidyl-prolyl cis-trans isomerase (AHRD V1 *-*- A8YBJ2_MICAE); contains Interpro domain(s) IPR001179 Peptidyl-prolyl cis-trans isomerase, FKBP-type	MAATLSIQGSCIIRNSSNSSNAHTEQQVKKVFLQLPVSrRNASVILISVLPLSLNLVPQPSTARErRNANKKNIPLEDYQTTSDGLKYYDILEGKGPVAEKGSTVQVHFDCVYRNITAVSSRESKLLAGNRIISQPYEFQVGAPPGKERKRDFVDNPNGLFSAQAAPKPPKAMYTITEGMKVGGKRTVIVPPEAGYGSRGMNEIPPGATFNLNIELLEVKSSERKQ	At1g20810	XP_004238450.1 Waseem et al (2018)	3	7	3	0.778	0.00501695	4	2	6	29.6	protein.folding	Cp	60	1	Cp	Cp	Cp	Cp	99.6	thylakoid-peripheral-lumenal-side	plastid	plastid
	Solyc11g033284	FKBP19	Peptidyl-prolyl cis-trans isomerase (AHRD V1 *-*- Q8DnaJW8_THEEB); contains Interpro domain(s) IPR001179 Peptidyl-prolyl cis-trans isomerase, FKBP-type	MATPSFSFHPIPNFTINSSSSSSSSSRLRHRQIVPSLDLSASSDGTQSLDCRLVFDrRNAQVLLSSVGVIATSICNAgranaSAEFADMPALRGKDYGKTKMRYPDYTETQSGLQYKDLRVGSGPTPKSGDTVVVDWDGYTIGYYGRIFEARNKTKGGSFEGDDKDFFKFRVGSQEVIPAFEEAITGIALGGIrRNAIIVPPELGYPNYDYDKKGTKSFEFCAEEPRID	At5g13410	NP_001352867.1 Waseem et al (2018)	3	19	3	6.197	0.0399615	5	0	5	29.6	protein.folding	Cp	77	1	Cp	Cp	Cp	Cp	98.31	thylakoid-peripheral-lumenal-side	plastid	plastid
	Solyc10g039270	FKBP20-2	Peptidyl-prolyl cis-trans isomerase (AHRD V1 *-** C6E462_GEOSM); contains Interpro domain(s) IPR001179 Peptidyl-prolyl cis-trans isomerase, FKBP-type	MLLNSSFLLSNISLSYTLSACHTTQSFPRQKSTFQCCLAATLQDKRVRELNVNILHYEDNMKRRSLLFFLITSGISPAFPAFGKTKSKNPYDERRLLEQNKRIQRENNAPEEFPSFIREGFTVKVVTPENYEKRDSGLILRDFSVGEGDCPKDGQQVTFHYIGYNESGRRIDSTYVQGSPAKIRMGTKALVPGFEEGIRDMRPGGKRRIIIPPELGPPVGPSTFFSSKQFEVFDVELLDVQDCKRRTIGFYSDVVCN	At3g60370	NP_001352870.1 Waseem et al (2018)	5	13	5	1.154	0.00744159	5	2	7	29.6	protein.folding	Cp	38	5	Cp	possibly M	Cp	Cp	90.3	thylakoid-peripheral-lumenal-side	plastid	plastid
	Solyc12g099800	-	Rhodanese-like domain containing protein (AHRD V1 *--- B1XHS0_SYNP2); contains Interpro domain(s) IPR001763 Rhodanese-like	MLRISSSSSSLHVPSICGAPVSFILSFLNPSSRKVSNFTRLALLHSTTLFPNSRNFQFPTFRRVSTMMGRTHSCSRVVTASYSAASGPGGSSGGDREILVQHLLVKEDDQKLLLDLQKKTAEGEDLSDLAVEYSMCPSKEDGGMLGWVRKGQMVPEFEEAAFGAPLNKVVKCKTKFGWHLLQVLSEREESVLEHIQPNEFHVRLQDPSFLEEAQLIDVREPEEVAQASVPGFQILPLRQFGVWGPEITTKFDPQKDTYVLCHHGVRSLQVAKWLQTQGFRKVFNVAGGIHEYAVKVDPSIPTY	At5g19370	XP_004252885.1	11	38	11	5.952	0.0383816	5	3	8	26.23	misc.rhodanese	Cp	65	1	Cp	possibly M	Cp	Cp	96.5	plastid	plastid	-
	Solyc07g064950	TIG-like	Trigger factor-like protein (AHRD V1 ***- Q9FLP1_ARATH); contains Interpro domain(s) IPR005215 Trigger factor	MATPISIQLNPSILSFPSNSTKAQFFQLNDKFLLKPNLSSRQFSSSLVASARLVAAAAAAASGVVETVEDKLPADLHVTETQEPNSRIRLTVEVPTVVCEDCYKQVIKEFMrRNASKVPGFRPGKNVPEDILVGFVGKQNIQNAVVEAILKRTLPHAMSSVTRNAYEDSIRIVTKFEDMEKTYLSLNCLRYDVVVDVAPEIKWKPDDAYKNIKVAVELDSDMDAQRASEKELIrRNAHKSLGALKIVTDRGLQVGDVAVIDISATTIEQDGSDAKTIPAAESKGFNFDTEEGDNVLPGFRDSIIGIKRGETKSFPLVFPDSWKQEDLRGVHAQFTVACKELFYRDLPELNDAMAERLLPGCSSIEEVKQALLQRCLEVEQAAKDQATDNAILDQLYKMV…	At5g55220	NP_001352886.1	25	166	25	9	0.0580367	5	3	8	29.6	protein.folding	Cp	55	2	Cp	Cp	Cp	Cp	88.6	plastid stroma	plastid	plastid
	Solyc06g074890	TIG-like	Trigger factor-like (AHRD V1 *-*- B4W095_9CYAN); contains Interpro domain(s) IPR008881 Trigger factor, ribosome-binding, bacterial	MAMTMTTAMASPSRRLLINSRHSTICTIPKNVAIYPAAAVTNQGLLKHCISSQRCLRSLVKPVSAASSGFEADLGDDESLIRVKNAKIAVESEDDEKIQVRVDVSEEDTKTVFEKVLTNLAKSAPPVPGFRREKGGKTSKVPKDFLLQILGEDRVTNFVIREIVTSTLADYVKKENLAVKDNKISTTQTADELKSSFVPGTEFRFNATLELEKSKTEAST	At2g30695	XP_004241291.1	10	79	9	3.87	0.0249558	5	3	8	35.2	not assigned.unknown	Cp	63	3	Cp	Cp	Cp	Cp	64.9	plastid stroma	plastid	-
	Solyc06g074900	TIG-like	Trigger factor-like (AHRD V1 *-*- B7KBH9_CYAP7); contains Interpro domain(s) IPR008881 Trigger factor, ribosome-binding, bacterial	MTMTMTTAMASPSRRLLIDSCYCIVSTIPKNVAIYPATAVTKKGLLKHCISLQGRLRSLVKPVSAASSGLEADSADECLKNAKIVVESEEAEKIQVRVDVNGEYTKMVFDSVLTKLAKSEQPIPGFRREKGGKTSQVPREFLPQILGEERVTNSVIREIINSTLAEYVKKENLAVKDNKISITQTADELMSSFAPGMEFGFNAILWLEKSKTEATT	At2g30695	XP_019070028.1	5	16	4	1.894	0.0122135	5	3	8	35.2	not assigned.unknown	-	-	3	-	possibly Cp	Cp	Cp	55.4	plastid stroma	plastid	-
Protein disulfide isomerase	Solyc09g091830	pTAC5	Protein disulfide isomerase pTAC5, chloroplastic [Solanum lycopersicum]	MASSLPLSFHIITSNLHSNNTYTPKFFSLKNSSASVSVSHVCYSGSPEREESRWLREEQRWLREEQRWLREERRWEAEREALLVQIRELELRVKEVESSRDSLLPEATSVTETVANIAKLLQLLKEGEVGKNVTVIAESGSIALPLVLEEAKQNEVIVKEEPQQEKVIREVPKELEGEGNKAKKRRSLKKGSEGDEVRLMQEQLLKLGFYCGEEDMEFSSFSSGTERAVKTWQASSDLREDGIMTSELLEKLYMVQNIERVKENPKQPDGTEAKTSANGAPITSIMEIEEVQQTIVKEDGVSETEVSHHRVFLLGENRWEEPSRLSSSKKPAETSSASTTIKCITCRGEGRVLCMECDGTGEPNIEEQFMEWIDEGMKCPYCEGHGFLTCDVCQGNKIM…	At4g13670	XP_004247853.1	1	1	1	0.129	0.000831859	1	0	1	27.2	RNA.transcription	Cp	37	1	Cp	Cp	Cp	N	88.2	plastid nucleoid	plastid	-
	Solyc01g108200	SCO2	Protein disulfide-isomerase SCO2 (SNOWY COTYLEDON)	MLPLINSCSIFTPLSSSLLPPRRSTVISCQAAADPSAAGGPSSFRWWFNFGAAASAAAAPGFGRNSQNSDEVADNGIGNNIKKKKTKVNAKERRWSRNRESYLADDGDALPLPMTYPDTSPCSPEEIDRRLQCDPIIEDCKQVVYEWTGKCRSCQGTGLVSYYNKKGKETICKCIPCAGIGYVQKITLRTDIDVMVDLDDKPP	At3g19220	XP_010315236.1	1	3	1	0.931	0.00600357	3	0	3	35.2	not assigned.unknown	Cp	28	2	Cp	Cp	Cp	Cp	94.6	thylakoid	-	-
	Solyc06g005940	PDIL1-1	PDIL-Protein disulfide isomerase-like IPR005792 Protein disulphide isomerase; similar to AtPDIL1-1	MAKSGILVIVSALVVLAVCGVFAEENEYVLTLDHSNLTETVAKHNFIVVEFYAPWCGHCKSLAPEYEKAASELSSHDPPIVLAKYDANDEANRELSKQYEIQGFPTIKILRDGGKKVQDYNGPREAAGIVSYLKKQVGPASAEIKSKEDATNLIDEKSIFVVGIFPDPSGEKFENYLTLAEKLRGEFDFAHTVDAKHLPRGGPVNKPTLRLLKPFDELFVDFEDFDVDAMEKFISESSIPVVTIFDNDPNNHPYVNKFFEGTKALLFVNFSSEFDAFKSKYNDVAVIYKGDGVSFLLGDVEAGQGAFEYFGLKPEQAPVIIIMDADEQKYIKDHVEPDAIAAYLKDYKEGKLKPHVKSEPIPEVNDEPVKVVVRDTLQDMVYKSGKNVLLEFYAPWCGH…	At1g21750	XP_004240392.1	16	67	16	8.085	0.0521363	5	3	8	21.1.1	redox.thioredoxin.PDIL	S	-	1	-	ER	Cp	ER	96.12	-	endoplasmic reticulum	plastid
	Solyc06g060290	PDIL1-1	PDIL-Protein disulfide isomerase IPR005792 Protein disulphide isomerase; similar to AtPDIL1-1	MAIRVWISLFLCVFALLGSESYASENEDTQSKEFVVTLDHSNFSDFVGRHKFIVVEFYAPWCGHCKKLVPEYEKAAEILSQNDPPVVLAKVDANEEQNKALASEFDIKGFPTLKILRYGGSVVQDYKGPREADGIVSYVKKQSGPASAEIKSSKDAEDFIDVNKIIIVGVFPEFSGEKFENFTAVAERLRADYDFGHTLDAKLLPRGDSSVSGPVVRLFKPFDELFVDFQVFDVDALAKLVEEATIPTVTVFNKDPNNHPFVVKFFNSPKAMLFVNFNIFDSFKSKYHEVAEQYKGNDISFLIGDVEASQGAFQYFGLKEDQTPLIIIQTNEGEKYLKTNVEPDHIASWVKEFKDGKVKPYKKSEPIPEVNNEPVKVVVADNFQDMVFNSGKNVLIEFY…	At1g21750	XP_004242032.1	15	46	14	4.754	0.0306563	5	1	6	21.1.1	redox.thioredoxin.PDIL	S	-	1	-	ER	Cp	ER	99.24	-	endoplasmic reticulum	plastid
	Solyc05g018700	PDIL1-2	Protein disulfide isomerase IPR013766 Thioredoxin domain	MMKFLVLAALLAVTAFAAENEVVWTLNADHTNYSQIISQHKMIVVQFYAPWCGYCQQLEPKYEEAASVLSNHDPPVILAKMDTTILEELARNFTINGVPSIKIFRNGGKTVHDYKGTRETEGIIAYLKKHGGPASLEIKTEKDAATFIDEKKIVVAGIFPQLSLEKIINFTTLAEDLRVDYDFVHTLDAKLLPRGGLVDKPTIRLLKPYDELYADFEDFQIEAMQNFIEETSVPIMAILDDNPENQQFVNHFLHSPGDKVFLFLNFSTDLDAFKIKYYDLALSYKGKETNFLLGDAESGKKALQYFGLDTDQTPLIFVLTMGSTKYVQRHVQPDNLASWLKDCKDGKLKPYLKSQPIPEFNNETVKVVVAETLEDMVFNSGKDVLLEFYRLGCRYCEEF…	At1g77510	XP_004239286.1	5	7	5	0.585	0.00377238	4	0	4	21.1.1	redox.thioredoxin.PDIL	S	-	3	-	ER	Cp	ER	92.06	-	endoplasmic reticulum	plastid
	Solyc05g056400	PDIL1-2	Protein disulfide isomerase IPR005792 Protein disulphide isomerase	MKMEWSGVLVVLCVVFSVCVAEEEKEYVLTLNADHTNFTDTITKYNFIVVEFYAPWCGHCKKLAPEYEKAASILSSHDPQIVLAKLDASDDASRELAIKYELQGFPTIKILRDGGKNVQEYKGPRDADGIVAYLKKQTGPASAEIKSKEDVASLIDEKKINVVGVFPELSGEKFDKFITLAEKLRADYAFAHTVDAKLLPRGEPVDKPTIRLLKPFDELFVDFEDFDVDAAEKFIAEATVPIVTIFDQEPENQVYVSKFFKTPKVLIFVNFSTEFDAFQSKYKDVAVSYKGDGLSFLLGDVEAGAGVFKYFGLEPEQAPVIIIMVNEGEKYISTHVQPDVLASWLKDYKDGKLKQFFKSEPIPEVNNEPVKVVVRDTLRDLVLNSGKNVLLEFYAPWCG…	At1g77510	XP_010321305.1	4	13	3	0.359	0.00231502	5	2	7	21.1.1	redox.thioredoxin.PDIL	S	-	1	-	ER	Cp	ER	95.43	-	endoplasmic reticulum	plastid
	Solyc04g049450	PDIL1-4	protein disulfide isomerase-like	MAMKKYLILSIFLLNLIFFRTAFSSVVEEEEDLSFLEEEDSDAHSDSNPYGDHHDFENYEDLEDDSSDHGEDSYEPPAVDEKDVAVLKEGNFSEFISKNKYVMVEFYAPWCGHCQALAPEYAAAATELKGENVMLAKVDATEEAELAQKYDVQGYPTVFFLIDGVHKTYNGERNKDAIISWIKKKTGPVLSNITTVEEAEQILKDEKKVVLGYLNDLVGDKSEELAAAAALEDDVNFYQTANPDVAKLFHIDSQAQRPALVIIKKEAENINHFDGEFTKSAIAKFVFENKLPLVTNFTRESASEIFENPITKQLILFATSKDSEKFLPIFQEAVKAFKGKLICVFVEIDNEDVGKPVSEYFGVSGDAPRVLAYTGNEDGRKFILEGEITLDGVKSFGEK…	AT3G54960	XP_004237540.1	12	29	12	2.433	0.0156892	5	2	7	18.12.1.4	'Protein modification.cysteine disulfide formation.endoplasmic reticulum.protein disulfide isomerase *(PDI-L)'	S	-	1	-	ER	not Cp	ER	90.04	plastid	endoplasmic reticulum	plastid
	Solyc12g099800	-	Rhodanese-like domain containing protein (AHRD V1 *--- B1XHS0_SYNP2); contains Interpro domain(s) IPR001763 Rhodanese-like	MLRISSSSSSLHVPSICGAPVSFILSFLNPSSRKVSNFTRLALLHSTTLFPNSRNFQFPTFRRVSTMMGRTHSCSRVVTASYSAASGPGGSSGGDREILVQHLLVKEDDQKLLLDLQKKTAEGEDLSDLAVEYSMCPSKEDGGMLGWVRKGQMVPEFEEAAFGAPLNKVVKCKTKFGWHLLQVLSEREESVLEHIQPNEFHVRLQDPSFLEEAQLIDVREPEEVAQASVPGFQILPLRQFGVWGPEITTKFDPQKDTYVLCHHGVRSLQVAKWLQTQGFRKVFNVAGGIHEYAVKVDPSIPTY	At5g19370	XP_004252885.1	11	38	11	5.952	0.0383816	5	3	8	26.23	misc.rhodanese	Cp	65	1	Cp	possibly M	Cp	Cp	96.5	plastid	plastid	-
A Proteins were identified by acetone preparations and/or the gel method. For emPAI and Mol% calculations, only the data from the acetone prepartions were used. Proteins identified solely by the gel method have data for the number of peptides, PSMs and unique peptides.
B Names of tomato proteins were based on the literature, NCBI annotation (identified in BlastP searches), and/or SolyGenomics descriptor. In a small number of cases, tomato protein names were assigned based on NCBI annotations and the Arabidopsis homolog.
C Some Sol Genomics descriptors were updated when NCBI annotations and Arabidopsis gene annotations were aligned.
D Target P's subcellular locations are: chloroplast (Cp), mitochondria (M), secretory (S), and no predicted location is indicated by a dash (-).
E ChloroP was used to predict the presence of a chloroplast transit peptide (Y) and the lack of a predicted transit peptide is indicated with a dash (-).
F Predotar's predicted subcellular locations were: chloroplast/plastid (Cp),endoplasmic reticulum (ER) or mitochondrion (M). For proteins with localization predictions that were less clear, Predotar provided categorized of possibly Cp, M and ER. Proteins with unresolved locations or that did not have a homolog detected by Predotar are indicated with a dash (-).
G WoLF PSORT's and YLoc's predicted subcellular locations were: chloroplast/plastid (Cp), cytosol (C), cytoskeleton (Cy), endoplasmic reticulum (ER), extracellular (EX), golgi apparatus (G), mitochondrion (M), nucleus (N), peroxisomes (P), plasma membrance (PM), and vacuole (V). Proteins with no chloroplast location in WoLF PSORT are indicated by not Cp.The number of proteins predicted to be in t…

## Sheet: Table S10D- modifications
Table S10D. Protein modifications
Gene and protein descriptors							ProteomicsA								Bin codes		Algorithms								Databases
Category	Tomato Gene ID	Gene nameB	DescriptionC	Protein Sequence	Arabidopis homolog	Tomato proteinB NCBI accession	Peptides	PSMs	Unique Peptides	emPAI	Mol%	Acetone samples	Gel samples	Total	Bincode	Name	TargetP D ver.1	Transit peptide length	TargetP (reliability class)	ChloroP E	Predotar F	WoLF PSORT G	YLoc G	YLoc % Confidence	PPDB	SUBA4	plprot
Protein kinases	Solyc08g074560	ABC1K1	ABC1-like protein kinase 1	MEGICTSCLYSSITPLSIEYRNRRKLLNTVRKNRSLSTRICAASSVSTVQTPSEKTALLVKDISRTSALEQLDIERGVCIPFRKYSPESVRNKVLESRGQIFSLVGRGIEIVWSLGLYWTTLVYDYLVGRDEEVVPFRARQLRKLLCDLGPSFIKAGQVLANRPDIIREDYMNELCILQDDVPAFPNQVAFNIIEEELGQPLEAVFSKISSETIAAASLGQVYRATLRASGEEVAIKVLRPQIEPIIYRDLFLFRTLASFLNGISLQKLGCELIVDEFGEKLLEELDYTLEARNIEDFLENFKDDPTVKIPRVYRQLSGSRVLVMEWIDGIRCTDPQAIRDEGIDIDGFLTVGVSAALRQLLEFGLFHGNDPHPGNIFAMRDGRIAYVDFGNVAVLSQQ…	At4g31390	NP_001305094.1	1	1	1	0.061	0.00039336	1	2	3	34.16	transport.ABC transporters and multidrug resistance systems	Cp	41	2	Cp	Cp	Cp	C	57.8	plastoglobules	plastid	-
	Solyc04g083010	ABC1K3	ABC1-like protein kinase 3	MSSSVASFTANHHVMLPSCADAVRLSGANSSGGRRVKLRLNLPRAAQVEARPQLVPAIRDVAGNSNVTGRTLQVGPSSRDRADDMQSEARAMTRAVDASVYSPDMLSSKYGTRPIKVLRRALQIFNGLGSFALKVWLDQLNGELDRKMRLRAIELRQTFTRLGPTFVKIGQGLSTRPDLCPPEYLEELSELQDALPTFPDAQAFSCIERELGRPLETIYSSISPSPIAAASLGQVYKAQLKYSGQVVAVKVQRPGIEEAIGLDFYLIRGVGILINKYVDIISSDIVALIDEFARRVYQELNYVQEGQNARRFKKLYADKEDVLVPDIFWDYTSGKVLTMEWVEGVKLNEQEAIERQGLKVLDLVNTGIQCSLRQLLEYGYFHANDPHPGNLLATPEGKL…	At1g79600	NP_001311447.1	2	3	2	0.16	0.00103176	3	0	3	34.16	transport.ABC transporters and multidrug resistance systems	Cp	44	2	-	possibly Cp	Cp	Cp	99.5	plastoglobules	plastid	-
	Solyc08g008170	CDPK19	Calcium dependent protein kinase 19 (AHRD V1 **** B9GKB5_POPTR); contains Interpro domain(s) IPR002290 Serine/threonine protein kinase	MGNCNSLSSDQATTTSGGGGGGGAPSTPSTTGIRIIPSSQPPPPRPLSGIGRVLGRPMEDVRSIYIFGGELGRGQFGVTYLVTNKKTRQQFACKSIATRKLINKDDVDDVRREVQIMHHLTGHRNIVELKGTFEDKHHVHLVMELCAGGELFDRIIAKGHYSERAAAGVCRQMVTVVHNCHSMGVMHRDLKPENFLFLSSDETSPLKATDFGLSVFFKPGDVFKDLVGSAYYVAPEVLRREYGPEADIWSAGVILYILLSGVPPFYGENDQSIFDAVLRGHLDFSSDPWPSVSSSAKDLVKKMLRSDPRERISAAEVLNHPWMREDGDASDKPLDIAVLSRMKQFRAMNKLKKVALKVIAENLSEEEIIGLKEMFKSIDTDDSGTITFEELKAGLTKMG…	At4g23650	XP_004244622.1 Hu et al (2016)	1	2	1	0.186	0.00119942	1	0	1	30.3	signalling.calcium	Cp	62	5	Cp	-	Cp	C	99.8	-	-	-
	Solyc02g084750	CDK5RAP1	CDK5RAP1-like protein	MASSLSSLSTMLSQPHCAVRIKFPKQYSVRFLSSKLLEVQSTSSrRNATSVSLGRSSTFSIKISRNFSQCHSRTSLTSKNQIPTLRDFIPKATQTVSSSDVQQESVMISDVMPRGRIYHETYGCQMNVNDMEIVLSIMKNAGYTESVEVPENAEIIFINTCAIRDNAELKVWQRLNYFWFLKRQWKSNVASGRSQSAHPPKVVVLGCMAERLKDKILDADKMVDVVCGPDAYRDLPRLLEEVDYGQKGINTLLSLEETYADINPVRISKNSISAFVSVMRGCNNMCSFCIVPFTRGRERSRPVESIVKEVAELWKEGVKEVTLLGQNVNSYNDTSGVENPDEPAVSWELSDGFSSMFKVKHVGLRFADLLDRLAIEFPEMRFRYTSPHPKDFPDDLLYV…	At4g36390	XP_004232445.1	1	1	1	0.07	0.000451396	1	0	1	15.2	metal handling.binding, chelation and storage	Cp	95	1	Cp	Cp	Cp	Cp	88.3	plastid	plastid	-
	Solyc03g097130	-	ATP-binding protein (AHRD V1 ***- D7M885_ARALY); contains Interpro domain(s) IPR000719 Protein kinase, core	MVVGGAVADCLSKCGSSFAARSSSSSFCGIGLRLNLNSNINRTIRPRQAFVGLCVASLITDSDSFEVGRLIGSYGFMNVTSYSGLQSGMAMDYAVSEDIGNFKVQDIGEGSVKIRLYEGRVAQGPLRGTRVIFKVYPGQQVGGTEADMMAANELNAHASLQSNPKDICPHIQALLGGFETKTGEQWLAFRDIGKYSAADYAKITSENMSKMIGGGEQRLWNPFELDLTIKRRRYFVVRLLHGTMRGLSYMHDNDRLHQSLGPASVVLNTVVEKDAAYLIPRLRDLAFSVDVRYSQLEDRPNILSEGLWRRASVAGASSPLERRAFGIADDIYEAGLLFAYLAFVPFCEAGVMDSISLRRLLENTFQLDLQAAREYCSADDRLLEAVKFLDLGDGAGWEL…	At5g16810	XP_004235297.1	7	20	7	1.462	0.00942773	5	3	8	35.2	not assigned.unknown	Cp	55	2	Cp	Cp	Cp	Cp	98.5	-	-	-
	Solyc01g091780	-	Ribulosamine 3-kinase	MAVALLGSISFSSSMPSISSPSLQHPFNFNKHKPLIVAAMSDDPVREWILSEGKATKIKGISPIGGGCINRATRYDTDAGSFFVKTNRSIGPSMFEGEALSLNAMYETGSIRVPKPYKVGSLPTGGSYIIMEFIEFGASRGNQSALGRKLAEMHKAAKSEKGFGFHVDNTIGSTPQINTWMSDWVEFFAEHRLGYQLKMAREQYGDPIIYERGQRLARNLGPLFKNVVIEPCLLHGDLWSGNMTYDKNGEPVILDPACYYGHNEAEFGMSWCAGFGGDFYKAYFEVMPEQPGFEERRDLYMLYHYLNHYNLFGSGYRSSAMSIIDDYLRMLNV	At3g61080	XP_004229852.1	4	12	4	1.154	0.00744159	5	3	8	35.1	not assigned.no ontology	Cp	37	3	Cp	Cp	Cp	Cp	99	plastid stroma	plastid	-
	Solyc04g072230	-	Uncharacterized aarF domain-containing protein kinase 1 (AHRD V1 *--- ADCK1_XENLA); contains Interpro domain(s) IPR004147 ABC-1	MLVVPPQPLPLFAANSLSDGSFRCLFRRSKVNSSSSRVALPVAAVAREVDDFTKYSGYVFELNPSEEDSLTEYNIAKIAAFYQKKPLIVLRRLVQIGSTLGKWFAVRYLDTVNERADEMFKIRAAELRKILLQLGPAYVKIAQAISSRPDLIPPSYLDELSLLQDRITPFSSEVAFEMIEKELGMPIDVMFSEISPEPVAAASLGQVYQARLRSTREVVAVKVQRPGVQSAISLDILILRYLAGLIKKAGKLNTDLQAVVDEWASSLFREMDYKQEARNGVKFRQLYGSIQDVVVPEMNLALTTRKVLIMQWLEGQKLAGVKDLYLVEVGVYCSFNQLLEYGFYHADPHPGNLLRTYDGKLAYLDFGMMGEFKQEYRDGFIEACLHLVNRDYSALAKDF…	At1g71810	XP_004237848.1	3	4	3	0.166	0.00107045	3	1	4	35.1.1	not assigned.no ontology.ABC1 family protein	Cp	42	3	Cp	-	Cp	Cp	61.7	plastoglobules	plastid	-
	Solyc09g091580	-	Uncharacterized aarF domain-containing protein kinase 1 (AHRD V1 *--- ADCK1_CHICK); contains Interpro domain(s) IPR004147 ABC-1	MDAAAAQLVYCGIDPLCRSSLPYRGLSSSSSSSSLKKLRIRRKNGIVRAIATEPKPSESKATGIPKPVNGSSTRIQDVSQEIKRVRAQMEENEDLAILMRGLRGQNLRDSLFADDNIKLRLVEVDESSEFLPLVYDPASISAYWGKRPRAVATRIVQLTSVAGGFLSRLAWDLINKKVKENEVARAIELREIVTSLGPAYIKLGQALSIRPDILSPAAMVELQKLCDKVPSFPDDVAMALIEEELGEPWSNIYSELSPSPIAAASLGQVYKGRLKENGDLVAVKVQRPFVLETVTVDLFIIRNLGLVLRKFPQISIDVVGLVDEWAARFFEELDYVNEGENGTVFAEMMKKDLPQVVVPKTYSKYTSRKVLTTGWIDGEKLSQSTASDVGDLVNVGVIC…	At3g24190	XP_004247833.1	8	19	8	0.874	0.00563601	5	3	8	35.1.1	not assigned.no ontology.ABC1 family protein	Cp	48	1	Cp	-	not Cp	Cp	75.8	plastoglobules	plastid	-
	Solyc03g095620	-	aarF domain-containing protein kinase	MAVVTVLRGVSHGRLPLLTHSQFPIVTPTNIAYRNRPNVLRVFARYSQTQDLFTSRLQDRLENLPKLVEDIVQTSLSTGPRGALRLAQGVQAVVGVGSEWLQDVSKTANSSTGLPTQLQLGLLSPLYLRKLFERMGATYIKLGQFIASAPTLFPPEYVQEFQYCFDRAPAVPFEQIQTILREELGRPIDTVFEYIDPTPVASASIAQVHGARIRGTGEDVVIKVLKPGIEDILVADLNFIYIAARILEFLSPDLSRASLVAIVKDIRESMLEEVDFNKEATNVESFRNYLEAMGLTRQATAPKVYRQYSTKRILTMERLYGVPLTDLDSIKSLVSSPETSLITALNVWFGSLLACESFHADVHAGNLWQLRDGRIGFLDFGIVGRISPKTWAAMEVFLQ…	At5g05200	NP_001311229.1	7	17	7	1.219	0.00786074	5	2	7	35.2	not assigned.unknown	M	46	3	Cp	possibly M	Cp	M	90.7	plastoglobules	plastid	-
Protein phosphatases	Solyc06g082080	PP2C25	Probabale PP2C 25; Integrin-linked kinase-associated serine/threonine phosphatase 2C (AHRD V1 **** ILKAP_BOVIN); contains Interpro domain(s) IPR015655 Protein phosphatase 2C	MSCTVALSNSPVFSPSRVPVPASLRCKVSSSSSSSSPETLNLTHSPSKTSSSPSSPSSPLRILRLQKPPPSNLIRASNTDCSTSTVLKRKRPTRLDLPVASMSFGNFPVTPAGVADLVEVEGDGYSVCCKRGRKGAMEDRHSAMVNLKGDSKQGFFGIFDGHGGVKAAEFSAENLNKNIMNELGKTTDDKIEVAVKNGYLKTDTEFLSQEVRGGSCCVTALIQKGNLVVSNAGDCRAVVSRGGLAEALTSNADHRPSRKDEKDRIEASGGYVDCCHGVWRIQGSLAVSRGIGDQYLKQWVTAEPETKILELNPELEFLVLASDGLWDTVSNQEAVDIARPLCTGISTQQPLSACRKLIDLSVSRGSLDDISVLIIQLGRFC	At1g07160	XP_004242517.1	1	1	1	0.116	0.000748028	1	0	1	29.4	protein.postranslational modification	Cp	99	1	Cp	Cp	Cp	Cp	35.2	plastid	plastid	-
	Solyc06g007350	PBCP PP2C26	Photosystem II core phosphatase; Phosphatase PTC7 homolog (AHRD V1 **** C1BT38_9MAXI); contains Interpro domain(s) IPR001932 Protein phosphatase 2C-related	MAISILRPSISLPQHFLNSMNPQKFSSISVIRKKQSFLHCVASDSAPSPARQEMSLSVGMYLIPHPNKVEKGGEDAFFVSSDNGGVIVVADGVSGWAEKNVDPALFSRELVANVSSLVGNVEVNDDPRILIKGAHAATSSIGSATVIVSVFENGILKIASVGDCGLRVIRKGQMIFSTFPLEHYFDCPYQLSSEAVSQTYLDAIVSTVNLQVGDTIIMGSDGLFDNIFDQEIVSVVTTNDDVSNAAKALADLARNHSVDTKFDSPFSLEARARGFDVPWWKKVFGMKLTGGKLDDITVIVGKVKNT	At2g30170	XP_004240420.1	1	3	1	0.259	0.00167017	3	1	4	35.2	not assigned.unknown	Cp	41	2	Cp	Cp	Cp	Cp	44.2	plastid stroma	plastid	-
	Solyc03g082960	PPH1 TAP38 PP2C57	Thylakoid associated phosphatase; Serine/threonine phosphatase family protein (AHRD V1 **** C1E0J1_9CHLO); contains Interpro domain(s) IPR015655 Protein phosphatase 2C	MALSSPHLQKVLLNKICSYKITSKKSIIQKPLGGGGGGGGEGRGRCSSAIAIDAPAPFTSVSGIRWGSTMVQGPREEMEDDAVIVQSDDLDGFTYAAVFDGHAGFSSVKFLREELYKECVLALQGGPLLNRKDLNAIRKALQEAFENADRELLNRLESSEKEDESGATATALFVGNDTLIIAHVGDSSVVLSRSGKTEILTNSHRPYGNNKVSLQEIRRINEAGGWIVNGRICNDISVSRAFGDMRFKTKKKEMLEKGVKERRWSEKFISRIQFRGDLVIASPDVLQVNLGSDAEFVLLASDGLWDYMKSDEIVDFVRNQLREHGDVQIACEALARLALDRRTQDNVSIVIADLGRTDWRNLPVKKQNVVLELGQALVTISFVSIGIWLSTMISP	At4g27800	XP_004234983.1	3	7	3	0.778	0.00501695	4	3	7	29.4	protein.postranslational modification	Cp	61	5	-	possibly Cp	not Cp	M	99.9	thylakoid-peripheral-stromal-side	plastid	-
	Solyc06g082280	SLP1	Shewenella-ilke protein phosphatase 1; Serine-threonine protein phosphatase (AHRD V1 **-* Q5CPY7_CRYPV); contains Interpro domain(s) IPR004843 Metallophosphoesterase	MATLSLTCSLPLQPPSSSSSQSQSRKLIDSIVSTPFQYSSSSTTSSNGSLKPIVVDGDPPTFVSAPGrRNAIVAVGDLHGDLDKARCALETAGVLSSDGQSLWIGGETVLVQLGDILDRGEDELAILSLLKSLDIQAKAHGGAVFQVNGNHETMNVEGDYRYVDNGALDECIDFLEYLDKCERNWEEAFVSWCAVSARWKQDRKVSQNYWAQWNLVKRQKGVIARSILMRPGGPLACELARHGVVLKVEDWLFCHGGLLPHHVAYGLERLNREVSRWMKGPSEEDDSPQIPFIATRGYDSVVWNRLYSRDGVELENYQLEQVQYLLEETLQSVGAKAMVVGHTPQPMGVNCKYNCSIWRIDVGMSRGVLDSSPEVLEIRDNKARAIRSTRDWSSELQVA…	At1g07010	XP_004242499.1	1	2	1	0.179	0.00115428	2	0	2	26.27	misc.calcineurin-like phosphoesterase family protein	Cp	40	1	Cp	Cp	Cp	Cp	88.3	plastid	-	-
	Solyc01g105020	PP2C62	Phosphatase PTC7 homolog (AHRD V1 *-*- C1BT38_9MAXI); contains Interpro domain(s) IPR001932 Protein phosphatase 2C-related	MADSLCKFLDGRCITGSQFFATYFSAQKPFLFPTLVRRKRRRKSLHIAFCSTPISTNLDVVSTHEHSDGTLLFRFGDPREIAKEDELEEPLLDSEEEFSVVKVLDGDNEREVIVKKVEREARGEAVTVVTDAGVSESVVignaNGRNDLVEVETGLSKNFLGDSAVEIGSFSPEGIQNESVAEVDIENAVHVEEIFEKKDDSEASVPPPPENSITSLEVEEEMMGQTSDESFEELDDDKSLVLSSPTAMPVYSDLVNTKEIEEFEGEGSSQLTENDGDKDCCYDSTHSKENGAASADIEAAHNDIEIVQQIEQISENIGSILEGSTESVPEGINLGNAKTVADEISPENAPEGINLGNTETVGDEISPDNAPEGINLGNTEAVVDEISSDNAPEGIDKG…	At4g33500	XP_004230532.1	7	18	7	2.162	0.0139417	5	2	7	29.4	protein.postranslational modification	Cp	61	5	Cp	-	Cp	C	71.8	stroma	plastid	plastid
	Solyc11g067060	-	Low molecular weight protein-tyrosine-phosphatase slr0328 (AHRD V1 ***- B6TIW5_MAIZE); contains Interpro domain(s) IPR000106 Protein-tyrosine phosphatase/arsete reductase	MRSLLFSTVTILAPSKLPNCHHSHYAAPHSLKFPFLTSLLPTKSPFLLKESYKSVKIKALMESGMDSSTKPFSVLFVCLGNICRSPAAEGVFTDLVKKRGLDSKFKIDSAGTINYHEGNEADPRMRAAAKRRGIAITSISRPIRASDFKDFDLILAMDEQNKSDILGALERWIHREPLPADAAEKVRLMCSYCKKHQETEVPDPYYGGAQGFEKVLDMLEDACDSLLESIVTEQNLGS	At3g44620	XP_019066564.1	6	32	6	5.579	0.0359763	5	3	8	29.4	protein.postranslational modification	Cp	58	5	Cp	possibly M	Cp	Cp	98.9	plastid stroma	plastid	-
	Solyc03g059180	-	Rhodanese/Cell cycle control phosphatase superfamily protein (TAIR)	MATLPVCSATACSSSHSQIPFYGGLRSFSSCWKTYQLKCNVVDLSTSFHLNGPSFRGQSPIFLYSQFVQNSSLSSSSDSICTSCQNVIYSVNRELLTSDARSNSTGNLKFVDSSAVPVGREEMMGFNDDLVNIANFSPESANLESITTVDLTQGNPASILDSMDLETSSLSNVKSSALDVLSQVNKSITGSVENGQSYLNSSLDGISSSVTSAVRGATQAVDDVISKLTSTVDKTGDSAGNGVAAFSTGLKEVSGRVGLLAIDGLRHIILIFEDLVSRGATLVVFSYGSVKEVLPMEVQDLLNVSEERAVKLLTPFGTALGQGYVALEGLERSLGLDPSDPIIPFILFLGVSTAFWAFYWKLTYGGYAGDLSPKSSFELLKGDRKAVLIDIRPEDLREK…	At3g59780	XP_010317888.1	1	1	1	0.116	0.000748028	1	0	1	35.2	not assigned.unknown	Cp	38	4	Cp	Cp	Cp	Cp	73.8	thylakoid	plastid	-
Protein methylases	Solyc07g062930	PRMA-like	Ribosomal protein L11 methyltransferase-like protein (AHRD V1 **** Q9FN34_ARATH); contains Interpro domain(s) IPR010456 Ribosomal L11 methyltransferase	MTMVLNSLRGHFFKNLSCTTSSIITGRFFNGrRNAVHRLIPFIHLSKSCAAQRYKHWKRIQTAAKFSTLSSPSSETPASDSFTSPYLSVRICCQKDVADMLSEALLCFGASSTTVDEEERSDEIIITSIFSVCKDVKDCISLAADsignalQKIPSFEVTMHNADHTDWIKATQELFCPVEVTDGLWVVPEWTTPPDPQATNIILNPGLAFGTGEHPTTKLCLLLLRDLIKGGEFFLDYGTGSGVLAIAALKFGAAFSVGFDIDPQAITSAQYNATLNNIGHEELLLKLVPGKGILPSADFSSSMDIDQTAYDAEVLNNRGKYDIVVANILLNPLLELADEIVSYAKPGATVALSGIISEQIPRILERYSQYLENITVTKMDDWACISGLKK	At5g53920	NP_001315978.1	1	2	1	0.233	0.0015025	2	0	2	29.2.2	protein.synthesis.ribosome biogenesis	Cp	59	5	Cp	Cp	Cp	Cp	50.7	-	-	-
	Solyc02g049070	-	rRNA small subunit methyltransferase J [At5g08540]	MAASACTVLNFSHPHVASTSQYIPTLSTPINRTLSFPRHRSNTFVVTVGFSTRAAKSDSGANVSSDKKKEVLEDEEEEEMPWIQEKALDLVEFTGSVTQAIPGPRIGSSSFPWILTVPLTYFGITFVIAFVKTARKFNSPREKRKKLVNKNAELCKSIDELFEKGKDFVEPSTLKGLAQKTGFDMEEIFRKYIRYSLNEKPFSPDLVAYLIQLRKASMLTDSEVAGILNEISRRIVQDKGPVVMDISGYSEKGLKRKLAVQTLFGKIYYLSELPEFCSRDSSLTVKEIFGVADEDAEKLRLHTIPEAGNMDSLERMVNGSDSE	At5g08540	XP_004231721.1	2	4	2	0.334	0.00215381	3	0	3	35.2	not assigned.unknown	Cp	64	1	Cp	Cp	Cp	Cp	99.3	envelope-inner	plastid	-
	Solyc01g005380	-	SET domain containing protein (AHRD V1 ***- B6U0H4_MAIZE); contains Interpro domain(s) IPR001214 SET	MSSKMMLMANSLTHVRPLTCAAAAVYPSRLVAQPPDLIKWVKTEGGFVHKSIKVAQGDTFGLGLVASEDIPKGSDLIALPQHIPLKFDGSTSESENSHSALIKLAQHVPEELWAMKLGLKLLQERARKGSFWWPYISNLPETYSVPIFFPGEDIKNLQYAPLLYQVNKRCRFLLDFEKILKHELENLKPDNADHPFSGQDVDSSALGWAMSAVSSRAFRLYGGKRPDGTRSNVPMMLPLIDMCNHSFDPNAEIVQEEANTNRNMLVKMVAGREIKQNDPLLLNYGCLSSDLFLLDYGFVIPSNPYDCIELKYDAALLDAASMAAGFTSPNFSSPSPWQQQILSHLNLDGPNSDLKVTLGGGELVEGRLLAALRVVLSNDEEAVKQHDLETLKSLTVEAP…	At1g24610	XP_004228642.1	11	33	11	5.661	0.0365051	5	3	8	35.1.13	not assigned.no ontology.SET domain-containing protein	S	-	5	-	possibly Cp	Cp	M	69.4	-	-	-
	Solyc05g013150	LSMT	Set domain protein (AHRD V1 ***- C1EFC8_9CHLO); contains Interpro domain(s) IPR011192 Rubisco methyltransferase	MASVFSSSFFCPLKTTKLRIKLQTLQSSQKPFLISSLQLRELDPKIPQPVQTFWKWLCDEGVVSIKTPVKPGIVAEGLGLVAKRDISKGETVLGVPKRFWINTDAVAESEIGNVCTGLEPWISLALFLLREKWKDDSKWKYYMAVLPESTDSTIYWSEEELSEIQGTQLLSTTLSVKEYVQDEFQKVEEQVILGNKQLFPFPITLDDFFWAFGMLRSRAFSRGGIQNLMLVPFADLANHSVKVTTENADHIHEVGGPAGLFSWDLLFSFQSPLRLKAGDQFLIQYGLKKSNADMAIGYGFIEPNSARDAFTLTLEISKTDDFYGDKLDIAESNGLGETAEFDIKLGQSLPPPLFPYLRLVSLGGTDNFLLESITGNAVWNLLELPVSRANEELICKVVR…	At1g14030	XP_004239106.1	1	4	1	0.129	0.000831859	3	0	3	1.3.13	PS.calvin cycle.rubisco interacting	Cp	21	5	Cp	Cp	Cp	Cp	94.9	plastid stroma	plastid	plastid
	Solyc05g013160	LSMT	Set domain protein (AHRD V1 ***- C1EFC8_9CHLO); contains Interpro domain(s) IPR011192 Rubisco methyltransferase	MASVFSLPSSSFLCPLKTTRFRTKIQSLHSSPKSLLINSLQLQELDPNIPEPVQTFWKWLCEEGVVSAKTPVKPGIVPEGLGLVAKRDIAKGETVLEVPrRNAFWINPDAVADTEIGNVCTGLKPWISVALFLLREKWRDDSKWKYYMAVLPESTDSTIYWSEEELSEIQGTQLLSTTLSVKDYVQNEFRKVEEEVILPNKQLFPFPITLDDFFWAFGMLRSRAFSRLRNQNLILVPFADLTNHNARVTTENADHAHEVRGPAGLFSWDLLFSLRSPLKLKAGDQLFIQYDLNKSNADMALDYGFIEPSTSARDAFTLTLEISESDDFYEDKLDIAESNGLGGTAYFDIKLGQSLPPFLIPYLRLVALSGTDAFLLESIFRNAVWGHLELPVSRANEEL…	At1g14030	XP_004239106.1	14	71	14	6.197	0.0399615	5	3	8	1.3.13	PS.calvin cycle.rubisco interacting	Cp	26	2	Cp	Cp	Cp	Cp	99.4	plastid stroma	plastid	plastid
	Solyc02g068050	SAFE1	Safeguard1, RbcL methyltransferase family protein	MDLVYSSMAKCISAPFPSFTHRPLALFSRVSISPKYANArRNALWKMCSASSSDTLVDNGPVKEGSKSLEVASKKEGEYGDLKSWMHENGLPPCKVVIKDRPSHDAKHLPIHYVAASEDLQAGDIAFAVPDSLVVTLERVLGNETIAELLTTNKLSELACLALYLMYEKKQGKKSFWYPYIRELDRQRARGQLAVESPLLWSDAELDYLTGSPTKADVLERAEGIKREYNELDTVWFMAGSLFQQYPYEIPTEAFPFEIFKQAFVAVQSCVVHLQKVSLArRNAFALVPLGPPLLSYCSNCKAMLAAVDGAVQLVVDRSYSAGDPIVVWCGPQPNSKLLINYGFVDEENSHDRLMVEAALNTEDPQYQDKRLAAQRNGKLSVQAFQVCVGKEREAVLEM…	At5g14260	XP_010317061.1 Wang et al (2020)	5	21	5	1.783	0.0114977	5	2	7	27.3.69	RNA.regulation of transcription	Cp	45	3	Cp	Cp	Cp	Cp	98.5	plastid stroma	plastid	-
	Solyc10g005540	-	SAM-dependent methyltransferase (AHRD V1 ***- D2ELV5_PEDAC); contains Interpro domain(s) IPR010719 Putative rRNA methylase	MVQCEWNLKFSISPLLFSSKKSTISIAAFASSSELNGASISVAGAESSSSIPFFRDSPISGSMEQVMVEYVFGRKKATEVAHYVWKHIVQKGDAVVDATCGNGYDTLALLKLVADKTRRGRVYGMDVQKIALESTSSLLDQFASPDEKELVELFVMSHSQMEDIVPNDVAVRLVAFNLGYLPGGDKKIITRSETTVLALEAAKRILAPGGLISIVTYVGHPGGREEFEKIEEFASGLPVEAWNCCKLHTLNRPLAPMLLFLFKR	At1g16445	XP_004248341.1	2	3	2	0.668	0.00430761	3	0	3	35.1	not assigned.no ontology	Cp	60	4	Cp	possibly Cp	Cp	EX	61.9	-	plastid	-
	Solyc07g045310	-	RbcL methyltransferase family protein	MAEVTKILQPVLLPPFFHKLDGTTNSHFRLCRRNRRNISIRCSSISTTETNKSTKTQNIPWGCETDSIENASNLQKWLTESGLPAQKLDLQRVNVGERGLVANNNIRKGERLLFVPPSLVITADSKWSNSDAGDVLKQYNVPDWPFIATYLISEASLMKSSRWSNYISALPRQPYSLLYWTQSELDRYLEASQIRQRAVERINNVignaTYNDLRLRIFSKHPDLFPEEIFNIETFNWSFGILFSRLVRLPSMDGRVALVPWADMLNHNCEVETFLDYDKSSQGIVFTTDRAYLPGEQVFISYGRKSNGELLLSYGFVPKEGTNPSDSVEVSLALKKSDKCYKEKVEALKKHGLSASECFPVQVTGWPLELMAFAYLVVSPPSMSRQFEEMAAAASNKA…	At3g07670	XP_004243586.1	5	13	5	0.65	0.00419154	5	2	7	27.3.69	RNA.regulation of transcription	M	42	5	Cp	-	Cp	N	62.5	-	plastid	-
	Solyc10g012410	-	Ribosomal RNA small subunit methyltransferase G	MGDLYALDFDGVLCDSCGESSLSALKAAKVRWPSLFNGVDSSLEDWIVDQMHVVRPVVETGYENLLLVRLLLESIIPSIRKSSVAEGLTVEGILENWSKIKPIIMAEWNEDRDFLIDLFGKVRDEWMDNDLATWIGANRFYPGVPDALKFASSKLYIVTTKQSRFADALLKGIAGITIPAERIYGLGTGPKVKVLKQLQEMPEHQGLKLHFVEDRLATLKNVIKESELDGWNLYLGDWGYNTQKEREEAAGISRIRVLELSDFSNKLK	At2g45990	XP_004248047.1	8	37	8	6.197	0.0399615	5	3	8	35.2	not assigned.unknown	-	-	3	-	-	Cp	C	92.85	plastid stroma	plastid	plastid
	Solyc07g066280	-	HemK protein methyltransferase (IC) (AHRD V1 **** Q01EX0_OSTTA); contains Interpro domain(s) IPR004556 Modification methylase HemK [PREDICTED: release factor glutamine methyltransferase [Solanum pennellii], e-value 0.0] // RNA methyltransferase family protein [Arabidopsis thaliana]	MRLTKLSERRLRPACVSKKMKLSFIRPISCCSVSSPATSVKPQKPIFLRPPTFKTTISDLQKWHHWAKSLISSVGSTFLELDNGPDSELLLRELNWLVEDAIETPKSFLQQPHKNYNDNSSVAVRASLEQLYMLWKRRVEERMPFQYVVGCEHWRDLVLSVQEGVLIPRPETELIVDLVDDAIKENGELREGLWADLGTGSGALAIGIARILGTSGRVVATDLSPVATAVASYNVQRYDLEEKVHVKQGSWFEPLRDNEGEFVGLVSNPPYIPSKDIGGLQAEVGRHEPRLALDGGASGMNDLIHLCDGAVSMLRPGGFFAFETNGDEQSKFLVHYIETKKQGNFSKVKMVSDFAGIKRFITGFRGR	At5g64150	XP_004243997.1	2	6	2	0.292	0.00188297	3	0	3	35.1	not assigned.no ontology	M	77	5	Cp	possibly M	Cp	C	96.8	-	-	-
Peptide methionine sulfoxide reductases & deformylases	Solyc06g034020	MSRA3	Peptide methionine sulfoxide reductase msrA (AHRD V1 **** D2B4D8_STRRD); contains Interpro domain(s) IPR002569 Methionine sulphoxide reductase A	MLILKITTITNPSLLHPFIKILPISQKMNSPRMNSWLNKFGFGARTESSIDSSSSEIPQGPNADHEVPDPGQQFAQFGAGCFWGVELAYQRVAGVTKTEAGYSQGFVHNPRYEDVCSGTSNHSEVVRVQYDPNECSYESLLDVFWARHDPTTLNRQGNDVGTQYRSGIYFYTPEQEKAALESQDKQQKILNRKIVTEILPAKKFYRAEENADHQQYLAKGGRFGSKQSAGKGCSDPIRCYG	At4g25130	NP_001307299.1	4	7	1	0.931	0.00600357	1	0	1	29.4	protein.postranslational modification	Cp	25	5	Cp	-	Cp	M	99.4	plastid stroma	plastid	-
	Solyc03g093690	MSRA4	Peptide methionine sulfoxide reductase msrA (AHRD V1 **** D2B4D8_STrRNAD); contains Interpro domain(s) IPR002569 Methionine sulphoxide reductase A	MLLKTCLPSSTIATKSPLISFSKSTLLLPPFSRKVSSTFPRTSKTPSLYSPPKMSWLNKLGFGARTDTPMDSSSSAIPQGPDTDIPAPGQQFVQFGAGCFWGVELAFQRVPGVTKTEVGYSQGYLDNPTYEDICSGNTFHSEVVRVQYDPKECNFDTLLDVFWDRHDPTTLNRQGNDVGTQYRSGIYFYTPEQEKAALEARDRQQKILNRNIVTEILPAKKFYRAEEYHQQYLAKGGRFGFRQSVEKGCNDPIRCYG	At4g25130	NP_001307972.1	7	31	4	2.384	0.0153733	5	3	8	29.4	protein.postranslational modification	Cp	73	1	Cp	Cp	Cp	Cp	52.7	plastid stroma	plastid	-
	Solyc07g062060	MSRB1	Peptide methionine sulfoxide reductase msrB IPR002579 Methionine sulphoxide reductase B	MGSSASSSKSDSVQGGSKMDYSSISDEEWKKKLTNEQFYITRQKGTERAFTGEYWNSKTPGTYHCICCDTPLFESSTKFDSGTGWPSYYQPIDNNVKSKMDLSIIFMPRQEVLCAACDAHLGHVFDDGPPPTGKRYCINSASLKLKAK	At1g53670	XP_004244304.2	7	43	7	50.795	0.327552	5	3	8	29.4	protein.postranslational modification	-	-	4	-	-	Cp	C	46.84	plastid stroma	plastid	-
	Solyc10g047930	MSRB5	Peptide methionine sulfoxide reductase msrB (AHRD V1 **** B6T2C6_MAIZE); contains Interpro domain(s) IPR002579 Methionine sulphoxide reductase B	MGSHILKISPFASSTPLFINATPFLRFQAKKVVSICGHPKTQFRFSSSSSSSSKRGFRGGVVAMAAPDSVHKSEEDWRAILSPEQFRILRQKGTEYPGTGEYDKFSGEGVYQCAGCSTPLYKSTAKFNSGCGWPAFFEGLPGAINRTPDPDGRRVEITCAACGGHLGHVFKGEGFPTPTDERHCVNSVSLKFTPANS	At4g21860	XP_004248788.1	5	23	5	1.424	0.00918269	5	3	8	29.4	protein.postranslational modification	Cp	62	1	Cp	Cp	Cp	C	84.8	plastid stroma	plastid	plastid
	Solyc07g015860	PDF1A	Peptide deformylase (AHRD V1 **** B9GKW9_POPTR); contains Interpro domain(s) IPR000181 Formylmethionine deformylase	MMERFPRLAQRVLSVPFTPKYLKSCKKTNPLTSHLMQLRGSQRPIFIQWNLQGRPSVCTDLISKKNYSSATARAGWFLGLGEKKKQAMPDIVKAGDPVLHEPSQDIPLEEIGSERIQKIIEEMVKVMRNAPGVGLAAPQIGIPLKIIVLEDTNEYISYAPKDETKAQDRRPFGLLVIINPKLKKKGNKTALFFEGCLSVDGFRAVVERHLEVEVTGLDRNGKAIKVDASGWQARILQHEYNADHLDGTLYVDKMAPRTFRTVENLDLPLAAGCPKLGVC	At1g15390	NP_001234703.1 Giglione et al (2000)	7	22	7	3.924	0.025304	5	3	8	26.1	misc.misc2	M	67	3	Cp	M	Cp	M	98.6	plastid mitochondria	mitochondrion	-
	Solyc02g086680	PDF1B	Peptide deformylase 1B (AHRD V1 **** Q5VNP3_ORYSJ); contains Interpro domain(s) IPR000181 Formylmethionine deformylase	MAMAAASWASSSSFTRFLRPLLSRNSSPSPISYSLHRYKSANCLFFSASSNKPPKLAVYAQArRNAVLSSKTKGDEIATPADLSFVVPLKIVEYPDPILRAKNKRIDNFDANLKKLVDEMFDIMYKTDGIGLSAPQVGMNVQLMVFNAAGERGEGEEIVLVNPRVSRYSrRNAIIPYEEGCLSFPMIHGDVKRPESVKVDAQDINGTRFEISLSALPARVFQHEFNADHLQGVLFFDKMTDEVLDTIREKLVALEKKYEDRTGLPTPESINTRKIKKAAVGFGKS	At5g14660	NP_001234441.1 Giglione et al (2000)	5	9	5	0.968	0.00624217	5	2	7	26.1	misc.misc2	Cp	59	3	Cp	Cp	Cp	Cp	99.2	plastid stroma mitochondria	plastid	-
Acetylases	Solyc10g074910	NSI	Acetyltransferase NSI (AHRD V1 *-*- Q31BX2_PROM9); contains Interpro domain(s) IPR000182 GCN5-related N-acetyltransferase	MQTLHLVSTSTVASSSSSSSLPTIVSLNCCRCQPSNQLPFPNSNLGFLKVKRQPKVSNLKASFWDSIRSGFGKNNIIQVIDTPSSEEEEEEPLPEEFVLVEKTQPDGTVEQIIFSSGGDVDVYDLQDLCDKVGWPrRNAPLSKLAAALKNSYIVATLHSRKFSSGEEGSGEKKLIGMARATSNADHAFNATIWDVLVDPSYQGQGLGKVLIEKLIRTLLQRDIGNISLFADSKVVEFYRNLGFEPDPEGIKGMFWYPMY	At1g32070	XP_004249035.1	3	9	3	1.154	0.00744159	5	3	8	26.24	misc.GCN5-related N-acetyltransferase	Cp	31	1	Cp	Cp	Cp	Cp	99.1	stroma	plastid	-
	Solyc05g010250	SNAT2	Serotonin Acetyltransferase-like protein (AHRD V1 ***- Q31BX2_PROM9); contains Interpro domain(s) IPR000182 GCN5-related N-acetyltransferase	MLLHFNPISTPFTLKPTVHHRNLTVFSQIQPIPIPFTTTNLSISDESLRSKGFNLHSTITDLNLNADHLNSVFVAVGFPRRDTEKIQIALENTDSLLWIQYEKTKRPVAFARATGDGVFNAIIWDVVVDPNFQGIGLGKAVMERLVTKLLRKGITNIALYSEPRVLGFYRPLGFVADPDGIRGMVYSRRKNKK	At1g26220	XP_004238988.1	2	5	2	2.162	0.0139417	4	2	6	26.24	misc.GCN5-related N-acetyltransferase	Cp	44	5	Cp	possibly Cp	Cp	Cp	91.5	plastid	plastid	-
	Solyc07g006340	GNAT	GCN5-related N-acetyltransferase-like (AHRD V1 ***- Q84S80_ORYSJ); contains Interpro domain(s) IPR000182 GCN5-related N-acetyltransferase	MAILFTPFSYSFFPKKLNTNFSAINGYTYNFSNRYPFHSSVLCSSQISQQPQICSQTPSPILIDKSFLCVSEAKSENELWAASCLRVRTFYGFHHEILNIENADHTKYLTEREFEALTERIAGKRVGFGRVSCINATLPFSEVSNVAYDLSTSCKFSHDNADLVVVGTLDVNQCIRLPDEITGMKPKGIGADFARGYLSNVCVAGELQRNGLGYALICKAKTVAKDMGISDLYVHVAIDNEPAKKLYIKCGFVQENEEPAWQARFLDRPRRLLLWTDLSNSSDVSM	At4g28030	XP_004242650.1	2	5	2	0.52	0.00335323	4	0	4	26.24	misc.GCN5-related N-acetyltransferase	-	-	5	Cp	possibly Cp	Cp	C	55.4	plastid stroma	plastid	-
	Solyc05g005900	GNAT	GCN5-related protein (AHRD V1 **-- B2D2G9_BRAOL); contains Interpro domain(s) IPR000182 GCN5-related N-acetyltransferase	MAAAISLSFSLDPQTQHNYHHRFHHNTSFNSHKASIFTPKYTFPFVISSKSHTSNLIIPLSTSQSSSSSSSTSPSSVFQTPLQTGRFLTNQELEKLESLGKYRYFQELESGSLWVRVMREEEMDVTVWLLAESFSDSMLMPKGYVKFMAYLVKQYMIERRALMPYTATLLGFYRENGEDADLQLAGTVEVCFDKRGANANSPTPTPPKNSPYICNMTVDKLLRRRGIGWHLLKASEELISQMSSSREVYLHCRMIDTAPLNMYRKAGYTIVETDNIFILLALQRRKHLMWKVLPDSESLSEVDECTSSVDT	At1g24040	XP_004238694.1	1	3	1	0.166	0.00107045	3	0	3	26.24	misc.GCN5-related N-acetyltransferase	Cp	46	4	Cp	possibly Cp	Cp	Cp	75.3	plastid	plastid	-
A Proteins were identified by acetone preparations and/or the gel method. For emPAI and Mol% calculations, only the data from the acetone prepartions were used. Proteins identified solely by the gel method have data for the number of peptides, PSMs and unique peptides.
B Names of tomato proteins were based on the literature, NCBI annotation (identified in BlastP searches), and/or SolyGenomics descriptor. In a small number of cases, tomato protein names were assigned based on NCBI annotations and the Arabidopsis homolog.
C Some Sol Genomics descriptors were updated when NCBI annotations and Arabidopsis gene annotations were aligned.
D Target P's subcellular locations are: chloroplast (Cp), mitochondria (M), secretory (S), and no predicted location is indicated by a dash (-).
E ChloroP was used to predict the presence of a chloroplast transit peptide (Y) and the lack of a predicted transit peptide is indicated with a dash (-).
F Predotar's predicted subcellular locations were: chloroplast/plastid (Cp),endoplasmic reticulum (ER) or mitochondrion (M). For proteins with localization predictions that were less clear, Predotar provided categorized of possibly Cp, M and ER. Proteins with unresolved locations or that did not have a homolog detected by Predotar are indicated with a dash (-).
G WoLF PSORT's and YLoc's predicted subcellular locations were: chloroplast/plastid (Cp), cytosol (C), cytoskeleton (Cy), endoplasmic reticulum (ER), extracellular (EX), golgi apparatus (G), mitochondrion (M), nucleus (N), peroxisomes (P), plasma membrance (PM), and vacuole (V). Proteins with no chloroplast location in WoLF PSORT are indicated by not Cp.The number of proteins predicted to be in t…

## Sheet: Table S10E-Proteolysis
Table S10E. Tomato peptidase and peptidase-associated proteins.
Gene and protein descriptors							ProteomicsA								Algorithms								Databases
Category	Tomato Gene ID	Gene nameB	DescriptionC	Protein Sequence	Arabidopis homolog	Tomato proteinB NCBI accession	Peptides	PSMs	Unique Peptides	emPAI	Mol%	Acetone samples	Gel samples	Total	TargetP D ver.1	Transit peptide length	TargetP (reliability class)	ChloroP E	Predotar F	WoLF PSORT G	YLoc G	YLoc % Confidence	PPDB	SUBA4	plprot
Presequence proteases	Solyc02g091580	TOP1	Oligopeptidase A (AHRD V1 ***- Q9LSL3_ARATH); contains Interpro domain(s) IPR001567 Peptidase M3A and M3B, thimet/oligopeptidase F	MKYRRIGSPLSRILYGSSTTPSLILSLFLILMATRFSLSRSARLCLRPTSTFSRLSTKNLLQCPSCPLWSSSFSLCLHTFRKSTSPGKSITVRSFSPSSASISDHPSKMSMASDDNPLLKDFDFPPFDVIEAKHVRPGIRALLNKIEEELSALEKSVEPTWPKLAEPLEKIIDRLTVVWGAVNHLKSVKDNPELRSALEEVQPEKVAFQLKLGQSKPIYNAFKAIRESPEWDSLSDARKRIVESQIKEAVLSGIALEDDQREQFNKIEQDLAKLSQKFDENVLDSTKKFEKLIIDKKDIDGLPATSLGLAAQTAVSKGHENATAEDGPWIITLDAPSYMSVIQHAKNRTLREEVYRACINRASSGDLDNTEIINQILKLRLEKAKLLGYNNYAEVSMAM…	At5g65620	XP_004231980.1	28	113	28	8.454	0.0545158	5	3	8	M	102	5	Cp	M	Cp	PM	90.8	plastid stroma mitochondria	plastid	plastid
	Solyc01g108600	PREP1	Presequence protease, mitochondrial (AHRD V1 **-- PREP_DANRE); contains Interpro domain(s) IPR013578 Peptidase M16C associated	MERAVLLRSLSSTSTLAFSRIFSRSSHRFASYSARRHRLLQNLQRRRSLVRSNVRGISSSINLKRQFYPLSVRAIATSSPQSSQEFLGADDEVAEKFGFEKVSEQFIDECKSKAVLYKHKKTGAEVMSVSNDDENKVFGVVFRTPPKDSTGIPHILEHSVLCGSRKYPLKEPFVELLKGSLNTFLNAFTYPDRTCYPVASTNTKDFYNLVDVYLDAVFFPKCVEDFQTFQQEGWHYELNDPSDEITFKGVVFNEMKGVYSQPDNLLGRTSQQALFPDNTYGVDSGGDPRVIPSLSFEDFKEFHRKFYHPSNARIWFYGDDDPNERLRILSEYLNMFDASSAPHESRVEPQRLFSEPVRIVEKYPVGEDGDLKKKHMVCVNWLLSDKPLDLETELALGFL…	At3g19170	XP_004230817.1	54	266	54	26.953	0.173807	5	3	8	Cp	73	4	Cp	Cp	Cp	M	82.1	plastid stroma mitochondria	mitochondrion plastid	-
	Solyc03g118430	SPP	Peptidase M16 family (AHRD V1 *--- D3IC43_9BACT); contains Interpro domain(s) IPR011237 Peptidase M16, core	MQATSVVFNTKPVLAPIHVKSRYSEPSSSLVASQSNWVHRKKSVKLRPRRHPQNRAYFIQHKNVQGRCLHQNVEQLNRANILYRRQPVSCFLYPRTRQTLPKRPKNGVFLDKSSFHLSKQLRANISVPRATVGPDEPHAASTTWTEGVLEKQGFDMLDPEVERAEFEQFLSSEFPSHPKLYRGQLKNGLRYLILPNKVPPNRFEAHMEVHVGSIDEEDDEQGIAHMIEHVAFLGSKKREKLLGTGARSNAYTDFHHTVFHIHSPTSTKGSEGDCLPVVLDALNEIAFHPKFLASRVEKERRAILSELQMMNTIEYRVDCQLLQHLHSENKLSKRFPIGLEEQIKKWDADKIRKFHERWYFPANSTLYIVGDIDNIPQTIYHIEDVFGQTEMDNESNSAP…	At5g42390	XP_010318661.1	6	22	6	0.569	0.00366921	5	3	8	Cp	60	2	Cp	-	Cp	N	64.1	plastid stroma	plastid	-
	Solyc12g008630	MPP-a	Mitochondrial processing peptidase alpha subunit	MYRCVSSRLSSLKARQGNRVLTRFSSSAAVATKPSGGLFSWITGDTSSSVTPLDFPLNDVKLSPPLPDYVEPAKTRITTLANGVKVASEASVNPAASIGLYVDCGSIYETPVSYGATHLLERMAFKSTLNRSHLRIVREIEAIGGNVTASASREHMIYTYDALKTYVPQMVEMLVDCVRNPAFLDWEVKEQLEKVKAEISEYSKNPQHLLLEAVHSAGYAGPYGNSLMATEATINRLNSTVLEEFVAANYTAPRMVLAASGVEHEEFLKVAEPLLSDLPKVSATEEPKPVYVGGDYRCQADAEMTHFALAFEVPGGWMSEKESMTLTVLQMLMGGGGSFSAGGPGKGMYSRLYLRVLNQYPQIHAFSAFSSIYNNTGLFGIQGTTGSDFGPQAVDVAVK…	AT3G16480	XP_004251648.1	1	1	1	0.136	0.000876999	1	0	1	M	na	2	Cp	M	Cp	M	100	plastid mitochondria	mitochondrion	-
Clp proteins and associated proteins	Solyc03g118340	CLPC2H	ATP-dependent CLP protease ATP-binding subunit CLPA homolog CD4A, ATP-dependent CLP protease ATP-binding subunit (AHRD V1 **-* Q85G08_CYAME); contains Interpro domain(s) IPR013093 ATPase associated with various cellular activities, AAA-2	MMARALVQSTNILPSVAGERAGQFNGSRKDQRTVRMLCNVKCCSSRLNNFAGLRGCNALDTLLVKSGETLHSKVAAATFVRRPRGCRFVPKAMFERFTEKAIKVIMLAQEEARRLGHNFVGTEQILLGLIGEGTGIAAKVLKSMGINLKDARVEVEKIIGRGSGFIAVEIPFTPRAKRVLELSLEEARQLGHNYIGSEHLLLGLLREGEGVAARVLENLGADPTNIRTQVIRMVGESSEAVGASVGGGTSGLKMPTLEEYGTNLTKLAEEGKLDPVVGRQAQIERVTQILGRRTKNNPCLIGEPGVGKTAIAEGLAQRIANGDVPETIEGKKVITLDMGLLVAGTKYRGEFEERLKKLMEEIKQSDEIILFIDEVHTLIGAGAAEGAIDAANILKPALA…	At5g50920	NP_001316890.1 D'Andrea et al (2018)	42	422	10	23.484	0.151437	5	3	8	Cp	43	4	Cp	possibly Cp	Cp	C	69.2	plastid stroma envelope-inner-peripheral-stromal-side	plastid	plastid
	Solyc12g042060	CLPC1H	ATP-dependent CLP protease ATP-binding subunit CLPA homolog CD4B, chloroplastic, ATP-dependent CLP protease ATP-binding subunit (AHRD V1 **-- Q85G08_CYAME); contains Interpro domain(s) IPR013093 ATPase associated with various cellular activities, AAA-2	MARALVQSTSIPSSVAGERTTKFNGSGKTKRAVTMLCNAQSSSLTLRDFTGLRGCNAIDTLVRSGQTLQSKVAAATYVRRPRGCRFVPKAMFERFTEKAIKVIMLAQEEARRLGHNFVGTEQILLGLIGEGTGIAAKVLKSMGINLKDARVEVEKIIGRGSGFVAVEIPFTPRAKRVLELSLEEARQLGHNYIGSEHLLLGLLREGEGVAARVLENLGADPSNIRTQVIRMVGESNEAVGASVGGGTSGQKMPTLEEYGTNLTKLAEEGKLDPVVGRQPQIERVTQILGRRTKNNPCLIGEPGVGKTAIAEGLAQRIANGDVPETIEGKKVITLDMGLLVAGTKYRGEFEERLKKLMEEIKQSDEIILFIDEVHTLIGAGAAEGAIDAANILKPALARG…	At5g50920	NP_001332862.1 D'Andrea et al (2018)	51	631	19	63.223	0.407695	5	3	8	Cp	36	3	Cp	Cp	Cp	C	74.2	plastid stroma envelope-inner-peripheral-stromal-side	plastid	plastid
	Solyc03g117950	CLPD ERD1	Chaperone protein ClpD (NCBI, supported by At5g51070), Chaperone protein ClpB 1 (AHRD V1 **-- D0CK17_9SYNE); contains Interpro domain(s) IPR013093 ATPase associated with various cellular activities, AAA-2	MELSCSSPLSVNSTISFNRYVSVYPHRRCQSVLSLFPYYPSSSSHVATTATASAPCSTSSSSSTLFGISLSHRPSSSVHRKIKRSMYIVSGVFERFTERSIKAVMFSQKEAKALGKDMVSTQHLLLGLIAEDRSPGGFLGSRITIDKAREAVRSIWLGDSEDDTTKLGSQDSSSATSATDVAFSSSTKRVFEAAVEYSRTMGYNYIAPEHIAIGLFTVDDGSAGRVLKRLGANVNRLAAEAVSRLQGELAKDGRDPISFKRSREKSFPGKITIDRSAEKAKEKNALEQFCVDLTARASEGLIDPVignaRETEVQRMIEILCRRTKNNPILLGQAGVGKTAIAEGLAINIAEGNIPAFLMKKRVMSLDIGLLISGAKERGELEARVTTLIKEVKESGHI…	At5g51070	XP_010318683.1	17	63	17	3.184	0.0205321	5	3	8	Cp	69	2	Cp	Cp	Cp	N	76.1	plastid stroma	plastid	plastid
	544163637	CLPP1	CLP protease proteolytic subunit (chloroplast) [Solanum lycopersicum]	MPIGVPRVVFRNPGDPISSWVDIYNRLYRERLLFLGQGIGTELSNQLIGLMLYLSMEDENKDLYLFVNSPGGWVIPGIAIYDTMQFVRPDIHTICLGLAASMGSFILAGGQLTKRIAFPHARVMIHEPYSGFYMAQVGEFVLEAIEMAKLRETLTRVYAEKTGQPVWVIHEDMERDIFMSATEAQAYGIVDFVAVQGKEHGFHADL	Atcg00670	YP_008563113.1 D'Andrea et al (2018)	4	40	4	38.811	0.250273	5	3	8	-	-	-	-	-	-	-	-	plastid stroma	plastid	-
	Solyc02g091280	CLPP3	ATP-dependent Clp protease proteolytic subunit-related protein 2, ATP-dependent Clp protease proteolytic subunit (AHRD V1 **** B9H362_POPTR); contains Interpro domain(s) IPR001907 Peptidase S14, ClpP	MEGSCLTFSTALAPARPSTCLHYNSTFVKQFQTNTITPRRGLSVKASTHKPTLSTNWDVSSYSKAPAWMPRFEELDTTNMLLRQRIIFLGSQVDDITADFIISQLLILDAEDDKKDIRLIINSPGGSVTAGMGIYDAMKMCKADVSTICMGLAASMGAFLLASGSKGKRYCMPNAKVMIHQPLGTSGGKATEMGIRIREMGYHKMKLNKILSRVTGQPLEKIEVDTDRDNFMNAWESKEYGLVDAVIDDGKPGLVAPITEDAPPPKTRVWYKWKAEGTRKRKNNWPSEEKLFQNDEQSNEQKDEALSPL	At1g66670	XP_004232007.1 D'Andrea et al (2018)	6	30	6	3.125	0.0201516	5	3	8	Cp	45	2	Cp	possibly Cp	Cp	Cp	91.7	plastid stroma	plastid	plastid
	Solyc08g075750	CLPP4	ATP-dependent Clp protease proteolytic subunit (AHRD V1 ***- A9PA38_POPTR); contains Interpro domain(s) IPR001907 Peptidase S14, ClpP	MESLTLSTSLSPHCPSFNLRHASLPKLSPTFSPYPSRKTPLSLKSSLTSHQSTSKPLSDSHLVADDKLSLLLASAPQSPGMAMRGAEGDAMGLLLRERIIFLGSSIDDFFADAIISQLLLLDALDSTKDIRLFINCPGGSLSATMAIFDVVQLVRADVSTVALGISASTASIILAGGTKGKRYAMPNTRIMIHQPLGGASGQAIDVEIQAREIMHNKDNVIKIFSNSTGRSYEQVQKDIDRDRYMSPIEALEFGLIDGVIDRDSIIPLMPVPEKVKRTLRNQDLIQDPMKFLNPDIPDDEIY	At5g45390	XP_004245978.1 D'Andrea et al (2018)	6	32	6	4.623	0.0298115	5	3	8	Cp	72	1	Cp	Cp	Cp	Cp	100	plastid stroma	plastid	plastid
	Solyc01g100520	CLPP5	ATP-dependent Clp protease proteolytic subunit (AHRD V1 ***- Q93YH0_SOLLC); contains Interpro domain(s) IPR018215 Peptidase S14, ClpP, active site	MAHSCIATTSSLSKYNSAIFPSDYCNISPISLQFKRLSLRKVKAVGKVKSRGNSTVKAVYSGGDWDLAKASRSSGIWSIRDDVQIPSSPYFPTYAAQGQGPPPMVQERFQSVISQLFQYRIIRCGGAVDDDMANVIVAQLLYLDAVDPTKDIVMYVNSPGGSVTAGMAVFDTMRHIRPDVSTVCVGLAASMGAFLLSAGTKGKRYSLPNSRIMIHQPLGGAQGGQSDIEIQANEMLHHKANLNGYLAYQTGQSLDRINQDTDRDFFMSAKEAKEYGLIDGVIMNPMKALQPLAAAAEQS	At1g02560	NP_001334032.1 D'Andrea et al (2018)	8	60	8	27.48	0.177205	5	3	8	Cp	57	3	Cp	Cp	Cp	Cp	100	plastid stroma	plastid	plastid
	Solyc10g051310	CLPP6	ATP-dependent Clp protease proteolytic subunit (AHRD V1 **** Q42886_SOLLC); contains Interpro domain(s) IPR018215 Peptidase S14, ClpP, active site	MVTSAIAGTSIVPVSSRHQTSFSSLLSSRSLRKNVVSVLRSPYSDSSDIGFSSKKLGIPLKFNEYESGAHTNSSYGVIVAKEGANPPIMPAVMTPVGALDLSTVLFRNRIIFIGQPVNSAVAQKVISQLVTLATIDENADILIYLNCPGGSTYSVLAIYDCMSWIKPKVGTVCFGAAASQGALLLAGGEKGMRYAMPNARIMIHQPQSGCGGHVEDVRRQVNEAVQSRQKVDKMYAAFTGQSIEMIQTYTERDRFMSSAEAMEFGLIDGVLETEY	At1g11750	NP_001234684.1 D'Andrea et al (2018)	2	17	2	1.154	0.00744159	5	3	8	Cp	36	2	Cp	Cp	Cp	Cp	100	plastid stroma	plastid	plastid
	Solyc10g049710*	CLPR1	ATP-dependent Clp protease proteolytic subunit-related protein 1; ATP-dependent Clp protease proteolytic subunit (AHRD V1 ***- B9HMY7_POPTR); contains Interpro domain(s) IPR001907 Peptidase S14, ClpP	MSMASSLLLSPLSCPTLANNPSHIVLNKSTFLPTPNFFFSDSLHRPNAGVRGYSYSSPVAQSFNHIPKQFRQDYLKDGLLNNYKNAPQYLYGLSPSQMDMFMTEDNPARRQSGSVTEENISSSHNYLKNGGMWSMSGMNKQGPSTCSMSVSMYGGGGARSDRSPTAPPDLPSLLLDARIVYLGMPIVEAVTELIVAQFMWLDFDNPTKPVYLYINSSGTQNDEMETVGSETEAYAIADMIRYCKSDVYTVNCGMAFGQAAMLLSQGKKGFRAVQPNSSTKLYLPKVSKSSGSPTELWIKAKELESNSEYYLELLSEGIGKPKEEIKKDILRPKYFRAQEAIDYGLADKIISSSDDAFDKRNYEEMLIQSRMSRPGAQAAPSGFR	At1g49970	XP_004248765.1 D'Andrea et al (2018)	7	75	7	7.377	0.0475707	5	3	8	Cp	51	2	Cp	Cp	Cp	Cp	91.6	plastid stroma	plastid	plastid
	Solyc08g079620	CLPR2	ATP-dependent Clp protease proteolytic subunit (AHRD V1 **** A5ADV7_VITVI); contains Interpro domain(s) IPR001907 Peptidase S14, ClpP	MAVALPTSSSSYLHSKTKIPKSSLSCSSKVYVGLRIQSPGSYGVATSNSNVDFFNRVHKSIKSGTKDGKATRAQVTMMPIGTPKVPYRNPVDASWQWVDIWNALYRERVIFIGEEITEEFSNQILATMLYLDSIDNSKKLYMFINGPGGDLTPTLAIYDTMQSLKSAVGTHCVGFAYNLAAFLLAAGEKGNRCAMPLARIALESPAGAARGQADDIRNEAEELLRIRNYLFKELSEKTGQPIEKVHKDLSRVKRFTAKEALEYGLIDRIVRPNRLDGDAPPRDITAGLG	At1g12410	XP_004245699.1 D'Andrea et al (2018)	5	23	5	2.455	0.0158311	5	3	8	Cp	62	2	Cp	Cp	Cp	Cp	99.9	plastid stroma	plastid	plastid
	Solyc01g099690	CLPR3	ATP-dependent Clp protease proteolytic subunit-related protein 3 (NCBI), ATP-dependent Clp protease proteolytic subunit (AHRD V1 ***- B9RFA9_RICCO); contains Interpro domain(s) IPR001907 Peptidase S14, ClpP	MATCLRLPMASSIPCSSSSSMTLKHRSFNFRCAAYSNSSSNIPMPPFNPKDPFLSKLASVAANNPDALFSRPQNSDMPPFLDIYDSPKLMATPAQVERSVSYNEHRASTPPPDLPSMLLHGRIVYIGMPLVSAVTELVIAELMYLQYMDPKAPIYLYINSTGTTRDDGETVGMEAEGFAIYDSMMQLQNEIHTVAVGAAIGQACLLLAAGTKGKRFMMPHAKAMIQQPRAPSSGLMQASDVYIRAKEVLVNRDNLVKLLAKHTENSEETVSNVMRRPYYMDSIKAREFGVIDKILWRGQEQEQIIASVDAPEVWDNRAGIKVADAF	At1g09130	XP_004230237.1 D'Andrea et al (2018)	10	62	10	12.895	0.0831536	5	3	8	Cp	31	2	Cp	Cp	Cp	Cp	99.9	plastid stroma	plastid	plastid
	Solyc08g077890	CLPR4	ATP-dependent Clp protease proteolytic subunit (AHRD V1 **** D7MC33_ARALY); contains Interpro domain(s) IPR001907 Peptidase S14, ClpP	MEAVTIASHFSPATGIRLSSTASCRASAPKRTLRFSPSTKSSLSTTFISPFIGSSLFSDLSGQRIRPDSLYPSSSTGFIPKRAVVTMVIPFGGDPSQDHPPDLASYLFKNRIVYLGMSLVPSVTELILAEFLYLQYEDEDKPIYFYINSTGTTKGGEKLGYETEAFAVYDVMSYVKPPIFTLCVGNAWGEAALLLAAGSKGNRAALPSSTIMIKQPISQFQGQATDVEIMRKEVNNVKAELVKLYSENTGKSPEEIEEDIKRPKYFSPSEAVEYGIIDKVVYNERGNKDRGVVSDLKKAQLI	At4g17040	XP_004245821.1 D'Andrea et al (2018)	6	39	6	13.678	0.0882028	5	3	8	Cp	96	1	Cp	Cp	Cp	Cp	99.8	plastid stroma	plastid	plastid
	Solyc05g012620*	CLPF	Clp protease adapter protein ClpF, chloroplastic, Previously called UVR. Hemimethylated D binding protein (AHRD V1 *-*- B0T8J4_CAUSK); contains Interpro domain(s) IPR011722 Hemimethylated D-binding region	MVQSVSMSTLATSRYCGFCGSTCLRRQFGQIKETTIGFGESQFVWNDRRKNLSFATNIDMLKPRNLRVQAGWLFKGGDKSSEASIERSENANEDILMFFFQLDLATRVQYALNVEQYEIAQQLREKLTEVETEVLKQQESRRGSASKSEAQDMAISILRLRADLQNAVQSENYDLAAKLRDEISELEAESLTTSIRAQAYENAQYAFRLGQKVKHKNFGYRGVICGMDPICCESNSWMENAQVEKLTRGPDQPFYQVLVDVHTDPNLLVAYVPEESLVAPSEPDKDRFDHPYTSFLFFGMDAAGDFIPIKQLREKYNKPRHEVPYDPDNEKSGESS	At2g03390	XP_004239079.1	6	38	6	3.924	0.025304	5	3	8	M	35	4	-	Cp	Cp	C	76.3	plastid stroma	plastid	-
	Solyc03g119700	CLPS	ATP-dependent Clp protease adaptor protein ClpS containing protein IPR003769 Adaptor protein ClpS, core	MVMETAICGRVALSPHQIFQPKPGDKKPRQKQWTNRLMAMSIAGAGKGGGLLEKPVIEKTTPGRESEFDLRKSRKMSPPYRVMLHNDNFNKREYVVQVLMKVIPGMTVDVNIMQEAHHNGLAVVIICAQADAEEHCTQLRGNGLLSSIEPASGGC	At1g68660	XP_004235826.1	3	10	3	2.594	0.0167275	5	1	6	-	-	3	-	-	Cp	Cp	81.97	plastid stroma	plastid	-
	Solyc03g007110	CLPT1	ATP-dependent Clp protease ATP-binding subunit ClpC (AHRD V1 *-*- D6KVC7_SCAIO); contains Interpro domain(s) IPR004176 Clp, N-terminal	MATHSFSLLPIQSLTSNSSNKQSENTNTFLTHKYCKALATSFTGGKLLIRPQNLNSVTPKRRRSTVATVAFSLPITKPEGYEKQPKWSSRAIQAFVMAELEARKIKYPSTGTEALLMGILVEGTSLAAKFLRANGITFFKVSEETLKLLGKSDMYYSNPESPPLTKPARKALDWAVNEKLKSGEDGEITVTHIVLGIWSVKESAGHIIMSTLGFDDEKAKELAKFMDKDSELTYK	At4g25370	XP_004234159.1 D'Andrea et al (2018)	6	44	6	26.826	0.172988	5	3	8	Cp	66	2	Cp	Cp	Cp	Cp	99.4	plastid stroma	plastid	plastid
	Solyc08g079660	CLPT2	ATP-dependent Clp protease ATP-binding subunit ClpC (AHRD V1 *-*- D5A5L7_SPIPL); contains Interpro domain(s) IPR004176 Clp, N-terminal	MAVQAISTVAATSKSINQLNCRGTDSFLWTKNPLELKNLQCKWLGTPIKFSLQSKNFKQFLSKQCTIRANVSFVLPRGKSEPTVPIEKIPKWSAKAVKSFTMAELEARKLKYDTTGTEALILGMLIEGTNFASKYLMANSITLLKFREEAIKILGKGDVFHCSPKEPPLTEDAQKALDWAFDEKLKSGNGGEITTTHVLLGVWAQQGSPGYKVLAALGFNDEKAKELENIITDPGFVDD	At4g12060	XP_004245696.1 D'Andrea et al (2018)	12	47	12	9	0.0580367	5	3	8	Cp	93	4	Cp	Cp	Cp	Cp	98.4	plastid stroma	plastid	plastid
Cabroxyl-terminal processing protease	Solyc02g071190	CTPA1	Carboxyl-terminal-processing protease (AHRD V1 ***- B6SPN8_MAIZE); contains Interpro domain(s) IPR004447 Peptidase S41A, C-terminal protease	MRLLHSPLPSPSPPLLTSFSPIKASISPKKSSFVSHHEPLQQLLSTGVSLVLSLGLLVSAPISIALESPSLQSSNSSLEVICRENEGEEVYEKDTEVSKVVSNENIVEEAWQIVNDSFLNTSDRRSWSPESWLQKKDDILSSSIQTRSKAHDIIKRMLASLGDPYTRFLSPEQFSKMARYDMTGIGVNLRDVPDGNGGSKLKVLGLLLDGPAHNAGVRQGDELISVNGVDVLGKSSFEASSLLLGPNGTSVNIMVKHGNCGPVQSIDVERQSIAKTPVFYRLDQIENGSTSVGYVRLKEFNALARKDLVTAIKRLEGMGASSFVLDLRDNLGGLVQAGIEIAKLFLNEGDTVIYTVGRDPQNTRNIVAEAPPLITAPVIVLVNKSTASASEIVATALHD…	At5g46390	XP_010316905.1	14	48	14	5.062	0.0326424	5	3	8	Cp	63	2	Cp	-	Cp	Cp	70.5	thylakoid-peripheral-lumenal-side	plastid	plastid
	Solyc12g097030	CTPA2	Carboxyl-terminal processing protease (AHRD V1 ***- Q5N158_SYNP6); contains Interpro domain(s) IPR005151 Peptidase S41	MEALLGSSNSPSFTIIRRNPITSFKVLSWNSLYSGSNKSRVYHPILCLKRSGNDNSGSCSPSCYIEQMYRNRMFSQPIRRCRKIFIDKQSLLVIQNGLAFIPRKFKSSLRKTLKHSELCKSIVPEIFVRSCIGLMLVMAVNAAVVKAPSFALTEENLLFLEAWRTIDRAYIDKTFNGQSWFRYREDALRNEPMNTRQETYAAIKKMLATLNDPFTRFLEPEKFKSLRSGTQNALTGVGLSIGYPLGKNESASGLVVISASPGGPANRAGISSGDIILQIDNTSTENMGIYDAAERLQGPEGSGVELTVLHGSERRQLPLIREKVSLNPVKSRICKLPTGGDDAPLIGYIKLSTFNQNASGAVREAIETLRKNNVKAFVLDLRDNSGGLFPEGVEIAKIW…	At4g17740	XP_004253014.1	18	76	18	3.758	0.0242335	5	3	8	Cp	46	4	Cp	Cp	Cp	C	60.4	thylakoid-peripheral-lumenal-side	plastid	plastid
	Solyc03g059260	CTPA3	Carboxyl-terminal-processing protease (AHRD V1 ***- B6T6L2_MAIZE); contains Interpro domain(s) IPR004447 Peptidase S41A, C-terminal protease	METLCSNINVGSSISKPSFCYRFPSLTHRRGAACRRKELIPISLVGENDQNLVKCIGKGVignaLAAATVLSFSSYSPAFAQSLTVAFPVSHTPEVNTVQRTLIEAWSLIRETFVDPTFNHQDWDLKLQQTMVEMFPLRSEDAAYSKVRGMLSTLGDPYTRIISPKEYQSFRIGSDGNLQGVGLFVSVEPNTGHLVVLSCVENSPAARAGIHEGDELLEINGERLDGVDSETAAQKLRGRAGTTVTVKVHRDIGAGVSSYQEVKLPREVIKLSPVSSTIIPHKMPDGRLLKTGYVKLSSFSQSAAMEMENTIQDMENQGVESYILDLRNNPGGLVTAGLDVAQIWLDGDETLVNTVDRDGNMAPISMVNGHAVTHDPLVVLVNEGSASASEILAGALHD…	At3g57680	XP_010317889.1	2	4	2	0.389	0.00250847	4	0	4	Cp	25	5	-	-	Cp	C	50.9	thylakoid-peripheral-lumenal-side	-	-
DEG proteases	Solyc02g086830	DEG1	Protease Do-like (S2 serine-type protease) (AHRD V1 **** Q7UQ70_RHOBA); contains Interpro domain(s) IPR001254 Peptidase S1 and S6, chymotrypsin/Hap	MAASSHSLASSACFSTTPARKFSGSDRFQLAKSLLCRKIPGFSGSVVCArRNAICSNYASSGDQSNYGKKLMDSIFVACTSVALSFSLYIADVDPASAFVVTSPRKLQTDELATVRLFQENTPSVVYITNLASRQDMFTLDVFEVPQGSGSGFVWDKNGNIVTNYHVIRGASDLRVTLADQTTYDAKVVGFDQDKDVAVLHIDAPKDKLRPIPIGVSADLLVGQKVFAIGNPFGLDHTLTTGVISGLrRNAEINSAATGRPIQDVIQTDAAINPGNSGGPLLDSSGNLIGINTAIYSPSGASSGVGFSIPVDTVSGIVDQLVQFGKVTRPILGIKFAPDQSVEQLGVTGVLVLDAPPNGPAGKAGLLPTKRDSYGRLILGDIITSINGKKVSNGTDLYR…	At3g27925	XP_004232295.1	13	137	13	11.915	0.0768341	5	3	8	Cp	53	2	Cp	Cp	Cp	Cp	99.9	thylakoid-peripheral-lumenal-side	plastid	-
	Solyc06g084480	DEG2 I	Do-like2, Serine protease (AHRD V1 **** D8UJN6_VOLCA); contains Interpro domain(s) IPR015724 Serine endopeptidase DegP2	MAAANSWFSVLTSTGGYLTSHRLFSTSLTSSSFFIPQNQNYKRQVLNKSSSSPPEKVAGKQKFSrRNASKNEGPFANADGRSSTSENGRSQSTAIKSFGLQKKGKGVLLDSKDQQVETGSIQDAAFLNAVVKVYCTHTAPDYSLPWQKQRQFTSTGSAFMIGDGKLLTNAHCVEHDTQVKVKKRGDDTKYVAKVLARGVACDLALLSVESKEFWEAAEPLSFGRLPRLQDAVTVVGYPLGGDTISVTKGVVSRIEVTSYANGSSELLGIQIDAAINPGNSGGPAFNDDGDCIGVAFQVYRSDDAENIGYVIPTTVVSHFLEDYERNGKYCGFPCLGVLLQKLENPALRACLKVPSNEGVLVRKVEPTSDISNVVKEGDVIVSFDGVHVGCEGTVPFRSS…	At2g47940	XP_010323029.1	6	29	5	1.721	0.0110979	5	2	7	Cp	75	2	Cp	Cp	Cp	Cp	98.9	plastid stroma	plastid	-
	Solyc09g074420	DEG2 I	Do-like2, Serine protease (AHRD V1 **** D8UJN6_VOLCA); contains Interpro domain(s) IPR015724 Serine endopeptidase DegP2	MAAATCCFSAGTGTGNSLSFLTSHRPSTSLRPPSSLFIPKAVHQKSSSPPPHPPSQKAGGKQNFIWRSKDERHLANNDGRSSKNETGRSKSTAFKFSGLQRKGSGKGAPFESKEPQVETGFIEDAPFLNAVVKVFCTHTAPDYSLPWQKQRQFASTGSAFMIGDGKLLTNAHCVEHGTQVKVKrRNAGDDTKYVAKVLARGVECDIALLSVESKDFWKGAEPLCFGHLPHLQDAVTVVGYPLGGDTISVTKGVVSRVEVTSYAHGSSELLGIQIDAAINPGNSGGPAFNDDGECIGVAFQVYRSDDVENIGYVIPAMVVSHFLEDYERNGKYSGFPCLGVLLQKLENPALRACLRVPSNEGVLVRKIEPTSDVSNVVKEGDVIVSFDGVRVGCEGTVPF…	At2g47940	XP_004247469.1	5	24	4	1.239	0.00798971	5	3	8	Cp	92	2	Cp	Cp	Cp	Cp	99.7	plastid stroma	plastid	-
	Solyc08g048550	DEG5	Protease Do-like (S2 serine-type protease) (AHRD V1 **** A6CGY1_9PLAN); contains Interpro domain(s) IPR001254 Peptidase S1 and S6, chymotrypsin/Hap	MVVLGVVCPQPQHIVVSIRTQIPPISTQTQYCTrRNAKALIFTSSMISSFIYTSHHSPATAFQIEMPQQEEDRLVHLFQDTSPSVVFIKDLELAKGSNDSTKVLADDDNAKVEGTGSGFIWDKFGHIVTNYHVITKLATDNIGLQRCKVSLVNTKGESIVKDAKIVGVDPAYDLAVLKVDVEGVEVKPVSVGTSRGLRVGQSCFAIGNPYGFENTLTTGVVSGLGREIPAPNGAAIKGAIQTDAAINAGNSGGPLIDSSGHVignaLNTATFTrRNAGSGMSSGVNFAIPIDTVVRTIPYLIVYGTSYKDRY	At4g18370	XP_004244974.1	4	29	4	2.415	0.0155732	5	3	8	Cp	41	5	Cp	Cp	Cp	Cp	99.4	thylakoid-peripheral-lumenal-side	plastid	plastid
	Solyc02g067360	DEG8	Protease Do-like (S2 serine-type protease) (AHRD V1 **** Q7UQ70_RHOBA); contains Interpro domain(s) IPR001254 Peptidase S1 and S6, chymotrypsin/Hap	MEVIIVSSNAKTPIHLHTNQPQPPILNNSVFLGRRELCFDSISTVCSADPITSNPSTSVSAPRGGGDNGNSLIEQLRRSFPFATRRMLLTSFFMYSCYHPSRYLSALALGDPSVTVEQVTPTIFPSAALFPLEERVVELFEKNTYCVVNIFDVTLRPTLNVTGMVEIPEGNGSGVIWDKEGHIVTNYHVignaNSLSRNPSRGQVVARVNILAADGVQKNFEGILIGADRAKDLAVLKVGASEDLLRPIRVGESSSLRVGQQCLAIGNPFGFDHTLTVGVISGLNRDIYSQTGVTIGGGIQTDAAINPGNSGGPLLDSKGNLIGINTAIFTQTGTSAGVGFAIPSSTVLRVVPQLIQSGKVLRAGLNIEIAPDLIANQLNVRNGALVLLVPGNSPAAKA…	At5g39830	XP_004233360.1	9	30	9	3.437	0.0221636	5	3	8	Cp	60	5	Cp	Cp	Cp	C	69.4	thylakoid-peripheral-lumenal-side	plastid	plastid
EGY proteasesJ	Solyc10g081470	EGY1 Lutescent 2 (L2)	EGY1, Lutescent 2, Peptidase M50 family protein (AHRD V1 ***- C1FJH6_9CHLO); contains Interpro domain(s) IPR008915 Peptidase M50	MGTLTSCSFSIMNLRFRMNPPISCKFSRRIQMKRMSKRSLGRLIISCSSGSGGGGGGGSSSNDNGSSNDRKLEKDSSNLATVTEETAGERNSGGEASDSEDSSVSISSRPTISTVGSTYNNFQVDSFKLMELLGPEKVDPSEVKIIKEKLFGYSTFWVTKEEPFGDFGEGILFLGNLRGKREDVFAKLQSQLSEVMGDKYNLFMVEEPNSEGPDPRGGPRVSFGMLRKEVSEPGPTSLWQYVIAFLLFLLTIGSSVELGIASQITRLPPEVVKYFTDPNAIEPPDMQLLLPFVDSALPLAYGVLGVQLFHEIGHFLAAFPRNVKLSIPYFIPNITLGSFGAITQFKSILPDRKAKVDISLAGPFAGAALSSSMFAVGLLLSSNPSAAAELVQVPSTLFQ…	At5g35220	NP_001299816.1 Barry et al (2012)	1	1	1	0.179	0.00115428	1	0	1	Cp	46	2	Cp	Cp	Cp	PM	99.5	nucleus envelope-outer	nucleus	plastid
	Solyc06g019200	EGY2N	Peptidase M50 family protein (AHRD V1 ***- D7LZ04_ARALY); contains Interpro domain(s) IPR008915 Peptidase M50	MNIPAVLPCSFNRLQCSTPPAHLLRLVIRKKGRLVCRLSHDNNKEDDSVQDNNNNSHQDNDQPLENTSLENNDGPQLNGLTGFEDDTDDQLASESPLPGVKPQQLDESIRIPKETVEILRNQVFGFDTFFVTSQEPYEGGVLFKGNLRGQAAKTYEKVSKRMQDDKPVAVVVPRMTLQPETTAVPEWFAAGAFGLVTVFTLFLRNVPALQSNFLSVFDNLDLLKDGLPGALMTAFLLGVHEVSHRLVATEVGIKLSIPYFVPSWQIGCFGAITRILNVVPNREDLLKVAAAGPLAGFCVGFILLLSGFMLPPSDGIGIIVDPSVFHESFLAGGIAKLYLGDVLQEGSPISVHPLVIWAWAGLVINAINSIPAGELDGGRIAFAMWGRKASARLSALsig…	At5g05740	XP_004240688.1	1	2	1	0.292	0.00188297	2	0	2	Cp	37	3	-	-	Cp	PM	100	thylakoid	plastid	plastid
FtsH proteases & interacting protein	Solyc07g055320	FTSH2	ATP-dependent zinc metalloprotease FTSH 2 (NCBI), ATP-dependent Zn protease cell division protein FtsH homolog (AHRD V1 **** B2XTF7_HETA2); contains Interpro domain(s) IPR005936 Peptidase M41, FtsH	MATSSVCIAGNDLSTHRTQKVFRKEIYGRKILYSSNLPSSRKTSRVVVKASLQQGPHEGRRGFLKLLLGNVGLGVPALLGNGKAYADEQGVSNSRMSYSRFLEYLDKDRVQKVDLFENGTIAIVEAVSPELGNRVQRVRVQLPGLSQELLQKFREKNIDFAAHNAQEDSGSLIFNLIGNLAFPLILIGGLFLLSRRSNGGMGGPGGPGNPLAFGQSKAKFQMEPNTGVTFDDVAGVDEAKQDFMEVVEFLKKPERFTAVGARIPKGVLLVGPPGTGKTLLAKAIAGEAGVPFFSISGSEFVEMFVGVGASRVRDLFKKAKENAPCIVFVDEIDAVGRQRGTGIGGGNDEREQTLNQLLTEMDGFEGNTGIIVVAATNRADILDSALLRPGRFDRQVSVD…	At2g30950	XP_004243266.1	16	152	12	7.432	0.0479254	5	3	8	Cp	49	5	Cp	possibly Cp	Cp	C	100	thylakoid-integral	plastid	plastid
	Solyc04g082250	FTSH5	ATP-dependent zinc metalloprotease FTSH, chloroplastic (Fragment) (AHRD V1 ***- FTSH_CAPAN); contains Interpro domain(s) IPR005936 Peptidase M41, FtsH	MANAVLSSNFLGSQIFVSPPTPKTSRYFHLHSrRNAKYIVPQSILSKKSNSDNFKNVPSKAAIAALLFSSITPQAFALDNTTPAAPPQVIEAEAPKPSASNSLPFAQNIILNAPKTQAQPASDLPEGTQWRYSEFLNAVKKGKVERVRFSKDGSTLQLTAVDGrRNAANVIVPNDPDLIDILAMNGVDISVSEGEGGNGLFSVignaNLLFPIIAFAGLFFLFrRNASQGGPGGPGGLGGPMDFGRSKSKFQEVPETGVTFADVAGADQAKLELQEVVDFLKNPDKYTALGAKIPKGCLLVGPPGTGKTLLARAVAGEAGVPFFSCAASEFVELFVGVGASRVRDLFEKAKSKAPCIVFIDEIDAVGRQRGAGLGGGNDEREQTINQLLTEMDGFSGNS…	At5g42270	NP_001234196.2 At5g42270	21	158	20	11.915	0.0768341	5	3	8	Cp	57	2	Cp	Cp	Cp	Cp	92.6	thylakoid-integral	plastid	plastid
	Solyc06g005950	FTSH7K	Cell division protease FtsH homolog IPR005936 Peptidase M41, FtsH	MAIIEHHLRPFIHVQISLNFQYNPKYFYRHTFFCNRYGFLHEKPISLISQKTPFRLIFPKSLSGFDFLGKKNSQKKLTPREISVQANGSCQQDSDSTEKSESSGTDSKKSPGSEPGPRVPNSGSSRREKQGKDNWWWSKGRKLRWEPIVQAQEIGVLLLQLGIVMFVMRLLRPGLPLPGSDPRAPTMFVTVPYSEFLSKINSNQVQKVEVDGVHIMFKLKSEVSSSVIETEVVNVNENGNSKLQDSEAVIRSVTPTKKIVYTTTRPSDIKTPYEKMLENDVEFGSPDKRSGGFMNSALIALFYIAVLAGLLHRFPVNFSQSTAGQLRNRKSGGSGGTKVSELGETITFADVAGVDEAKEELEEIVEFLRNPDKYVRLGARPPRGVLLVGLPGTGKTLLA…	At3g47060	XP_004240393.1	1	1	1	0.061	0.00039336	1	0	1	-	-	4	-	-	Cp	Cp	98.14	envelope	plastid	-
	Solyc03g007330	FTSH11	ATP-dependent zinc metalloprotease FTSH 11 (NCBI), Cell division protease ftsH homolog (AHRD V1 *-*- FTSH_RICTY); contains Interpro domain(s) IPR005936 Peptidase M41, FtsH	MTTLQASLLFKPLPPLLHFSSSKHVRSLSFANALSCRRLSTTASAPFKTRFCRHNLLLHCTLNPEQVDSSSEFALSNNDDNSIPEMEPIEFNEPSVVQIGSVQNSSIDSNAGVVSSSFSDNEAASEVLVENDELKKKLPILVFLMGVFAKVKKGFENILLSDWFSWWPFWHQEKRLERLIADADANPNDAAMQSALLAELNKHSPESVIRRFEQRAHAVDSRGVAEYMRALVATNAIAEYLPDEQSGKPSSLPSLLQELKQRASGNMDEPFLNPGISEKQPLHVVMVDPKVSNRSSRFAQEFLSTIIFTIAIGLVWIMGATALQKYIGGLGGIGASGVGSSSSYAPKELNKEIMPEKNVKTFKDVKGCDDAKQELEEVVEYLKNPSKFTRLGGKLPKGI…	At5g53170	XP_004234177.1	1	2	1	0.077	0.000496536	2	0	2	Cp	42	2	Cp	-	Cp	ER	80	envelope	mitochondria plastid stroma	-
	Solyc10g086570	FIP	FtsH5-interacting protein (FIP) (based on At5g02160)	MASSSIACVQFSVKKSLVIPSTIVGTKSPVTHKNKKQRSLKVVAAIGDVSSDGTVYLIAGAAAVALVGTAFPILFSRKDLCPECDGAGFVRKGGAAALKANAARKDEVQIVCANCNGLGKLNQVDK	At5g02160	NP_001234311.1	1	1	1	0.389	0.00250847	1	2	3	Cp	43	3	Cp	Cp	Cp	Cp	96.5	thylakoid-integral	plastid	plastid
N-terminal peptidases	Solyc03g005340	AARE1	acylamino-acid-releasing enzyme (AARE), Prolyl endopeptidase (AHRD V1 *-** C0NUP9_AJECG); contains Interpro domain(s) IPR001375 Peptidase S9, prolyl oligopeptidase active site region	MTNILSPLAAIRTHSIVSVLLHSHRFPPLSSETRLLKQHRPISCRPFWLTKQSFSVFSKMDCVGASSPKEFPLGLDASLEEEYFSQSSLLQDFTSIPNIDKAWTFTSDGGSQGMFSISQPNLLANKKRRYILPCHISKESTNAVSFQWAAFPIEMSNVSMMIPSPSGSKLLVVRNPENDSPTKFEIWGSSLVEKEFYVPASVHGSVYSDGWFEGISWNSDETLIAYVAEEPAPSKPTFTTFGYKKDNSTDKECGSWKGQGDWEEEWGETYAGKRQPALFIIDVNSGVVRPVEGIGKSLSVGQVVWAPSREGLEQYLVFVGWPSDNRKLGIKYCYNRPCALYAVKAPFSKVEVHQSGTNAAKDVSPIKLTQSISSAFFPRFSPDGKLLIFLSARSSVDSW…	At4g14570	XP_004234027.2 Yamaguchi et al (2003) Walling (2006)	4	10	4	0.311	0.00200549	5	3	8	Cp	64	2	Cp	Cp	Cp	Cp	94.1	-	cytosol	-
	Solyc04g049630	AARE2	Dipeptidylpeptidase5-like, Peptidase S9 prolyl oligopeptidase active site domain protein (AHRD V1 **** B7K7L2_CYAP7); contains Interpro domain(s) IPR001375 Peptidase S9, prolyl oligopeptidase active site region	MGFSGIPALTRHYAFCYFASVSPFSSSLIHITPSTKLLTRKFSLPIRMSSTNPNVKKHIAPYGSWKSPITADIVSGSTKRLGGFSVDSLGRLFWLESRPTESGRAVIVKEPGKPGEDPIDVTPKDFAVRTLAQEYGGGDFCIQGDILIFSNYKDQRLYKQSISSLDSAPLPLTPDYGGRSVCYADGVFDSRFNRYVTVREDQRESGINAITTIVSIALSSNSDQEPRLLVGGNDFYASPRIDPKGDRIAWIEWGHPNMPWDRSELWVGYISENGDVQNRICVAGGDPTIVESPTEPLWSSQGELYFVTDRKSGFWNIYKWVESSNEVLPVYSLDAEFTRPLWIFGMKSYDFLKNHDQDTLIACSYRENGKSYLGVLDVNLGKISVLDIPFTDINNITSG…	At5g36210	XP_004237535.1 Walling (2006)	3	5	3	0.25	0.00161213	3	0	3	Cp	70	4	Cp	possibly Cp	Cp	Cp	99.9	-	plastid	-
	Solyc08g081250	APN	Similar to AtMPA1; Aminopeptidase N (AHRD V1 ***- D5C0C8_NITHN); contains Interpro domain(s) IPR012779 Peptidase M1, alanyl aminopeptidase	MAIPKSTTLQYIVFLKIHVSRRRCISIQKEFCVLVDQPFCKSSSIEFQASCRVTSVGRSRDICRYKKYLTSEVAHWRRCQIPRFPLVQPRRIDRRLICSVATEPLPKEVEESKMEAPKEIFLKDYKQPDYYFDTLDLKFALGEESTIVASKIAVNPRVEGQSFPLVLDGRDLKLQSVKINGNPLKEEDFHVDSRHLTLKSPPSSKFTLEIVTEIHPQKNTSLEGLYKSSGNFCTQCEAEGFRKITFYQDRPDIMAKYTCRIEADKSLYPVLLSNGNLIEQGDLEGGKHYTLWEDPFKKPSYLFALVAGQLVSRDDTFTTCSGRKVSLRIWTPAQDLPKtheAMYSLKAAMKWDEDVFGREYDLDLFNIVAVPDFNMGAMENKSLNIFNSKLVLASPETA…	At1g63770	XP_010325395.1 Walling (2006)	40	298	40	12.268	0.0791104	5	3	8	S	-	5	-	possibly Cp	Cp	C	57.5	plastid stroma	plastid	plastid
	Solyc01g099110	APP2	Aminopeptidase P2, Xaa-pro aminopeptidase (AHRD V1 **-- A1DF27_NEOFI); contains Interpro domain(s) IPR000994 Peptidase M24, structural domain	MDSSLSVSTTMLTCSSKLHHYPPRSFRFLTFSLPIFRKLGICPKFLSKSPKLTVRSSSSITAKPSWEFQKKDSGKEQDNKLRALREIFTGPGVNVDAYIIPSQDAHQSEFIAECYMrRNAAYISGFTGSAGTAVVTKDKAALWTDGRYFLQAEKQLNSSWDLMRAGNMGVPTPSQWLNTVLAPGCRIGIDPFLFSSDAAKEFKEDISKGNHELVFLYDFNLVDEIWKESRPNPPKEPIRLHDLKYAGVNVSSKLSCLRSELRNAGASAIVISMLDEIAWLLNLRGNDIRHSPVMYAYLVVEIDGAKLFVDDTKVTPEVMEHLTNAGIELRAYESILSEIESLAAKGANLWLDTSSVNAAIVNAYESACYKYPWDSATKSRKKRNANLNSNGQSGGPCAV…	At3g05350	XP_004230202.1 Walling (2006)	16	57	16	4.736	0.0305402	5	3	8	Cp	61	2	Cp	Cp	Cp	Cp	92	plastid stroma	plastid	plastid
	Solyc01g079450	cGEP AARE4L	Probably glutamyl endopeptidase; Peptidase S9 prolyl oligopeptidase active site domain protein (AHRD V1 ***- B4SK00_STRM5); contains Interpro domain(s) IPR001375 Peptidase S9, prolyl oligopeptidase active site region	MYEAVAMSLPKVYHRFSLLSLHSTTSPILPKTLFFSSYSLRLAVKRLHSPPLLRPQSRRFVAGKRFQAKSTMASSRFHHLVPVNALTAEDGGNGTGSNGAADATASVAYDDDVESASATGYRLPPFEIRDIVDAPPLPALSFSPLRDKILFLKRRSLPPLSDLARPEEKLAGIRIDGKCNSRSRMSFYTGIAIHQLMEDGSLGPEKEIQGLPKGAKINFVMWSNNGQHLAFSVRLDEDDGSSSKLRVWVANVDTGKARPLFESPDVYVNAVFDNFVWVNDSTLLVCTIPLSRGDPPRKPLVPSGPKIQSNEQKNVIQARTYQDLLKDEYDEDLFEYYATTQLVLASLDGEMKPFGPPAIYTSMDPSPDQTYILISSTHKPFSFVVPCGRFPKKVELWKA…	At2g47390	NP_004229392.1 Bhuiyan et al (2020) Walling (2006)	15	82	15	3.03	0.019539	5	3	8	Cp	5	3	Cp	Cp	Cp	Cp	50.2	plastid stroma	plastid	plastid
	Solyc11g007090	DAP2M	Aspartyl aminopeptidase IPR001948 Peptidase M18, aminopeptidase I	MSSLVAFAIGKKYSIGDGFHVIAAHTDSPCLKLKPKSASTKSGYLMVNVQTYGGGLWHTWFDRDLSVAGRVILRDDDGSFLHRLVKITRPLLRVPTLAIHLNRTVNQDGFKPNLETHLIPLLATKTETADSTEKSNVSSSKDVHHQLLLKILSDELSCKIEDIVSVELNICDTQPSCLGGANNEFIFSGRLDNLASSFCGLRALVDSCALPEDLSNENSIRMIALFDNEEVGSDSCQGAGAPTMFEAMRRITDCLSHQSAGETDFARAIRHSFLVSADMAHGVHPNFVDKHEEHHRPELQKGLVIKHNQRYATSGITSFLFKEVARLHSLPTQDFVVRNDMGCGSTIGPILAAGVGIRTVDCGIAQLSMHSVREICGKEDVDIAYKHFKAFYQSFSSID…	At5g04710	XP_004249975.1 Park et al (2017)	3	8	3	0.438	0.00282445	4	2	6	-	-	3	-	-	Cp	Cp	99.41	-	plastid	-
	Solyc12g010020	LapA1N	Leucyl aminopeptidase (AHRD V1 ***- D7DWG6_NOSA0); contains Interpro domain(s) IPR011356 Peptidase M17, leucyl aminopeptidase	MATLRVSSLFASSSSSLHSNPSVFTKYQSSPKWAFSFPVTPLCSKRSKRIVHCIAGDTLGLTRPNESDAPKISIGAKDTAVVQWQGDLLAIGATENDMARDENSKFKNPLLQQLDSELNGLLSAASSEEDFSGKSGQSVNLRFPGGRITLVGLGSSASSPTSYHSLGQAAAAAAKSSQARNIAVALASTDGLSAESKINSASAIATGVVLGSFEDNRFRSESKKSTLESLDILGLGTGPEIERKIKYAEHVCAGVILGRELVNAPANIVTPAVLAEEAKKIASTYSDVISVNILDAEQCKELKMGAYLAVAAAATENPPYFIHLCFKTPTKERKTKLALVGKGLTFDSGGYNLKVGAGSRIELMKNDMGGAAAVLGAAKALGEIRPSRVEVHFIVAACE…	At4g30920-like	NP_001233862.2 Gu et al (1996)	11	206	0	16.783	0.108225	5	0	5	Cp	42	2	Cp	Cp	Cp	Cp	99.8	plastid	plastid	-
	Solyc12g010030	LapA2N	Leucyl aminopeptidase (AHRD V1 ***- D7DWG6_NOSA0); contains Interpro domain(s) IPR011356 Peptidase M17, leucyl aminopeptidase	MATLRVSSLFASSSSSLHSNPSVFTKYQSSPKWAFSFPVTPLCSKRSKRIVHCIAGDTLGLTRPNESDAPKISIGAKDTAVVQWQGDLLAIGATENDMARDENSKFKNPLLQQLDSELNGLLSAASSEEDFSGKSGQSVNLRFPGGRITLVGLGSSASSPTSYHSLGQAAAAAAKSSQARNIAVALASTDGLSAESKINSASAIATGVVLGSFEDNRFRSESKKSTLESLDILGLGTGPEIERKIKYAEHVCAGVILGRELVNAPANIVTPAVLAEEAKKIASTYSDVISVNILDAEQCKELKMGAYLAVAAAATENPPYFIHLCFKTPTKERKTKLALVGKGLTFDSGGYNLKVGAGSRIELMKNDMGGAAAVLGAAKALGEIRPSRVEVHFIVAACE…	At4g30920-like	Q10712.2 Gu et al (1996)	10	151	3	12.594	0.0812126	5	0	5	Cp	42	2	Cp	Cp	Cp	Cp	60.3	plastid	plastid	-
	Solyc12g010040	LapNN	Leucyl aminopeptidase (AHRD V1 ***- D7DWG6_NOSA0); contains Interpro domain(s) IPR011356 Peptidase M17, leucyl aminopeptidase IPR000819 Peptidase M17, leucyl aminopeptidase, C-terminal	MAALRVSSALACSSSSSFHSYPSIFTKFQSSPIWSFSISVTPLCSrRNAAKRMAHSIARDTLGLTHTNQSDAPKISFAAKEIDLVEWKGDILTVGATEKDLARDGNSKFQNPLLQKLDSKLSGLLSEASSEEDFSGKAGQSTILRLPGLGSKRIALVGLGSPTSSTAAYRCLGEAAAAAAKSAQASNIAIALASTDGLSAELKLSSASAITTGAVLGTFEDNRFKSESKKPTLKSLDILGLGTGPEIEKKIKYAADVCAGVILGRELVNAPANVLTPAVLAEEAKKIASTYSDVFSANILDVEQCKELKMGSYLAVAAASANPAHFIHLCYKPSSGEIKKKIALVGKGLTFDSGGYNIKTGPGCSIELMKFDMGGAAAVLGAAKALGQIKPAGVEVHFI…	At4g30920	AAO15916.1 Tu et al	15	119	13	6.499	0.0419089	5	3	8	Cp	43	1	Cp	Cp	Cp	Cp	98.2	plastid stroma	plastid	plastid
	Solyc05g009780	MAP1C	Methionine aminopeptidase (AHRD V1 ***- B9SEJ2_RICCO); contains Interpro domain(s) IPR002467 Peptidase M24A, methionine aminopeptidase, subfamily 1	MAHATSSILHISSSINGETKCLSSSSQLRGNYPFHLPSSNNANFSKKLVIYAKRLSGLEEALRIrRNAERELRGSTTATrRNAPPLrRNAGRVSQRLPVPDDIPKPPYVGSRELPEISSEHQIHDAEGIARMRAACELAARVVDYAGTLVRPSVTTNEIDKAVHQMIIDAGAYPSPLGYGGFPKSVCTSVNECMCHGIPDSRQLQDGDIINIDVTVYLNGYHGDTSKTFFCGDVSESIKRLVKVTEECLHYGIAVCRDGALYRKIGKRISEHAEKFGYGVVDRFVGHGIGTVFHSEPLIFHHRNDKSGSMVEGQTFTIEPILTLGSTECVTWEDNWTTLTADGSPAAQFEHTILITKTGAEILTTY	At1g13270	XP_004238961.1	2	4	2	0.638	0.00411415	2	0	2	Cp	51	2	Cp	Cp	Cp	Cp	60.5	mitochondria plastid stroma	plastid	-
	Solyc02g090670	MAP1D	Methionine aminopeptidase (AHRD V1 ***- B9H6F3_POPTR); contains Interpro domain(s) IPR002467 Peptidase M24A, methionine aminopeptidase, subfamily 1	MVGFVSTFLGDCRFINHPHSLRRLFHYKPGNKHVSMQCSRTFSGLTDLLFNRRNVDELPNTNRKRLRPGQISPPRPVPEQIQRPPYVKSRKPPGIGSGSEVHDKKGIEKMRASGRLAAQVLQYAGTLVKPGIMTDEIDQAVHQMIIDNGAYPSPLGYGGFPKSVCTSINECICHGIPDSRPLEDGDIINIDVTVYLNGYHGDTSAMFFAGTVDEEAKNLVQVTKECLDKAISICAPGVEFNKIGKTIHDLADKHRYGVVQQFVGHGVGRAFHSDPVILHYRNNDRGRMILNQTFTIEPMLTIGSIDGVIWGDDWTVVTDDGSLSAQFEHTILITADGAEILTQC	At4g37040	XP_004232042.1	3	13	3	2.162	0.0139417	5	3	8	Cp	37	5	Cp	Cp	Cp	C	70.7	plastid stroma mitochondria	mitochondria plastid stroma	-
	Solyc11g044310	PAP1	Proline iminopeptidase (AHRD V1 ***- B9S7S3_RICCO); contains Interpro domain(s) IPR005944 Peptidase S33, proline iminopeptidase 1	MKLASTAIRAPSLFPCSNFTHLPASNSLSLSPKLPASIFSPLLIPISGRKKLSVRAGNLDCESVEQMDLKKEFPEFRKDLYPSIEPYSTGFLKVSDLHTIYWEQSGNPNGRPVVFFHGGPGGGTSPNNRRFFDPVFYQIILFDQRGAGKSKPHACLEENTTWDLVGDIEKLREHLKIPEWQVFGGSWGSTLALAYSISHPDKVTGIILRGIFLLRKKEIDWFYEGGAAAIYPDVWEPFRELIPEEERNCFVKAYHKRLNSDTLETQYAAARAWTKWEMMTSHLLPNEENIKKGDDDDFSLAFARIENHYFINKGFFSSDSFLLDNVEKIKHIKTIIVQGRYDVCCPMMSAWDLHKAWPEAEFIVVPGAGHSANEPGIAAELVAANEKLKNVLEGVS	At2g14260	XP_004250732.1 Walling (2006)	3	6	3	0.501	0.00323071	4	2	6	Cp	55	2	Cp	possibly M	Cp	Cp	98.6	-	vacuole	-
	Solyc07g026950	XPD	Xaa-Pro dipeptidase (AHRD V1 ***- B6TL64_MAIZE); contains Interpro domain(s) IPR007865 Peptidase M24B, X-Pro dipeptidase/aminopeptidase P N-terminal	MASSSPSSMSPPMIRMELHSLNREKLFNSLRNHLTSCARPLQGFVLLQGGEEQTRHCTDHLELFRQESYFAYLFGVEEPGFYGTIDIASGKSMLFIPRLPADYAVWMGEIQPPSHFQEKYKVTQVFYTDEIKEVLVDQYQATGAALLFLLHGLNTDSNKYFKPAEFQGIPRLTTLLISVLTMPGHIASQQAGQRESFSLRCSLLI	At4g29490	XP_010323464.1 Walling (2006)	1	4	1	0.334	0.00215381	3	0	3	Cp	2	2	-	-	Cp	Cp	92.5	-	-	-
Other peptidases	Solyc05g014310	HHL1	HHL1-Hypersensitive to highlight. Metalloendopeptidase family-saccharolysin &amp thimet oligopeptidase (ISS) (AHRD V1 *-*- Q01G48_OSTTA) [PREDICTED: protein HHL1, chloroplastic] Forms a complex with LQY1 that is involved in the repair and reassembly cycle of the PSII-LHCII supercomplex under high-light conditions. May function in guiding the release of psbC from PSII core monomers.	MEVAMSLNPLVRLPLSNSRTHEEFSVLKHSVVSTTNRRIQKRKLLVVEAKGRKGGMAARQYQRMAPPMPKIEDDGNPKFVIFIRMANVYLWYPLNIITGGTTAKIMVAAKDNFLGKYIYKDTLARNLAAVIYNDEKEIKKLAMKQHRVLKSATEFRYGYKLVENNNLRAALSTSDVIELPTPDKLKTVVDKVKDFFGDAKESFGKLTALPESSEEDSPKDNTPAKK	At1g67700	XP_004239174.1	4	12	4	0.668	0.00430761	5	1	6	Cp	32	4	-	possibly Cp	Cp	N	65.6	plastid	plastid	-
	Solyc05g007500	-	CAAX amino terminal protease family protein (AHRD V1 ***- B6T405_MAIZE); contains Interpro domain(s) IPR003675 Abortive infection protein	MAGNLCITLTQSSPFSPKLYYSSKPLLQKSHRISIAPFLKFQDSAPSQGSTRGFTTICFSSPRNGPGYKGGGPDWPILrRNAWDVPWNWQTVSLSSLACGCSFVLTGLIEAASIPYVGLDVEALSLDEKAEILFADQAITTAVVLIVLYALTKSSQPLPDDIYRYDLKEPFNLQRGWLLWAGIGLGGAIGAIALTGVAMSAFNGEPPQRETDALARLLPLIGSSSISTASLLGITGVLAPILEETVFRGFFMVSLTKWVPTPLAAVISGAVFALAHLTPGQFPQLFVLGTALGFSYAQTRNLLTPITIHALWNSGVILLLTFLQLQGYDIREIIQGT	At1g14270	XP_004238797.1	1	1	1	0.212	0.00136709	1	0	1	M	54	5	Cp	Cp	Cp	Cp	99.3	plastid mitochondria	plastid	-
	Solyc11g027830	-	Lon-domain containing protein; Unknown Protein (AHRD V1); contains Interpro domain(s) IPR003111 Peptidase S16, lon N-terminal	MNVSLSFCQPSTLCTSKTQLLPFTFTSTPILFSFSHSRKKrRNARFVSYASSSELPLLPFPIDQVLVPSEAKTLHLYEARYLALLEESLFKKKKFFVHFVLDPIAINDTSGEASFAARYGCLVAIEKVEQLEIGALVSIRGIGRVKILKFQQAEPYLTGAVMPLLDNTPYSDTELSSKVLKIKEALHSLNSLEIKLKAPQDAALQTLTANSLRWSENTPALDCDNGFIPPLAELVSFAALQPVSGSSESELLKLQKMKLRAMDIKDTLDRLEDSIGYVQDNISLVAAKLAIQSLDSRL	At1g35340	XP_004250632.1	4	15	4	1.783	0.0114977	5	3	8	Cp	46	2	Cp	Cp	Cp	Cp	79.7	plastid stroma	plastid	-
	Solyc03g005000	-	Peptidase M48 Ste24p (AHRD V1 ***- B6TA12_MAIZE); contains Interpro domain(s) IPR001915 Peptidase M48, Ste24p	MASLCFSPSVLSCKIKPPITGFRKQRLSLFVCRAASLPFRDLDADDFRHPLDRQNTLLLRAIPGLKDIGKALLGTVSEQIMLLENIGTSVLVSEDQLPELHYLMVEASRILNIEAPDLYIRQSPVPNAYTLAVSGKKPFVVVHTSLVELLSRNELQAVLAHELGHLKCDHGVWLTFANVLTLGAYTVPGVGSLIAQRLEEQLLRWLRAAELTCDRAALLVAQDPKVVVSVLMKLAGGCPSLSDQLNVDAFLEQARSYDKASSSPVGWYIRNAQTRQLSHPLPVLRAREIDEWSRSQEYRSLLQRAIQVNPVQKV	At3g27110	XP_004233997.1	3	6	3	0.438	0.00282445	3	2	5	Cp	33	3	Cp	Cp	Cp	G	45.9	plastoglobules	plastid	-
	Solyc04g080870	-	Peptidase S16 lon domain protein	MKDVIRLSNRLNGKPEKEATDLRRNLFPTPFSFFVGSTFEGAPREQQALLELEDTAMRLKREKETLRNTLNYLSAASAVKDVFPST	At1g75460	XP_004238305.1	2	9	2	9	0.0580367	5	2	7	-	-	3	-	-	Cp	N	55.33	plastid	plastid	-
A Proteins were identified by acetone preparations and/or the gel method. For emPAI and Mol% calculations, only the data from the acetone prepartions were used. Proteins identified solely by the gel method have data for the number of peptides, PSMs and unique peptides.
B SolGenomics descriptors of encoded proteins is provided. Some descriptors were manually updated based on BLASTP searches at NCBI; these accessions have an asterix (*).
C Tomato gene names were derived from Sol Genomics, literature, NCBI accession names and, in some instances, guided by Arabiopsis homolog names.
D Target P's subcellular locations are: choroplast (Cp), mitochondria (M), secretory (S), and no predicted location is indicated by a dash (-).											2.59792
E ChloroP was used to predict the presence of a chloroplast transit peptide (Y) and the lack of a predicted transit peptide is indicated with a dash (-).
F Predotar's predicted subcellular locations were: chloroplast/plastid (Cp),endoplasmic reticulum (ER) or mitochondrion (M). For proteins with localization predictions that were less clear, Predotar provided categorized of possibly Cp, M and ER. Proteins with unresolved locations or that did not have a homolog detected by Predotar are indicated with a dash (-).
G WoLF PSORT's and YLoc's predicted subcellular locations were: chloroplast/plastid (Cp), cytosol (C), cytoskeleton (Cy), endoplasmic reticulum (ER), extracellular (EX), golgi apparatus (G), mitochondrion (M), nucleus (N), peroxisomes (P), plasma membrance (PM), and vacuole (V). Proteins with unresolved locations or that did not have a homolog detected by Predotar are indicated with a dash (-).
H In our hands, there are two tomato CLPC1 proteins with greatest protein identity to Arabidopsis' CLPC1 (At5g0920) and a weaker identity to AtCLPC2 (At3g11830) . This differs from the analyses of D'Andreas et al (2018); despite this, we have used the D'Andreas et al CLPC nomenclature.
I There are two tomato genes with high identity with Arabidopsis DEG2.
J The tomato EGY3 protein (Solyc01g106820) is predicted to be chloroplast localized, but was not detected.
K In Arabidopsis there are FtsH7 and FtsH9 are a homologous pair of genes. Based on BlastP searches at Sol Genomics and NCBI, there is only one FtsH7/9-encoding gene with e values of 0 to both AtFtsH7 and AtFtsH9. The gene is designated as FtsH7.
L At2g47390 was originally designated as an acylpeptide hydrolase-like peptidase called AARE4 (Walling, 2006). More recently Bhuiyan et al. (2020) determined that At2g47390 encodes a chloroplast glutamyl endopeptidase (CGEP) . Both names are indicated.
M The DAP protein used in for peptide matches in Proteome Discoverer was a partial protien from ITAG2.1. A current NCBI accession (XP_004249975.1) is the corresponding full-length protein. TargetP predicts 54 residue transit peptide (reliablity class 2) and is consistent with the AtDAP2 reported by Park et al (2017). All localization predictions in this table are based on the partial ITAG2.1 prot…
N In ITAG2.1 the three Lap genes of tomato are misannotated (LapA1, LapA2 and LapN). This is being resolved in ITAG4.0. The LAP-A1 and LAP-A2 proteins are only discriminated in the COOH portion of their proteins, luckily these were present in the ITAG2.1 gene designators. The new loci will be Solyc12g10020 (LapA1), Solyc12g10030 (LapA2), and Solyc12g10040 (LapN).
